# Supplementary material for: PRAME induces genomic instability in uveal melanoma
Source: Oncogene. 2023 Nov 29;43(8):555–65. doi: 10.1038/s41388-023-02887-0 (PMC10873199; doi:10.1038/s41388-023-02887-0)
Supplement: Supplementary file 7 — Supplementary Table 1 [file 41388_2023_2887_MOESM7_ESM.xlsx]

## Sheet: Sheet1
Test:	1010 -Routine Chromosome Study (ST/POC)
Banding technique:	G-bands
Banding resolution:	400
Sample:	Cytogenic result:
UMC026, GFP, 7 months induced	46,XY
UMC026, PRAME, 7 months induced	46,XY,add(6)(q27),-16,+mar[3]/50,XY,+6,+7,+12,-16,+22,+mar[17]
