# Supplementary material for: PRAME induces genomic instability in uveal melanoma
Source: Oncogene. 2023 Nov 29;43(8):555–65. doi: 10.1038/s41388-023-02887-0 (PMC10873199; doi:10.1038/s41388-023-02887-0)
Supplement: Supplementary file 8 — Supplementary Table 2 [file 41388_2023_2887_MOESM8_ESM.xlsx]

## Sheet: Supp Table 5_Proteomics_PRAME
id	Sequence	Amino acid before	Amino acid after	Length	Missed cleavages	Mass	Proteins	Leading razor protein	Start position	End position	Gene names	Protein names	Intensity Sample	Protein group IDs	MS/MS Count
39	AHAAQVTCVAASPHK	R	D	15	0	1546.77	H0Y711;A0A024R0H7;Q9BQA1	A0A024R0H7	165	179	WDR77	Methylosome protein 50	338640000	3;121	5
40	AHAAQVTCVAASPHKDSVFLSCSEDNR	R	I	27	1	2956.36	H0Y711;A0A024R0H7;Q9BQA1	A0A024R0H7	165	191	WDR77	Methylosome protein 50	858180000	3;121	92
41	AHAAQVTCVAASPHKDSVFLSCSEDNRILLWDTR	R	C	34	2	3853.86	H0Y711;A0A024R0H7;Q9BQA1	A0A024R0H7	165	198	WDR77	Methylosome protein 50	1902600	3;121	1
137	CWAGSLWLFK	R	D	10	0	1266.62	A0A024R0H7;Q9BQA1;Q9BQA1-2;B4DJP0	A0A024R0H7	53	62	WDR77	Methylosome protein 50	500260000	3	2
138	CWAGSLWLFKDPCAAPNEGFCSAGVQTEAGVADLTWVGER	R	G	40	1	4412.01	A0A024R0H7;Q9BQA1;Q9BQA1-2;B4DJP0	A0A024R0H7	53	92	WDR77	Methylosome protein 50	347650000	3	8
148	DATWSPLNHSLLTTVGWDHQVVHHVVPTEPLPAPGPASVTE	R	-	41	0	4391.2	H0Y711;A0A024R0H7;Q9BQA1;Q9BQA1-2	A0A024R0H7	302	342	WDR77	Methylosome protein 50	2703100000	3;121	3
184	DPCAAPNEGFCSAGVQTEAGVADLTWVGER	K	G	30	0	3163.4	A0A024R0H7;Q9BQA1;Q9BQA1-2;B4DJP0	A0A024R0H7	63	92	WDR77	Methylosome protein 50	623030000	3	6
194	DSVFLSCSEDNR	K	I	12	0	1427.6	H0Y711;A0A024R0H7;Q9BQA1;Q9BQA1-2	A0A024R0H7	180	191	WDR77	Methylosome protein 50	340980000	3;121	3
260	ETPPPLVPPAAR	K	E	12	0	1243.69	A0A024R0H7;Q9BQA1;Q9BQA1-2;B4DJP0	A0A024R0H7	4	15	WDR77	Methylosome protein 50	2047700000	3	5
269	EWNLPPNAPACMER	R	Q	14	0	1683.75	A0A024R0H7;Q9BQA1;Q9BQA1-2;B4DJP0	A0A024R0H7	16	29	WDR77	Methylosome protein 50	502710000	3	26
271	FCKYEHDDIVSTVSVLSSGTQAVSGSK	K	D	27	1	2900.39	H0Y711;A0A024R0H7;Q9BQA1	A0A024R0H7	119	145	WDR77	Methylosome protein 50	2151600000	3;121	23
272	FCKYEHDDIVSTVSVLSSGTQAVSGSKDICIK	K	V	32	2	3529.71	H0Y711;A0A024R0H7;Q9BQA1	A0A024R0H7	119	150	WDR77	Methylosome protein 50	4649500	3;121	1
335	GILVASDSGAVELWELDENETLIVSK	R	F	26	0	2786.42	H0Y711;A0A024R0H7;Q9BQA1	A0A024R0H7	93	118	WDR77	Methylosome protein 50	447660000	3;121	15
430	ILLWDTR	R	C	7	0	915.518	H0Y711;A0A024R0H7;Q9BQA1;Q9BQA1-2	A0A024R0H7	192	198	WDR77	Methylosome protein 50	2814400000	3;121	3
477	KETPPPLVPPAAR	R	E	13	1	1371.79	A0A024R0H7;Q9BQA1;Q9BQA1-2;B4DJP0	A0A024R0H7	3	15	WDR77	Methylosome protein 50	707680000	3	3
710	PASQIGCSAPGYLPTSLAWHPQQSEVFVFGDENGTVSLVDTK	K	S	42	0	4489.15	H0Y711;A0A024R0H7;Q9BQA1;Q9BQA1-2	A0A024R0H7	202	243	WDR77	Methylosome protein 50	29669000	3;121	1
793	SDGALLLGASSLSGR	R	C	15	0	1402.74	A0A024R0H7;Q9BQA1;Q9BQA1-2;B4DJP0	A0A024R0H7	38	52	WDR77	Methylosome protein 50	1842300000	3	10
853	SQAHRDFVR	R	D	9	1	1114.56	H0Y711;A0A024R0H7;Q9BQA1;Q9BQA1-2	A0A024R0H7	293	301	WDR77	Methylosome protein 50	17414000	3;121	1
1044	VWDLAQQVVLSSYR	K	A	14	0	1662.87	H0Y711;A0A024R0H7;Q9BQA1	A0A024R0H7	151	164	WDR77	Methylosome protein 50	3073400000	3;121	13
1064	YEHDDIVSTVSVLSSGTQAVSGSK	K	D	24	0	2465.19	H0Y711;A0A024R0H7;Q9BQA1	A0A024R0H7	122	145	WDR77	Methylosome protein 50	1532700000	3;121	11
1092	YRSDGALLLGASSLSGR	R	C	17	1	1721.91	A0A024R0H7;Q9BQA1;Q9BQA1-2;B4DJP0	A0A024R0H7	36	52	WDR77	Methylosome protein 50	2470400000	3	9
361	GTVLDQVPVNPSLYLIK	K	Y	17	0	1855.05	A0A024R297;Q9Y657;Q5JUX0	A0A024R297	74	90	SPIN;SPIN1;SPIN3	Spindlin-1;Spindlin-3	3828900	8	0
1030	VSALEVLPDR	R	V	10	0	1097.61	A0A024R297;Q9Y657	A0A024R297	108	117	SPIN;SPIN1	Spindlin-1	4123500	8	1
1060	YDGFDCVYGLELNKDER	K	V	17	1	2091.92	A0A024R297;Q9Y657	A0A024R297	91	107	SPIN;SPIN1	Spindlin-1	4997900	8	1
823	SIQADGLVWGSSK	R	L	13	0	1346.68	A0A024R3W7;P24534;A4D1M6	A0A024R3W7	164	176	EEF1B2;LOC392793	Elongation factor 1-beta	4638200	9	1
844	SPAGLQVLNDYLADK	K	S	15	0	1602.83	A0A024R3W7;P24534;F8WF65;F2Z2G2;C9JZW3	A0A024R3W7	8	22	EEF1B2	Elongation factor 1-beta	2683700	9	1
865	SSILLDVKPWDDETDMAKLEECVR	K	S	24	2	2848.36	A0A024R3W7;P24534;A4D1M6	A0A024R3W7	140	163	EEF1B2;LOC392793	Elongation factor 1-beta	7406200	9	1
95	ATASSSAQEMEQQLAER	K	E	17	0	1835.83	A0A024R478;A0A087X1P5;J3KQ34;A0A024R471;Q9H9Q2-2;Q9H9Q2;B3KW51;B3KV02;J3QT73	A0A024R478	115	131	COPS7B	COP9 signalosome complex subunit 7b	11752000	13	4
678	NLRELEDLIIEAVYTDIIQGK	R	L	21	1	2444.32	A0A024R478;A0A087X1P5;J3KQ34;A0A024R471;Q9H9Q2-2;Q9H9Q2;B3KW51;B3KV02;J3QT95;Q53GQ2;Q9H9Q2-3	A0A024R478	17	37	COPS7B	COP9 signalosome complex subunit 7b	5680400	13	1
690	NQLLEVDFCIGR	R	D	12	0	1462.72	A0A024R478;A0A087X1P5;J3KQ34;A0A024R471;Q9H9Q2-2;Q9H9Q2;B3KV02;J3QT73;J3QT95;Q53GQ2;Q9H9Q2-3	A0A024R478	42	53	COPS7B	COP9 signalosome complex subunit 7b	2065300	13	1
917	TLHEWCDGCEAVLLGIEQQVLR	K	A	22	0	2625.27	A0A024R478;A0A087X1P5;J3KQ34;A0A024R471;Q9H9Q2-2;Q9H9Q2;B3KW51;J3QT73;J3QT95;Q9H9Q2-3	A0A024R478	66	87	COPS7B	COP9 signalosome complex subunit 7b	25561000	13	1
940	TQQQVEAEVTNIKK	R	T	14	1	1614.86	A0A024R478;A0A087X1P5;J3KQ34;A0A024R471;Q9H9Q2-2;Q9H9Q2;B3KW51;B3KV02;J3QT73;Q53GQ2	A0A024R478	98	111	COPS7B	COP9 signalosome complex subunit 7b	15643000	13	1
22	ADTQTYQPYNKDWIK	R	E	15	1	1869.89	A0A024R6D4;P84090	A0A024R6D4	74	88	ERH	Enhancer of rudimentary homolog	79782000	18	1
23	ADTQTYQPYNKDWIKEK	R	I	17	2	2127.03	A0A024R6D4;P84090	A0A024R6D4	74	90	ERH	Enhancer of rudimentary homolog	15550000	18	2
463	IYVLLRR	K	Q	7	1	931.597	A0A024R6D4;P84090	A0A024R6D4	91	97	ERH	Enhancer of rudimentary homolog	13469000	18	1
658	MYEEHLKR	K	M	8	1	1104.54	A0A024R6D4;P84090;G3V279	A0A024R6D4	35	42	ERH	Enhancer of rudimentary homolog	21403000	18	3
817	SHTILLVQPTK	M	R	11	0	1235.72	A0A024R6D4;P84090;G3V279	A0A024R6D4	2	12	ERH	Enhancer of rudimentary homolog	176580000	18	2
818	SHTILLVQPTKRPEGR	M	T	16	2	1831.04	A0A024R6D4;P84090;G3V279	A0A024R6D4	2	17	ERH	Enhancer of rudimentary homolog	54065000	18	2
962	TYADYESVNECMEGVCK	R	M	17	0	2053.81	A0A024R6D4;P84090;G3V279	A0A024R6D4	18	34	ERH	Enhancer of rudimentary homolog	235650000	18	5
454	ITFTGEADQAPGVEPGDIVLLLQEK	R	E	25	0	2639.37	A0A024R6S1;O60884	A0A024R6S1	231	255	DNAJA2	DnaJ homolog subfamily A member 2	2093700	19	1
606	LYDILGVPPGASENELKK	K	A	18	1	1942.04	A0A024R6S1;O60884;I3L320;T2DN57;T2DPK5	A0A024R6S1	9	26	DNAJA2	DnaJ homolog subfamily A member 2	0	19	1
365	GYKPPDEGPSEYQTIPLNKIEDFGVHCK	K	Q	28	2	3217.54	A0A024R7W9;Q92905;Q59GH5;E5RHH5	A0A024R7W9	192	219	COPS5	COP9 signalosome complex subunit 5	5003100	21	1
538	LEQSEAQLGR	K	G	10	0	1129.57	A0A024R7W9;Q92905;Q59GH5	A0A024R7W9	273	282	COPS5	COP9 signalosome complex subunit 5	2557800	21	1
811	SGGNLEVMGLMLGK	R	V	14	0	1404.71	A0A024R7W9;Q92905;Q59GH5;E5RHH5;E5RHF2	A0A024R7W9	71	84	COPS5	COP9 signalosome complex subunit 5	2316200	21	1
958	TWELANNMQEAQSIDEIYK	K	Y	19	0	2282.05	A0A024R7W9;Q92905;E5RFS1;E5RG35;E5RK55	A0A024R7W9	12	30	COPS5	COP9 signalosome complex subunit 5	2166000	21	1
959	TWELANNMQEAQSIDEIYKYDKK	K	Q	23	2	2816.33	A0A024R7W9;Q92905;E5RFS1;E5RG35;E5RK55	A0A024R7W9	12	34	COPS5	COP9 signalosome complex subunit 5	8105600	21	1
973	VDGETMIIMDSFALPVEGTETR	K	V	22	0	2410.14	A0A024R7W9;Q92905;Q59GH5;E5RHH5;E5RHF2	A0A024R7W9	85	106	COPS5	COP9 signalosome complex subunit 5	1015400	21	1
1017	VNAQAAAYEYMAAYIENAK	R	Q	19	0	2089.98	A0A024R7W9;Q92905;Q59GH5;E5RHH5;E5RHF2	A0A024R7W9	107	125	COPS5	COP9 signalosome complex subunit 5	1395700	21	1
73	AMLSGPGQFAENETNEVNFR	K	E	20	0	2210.01	A0A024R7Y5;Q15369;E5RHG8;Q15369-2	A0A024R7Y5	44	63	TCEB1	Transcription elongation factor B polypeptide 1	781080000	22	3
74	AMLSGPGQFAENETNEVNFREIPSHVLSK	K	V	29	1	3200.56	A0A024R7Y5;Q15369;E5RHG8;Q15369-2	A0A024R7Y5	44	72	TCEB1	Transcription elongation factor B polypeptide 1	15616000	22	1
229	EHALTSGTIK	R	A	10	0	1055.56	A0A024R7Y5;Q15369;E5RHG8;Q15369-2;R4GMY8	A0A024R7Y5	34	43	TCEB1	Transcription elongation factor B polypeptide 1	587110000	22	1
233	EIPSHVLSK	R	V	9	0	1008.56	A0A024R7Y5;Q15369;E5RHG8;Q15369-2	A0A024R7Y5	64	72	TCEB1	Transcription elongation factor B polypeptide 1	361130000	22	1
559	LISSDGHEFIVK	K	R	12	0	1343.71	A0A024R7Y5;Q15369;E5RHG8;Q15369-2;R4GMY8	A0A024R7Y5	21	32	TCEB1	Transcription elongation factor B polypeptide 1	1136600000	22	5
560	LISSDGHEFIVKR	K	E	13	1	1499.81	A0A024R7Y5;Q15369;E5RHG8;Q15369-2;R4GMY8	A0A024R7Y5	21	33	TCEB1	Transcription elongation factor B polypeptide 1	199110000	22	5
622	MDGEEKTYGGCEGPDAMYVK	-	L	20	1	2235.91	A0A024R7Y5;Q15369;E5RHG8;R4GMY8	A0A024R7Y5	1	20	TCEB1	Transcription elongation factor B polypeptide 1	186610000	22	1
764	REHALTSGTIK	K	A	11	1	1211.66	A0A024R7Y5;Q15369;E5RHG8;Q15369-2;R4GMY8	A0A024R7Y5	33	43	TCEB1	Transcription elongation factor B polypeptide 1	19544000	22	6
963	TYGGCEGPDAMYVK	K	L	14	0	1546.64	A0A024R7Y5;Q15369;E5RHG8;R4GMY8	A0A024R7Y5	7	20	TCEB1	Transcription elongation factor B polypeptide 1	1136400000	22	7
1096	YTNSSTEIPEFPIAPEIALELLMAANFLDC	R	-	30	0	3368.62	A0A024R7Y5;Q15369;Q15369-2	A0A024R7Y5	83	112	TCEB1	Transcription elongation factor B polypeptide 1	288620000	22	2
77	APLDLDKYVEIAR	M	L	13	1	1501.81	A0A024R861;O00743-2;O00743;O00743-3	A0A024R861	2	14	PPP6C	Serine/threonine-protein phosphatase;Serine/threonine-protein phosphatase 6 catalytic subunit;Serine/threonine-protein phosphatase 6 catalytic subunit, N-terminally processed	1473400	23	1
313	GAFCDLVWSDPEDVDTWAISPR	K	G	22	0	2535.14	A0A024R861;O00743-2;O00743;O00743-3;B7Z3E2	A0A024R861	189	210	PPP6C	Serine/threonine-protein phosphatase;Serine/threonine-protein phosphatase 6 catalytic subunit;Serine/threonine-protein phosphatase 6 catalytic subunit, N-terminally processed	832640	23	1
603	LVTVWSAPNYCYR	K	C	13	0	1627.78	A0A024R861;O00743-2;O00743;O00743-3;B7Z3E2	A0A024R861	252	264	PPP6C	Serine/threonine-protein phosphatase;Serine/threonine-protein phosphatase 6 catalytic subunit;Serine/threonine-protein phosphatase 6 catalytic subunit, N-terminally processed	850840	23	1
60	ALSSEGKPYVTKEELYQNLTR	R	E	21	2	2425.25	A0A024R889;A0A0D9SF54;A0A0D9SGF6;Q13813-3;Q13813;Q13813-2;B4DGT1	A0A024R889	2395	2415	SPTAN1	Spectrin alpha chain, non-erythrocytic 1	2190600	24	1
81	AQLADSFHLQQFFR	R	D	14	0	1706.85	A0A024R889;A0A0D9SF54;A0A0D9SGF6;Q13813-3;Q13813;Q13813-2;B4DGT1;B4DTV8	A0A024R889	567	580	SPTAN1	Spectrin alpha chain, non-erythrocytic 1	1817100	24	1
134	CTELNQAWSSLGK	K	R	13	0	1492.7	A0A024R889;A0A0D9SF54;A0A0D9SGF6;Q13813-3;Q13813;Q13813-2;Q9UG16	A0A024R889	1294	1306	SPTAN1;DKFZp564P0562	Spectrin alpha chain, non-erythrocytic 1	1568200	24	1
178	DLTSWVTEMK	R	A	10	0	1208.57	A0A024R889;A0A0D9SF54;A0A0D9SGF6;Q13813-3;Q13813;Q13813-2;B4DGT1;B4DTV8	A0A024R889	372	381	SPTAN1	Spectrin alpha chain, non-erythrocytic 1	1207600	24	1
208	EAFLNTEDKGDSLDSVEALIK	R	K	21	1	2293.13	A0A024R889;A0A0D9SF54;A0A0D9SGF6;Q13813-3;Q13813;Q13813-2;Q9UG16	A0A024R889	1445	1465	SPTAN1;DKFZp564P0562	Spectrin alpha chain, non-erythrocytic 1	4333900	24	1
344	GLVSSDELAKDVTGAEALLER	R	H	21	1	2172.13	A0A024R889;A0A0D9SF54;A0A0D9SGF6;Q13813-3;Q13813;Q13813-2;Q9UG16	A0A024R889	1340	1360	SPTAN1;DKFZp564P0562	Spectrin alpha chain, non-erythrocytic 1	2349800	24	0
396	IAALQAFADQLIAAGHYAK	K	G	19	0	1971.06	A0A024R889;A0A0D9SF54;A0A0D9SGF6;Q13813-3;Q13813;Q13813-2;Q9UG16	A0A024R889	1481	1499	SPTAN1;DKFZp564P0562	Spectrin alpha chain, non-erythrocytic 1	1179700	24	1
509	LAALADQWQFLVQK	R	S	14	0	1629.89	A0A024R889;A0A0D9SF54;A0A0D9SGF6;Q13813-3;Q13813;Q13813-2;Q9UG16	A0A024R889	1613	1626	SPTAN1;DKFZp564P0562	Spectrin alpha chain, non-erythrocytic 1	1732300	24	1
688	NQALNTDNYGHDLASVQALQR	K	K	21	0	2327.13	A0A024R889;A0A0D9SF54;A0A0D9SGF6;Q13813-3;Q13813;Q13813-2;Q9UG16	A0A024R889	1233	1253	SPTAN1;DKFZp564P0562	Spectrin alpha chain, non-erythrocytic 1	3400000	24	1
744	QQVAPTDDETGKELVLALYDYQEK	R	S	24	1	2752.34	A0A024R889;A0A0D9SF54;A0A0D9SGF6;Q13813-3;Q13813;Q13813-2;B4DGT1;B4DTV8	A0A024R889	958	981	SPTAN1	Spectrin alpha chain, non-erythrocytic 1	4078400	24	1
779	RQDLEDSLQAQQYFADANEAESWMR	R	E	25	1	3000.33	A0A024R889;A0A0D9SF54;A0A0D9SGF6;Q13813-3;Q13813;Q13813-2;B4DGT1;B4DTV8	A0A024R889	883	907	SPTAN1	Spectrin alpha chain, non-erythrocytic 1	3221700	24	1
964	VAEDLESEGLMAEEVQAVQQQEVYGMMPR	K	D	29	0	3265.49	A0A024R889;A0A0D9SF54;A0A0D9SGF6;Q13813-3;Q13813;Q13813-2;Q9UG16;B4DGT1;B4DTV8	A0A024R889	1133	1161	SPTAN1;DKFZp564P0562	Spectrin alpha chain, non-erythrocytic 1	706790	24	1
1007	VLETAEDIQER	K	R	11	0	1301.65	A0A024R889;A0A0D9SF54;A0A0D9SGF6;Q13813-3;Q13813;Q13813-2;B4DGT1;B4DTV8;A0A0D9SFF6	A0A024R889	8	18	SPTAN1	Spectrin alpha chain, non-erythrocytic 1	1919900	24	1
1095	YTEHSTVGLAQQWDQLDQLGMR	K	M	22	0	2575.21	A0A024R889;A0A0D9SF54;A0A0D9SGF6;Q13813-3;Q13813;Q13813-2;Q9UG16	A0A024R889	2262	2283	SPTAN1;DKFZp564P0562	Spectrin alpha chain, non-erythrocytic 1	1128000	24	1
47	AIAMSLGQDIPMDQR	R	A	15	0	1644.8	A0A024R9Y3;A0A024R9U8;A0A024R9W5;Q7Z6Z7-2;Q7Z6Z7-3;Q7Z6Z7;Q5H924;B4DGF6;Q5H962	A0A024R9Y3	1378	1392	HUWE1	E3 ubiquitin-protein ligase HUWE1	1713800	27	1
177	DLSMSEEDQMMR	R	A	12	0	1470.58	A0A024R9Y3;A0A024R9U8;A0A024R9W5;Q7Z6Z7-2;Q7Z6Z7-3;Q7Z6Z7;Q5H924;B4DGF6;Q5H962	A0A024R9Y3	1366	1377	HUWE1	E3 ubiquitin-protein ligase HUWE1	1858700	27	1
565	LLGPSAAADILQLSSSLPLQSR	R	G	22	0	2236.24	A0A024R9Y3;A0A024R9U8;A0A024R9W5;Q7Z6Z7-2;Q7Z6Z7-3;Q7Z6Z7;Q5H924	A0A024R9Y3	2580	2601	HUWE1	E3 ubiquitin-protein ligase HUWE1	3705500	27	1
568	LLVGNDDVHIIAR	R	S	13	0	1433.8	A0A024R9Y3;A0A024R9U8;A0A024R9W5;Q7Z6Z7-2;Q7Z6Z7-3;Q7Z6Z7;Q5H924	A0A024R9Y3	2606	2618	HUWE1	E3 ubiquitin-protein ligase HUWE1	6355500	27	2
685	NPDIFTEVANCCIR	R	I	14	0	1707.77	A0A024R9Y3;A0A024R9U8;A0A024R9W5;Q7Z6Z7-2;Q7Z6Z7-3;Q7Z6Z7;Q5H924	A0A024R9Y3	1881	1894	HUWE1	E3 ubiquitin-protein ligase HUWE1	1971400	27	1
747	QSTTHLADGPFAVLVDYIR	R	V	19	0	2102.08	A0A024R9Y3;A0A024R9U8;A0A024R9W5;Q7Z6Z7-2;Q7Z6Z7-3;Q7Z6Z7;Q5H924;Q53FW4;Q5H935;H0Y659	A0A024R9Y3	3957	3975	HUWE1	E3 ubiquitin-protein ligase HUWE1	1005500	27	1
869	STDRLPSAHTCFNQLDLPAYESFEK	R	L	25	1	2925.36	A0A024R9Y3;A0A024R9U8;A0A024R9W5;Q7Z6Z7-2;Q7Z6Z7-3;Q7Z6Z7;Q5H924;Q53FW4;Q5H935;H0Y659;Q3B7K0	A0A024R9Y3	4316	4340	HUWE1	E3 ubiquitin-protein ligase HUWE1	4195600	27	1
1012	VLLSPDYLPAMR	K	R	12	0	1373.74	A0A024R9Y3;A0A024R9U8;A0A024R9W5;Q7Z6Z7-2;Q7Z6Z7-3;Q7Z6Z7;B4DGF6;Q5H962	A0A024R9Y3	633	644	HUWE1	E3 ubiquitin-protein ligase HUWE1	1423400	27	1
3	AAEAGGAEEQYGFLTTPTK	K	Q	19	0	1939.92	A0A024RAM4;P46821;A2BDK6;Q5H9P1	A0A024RAM4	1052	1070	MAP1B;DKFZp686F1345	Microtubule-associated protein 1B;MAP1B heavy chain;MAP1 light chain LC1	9866300	28	1
52	AIGNIELGIR	R	S	10	0	1054.61	A0A024RAM4;P46821;Q05BW8;D6RA32;Q86X89;Q32NB7;Q6PJD3;A5D6X1;Q4VBY4;D6RCL2;D6RGJ3	A0A024RAM4	55	64	MAP1B	Microtubule-associated protein 1B;MAP1B heavy chain;MAP1 light chain LC1	5525200	28	1
92	ASVLFDTMQHHLALNR	R	D	16	0	1851.94	A0A024RAM4;P46821;A2BDK6;Q5H9P1	A0A024RAM4	1834	1849	MAP1B;DKFZp686F1345	Microtubule-associated protein 1B;MAP1B heavy chain;MAP1 light chain LC1	7371600	28	1
181	DMSLYASLTSEK	R	V	12	0	1343.63	A0A024RAM4;P46821;A2BDK6;Q5H9P1	A0A024RAM4	1758	1769	MAP1B;DKFZp686F1345	Microtubule-associated protein 1B;MAP1B heavy chain;MAP1 light chain LC1	0	28	1
383	HMDPPPAPVQDR	K	S	12	0	1358.64	A0A024RAM4;P46821;A2BDK6;Q5H9P1	A0A024RAM4	2197	2208	MAP1B;DKFZp686F1345	Microtubule-associated protein 1B;MAP1B heavy chain;MAP1 light chain LC1	3674400	28	1
388	HSPTEDEESAKAEADAYIR	K	E	19	1	2117.95	A0A024RAM4;P46821;A2BDK6;Q5H9P1	A0A024RAM4	969	987	MAP1B;DKFZp686F1345	Microtubule-associated protein 1B;MAP1B heavy chain;MAP1 light chain LC1	8200800	28	2
475	KESKEETPEVTK	R	V	12	2	1403.71	A0A024RAM4;P46821;A2BDK6;Q05BW8;D6RA32;Q86X89;Q32NB7;Q6PJD3;A5D6X1;Q4VBY4;D6RA40;A5D8X6	A0A024RAM4	559	570	MAP1B	Microtubule-associated protein 1B;MAP1B heavy chain;MAP1 light chain LC1	1367800	28	0
483	KIAELEEEQSQGSTTNSDWMK	R	N	21	1	2410.1	A0A024RAM4;P46821;A2BDK6;Q05BW8;D6RA32;Q86X89;Q32NB7;Q6PJD3;A5D6X1;Q4VBY4;D6RA40;A5D8X6	A0A024RAM4	327	347	MAP1B	Microtubule-associated protein 1B;MAP1B heavy chain;MAP1 light chain LC1	10328000	28	1
490	KLGDVSPTQIDVSQFGSFKEDTK	R	M	23	2	2525.26	A0A024RAM4;P46821;A2BDK6;Q5H9P1	A0A024RAM4	1496	1518	MAP1B;DKFZp686F1345	Microtubule-associated protein 1B;MAP1B heavy chain;MAP1 light chain LC1	3329600	28	1
499	KTDDVEAMSSQPALALDER	K	K	19	1	2074.98	A0A024RAM4;P46821;A2BDK6;Q5H9P1	A0A024RAM4	1477	1495	MAP1B;DKFZp686F1345	Microtubule-associated protein 1B;MAP1B heavy chain;MAP1 light chain LC1	20260000	28	2
537	LEMYVLNPVK	K	S	10	0	1204.65	A0A024RAM4;P46821;A2BDK6;Q05BW8;D6RA32;Q86X89;Q32NB7;Q6PJD3;A5D6X1;Q4VBY4;D6RA40;A5D8X6	A0A024RAM4	420	429	MAP1B	Microtubule-associated protein 1B;MAP1B heavy chain;MAP1 light chain LC1	2102500	28	1
648	MSISEGTVSDK	K	S	11	0	1152.53	A0A024RAM4;P46821;A2BDK6;Q5H9P1	A0A024RAM4	1519	1529	MAP1B;DKFZp686F1345	Microtubule-associated protein 1B;MAP1B heavy chain;MAP1 light chain LC1	6532000	28	1
675	NLISPDLGVVFLNVPENLKNPEPNIK	K	M	26	1	2872.57	A0A024RAM4;P46821;A2BDK6;Q05BW8;D6RA32;Q86X89;Q32NB7;Q6PJD3;A5D6X1;Q4VBY4;D6RA40;A5D8X6	A0A024RAM4	348	373	MAP1B	Microtubule-associated protein 1B;MAP1B heavy chain;MAP1 light chain LC1	31484000	28	2
703	NVDVEFFKR	K	V	9	1	1152.59	A0A024RAM4;P46821;A2BDK6;Q5H9P1	A0A024RAM4	2371	2379	MAP1B;DKFZp686F1345	Microtubule-associated protein 1B;MAP1B heavy chain;MAP1 light chain LC1	0	28	1
727	QGSPDQVSPVSEMTSTSLYQDKQEGK	K	S	26	1	2825.3	A0A024RAM4;P46821;A2BDK6;Q5H9P1	A0A024RAM4	1436	1461	MAP1B;DKFZp686F1345	Microtubule-associated protein 1B;MAP1B heavy chain;MAP1 light chain LC1	7854000	28	1
850	SPSDSGYSYETIGK	K	T	14	0	1489.66	A0A024RAM4;P46821;A2BDK6;Q5H9P1	A0A024RAM4	1915	1928	MAP1B;DKFZp686F1345	Microtubule-associated protein 1B;MAP1B heavy chain;MAP1 light chain LC1	10532000	28	1
862	SSAVPPGLPVYLDLCYIPNHSNSK	K	N	24	0	2627.31	A0A024RAM4;P46821;A2BDK6;Q5H9P1	A0A024RAM4	2347	2370	MAP1B;DKFZp686F1345	Microtubule-associated protein 1B;MAP1B heavy chain;MAP1 light chain LC1	3898100	28	1
864	SSHLPTEVIEKPPAVPVSFEFSDAKDENER	K	A	30	2	3353.64	A0A024RAM4;P46821;A2BDK6;Q5H9P1	A0A024RAM4	1345	1374	MAP1B;DKFZp686F1345	Microtubule-associated protein 1B;MAP1B heavy chain;MAP1 light chain LC1	5885100	28	1
866	SSYYVVSGNDPAAEEPSR	R	A	18	0	1926.86	A0A024RAM4;P46821;A2BDK6;Q5H9P1	A0A024RAM4	2382	2399	MAP1B;DKFZp686F1345	Microtubule-associated protein 1B;MAP1B heavy chain;MAP1 light chain LC1	0	28	1
868	STDFAPIKEDFGQEK	K	K	15	1	1710.81	A0A024RAM4;P46821;A2BDK6;Q5H9P1	A0A024RAM4	1462	1476	MAP1B;DKFZp686F1345	Microtubule-associated protein 1B;MAP1B heavy chain;MAP1 light chain LC1	25089000	28	2
878	SVGNTIDPVILFQK	R	M	14	0	1529.85	A0A024RAM4;P46821;A2BDK6;Q05BW8;D6RA32;Q86X89;Q32NB7;Q6PJD3;A5D6X1;Q4VBY4;D6RA40;A5D8X6	A0A024RAM4	401	414	MAP1B	Microtubule-associated protein 1B;MAP1B heavy chain;MAP1 light chain LC1	5780400	28	1
881	SVNFSLTPNEIK	R	V	12	0	1347.7	A0A024RAM4;P46821;A2BDK6;Q5H9P1	A0A024RAM4	1276	1287	MAP1B;DKFZp686F1345	Microtubule-associated protein 1B;MAP1B heavy chain;MAP1 light chain LC1	16956000	28	1
883	SWDTNLIECNLDQELK	R	L	16	0	1976.91	A0A024RAM4;P46821;Q05BW8;D6RA32;Q86X89;Q32NB7;Q6PJD3;A5D6X1;Q4VBY4;D6RCL2;D6RGJ3	A0A024RAM4	65	80	MAP1B	Microtubule-associated protein 1B;MAP1B heavy chain;MAP1 light chain LC1	10039000	28	2
893	TATCHSSSSPPIDAASAEPYGFR	K	A	23	0	2408.07	A0A024RAM4;P46821;A2BDK6;Q5H9P1	A0A024RAM4	1811	1833	MAP1B;DKFZp686F1345	Microtubule-associated protein 1B;MAP1B heavy chain;MAP1 light chain LC1	14807000	28	3
896	TDDVEAMSSQPALALDER	K	K	18	0	1946.89	A0A024RAM4;P46821;A2BDK6;Q5H9P1	A0A024RAM4	1478	1495	MAP1B;DKFZp686F1345	Microtubule-associated protein 1B;MAP1B heavy chain;MAP1 light chain LC1	3131100	28	1
931	TPEEGGYSYDISEK	R	T	14	0	1573.68	A0A024RAM4;P46821;A2BDK6;Q5H9P1	A0A024RAM4	1949	1962	MAP1B;DKFZp686F1345	Microtubule-associated protein 1B;MAP1B heavy chain;MAP1 light chain LC1	11481000	28	1
932	TPQASTYSYETSDLCYTAEK	R	K	20	0	2313.99	A0A024RAM4;P46821;A2BDK6;Q5H9P1	A0A024RAM4	2051	2070	MAP1B;DKFZp686F1345	Microtubule-associated protein 1B;MAP1B heavy chain;MAP1 light chain LC1	3504200	28	2
933	TPQASTYSYETSDLCYTAEKK	R	S	21	1	2442.09	A0A024RAM4;P46821;A2BDK6;Q5H9P1	A0A024RAM4	2051	2071	MAP1B;DKFZp686F1345	Microtubule-associated protein 1B;MAP1B heavy chain;MAP1 light chain LC1	3728100	28	1
945	TSDVGGYYYEK	R	I	11	0	1280.56	A0A024RAM4;P46821;A2BDK6;Q5H9P1	A0A024RAM4	1898	1908	MAP1B;DKFZp686F1345	Microtubule-associated protein 1B;MAP1B heavy chain;MAP1 light chain LC1	8657500	28	1
952	TTKTPEDGDYSYEIIEK	K	T	17	1	1987.93	A0A024RAM4;P46821;A2BDK6;Q5H9P1	A0A024RAM4	1929	1945	MAP1B;DKFZp686F1345	Microtubule-associated protein 1B;MAP1B heavy chain;MAP1 light chain LC1	5426600	28	2
954	TTSPPEVSGYSYEKTER	K	S	17	1	1929.9	A0A024RAM4;P46821;A2BDK6;Q5H9P1	A0A024RAM4	1963	1979	MAP1B;DKFZp686F1345	Microtubule-associated protein 1B;MAP1B heavy chain;MAP1 light chain LC1	2056800	28	1
977	VDSILLTHIGDDNLPGINSMLQR	R	K	23	0	2520.3	A0A024RAM4;P46821;A2BDK6;Q05BW8;D6RA32;Q86X89;Q32NB7;Q6PJD3;A5D6X1;Q4VBY4;D6RA40;A5D8X6	A0A024RAM4	304	326	MAP1B	Microtubule-associated protein 1B;MAP1B heavy chain;MAP1 light chain LC1	2377000	28	1
1009	VLFPGNSTQYNILEGLEK	R	L	18	0	2021.05	A0A024RAM4;P46821;A2BDK6;Q05BW8;D6RA32;Q86X89;Q32NB7;Q6PJD3;A5D6X1;Q4VBY4;D6RA40;A5D8X6	A0A024RAM4	487	504	MAP1B	Microtubule-associated protein 1B;MAP1B heavy chain;MAP1 light chain LC1	3875900	28	2
1026	VQSLEGEKLSPK	K	S	12	1	1313.72	A0A024RAM4;P46821;A2BDK6;Q5H9P1	A0A024RAM4	1770	1781	MAP1B;DKFZp686F1345	Microtubule-associated protein 1B;MAP1B heavy chain;MAP1 light chain LC1	3283200	28	0
382	HLNEIDLFHCIDPNDSK	K	H	17	0	2065.95	A0A024RB32;A0A087WYT3;B3KUY2;Q15185-3;Q15185-4;Q15185	A0A024RB32	49	65	PTGES3	Prostaglandin E synthase 3	4920200	30	1
546	LGLEDFESLK	R	V	10	0	1149.59	A0A024RD18;Q15208;B2R6F9;Q9UPD3	A0A024RD18	84	93	STK38	Serine/threonine-protein kinase 38	3740700	31	1
583	LSDFGLCTGLK	K	K	11	0	1209.61	A0A024RD18;Q15208;B2R6F9;H0YGN4;F5H277;A0A024RAW5;Q9Y2H1-2;Q9Y2H1	A0A024RD18	228	238	STK38;STK38L	Serine/threonine-protein kinase 38;Serine/threonine-protein kinase 38-like	2113000	31	1
676	NLNHSLPSDFTFQNMNSK	R	R	18	0	2092.96	A0A024RD18;Q15208	A0A024RD18	248	265	STK38	Serine/threonine-protein kinase 38	4370200	31	0
942	TRLGLEDFESLK	R	V	12	1	1406.74	A0A024RD18;Q15208;B2R6F9;Q9UPD3	A0A024RD18	82	93	STK38	Serine/threonine-protein kinase 38	1237200	31	1
1038	VTLENFYSNLIAQHEER	K	E	17	0	2062.01	A0A024RD18;Q15208;B2R6F9;Q9UPD3	A0A024RD18	25	41	STK38	Serine/threonine-protein kinase 38	7624300	31	1
1034	VSNRFSGVPDR	K	F	11	1	1232.63	A0A075B6R9	A0A075B6R9	76	86	IGKV2D-24		7920900	35	1
31	AFMTADLPNELIELLEK	K	I	17	0	1946.01	A0A087WVQ6;Q00610-2;Q00610;A0A087WX41;P53675-2;P53675	A0A087WVQ6	998	1014	CLTC;CLTCL1	Clathrin heavy chain 1;Clathrin heavy chain 2	3928700	40	1
257	ESYVETELIFALAK	R	T	14	0	1611.84	A0A087WVQ6;Q00610-2;Q00610;J3KS13	A0A087WVQ6	1170	1183	CLTC	Clathrin heavy chain 1	0	40	1
352	GQCDLELINVCNENSLFK	R	S	18	0	2151.99	A0A087WVQ6;Q00610-2;Q00610	A0A087WVQ6	928	945	CLTC	Clathrin heavy chain 1	4184200	40	1
521	LASTLVHLGEYQAAVDGAR	R	K	19	0	1970.02	A0A087WVQ6;Q00610-2;Q00610;J3KS13	A0A087WVQ6	1231	1249	CLTC	Clathrin heavy chain 1	7656100	40	1
547	LHIIEVGTPPTGNQPFPK	K	K	18	0	1944.05	A0A087WVQ6;Q00610-2;Q00610	A0A087WVQ6	232	249	CLTC	Clathrin heavy chain 1	3688000	40	1
570	LLYNNVSNFGR	K	L	11	0	1295.66	A0A087WVQ6;Q00610-2;Q00610;J3KS13	A0A087WVQ6	1220	1230	CLTC	Clathrin heavy chain 1	5913800	40	1
877	SVDPTLALSVYLR	K	A	13	0	1432.79	A0A087WVQ6;Q00610-2;Q00610	A0A087WVQ6	473	485	CLTC	Clathrin heavy chain 1	1209100	40	1
880	SVNESLNNLFITEEDYQALR	K	T	20	0	2354.14	A0A087WVQ6;Q00610-2;Q00610;J3KS13;K7EJJ5	A0A087WVQ6	1466	1485	CLTC	Clathrin heavy chain 1	3961200	40	1
921	TLQIFNIEMK	K	S	10	0	1235.66	A0A087WVQ6;Q00610-2;Q00610;J3KS13;A0A087WX41;P53675-2;P53675;J3KSQ2;F5H5N6	A0A087WVQ6	91	100	CLTC;CLTCL1	Clathrin heavy chain 1;Clathrin heavy chain 2	1824800	40	1
1052	WLLLTGISAQQNR	K	V	13	0	1498.83	A0A087WVQ6;Q00610-2;Q00610	A0A087WVQ6	168	180	CLTC	Clathrin heavy chain 1	1214400	40	0
1070	YGYIHLYDLETGTCIYMNR	K	I	19	0	2381.08	A0A087WVQ6;Q00610-2;Q00610	A0A087WVQ6	283	301	CLTC	Clathrin heavy chain 1	923580	40	1
297	FSGSGSGTDFTLK	R	I	13	0	1302.61	A0A087X0P6;A0A0A0MRZ7;A0A075B6S2;A2NJV5;B7ZMG8;Q7Z3Y5;A0A0A0MTQ6;A0A087X0Q4;A0A087WW87;A0A075B6R1;A2NB45;Q9UL80;A2IPI1;A0A075B6S6;A0A075B6S3;A0A075B6P5;Q0KKI6;Q8TCD0;P01617;P01614;P06309;P06310	A0A087X0P6	67	79	IGKV2D-29;IGKV A18;VKA17;IGKV2D-40;IGKV2D-30;IGKV2-30;IGKV2D-28	Ig kappa chain V-II region TEW;Ig kappa chain V-II region Cum;Ig kappa chain V-II region GM607;Ig kappa chain V-II region RPMI 6410	728220000	36	3
298	FSGVPDRFSGSGSGTDFTLK	R	I	20	1	2060.98	A0A087X0P6;A0A0A0MRZ7;A0A075B6S2;A2NJV5	A0A087X0P6	60	79	IGKV2D-29;IGKV A18		388100000	36	2
62	ALTSVVNYREPK	K	S	12	1	1375.75	A0A0A0MTN0;Q13617;Q13617-2;Q5T2B5;B7Z1Y1	A0A0A0MTN0	384	395	CUL2	Cullin-2	325990000	45	2
85	ARFNPSISMIKK	R	C	12	2	1390.78	A0A0A0MTN0;Q13617;Q13617-2;Q5T2B5	A0A0A0MTN0	722	733	CUL2	Cullin-2	4514800	45	0
97	ATSNLTQENMPTLFVESVLEVHGK	R	F	24	0	2643.32	A0A0A0MTN0;Q13617;Q13617-2;Q5T2B5;B7Z1Y1	A0A0A0MTN0	339	362	CUL2	Cullin-2	460640000	45	3
99	ATWNDRFSDIYALCVAYPEPLGER	R	L	24	1	2842.34	A0A0A0MTN0;Q13617;Q13617-2;Q5T2B5;B7Z1Y1;Q5T2B7	A0A0A0MTN0	46	69	CUL2	Cullin-2	71012000	45	2
112	AVSTGLPHMIQELQNHIHDEGLR	R	A	23	0	2594.3	A0A0A0MTN0;Q13617;Q13617-2;Q5T2B5;B7Z1Y1	A0A0A0MTN0	316	338	CUL2	Cullin-2	315610000	45	6
113	AVVMLEYVER	K	A	10	0	1207.63	A0A0A0MTN0;Q13617;Q13617-2;Q5T2B5;B7Z1Y1;Q5T2B7	A0A0A0MTN0	36	45	CUL2	Cullin-2	519770000	45	5
123	CIEVLIDK	K	Q	8	0	988.526	A0A0A0MTN0;Q13617;Q13617-2;Q5T2B5	A0A0A0MTN0	734	741	CUL2	Cullin-2	122240000	45	2
124	CIEVLIDKQYIER	K	S	13	1	1677.88	A0A0A0MTN0;Q13617;Q13617-2;Q5T2B5	A0A0A0MTN0	734	746	CUL2	Cullin-2	155210000	45	3
196	DTPQEMEQTR	K	S	10	0	1233.53	A0A0A0MTN0;Q13617;Q13617-2	A0A0A0MTN0	673	682	CUL2	Cullin-2	83047000	45	2
282	FKITTSMQK	K	D	9	1	1082.58	A0A0A0MTN0;Q13617;Q13617-2;Q5T2B5	A0A0A0MTN0	664	672	CUL2	Cullin-2	98394000	45	1
283	FKITTSMQKDTPQEMEQTR	K	S	19	2	2298.1	A0A0A0MTN0;Q13617;Q13617-2	A0A0A0MTN0	664	682	CUL2	Cullin-2	11692000	45	1
293	FNPSISMIKK	R	C	10	1	1163.64	A0A0A0MTN0;Q13617;Q13617-2;Q5T2B5	A0A0A0MTN0	724	733	CUL2	Cullin-2	86660000	45	1
296	FSDIYALCVAYPEPLGER	R	L	18	0	2099	A0A0A0MTN0;Q13617;Q13617-2;Q5T2B5;B7Z1Y1;Q5T2B7	A0A0A0MTN0	52	69	CUL2	Cullin-2	430410000	45	5
305	FVQLINTVLNGDQHFMSALDK	K	A	21	0	2389.21	A0A0A0MTN0;Q13617;Q13617-2;Q5T2B5;B7Z1Y1	A0A0A0MTN0	363	383	CUL2	Cullin-2	12371000	45	1
310	FYQEIFESPFLTETGEYYK	K	Q	19	0	2390.1	A0A0A0MTN0;Q13617;Q13617-2;Q5T2B5;B7Z1Y1	A0A0A0MTN0	215	233	CUL2	Cullin-2	115790000	45	2
311	FYQEIFESPFLTETGEYYKQEASNLLQESNCSQYMEK	K	V	37	1	4530.02	A0A0A0MTN0;Q13617;Q13617-2;Q5T2B5;B7Z1Y1	A0A0A0MTN0	215	251	CUL2	Cullin-2	142880000	45	2
312	GADYMDCLYR	K	Y	10	0	1262.51	A0A0A0MTN0;Q13617;Q13617-2;Q5T2B5	A0A0A0MTN0	110	119	CUL2	Cullin-2	268170000	45	4
325	GGEDPNQKVIHGVINSFVHVEQYK	R	K	24	1	2693.36	A0A0A0MTN0;Q13617;Q13617-2;Q5T2B5;B7Z1Y1	A0A0A0MTN0	185	208	CUL2	Cullin-2	50481000	45	2
346	GMTENEVEDR	K	L	10	0	1178.49	A0A0A0MTN0;Q13617;Q13617-2;Q5T2B5;B7Z1Y1	A0A0A0MTN0	418	427	CUL2	Cullin-2	18327000	45	1
347	GMTENEVEDRLTSFITVFK	K	Y	19	1	2215.08	A0A0A0MTN0;Q13617;Q13617-2;Q5T2B5;B7Z1Y1	A0A0A0MTN0	418	436	CUL2	Cullin-2	459520000	45	1
384	HNALIQEVISQSR	R	A	13	0	1493.8	A0A0A0MTN0;Q13617;Q13617-2	A0A0A0MTN0	709	721	CUL2	Cullin-2	440980000	45	5
408	IFLENHVR	K	H	8	0	1026.56	A0A0A0MTN0;Q13617;Q13617-2;Q5T2B5;B7Z1Y1;Q5T2B7	A0A0A0MTN0	76	83	CUL2	Cullin-2	154080000	45	1
456	ITTSMQKDTPQEMEQTR	K	S	17	1	2022.93	A0A0A0MTN0;Q13617;Q13617-2	A0A0A0MTN0	666	682	CUL2	Cullin-2	57949000	45	2
466	KCIEVLIDK	K	Q	9	1	1116.62	A0A0A0MTN0;Q13617;Q13617-2;Q5T2B5	A0A0A0MTN0	733	741	CUL2	Cullin-2	14806000	45	1
467	KCIEVLIDKQYIER	K	S	14	2	1805.97	A0A0A0MTN0;Q13617;Q13617-2;Q5T2B5	A0A0A0MTN0	733	746	CUL2	Cullin-2	5344600	45	1
492	KLMVEPLQAILIR	R	M	13	1	1522.93	A0A0A0MTN0;Q13617;Q13617-2;Q5T2B5	A0A0A0MTN0	162	174	CUL2	Cullin-2	254240000	45	3
493	KLTWLHYLCTGEVK	R	M	14	1	1746.91	A0A0A0MTN0;Q13617;Q13617-2;Q5T2B5;B7Z1Y1	A0A0A0MTN0	565	578	CUL2	Cullin-2	6620000	45	0
494	KMYLQAAIVR	R	I	10	1	1191.68	A0A0A0MTN0;Q13617;Q13617-2	A0A0A0MTN0	690	699	CUL2	Cullin-2	15774000	45	1
495	KNDMANMYVLLR	K	A	12	1	1466.74	A0A0A0MTN0;Q13617;Q13617-2;Q5T2B5;B7Z1Y1	A0A0A0MTN0	304	315	CUL2	Cullin-2	285990000	45	4
507	KYLHPSSYTK	R	V	10	1	1222.63	A0A0A0MTN0;Q13617;Q13617-2;Q5T2B5;B7Z1Y1	A0A0A0MTN0	265	274	CUL2	Cullin-2	73212000	45	6
553	LIHGLSMSMDSEEAMINK	R	L	18	0	2004.93	A0A0A0MTN0;Q13617;Q13617-2;Q5T2B5;B7Z1Y1	A0A0A0MTN0	456	473	CUL2	Cullin-2	371890000	45	5
554	LIHGLSMSMDSEEAMINKLK	R	Q	20	1	2246.11	A0A0A0MTN0;Q13617;Q13617-2;Q5T2B5;B7Z1Y1	A0A0A0MTN0	456	475	CUL2	Cullin-2	18055000	45	3
562	LKQACGYEFTSK	K	L	12	1	1430.69	A0A0A0MTN0;Q13617;Q13617-2;Q5T2B5;B7Z1Y1	A0A0A0MTN0	474	485	CUL2	Cullin-2	40876000	45	1
571	LMVEPLQAILIR	K	M	12	0	1394.83	A0A0A0MTN0;Q13617;Q13617-2;Q5T2B5	A0A0A0MTN0	163	174	CUL2	Cullin-2	169380000	45	2
592	LTEADLQYGYGGVDMNEPLMEIGELALDMWR	K	K	31	0	3528.63	A0A0A0MTN0;Q13617;Q13617-2;Q5T2B5	A0A0A0MTN0	131	161	CUL2	Cullin-2	233110000	45	2
594	LTSFITVFK	R	Y	9	0	1054.61	A0A0A0MTN0;Q13617;Q13617-2;Q5T2B5;B7Z1Y1	A0A0A0MTN0	428	436	CUL2	Cullin-2	383700000	45	2
596	LTWLHYLCTGEVK	K	M	13	0	1618.82	A0A0A0MTN0;Q13617;Q13617-2;Q5T2B5;B7Z1Y1	A0A0A0MTN0	566	578	CUL2	Cullin-2	8981500	45	2
632	MINHDSEKEDIDAESSFSLNMNFSSK	K	R	26	1	2974.3	A0A0A0MTN0;Q13617;Q13617-2;Q5T2B5	A0A0A0MTN0	635	660	CUL2	Cullin-2	5942800	45	2
653	MVADHLQFLHAECHNIIR	R	Q	18	0	2203.08	A0A0A0MTN0;Q13617;Q13617-2;Q5T2B5;B7Z1Y1	A0A0A0MTN0	283	300	CUL2	Cullin-2	611880000	45	11
654	MVADHLQFLHAECHNIIRQEK	R	K	21	1	2588.27	A0A0A0MTN0;Q13617;Q13617-2;Q5T2B5;B7Z1Y1	A0A0A0MTN0	283	303	CUL2	Cullin-2	9600900	45	2
659	MYLQAAIVR	K	I	9	0	1063.58	A0A0A0MTN0;Q13617;Q13617-2	A0A0A0MTN0	691	699	CUL2	Cullin-2	196220000	45	2
660	MYTDMSVSADLNNK	R	F	14	0	1587.69	A0A0A0MTN0;Q13617;Q13617-2;Q5T2B5;B7Z1Y1	A0A0A0MTN0	489	502	CUL2	Cullin-2	8661800	45	1
661	MYTDMSVSADLNNKFNNFIK	R	N	20	1	2351.09	A0A0A0MTN0;Q13617;Q13617-2;Q5T2B5;B7Z1Y1	A0A0A0MTN0	489	508	CUL2	Cullin-2	25280000	45	1
666	NDMANMYVLLR	K	A	11	0	1338.64	A0A0A0MTN0;Q13617;Q13617-2;Q5T2B5;B7Z1Y1	A0A0A0MTN0	305	315	CUL2	Cullin-2	39918000	45	1
672	NKLTEADLQYGYGGVDMNEPLMEIGELALDMWR	K	K	33	1	3770.76	A0A0A0MTN0;Q13617;Q13617-2;Q5T2B5	A0A0A0MTN0	129	161	CUL2	Cullin-2	247700000	45	2
719	QACGYEFTSK	K	L	10	0	1189.51	A0A0A0MTN0;Q13617;Q13617-2;Q5T2B5;B7Z1Y1	A0A0A0MTN0	476	485	CUL2	Cullin-2	279190000	45	1
722	QEASNLLQESNCSQYMEK	K	V	18	0	2157.93	A0A0A0MTN0;Q13617;Q13617-2;Q5T2B5;B7Z1Y1	A0A0A0MTN0	234	251	CUL2	Cullin-2	164820000	45	3
773	RLIHGLSMSMDSEEAMINK	K	L	19	1	2161.03	A0A0A0MTN0;Q13617;Q13617-2;Q5T2B5;B7Z1Y1	A0A0A0MTN0	455	473	CUL2	Cullin-2	76343000	45	5
774	RLIHGLSMSMDSEEAMINKLK	K	Q	21	2	2402.21	A0A0A0MTN0;Q13617;Q13617-2;Q5T2B5;B7Z1Y1	A0A0A0MTN0	455	475	CUL2	Cullin-2	2052200	45	1
785	RVLESEEQVLVMYHR	K	Y	15	1	1886.97	A0A0A0MTN0;Q13617;Q13617-2;Q5T2B5;B7Z1Y1	A0A0A0MTN0	88	102	CUL2	Cullin-2	18670000	45	1
790	SAVDEDRKMYLQAAIVR	R	I	17	2	1964.01	A0A0A0MTN0;Q13617;Q13617-2	A0A0A0MTN0	683	699	CUL2	Cullin-2	25901000	45	2
854	SQASADEYSYVA	R	-	12	0	1289.54	A0A0A0MTN0;Q13617;Q13617-2;Q5T2B5	A0A0A0MTN0	747	758	CUL2	Cullin-2	172420000	45	1
876	SVCKAPELLAK	K	Y	11	1	1214.67	A0A0A0MTN0;Q13617;Q13617-2;Q5T2B5;B7Z1Y1	A0A0A0MTN0	396	406	CUL2	Cullin-2	481270000	45	3
882	SVQMFELFYSQHFSGR	K	K	16	0	1961.91	A0A0A0MTN0;Q13617;Q13617-2;Q5T2B5;B7Z1Y1	A0A0A0MTN0	549	564	CUL2	Cullin-2	17898000	45	1
998	VIHGVINSFVHVEQYK	K	K	16	0	1867.99	A0A0A0MTN0;Q13617;Q13617-2;Q5T2B5;B7Z1Y1	A0A0A0MTN0	193	208	CUL2	Cullin-2	361410000	45	8
999	VIHGVINSFVHVEQYKK	K	K	17	1	1996.09	A0A0A0MTN0;Q13617;Q13617-2;Q5T2B5;B7Z1Y1	A0A0A0MTN0	193	209	CUL2	Cullin-2	45859000	45	4
1006	VLESEEQVLVMYHR	R	Y	14	0	1730.87	A0A0A0MTN0;Q13617;Q13617-2;Q5T2B5;B7Z1Y1	A0A0A0MTN0	89	102	CUL2	Cullin-2	417700000	45	7
1041	VVDFDETWNK	R	L	10	0	1251.58	A0A0A0MTN0;Q13617;Q13617-2;Q5T2B5;B7Z1Y1;Q5T2B7	A0A0A0MTN0	20	29	CUL2	Cullin-2	390940000	45	3
1058	YCDNLLKK	K	S	8	1	1052.53	A0A0A0MTN0;Q13617;Q13617-2;Q5T2B5;B7Z1Y1	A0A0A0MTN0	407	414	CUL2	Cullin-2	656960000	45	2
1072	YIDDKDVFQK	K	F	10	1	1269.62	A0A0A0MTN0;Q13617;Q13617-2;Q5T2B5;B7Z1Y1	A0A0A0MTN0	437	446	CUL2	Cullin-2	708580000	45	3
1073	YIDDKDVFQKFYAR	K	M	14	2	1806.89	A0A0A0MTN0;Q13617;Q13617-2;Q5T2B5;B7Z1Y1	A0A0A0MTN0	437	450	CUL2	Cullin-2	10800000	45	2
1080	YLHPSSYTK	K	V	9	0	1094.54	A0A0A0MTN0;Q13617;Q13617-2;Q5T2B5;B7Z1Y1	A0A0A0MTN0	266	274	CUL2	Cullin-2	289860000	45	2
1081	YLNTQFIKK	R	N	9	1	1153.65	A0A0A0MTN0;Q13617;Q13617-2;Q5T2B5	A0A0A0MTN0	120	128	CUL2	Cullin-2	129380000	45	1
1099	YWEEYSKGADYMDCLYR	R	Y	17	1	2247.92	A0A0A0MTN0;Q13617;Q13617-2;Q5T2B5	A0A0A0MTN0	103	119	CUL2	Cullin-2	50172000	45	3
815	SGYRIDFYFDENPYFENK	K	V	18	1	2303.02	A0A0C4DFV9;B2RCX0;A0A024R895;Q5VXV3;A0A087X027;Q01105-3;Q01105-4;Q01105-2;Q01105;P0DME0	A0A0C4DFV9	109	126	SET;SETSIP	Protein SET;Protein SETSIP	1544200	25	1
984	VEVTEFEDIK	R	S	10	0	1207.6	A0A0C4DFV9;B2RCX0;A0A024R895;Q5VXV3;A0A087X027;Q01105-3;Q01105-4;Q01105-2;Q01105;P0DME0	A0A0C4DFV9	99	108	SET;SETSIP	Protein SET;Protein SETSIP	5404900	25	1
716	PWKSQQPK	K	K	8	1	997.535	A0A0C4DG37;Q8NDP4	A0A0C4DG37	21	28	ZNF439	Zinc finger protein 439	17988000	48	1
322	GFGFVTFENSADADR	K	A	15	0	1631.72	A0A0G2JSB3;I3L1D4;B0QYY7;A0A0G2JRD1;S4R3K7;S4R469;Q8TCM0;F8VR27;F8VZY7;Q59HD3;B0QYV1;X5DP44;B7ZLH9;B0QYY4;A0A087X2B1;A0A0G2JRA5;F8WSN4;X5D7T5;J3KNW3;X5DNY3;B7Z1U7;F8VZG9;O43251-9;Q9NWB1-3;O43251-4;O43251-5;O43251-10;O43251-2;O43251;Q9NWB1-4;Q9NWB1-5;Q9NWB1;O43251-7;Q9NWB1-2;O43251-6;O43251-8	A0A0G2JSB3	160	174	RBFOX1;RBFOX2;DKFZp547L059;A2BP1	RNA binding protein fox-1 homolog;RNA binding protein fox-1 homolog 2;RNA binding protein fox-1 homolog 1	467550	44	1
718	QAASSLQQASLK	R	L	12	0	1230.66	A1XP52;B7Z4T3;B7Z4V2;V9HW84;Q8N1C8;P38646	A1XP52	306	317	HEL-S-124m;HSPA9	Stress-70 protein, mitochondrial	1837900	54	1
129	CPQIVIAFYEER	K	L	12	0	1523.74	A4D177;Q13185;V9HWG0;Q6I9T7;P45973	A4D177	160	171	CBX3;HEL25;CBX5	Chromobox protein homolog 3;Chromobox protein homolog 5	1709400	56	1
418	IIGATDSSGELMFLMK	R	W	16	0	1711.85	A4D177;Q13185;K7ELA4;B5MD17;J3KS05;Q6IBN6;P83916	A4D177	126	141	CBX3;CBX1	Chromobox protein homolog 3;Chromobox protein homolog 1	2449800	56;90	1
1050	WKDSDEADLVLAK	K	E	13	1	1488.75	A4D177;Q13185	A4D177	142	154	CBX3	Chromobox protein homolog 3	1671200	56	1
281	FITHAPPGEFNEVFNDVR	K	L	18	0	2088.01	A8K0T9;A0A024R0E5;P52907	A8K0T9	20	37	CAPZA1	F-actin-capping protein subunit alpha-1	864420	2	1
376	HHNQPYCGIAPYIR	K	E	14	0	1724.82	A8KAQ5;A0A024QZD5;P08621-3;P08621-2;P08621	A8KAQ5	33	46	SNRP70;SNRNP70	U1 small nuclear ribonucleoprotein 70 kDa	0	0	1
198	DVAWAPSIGLPTSTIASCSQDGR	R	V	23	0	2388.14	A8MXL6;Q59FA6;A0A0C4DFR6;P55735-2;P55735;P55735-3	A8MXL6	203	225	SEC13	Protein SEC13 homolog	1915900	47	1
190	DSFDDRGPSLNPVLDYDHGSR	R	S	21	1	2361.06	A8MXP9;P43243;D6R991;D6REM6	A8MXP9	187	207	MATR3	Matrin-3	6700900	64	2
524	LCSLFYTNEEVAK	K	N	13	0	1572.75	A8MXP9;P43243;Q68E03;Q9H4N1;Q5CZA7;B4DF66;B3KM87;B4DRS1;Q68D11;P43243-2	A8MXP9	853	865	MATR3;DKFZp686L22104;DKFZp686K0542;DKFZp686K23100	Matrin-3	2476600	64	1
83	AREGSEEDLDALEHMFR	K	Q	17	1	2003.9	B2CIS9;A9UFC0;P31944	B2CIS9	28	44	CASP14	Caspase-14;Caspase-14 subunit p19;Caspase-14 subunit p10	1680000	65	1
128	CPLCQQDWVVQR	R	I	12	0	1587.73	B2R4X4;Q9UBF6;Q9UBF6-4	B2R4X4	99	110	RNF7	RING-box protein 2	4787400	66	1
1028	VQVMDACLR	R	C	9	0	1090.53	B2R4X4;Q9UBF6	B2R4X4	55	63	RNF7	RING-box protein 2	0	66	1
87	ASEAGEVPFNHEILR	K	E	15	0	1667.83	B2R514;E7EM64;Q7L5N1	B2R514	214	228	COPS6	COP9 signalosome complex subunit 6	9791100	67	1
213	EAYALCHCLPVLSTDK	R	F	16	0	1875.89	B2R514;E7EM64;Q7L5N1	B2R514	229	244	COPS6	COP9 signalosome complex subunit 6	14891000	67	2
214	EAYALCHCLPVLSTDKFK	R	T	18	1	2151.05	B2R514;E7EM64;Q7L5N1	B2R514	229	246	COPS6	COP9 signalosome complex subunit 6	17607000	67	2
419	IIIDKEYYYTKEEQFK	K	Q	16	2	2109.07	B2R514;E7EM64;Q7L5N1	B2R514	68	83	COPS6	COP9 signalosome complex subunit 6	31633000	67	3
557	LILEYVK	K	A	7	0	876.532	B2R514;E7EM64;Q7L5N1	B2R514	207	213	COPS6	COP9 signalosome complex subunit 6	1290400	67	1
650	MTATGSGENSTVAEHLIAQHSAIK	R	M	24	0	2452.2	B2R514;E7EM64;Q7L5N1;H7C3T0	B2R514	176	199	COPS6	COP9 signalosome complex subunit 6	52880000	67	3
670	NIEVMNSFELLSHTVEEK	R	I	18	0	2118.03	B2R514;E7EM64;Q7L5N1;B4DHR8	B2R514	50	67	COPS6	COP9 signalosome complex subunit 6	56226000	67	2
754	QVCEIIESPLFLK	K	L	13	0	1574.84	B2R514;E7EM64;Q7L5N1;H7C3T0	B2R514	111	123	COPS6	COP9 signalosome complex subunit 6	36245000	67	1
758	QVFKELEFLGWYTTGGPPDPSDIHVHK	K	Q	27	1	3096.53	B2R514;E7EM64;Q7L5N1	B2R514	84	110	COPS6	COP9 signalosome complex subunit 6	14225000	67	1
855	SQEGRPVQVIGALIGK	R	Q	16	1	1650.94	B2R514;E7EM64;Q7L5N1;B4DHR8	B2R514	30	45	COPS6	COP9 signalosome complex subunit 6	6295600	67	1
856	SQEGRPVQVIGALIGKQEGR	R	N	20	2	2121.17	B2R514;E7EM64;Q7L5N1;B4DHR8	B2R514	30	49	COPS6	COP9 signalosome complex subunit 6	9805000	67	1
320	GDGVVLVAPPLR	R	V	12	0	1191.7	B2R5H5;P62310	B2R5H5	89	100	LSM3	U6 snRNA-associated Sm-like protein LSm3	4064600	68	1
10	AASAAAASAAAASAASGSPGPGEGSAGGEKR	M	S	31	1	2542.2	B2R8R5;Q13263;Q13263-2	B2R8R5	2	32	TRIM28	Transcription intermediary factor 1-beta	0	70	1
170	DIVENYFMR	K	D	9	0	1185.55	B2R8R5;Q13263;M0R2I3	B2R8R5	128	136	TRIM28	Transcription intermediary factor 1-beta	2487400	70	1
367	HEPLVLFCESCDTLTCR	K	D	17	0	2135.94	B2R8R5;Q13263;Q13263-2;M0R2I3;M0R3C0	B2R8R5	214	230	TRIM28	Transcription intermediary factor 1-beta	1458300	70	1
593	LTEDKADVQSIIGLQR	K	F	16	1	1784.96	B2R8R5;Q13263;Q13263-2;M0R0K9	B2R8R5	775	790	TRIM28	Transcription intermediary factor 1-beta	3046500	70	1
839	SNEILTAIIQGMR	K	K	13	0	1444.77	B2RBR9;Q14974;J3QRG4;B7Z5M1;J3KTM9;B7Z752;Q14974-2	B2RBR9	170	182	KPNB1	Importin subunit beta-1	944560	72	1
1051	WLAIDANAR	R	R	9	0	1028.54	B2RBR9;Q14974;J3QR48	B2RBR9	80	88	KPNB1	Importin subunit beta-1	0	72	1
689	NQDDFECVTTLEGHENEVK	K	S	19	0	2262.97	B2RDJ6;O76071	B2RDJ6	91	109	CIAO1	Probable cytosolic iron-sulfur protein assembly protein CIAO1	3851400	73	1
445	IRCEEEDVEMSEDAYTVLTR	R	I	20	1	2444.08	B3KNL2;Q9Y230-2;Q9Y230	B3KNL2	339	358	RUVBL2	RuvB-like 2	2080100	77	1
938	TQGFLALFSGDTGEIK	R	S	16	0	1682.85	B3KNL2;Q9Y230-2;Q9Y230;M0R0Y3	B3KNL2	220	235	RUVBL2	RuvB-like 2	2332100	77	1
939	TQGFLALFSGDTGEIKSEVR	R	E	20	1	2154.1	B3KNL2;Q9Y230-2;Q9Y230;M0R0Y3	B3KNL2	220	239	RUVBL2	RuvB-like 2	1973900	77	2
947	TTEMETIYDLGTK	K	M	13	0	1500.7	B3KNL2;Q9Y230-2;Q9Y230;M0R0Y3;B4DW30;X6R2L4	B3KNL2	131	143	RUVBL2	RuvB-like 2	3700500	77	0
122	CHDYYTTEFLYNLYSSEGK	K	G	19	0	2389.02	B3KNQ7;Q9BSP4;Q7L2M7;P17858;P17858-2;Q59GI2	B3KNQ7	217	235	PFKL	ATP-dependent 6-phosphofructokinase, liver type	1611800	78	1
355	GQVQEVGWHDVAGWLGR	K	G	17	0	1892.93	B3KNQ7;Q9BSP4;Q7L2M7;P17858;P17858-2;Q59GI2;Q7Z3R9;Q6MZK4	B3KNQ7	32	48	PFKL;DKFZp686G1648;DKFZp686L2097	ATP-dependent 6-phosphofructokinase, liver type	4429500	78	1
929	TNVLGHLQQGGAPTPFDR	R	N	18	0	1906.96	B3KNQ7;Q9BSP4;Q7L2M7;P17858;P17858-2	B3KNQ7	242	259	PFKL	ATP-dependent 6-phosphofructokinase, liver type	1138500	78	1
49	AIDENNEPTACFLIR	R	S	15	0	1761.84	B3KPZ0;Q9P2R3;Q9P2R3-2;Q9P2R3-4;Q5H9P4	B3KPZ0	674	688	ANKFY1;DKFZp686M19106	Ankyrin repeat and FYVE domain-containing protein 1	3982500	80	1
356	GSHTDAPDTATGNCLLQR	R	A	18	0	1912.87	B3KPZ0;Q9P2R3;Q9P2R3-2;Q9P2R3-4;Q5H9P4	B3KPZ0	388	405	ANKFY1;DKFZp686M19106	Ankyrin repeat and FYVE domain-containing protein 1	5229600	80	1
369	HGCDATCWGPGPGGCLQTLLHR	R	A	22	0	2449.08	B3KPZ0;Q9P2R3;Q9P2R3-2;Q9P2R3-4	B3KPZ0	652	673	ANKFY1	Ankyrin repeat and FYVE domain-containing protein 1	1505600	80	1
371	HGLANLTAELLQQGANPNLQTEEALPLPK	R	E	29	0	3079.63	B3KPZ0;Q9P2R3;Q9P2R3-2;Q9P2R3-4;Q5H9P4	B3KPZ0	442	470	ANKFY1;DKFZp686M19106	Ankyrin repeat and FYVE domain-containing protein 1	6102300	80	1
691	NQLPLVVDAICTR	R	G	13	0	1497.8	B3KPZ0;Q9P2R3;Q9P2R3-2;Q9P2R3-4;Q5H9P4	B3KPZ0	607	619	ANKFY1;DKFZp686M19106	Ankyrin repeat and FYVE domain-containing protein 1	2386700	80	1
725	QGLTPFACAMTFK	R	N	13	0	1470.7	B3KPZ0;Q9P2R3;Q9P2R3-2;Q9P2R3-4;Q5H9P4	B3KPZ0	778	790	ANKFY1;DKFZp686M19106	Ankyrin repeat and FYVE domain-containing protein 1	1405100	80	1
937	TQDGETALQLAIR	R	N	13	0	1414.74	B3KPZ0;Q9P2R3;Q9P2R3-2;Q9P2R3-4;Q5H9P4	B3KPZ0	594	606	ANKFY1;DKFZp686M19106	Ankyrin repeat and FYVE domain-containing protein 1	1745900	80	1
43	AHQLVMEGYNWCHDR	R	N	15	0	1914.83	B3KQ51;Q8WZ56;Q5U0I7;B3KUN1;B3KRM2;P67775;P62714;H0YC23;Q6I9T8	B3KQ51	175	189	PPP2CA;PPP2CB	Serine/threonine-protein phosphatase;Serine/threonine-protein phosphatase 2A catalytic subunit alpha isoform;Serine/threonine-protein phosphatase 2A catalytic subunit beta isoform	4453700	81	1
578	LQEVPHEGPMCDLLWSDPDDR	R	G	21	0	2508.11	B3KQ51;Q8WZ56;Q5U0I7;B3KUN1;B3KRM2;P67775;P62714;H0YC23;E5RHC1	B3KQ51	121	141	PPP2CA;PPP2CB	Serine/threonine-protein phosphatase;Serine/threonine-protein phosphatase 2A catalytic subunit alpha isoform;Serine/threonine-protein phosphatase 2A catalytic subunit beta isoform	4898000	81	1
707	NVVTIFSAPNYCYR	R	C	14	0	1702.81	B3KQ51;Q8WZ56;Q5U0I7;B3KUN1;B3KRM2;P67775;P62714;H0YC23;Q6I9T8;P67775-2	B3KQ51	190	203	PPP2CA;PPP2CB	Serine/threonine-protein phosphatase;Serine/threonine-protein phosphatase 2A catalytic subunit alpha isoform;Serine/threonine-protein phosphatase 2A catalytic subunit beta isoform	3262400	81	1
845	SPDTNYLFMGDYVDR	K	G	15	0	1791.78	B3KQ51;Q8WZ56;Q5U0I7;B3KUN1;B3KRM2;P67775;P62714;Q6I9T8;E5RHC1;P67775-2;E5RFI3;E5RHP4;E7ESG8;B7Z2C5	B3KQ51	10	24	PPP2CA;PPP2CB	Serine/threonine-protein phosphatase;Serine/threonine-protein phosphatase 2A catalytic subunit alpha isoform;Serine/threonine-protein phosphatase 2A catalytic subunit beta isoform	1921700	81	1
159	DGALHMIGSLAEILLK	K	K	16	0	1679.93	B3KQG6;O95373	B3KQG6	114	129	IPO7	Importin-7	19402000	82	1
284	FLAVGLVDNTVR	R	I	12	0	1302.73	B3KQH1;A8K6V3;Q15393	B3KQH1	284	295	SF3B3	Splicing factor 3B subunit 3	1068000	62	1
32	AFVHWYVGEGMEEGEFSEAR	R	E	20	0	2329.01	Q53GA7;F5H5D3;B7Z1K5;Q9BQE3;P68366-2;P68366;B4DDU2;Q15670;B3KT06;B3KPS3;P68363;A8JZY9;P68363-2	B3KT06	368	387	TUBA1C;TUBA4A;TUBA1B	Tubulin alpha-1C chain;Tubulin alpha-4A chain;Tubulin alpha-1B chain	12205000	79;91;164	0
101	AVCMLSNTTAIAEAWAR	R	L	17	0	1863.9	P68366-2;P68366;B4DDU2;Q15670;B3KT06;B3KPS3;P68363;A8JZY9;P68363-2	B3KT06	339	355	TUBA4A;TUBA1B	Tubulin alpha-4A chain;Tubulin alpha-1B chain	17209000	79;164	1
106	AVFVDLEPTVIDEVR	R	T	15	0	1700.9	Q53GA7;F5H5D3;B7Z1K5;Q9BQE3;Q8N532;F8VVB9;F8VQQ4;F8VRZ4;F8VS66;F8VX09;F8VWV9;F8VRK0;B3KT06;B3KPS3;P68363;A8JZY9;P68363-2	B3KT06	30	44	TUBA1C;KLK9;TUBA1A;TUBA1B	Tubulin alpha-1C chain;Tubulin alpha-1B chain	646170000	79;91	5
117	AYHEQLSVAEITNACFEPANQMVK	K	C	24	0	2749.28	P68366-2;P68366;B4DDU2;C9JDS9;B3KT06;B3KPS3;P68363;A8JZY9;P68363-2	B3KT06	246	269	TUBA4A;TUBA1B	Tubulin alpha-4A chain;Tubulin alpha-1B chain	155320000	79;164	3
275	FDGALNVDLTEFQTNLVPYPR	R	I	21	0	2408.2	Q53GA7;F5H5D3;B7Z1K5;Q9BQE3;F8VVB9;P68366-2;P68366;B4DDU2;C9JDS9;B3KT06;B3KPS3;P68363;A8JZY9;P68363-2	B3KT06	209	229	TUBA1C;KLK9;TUBA4A;TUBA1B	Tubulin alpha-1C chain;Tubulin alpha-4A chain;Tubulin alpha-1B chain	4813900	79;91;164	0
333	GHYTIGKEIIDLVLDR	R	I	16	1	1841	Q53GA7;F5H5D3;B7Z1K5;Q9BQE3;Q8N532;F8VVB9;F8VQQ4;F8VRZ4;F8VS66;B3KT06;B3KPS3;P68363;A8JZY9	B3KT06	71	86	TUBA1C;KLK9;TUBA1A;TUBA1B	Tubulin alpha-1C chain;Tubulin alpha-1B chain	1224800	79;91	1
414	IHFPLATYAPVISAEK	R	A	16	0	1755.96	Q53GA7;F5H5D3;B7Z1K5;Q9BQE3;F8VVB9;P68366-2;P68366;B4DDU2;C9JDS9;B3KT06;B3KPS3;P68363;P68363-2	B3KT06	230	245	TUBA1C;KLK9;TUBA4A;TUBA1B	Tubulin alpha-1C chain;Tubulin alpha-4A chain;Tubulin alpha-1B chain	51451000	79;91;164	3
526	LDHKFDLMYAK	R	R	11	1	1379.69	Q53GA7;F5H5D3;B7Z1K5;Q9BQE3;A6NHL2-2;A6NHL2;P68366-2;P68366;B4DDU2;Q15670;B3KT06;B3KPS3;P68363;A8JZY9;P68363-2	B3KT06	356	366	TUBA1C;TUBAL3;TUBA4A;TUBA1B	Tubulin alpha-1C chain;Tubulin alpha chain-like 3;Tubulin alpha-4A chain;Tubulin alpha-1B chain	36528000	79;91;164	2
590	LSVDYGKK	R	S	8	1	908.497	Q53GA7;F5H5D3;B7Z1K5;Q9BQE3;F8VQQ4;D3DX41;P68366-2;P68366;B4DDU2;C9JEV8;C9JDS9;C9JQ00;C9JJQ8;B3KT06;B3KPS3;P68363;A8JZY9	B3KT06	122	129	TUBA1C;TUBA1A;MGC16703;TUBA4A;TUBA1B	Tubulin alpha-1C chain;Tubulin alpha-4A chain;Tubulin alpha-1B chain	27618000	79;91;164	1
734	QLFHPEQLITGKEDAANNYAR	R	G	21	1	2414.2	Q53GA7;F5H5D3;B7Z1K5;Q9BQE3;Q8N532;F8VVB9;F8VQQ4;F8VRZ4;F8VS66;F8VX09;F8VWV9;C9K0S6;Q6QMJ5;P68366-2;P68366;C9JEV8;C9JQ00;C9JJQ8;C9JDL2;B3KT06;B3KPS3;P68363;A8JZY9;P68363-2	B3KT06	50	70	TUBA1C;KLK9;TUBA1A;TUBA8;TUBA1;TUBA4A;TUBA1B	Tubulin alpha-1C chain;Tubulin alpha-4A chain;Tubulin alpha-1B chain	56813000	79;91;164	1
781	RSIQFVDWCPTGFK	K	V	14	1	1739.85	P68366-2;P68366;B4DDU2;B3KT06;B3KPS3;P68363;A8JZY9;P68363-2	B3KT06	304	317	TUBA4A;TUBA1B	Tubulin alpha-4A chain;Tubulin alpha-1B chain	5366900	79;164	2
824	SIQFVDWCPTGFK	R	V	13	0	1583.74	P68366-2;P68366;B4DDU2;B3KT06;B3KPS3;P68363;A8JZY9;P68363-2	B3KT06	305	317	TUBA4A;TUBA1B	Tubulin alpha-4A chain;Tubulin alpha-1B chain	80198000	79;164	2
908	TIGGGDDSFNTFFSETGAGK	K	H	20	0	2006.89	Q53GA7;F5H5D3;B7Z1K5;Q9BQE3;Q8N532;F8VVB9;F8VQQ4;F8VRZ4;F8VS66;F8VX09;F8VWV9;F8VRK0;F8W0F6;F8VXZ7;B3KT06;B3KPS3;P68363;A8JZY9;P68363-2	B3KT06	6	25	TUBA1C;KLK9;TUBA1A;TUBA1B	Tubulin alpha-1C chain;Tubulin alpha-1B chain	303050000	79;91	2
909	TIGGGDDSFNTFFSETGAGKHVPR	K	A	24	1	2496.17	Q53GA7;F5H5D3;B7Z1K5;Q9BQE3;Q8N532;F8VVB9;F8VQQ4;F8VRZ4;F8VS66;F8VX09;F8VWV9;F8VRK0;F8W0F6;B3KT06;B3KPS3;P68363;A8JZY9;P68363-2	B3KT06	6	29	TUBA1C;KLK9;TUBA1A;TUBA1B	Tubulin alpha-1C chain;Tubulin alpha-1B chain	7008800	79;91	1
988	VGINYQPPTVVPGGDLAK	K	V	18	0	1823.98	Q53GA7;F5H5D3;B7Z1K5;Q9BQE3;Q8N532;P68366-2;P68366;B4DDU2;B3KT06;B3KPS3;P68363;A8JZY9;P68363-2	B3KT06	318	335	TUBA1C;TUBA4A;TUBA1B	Tubulin alpha-1C chain;Tubulin alpha-4A chain;Tubulin alpha-1B chain	114280000	79;91;164	1
1083	YMACCLLYR	K	G	9	0	1248.55	Q53GA7;F5H5D3;B7Z1K5;Q9BQE3;Q8N532;A6NHL2-2;A6NHL2;P68366-2;P68366;B4DDU2;B3KT06;B3KPS3;P68363;A8JZY9;P68363-2	B3KT06	277	285	TUBA1C;TUBAL3;TUBA4A;TUBA1B	Tubulin alpha-1C chain;Tubulin alpha chain-like 3;Tubulin alpha-4A chain;Tubulin alpha-1B chain	122160000	79;91;164	2
1084	YMACCLLYRGDVVPK	K	D	15	1	1843.88	Q53GA7;F5H5D3;B7Z1K5;Q9BQE3;Q8N532;A6NHL2-2;A6NHL2;P68366-2;P68366;B4DDU2;B3KT06;B3KPS3;P68363;A8JZY9;P68363-2	B3KT06	277	291	TUBA1C;TUBAL3;TUBA4A;TUBA1B	Tubulin alpha-1C chain;Tubulin alpha chain-like 3;Tubulin alpha-4A chain;Tubulin alpha-1B chain	17424000	79;91;164	1
358	GSPEEELPLPAFEK	R	L	14	0	1541.76	B3KT40;A0A024RD56;Q5JTD0-4;Q5JTD0-2;Q5JTD0	B3KT40	165	178	TJAP1	Tight junction-associated protein 1	18332000	32	1
328	GHKEKGVVMQCSHLILK	R	P	17	2	1963.05	B3KXW2;A0A024R283;Q9HCE3	B3KXW2	667	683	ZNF532	Zinc finger protein 532	1566900000	7	1
563	LLDRNQDETEDTELQGMNEYLSSFK	R	V	25	1	2974.35	B3KY63;F5GWX5;A0A0C4DGG9;Q14839;Q14839-2	B3KY63	1231	1255	CHD4	Chromodomain-helicase-DNA-binding protein 4	3734800	49	1
887	TAFDDAIAELDTLNEDSYKDSTLIMQLLR	K	D	29	1	3300.61	B4DE78;B3KNB4;P61981;B4DHC4	B4DE78	159	187	YWHAG	14-3-3 protein gamma;14-3-3 protein gamma, N-terminally processed	16213000	76	1
976	VDREQLVQK	M	A	9	1	1113.61	B4DE78;B3KNB4;P61981	B4DE78	2	10	YWHAG	14-3-3 protein gamma;14-3-3 protein gamma, N-terminally processed	4736400	76	1
381	HLLQAPVDDAQEILHSR	R	F	17	0	1941.01	B4DF60;F5H365;B4DSQ5;Q15436-2;Q15436	B4DF60	581	597	SEC23A	Protein transport protein Sec23A	1522600	84	1
479	KFGDPVVQSDMK	R	H	12	1	1349.66	B4DFN9;P0DMV8-2;P0DMV9;P0DMV8;A8K5I0;A0A0G2JIW1;Q59EJ3;B4DNX1;B4E388;B4DNT8	B4DFN9	77	88	HEL-S-103		590580	51	0
19	ADQLTEEQIAEFK	M	E	13	0	1520.74	B4DJ51;B2RDW0;H0Y7A7;P62158;Q9BRL5;M0QZ52;F8WBR5;G3V479	B4DJ51	2	14	CALM1;CALM2;CALM3	Calmodulin	18916000	74	1
20	ADQLTEEQIAEFKEAFSLFDKDGDGTITTK	M	E	30	2	3346.61	B4DJ51;B2RDW0;H0Y7A7;P62158;Q9BRL5;M0QZ52;F8WBR5;G3V479	B4DJ51	2	31	CALM1;CALM2;CALM3	Calmodulin	133510000	74	1
206	EADIDGDGQVNYEEFVQMMTAK	R	-	22	0	2489.07	B4DJ51;B2RDW0;H0Y7A7;P62158;M0QZ52;E7ETZ0;E7EMB3;Q96HY3;A8K1M2	B4DJ51	128	149	CALM1;CALM2;CALM3	Calmodulin	4571300	74	1
209	EAFSLFDKDGDGTITTK	K	E	17	1	1843.88	B4DJ51;B2RDW0;H0Y7A7;P62158;Q9BRL5;M0QZ52;E7ETZ0;E7EMB3;F8WBR5;G3V479;A8K1M2	B4DJ51	15	31	CALM1;CALM2;CALM3	Calmodulin	39908000	74	1
633	MKDTDSEEEIREAFR	K	V	15	2	1854.84	B4DJ51;B2RDW0;H0Y7A7;P62158;Q9BRL5;E7ETZ0;E7EMB3;Q96HY3;A8K1M2;G3V361;G3V226	B4DJ51	77	91	CALM1;CALM2;CALM3	Calmodulin	13499000	74	2
986	VFDKDGNGYISAAELR	R	H	16	1	1753.86	B4DJ51;B2RDW0;H0Y7A7;P62158;Q9BRL5;E7ETZ0;E7EMB3;Q96HY3;G3V361	B4DJ51	92	107	CALM1;CALM2;CALM3	Calmodulin	6970200	74	1
385	HNQLPLVIEFTEQTAPK	K	I	17	0	1964.04	B4DLN6;B4DUA5;H7BZ94;B4DNL5;A0A024R8S5;P07237;I3L4M2;I3NI03;I3L398;I3L312	B4DLN6	174	190	P4HB	Protein disulfide-isomerase	1161200	26	1
428	ILFIFIDSDHTDNQR	K	I	15	0	1832.91	B4DLN6;B4DUA5;H7BZ94;B4DNL5;A0A024R8S5;P07237;I3L4M2;I3L398;Q96C96;H0Y3Z3	B4DLN6	229	243	P4HB	Protein disulfide-isomerase	1250300	26	1
971	VDATEESDLAQQYGVR	K	G	16	0	1779.83	B4DLN6;B4DUA5;H7BZ94;B4DNL5;A0A024R8S5;P07237;I3NI03;I3L3U6;B4DNP9;B4DJS0	B4DLN6	82	97	P4HB	Protein disulfide-isomerase	2399200	26	1
829	SKSEMQVK	M	E	8	1	935.475	B4DX58	B4DX58	2	9			0	86	1
888	TAFDEAIAELDTLNEDSYKDSTLIMQLLR	K	D	29	1	3314.62	B4DY04;Q53S41;B4DMT8;P27348	B4DY04	74	102	YWHAQ	14-3-3 protein theta	4045100	85	1
110	AVLLAGPPGTGK	R	T	12	0	1079.63	B5BUB1;Q9Y265-2;Q9Y265;E7ETR0;B3KRS7	B5BUB1	65	76	RUVBL1	RuvB-like 1	0	89	1
339	GLGLDESGLAK	K	Q	11	0	1058.56	B5BUB1;Q9Y265-2;Q9Y265	B5BUB1	23	33	RUVBL1	RuvB-like 1	5244200	89	1
529	LDPSIFESLQK	K	E	11	0	1275.67	B5BUB1;Q9Y265-2;Q9Y265;E7ETR0;B3KRS7	B5BUB1	172	182	RUVBL1	RuvB-like 1	1788700	89	1
387	HQEPVYSVAFSPDGR	K	Y	15	0	1687.8	B7Z475;A0A0D9SF63;Q9BZK7	B7Z475	303	317	TBL1XR1	F-box-like/WD repeat-containing protein TBL1XR1	0	50	1
180	DMAIATGGAVFGEEGLTLNLEDVQPHDLGK	K	V	30	0	3096.51	B7Z532;B7Z5E7;B7Z4F6;B7Z597;B3GQS7;A0A024R3X4;P10809	B7Z532	171	200	HSPD1	60 kDa heat shock protein, mitochondrial	2774100	10	1
135	CVLNEGMPIYR	K	R	11	0	1350.64	B7Z5C0;Q9NXZ8;P31689-2;P31689	B7Z5C0	145	155	HDJ2;DNAJA1	DnaJ homolog subfamily A member 1	1178500	92	1
416	IHQIGPGMVQQIQSVCMECQGHGER	R	I	25	0	2878.31	B7Z5C0;Q9NXZ8;P31689-2;P31689	B7Z5C0	5	29	HDJ2;DNAJA1	DnaJ homolog subfamily A member 1	2563400	92	0
1091	YPIEHGIITNWDDMEK	K	I	16	0	1959.9	B7Z6P1;B3KW67;D2JYH4;A8K3K1;P63267;P68133;P68032;P62736;F8WB63;B8ZZJ2;C9JFL5;F6UVQ4;F6QUT6;B7Z6I1;Q7Z7J6;A6NL76;Q13707;B4DUI8	B7Z6P1	71	86	ACTA2;ACTG2;ACTA1;ACTC1	Actin, gamma-enteric smooth muscle;Actin, alpha skeletal muscle;Actin, alpha cardiac muscle 1;Actin, aortic smooth muscle	6141400	58	1
997	VIGQDSSEIHFK	K	V	12	0	1358.68	B8ZZJ0;B9A032;G2XKQ0;A0A024R3Z2;B8ZZN6;P63165	B8ZZJ0	26	37	SUMO1	Small ubiquitin-related modifier 1	1646200	11	1
585	LSPIENFLPLHYDYLQFAYYR	R	-	21	0	2661.33	C9J313;Q8IVL5-2;Q8IVL5	C9J313	117	137	LEPREL1	Prolyl 3-hydroxylase 2	21521000	95	1
183	DNMSIVLVCFSNAPK	R	V	15	0	1693.82	C9JIR6;A8K599;Q4J6C0;B3KP90;O75688-5;O75688-4;O75688-2;O75688	C9JIR6	286	300	PPM1B	Protein phosphatase 1B	1315700	60	1
816	SHSTEPGLVLTLGQGDVGQLGLGENVMER	R	K	29	0	2992.49	C9JRH2;C9JMJ4;C9J3R0;C9JQZ4;C9JW69;Q5T081;P18754;P18754-2	C9JRH2	29	57	RCC1	Regulator of chromosome condensation	4498700	96	1
169	DICNDVLSLLEK	R	F	12	0	1417.71	D0PNI1;E7EX29;P63104;E7ESK7;B0AZS6	D0PNI1	92	103	YWHAZ	14-3-3 protein zeta/delta	924510	109	1
515	LAEQAERYDDMAACMK	K	S	16	1	1900.81	D0PNI1;E7EX29;P63104;E7ESK7;E5RGE1;E5RIR4;E9PD24;E7EVZ2	D0PNI1	12	27	YWHAZ	14-3-3 protein zeta/delta	2085500	109	1
623	MDKNELVQK	-	A	9	1	1103.56	D0PNI1;E7EX29;P63104;E7ESK7;E5RGE1;E5RIR4;E9PD24;E7EVZ2	D0PNI1	1	9	YWHAZ	14-3-3 protein zeta/delta	7057000	109	1
889	TAFDEAIAELDTLSEESYKDSTLIMQLLR	K	D	29	1	3301.63	D0PNI1;E7EX29;P63104;B0AZS6;Q2F831;B7Z2E6;H0YB80;P63104-2	D0PNI1	194	222	YWHAZ	14-3-3 protein zeta/delta	3426100	109	1
176	DLQLSGFPVVGNLPSQPVK	K	N	19	0	1994.08	D4PHA4;Q86WP2-4;Q86WP2-3;Q86WP2;Q86WP2-2	D4PHA4	202	220	GPBP1	Vasculin	0	111	1
449	ISLQDLQ	K	-	7	0	815.439	D6RDM9	D6RDM9	69	75	ZNF518B		1179300	112	0
409	IFVGGLSPDTPEEK	K	I	14	0	1487.75	D6RF44;B4E0W4;H0YA96;D6RAF8;H0Y8G5;Q12771;B4DTC3;A0A024RDF4;A0A024RDB4;A0A024RDF3;Q14103-4;Q14103-3;Q14103-2;Q14103	D6RF44	86	99	HNRNPD;HNRPD	Heterogeneous nuclear ribonucleoprotein D0	3699600	34	1
82	AQTLPTSVVTITSESSPGKR	R	E	20	1	2058.1	D6W5C0;B2ZZ89;A0A087WUZ3;Q01082;K9MS24;B4DIF8	D6W5C0	2240	2259	SPTBN1	Spectrin beta chain, non-erythrocytic 1	1840700	38	0
147	DASVAEAWLLGQEPYLSSR	R	E	19	0	2091.03	D6W5C0;B2ZZ89;A0A087WUZ3;Q01082;Q01082-3;Q01082-2;K9MS24;B4DIF8	D6W5C0	1939	1957	SPTBN1	Spectrin beta chain, non-erythrocytic 1	922040	38	1
251	EQWANLEQLSAIR	R	K	13	0	1556.79	D6W5C0;B2ZZ89;A0A087WUZ3;Q01082;Q01082-3;Q01082-2;K9MS24	D6W5C0	638	650	SPTBN1	Spectrin beta chain, non-erythrocytic 1	1669200	38	1
279	FFWEMAEEEGWIR	K	E	13	0	1728.76	D6W5C0;B2ZZ89;A0A087WUZ3;Q01082;Q01082-3;Q01082-2;K9MS24;F8W6C1	D6W5C0	557	569	SPTBN1	Spectrin beta chain, non-erythrocytic 1	1140400	38	1
514	LAEISDVWEEMK	R	T	12	0	1448.69	D6W5C0;B2ZZ89;A0A087WUZ3;Q01082;Q01082-3;Q01082-2;K9MS24	D6W5C0	951	962	SPTBN1	Spectrin beta chain, non-erythrocytic 1	0	38	1
601	LVSQDNFGFDLPAVEAATK	R	K	19	0	2021.01	D6W5C0;B2ZZ89;A0A087WUZ3;Q01082;Q01082-3;Q01082-2;F8W6C1	D6W5C0	358	376	SPTBN1	Spectrin beta chain, non-erythrocytic 1	0	38	1
631	MHTTFEHDIQALGTQVR	R	Q	17	0	1982.96	D6W5C0;B2ZZ89;A0A087WUZ3;Q01082;Q01082-3;Q01082-2;K9MS24	D6W5C0	1759	1775	SPTBN1	Spectrin beta chain, non-erythrocytic 1	1547100	38	1
657	MWEVLESTTQTK	K	A	12	0	1451.7	D6W5C0;B2ZZ89;A0A087WUZ3;Q01082;Q01082-3;Q01082-2;K9MS24	D6W5C0	1275	1286	SPTBN1	Spectrin beta chain, non-erythrocytic 1	0	38	1
720	QALQDTLALYK	K	M	11	0	1262.69	D6W5C0;B2ZZ89;A0A087WUZ3;Q01082;Q01082-3;Q01082-2	D6W5C0	757	767	SPTBN1	Spectrin beta chain, non-erythrocytic 1	1369000	38	1
738	QLWGLLIEETEKR	K	H	13	1	1613.88	D6W5C0;B2ZZ89;A0A087WUZ3;Q01082;Q01082-3;Q01082-2;K9MS24	D6W5C0	1486	1498	SPTBN1	Spectrin beta chain, non-erythrocytic 1	1895500	38	1
742	QNLLSQSHAYQQFLR	R	D	15	0	1831.93	D6W5C0;B2ZZ89;A0A087WUZ3;Q01082;Q01082-3;Q01082-2;K9MS24	D6W5C0	1076	1090	SPTBN1	Spectrin beta chain, non-erythrocytic 1	2799700	38	1
859	SQNIVTDSSSLSAEAIR	R	Q	17	0	1776.89	D6W5C0;B2ZZ89;A0A087WUZ3;Q01082;Q01082-3;Q01082-2;K9MS24	D6W5C0	1462	1478	SPTBN1	Spectrin beta chain, non-erythrocytic 1	3877700	38	1
891	TAGYPNVNIHNFTTSWR	K	D	17	0	1976.95	D6W5C0;B2ZZ89;A0A087WUZ3;Q01082;Q01082-3;Q01082-2;K9MS24;F8W6C1	D6W5C0	101	117	SPTBN1	Spectrin beta chain, non-erythrocytic 1	1276400	38	0
941	TQTAIASEDMPNTLTEAEK	R	L	19	0	2048.96	D6W5C0;B2ZZ89;A0A087WUZ3;Q01082;Q01082-3;Q01082-2;K9MS24	D6W5C0	995	1013	SPTBN1	Spectrin beta chain, non-erythrocytic 1	2046800	38	0
1023	VQAVVAVAR	R	E	9	0	911.555	D6W5C0;B2ZZ89;A0A087WUZ3;Q01082;Q01082-3;Q01082-2;K9MS24;F8W6C1	D6W5C0	392	400	SPTBN1	Spectrin beta chain, non-erythrocytic 1	0	38	1
136	CVTDECFFFER	K	L	11	0	1508.61	D9ZGF5;A0A087WUF6;P09038-2;P09038-3;P09038-1;P09038	D9ZGF5	96	106	FGF2	Fibroblast growth factor;Fibroblast growth factor 2	4110100	37	1
582	LQLQAEER	K	G	8	0	985.519	D9ZGF5;A0A087WUF6;P09038-2;P09038-3;P09038-1;P09038	D9ZGF5	62	69	FGF2	Fibroblast growth factor;Fibroblast growth factor 2	5330100	37	1
96	ATENDIYNFFSPLNPVR	R	V	17	0	1995.97	E9PCY7;G8JLB6;P31943;H0YB39;H0YBG7;Q68DG4;H0YBD7;B4DP51;B4DKS8;A0A024R7T3;P52597	E9PCY7	300	316	HNRNPH1;DKFZp686A15170;HNRPF;HNRNPF	Heterogeneous nuclear ribonucleoprotein H;Heterogeneous nuclear ribonucleoprotein H, N-terminally processed;Heterogeneous nuclear ribonucleoprotein F;Heterogeneous nuclear ribonucleoprotein F, N-terminally processed	10915000	113	2
175	DLNYCFSGMSDHR	R	Y	13	0	1600.64	E9PCY7;G8JLB6;P31943;H0YB39;H0YBG7;Q68DG4;H0YBD7;P55795;B4DFK9;B4DP00	E9PCY7	263	275	HNRNPH1;DKFZp686A15170;HNRNPH2	Heterogeneous nuclear ribonucleoprotein H;Heterogeneous nuclear ribonucleoprotein H, N-terminally processed;Heterogeneous nuclear ribonucleoprotein H2;Heterogeneous nuclear ribonucleoprotein H2, N-terminally processed	18320000	113;152	2
227	EGRPSGEAFVELESEDEVK	R	L	19	1	2105.98	E9PCY7;G8JLB6;P31943;D6RIU0;D6RBM0;E7EQJ0;D6RAM1;D6R9T0;D6RFM3;D6RIT2;D6RDU3;D6RJ04;D6RIH9;E7EN40;D6RDL0	E9PCY7	50	68	HNRNPH1	Heterogeneous nuclear ribonucleoprotein H;Heterogeneous nuclear ribonucleoprotein H, N-terminally processed	6721800	113	2
392	HTGPNSPDTANDGFVR	K	L	16	0	1683.76	E9PCY7;G8JLB6;P31943;D6RIU0;D6RBM0;E7EQJ0;D6RAM1;E5RGV0;D6R9T0;D6RFM3;D6RIT2;D6RDU3;D6RJ04;D6RIH9;E5RGH4;H0YAQ2;P55795	E9PCY7	99	114	HNRNPH1;HNRNPH2	Heterogeneous nuclear ribonucleoprotein H;Heterogeneous nuclear ribonucleoprotein H, N-terminally processed;Heterogeneous nuclear ribonucleoprotein H2;Heterogeneous nuclear ribonucleoprotein H2, N-terminally processed	9302900	113;152	1
640	MMLGTEGGEGFVVK	-	V	14	0	1453.69	E9PCY7;G8JLB6;P31943;D6RIU0;D6RBM0;E7EQJ0;D6RAM1;E5RGV0;D6R9T0;D6RFM3;D6RIT2;D6RDU3;D6RJ04;D6RIH9;E7EN40;D6RDL0;E5RJ94;D6R9D3;D6RF17	E9PCY7	1	14	HNRNPH1	Heterogeneous nuclear ribonucleoprotein H;Heterogeneous nuclear ribonucleoprotein H, N-terminally processed	4364400	113	1
842	SNNVEMDWVLK	K	H	11	0	1333.63	E9PCY7;G8JLB6;P31943;D6RIU0;D6RBM0;E7EQJ0;D6RAM1;E5RGV0;D6R9T0;D6RFM3;D6RIT2;D6RDU3;D6RJ04;D6RIH9;E5RGH4;H0YAQ2	E9PCY7	88	98	HNRNPH1	Heterogeneous nuclear ribonucleoprotein H;Heterogeneous nuclear ribonucleoprotein H, N-terminally processed	9272000	113	1
871	STGEAFVQFASQEIAEK	R	A	17	0	1840.88	E9PCY7;G8JLB6;P31943;D6RIU0;D6RBM0;E5RGV0;H0YB39;E5RGH4;E7EN40;P55795;B4DFK9	E9PCY7	151	167	HNRNPH1;HNRNPH2	Heterogeneous nuclear ribonucleoprotein H;Heterogeneous nuclear ribonucleoprotein H, N-terminally processed;Heterogeneous nuclear ribonucleoprotein H2;Heterogeneous nuclear ribonucleoprotein H2, N-terminally processed	25379000	113;152	2
992	VHIEIGPDGR	R	V	10	0	1091.57	E9PCY7;G8JLB6;P31943;H0YB39;H0YBG7;Q68DG4;H0YBD7;B4DP51;B4DKS8;A0A024R7T3;P52597;P55795;B4DFK9;B4DP00	E9PCY7	317	326	HNRNPH1;DKFZp686A15170;HNRPF;HNRNPF;HNRNPH2	Heterogeneous nuclear ribonucleoprotein H;Heterogeneous nuclear ribonucleoprotein H, N-terminally processed;Heterogeneous nuclear ribonucleoprotein F;Heterogeneous nuclear ribonucleoprotein F, N-terminally processed;Heterogeneous nuclear ribonucleoprotein H2;Heterogeneous nuclear ribonucleoprotein H2, N-terminally processed	8916800	113;152	1
280	FIPLSEPAPVPPIPNEQQLAR	K	L	21	0	2312.25	E9PGT6;B2R8N1;A0A024R4D1;Q99627;Q99627-2;H7C3S9	E9PGT6	143	163	COPS8	COP9 signalosome complex subunit 8	32218000	14	2
334	GILEQGWQADSTTR	R	M	14	0	1560.75	E9PGT6;B2R8N1;A0A024R4D1;Q99627;Q99627-2;H7C3S9	E9PGT6	111	124	COPS8	COP9 signalosome complex subunit 8	14149000	14	1
497	KPVAGALDVSFNK	R	F	13	1	1344.74	E9PGT6;B2R8N1;A0A024R4D1;Q99627;Q99627-2;H7C3S9	E9PGT6	130	142	COPS8	COP9 signalosome complex subunit 8	28410000	14	1
715	PVAVMAESAFSFKK	M	L	14	1	1510.79	E9PGT6;B2R8N1;A0A024R4D1;Q99627;F8WEF2	E9PGT6	2	15	COPS8	COP9 signalosome complex subunit 8	2213500	14	1
789	SANSELGGIWSVGQR	K	I	15	0	1559.77	E9PGT6;B2R8N1;A0A024R4D1;Q99627;Q99627-2;B4DFF9	E9PGT6	66	80	COPS8	COP9 signalosome complex subunit 8	12428000	14	1
441	IPQSHIQQICETILTSGENLAR	K	K	22	0	2507.28	E9PHS0;Q6FHH6;Q53TN2;B2R602;A0A024R3Z5;O43813	E9PHS0	174	195	LANCL1	LanC-like protein 1	1259800	12	1
513	LAEIGAPIQGNREELVER	K	L	18	1	1993.06	E9PJT3;E9PJ04;H0YCG1;Q7Z3K9;A0A087WZZ5;E9PPJ0;Q13435	E9PJT3	36	53	SF3B2;DKFZp781L0540	Splicing factor 3B subunit 2	2333600	43	1
189	DRSDCLGEHLYVMVNAK	R	F	17	1	2005.93	E9PMI6;J3KN38;P54105;E9PJF4	E9PMI6	69	85	CLNS1A	Methylosome subunit pICln	183540000	117	7
203	DYEDGMEVDTTPTVAGQFEDADVDH	R	-	25	0	2755.11	E9PMI6;J3KN38;P54105;Q9P1H0	E9PMI6	143	167	CLNS1A	Methylosome subunit pICln	12586000	117	1
340	GLGTGTLYIAESR	K	L	13	0	1336.7	E9PMI6;J3KN38;P54105;E9PJF4	E9PMI6	31	43	CLNS1A	Methylosome subunit pICln	538700000	117	2
535	LEGMLSQSVSSQYNMAGVR	R	T	19	0	2055.97	E9PMI6;J3KN38;P54105;Q9P1H0	E9PMI6	118	136	CLNS1A	Methylosome subunit pICln	103810000	117	3
591	LSWLDGSGLGFSLEYPTISLHALSR	R	D	25	0	2718.4	E9PMI6;J3KN38;P54105;E9PJF4	E9PMI6	44	68	CLNS1A	Methylosome subunit pICln	4975400	117	1
743	QQPDTEAVLNGK	R	G	12	0	1298.65	E9PMI6;J3KN38;P54105;E9PJF4;E9PQ83	E9PMI6	19	30	CLNS1A	Methylosome subunit pICln	26367000	117	2
807	SFPPPGPAEGLLR	K	Q	13	0	1336.71	E9PMI6;J3KN38;P54105;E9PJF4;E9PQ83	E9PMI6	6	18	CLNS1A	Methylosome subunit pICln	63018000	117	8
898	TEDSIRDYEDGMEVDTTPTVAGQFEDADVDH	R	-	31	1	3456.44	E9PMI6;J3KN38;P54105;Q9P1H0	E9PMI6	137	167	CLNS1A	Methylosome subunit pICln	713800000	117	4
1029	VRSGPGLSDMHQYSQWLASR	K	H	20	1	2274.1	E9PQ37;E9PM28;E9PQ74;E9PRR5;O43903-2;O43903	E9PQ37	9	28	GAS2	Growth arrest-specific protein 2	256730000	116	1
157	DEILPTTPISEQK	K	G	13	0	1469.76	E9PSF4;Q9NQS8;E9PPU1;H0YEU2;E9PL09;Q53G83;P23396;P23396-2	E9PSF4	89	101	RPS3	40S ribosomal protein S3	4128000	114	1
0	AAAAEGVLATR	M	S	11	0	1028.56	F1T0F0;Q6QNY1	F1T0F0	2	12	BLOC1S2	Biogenesis of lysosome-related organelles complex 1 subunit 2	0	118	1
321	GFDQTINLILDESHER	K	V	16	0	1885.92	F2Z2Y6;C9JNV3;A4D0W0;O95777;C9JIZ0	F2Z2Y6	29	44	LSM8	U6 snRNA-associated Sm-like protein LSm8	4023300	55	1
944	TSALENYINR	M	T	10	0	1179.59	F2Z2Y6;C9JNV3;A4D0W0;O95777	F2Z2Y6	2	11	LSM8	U6 snRNA-associated Sm-like protein LSm8	1519600	55	1
431	ILYSQCGDVMR	K	A	11	0	1340.62	F8VPF3;F8W1R7;J3KND3;G8JLA2;G3V1V0;B7Z6Z4;P60660-2;P60660;F8W1I5;A0A024RB31;B4E368;P14649	F8VPF3	15	25	PDE6H;MYL6;MYL6B	Myosin light polypeptide 6;Myosin light chain 6B	0	93	1
671	NKDQGTYEDYVEGLR	K	V	15	1	1785.82	F8VPF3;F8W1R7;J3KND3;G8JLA2;G3V1V0;B7Z6Z4;P60660-2;P60660;F8VZU9;G3V1Y7;Q6IBG5;F8W180	F8VPF3	68	82	PDE6H;MYL6	Myosin light polypeptide 6	1985400	93	1
230	EIEIDIEPTDK	K	V	11	0	1300.64	F8VSA6;E9PS38;S4R3E9;E9PL57;Q15843	F8VSA6	12	22	NEDD8;NEDD8-MDP1	NEDD8	5276000	115	1
231	EIEIDIEPTDKVER	K	I	14	1	1684.85	F8VSA6;E9PS38;S4R3E9;E9PL57;Q15843	F8VSA6	12	25	NEDD8;NEDD8-MDP1	NEDD8	103630000	115	2
425	IKERVEEK	R	E	8	2	1029.58	F8VSA6;E9PS38;S4R3E9;E9PL57;Q15843	F8VSA6	26	33	NEDD8;NEDD8-MDP1	NEDD8	2652600	115	1
922	TLTGKEIEIDIEPTDKVER	K	I	19	2	2185.15	F8VSA6;E9PS38;S4R3E9;E9PL57;Q15843	F8VSA6	7	25	NEDD8;NEDD8-MDP1	NEDD8	79951000	115	4
1071	YIASVQGSTPSPR	R	Q	13	0	1361.69	F8WBP7;D3DX73;P49792	F8WBP7	11	23	RANBP2;hCG_1994636	E3 SUMO-protein ligase RanBP2	0	110	1
826	SIYGEKFEDENFILK	K	H	15	1	1830.9	F8WE65;C9J5S7;Q71V99;V9HWF5;B2RE56;A8K486;P62937-2;P62937	F8WE65	77	91	PPIA;HEL-S-69p	Peptidyl-prolyl cis-trans isomerase;Peptidyl-prolyl cis-trans isomerase A;Peptidyl-prolyl cis-trans isomerase A, N-terminally processed	5189400	59	1
712	PAVLGFEGSANK	M	I	12	0	1188.61	G3V445;Q9NPF4	G3V445	2	13	OSGEP	Probable tRNA N6-adenosine threonylcarbamoyltransferase	5148200	119	1
784	RTYVTPPGTGFLPGDTAR	R	H	18	1	1904.97	G3V445;Q9NPF4	G3V445	30	47	OSGEP	Probable tRNA N6-adenosine threonylcarbamoyltransferase	2122600	119	1
731	QKVDSLLENLEK	K	I	12	1	1414.77	G3V5V7;B4DQQ2;Q6PKD2;G3V2D6;G3V576;G3V4W0;B4DY08;B2R5W2;G3V4C1;P0DMR1;B7ZW38;A0A0G2JPF8;A0A0G2JNQ3;B2R603;G3V2Q1;A8K9A4;P07910-3;P07910-4;P07910-2;O60812;B2RXH8;P07910	G3V5V7	89	100	HNRNPC;HNRPCL1;LOC649330;HNRNPCL1;HNRNPCL2	Heterogeneous nuclear ribonucleoproteins C1/C2;Heterogeneous nuclear ribonucleoprotein C-like 1;Heterogeneous nuclear ribonucleoprotein C-like 2	1520700	52	1
786	RVQIEAAQCPDVVVAQIDPK	R	K	20	1	2235.17	G5EA29;H0YEL0;O14893-3;O14893-2;O14893	G5EA29	55	74	GEMIN2	Gem-associated protein 2	2287000	120	1
527	LDLSQPSPPSDSVPFLASLSEDCSLAVLDSSLSELFR	R	S	37	0	3977.95	H0Y711	H0Y711	205	241	WDR77		8802400	121	1
874	STSCVLSSAVHSQCVTGLVFSPHR	K	L	24	0	2615.26	H0Y711	H0Y711	181	204	WDR77		18509000	121	2
510	LADALQELR	R	A	9	0	1027.57	H0YAB0;Q8N519;Q5I6Y5;Q3BDU5;Q5TCI8;W8QEH3;P02545-5;P02545-2;P02545-4;P02545-6;P02545-3;P02545	H0YAB0	158	166	LMNA	Prelamin-A/C;Lamin-A/C	0	122	1
1011	VLLESEQFLTELTR	M	L	14	0	1676.9	H0YLA2;P37108	H0YLA2	2	15	SRP14	Signal recognition particle 14 kDa protein	2076400	124	1
78	APQTPSALLGQK	K	S	12	0	1209.67	H0YLX2;B7ZKX1;Q2KHR2-2;Q2KHR2	H0YLX2	464	475	RFX7	DNA-binding protein RFX7	116530000	94	3
897	TDLEKDIISDTSGDFRK	K	L	17	2	1938.95	H0YN52;H0YNA0;H0YN28;H0YL33;H0YNP5;H0YKS4;B3KRQ1;H0YMD0;H0YMU9;H0YM50;H0YN42;V9HW65;A0A024R5Z7;P07355;A6NMY6;P07355-2	H0YN52	36	52	ANXA2;HEL-S-270;ANXA2P2	Annexin;Annexin A2;Putative annexin A2-like protein	1867100	15	1
928	TNQELQEINR	R	V	10	0	1243.62	H0YN52;H0YNA0;H0YN28;H0YL33;H0YNP5;H0YKS4;B3KRQ1;H0YMD0;H0YMU9;H0YM50;H0YN42;V9HW65;A0A024R5Z7;P07355;A6NMY6;P07355-2;H0YLE2;H0YMM1;B4DNH8	H0YN52	19	28	ANXA2;HEL-S-270;ANXA2P2	Annexin;Annexin A2;Putative annexin A2-like protein	1358000	15	1
702	NTGIICTIGPASR	R	S	13	0	1358.7	H3BU13;H3BT25;H3BUW1;H3BTJ2;H3BQ34;A0A024R609;B4DNK4;H3BTN5;B4DRT3;V9HWB8;A0A024R5Z9;P14618-2;P14618	H3BU13	44	56	PKM;PKM2;HEL-S-30	Pyruvate kinase;Pyruvate kinase PKM	1352100	16	1
393	HVEDVPAFQALGSLNDLQFFR	K	Y	21	0	2402.2	H7BZJ8;A0JLQ0;C9JEV0;P25311	H7BZJ8	11	31	AZGP1	Zinc-alpha-2-glycoprotein	1148700	53	1
890	TAFQEALDAAGDK	K	L	13	0	1335.63	H9ZYJ2;P10599-2;P10599	H9ZYJ2	9	21	TXN	Thioredoxin	2888000	125	1
987	VGEFSGANK	K	E	9	0	907.44	H9ZYJ2;P10599-2;P10599	H9ZYJ2	86	94	TXN	Thioredoxin	6555700	125	1
158	DFQAISDVIGNK	R	S	12	0	1305.66	J3KN32;Q9UKL0	J3KN32	404	415	RCOR1	REST corepressor 1	0	127	1
1066	YFILPDSLPLDTLLVDVEPK	R	V	20	0	2286.24	J3QLI9;Q7Z5A3;P62314	J3QLI9	23	42	SNRPD1	Small nuclear ribonucleoprotein Sm D1	120610000	128	2
442	IQDKEGIPPDQQR	K	L	13	1	1522.77	J3QSA3;F5GZ39;M0R1V7;J3QS39;Q49A90;J3QTR3;F5H6Q2;Q3MIH3;F5GYU3;F5H2Z3;F5H265;Q5UGI3;B4DV12;F5H388;Q5RKT7;B2RDW1;F5H747;F5GXK7;J3QKN0;J3QLP7;Q5U5U6;Q5PY61;J3QRK5;Q9UFQ0;Q96C32;Q96MH4;L8B4I8;L8B196;Q96H31;L8B4R0;A8K674;L8B4Z6;L8B4M0;L8B4J3;Q66K58;Q59EM9;P62987;P62979;P0CG47;P0CG48;K7EMA8;M0R1M6;M0R2S1	J3QSA3	30	42	UBB;UBC;UBA52;RPS27A;HEL112;UBBP4;DKFZp434K0435;UbC	Ubiquitin-60S ribosomal protein L40;Ubiquitin;60S ribosomal protein L40;Ubiquitin-40S ribosomal protein S27a;Ubiquitin;40S ribosomal protein S27a;Polyubiquitin-B;Ubiquitin;Polyubiquitin-C;Ubiquitin	2915200	61	6
912	TITLEVEPSDTIENVK	K	A	16	0	1786.92	J3QSA3;F5GZ39;M0R1V7;J3QS39;Q49A90;J3QTR3;F5H6Q2;Q3MIH3;F5GYU3;F5H2Z3;F5H265;Q5UGI3;B4DV12;F5H388;Q5RKT7;B2RDW1;F5H747;F5GXK7;J3QKN0;J3QLP7;Q5U5U6;Q5PY61;J3QRK5;Q9UFQ0;Q96C32;Q96MH4;L8B4I8;L8B196;Q96H31;L8B4R0;A8K674;L8B4Z6;L8B4M0;L8B4J3;Q66K58;Q59EM9;P62987;P62979;P0CG47;P0CG48	J3QSA3	12	27	UBB;UBC;UBA52;RPS27A;HEL112;UBBP4;DKFZp434K0435;UbC	Ubiquitin-60S ribosomal protein L40;Ubiquitin;60S ribosomal protein L40;Ubiquitin-40S ribosomal protein S27a;Ubiquitin;40S ribosomal protein S27a;Polyubiquitin-B;Ubiquitin;Polyubiquitin-C;Ubiquitin	180000000	61	2
488	KKVEEVLEEEEEEYVVEK	K	V	18	2	2236.1	K7ELA4;B5MD17;J3KS05;Q6IBN6;P83916;C9JWS9	K7ELA4	8	25	CBX1	Chromobox protein homolog 1	2316200	90	1
1069	YGQISEVVVVK	K	D	11	0	1219.68	K7ENX8;K7ELV6;K7EJV5;Q6ZR81;K7ELT6;B4E2A3;K7EJV1;K7EMY9;K7EPM4;Q53XX5;K7ER40;K7EQR7;D6W5Y5;Q14011;Q14011-2	K7ENX8	29	39	CIRBP	Cold-inducible RNA-binding protein	4166600	87	1
621	MDEVLYSIAEK	K	V	11	0	1296.63	K7EPA6;K7EJU2;K7EMX5;O14835;K7ES07;P83876	K7EPA6	41	51	TXNL4A	Thioredoxin-like protein 4A	1428100	129	1
11	ACGLNFADLMAR	R	Q	12	0	1337.62	K7ERT7;A0A024R1Z6;Q99536	K7ERT7	85	96	VAT1	Synaptic vesicle membrane protein VAT-1 homolog	0	6	1
18	ADLINNLGTIAK	K	S	12	0	1241.7	K9JA46;P07900;P07900-2;Q8TBA7;Q2VPJ6;B4DTA5;Q86SX1;Q14568;Q58FF8;Q6PK50;B4DMA2;B4DGL0;A0A024RD80;P08238;O14942	K9JA46	101	112	EL52;HSP90AA1;HSP90AA2;HSP90AB2P;HSP90AB1	Heat shock protein HSP 90-alpha;Putative heat shock protein HSP 90-alpha A2;Putative heat shock protein HSP 90-beta 2;Heat shock protein HSP 90-beta	4885700	130;33	1
187	DQVANSAFVER	K	L	11	0	1234.59	K9JA46;P07900;P07900-2;Q8TBA7;Q2VPJ6;Q86U12;O75322;Q96HX7	K9JA46	500	510	EL52;HSP90AA1	Heat shock protein HSP 90-alpha	6543100	130	1
241	ELISNSSDALDK	R	I	12	0	1290.63	K9JA46;P07900;P07900-2;Q2VPJ6;G3V2J8;B4DTA5;Q86SX1;Q14568	K9JA46	47	58	EL52;HSP90AA1;HSP90AA2	Heat shock protein HSP 90-alpha;Putative heat shock protein HSP 90-alpha A2	1835800	130	1
309	FYEQFSK	K	N	7	0	947.439	K9JA46;P07900;P07900-2;Q8TBA7;Q2VPJ6;Q86U12;O75322;Q96HX7	K9JA46	437	443	EL52;HSP90AA1	Heat shock protein HSP 90-alpha	2725800	130	1
372	HGLEVIYMIEPIDEYCVQQLKEFEGK	K	T	26	1	3166.54	K9JA46;P07900;P07900-2;Q8TBA7;Q2VPJ6;Q86U12;O75322;Q96HX7	K9JA46	514	539	EL52;HSP90AA1	Heat shock protein HSP 90-alpha	3274700	130	1
377	HIYYITGETK	K	D	10	0	1223.62	K9JA46;P07900;P07900-2;Q8TBA7;Q2VPJ6;Q86U12;O75322;Q96HX7;Q58FG0	K9JA46	490	499	EL52;HSP90AA1;HSP90AA5P	Heat shock protein HSP 90-alpha;Putative heat shock protein HSP 90-alpha A5	5368600	130	1
380	HLEINPDHSIIETLR	K	Q	15	0	1785.94	K9JA46;P07900;P07900-2;Q8TBA7;O75322;Q96HX7	K9JA46	633	647	EL52;HSP90AA1	Heat shock protein HSP 90-alpha	10121000	130	1
389	HSQFIGYPITLFVEKER	K	D	17	1	2063.08	K9JA46;P07900;P07900-2;Q8TBA7;Q2VPJ6;Q86U12;G3V2J8	K9JA46	210	226	EL52;HSP90AA1	Heat shock protein HSP 90-alpha	1829100	130	0
602	LVTSPCCIVTSTYGWTANMER	R	I	21	0	2445.11	K9JA46;P07900;P07900-2;Q8TBA7;O75322;Q96HX7	K9JA46	592	612	EL52;HSP90AA1	Heat shock protein HSP 90-alpha	2744100	130	1
682	NPDDITNEEYGEFYK	R	S	15	0	1832.77	K9JA46;P07900;P07900-2;Q8TBA7;Q2VPJ6;Q86U12;O75322	K9JA46	300	314	EL52;HSP90AA1	Heat shock protein HSP 90-alpha	9005100	130	1
1000	VILHLKEDQTEYLEER	K	R	16	1	2014.04	K9JA46;P07900;P07900-2;Q8TBA7;Q2VPJ6;Q86U12;G3V2J8;Q58FF6;Q58FF7;Q6PK50;B4DMA2;B4DGL0;A0A024RD80;P08238	K9JA46	186	201	EL52;HSP90AA1;HSP90AB4P;HSP90AB3P;HSP90AB1	Heat shock protein HSP 90-alpha;Putative heat shock protein HSP 90-beta 4;Putative heat shock protein HSP 90-beta-3;Heat shock protein HSP 90-beta	6426100	130;33	2
1103	YYTSASGDEMVSLKDYCTR	R	M	19	1	2244.97	K9JA46;P07900;P07900-2;Q8TBA7;Q2VPJ6;Q86U12;O75322;Q96HX7	K9JA46	465	483	EL52;HSP90AA1	Heat shock protein HSP 90-alpha	3767600	130	1
90	ASLYSFPEPEAAQPMTK	R	K	17	0	1865.89	K9MRS9;A0A024R1E6;P78395;B7ZAT0;K9MSY5;B7Z7K8;B7Z986;E7EW99;H7C2P3;A0A0G2JRX7	K9MRS9	141	157	PRAME	Melanoma antigen preferentially expressed in tumors	988480000	4	3
91	ASLYSFPEPEAAQPMTKK	R	R	18	1	1993.98	K9MRS9;A0A024R1E6;P78395;B7ZAT0;K9MSY5;B7Z7K8;B7Z986;E7EW99;H7C2P3;A0A0G2JRX7	K9MRS9	141	158	PRAME	Melanoma antigen preferentially expressed in tumors	67335000	4	1
109	AVLDGLDVLLAQEVRPR	K	R	17	1	1863.06	K9MRS9;A0A024R1E6;P78395;B7ZAT0;K9MSY5;B7Z986;E7EW99;H7C2P3;A0A0G2JRX7;E7EMH2;B5MCY4	K9MRS9	99	115	PRAME	Melanoma antigen preferentially expressed in tumors	131820000	4	3
156	DEALAIAALELLPR	K	E	14	0	1493.85	K9MRS9;A0A024R1E6;P78395;B7ZAT0;B7Z7K8;E7EW99;H7C2P3;A0A0G2JRX7;E7EMH2;B5MCY4;A0A0G2JRX8;B5MD04	K9MRS9	37	50	PRAME	Melanoma antigen preferentially expressed in tumors	24074000	4	2
223	EGACDELFSYLIEK	K	V	14	0	1672.77	K9MRS9;A0A024R1E6;P78395;B7ZAT0;K9MSY5;B7Z7K8;B7Z986;E7EW99	K9MRS9	185	198	PRAME	Melanoma antigen preferentially expressed in tumors	164350000	4	1
239	ELFPPLFMAAFDGR	R	H	14	0	1609.8	K9MRS9;A0A024R1E6;P78395;B7ZAT0;K9MSY5;B7Z7K8;E7EW99;H7C2P3;A0A0G2JRX7;E7EMH2;B5MCY4;A0A0G2JRX8;B5MD04	K9MRS9	51	64	PRAME	Melanoma antigen preferentially expressed in tumors	404270000	4	2
242	ELLCELGRPSMVWLSANPCPHCGDR	R	T	25	1	2953.35	K9MRS9;A0A024R1E6;P78395;B7ZAT0;K9MSY5;B7Z7K8;B7Z986	K9MRS9	469	493	PRAME	Melanoma antigen preferentially expressed in tumors	9223000	4	1
300	FSPYLGQMINLR	K	R	12	0	1437.74	K9MRS9;A0A024R1E6;P78395;B7ZAT0;K9MSY5;B7Z7K8;B7Z986	K9MRS9	252	263	PRAME	Melanoma antigen preferentially expressed in tumors	37305000	4	1
301	FSPYLGQMINLRR	K	L	13	1	1593.85	K9MRS9;A0A024R1E6;P78395;B7ZAT0;K9MSY5;B7Z7K8;B7Z986	K9MRS9	252	264	PRAME	Melanoma antigen preferentially expressed in tumors	3232200	4	1
353	GQHLHLETFK	K	A	10	0	1208.63	K9MRS9;A0A024R1E6;P78395;B7ZAT0;K9MSY5;B7Z7K8;B7Z986;E7EW99;H7C2P3;A0A0G2JRX7;E7EMH2;B5MCY4;A0A0G2JRX8	K9MRS9	89	98	PRAME	Melanoma antigen preferentially expressed in tumors	5039700	4	2
395	HVMNPLETLSITNCR	R	L	15	0	1783.87	K9MRS9;A0A024R1E6;P78395;B7ZAT0;K9MSY5;B7Z7K8;B7Z986	K9MRS9	319	333	PRAME	Melanoma antigen preferentially expressed in tumors	47583000	4	1
407	IFAMPMQDIK	K	M	10	0	1192.6	K9MRS9;A0A024R1E6;P78395;B7ZAT0;K9MSY5;B7Z7K8;B7Z986	K9MRS9	215	224	PRAME	Melanoma antigen preferentially expressed in tumors	117730000	4	1
496	KNSHQDFWTVWSGNR	R	A	15	1	1860.87	K9MRS9;A0A024R1E6;P78395;B7ZAT0;K9MSY5;B7Z7K8;B7Z986;E7EW99;H7C2P3;A0A0G2JRX7;E7EMH2	K9MRS9	126	140	PRAME	Melanoma antigen preferentially expressed in tumors	33821000	4	1
502	KVDGLSTEAEQPFIPVEVLVDLFLK	R	E	25	1	2785.52	K9MRS9;A0A024R1E6;P78395;B7ZAT0;K9MSY5;B7Z7K8;B7Z986;E7EW99	K9MRS9	160	184	PRAME	Melanoma antigen preferentially expressed in tumors	197940000	4	2
597	LVELAGQSLLK	R	D	11	0	1169.7	K9MRS9;A0A024R1E6;P78395;B7ZAT0;K9MSY5;B7Z7K8;E7EW99;H7C2P3;A0A0G2JRX7;E7EMH2;B5MCY4;A0A0G2JRX8;B5MD04	K9MRS9	26	36	PRAME	Melanoma antigen preferentially expressed in tumors	6816100	4	1
656	MVQLDSIEDLEVTCTWK	K	L	17	0	2065.97	K9MRS9;A0A024R1E6;P78395;B7ZAT0;K9MSY5;B7Z7K8;B7Z986	K9MRS9	229	245	PRAME	Melanoma antigen preferentially expressed in tumors	17384000	4	2
697	NSHQDFWTVWSGNR	K	A	14	0	1732.77	K9MRS9;A0A024R1E6;P78395;B7ZAT0;K9MSY5;B7Z7K8;B7Z986;E7EW99;H7C2P3;A0A0G2JRX7;E7EMH2	K9MRS9	127	140	PRAME	Melanoma antigen preferentially expressed in tumors	401860000	4	3
714	PSMVWLSANPCPHCGDR	R	T	17	0	1982.86	K9MRS9;A0A024R1E6;P78395;B7ZAT0;K9MSY5;B7Z7K8;B7Z986	K9MRS9	477	493	PRAME	Melanoma antigen preferentially expressed in tumors	1988200	4	1
771	RKVDGLSTEAEQPFIPVEVLVDLFLK	K	E	26	2	2941.62	K9MRS9;A0A024R1E6;P78395;B7ZAT0;K9MSY5;B7Z7K8;B7Z986;E7EW99	K9MRS9	159	184	PRAME	Melanoma antigen preferentially expressed in tumors	36196000	4	2
974	VDGLSTEAEQPFIPVEVLVDLFLKEGACDELFSYLIEK	K	V	38	1	4312.18	K9MRS9;A0A024R1E6;P78395;B7ZAT0;K9MSY5;B7Z7K8;B7Z986;E7EW99	K9MRS9	161	198	PRAME	Melanoma antigen preferentially expressed in tumors	15415000	4	2
1076	YISMSVWTSPR	R	R	11	0	1325.64	K9MRS9;A0A024R1E6;P78395;K9MSY5;E7EW99;H7C2P3;E7EMH2;B5MCY4;A0A0G2JRX8;B5MD04	K9MRS9	14	24	PRAME	Melanoma antigen preferentially expressed in tumors	16350000	4	1
642	MNQMSSGGAQLMLLK	R	F	15	0	1607.78	L0R599	L0R599	30	44	CIRH1A		4343100	131	1
6	AAILPTSIFLTNK	K	K	13	0	1387.81	O14744;B2RDD7;O14744-2;O14744-5;O14744-3;B4DV00;H0YJX6	O14744	228	240	PRMT5	Protein arginine N-methyltransferase 5;Protein arginine N-methyltransferase 5, N-terminally processed;Protein arginine N-methyltransferase 5	162720000	132	2
7	AAILPTSIFLTNKK	K	G	14	1	1515.9	O14744;B2RDD7;O14744-2;O14744-5;O14744-3;B4DV00;H0YJX6	O14744	228	241	PRMT5	Protein arginine N-methyltransferase 5;Protein arginine N-methyltransferase 5, N-terminally processed;Protein arginine N-methyltransferase 5	110330000	132	2
9	AAMAVGGAGGSR	M	V	12	0	1003.49	O14744;B2RDD7;O14744-5;G3V580;G3V2X6;G3V2L6;C9JSX3;G3V507;G3V2F5	O14744	2	13	PRMT5	Protein arginine N-methyltransferase 5;Protein arginine N-methyltransferase 5, N-terminally processed;Protein arginine N-methyltransferase 5	2958300000	132	8
15	ADIIVSELLGSFADNELSPECLDGAQHFLK	K	D	30	0	3287.6	O14744;B2RDD7;O14744-2;O14744-5;O14744-3;B4DV00;O14744-4;H0YJD3	O14744	429	458	PRMT5	Protein arginine N-methyltransferase 5;Protein arginine N-methyltransferase 5, N-terminally processed;Protein arginine N-methyltransferase 5	1572200000	132	2
125	CLLDRVPEEEKDTNVQVLMVLGAGR	K	G	25	2	2840.45	O14744;B2RDD7;O14744-2;O14744-5;O14744-3;B4DV00;O14744-4;H0YJX6;H0YJ77	O14744	344	368	PRMT5	Protein arginine N-methyltransferase 5;Protein arginine N-methyltransferase 5, N-terminally processed;Protein arginine N-methyltransferase 5	2081600000	132	29
151	DDGVSIPGEYTSFLAPISSSK	K	L	21	0	2169.05	O14744;B2RDD7;O14744-2;O14744-5;O14744-3;B4DV00;O14744-4;H0YJD3	O14744	459	479	PRMT5	Protein arginine N-methyltransferase 5;Protein arginine N-methyltransferase 5, N-terminally processed;Protein arginine N-methyltransferase 5	341180000	132	4
152	DDIIENAPTTHTEEYSGEEK	R	T	20	0	2276.99	O14744;B2RDD7;O14744-2;O14744-5;O14744-3;B4DV00;G3V580;H0YJX6;G3V5L5;G3V2X6	O14744	165	184	PRMT5	Protein arginine N-methyltransferase 5;Protein arginine N-methyltransferase 5, N-terminally processed;Protein arginine N-methyltransferase 5	639710000	132	3
153	DDIIENAPTTHTEEYSGEEKTWMWWHNFR	R	T	29	1	3621.59	O14744;B2RDD7;O14744-2;O14744-5;O14744-3;B4DV00;G3V580;H0YJX6;G3V5L5;G3V2X6	O14744	165	193	PRMT5	Protein arginine N-methyltransferase 5;Protein arginine N-methyltransferase 5, N-terminally processed;Protein arginine N-methyltransferase 5	11214000	132	1
174	DLNCVPEIADTLGAVAK	R	Q	17	0	1784.9	O14744;B2RDD7;O14744-5;G3V580;G3V2X6;G3V2L6;C9JSX3;G3V507;G3V2F5	O14744	19	35	PRMT5	Protein arginine N-methyltransferase 5;Protein arginine N-methyltransferase 5, N-terminally processed;Protein arginine N-methyltransferase 5	4298100000	132	13
185	DPEAQFEMPYVVR	R	L	13	0	1579.73	O14744;B2RDD7;O14744-2;O14744-5;O14744-3;B4DV00;O14744-4;H0YJD3;H7BZ44	O14744	493	505	PRMT5	Protein arginine N-methyltransferase 5;Protein arginine N-methyltransferase 5, N-terminally processed;Protein arginine N-methyltransferase 5	49624000	132	3
186	DPIKYSQYQQAIYK	K	C	14	1	1743.88	O14744;B2RDD7;O14744-2;O14744-5;O14744-3;B4DV00;O14744-4;H0YJX6;H0YJ77;G3V5T6	O14744	330	343	PRMT5	Protein arginine N-methyltransferase 5;Protein arginine N-methyltransferase 5, N-terminally processed;Protein arginine N-methyltransferase 5	24280000	132	2
188	DRDPEAQFEMPYVVR	K	L	15	1	1850.86	O14744;B2RDD7;O14744-2;O14744-5;O14744-3;B4DV00;O14744-4;H0YJD3;H7BZ44	O14744	491	505	PRMT5	Protein arginine N-methyltransferase 5;Protein arginine N-methyltransferase 5, N-terminally processed;Protein arginine N-methyltransferase 5	1139800000	132	6
201	DWNTLIVGK	R	L	9	0	1044.56	O14744;B2RDD7;O14744-2;O14744-4;G3V580;G3V5L5;G3V2L6	O14744	77	85	PRMT5	Protein arginine N-methyltransferase 5;Protein arginine N-methyltransferase 5, N-terminally processed;Protein arginine N-methyltransferase 5	2240700000	132	6
221	EFIQEPAK	R	N	8	0	960.492	O14744;B2RDD7;O14744-2;O14744-5;O14744-3;O14744-4;G3V580;G3V5L5;G3V2L6;C9JSX3	O14744	53	60	PRMT5	Protein arginine N-methyltransferase 5;Protein arginine N-methyltransferase 5, N-terminally processed;Protein arginine N-methyltransferase 5	1978100000	132	4
222	EFIQEPAKNRPGPQTR	R	S	16	2	1866.97	O14744;B2RDD7;O14744-2;O14744-5;O14744-3;O14744-4;G3V580;G3V5L5;G3V2L6;C9JSX3	O14744	53	68	PRMT5	Protein arginine N-methyltransferase 5;Protein arginine N-methyltransferase 5, N-terminally processed;Protein arginine N-methyltransferase 5	4693600	132	1
235	EKDRDPEAQFEMPYVVR	R	L	17	2	2108	O14744;B2RDD7;O14744-2;O14744-5;O14744-3;B4DV00;O14744-4;H0YJD3;H7BZ44	O14744	489	505	PRMT5	Protein arginine N-methyltransferase 5;Protein arginine N-methyltransferase 5, N-terminally processed;Protein arginine N-methyltransferase 5	3691000000	132	10
270	EWVAPEKADIIVSELLGSFADNELSPECLDGAQHFLK	R	D	37	1	4127.02	O14744;B2RDD7;O14744-2;O14744-5;O14744-3;B4DV00;O14744-4;H0YJD3	O14744	422	458	PRMT5	Protein arginine N-methyltransferase 5;Protein arginine N-methyltransferase 5, N-terminally processed;Protein arginine N-methyltransferase 5	336070000	132	3
323	GFPVLSK	K	M	7	0	746.433	O14744;B2RDD7;O14744-2;O14744-5;O14744-3;B4DV00;H0YJX6	O14744	242	248	PRMT5	Protein arginine N-methyltransferase 5;Protein arginine N-methyltransferase 5, N-terminally processed;Protein arginine N-methyltransferase 5	17319000	132	0
351	GPLVNASLR	R	A	9	0	925.535	O14744;B2RDD7;O14744-2;O14744-5;O14744-3;B4DV00;O14744-4;H0YJX6;H0YJ77	O14744	369	377	PRMT5	Protein arginine N-methyltransferase 5;Protein arginine N-methyltransferase 5, N-terminally processed;Protein arginine N-methyltransferase 5	1064200000	132	2
363	GYEDYLQSPLQPLMDNLESQTYEVFEK	K	D	27	0	3235.49	O14744;B2RDD7;O14744-2;O14744-5;O14744-3;B4DV00;O14744-4;H0YJX6;G3V2L6;H0YJ77;G3V5T6	O14744	303	329	PRMT5	Protein arginine N-methyltransferase 5;Protein arginine N-methyltransferase 5, N-terminally processed;Protein arginine N-methyltransferase 5	41965000	132	1
364	GYEDYLQSPLQPLMDNLESQTYEVFEKDPIK	K	Y	31	1	3688.75	O14744;B2RDD7;O14744-2;O14744-5;O14744-3;B4DV00;O14744-4;H0YJX6;G3V2L6;H0YJ77;G3V5T6	O14744	303	333	PRMT5	Protein arginine N-methyltransferase 5;Protein arginine N-methyltransferase 5, N-terminally processed;Protein arginine N-methyltransferase 5	2802900000	132	1
399	IAVALEIGADLPSNHVIDR	R	W	19	0	2002.08	O14744;B2RDD7;O14744-2;O14744-5;O14744-3;B4DV00;G3V580;G3V2X6	O14744	202	220	PRMT5	Protein arginine N-methyltransferase 5;Protein arginine N-methyltransferase 5, N-terminally processed;Protein arginine N-methyltransferase 5	108340000	132	6
427	IKLYAVEKNPNAVVTLENWQFEEWGSQVTVVSSDMR	R	E	36	2	4166.08	O14744;B2RDD7;O14744-2;O14744-5;O14744-3;B4DV00;O14744-4	O14744	386	421	PRMT5	Protein arginine N-methyltransferase 5;Protein arginine N-methyltransferase 5, N-terminally processed;Protein arginine N-methyltransferase 5	37380000	132	3
482	KGFPVLSK	K	M	8	1	874.528	O14744;B2RDD7;O14744-2;O14744-5;O14744-3;B4DV00;H0YJX6	O14744	241	248	PRMT5	Protein arginine N-methyltransferase 5;Protein arginine N-methyltransferase 5, N-terminally processed;Protein arginine N-methyltransferase 5	38754000	132	1
505	KVWYEWAVTAPVCSAIHNPTGR	K	S	22	1	2541.26	O14744;B2RDD7;O14744-2;O14744-5;O14744-3;B4DV00;O14744-4;H7BZ44	O14744	610	631	PRMT5	Protein arginine N-methyltransferase 5;Protein arginine N-methyltransferase 5, N-terminally processed;Protein arginine N-methyltransferase 5	192360000	132	3
549	LHNFHQLSAPQPCFTFSHPNR	R	D	21	0	2534.2	O14744;B2RDD7;O14744-2;O14744-5;O14744-3;B4DV00;O14744-4;H0YJD3;H7BZ44	O14744	506	526	PRMT5	Protein arginine N-methyltransferase 5;Protein arginine N-methyltransferase 5, N-terminally processed;Protein arginine N-methyltransferase 5	68326000	132	3
550	LHNFHQLSAPQPCFTFSHPNRDPMIDNNR	R	Y	29	1	3489.62	O14744;B2RDD7;O14744-2;O14744-5;O14744-3;B4DV00;O14744-4;H0YJD3;H7BZ44	O14744	506	534	PRMT5	Protein arginine N-methyltransferase 5;Protein arginine N-methyltransferase 5, N-terminally processed;Protein arginine N-methyltransferase 5	147630000	132	22
586	LSPWIRPDSK	K	V	10	1	1197.65	O14744;O14744-2;O14744-4;G3V580;G3V5L5;G3V2X6;G3V2L6;C9JSX3	O14744	86	95	PRMT5	Protein arginine N-methyltransferase 5;Protein arginine N-methyltransferase 5, N-terminally processed	2977200000	132	9
587	LSPWIRPDSKVEK	K	I	13	2	1553.86	O14744;O14744-2;O14744-4;G3V580;G3V5L5;G3V2X6;G3V2L6;C9JSX3	O14744	86	98	PRMT5	Protein arginine N-methyltransferase 5;Protein arginine N-methyltransferase 5, N-terminally processed	37392000	132	3
605	LYAVEKNPNAVVTLENWQFEEWGSQVTVVSSDMR	K	E	34	1	3924.9	O14744;B2RDD7;O14744-2;O14744-5;O14744-3;B4DV00;O14744-4	O14744	388	421	PRMT5	Protein arginine N-methyltransferase 5;Protein arginine N-methyltransferase 5, N-terminally processed;Protein arginine N-methyltransferase 5	249270000	132	15
686	NPNAVVTLENWQFEEWGSQVTVVSSDMR	K	E	28	0	3221.51	O14744;B2RDD7;O14744-2;O14744-5;O14744-3;B4DV00;O14744-4	O14744	394	421	PRMT5	Protein arginine N-methyltransferase 5;Protein arginine N-methyltransferase 5, N-terminally processed;Protein arginine N-methyltransferase 5	56386000	132	4
687	NPNAVVTLENWQFEEWGSQVTVVSSDMREWVAPEK	K	A	35	1	4060.93	O14744;B2RDD7;O14744-2;O14744-5;O14744-3;B4DV00;O14744-4	O14744	394	428	PRMT5	Protein arginine N-methyltransferase 5;Protein arginine N-methyltransferase 5, N-terminally processed;Protein arginine N-methyltransferase 5	37798000	132	2
696	NSEAAMLQELNFGAYLGLPAFLLPLNQEDNTNLAR	R	V	35	0	3846.93	O14744;B2RDD7;O14744-2;H0YJX6;G3V5L5;G3V2X6;C9JSX3	O14744	102	136	PRMT5	Protein arginine N-methyltransferase 5;Protein arginine N-methyltransferase 5, N-terminally processed;Protein arginine N-methyltransferase 5	298960000	132	2
724	QGFDFLCMPVFHPR	K	F	14	0	1749.81	O14744;B2RDD7;O14744-2;O14744-5;O14744-3;O14744-4;G3V580;G3V2L6;C9JSX3	O14744	36	49	PRMT5	Protein arginine N-methyltransferase 5;Protein arginine N-methyltransferase 5, N-terminally processed;Protein arginine N-methyltransferase 5	4120000000	132	8
762	REFIQEPAK	K	N	9	1	1116.59	O14744;B2RDD7;O14744-2;O14744-5;O14744-3;O14744-4;G3V580;G3V5L5;G3V2L6;C9JSX3	O14744	52	60	PRMT5	Protein arginine N-methyltransferase 5;Protein arginine N-methyltransferase 5, N-terminally processed;Protein arginine N-methyltransferase 5	45718000	132	1
769	RIAVALEIGADLPSNHVIDR	K	W	20	1	2158.19	O14744;B2RDD7;O14744-2;O14744-5;O14744-3;B4DV00;G3V580;G3V2X6	O14744	201	220	PRMT5	Protein arginine N-methyltransferase 5;Protein arginine N-methyltransferase 5, N-terminally processed;Protein arginine N-methyltransferase 5	4377100	132	1
777	RNSEAAMLQELNFGAYLGLPAFLLPLNQEDNTNLAR	R	V	36	1	4003.03	O14744;B2RDD7;O14744-2;H0YJX6;G3V5L5;G3V2X6;C9JSX3	O14744	101	136	PRMT5	Protein arginine N-methyltransferase 5;Protein arginine N-methyltransferase 5, N-terminally processed;Protein arginine N-methyltransferase 5	37409000	132	3
795	SDLLLSGR	R	D	8	0	859.476	O14744;B2RDD7;O14744-2;O14744-5;O14744-3;O14744-4;G3V580;G3V5L5;G3V2L6;C9JSX3	O14744	69	76	PRMT5	Protein arginine N-methyltransferase 5;Protein arginine N-methyltransferase 5, N-terminally processed;Protein arginine N-methyltransferase 5	1090200000	132	2
796	SDLLLSGRDWNTLIVGK	R	L	17	1	1886.03	O14744;B2RDD7;O14744-2;O14744-4;G3V580;G3V5L5;G3V2L6	O14744	69	85	PRMT5	Protein arginine N-methyltransferase 5;Protein arginine N-methyltransferase 5, N-terminally processed;Protein arginine N-methyltransferase 5	965960000	132	5
960	TWMWWHNFR	K	T	9	0	1362.61	O14744;B2RDD7;O14744-2;O14744-5;O14744-3;B4DV00;G3V580;H0YJX6;G3V5L5;G3V2X6	O14744	185	193	PRMT5	Protein arginine N-methyltransferase 5;Protein arginine N-methyltransferase 5, N-terminally processed;Protein arginine N-methyltransferase 5	98927000	132	3
1013	VLTNHIHTGHHSSMFWMR	R	V	18	0	2190.04	O14744;B2RDD7;O14744-2;O14744-5;O14744-3;B4DV00;H0YJX6;G3V5L5;G3V2X6;C9JSX3	O14744	137	154	PRMT5	Protein arginine N-methyltransferase 5;Protein arginine N-methyltransferase 5, N-terminally processed;Protein arginine N-methyltransferase 5	80917000	132	22
1020	VPEEEKDTNVQVLMVLGAGR	R	G	20	1	2183.13	O14744;B2RDD7;O14744-2;O14744-5;O14744-3;B4DV00;O14744-4;H0YJX6;H0YJ77	O14744	349	368	PRMT5	Protein arginine N-methyltransferase 5;Protein arginine N-methyltransferase 5, N-terminally processed;Protein arginine N-methyltransferase 5	342430000	132	7
1021	VPLVAPEDLR	R	D	10	0	1107.63	O14744;B2RDD7;O14744-2;O14744-5;O14744-3;B4DV00;G3V580;H0YJX6;G3V5L5;G3V2X6;C9JSX3	O14744	155	164	PRMT5	Protein arginine N-methyltransferase 5;Protein arginine N-methyltransferase 5, N-terminally processed;Protein arginine N-methyltransferase 5	808460000	132	5
1022	VPLVAPEDLRDDIIENAPTTHTEEYSGEEK	R	T	30	1	3366.61	O14744;B2RDD7;O14744-2;O14744-5;O14744-3;B4DV00;G3V580;H0YJX6;G3V5L5;G3V2X6	O14744	155	184	PRMT5	Protein arginine N-methyltransferase 5;Protein arginine N-methyltransferase 5, N-terminally processed;Protein arginine N-methyltransferase 5	1450900000	132	6
1035	VSSGRDLNCVPEIADTLGAVAK	R	Q	22	1	2271.15	O14744;B2RDD7;O14744-5;G3V580;G3V2X6;G3V2L6;C9JSX3;G3V507;G3V2F5	O14744	14	35	PRMT5	Protein arginine N-methyltransferase 5;Protein arginine N-methyltransferase 5, N-terminally processed;Protein arginine N-methyltransferase 5	93197000	132	4
1093	YSQYQQAIYK	K	C	10	0	1290.62	O14744;B2RDD7;O14744-2;O14744-5;O14744-3;B4DV00;O14744-4;H0YJX6;H0YJ77;G3V5T6	O14744	334	343	PRMT5	Protein arginine N-methyltransferase 5;Protein arginine N-methyltransferase 5, N-terminally processed;Protein arginine N-methyltransferase 5	1038800000	132	2
37	AGTQIENIDEDFRDGLK	K	L	17	1	1919.92	O43707;F5GXS2;O43707-3;B4DSX0;B4E337;K7EP19;B3W6H4	O43707	67	83	ACTN4;MLL-ACTN4	Alpha-actinin-4	995930	134	1
261	ETTDTDTADQVIASFK	R	V	16	0	1740.81	O43707;F5GXS2;O43707-3;Q96BG6;O43707-2;H7C144	O43707	838	853	ACTN4	Alpha-actinin-4	2038100	134	1
400	ICDQWDALGSLTHSR	K	R	15	0	1757.82	O43707;F5GXS2;O43707-3;Q96BG6;O43707-2	O43707	498	512	ACTN4	Alpha-actinin-4	6984400	134	1
469	KDDPVTNLNNAFEVAEK	R	Y	17	1	1902.93	O43707;B4DSX0;B4E337;K7EJH8	O43707	217	233	ACTN4	Alpha-actinin-4	1147500	134	1
637	MLDAEDIVNTARPDEK	K	A	16	1	1815.87	O43707;B4DSX0;B4E337	O43707	240	255	ACTN4	Alpha-actinin-4	2394500	134	1
733	QLEAIDQLHLEYAK	K	R	14	0	1669.87	O43707;F5GXS2;O43707-3;Q96BG6;O43707-2	O43707	522	535	ACTN4	Alpha-actinin-4	2558700	134	1
911	TINEVENQILTR	R	D	12	0	1428.76	Q5ZEZ4;H0YJ11;H0YJW3;H7C5W8;A1L0V1;B3KUX9;B4DFY0;B7Z2W3;H9KV75;B7Z565;A0A024R694;P12814-2;P12814;P12814-3;P12814-4;O43707;F5GXS2;O43707-3;Q96BG6;O43707-2;H7C144	O43707	746	757	ACTN1;ACTN4	Alpha-actinin-1;Alpha-actinin-4	5346800	134;17	1
991	VGWEQLLTTIAR	R	T	12	0	1385.77	Q5ZEZ4;H0YJ11;H0YJW3;H7C5W8;A1L0V1;B3KUX9;B4DFY0;B7Z2W3;H9KV75;B7Z565;A0A024R694;P12814-2;P12814;P12814-3;P12814-4;O43707;F5GXS2;O43707-3;Q96BG6;O43707-2;H7C144	O43707	734	745	ACTN1;ACTN4	Alpha-actinin-1;Alpha-actinin-4	5430800	134;17	1
36	AGSNMLLIGVHGPTTPCEEVSMK	K	H	23	0	2427.16	O75369-6;O75369-3;O75369-2;O75369-9;O75369;O75369-8;Q68CT4;E7EN95;O75369-7;A0A0A0MT44	O75369-6	2475	2497	FLNB;DKFZp686A1668	Filamin-B	3821900	135	1
42	AHGPGLEGGLVGKPAEFTIDTK	K	G	22	1	2193.14	O75369-6;O75369-3;O75369-2;O75369-9;O75369;O75369-8;A0A024R321;O75369-5;O75369-4;Q68CT4;E7EN95;O75369-7	O75369-6	1045	1066	FLNB;DKFZp686A1668	Filamin-B	4726500	135	2
144	DAGEGLLAVQITDQEGKPK	R	R	19	1	1968.02	O75369-6;O75369-3;O75369-2;O75369-9;O75369;O75369-8;A0A024R321;O75369-5;O75369-4;Q68CT4;E7EN95;O75369-7	O75369-6	1546	1564	FLNB;DKFZp686A1668	Filamin-B	1674400	135	1
314	GAGIGGLGITVEGPSESK	R	I	18	0	1627.84	O75369-6;O75369-3;O75369-2;O75369-9;O75369;O75369-8;A0A024R321;O75369-5;O75369-4;Q68CT4;E7EN95;O75369-7	O75369-6	1355	1372	FLNB;DKFZp686A1668	Filamin-B	1369400	135	1
600	LVSPGSANETSSILVESVTR	R	S	20	0	2045.06	O75369-6;O75369-3;O75369-2;O75369-9;O75369;O75369-8;A0A024R321;Q68CT4;E7EN95;O75369-7;A0A0A0MT44	O75369-6	2411	2430	FLNB;DKFZp686A1668	Filamin-B	1339000	135	1
848	SPFVVQVGEACNPNACR	K	A	17	0	1903.87	O75369-6;O75369-3;O75369-2;O75369-9;O75369;O75369-8;A0A024R321;O75369-5;O75369-4;Q68CT4;E7EN95;O75369-7	O75369-6	440	456	FLNB;DKFZp686A1668	Filamin-B	1685200	135	1
1008	VLFASQEIPASPFR	K	V	14	0	1560.83	O75369-6;O75369-3;O75369-2;O75369-9;O75369;O75369-8;A0A024R321;O75369-5;O75369-4;Q68CT4;E7EN95;O75369-7	O75369-6	823	836	FLNB;DKFZp686A1668	Filamin-B	2361200	135	1
329	GHYTEGAELVDAVLDVVR	K	K	18	0	1941.98	Q9BUF5;K7ESM5;B3KS31;K7EL29;K7ES63;P04350;B4DJ43;B4DE77;M0R278;M0R1I1	P04350	104	121	TUBB6;TUBB4A	Tubulin beta-6 chain;Tubulin beta-4A chain	10516000	137;191	1
330	GHYTEGAELVDAVLDVVRK	K	E	19	1	2070.07	Q9BUF5;K7ESM5;B3KS31;K7EL29;K7ES63;P04350;B4DJ43;B4DE77;M0R278;M0R1I1	P04350	104	122	TUBB6;TUBB4A	Tubulin beta-6 chain;Tubulin beta-4A chain	3506400	137;191	1
436	INVYYNEATGGNYVPR	R	A	16	0	1828.87	P04350;B4DJ43;B4DE77;M0R278;M0QY85;M0R0X0;M0QY37;M0QX14;M0QZL7	P04350	47	62	TUBB4A	Tubulin beta-4A chain	6328900	137	1
564	LLETECPQYIR	K	K	11	0	1420.7	P05109	P05109	37	47	S100A8	Protein S100-A8;Protein S100-A8, N-terminally processed	0	139	1
12	ACGLVASNLNLKPGECLR	M	V	18	1	1971	P09382;F8WEI7	P09382	2	19	LGALS1	Galectin-1	76270000	142	2
161	DGGAWGTEQR	K	E	10	0	1075.47	P09382	P09382	65	74	LGALS1	Galectin-1	4464300	142	1
191	DSNNLCLHFNPR	K	F	12	0	1485.68	P09382	P09382	38	49	LGALS1	Galectin-1	13345000	142	1
290	FNAHGDANTIVCNSK	R	D	15	0	1646.75	P09382	P09382	50	64	LGALS1	Galectin-1	37303000	142	2
573	LNLEAINYMAADGDFK	R	I	16	0	1783.85	P09382	P09382	113	128	LGALS1	Galectin-1	12220000	142	1
574	LPDGYEFKFPNR	K	L	12	1	1481.73	P09382	P09382	101	112	LGALS1	Galectin-1	6433300	142	1
4	AAEEAFVNDIDESSPGTEWER	R	V	21	0	2351.02	P09496-5;P09496-2	P09496-5	111	131			2867300	143	1
732	QLANMVNNLK	R	E	10	0	1143.61	P19474-2;P19474	P19474-2	68	77	TRIM21	E3 ubiquitin-protein ligase TRIM21	0	146	1
804	SESWNLKDLDITSPELR	R	S	17	1	2002	P19474-2;P19474	P19474-2	177	193	TRIM21	E3 ubiquitin-protein ligase TRIM21	3762400	146	1
894	TCAVHITLDPDTANPWLILSEDRR	R	Q	24	1	2792.39	P19474-2;P19474;H0YDP8	P19474-2	207	230	TRIM21	E3 ubiquitin-protein ligase TRIM21	6588100	146	1
13	ACIDSNEDGDLSK	R	S	13	0	1422.59	P29144;Q5VZU9;B7Z920	P29144	208	220	TPP2	Tripeptidyl-peptidase 2	16380000	149	1
24	ADVIPVHYYLIPPPTK	K	T	16	0	1822	P29144;B7Z920	P29144	984	999	TPP2	Tripeptidyl-peptidase 2	10443000	149	1
72	AMIEVINHK	R	C	9	0	1053.56	P29144;Q5VZU9;B7Z920	P29144	313	321	TPP2	Tripeptidyl-peptidase 2	9432300	149	1
76	ANNIDYTVHSVR	K	R	12	0	1387.68	P29144;Q5VZU9;B7Z920	P29144	468	479	TPP2	Tripeptidyl-peptidase 2	14216000	149	2
93	ATAATEEPFPFHGLLPK	M	K	17	0	1824.94	P29144;Q5VZU9;B7Z920	P29144	2	18	TPP2	Tripeptidyl-peptidase 2	23210000	149	1
114	AYDYLVQNTSFANK	K	L	14	0	1632.78	P29144;Q5VZU9;B7Z920	P29144	507	520	TPP2	Tripeptidyl-peptidase 2	5591800	149	1
119	CDLVNYSYGEATHWPNSGR	K	I	19	0	2224.96	P29144;Q5VZU9;B7Z920	P29144	322	340	TPP2	Tripeptidyl-peptidase 2	16481000	149	1
160	DGEIVGLSGR	K	V	10	0	1001.51	P29144;Q5VZU9;B7Z920	P29144	86	95	TPP2	Tripeptidyl-peptidase 2	30058000	149	1
219	EELQSQVELLNSFEK	K	K	15	0	1791.89	P29144;Q5VZU9;B7Z920	P29144	172	186	TPP2	Tripeptidyl-peptidase 2	5952900	149	1
220	EELQSQVELLNSFEKK	K	Y	16	1	1919.98	P29144;Q5VZU9;B7Z920	P29144	172	187	TPP2	Tripeptidyl-peptidase 2	1913200	149	1
224	EGLHYTEVCGYDIASPNAGPLFR	R	V	23	0	2565.2	P29144;Q5VZU9;B7Z920	P29144	606	628	TPP2	Tripeptidyl-peptidase 2	42577000	149	2
237	EKLPANQYTWSSR	R	G	13	1	1578.78	P29144;Q5VZU9;B7Z920	P29144	400	412	TPP2	Tripeptidyl-peptidase 2	7796000	149	1
273	FCSLPEK	K	G	7	0	879.416	P29144;Q5VZU9;B7Z920	P29144	709	715	TPP2	Tripeptidyl-peptidase 2	5154900	149	1
304	FVLHAVQLVK	K	Q	10	0	1152.7	P29144;Q5VZU9;B7Z920	P29144	688	697	TPP2	Tripeptidyl-peptidase 2	8222200	149	1
315	GAGPGCYLAGSLTLSK	K	T	16	0	1550.78	P29144;Q5VZU9;B7Z920	P29144	962	977	TPP2	Tripeptidyl-peptidase 2	25457000	149	1
319	GCALADHLLHTQAQDGAISTDAEGK	K	E	25	0	2578.21	P29144;Q5VZU9	P29144	1128	1152	TPP2	Tripeptidyl-peptidase 2	3099100	149	1
336	GIYLRDPVQVAAPSDHGVGIEPVFPENTENSEK	R	I	33	1	3563.75	P29144;Q5VZU9;B7Z920	P29144	532	564	TPP2	Tripeptidyl-peptidase 2	15734000	149	1
342	GLREGLHYTEVCGYDIASPNAGPLFR	R	V	26	1	2891.4	P29144;Q5VZU9;B7Z920	P29144	603	628	TPP2	Tripeptidyl-peptidase 2	1879600	149	1
362	GVLIAVLDTGVDPGAPGMQVTTDGKPK	R	I	27	1	2635.39	P29144;Q5VZU9;B7Z920	P29144	37	63	TPP2	Tripeptidyl-peptidase 2	83683000	149	2
368	HFIEVPEGATWAEVTVCSCSSEVSAK	R	F	26	0	2879.31	P29144;Q5VZU9;B7Z920	P29144	662	687	TPP2	Tripeptidyl-peptidase 2	3251100	149	1
401	ICEVINEAVWK	R	H	11	0	1359.69	P29144;Q5VZU9;B7Z920	P29144	341	351	TPP2	Tripeptidyl-peptidase 2	20885000	149	1
438	IPASWTNPSGK	K	Y	11	0	1156.59	P29144;Q5VZU9;B7Z920	P29144	99	109	TPP2	Tripeptidyl-peptidase 2	17313000	149	1
457	IVDIIDTTGSGDVNTATEVEPK	K	D	22	0	2273.13	P29144;Q5VZU9;B7Z920	P29144	64	85	TPP2	Tripeptidyl-peptidase 2	54871000	149	2
465	KADVIPVHYYLIPPPTK	K	T	17	1	1950.1	P29144;B7Z920	P29144	983	999	TPP2	Tripeptidyl-peptidase 2	18797000	149	3
476	KETGAASFLCR	K	Y	11	1	1238.61	P29144;Q5VZU9;B7Z920	P29144	19	29	TPP2	Tripeptidyl-peptidase 2	31001000	149	2
508	KYSDPGPVYDCLVWHDGEVWR	K	A	21	1	2577.17	P29144;Q5VZU9;B7Z920	P29144	187	207	TPP2	Tripeptidyl-peptidase 2	18420000	149	1
532	LDSSDIYNELK	K	E	11	0	1295.62	P29144;Q5VZU9;B7Z920	P29144	1036	1046	TPP2	Tripeptidyl-peptidase 2	6145400	149	1
533	LDSSDIYNELKETYPNYLPLYVAR	K	L	24	1	2875.43	P29144;Q5VZU9;B7Z920	P29144	1036	1059	TPP2	Tripeptidyl-peptidase 2	14336000	149	1
551	LHQLDAEKER	R	M	10	1	1237.64	P29144;Q5VZU9	P29144	1060	1069	TPP2	Tripeptidyl-peptidase 2	3266900	149	1
555	LIKEELQSQVELLNSFEK	K	K	18	1	2146.15	P29144;Q5VZU9;B7Z920	P29144	169	186	TPP2	Tripeptidyl-peptidase 2	24871000	149	1
556	LIKEELQSQVELLNSFEKK	K	Y	19	2	2274.25	P29144;Q5VZU9;B7Z920	P29144	169	187	TPP2	Tripeptidyl-peptidase 2	6832800	149	1
589	LSTMETGTGLIR	R	A	12	0	1277.66	P29144;Q5VZU9;B7Z920	P29144	301	312	TPP2	Tripeptidyl-peptidase 2	19094000	149	1
708	NWVQTLRPVSAK	K	T	12	1	1397.78	P29144;Q5VZU9;B7Z920	P29144	792	803	TPP2	Tripeptidyl-peptidase 2	11117000	149	1
739	QLYEMVLTYNFHQPK	R	S	15	0	1909.94	P29144;Q5VZU9;B7Z920	P29144	818	832	TPP2	Tripeptidyl-peptidase 2	11545000	149	2
873	STLVDALCR	K	K	9	0	1033.52	P29144;Q5VZU9	P29144	1118	1126	TPP2	Tripeptidyl-peptidase 2	37675000	149	1
1010	VLKIPASWTNPSGK	R	Y	14	1	1496.84	P29144;Q5VZU9;B7Z920	P29144	96	109	TPP2	Tripeptidyl-peptidase 2	5568200	149	1
1018	VNESSHYDLAFTDVHFKPGQIR	K	R	22	1	2559.25	P29144;Q5VZU9;B7Z920	P29144	639	660	TPP2	Tripeptidyl-peptidase 2	39699000	149	2
1090	YNQPFFVTSLPDDK	K	I	14	0	1669.8	P29144;Q5VZU9;B7Z920	P29144	945	958	TPP2	Tripeptidyl-peptidase 2	4568800	149	1
341	GLPWSCSADEVMR	R	F	13	0	1506.66	P55795;B4DFK9;B4DP00	P55795	17	29	HNRNPH2	Heterogeneous nuclear ribonucleoprotein H2;Heterogeneous nuclear ribonucleoprotein H2, N-terminally processed	3109300	152	1
843	SNSVEMDWVLK	K	H	11	0	1306.62	P55795	P55795	88	98	HNRNPH2	Heterogeneous nuclear ribonucleoprotein H2;Heterogeneous nuclear ribonucleoprotein H2, N-terminally processed	1993900	152	1
44	AHTDFFEAFK	K	N	10	0	1211.56	P61201;Q59EL2;P61201-2;B4DIH5;Q53HJ0;H0YKU5	P61201	254	263	COPS2	COP9 signalosome complex subunit 2	33829000	154	2
45	AHTDFFEAFKNYDESGSPR	K	R	19	1	2216.98	P61201;Q59EL2;P61201-2;B4DIH5;Q53HJ0	P61201	254	272	COPS2	COP9 signalosome complex subunit 2	18846000	154	1
59	ALKEDDPKAALSSFQK	K	V	16	2	1746.92	P61201;Q59EL2;P61201-2;B2R6N0;Q53HJ0;H0YKU5	P61201	41	56	COPS2	COP9 signalosome complex subunit 2	13082000	154	1
69	ALYEQSLHIK	K	S	10	0	1200.65	P61201;Q59EL2;P61201-2;B4DIH5;B2R6N0;Q53HJ0;H0YKU5;H0YM03	P61201	216	225	COPS2	COP9 signalosome complex subunit 2	41951000	154	2
403	IDQVNQLLELDHQKR	R	G	15	1	1847.99	P61201;Q59EL2;P61201-2;B4DIH5;B2R6N0;Q53HJ0	P61201	402	416	COPS2	COP9 signalosome complex subunit 2	23072000	154	2
415	IHIPFISK	R	E	8	0	953.57	P61201;Q59EL2;P61201-2;B4DIH5;B2R6N0;Q53HJ0;H0YMC2	P61201	369	376	COPS2	COP9 signalosome complex subunit 2	0	154	1
611	LYLEREEYGK	K	L	10	1	1298.65	P61201;Q59EL2;P61201-2;B4DIH5;B2R6N0;Q53HJ0;H0YKU5;H0YM03	P61201	158	167	COPS2	COP9 signalosome complex subunit 2	0	154	1
667	NDPEILAMTNLVSAYQNNDITEFEK	K	I	25	0	2868.35	P61201;Q59EL2;P61201-2;B4DIH5;B2R6N0	P61201	304	328	COPS2	COP9 signalosome complex subunit 2	6862100	154	1
735	QLHQSCQTDDGEDDLKKGTQLLEIYALEIQMYTAQK	R	N	36	2	4210.02	P61201;Q59EL2;P61201-2;B4DIH5;B2R6N0;Q53HJ0;H0YKU5;H0YM03	P61201	174	209	COPS2	COP9 signalosome complex subunit 2	23389000	154	1
740	QMDLLQEFYETTLEALKDAK	K	N	20	1	2385.18	P61201;B4DIH5;B2R6N0;Q53HJ0;H0YKU5;H0YM03	P61201	124	143	COPS2	COP9 signalosome complex subunit 2	24697000	154	1
788	SAIPHPLIMGVIR	K	E	13	0	1402.81	P61201;Q59EL2;P61201-2;B4DIH5;B2R6N0;Q53HJ0;H0YKU5;H0YM03	P61201	226	238	COPS2	COP9 signalosome complex subunit 2	10877000	154	1
812	SGINPFDSQEAKPYK	K	N	15	1	1679.82	P61201;Q59EL2;P61201-2;B4DIH5;B2R6N0;Q53HJ0	P61201	289	303	COPS2	COP9 signalosome complex subunit 2	4640900	154	1
813	SGINPFDSQEAKPYKNDPEILAMTNLVSAYQNNDITEFEK	K	I	40	2	4530.15	P61201;Q59EL2;P61201-2;B4DIH5;B2R6N0	P61201	289	328	COPS2	COP9 signalosome complex subunit 2	118310000	154	1
822	SINSILDYISTSK	K	Q	13	0	1439.75	P61201;Q59EL2;P61201-2;B4DIH5;B2R6N0;Q53HJ0;H0YKU5;H0YM03	P61201	111	123	COPS2	COP9 signalosome complex subunit 2	14749000	154	2
1005	VLELEGEKGEWGFK	K	A	14	1	1619.82	P61201;Q59EL2;P61201-2;B2R6N0;Q53HJ0;H0YKU5	P61201	57	70	COPS2	COP9 signalosome complex subunit 2	3816000	154	1
1055	WTNQLNSLNQAVVSK	K	L	15	0	1700.88	P61201;Q59EL2;P61201-2;B4DIH5;B2R6N0;Q53HJ0	P61201	427	441	COPS2	COP9 signalosome complex subunit 2	16033000	154	2
1094	YTALDKWTNQLNSLNQAVVSK	R	L	21	1	2392.24	P61201;Q59EL2;P61201-2;B4DIH5;B2R6N0;Q53HJ0	P61201	421	441	COPS2	COP9 signalosome complex subunit 2	52900000	154	1
918	TLIDDDNPPVSFVK	K	F	14	0	1558.79	P61964	P61964	208	221	WDR5	WD repeat-containing protein 5	972140	155	0
1074	YILAATLDNTLK	K	L	12	0	1334.74	P61964	P61964	228	239	WDR5	WD repeat-containing protein 5	762040	155	1
366	HCNMVLENVK	R	E	10	0	1242.58	P62316;P62316-2	P62316	62	71	SNRPD2	Small nuclear ribonucleoprotein Sm D2	18200000	157	1
630	MFLRGDSVIVVLR	K	N	13	1	1503.86	P62316;P62316-2;K7EJB5	P62316	99	111	SNRPD2	Small nuclear ribonucleoprotein Sm D2	7553900	157	1
681	NNTQVLINCR	K	N	10	0	1230.61	P62316;K7ERG4;P62316-2	P62316	38	47	SNRPD2	Small nuclear ribonucleoprotein Sm D2	41726000	157	1
761	REEEEFNTGPLSVLTQSVK	K	N	19	1	2162.09	P62316;K7ERG4;P62316-2	P62316	19	37	SNRPD2	Small nuclear ribonucleoprotein Sm D2	16353000	157	2
802	SEMTPEELQK	K	R	10	0	1190.55	P62316;K7ERG4	P62316	9	18	SNRPD2	Small nuclear ribonucleoprotein Sm D2	16912000	157	1
803	SEMTPEELQKREEEEFNTGPLSVLTQSVK	K	N	29	2	3334.62	P62316;K7ERG4	P62316	9	37	SNRPD2	Small nuclear ribonucleoprotein Sm D2	32454000	157	1
966	VAQLEQVYIR	R	G	10	0	1217.68	P62318-2;P62318	P62318-2	55	64	SNRPD3	Small nuclear ribonucleoprotein Sm D3	4201800	158	1
1	AAAMDVDTPSGTNSGAGK	M	K	18	0	1648.74	P62877	P62877	2	19	RBX1	E3 ubiquitin-protein ligase RBX1;E3 ubiquitin-protein ligase RBX1, N-terminally processed	191040000	159	1
2	AAAMDVDTPSGTNSGAGKK	M	R	19	1	1776.83	P62877	P62877	2	20	RBX1	E3 ubiquitin-protein ligase RBX1;E3 ubiquitin-protein ligase RBX1, N-terminally processed	204810000	159	1
755	QVCPLDNREWEFQK	R	Y	14	1	1847.86	P62877	P62877	92	105	RBX1	E3 ubiquitin-protein ligase RBX1;E3 ubiquitin-protein ligase RBX1, N-terminally processed	976620000	159	4
756	QVCPLDNREWEFQKYGH	R	-	17	2	2205.01	P62877	P62877	92	108	RBX1	E3 ubiquitin-protein ligase RBX1;E3 ubiquitin-protein ligase RBX1, N-terminally processed	37125000	159	1
943	TRQVCPLDNREWEFQK	K	Y	16	2	2105.01	P62877	P62877	90	105	RBX1	E3 ubiquitin-protein ligase RBX1;E3 ubiquitin-protein ligase RBX1, N-terminally processed	29953000	159	2
1053	WNAVALWAWDIVVDNCAICR	K	N	20	0	2431.16	P62877	P62877	27	46	RBX1	E3 ubiquitin-protein ligase RBX1;E3 ubiquitin-protein ligase RBX1, N-terminally processed	3458000	159	1
776	RNDFQLIGIQDGYLSLLQDSGEVR	K	E	24	1	2735.39	P63241;P63241-2;I3L397;I3L504	P63241	86	109	EIF5A	Eukaryotic translation initiation factor 5A-1	1336900	161	1
1059	YDCGEEILITVLSAMTEEAAVAIK	K	A	24	0	2625.29	P63241;P63241-2;Q6IS14	P63241	127	150	EIF5A;EIF5AL1	Eukaryotic translation initiation factor 5A-1;Eukaryotic translation initiation factor 5A-1-like	3881700	161	1
168	DHPFGFVAVPTK	K	N	12	0	1313.68	P63279;H3BPC4;H3BQQ9;A8K503;Q7KZS0;B0QYN7	P63279	19	30	UBE2I	SUMO-conjugating enzyme UBC9	1938700	162	1
639	MLFKDDYPSSPPK	R	C	13	1	1523.73	P63279;H3BPC4;H3BQQ9;A8K503;Q7KZS0;B0QYN7	P63279	62	74	UBE2I	SUMO-conjugating enzyme UBC9	7668300	162	2
684	NPDGTMNLMNWECAIPGKK	K	G	19	1	2174.99	P63279;H3BPC4;H3BQQ9;A8K503;Q7KZS0;B0QYN7	P63279	31	49	UBE2I	SUMO-conjugating enzyme UBC9	0	162	1
728	QILLGIQELLNEPNIQDPAQAEAYTIYCQNR	K	V	31	0	3614.8	P63279	P63279	111	141	UBE2I	SUMO-conjugating enzyme UBC9	7123800	162	2
105	AVFVDLEPTVIDEIR	R	N	15	0	1714.91	P68366-2;P68366;C9JEV8;C9JQ00;C9JJQ8;C9JDL2	P68366-2	50	64	TUBA4A	Tubulin alpha-4A chain	3151400	164	1
910	TIGGGDDSFTTFFCETGAGK	K	H	20	0	2066.89	P68366-2;P68366;C9JEV8;C9JQ00;C9JJQ8;C9JDL2	P68366-2	26	45	TUBA4A	Tubulin alpha-4A chain	2208700	164	1
149	DAVEDLESVGK	K	G	11	0	1160.56	P81605;P81605-2	P81605	86	96	DCD	Dermcidin;Survival-promoting peptide;DCD-1	6232100	166	1
100	AVAEQVLHSQSR	R	H	12	0	1323.69	Q01804	Q01804	49	60	OTUD4	OTU domain-containing protein 4	1733100	168	1
254	ESNYFGLSPEER	R	R	12	0	1426.64	Q01804;Q01804-5;Q01804-3	Q01804	436	447	OTUD4	OTU domain-containing protein 4	3571400	168	1
286	FLNADVQGIHSENGPVLVEELGK	K	K	23	0	2464.26	Q01804;Q01804-5;Q01804-3;D6RI06	Q01804	300	322	OTUD4	OTU domain-containing protein 4	1245200	168	1
287	FLNADVQGIHSENGPVLVEELGKK	K	H	24	1	2592.35	Q01804;Q01804-5;Q01804-3;D6RI06	Q01804	300	323	OTUD4	OTU domain-containing protein 4	2181900	168	1
569	LLYEIQNRDEQAFPALSSSSVNQSASQSSNPCVQR	R	K	35	1	3909.86	Q01804;Q01804-5;Q01804-3	Q01804	458	492	OTUD4	OTU domain-containing protein 4	3487800	168	1
741	QNIVLPSDEKGELDLSLENLDLSK	R	D	24	1	2668.38	Q01804;Q01804-5;Q01804-3;A0PJA7	Q01804	878	901	OTUD4	OTU domain-containing protein 4	4060900	168	1
303	FTTDDSICVLGISK	K	R	14	0	1554.76	Q01813-2;Q01813;Q8WTZ9;O14943;H0Y757;Q49A78;B1APP8	Q01813-2	703	716	PFKP;PFK-P	ATP-dependent 6-phosphofructokinase, platelet type	2827700	169	1
417	IIEVVDAIMTTAQSHQR	R	T	17	0	1910.99	Q01813-2;Q01813;Q5VSR5	Q01813-2	186	202	PFKP	ATP-dependent 6-phosphofructokinase, platelet type	1249600	169	1
478	KEWSGLLEELAR	R	N	12	1	1429.76	Q01813-2;Q01813;Q5VSR5;V9GYV7	Q01813-2	131	142	PFKP	ATP-dependent 6-phosphofructokinase, platelet type	1387400	169	1
517	LAIKLPDDQIPK	R	T	12	1	1349.79	Q01813-2;Q01813;Q8WTZ9;O14943;B1APP6	Q01813-2	389	400	PFKP;PFK-P	ATP-dependent 6-phosphofructokinase, platelet type	4017500	169	1
705	NVIFQPVAELKK	R	Q	12	1	1384.81	Q01813-2;Q01813;Q8WTZ9;O14943;H0Y757;Q49A78;B1APP8	Q01813-2	718	729	PFKP;PFK-P	ATP-dependent 6-phosphofructokinase, platelet type	6202000	169	1
805	SFAGNLNTYKR	R	L	11	1	1269.65	Q01813-2;Q01813;Q8WTZ9;O14943;B1APP6	Q01813-2	378	388	PFKP;PFK-P	ATP-dependent 6-phosphofructokinase, platelet type	4190000	169	1
926	TNCNVAVINVGAPAAGMNAAVR	K	S	22	0	2169.08	Q01813-2;Q01813;Q8WTZ9;B1APP6	Q01813-2	401	422	PFKP	ATP-dependent 6-phosphofructokinase, platelet type	4772200	169	2
16	ADKEAAFDDAVEER	M	V	14	1	1564.7	Q09028-3;Q09028;E9PNS2;E9PIC4;E9PNS6	Q09028-3	2	15	RBBP4	Histone-binding protein RBBP4	52191000	170	1
205	EAAFDDAVEER	K	V	11	0	1250.54	Q09028-3;Q09028;E9PNS2;E9PIC4;E9PNS6	Q09028-3	5	15	RBBP4	Histone-binding protein RBBP4	1263300	170	1
386	HPSKPDPSGECNPDLR	K	L	16	1	1804.82	Q09028-3;Q09028;Q09028-2;Q09028-4	Q09028-3	157	172	RBBP4	Histone-binding protein RBBP4	1788000	170	1
411	IGEEQSPEDAEDGPPELLFIHGGHTAK	K	I	27	0	2872.35	Q09028-3;Q09028;Q09028-2;Q09028-4;H0YF10;B4DRT0;H0YCT5;H0YDK2;H0YEU5	Q09028-3	350	376	RBBP4	Histone-binding protein RBBP4	94151000	170	1
433	INHEGEVNR	K	A	9	0	1066.52	Q6FHQ0;Q16576;E9PC52;Q16576-2;A8K6A2;Q5JP01;Q09028-3;Q09028;Q09028-2;Q09028-4	Q09028-3	121	129	RBBP7;RBBP4	Histone-binding protein RBBP7;Histone-binding protein RBBP4	13189000	170;176	1
841	SNNTSKPSHSVDAHTAEVNCLSFNPYSEFILATGSADK	R	T	38	1	4094.89	Q09028-3;Q09028;Q09028-2;Q09028-4;H0YF10;B4DRT0;H0YCT5;H0YDK2	Q09028-3	259	296	RBBP4	Histone-binding protein RBBP4	27179000	170	1
934	TPSSDVLVFDYTK	K	H	13	0	1470.72	Q6FHQ0;Q16576;E9PC52;Q16576-2;Q5JP01;Q09028-3;Q09028;Q09028-2;Q09028-4;H0YF10	Q09028-3	144	156	RBBP7;RBBP4	Histone-binding protein RBBP7;Histone-binding protein RBBP4	37663000	170;176	1
936	TPSSDVLVFDYTKHPSKPDPSGECNPDLR	K	L	29	2	3257.53	Q09028-3;Q09028;Q09028-2;Q09028-4	Q09028-3	144	172	RBBP4	Histone-binding protein RBBP4	49758000	170	1
1001	VINEEYKIWK	R	K	10	1	1320.71	Q6FHQ0;Q16576;E9PC52;Q16576-2;A8K6A2;C9JAJ9;Q09028-3;Q09028;Q09028-2;E9PNS2;E9PIC4;E9PNS6	Q09028-3	16	25	RBBP7;RBBP4	Histone-binding protein RBBP7;Histone-binding protein RBBP4	11611000	170;176	2
1085	YMPQNPCIIATK	R	T	12	0	1434.7	Q09028-3;Q09028;Q09028-2;Q09028-4	Q09028-3	132	143	RBBP4	Histone-binding protein RBBP4	40130000	170	1
763	REFYRDK	K	K	7	2	1012.51	Q0GM92;H0YII8;B4DEG2;K7EQ78;Q93086-2;Q93086-5;Q93086-1;Q93086;Q93086-4	Q0GM92	86	92	P2RX5	P2X purinoceptor;P2X purinoceptor 5	1790300	83	0
27	AESTPEIAEQR	K	G	11	0	1229.59	Q13098-7;C9JFE4;Q13098-5;Q13098;B4DND6;Q13098-6	Q13098-7	261	271	GPS1	COP9 signalosome complex subunit 1	6268700	171	1
58	ALIQYFSPYVSADMHR	R	M	16	0	1896.92	Q13098-7;C9JFE4;A8K070;Q13098-5;Q13098;B4DND6;A0A096LP07;A0A096LPJ3;Q13098-6;J3QQX0	Q13098-7	409	424	GPS1	COP9 signalosome complex subunit 1	21194000	171	1
192	DSSAPSSASSSVTDLYCTPHSSR	R	S	23	0	2398.03	Q13098-7;A8K070;J3KRJ4;Q13098-6;J3QLE8;J3QL53;J3KRE8;J3KSY1	Q13098-7	3	25	GPS1	COP9 signalosome complex subunit 1	2519700	171	1
245	ELQNAPDAIPESGVEPPALDTAWVEATR	R	K	28	0	2975.45	Q13098-7;C9JFE4;A8K070;Q13098-5;Q13098;B4DND6;A0A096LP07;A0A096LPJ3;J3KSA5;J3KRJ4;J3QLT0;J3QS88;J3KTB0;Q59F65	Q13098-7	144	171	GPS1	COP9 signalosome complex subunit 1	84102000	171	1
246	ELQNAPDAIPESGVEPPALDTAWVEATRK	R	K	29	1	3103.55	Q13098-7;C9JFE4;A8K070;Q13098-5;Q13098;B4DND6;A0A096LP07;A0A096LPJ3;J3KSA5;J3KRJ4;J3QLT0;J3QS88;J3KTB0;Q59F65	Q13098-7	144	172	GPS1	COP9 signalosome complex subunit 1	2894300	171	1
327	GHDDLGDHYLDCGDLSNALK	R	C	20	0	2213.96	Q13098-7;C9JFE4;A8K070;Q13098-5;Q13098;B4DND6;A0A096LP07;A0A096LPJ3;J3KSA5;J3KRJ4;Q13098-6;J3QLT0;Q59F65	Q13098-7	200	219	GPS1	COP9 signalosome complex subunit 1	96513000	171	3
394	HVINMCLNVIK	K	V	11	0	1339.71	Q13098-7;C9JFE4;A8K070;Q13098-5;Q13098;B4DND6;A0A096LP07;A0A096LPJ3;J3KSA5;Q13098-6;Q59F65	Q13098-7	233	243	GPS1	COP9 signalosome complex subunit 1	3978700	171	1
540	LFLELEPQVR	K	D	10	0	1242.7	Q13098-7;C9JFE4;A8K070;Q13098-5;Q13098;B4DND6;A0A096LP07;A0A096LPJ3;Q13098-6	Q13098-7	354	363	GPS1	COP9 signalosome complex subunit 1	12206000	171	1
579	LQFIADHCPTLR	R	V	12	0	1469.74	Q13098-7;C9JFE4;A8K070;Q13098-5;Q13098;B4DND6;A0A096LP07;A0A096LPJ3;J3KSA5;J3KRJ4;J3QLT0;J3QS88;J3KTB0;J3QLE8;J3QL53;J3KRE8;J3QS84	Q13098-7	100	111	GPS1	COP9 signalosome complex subunit 1	85464000	171	2
580	LQFIADHCPTLRVEALK	R	M	17	1	2010.07	Q13098-7;C9JFE4;A8K070;Q13098-5;Q13098;B4DND6;A0A096LP07;A0A096LPJ3;J3KSA5;J3KRJ4;J3QLT0;J3QS88;J3KTB0;J3QLE8;J3QL53;J3KRE8;J3QS84	Q13098-7	100	116	GPS1	COP9 signalosome complex subunit 1	12561000	171	1
638	MLDEMKDNLLLDMYLAPHVR	K	T	20	1	2416.2	Q13098-7;C9JFE4;A8K070;Q13098-5;Q13098;B4DND6;A0A096LP07;A0A096LPJ3;Q13098-6	Q13098-7	380	399	GPS1	COP9 signalosome complex subunit 1	8198400	171	1
706	NVISSSSFK	R	L	9	0	967.497	Q13098-7;C9JFE4;A8K070;Q13098-5;Q13098;B4DND6;A0A096LP07;A0A096LPJ3;Q13098-6	Q13098-7	345	353	GPS1	COP9 signalosome complex subunit 1	4132000	171	1
766	RGHDDLGDHYLDCGDLSNALK	R	C	21	1	2370.07	Q13098-7;C9JFE4;A8K070;Q13098-5;Q13098;B4DND6;A0A096LP07;A0A096LPJ3;J3KSA5;J3KRJ4;Q13098-6;J3QLT0;Q59F65	Q13098-7	199	219	GPS1	COP9 signalosome complex subunit 1	63965000	171	4
849	SPPREGSQGELTPANSQSR	K	M	19	1	1996.96	Q13098-7;C9JFE4;A8K070;Q13098-5;Q13098;A0A096LP07;A0A096LPJ3;J3QQX0	Q13098-7	504	522	GPS1	COP9 signalosome complex subunit 1	11542000	171	1
901	TFNVDMYEEIHR	R	K	12	0	1552.7	Q13098-7;C9JFE4;A8K070;Q13098-5;Q13098;B4DND6;A0A096LP07;A0A096LPJ3;J3KSA5;J3KRJ4;J3QLT0;J3QS88;J3KTB0;J3QLE8;J3QL53;J3KRE8;J3QS84	Q13098-7	125	136	GPS1	COP9 signalosome complex subunit 1	43565000	171	2
902	TFNVDMYEEIHRK	R	L	13	1	1680.79	Q13098-7;C9JFE4;A8K070;Q13098-5;Q13098;B4DND6;A0A096LP07;A0A096LPJ3;J3KSA5;J3KRJ4;J3QLT0;J3QS88;J3KTB0;J3QLE8;J3QL53;J3KRE8;J3QS84	Q13098-7	125	137	GPS1	COP9 signalosome complex subunit 1	24501000	171	2
318	GAGTGGLGLAIEGPSEAK	R	M	18	0	1583.82	Q14315-2;Q14315	Q14315-2	1377	1394	FLNC	Filamin-C	1963400	172	0
453	ITESDLSQLTASIR	K	A	14	0	1532.8	Q14315-2;Q14315;Q59H94	Q14315-2	1936	1949	FLNC	Filamin-C	1095000	172	1
970	VAVGQEQAFSVNTR	K	G	14	0	1504.76	Q14315-2;Q14315	Q14315-2	978	991	FLNC	Filamin-C	1765700	172	1
14	ADDTFEALCIEPFSSPPELPDVMKPQDSGSSANEQAVQ	R	-	38	1	4105.84	Q15370;B8ZZU8;I3L0M9	Q15370	81	118	TCEB2	Transcription elongation factor B polypeptide 2	2701000000	173	3
154	DDQLLDDGK	K	T	9	0	1017.46	Q15370;B8ZZU8;Q15370-2	Q15370	47	55	TCEB2	Transcription elongation factor B polypeptide 2	9057300	173	1
155	DDQLLDDGKTLGECGFTSQTAR	K	P	22	1	2426.1	Q15370;B8ZZU8;Q15370-2	Q15370	47	68	TCEB2	Transcription elongation factor B polypeptide 2	4590700	173	1
255	ESSTVFELK	K	R	9	0	1038.52	Q15370;B8ZZU8;Q15370-2;I3L0M9;A0A0B4J296	Q15370	20	28	TCEB2	Transcription elongation factor B polypeptide 2	426070000	173	1
256	ESSTVFELKR	K	I	10	1	1194.62	Q15370;B8ZZU8;Q15370-2;I3L0M9;A0A0B4J296	Q15370	20	29	TCEB2	Transcription elongation factor B polypeptide 2	289570000	173	3
378	HKTTIFTDAK	R	E	10	1	1160.62	Q15370;B8ZZU8;Q15370-2;I3L0M9;A0A0B4J296	Q15370	10	19	TCEB2	Transcription elongation factor B polypeptide 2	52679000	173	4
379	HKTTIFTDAKESSTVFELK	R	R	19	2	2181.13	Q15370;B8ZZU8;Q15370-2;I3L0M9;A0A0B4J296	Q15370	10	28	TCEB2	Transcription elongation factor B polypeptide 2	2792700	173	1
459	IVEGILKRPPDEQR	R	L	14	2	1648.93	Q15370;B8ZZU8;Q15370-2;I3L0M9;A0A0B4J296	Q15370	30	43	TCEB2	Transcription elongation factor B polypeptide 2	29286000	173	2
608	LYKDDQLLDDGK	R	T	12	1	1421.7	Q15370;B8ZZU8;Q15370-2	Q15370	44	55	TCEB2	Transcription elongation factor B polypeptide 2	691020000	173	2
609	LYKDDQLLDDGKTLGECGFTSQTAR	R	P	25	2	2830.34	Q15370;B8ZZU8;Q15370-2	Q15370	44	68	TCEB2	Transcription elongation factor B polypeptide 2	121430000	173	1
628	MDVFLMIR	-	R	8	0	1023.52	Q15370;Q15370-2;A0A0B4J296	Q15370	1	8	TCEB2	Transcription elongation factor B polypeptide 2	1582800000	173	3
713	PQAPATVGLAFR	R	A	12	0	1226.68	Q15370;B8ZZU8;Q15370-2;I3L0M9	Q15370	69	80	TCEB2	Transcription elongation factor B polypeptide 2	505780000	173	3
770	RIVEGILK	K	R	8	1	926.591	Q15370;B8ZZU8;Q15370-2;I3L0M9;A0A0B4J296	Q15370	29	36	TCEB2	Transcription elongation factor B polypeptide 2	69764000	173	1
915	TLGECGFTSQTAR	K	P	13	0	1426.65	Q15370;B8ZZU8;Q15370-2;I3L0M9	Q15370	56	68	TCEB2	Transcription elongation factor B polypeptide 2	305110000	173	3
916	TLGECGFTSQTARPQAPATVGLAFR	K	A	25	1	2635.32	Q15370;B8ZZU8;Q15370-2;I3L0M9	Q15370	56	80	TCEB2	Transcription elongation factor B polypeptide 2	1431400000	173	5
949	TTIFTDAK	K	E	8	0	895.465	Q15370;B8ZZU8;Q15370-2;I3L0M9;A0A0B4J296	Q15370	12	19	TCEB2	Transcription elongation factor B polypeptide 2	489090000	173	2
950	TTIFTDAKESSTVFELK	K	R	17	1	1915.98	Q15370;B8ZZU8;Q15370-2;I3L0M9;A0A0B4J296	Q15370	12	28	TCEB2	Transcription elongation factor B polypeptide 2	48636000	173	1
951	TTIFTDAKESSTVFELKR	K	I	18	2	2072.08	Q15370;B8ZZU8;Q15370-2;I3L0M9;A0A0B4J296	Q15370	12	29	TCEB2	Transcription elongation factor B polypeptide 2	179420000	173	2
618	MAVETRAELVGK	-	R	12	1	1302.7	Q15652	Q15652	1	12	JMJD1C	Probable JmjC domain-containing histone demethylation protein 2C	0	174	1
65	ALVSEWKEPQAK	K	N	12	1	1384.74	Q16531;B4DZP5;B4DSA8;F5GY55;B7Z2A1;F5H6C5;F5H238;F5H775	Q16531	485	496	DDB1	DNA damage-binding protein 1	4725700	175	2
70	ALYYLQIHPQELR	R	Q	13	0	1642.88	Q16531;B4DZP5;B4DSA8;F5GY55;B7Z2A1;F5H6C5;F5H238;F5H775	Q16531	515	527	DDB1	DNA damage-binding protein 1	5943400	175	2
249	EMLGGEIIPR	K	S	10	0	1113.59	Q16531;B4DZP5;B4DSA8;F5GY55;B7Z2A1;F5H6C5;F5H775;F5H581	Q16531	580	589	DDB1	DNA damage-binding protein 1	1761500	175	1
289	FLYGCQAPTICFVYQDPQGR	K	H	20	0	2419.11	Q16531;F5GY55;B7Z2A1;F5H2L3	Q16531	169	188	DDB1	DNA damage-binding protein 1	1568600	175	1
405	IEVQDTSGGTTALRPSASTQALSSSVSSSK	R	L	30	1	2951.47	Q16531;B4DZP5;F5GY55;B7Z2A1;F5H581	Q16531	740	769	DDB1	DNA damage-binding protein 1	7428700	175	1
413	IGRPSETGIIGIIDPECR	R	M	18	1	1982.03	Q16531;F5GY55;B7Z2A1;F5H2L3;F5GWI0;F5GZY8	Q16531	112	129	DDB1	DNA damage-binding protein 1	10571000	175	0
462	IVVFQYSDGK	R	L	10	0	1154.6	Q16531;B4DZP5;B4DSA8;F5GY55;B7Z2A1;Q16531-2;F5H0Y5	Q16531	848	857	DDB1	DNA damage-binding protein 1	2195200	175	1
484	KICYQEVSQCFGVLSSR	R	I	17	1	2059.98	Q16531;B4DZP5;B4DSA8;F5GY55;B7Z2A1;F5H581	Q16531	723	739	DDB1	DNA damage-binding protein 1	8190500	175	1
500	KTEPATGFIDGDLIESFLDISRPK	R	M	24	2	2648.37	Q16531;B4DZP5;B4DSA8;Q16531-2;F8WF81;F5GZ34	Q16531	1081	1104	DDB1	DNA damage-binding protein 1	17100000	175	2
644	MQEVVANLQYDDGSGMKR	K	E	18	1	2039.94	Q16531;B4DZP5;B4DSA8;Q16531-2;F8WF81;F5GZ34	Q16531	1105	1122	DDB1	DNA damage-binding protein 1	6949000	175	1
726	QGQGQLVTCSGAFK	R	E	14	0	1479.71	Q16531;B4DSA8;F5GY55;B7Z2A1;F5H6C5;F5H238;B7Z859;F5H4N9	Q16531	370	383	DDB1	DNA damage-binding protein 1	4389800	175	0
797	SDPNRETDDTLVLSFVGQTR	R	V	20	1	2249.09	Q16531;B4DZP5;B4DSA8;F5GY55;B7Z2A1;F5H6C5;F5H238;B7Z859;F5H4N9	Q16531	415	434	DDB1	DNA damage-binding protein 1	7381200	175	0
879	SVLLLAYKPMEGNFEEIAR	R	D	19	1	2179.13	Q16531;B4DZP5;B4DSA8;F5GY55;B7Z2A1;Q16531-2;F5H0Y5	Q16531	929	947	DDB1	DNA damage-binding protein 1	2968600	175	1
899	TEPATGFIDGDLIESFLDISRPK	K	M	23	1	2520.27	Q16531;B4DZP5;B4DSA8;Q16531-2;F8WF81;F5GZ34	Q16531	1082	1104	DDB1	DNA damage-binding protein 1	2864500	175	0
913	TKGDFILVGDLMR	K	S	13	1	1463.78	Q16531;B4DZP5;B4DSA8;F5GY55;B7Z2A1;Q16531-2;F5H0Y5	Q16531	916	928	DDB1	DNA damage-binding protein 1	1966300	175	1
1042	VVEELTR	K	I	7	0	844.465	Q16531;B4DZP5;B4DSA8;Q16531-2;F8WF81;F5GZ34	Q16531	1132	1138	DDB1	DNA damage-binding protein 1	2729000	175	1
207	EAESCDCLQGFQLTHSLGGGTGSGMGTLLLSK	K	I	32	0	3310.53	Q3ZCM7;A0A075B736;Q5SQY0	Q3ZCM7	123	154	TUBB8	Tubulin beta-8 chain	316470000	177	1
473	KEAESCDCLQGFQLTHSLGGGTGSGMGTLLLSK	R	I	33	1	3438.62	Q3ZCM7;A0A075B736;Q5SQY0	Q3ZCM7	122	154	TUBB8	Tubulin beta-8 chain	128050000	177	2
215	ECELQGFDGGHR	K	K	12	0	1403.59	Q49MI3-9;Q49MI3	Q49MI3-9	174	185	CERKL	Ceramide kinase-like protein	13500000	178	1
94	ATAGDTHLGGEDFDNR	K	L	16	0	1674.72	Q53FC7;B3KSM6;B2R6X5;P48741;P17066;B4DNV4;B4DXY3;B4DI39;B4DWK5;Q53FA3;B2RCQ9;B4DI54;P34931;Q9UQC1;V9GZ37;B3KTT5;B4DVU9;B4E1S9;B4DHP5;B4DFN9;P0DMV8-2;P0DMV9;P0DMV8;A8K5I0;A0A0G2JIW1;Q59EJ3;B4E388;B4DNT8	Q53FC7	223	238	HSPA7;HSPA6;HSPA1L;HSP70-1;HSPA1A;HEL-S-103	Putative heat shock 70 kDa protein 7;Heat shock 70 kDa protein 6;Heat shock 70 kDa protein 1-like	2030100	69;51	1
979	VEILANDQGNR	R	T	11	0	1227.62	Q53FC7;B3KSM6;B2R6X5;P48741;P17066	Q53FC7	28	38	HSPA7;HSPA6	Putative heat shock 70 kDa protein 7;Heat shock 70 kDa protein 6	20592000	69	1
38	AGYAGEDCPKVDFPTAIGMVVER	R	D	23	1	2481.17	Q53FS0;O96019;Q6FI97;H7C5S0	Q53FS0	25	47	ACTL6A;BAF53A	Actin-like protein 6A	2773600	136	1
240	ELFQEMNIELVPPYMIASK	R	E	19	0	2251.13	Q53FS0;O96019;O96019-2;D3DNS0	Q53FS0	208	226	ACTL6A	Actin-like protein 6A	7329600	136	2
439	IPEGLFDPSNVK	K	G	12	0	1314.68	Q53FS0;O96019;Q6FI97;O96019-2;D3DNS0;O94805	Q53FS0	304	315	ACTL6A;BAF53A;ACTL6B	Actin-like protein 6A;Actin-like protein 6B	0	136	1
799	SEASLHPVLMSEAPWNTR	K	A	18	0	2023.98	Q53FS0;O96019;Q6FI97;O96019-2;H7C5S0	Q53FS0	113	130	ACTL6A;BAF53A	Actin-like protein 6A	14256000	136	1
872	STGLILDSGATHTTAIPVHDGYVLQQGIVK	R	S	30	0	3090.64	Q53FS0;O96019;Q6FI97;O96019-2	Q53FS0	165	194	ACTL6A;BAF53A	Actin-like protein 6A	11174000	136	1
972	VDFPTAIGMVVERDDGSTLMEIDGDKGK	K	Q	28	2	2994.43	Q53FS0;O96019;Q6FI97;H7C5S0	Q53FS0	35	62	ACTL6A;BAF53A	Actin-like protein 6A	4233600	136	1
89	ASLLQNESTNEQLQIHYK	R	V	18	0	2115.06	Q53FV3;Q9BT78;D6RFN0;B3KM48;D6RAX7;D6RD63;Q9BT78-2	Q53FV3	171	188	COPS4	COP9 signalosome complex subunit 4	26662000	179	3
98	ATTADGSSILDR	K	A	12	0	1205.59	Q53FV3;Q9BT78;B3KM48;D6RAX7;D6RD63;Q9BT78-2	Q53FV3	291	302	COPS4	COP9 signalosome complex subunit 4	28436000	179	1
108	AVIEHNLLSASK	R	L	12	0	1280.71	Q53FV3;Q9BT78;D6RFN0;B3KM48;D6RAX7;D6RD63;Q9BT78-2	Q53FV3	303	314	COPS4	COP9 signalosome complex subunit 4	13707000	179	1
130	CQQLAAYGILEK	R	M	12	0	1392.71	Q53FV3;Q9BT78;D6RFN0;B3KM48;D6RAX7;D6RD63;Q9BT78-2	Q53FV3	255	266	COPS4	COP9 signalosome complex subunit 4	28117000	179	1
348	GNQLQEFAAMLMPHQK	R	A	16	0	1841.89	Q53FV3;Q9BT78;D6RFN0;B3KM48;D6RAX7;D6RD63;Q9BT78-2	Q53FV3	275	290	COPS4	COP9 signalosome complex subunit 4	18457000	179	1
398	IASQMITEGR	K	M	10	0	1104.56	Q53FV3;Q9BT78;D6RFN0;B3KM48;D6RAX7;D6RD63	Q53FV3	338	347	COPS4	COP9 signalosome complex subunit 4	29508000	179	1
610	LYLEDDDPVQAEAYINR	R	A	17	0	2022.95	Q53FV3;Q9BT78;D6RFN0;B3KM48;D6RAX7;D6RD63;Q9BT78-2	Q53FV3	154	170	COPS4	COP9 signalosome complex subunit 4	63269000	179	3
612	LYNNITFEELGALLEIPAAK	K	A	20	0	2218.19	Q53FV3;Q9BT78;D6RFN0;D6RAX7;D6RD63;Q9BT78-2	Q53FV3	315	334	COPS4	COP9 signalosome complex subunit 4	69965000	179	2
613	LYNNITFEELGALLEIPAAKAEK	K	I	23	1	2546.36	Q53FV3;Q9BT78;D6RFN0;D6RAX7;D6RD63	Q53FV3	315	337	COPS4	COP9 signalosome complex subunit 4	4011600	179	1
636	MLATLFKDER	R	C	10	1	1222.64	Q53FV3;Q9BT78;D6RFN0;B3KM48;D6RAX7;D6RD63;Q9BT78-2	Q53FV3	245	254	COPS4	COP9 signalosome complex subunit 4	11540000	179	1
641	MNGFIDQIDGIVHFETR	R	E	17	0	1990.96	Q53FV3;Q9BT78;D6RFN0;B3KM48;D6RD63	Q53FV3	348	364	COPS4	COP9 signalosome complex subunit 4	17362000	179	1
662	NAAQVLVGIPLETGQK	R	Q	16	0	1636.91	Q53FV3;Q9BT78;D6RFN0;B3KM48;D6RAX7;Q9BT78-2	Q53FV3	122	137	COPS4	COP9 signalosome complex subunit 4	17724000	179	1
721	QDLAQLMNSSGSHKDLAGK	R	Y	19	1	1998.98	Q53FV3;Q9BT78;D6RFN0;B3KM48;D6RAX7;D6RD63;Q9BT78-2;D6REK7	Q53FV3	7	25	COPS4	COP9 signalosome complex subunit 4	0	179	1
729	QIQSLCFQVNNLLEK	K	I	15	0	1832.95	Q53FV3;Q9BT78;D6RFN0;B3KM48;D6RD63	Q53FV3	373	387	COPS4	COP9 signalosome complex subunit 4	28593000	179	2
736	QLLTDFCTHLPNLPDSTAK	R	E	19	0	2170.07	Q53FV3;Q9BT78;D6RFN0;B3KM48;D6RAX7;Q9BT78-2	Q53FV3	64	82	COPS4	COP9 signalosome complex subunit 4	26195000	179	1
1003	VISFEEQVASIR	R	Q	12	0	1376.73	Q53FV3;Q9BT78;D6RFN0;B3KM48;D6RAX7;Q9BT78-2	Q53FV3	96	107	COPS4	COP9 signalosome complex subunit 4	24648000	179	1
102	AVCMLSNTTAVAEAWAR	R	L	17	0	1849.88	Q53GA7;F5H5D3;B7Z1K5;Q9BQE3;Q8N532	Q53GA7	374	390	TUBA1C	Tubulin alpha-1C chain	11888000	91	2
783	RTIQFVDWCPTGFK	K	V	14	1	1753.86	Q53GA7;F5H5D3;B7Z1K5;Q9BQE3;Q8N532	Q53GA7	339	352	TUBA1C	Tubulin alpha-1C chain	2820800	91	1
33	AGFAGDDAPR	K	A	10	0	975.441	B7Z6P1;B3KW67;D2JYH4;A8K3K1;P63267;P68133;P68032;P62736;F8WB63;B8ZZJ2;C9JFL5;F6UVQ4;F6QUT6;B7Z6I1;Q7Z7J6;A6NL76;Q13707;B3KUD3;C9JUM1;P63267-2;A5A3E0;F8WCH0;P0CG38;L0R5C4;P0CG39;Q53GK6;Q53G99;Q53G76;Q1KLZ0;P60709;B4DW52;B4E335;Q8WVW5;P63261;B4DVQ0;B4E3A4;I3L4N8;G5E9R0;E7EVS6;I3L3I0;I3L1U9;Q6S8J3;C9JTX5;C9JZR7;A1E282;K7EM38;I3L3R2;J3KT65	Q53GK6	19	28	ACTA2;ACTG2;ACTA1;ACTC1;ACTB;POTEF;POTEI;POTEM;POTEJ;PS1TP5BP1;ACTG1;POTEE	Actin, gamma-enteric smooth muscle;Actin, alpha skeletal muscle;Actin, alpha cardiac muscle 1;Actin, aortic smooth muscle;POTE ankyrin domain family member F;POTE ankyrin domain family member I;POTE ankyrin domain family member J;Actin, cytoplasmic 1;Actin, cytoplasmic 1, N-terminally processed;Actin, cytoplasmic 2;Actin, cytoplasmic 2, N-terminally processed;POTE ankyrin domain family member E	31553000	153;58	1
104	AVFPSIVGRPR	R	H	11	1	1197.7	B7Z6P1;B3KW67;D2JYH4;A8K3K1;P63267;P68133;P68032;P62736;F8WB63;B8ZZJ2;C9JFL5;F6UVQ4;F6QUT6;B7Z6I1;Q7Z7J6;A6NL76;Q13707;B3KUD3;C9JUM1;P63267-2;A5A3E0;F8WCH0;P0CG38;Q53GK6;Q53G99;Q53G76;Q1KLZ0;P60709;B4DW52;B4E335;Q8WVW5;P63261;B4DVQ0;B4E3A4;I3L4N8;G5E9R0;E7EVS6;I3L3I0;I3L1U9;Q6S8J3;C9JTX5;C9JZR7;A1E282;K7EM38;I3L3R2;J3KT65	Q53GK6	29	39	ACTA2;ACTG2;ACTA1;ACTC1;ACTB;POTEF;POTEI;PS1TP5BP1;ACTG1;POTEE	Actin, gamma-enteric smooth muscle;Actin, alpha skeletal muscle;Actin, alpha cardiac muscle 1;Actin, aortic smooth muscle;POTE ankyrin domain family member F;POTE ankyrin domain family member I;Actin, cytoplasmic 1;Actin, cytoplasmic 1, N-terminally processed;Actin, cytoplasmic 2;Actin, cytoplasmic 2, N-terminally processed;POTE ankyrin domain family member E	35228000	153;58	1
127	CPEALFQPSFLGMESCGIHETTFNSIMK	R	C	28	0	3230.45	Q53GK6;Q53G99;Q53G76;Q1KLZ0;P60709;B4DW52;B4E335;Q8WVW5;P63261;B4DVQ0;B4E3A4;B3KWQ3;Q6PJ43;B7ZAP6;A4UCT3;A5GZ75;Q96FU6;V9HVZ7;F1BXA6;Q96DE1	Q53GK6	257	284	PS1TP5BP1;ACTB;ACTG1;HEL-176	Actin, cytoplasmic 1;Actin, cytoplasmic 1, N-terminally processed;Actin, cytoplasmic 2;Actin, cytoplasmic 2, N-terminally processed	15263000	153	1
150	DDDIAALVVDNGSGMCK	M	A	17	0	1778.78	Q53GK6;Q53G99;Q53G76;Q1KLZ0;P60709;B4DW52;B4E335;G5E9R0;E7EVS6;C9JTX5;C9JZR7	Q53GK6	2	18	PS1TP5BP1;ACTB	Actin, cytoplasmic 1;Actin, cytoplasmic 1, N-terminally processed	8186800	153	2
179	DLYANTVLSGGTTMYPGIADR	K	M	21	0	2214.06	Q53GK6;Q53G99;Q53G76;Q1KLZ0;P60709;B4DW52;B4E335;Q8WVW5;P63261;B4DVQ0;B4E3A4;B3KWQ3;Q6PJ43;B7ZAP6;A4UCT3;A5GZ75;Q96FU6;V9HVZ7;F1BXA6;Q96DE1;Q9UE89	Q53GK6	292	312	PS1TP5BP1;ACTB;ACTG1;HEL-176	Actin, cytoplasmic 1;Actin, cytoplasmic 1, N-terminally processed;Actin, cytoplasmic 2;Actin, cytoplasmic 2, N-terminally processed	6003100	153	1
195	DSYVGDEAQSKR	K	G	12	1	1353.62	B7Z6P1;B3KW67;D2JYH4;A8K3K1;P63267;P68133;P68032;P62736;F8WB63;B8ZZJ2;C9JFL5;F6UVQ4;F6QUT6;B7Z6I1;Q7Z7J6;A6NL76;B3KUD3;C9JUM1;B4DUI8;Q53GK6;Q53G99;Q53G76;Q1KLZ0;P60709;B4E335;Q8WVW5;P63261;B4DVQ0;B4E3A4;G5E9R0;E7EVS6;I3L3I0;I3L1U9;C9JTX5;C9JZR7;A1E282;K7EM38;I3L3R2;J3KT65	Q53GK6	51	62	ACTA2;ACTG2;ACTA1;ACTC1;ACTB;PS1TP5BP1;ACTG1	Actin, gamma-enteric smooth muscle;Actin, alpha skeletal muscle;Actin, alpha cardiac muscle 1;Actin, aortic smooth muscle;Actin, cytoplasmic 1;Actin, cytoplasmic 1, N-terminally processed;Actin, cytoplasmic 2;Actin, cytoplasmic 2, N-terminally processed	12087000	153;58	1
236	EKLCYVALDFEQEMATAASSSSLEK	K	S	25	1	2806.3	Q53GK6;Q53G99;Q53G76;Q1KLZ0;P60709;B4DW52;B4E335;Q8WVW5;P63261;B4DVQ0;B4E3A4;B3KWQ3;Q6PJ43;B7ZAP6;A4UCT3;A5GZ75;Q96FU6;V9HVZ7;I3L4N8;Q6S8J3;G8FSY7	Q53GK6	214	238	PS1TP5BP1;ACTB;ACTG1;HEL-176;POTEE	Actin, cytoplasmic 1;Actin, cytoplasmic 1, N-terminally processed;Actin, cytoplasmic 2;Actin, cytoplasmic 2, N-terminally processed;POTE ankyrin domain family member E	9940900	153	1
295	FRCPEALFQPSFLGMESCGIHETTFNSIMK	R	C	30	1	3533.62	Q53GK6;Q53G99;Q53G76;Q1KLZ0;P60709;B4DW52;B4E335;Q8WVW5;P63261;B4DVQ0;B4E3A4;B3KWQ3;Q6PJ43;B7ZAP6;A4UCT3;A5GZ75;Q96FU6;V9HVZ7;F1BXA6;Q96DE1	Q53GK6	255	284	PS1TP5BP1;ACTB;ACTG1;HEL-176	Actin, cytoplasmic 1;Actin, cytoplasmic 1, N-terminally processed;Actin, cytoplasmic 2;Actin, cytoplasmic 2, N-terminally processed	4697900	153	1
525	LCYVALDFEQEMATAASSSSLEK	K	S	23	0	2549.17	Q53GK6;Q53G99;Q53G76;Q1KLZ0;P60709;B4DW52;B4E335;Q8WVW5;P63261;B4DVQ0;B4E3A4;B3KWQ3;Q6PJ43;B7ZAP6;A4UCT3;A5GZ75;Q96FU6;V9HVZ7;I3L4N8;Q6S8J3;G8FSY7	Q53GK6	216	238	PS1TP5BP1;ACTB;ACTG1;HEL-176;POTEE	Actin, cytoplasmic 1;Actin, cytoplasmic 1, N-terminally processed;Actin, cytoplasmic 2;Actin, cytoplasmic 2, N-terminally processed;POTE ankyrin domain family member E	14938000	153	2
885	SYELPDGQVITIGNER	K	F	16	0	1789.88	B7Z6P1;B3KW67;D2JYH4;A8K3K1;P63267;P68133;P68032;P62736;Q13707;B3KUD3;B4DUI8;P63267-2;A5A3E0;K4EQ44;K4EP00;K4ENJ5;B3KPP5;Q9BYX7;Q562R1;Q53GK6;Q53G99;Q53G76;Q1KLZ0;P60709;B4DW52;B4E335;Q8WVW5;P63261;B4DVQ0;B4E3A4;B3KWQ3;Q6PJ43;B7ZAP6;A4UCT3;A5GZ75;Q96FU6;V9HVZ7;Q6S8J3;F1BXA6;Q96DE1;G8FSY7	Q53GK6	239	254	ACTA2;ACTG2;ACTA1;ACTC1;POTEF;POTEKP;ACTBL2;PS1TP5BP1;ACTB;ACTG1;HEL-176;POTEE	Actin, gamma-enteric smooth muscle;Actin, alpha skeletal muscle;Actin, alpha cardiac muscle 1;Actin, aortic smooth muscle;POTE ankyrin domain family member F;Putative beta-actin-like protein 3;Beta-actin-like protein 2;Actin, cytoplasmic 1;Actin, cytoplasmic 1, N-terminally processed;Actin, cytoplasmic 2;Actin, cytoplasmic 2, N-terminally processed;POTE ankyrin domain family member E	71949000	153;58	2
948	TTGIVMDSGDGVTHTVPIYEGYALPHAILR	R	L	30	0	3182.61	Q53GK6;Q53G99;Q53G76;Q1KLZ0;P60709;B4DW52;Q8WVW5;P63261;B3KWQ3;Q6PJ43;B7ZAP6;I3L4N8;I3L3I0;I3L1U9;Q562Z7;Q562Y6;Q562X9;Q562S0;Q562R8;Q562P0;Q562N8;Q562N0;Q562L9;Q562L5;Q562Z6;Q562Y8;Q562N2;Q562M5;Q562M3;A0AUL6	Q53GK6	148	177	PS1TP5BP1;ACTB;ACTG1;ACT	Actin, cytoplasmic 1;Actin, cytoplasmic 1, N-terminally processed;Actin, cytoplasmic 2;Actin, cytoplasmic 2, N-terminally processed	15060000	153	3
965	VAPEEHPVLLTEAPLNPK	R	A	18	0	1953.06	Q53GK6;Q53G99;Q53G76;Q1KLZ0;P60709;B4DW52;B4E335;Q8WVW5;P63261;B4DVQ0;B4E3A4;I3L4N8;G5E9R0;E7EVS6;I3L3I0;I3L1U9;A1E282;K7EM38;I3L3R2;J3KT65;Q562Z7;Q562Y6;Q562X9;Q562S0;Q562R8;Q562P0;Q562N8;Q562N0;Q562L9;Q562L5;Q562Z4;Q562V5;Q562U2;Q562P9;Q562N6;Q562N4;Q562L6	Q53GK6	96	113	PS1TP5BP1;ACTB;ACTG1;ACT	Actin, cytoplasmic 1;Actin, cytoplasmic 1, N-terminally processed;Actin, cytoplasmic 2;Actin, cytoplasmic 2, N-terminally processed	89592000	153	1
491	KLISEVDSDGDGEISFQEFLTAAK	R	K	24	1	2598.27	Q53H37;Q9NZT1	Q53H37	51	74	CALML5	Calmodulin-like protein 5	3109900	180	1
464	KAAAPAPEEEMDECEQALAAEPK	K	A	23	1	2484.11	Q53YD7;P26641;P26641-2;Q2F840	Q53YD7	253	275	EEF1G	Elongation factor 1-gamma	3355200	148	1
870	STFVLDEFKR	K	K	10	1	1240.65	Q53YD7;P26641;P26641-2;B4DUP0	Q53YD7	286	295	EEF1G	Elongation factor 1-gamma	2169900	148	1
25	AEAGVPAEFSIWTR	R	E	14	0	1532.76	Q5HY54;P21333-2;P21333;Q8TES4;Q6NXF2;Q96C61;B4E2F9;B4DTD5;H0Y5C6;Q2VP91;Q60FE6;Q60FE5	Q5HY54	2211	2224	FLNA;FLJ00119	Filamin-A	64890000	147;182	2
26	AEISFEDRK	K	D	9	1	1093.54	Q5HY54;P21333-2;P21333;Q8TES4;Q6NXF2;Q96C61;B4E2F9;B4DTD5;H0Y5C6;Q2VP91;Q60FE6;Q60FE5	Q5HY54	2241	2249	FLNA;FLJ00119	Filamin-A	7304800	147;182	1
30	AFGPGLQGGSAGSPAR	K	F	16	0	1428.71	Q5HY54;P21333-2;P21333;Q60FE6;Q60FE5;A6NDY9;A0A087WWY3	Q5HY54	1072	1087	FLNA	Filamin-A	45605000	147;182	1
34	AGNNMLLVGVHGPR	K	T	14	0	1433.76	Q5HY54;P21333-2;P21333;Q8TES4;Q6NXF2;Q96C61;B4E2F9;Q86TQ3;Q60FE6;Q60FE5;A6NDY9;A0A087WWY3	Q5HY54	2545	2558	FLNA;FLJ00119	Filamin-A	36451000	147;182	2
35	AGQSAAGAAPGGGVDTR	R	D	17	0	1441.69	Q5HY54;P21333-2;P21333	Q5HY54	8	24	FLNA	Filamin-A	6788200	147	1
46	AHVVPCFDASK	K	V	11	0	1229.59	Q5HY54;P21333-2;P21333;Q60FE6;Q60FE5;A6NDY9;A0A087WWY3	Q5HY54	1152	1162	FLNA	Filamin-A	12346000	147;182	1
61	ALTQTGGPHVK	R	A	11	0	1107.6	Q5HY54;P21333-2;P21333;Q8TES4;Q60FE6;Q60FE5;A6NDY9;A0A087WWY3	Q5HY54	1284	1294	FLNA;FLJ00119	Filamin-A	35656000	147;182	1
75	ANLPQSFQVDTSK	R	A	13	0	1433.72	Q5HY54;P21333-2;P21333;Q8TES4;Q60FE6;Q60FE5;A6NDY9;A0A087WWY3	Q5HY54	1465	1477	FLNA;FLJ00119	Filamin-A	44287000	147;182	1
116	AYGPGIEPTGNMVK	R	K	14	0	1432.7	Q5HY54;P21333-2;P21333;F8WE98;Q60FE6;Q60FE5;A6NDY9;A0A087WWY3	Q5HY54	286	299	FLNA	Filamin-A	42792000	147;182	1
118	CAPGVVGPAEADIDFDIIR	K	N	19	0	2013.98	Q5HY54;P21333-2;P21333;Q60FE6;Q60FE5;A6NDY9;A0A087WWY3	Q5HY54	810	828	FLNA	Filamin-A	6704400	147;182	2
131	CSGPGLER	K	A	8	0	874.397	Q5HY54;P21333-2;P21333;Q60FE6;Q60FE5;A6NDY9;A0A087WWY3	Q5HY54	1165	1172	FLNA	Filamin-A	10260000	147;182	1
132	CSGPGLSPGMVR	K	A	12	0	1216.57	Q5HY54;P21333-2;P21333;Q8TES4;Q60FE6;Q60FE5;A6NDY9;A0A087WWY3	Q5HY54	1453	1464	FLNA;FLJ00119	Filamin-A	22026000	147;182	1
133	CSYQPTMEGVHTVHVTFAGVPIPR	R	S	24	0	2682.3	Q5HY54;P21333-2;P21333;F8WE98;Q60FE6;Q60FE5;A6NDY9;A0A087WWY3	Q5HY54	444	467	FLNA	Filamin-A	14875000	147;182	2
140	DAEMPATEKDLAEDAPWK	R	K	18	1	2015.91	Q5HY54;P21333-2;P21333;F8WE98	Q5HY54	25	42	FLNA	Filamin-A	1379200	147	1
141	DAEMPATEKDLAEDAPWKK	R	I	19	2	2144.01	Q5HY54;P21333-2;P21333;F8WE98	Q5HY54	25	43	FLNA	Filamin-A	4980800	147	2
142	DAGEGGLSLAIEGPSK	K	A	16	0	1499.75	Q5HY54;P21333-2;P21333;Q8TES4;Q6NXF2;Q96C61;B4DTD5;Q60FE6;Q60FE5;A6NDY9;A0A087WWY3	Q5HY54	1852	1867	FLNA;FLJ00119	Filamin-A	9600800	147;182	1
143	DAGEGLLAVQITDPEGKPK	K	K	19	1	1937.01	Q5HY54;P21333-2;P21333;Q8TES4;Q60FE6;Q60FE5;A6NDY9;A0A087WWY3	Q5HY54	1574	1592	FLNA;FLJ00119	Filamin-A	27785000	147;182	2
145	DAGYGGLSLSIEGPSKVDINTEDLEDGTCR	R	V	30	1	3167.46	Q5HY54;P21333-2;P21333;Q8TES4;Q6NXF2;Q96C61;B4E2F9;B4DTD5;H0Y5C6;Q60FE6;Q60FE5	Q5HY54	2034	2063	FLNA;FLJ00119	Filamin-A	6236000	147;182	1
146	DAPQDFHPDR	R	V	10	0	1196.52	Q5HY54;P21333-2;P21333;Q60FE6;Q60FE5;A6NDY9;A0A087WWY3	Q5HY54	665	674	FLNA	Filamin-A	7722000	147;182	1
167	DGSCGVAYVVQEPGDYEVSVK	K	F	21	0	2257.02	Q5HY54;P21333-2;P21333;Q8TES4;Q6NXF2;Q96C61;B4E2F9;B4DTD5;H0Y5C6;Q2VP91;Q60FE6;Q60FE5;A6NDY9;A0A087WWY3	Q5HY54	2250	2270	FLNA;FLJ00119	Filamin-A	13273000	147;182	1
171	DKGEYTLVVK	K	W	10	1	1150.62	Q5HY54;P21333-2;P21333;Q8TES4;Q6NXF2;Q96C61;B4E2F9;Q86TQ3;Q60FE6;Q60FE5;A6NDY9;A0A087WWY3	Q5HY54	2582	2591	FLNA;FLJ00119	Filamin-A	21376000	147;182	1
172	DLAEDAPWKK	K	I	10	1	1171.59	Q5HY54;P21333-2;P21333;F8WE98;Q60FE6;Q60FE5;A6NDY9;A0A087WWY3;O75369-6;O75369-3;O75369-2;O75369-9;O75369;O75369-8;A0A024R321;O75369-5;O75369-4;Q14315-2;Q14315	Q5HY54	34	43	FLNA;FLNB;FLNC	Filamin-A;Filamin-B;Filamin-C	2137700	147;182;135;172	1
199	DVDIIDHHDNTYTVK	R	Y	15	0	1783.84	Q5HY54;P21333-2;P21333;Q60FE6;Q60FE5;A6NDY9;A0A087WWY3	Q5HY54	922	936	FLNA	Filamin-A	32387000	147;182	2
210	EAGAGGLAIAVEGPSKAEISFEDRK	R	D	25	2	2501.28	Q5HY54;P21333-2;P21333;Q8TES4;Q6NXF2;Q96C61;B4E2F9;B4DTD5;H0Y5C6;Q2VP91;Q60FE6;Q60FE5	Q5HY54	2225	2249	FLNA;FLJ00119	Filamin-A	14993000	147;182	1
211	EAMQQADDWLGIPQVITPEEIVDPNVDEHSVMTYLSQFPK	R	A	40	0	4569.17	Q5HY54;P21333-2;P21333;F8WE98;Q60FE6;Q60FE5;A6NDY9;A0A087WWY3	Q5HY54	227	266	FLNA	Filamin-A	66105000	147;182	1
225	EGPYSISVLYGDEEVPR	R	S	17	0	1908.91	Q5HY54;P21333-2;P21333;Q8TES4;Q60FE6;Q60FE5;A6NDY9;A0A087WWY3	Q5HY54	1516	1532	FLNA;FLJ00119	Filamin-A	29596000	147;182	2
226	EGPYSISVLYGDEEVPRSPFK	R	V	21	1	2368.16	Q5HY54;P21333-2;P21333;Q8TES4;Q60FE6;Q60FE5;A6NDY9;A0A087WWY3	Q5HY54	1516	1536	FLNA;FLJ00119	Filamin-A	11452000	147;182	1
258	ETGEHLVHVK	K	K	10	0	1147.6	Q5HY54;P21333-2;P21333;Q8TES4;Q6NXF2;Q96C61;B4E2F9;B4DTD5;Q60FE6;Q60FE5	Q5HY54	1975	1984	FLNA;FLJ00119	Filamin-A	3112400	147;182	1
288	FLPREEGPYEVEVTYDGVPVPGSPFPLEAVAPTKPSK	R	V	37	2	3998.04	Q5HY54;P21333-2;P21333;Q60FE6;Q60FE5;A6NDY9;A0A087WWY3	Q5HY54	1033	1069	FLNA	Filamin-A	33623000	147;182	3
291	FNEEHIPDSPFVVPVASPSGDAR	K	R	23	0	2466.18	Q5HY54;P21333-2;P21333;Q8TES4;Q6NXF2;Q96C61;B4E2F9;B4DTD5;H0Y5C6;Q2VP91;Q60FE6;Q60FE5;A6NDY9;A0A087WWY3	Q5HY54	2271	2293	FLNA;FLJ00119	Filamin-A	53442000	147;182	1
292	FNGTHIPGSPFK	K	I	12	0	1300.66	Q5HY54;P21333-2;P21333;Q8TES4;Q6NXF2;Q96C61;B4E2F9;B4DTD5;Q60FE6;Q60FE5;A6NDY9;A0A087WWY3	Q5HY54	2366	2377	FLNA;FLJ00119	Filamin-A	8099600	147;182	2
316	GAGSGELKVTVK	K	G	12	1	1144.65	Q5HY54;P21333-2;P21333;F8WE98;Q60FE6;Q60FE5;A6NDY9;A0A087WWY3;Q14315-2;Q14315	Q5HY54	509	520	FLNA;FLNC	Filamin-A;Filamin-C	1529500	147;182;172	0
317	GAGSYTIMVLFADQATPTSPIR	R	V	22	0	2295.16	Q5HY54;P21333-2;P21333;Q60FE6;Q60FE5;A6NDY9;A0A087WWY3	Q5HY54	842	863	FLNA	Filamin-A	18351000	147;182	2
338	GKLDVQFSGLTK	K	G	12	1	1291.71	Q5HY54;P21333-2;P21333;Q60FE6;Q60FE5;A6NDY9;A0A087WWY3	Q5HY54	905	916	FLNA	Filamin-A	26159000	147;182	2
343	GLVEPVDVVDNADGTQTVNYVPSR	K	E	24	0	2543.25	Q5HY54;P21333-2;P21333;Q8TES4;Q60FE6;Q60FE5;A6NDY9;A0A087WWY3	Q5HY54	1492	1515	FLNA;FLJ00119	Filamin-A	32910000	147;182	1
354	GQHVPGSPFQFTVGPLGEGGAHK	K	V	23	0	2303.14	Q5HY54;P21333-2;P21333;Q8TES4;Q6NXF2;Q96C61;B4E2F9;B4DTD5;H0Y5C6;Q2VP91;Q60FE6;Q60FE5;Q14315-2;Q14315;Q59H94	Q5HY54	2178	2200	FLNA;FLJ00119;FLNC	Filamin-A;Filamin-C	3279900	147;182;172	1
360	GTVEPQLEAR	K	G	10	0	1098.57	Q5HY54;P21333-2;P21333;F8WE98;Q60FE6;Q60FE5;A6NDY9;A0A087WWY3	Q5HY54	428	437	FLNA	Filamin-A	29549000	147;182	1
390	HTAMVSWGGVSIPNSPFR	K	V	18	0	1941.95	Q5HY54;P21333-2;P21333;Q60FE6;Q60FE5;A6NDY9;A0A087WWY3	Q5HY54	743	760	FLNA	Filamin-A	12262000	147;182	1
397	IANLQTDLSDGLR	R	L	13	0	1414.74	Q5HY54;P21333-2;P21333;F8WE98;Q60FE6;Q60FE5;A6NDY9;A0A087WWY3	Q5HY54	64	76	FLNA	Filamin-A	25557000	147;182	1
440	IPEISIQDMTAQVTSPSGK	K	T	19	0	2001.01	Q5HY54;P21333-2;P21333;Q8TES4;Q6NXF2;Q96C61;B4E2F9;B4DTD5;Q2VP91;Q60FE6;Q60FE5	Q5HY54	2126	2144	FLNA;FLJ00119	Filamin-A	2995700	147;182	1
460	IVGPSGAAVPCKVEPGLGADNSVVR	K	F	25	1	2448.28	Q5HY54;P21333-2;P21333;Q60FE6;Q60FE5;A6NDY9;A0A087WWY3	Q5HY54	1008	1032	FLNA	Filamin-A	74889000	147;182	1
470	KDGSCGVAYVVQEPGDYEVSVK	R	F	22	1	2385.12	Q5HY54;P21333-2;P21333;Q8TES4;Q6NXF2;Q96C61;B4E2F9;B4DTD5;H0Y5C6;Q2VP91;Q60FE6;Q60FE5;A6NDY9;A0A087WWY3	Q5HY54	2249	2270	FLNA;FLJ00119	Filamin-A	8796300	147;182	1
481	KGEITGEVR	K	M	9	1	987.535	Q5HY54;P21333-2;P21333;Q8TES4;Q6NXF2;H0Y5F3;Q60FE6;Q60FE5;A6NDY9;A0A087WWY3	Q5HY54	1761	1769	FLNA;FLJ00119	Filamin-A	13564000	147;182	1
501	KTHIQDNHDGTYTVAYVPDVTGR	K	Y	23	1	2586.25	Q5HY54;P21333-2;P21333;Q8TES4;Q60FE6;Q60FE5;A6NDY9;A0A087WWY3	Q5HY54	1593	1615	FLNA;FLJ00119	Filamin-A	16830000	147;182	2
552	LIALLEVLSQK	R	K	11	0	1225.76	Q5HY54;P21333-2;P21333;F8WE98;Q60FE6;Q60FE5;A6NDY9;A0A087WWY3;O75369-6;O75369-3;O75369-2;O75369-9;O75369;O75369-8;A0A024R321;O75369-5;O75369-4;Q14315-2;Q14315	Q5HY54	77	87	FLNA;FLNB;FLNC	Filamin-A;Filamin-B;Filamin-C	16571000	147;182;135;172	2
566	LLGWIQNK	R	L	8	0	970.56	Q5HY54;P21333-2;P21333;F8WE98;Q60FE6;Q60FE5;A6NDY9;A0A087WWY3;O75369-6;O75369-3;O75369-2;O75369-9;O75369;O75369-8;A0A024R321;O75369-5;O75369-4;Q14315-2;Q14315	Q5HY54	172	179	FLNA;FLNB;FLNC	Filamin-A;Filamin-B;Filamin-C	7172700	147;182;135;172	1
584	LSPFMADIR	R	D	9	0	1048.54	Q5HY54;P21333-2;P21333;Q60FE6;Q60FE5;A6NDY9;A0A087WWY3	Q5HY54	656	664	FLNA	Filamin-A	27607000	147;182	1
599	LVSNHSLHETSSVFVDSLTK	R	A	20	0	2199.12	Q5HY54;P21333-2;P21333;Q8TES4;Q6NXF2;Q96C61;B4E2F9;Q86TQ3;Q60FE6;Q60FE5;A6NDY9;A0A087WWY3	Q5HY54	2481	2500	FLNA;FLJ00119	Filamin-A	52513000	147;182	3
619	MDCQECPEGYR	K	V	11	0	1443.52	Q5HY54;P21333-2;P21333;Q8TES4;Q6NXF2;Q96C61;B4E2F9;Q86TQ3;Q60FE6;Q60FE5;A6NDY9;A0A087WWY3	Q5HY54	2434	2444	FLNA;FLJ00119	Filamin-A	6904000	147;182	1
669	NGQHVASSPIPVVISQSEIGDASR	K	V	24	0	2447.24	Q5HY54;P21333-2;P21333;Q8TES4;Q6NXF2;Q96C61;B4E2F9;B4DTD5;H0Y5C6;Q60FE6;Q60FE5	Q5HY54	1986	2009	FLNA;FLJ00119	Filamin-A	4081800	147;182	1
768	RIANLQTDLSDGLR	K	L	14	1	1570.84	Q5HY54;P21333-2;P21333;F8WE98;Q60FE6;Q60FE5;A6NDY9;A0A087WWY3	Q5HY54	63	76	FLNA	Filamin-A	0	147;182	1
775	RLTVSSLQESGLK	R	V	13	1	1416.79	Q5HY54;P21333-2;P21333;Q8TES4;Q6NXF2;Q96C61;B4DTD5;Q60FE6;Q60FE5;A6NDY9;A0A087WWY3	Q5HY54	2294	2306	FLNA;FLJ00119	Filamin-A	5886600	147;182	2
787	SAGQGEVLVYVEDPAGHQEEAK	R	V	22	0	2312.09	Q5HY54;P21333-2;P21333;F8WE98;Q60FE6;Q60FE5;A6NDY9;A0A087WWY3	Q5HY54	310	331	FLNA	Filamin-A	54556000	147;182	2
846	SPFEVYVDKSQGDASK	K	V	16	1	1755.83	Q5HY54;P21333-2;P21333;F8WE98;Q60FE6;Q60FE5;A6NDY9;A0A087WWY3	Q5HY54	368	383	FLNA	Filamin-A	17354000	147;182	2
847	SPFSVAVSPSLDLSK	K	I	15	0	1532.81	Q5HY54;P21333-2;P21333;Q60FE6;Q60FE5;A6NDY9;A0A087WWY3	Q5HY54	959	973	FLNA	Filamin-A	47544000	147;182	1
852	SPYTVTVGQACNPSACR	R	A	17	0	1866.84	Q5HY54;P21333-2;P21333;F8WE98;Q60FE6;Q60FE5;A6NDY9;A0A087WWY3	Q5HY54	468	484	FLNA	Filamin-A	28248000	147;182	2
903	TFSVWYVPEVTGTHK	R	V	15	0	1749.87	Q5HY54;P21333-2;P21333;F8WE98;Q60FE6;Q60FE5;A6NDY9;A0A087WWY3	Q5HY54	341	355	FLNA	Filamin-A	3756900	147;182	1
904	TGVAVNKPAEFTVDAK	K	H	16	1	1645.87	Q5HY54;P21333-2;P21333;Q60FE6;Q60FE5;A6NDY9;A0A087WWY3	Q5HY54	685	700	FLNA	Filamin-A	48498000	147;182	1
905	THEAEIVEGENHTYCIR	K	F	17	0	2056.93	Q5HY54;P21333-2;P21333;Q8TES4;Q6NXF2;Q96C61;B4E2F9;B4DTD5;H0Y5C6;Q2VP91;Q60FE6;Q60FE5	Q5HY54	2145	2161	FLNA;FLJ00119	Filamin-A	2469400	147;182	1
906	THIQDNHDGTYTVAYVPDVTGR	K	Y	22	0	2458.15	Q5HY54;P21333-2;P21333;Q8TES4;Q60FE6;Q60FE5;A6NDY9;A0A087WWY3	Q5HY54	1594	1615	FLNA;FLJ00119	Filamin-A	3404100	147;182	2
930	TPCEEILVK	R	H	9	0	1087.56	Q5HY54;P21333-2;P21333;Q8TES4;Q6NXF2;Q96C61;B4E2F9;Q86TQ3;Q60FE6;Q60FE5;A6NDY9;A0A087WWY3	Q5HY54	2559	2567	FLNA;FLJ00119	Filamin-A	32835000	147;182	1
967	VAQPTITDNK	K	D	10	0	1085.57	Q5HY54;P21333-2;P21333;Q8TES4;Q6NXF2;Q96C61;B4E2F9;B4DTD5;H0Y5F3;Q60FE6;Q60FE5;A6NDY9;A0A087WWY3	Q5HY54	1775	1784	FLNA;FLJ00119	Filamin-A	2688000	147;182	1
968	VAQPTITDNKDGTVTVR	K	Y	17	1	1813.95	Q5HY54;P21333-2;P21333;Q8TES4;Q6NXF2;Q96C61;B4E2F9;B4DTD5;H0Y5F3;Q60FE6;Q60FE5;A6NDY9;A0A087WWY3	Q5HY54	1775	1791	FLNA;FLJ00119	Filamin-A	27775000	147;182	1
978	VDVGKDQEFTVK	K	S	12	1	1363.7	Q5HY54;P21333-2;P21333;Q60FE6;Q60FE5;A6NDY9;A0A087WWY3	Q5HY54	983	994	FLNA	Filamin-A	26882000	147;182	1
980	VEPGLGADNSVVR	K	F	13	0	1311.68	Q5HY54;P21333-2;P21333;Q60FE6;Q60FE5;A6NDY9;A0A087WWY3	Q5HY54	1020	1032	FLNA	Filamin-A	12633000	147;182	1
985	VEYTPYEEGLHSVDVTYDGSPVPSSPFQVPVTEGCDPSR	K	V	39	0	4295.95	Q5HY54;P21333-2;P21333;Q8TES4;Q60FE6;Q60FE5;A6NDY9;A0A087WWY3	Q5HY54	1319	1357	FLNA;FLJ00119	Filamin-A	5965200	147;182	1
989	VGSAADIPINISETDLSLLTATVVPPSGR	K	E	29	0	2892.54	Q5HY54;P21333-2;P21333;Q8TES4;Q6NXF2;Q96C61;B4E2F9;B4DTD5;H0Y5F3;H7C2E7;Q60FE6;Q60FE5	Q5HY54	1925	1953	FLNA;FLJ00119	Filamin-A	25874000	147;182	1
990	VGSAADIPINISETDLSLLTATVVPPSGREEPCLLK	K	R	36	1	3761.98	Q5HY54;P21333-2;P21333;Q8TES4;Q6NXF2;Q96C61;B4E2F9;B4DTD5;H0Y5F3;H7C2E7;Q60FE6;Q60FE5	Q5HY54	1925	1960	FLNA;FLJ00119	Filamin-A	21400000	147;182	1
995	VHSPSGALEECYVTEIDQDK	K	Y	20	0	2276.03	Q5HY54;P21333-2;P21333;Q8TES4;Q6NXF2;Q96C61;B4E2F9;B4DTD5;Q60FE6;Q60FE5;A6NDY9;A0A087WWY3	Q5HY54	2328	2347	FLNA;FLJ00119	Filamin-A	7006200	147;182	2
996	VHSPSGALEECYVTEIDQDKYAVR	K	F	24	1	2765.3	Q5HY54;P21333-2;P21333;Q8TES4;Q6NXF2;Q96C61;B4E2F9;B4DTD5;Q60FE6;Q60FE5;A6NDY9;A0A087WWY3	Q5HY54	2328	2351	FLNA;FLJ00119	Filamin-A	34518000	147;182	1
1004	VKAFGPGLQGGSAGSPAR	K	F	18	1	1655.87	Q5HY54;P21333-2;P21333;Q60FE6;Q60FE5;A6NDY9;A0A087WWY3	Q5HY54	1070	1087	FLNA	Filamin-A	2366900	147;182	1
1019	VNVGAGSHPNK	R	V	11	0	1078.55	Q5HY54;P21333-2;P21333;Q60FE6;Q60FE5;A6NDY9;A0A087WWY3	Q5HY54	761	771	FLNA	Filamin-A	18571000	147;182	1
1032	VSGQGLHEGHTFEPAEFIIDTR	R	D	22	0	2439.18	Q5HY54;P21333-2;P21333;Q8TES4;Q6NXF2;Q96C61;B4E2F9;B4DTD5;H0Y5C6;Q60FE6;Q60FE5	Q5HY54	2012	2033	FLNA;FLJ00119	Filamin-A	16382000	147;182	2
1036	VTAQGPGLEPSGNIANK	K	T	17	0	1651.85	Q5HY54;P21333-2;P21333;F8WE98;Q60FE6;Q60FE5;A6NDY9;A0A087WWY3	Q5HY54	384	400	FLNA	Filamin-A	34118000	147;182	2
1040	VTVLFAGQHIAK	K	S	12	0	1282.74	Q5HY54;P21333-2;P21333;F8WE98;Q60FE6;Q60FE5;A6NDY9;A0A087WWY3	Q5HY54	356	367	FLNA	Filamin-A	19710000	147;182	1
1048	WGDEHIPGSPYR	K	V	12	0	1412.65	Q5HY54;P21333-2;P21333;Q8TES4;Q6NXF2;Q96C61;B4E2F9;Q86TQ3;Q60FE6;Q60FE5;A6NDY9;A0A087WWY3	Q5HY54	2592	2603	FLNA;FLJ00119	Filamin-A	16472000	147;182	1
1056	YAPSEAGLHEMDIR	R	Y	14	0	1587.74	Q5HY54;P21333-2;P21333;Q8TES4;Q6NXF2;Q96C61;B4E2F9;B4DTD5;H0Y5F3;Q60FE6;Q60FE5;A6NDY9;A0A087WWY3	Q5HY54	1792	1805	FLNA;FLJ00119	Filamin-A	30113000	147;182	2
1068	YGGPYHIGGSPFK	K	A	13	0	1378.67	Q5HY54;P21333-2;P21333;Q8TES4;Q6NXF2;Q96C61;B4E2F9;Q86TQ3;Q60FE6;Q60FE5;A6NDY9;A0A087WWY3	Q5HY54	2461	2473	FLNA;FLJ00119	Filamin-A	29931000	147;182	2
1078	YKGQHVPGSPFQFTVGPLGEGGAHK	K	V	25	1	2594.3	Q5HY54;P21333-2;P21333;Q8TES4;Q6NXF2;Q96C61;B4E2F9;B4DTD5;H0Y5C6;Q2VP91;Q60FE6;Q60FE5	Q5HY54	2176	2200	FLNA;FLJ00119	Filamin-A	4694600	147;182	1
1097	YTPVQQGPVGVNVTYGGDPIPK	K	S	22	0	2285.17	Q5HY54;P21333-2;P21333;Q60FE6;Q60FE5;A6NDY9;A0A087WWY3	Q5HY54	937	958	FLNA	Filamin-A	64584000	147;182	3
1100	YWPQEAGEYAVHVLCNSEDIR	R	L	21	0	2535.15	Q5HY54;P21333-2;P21333;Q60FE6;Q60FE5;A6NDY9;A0A087WWY3	Q5HY54	635	655	FLNA	Filamin-A	39218000	147;182	1
53	AILVDLEPGTMDSVR	R	S	15	0	1614.83	Q9BV28;A0A0B4J269;Q13509;B2RBD5;Q53G92;G3V5W4;G3V2R8;G3V3R4;G3V2N6;Q5JP53;Q5SU16;P07437;B7ZAF0;Q6LC01;B4DY90;B4DMJ5;Q9BVA1;B2R6L0;Q13885;A5D907;A5D906	Q5JP53	45	59	TUBB3;TUBB;TUBB2B;TUBB2A	Tubulin beta-3 chain;Tubulin beta chain;Tubulin beta-2B chain;Tubulin beta-2A chain	394250000	140;192;46	3
64	ALTVPELTQQVFDAK	R	N	15	0	1658.89	Q5JP53;Q5SU16;P07437;B7ZAF0;B4DY90;Q5ST81;B7ZAK1;B4DMU8;Q9BUU9;B4E052;B4DQN9;Q1KSF8;Q96B85;B4DXZ5	Q5JP53	265	279	TUBB;XTP3TPATP1	Tubulin beta chain	180890000	140	4
307	FWEVISDEHGIDPTGTYHGDSDLQLDR	M	I	27	0	3101.4	Q5JP53;Q5SU16;P07437;Q6LC01;B4DY90;B4DMU8;B4DMJ5	Q5JP53	2	28	TUBB	Tubulin beta chain	408290000	140	6
451	ISVYYNEATGGK	R	Y	12	0	1300.63	Q5JP53;Q5SU16;P07437;B7ZAF0;Q6LC01;B4DY90;B4DMU8;B4DMJ5	Q5JP53	29	40	TUBB	Tubulin beta chain	170920000	140	2
452	ISVYYNEATGGKYVPR	R	A	16	1	1815.92	Q5JP53;Q5SU16;P07437;B7ZAF0;Q6LC01;B4DY90;B4DMU8;B4DMJ5	Q5JP53	29	44	TUBB	Tubulin beta chain	14394000	140	3
1049	WIDNPTVDDR	R	G	10	0	1229.57	Q5JQ13;B4E3Q9;B3KXA2;A0A024QZN4;V9HWK2;P18206-2;P18206	Q5JQ13	175	184	VCL;HEL114	Vinculin	0	1	1
173	DLAGSII	K	-	7	0	687.38	Q5T6W2	Q5T6W2	373	379	HNRNPK		762700	181	0
420	IILDLISESPIK	K	G	12	0	1339.8	Q5T6W2;B4DUQ1;B4DFF1;A0A024R228;Q6IBN1;Q5EC54;P61978-3;P61978;P61978-2	Q5T6W2	184	195	HNRNPK;HNRPK	Heterogeneous nuclear ribonucleoprotein K	1087500	181	1
402	IDQLEGDHQLIQEALIFDNK	K	H	20	0	2338.18	Q5ZEZ4;H0YJ11;H0YJW3;H7C5W8;A1L0V1;B3KUX9;B4DFY0;B7Z2W3;H9KV75;B7Z565;A0A024R694;P12814-2;P12814;P12814-3;P12814-4	Q5ZEZ4	8	27	ACTN1	Alpha-actinin-1	2230600	17	1
711	PATEKDLAEDAPWKK	M	I	15	2	1697.86	Q60FE6;Q60FE5;A6NDY9;A0A087WWY3	Q60FE6	2	16	FLNA		3221600	182	1
834	SLNGAVPLGSNAR	K	E	13	0	1254.67	Q6DHZ8;B2RBM8;Q9H2P0	Q6DHZ8	204	216	ADNP	Activity-dependent neuroprotector homeobox protein	15230000	71	1
663	NADMSEEMQQDSVECATQALEK	K	Y	22	0	2513.04	Q6FGH9;P63167;F8VXI7;F8VXL2;F8VRV5	Q6FGH9	10	31	DNCL1;DYNLL1	Dynein light chain 1, cytoplasmic	13470000	160	1
1089	YNPTWHCIVGR	K	N	11	0	1401.66	Q96FJ2;Q6FGH9;P63167	Q6FGH9	50	60	DYNLL2;DNCL1;DYNLL1	Dynein light chain 2, cytoplasmic;Dynein light chain 1, cytoplasmic	5660000	188;160	1
50	AIFTGHSAVVEDVAWHLLHESLFGSVADDQK	K	L	31	0	3377.67	Q6FHQ0;Q16576;E9PC52;Q16576-2;A8K6A2;Q5JP01;Q5JP02	Q6FHQ0	220	250	RBBP7	Histone-binding protein RBBP7	5801300	176	1
88	ASKEMFEDTVEER	M	V	13	1	1569.7	Q6FHQ0;Q16576;E9PC52;A8K6A2	Q6FHQ0	2	14	RBBP7	Histone-binding protein RBBP7	7007000	176	1
202	DYALHWLVLGTHTSDEQNHLVVAR	K	V	24	0	2773.39	Q6FHQ0;Q16576;E9PC52;Q16576-2;A8K6A2;C9J7L0	Q6FHQ0	59	82	RBBP7	Histone-binding protein RBBP7	13528000	176	2
410	IGEEQSAEDAEDGPPELLFIHGGHTAK	K	I	27	0	2846.34	Q6FHQ0;Q16576;E9PC52;Q16576-2;A8K6A2;Q5JNZ6	Q6FHQ0	349	375	RBBP7	Histone-binding protein RBBP7	103710000	176	2
935	TPSSDVLVFDYTKHPAKPDPSGECNPDLR	K	L	29	2	3241.53	Q6FHQ0;Q16576;E9PC52;Q16576-2;Q5JP01	Q6FHQ0	143	171	RBBP7	Histone-binding protein RBBP7	115580000	176	6
993	VHIPNDDAQFDASHCDSDKGEFGGFGSVTGK	R	I	31	1	3293.43	Q6FHQ0;Q16576;Q16576-2;A8K6A2;Q5JP01	Q6FHQ0	83	113	RBBP7	Histone-binding protein RBBP7	58111000	176	3
750	QTLEMNLTNLVKR	K	N	13	1	1558.85	Q6GX22;Q9UJV3-2;Q9UJV3	Q6GX22	221	233	MID2	Probable E3 ubiquitin-protein ligase MID2	2182200	183	0
375	HHLGAATPENPEIELLR	K	L	17	0	1895.99	Q6IB68;A0A087WV05;Q99417	Q6IB68	50	66	MYCBP	C-Myc-binding protein	5062800	39	1
520	LAQYEPPQEEK	K	R	11	0	1330.64	Q6IB68;A0A087WV05;Q99417	Q6IB68	90	100	MYCBP	C-Myc-binding protein	0	39	1
1014	VLVALYEEPEKPNSALDFLK	K	H	20	1	2274.21	Q6IB68;A0A087WV05;Q99417	Q6IB68	30	49	MYCBP	C-Myc-binding protein	13065000	39	1
165	DGNASGTTLLEALDCILPPTRPTDKPLR	K	L	28	2	3020.56	Q6IPT9;Q6IPS9;Q6IPN6;Q53HR5;Q53HQ7;Q53HM9;Q53GE9;Q53G85;Q5VTE0;P68104;Q8IUB0;B4DNE0;Q96RE1;Q53G89;A0A087WVQ9;A8K9C4;Q53GA1;P68104-2;Q96C29;Q8TBL1;Q6P082;Q96CD8;Q6P4C9;Q504Z0;Q53HR1;B4DV42;A0A087WV01;Q9H2I7	Q6IPT9	220	247	EEF1A1;EEF1A1P5;EEF1A1L14	Elongation factor 1-alpha;Putative elongation factor 1-alpha-like 3;Elongation factor 1-alpha 1	5865500	163	1
228	EHALLAYTLGVK	R	Q	12	0	1313.73	Q6IPT9;Q6IPS9;Q6IPN6;Q53HR5;Q53HQ7;Q53HM9;Q53GE9;Q53G85;Q5VTE0;P68104;Q8IUB0;Q96RE1;Q53G89;A8K9C4;Q53GA1;Q53HR1;B4DV42;Q9NZS6;A0A087WV01;Q9H2I7;Q05639;Q59GP5;Q16577;A9X7H1	Q6IPT9	135	146	EEF1A1;EEF1A1P5;EEF1A1L14;EEF1A2;PTI-1	Elongation factor 1-alpha;Putative elongation factor 1-alpha-like 3;Elongation factor 1-alpha 1;Elongation factor 1-alpha 2	5035000	163	2
412	IGGIGTVPVGR	K	V	11	0	1024.6	Q6IPT9;Q6IPS9;Q6IPN6;Q53HR5;Q53HQ7;Q53HM9;Q53GE9;Q53G85;Q5VTE0;P68104;Q8IUB0;B4DNE0;Q96RE1;Q53G89;A0A087WVQ9;A8K9C4;Q53GA1;P68104-2;Q96C29;Q8TBL1;Q6P082;Q96CD8;Q6P4C9;Q504Z0;Q53HR1;Q9NZS6;B4E2C5;Q05639;Q14222;Q59GP5;Q16577	Q6IPT9	256	266	EEF1A1;EEF1A1P5;EEF1A1L14;EEF1A2;EEF1A;PTI-1	Elongation factor 1-alpha;Putative elongation factor 1-alpha-like 3;Elongation factor 1-alpha 1;Elongation factor 1-alpha 2	21626000	163	1
809	SGDAAIVDMVPGKPMCVESFSDYPPLGR	K	F	28	1	2994.39	Q6IPT9;Q6IPS9;Q6IPN6;Q53HR5;Q53HQ7;Q53HM9;Q53GE9;Q53G85;Q5VTE0;P68104;Q8IUB0;B4DNE0;Q96RE1;Q53G89;A0A087WVQ9;A8K9C4;Q53GA1;P68104-2;Q96C29;Q8TBL1;Q6P082;Q96CD8;Q6P4C9;Q504Z0;Q53HR1;B4DV42;Q9NZS6;B4E2C5;Q2F837;Q96EB3	Q6IPT9	396	423	EEF1A1;EEF1A1P5;EEF1A1L14	Elongation factor 1-alpha;Putative elongation factor 1-alpha-like 3;Elongation factor 1-alpha 1	23057000	163	1
875	STTTGHLIYK	K	F	10	0	1119.59	Q6IPT9;Q6IPS9;Q6IPN6;Q53HR5;Q53HQ7;Q53HM9;Q53GE9;Q53G85;Q5VTE0;P68104;B4DNE0;A0A087WVQ9;Q53GA1;P68104-2;A0A087WV01;Q9H2I7;Q05639;Q6NS35;A6PW80;Q6NSH7;Q5JR01	Q6IPT9	21	30	EEF1A1;EEF1A1P5;EEF1A2	Elongation factor 1-alpha;Putative elongation factor 1-alpha-like 3;Elongation factor 1-alpha 1;Elongation factor 1-alpha 2	10934000	163	1
982	VETGVLKPGMVVTFAPVNVTTEVK	R	S	24	1	2514.38	Q6IPT9;Q6IPS9;Q6IPN6;Q53HR5;Q53HQ7;Q53HM9;Q53GE9;Q53G85;Q5VTE0;P68104;Q8IUB0;B4DNE0;Q96RE1;Q53G89;A0A087WVQ9;A8K9C4;P68104-2;Q96C29;Q8TBL1;Q6P082;Q96CD8;Q6P4C9;Q504Z0;B4DV42;Q9NZS6;B4E2C5;Q14222	Q6IPT9	267	290	EEF1A1;EEF1A1P5;EEF1A1L14;EEF1A	Elongation factor 1-alpha;Putative elongation factor 1-alpha-like 3;Elongation factor 1-alpha 1	51577000	163	1
447	ISICSSDKR	R	I	9	1	1064.53	Q6IT96;B5BU61;Q13547;B4DRG0;Q5HYD4	Q6IT96	405	413	HDAC1;DKFZp686H12203	Histone deacetylase;Histone deacetylase 1	5546400	88	1
1102	YYAVNYPLRDGIDDESYEAIFKPVMSK	K	V	27	2	3182.53	Q6IT96;B5BU61;Q13547;B4DRG0	Q6IT96	221	247	HDAC1	Histone deacetylase;Histone deacetylase 1	2952400	88	0
607	LYIVGGSDPYGQK	K	G	13	0	1395.7	Q6MZF3;B3KSM1;B3KMY8;B3KM71;Q9Y6Y0	Q6MZF3	166	178	DKFZp686K06216;IVNS1ABP	Influenza virus NS1A-binding protein	3158500	75	1
1088	YNPENNTWTLIAPMNVAR	R	R	18	0	2103.02	Q6MZF3;B3KSM1;B3KMY8;B3KM71;Q9Y6Y0	Q6MZF3	233	250	DKFZp686K06216;IVNS1ABP	Influenza virus NS1A-binding protein	915970	75	1
994	VHQLEDDK	R	M	8	0	982.472	Q6MZL5;H0YJ97;Q15643	Q6MZL5	258	265	DKFZp686C06243;TRIP11	Thyroid receptor-interacting protein 11	0	123	1
487	KKSDSASSPSGGADK	R	P	15	2	1420.68	Q6P3T1;P98198;P98198-3	Q6P3T1	238	252	ATP8B2	Phospholipid-transporting ATPase ID	57502000	167	1
683	NPDDITQEEYGEFYK	R	S	15	0	1846.79	Q6PK50;B4DMA2;B4DGL0;A0A024RD80;P08238	Q6PK50	292	306	HSP90AB1	Heat shock protein HSP 90-beta	0	33	1
923	TLTLVDTGIGMTK	R	A	13	0	1348.73	Q6PK50;B4DMA2;B4DGL0;A0A024RD80;P08238;O14942	Q6PK50	83	95	HSP90AB1	Heat shock protein HSP 90-beta	4606200	33	1
252	ERLAEMLPSVSSILT	R	-	15	1	1644.88	Q7Z2Z4	Q7Z2Z4	344	358	DKFZp686I14200		0	184	1
821	SIIGMIDMFHK	R	Y	11	0	1290.65	Q86SG5;P31151	Q86SG5	9	19	S100A7A;S100A7	Protein S100-A7A;Protein S100-A7	1924700	150	1
545	LGEHNIEVLEGNEQFINAAK	R	I	20	0	2224.11	Q86W17;Q53ZX9;Q53ZX8;Q53ZX7;Q45KI0;H0Y8D1;Q6PK75;A6XMV8;Q5NV56;Q3SY20;Q3SY19;A0A087WW55;Q7Z5F3;E7EQ64;A6XMV9;Q8NHM4;P07478;P07477	Q86W17	6	25	PRSS1;PRSS2;TRY8;PRSS3P2	Putative trypsin-6;Trypsin-2;Trypsin-1;Alpha-trypsin chain 1;Alpha-trypsin chain 2	278530000	41	2
337	GKDEAMAIGGHWSPSLDGPDPEKDPSVLIK	K	T	30	2	3145.54	Q8IX12-2;Q8IX12;F5H2E6;A0A0C4DGG8;F5H3E1;F5H1H2	Q8IX12-2	478	507	CCAR1	Cell division cycle and apoptosis regulator protein 1	1901200	185	2
443	IQTLPNQNQSQTQPLLK	R	T	17	0	1950.05	Q8IX12-2;Q8IX12;F5H2E6;A0A0C4DGG8;F5H3E1;F5H1H2	Q8IX12-2	190	206	CCAR1	Cell division cycle and apoptosis regulator protein 1	4424100	185	1
471	KDLSQLQENLK	K	I	11	1	1314.71	Q8IX12-2;Q8IX12	Q8IX12-2	1073	1083	CCAR1	Cell division cycle and apoptosis regulator protein 1	1114800	185	1
581	LQLLEEKTDEDEKTILNLENSNK	K	S	23	2	2715.38	Q8IX12-2;Q8IX12	Q8IX12-2	1040	1062	CCAR1	Cell division cycle and apoptosis regulator protein 1	16525000	185	2
679	NLSTVMDEIHTVLK	R	K	14	0	1598.83	Q8IX12-2;Q8IX12	Q8IX12-2	1102	1115	CCAR1	Cell division cycle and apoptosis regulator protein 1	3041400	185	1
772	RLDPPSR	R	F	7	1	839.461	Q8IX12-2;Q8IX12;F5H2E6;A0A0C4DGG8;F5H3E1;F5H1H2	Q8IX12-2	279	285	CCAR1	Cell division cycle and apoptosis regulator protein 1	4274500	185	0
791	SCALAEDPQELR	K	D	12	0	1387.64	Q8IX12-2;Q8IX12;F5H2E6;A0A0C4DGG8;F5H3E1;F5H1H2	Q8IX12-2	449	460	CCAR1	Cell division cycle and apoptosis regulator protein 1	0	185	1
1015	VLVEATYNPNMPFK	R	W	14	0	1621.82	Q8IX12-2;Q8IX12;F5H2E6;A0A0C4DGG8;F5H3E1	Q8IX12-2	171	184	CCAR1	Cell division cycle and apoptosis regulator protein 1	6201200	185	1
1075	YILPDEPAIIVHPNWAAK	R	S	18	0	2046.09	Q8IX12-2;Q8IX12;F5H2E6;A0A0C4DGG8;F5H1H2;H0YFJ7	Q8IX12-2	706	723	CCAR1	Cell division cycle and apoptosis regulator protein 1	7808500	185	1
895	TCFVDCLIEQTHPEIR	K	K	16	0	2016.94	Q8IXJ3;B4DZB1;B3KX19;Q6IBM8;A8KAP3;Q15029-2;Q15029	Q8IXJ3	21	36	SNRP116;U5-116KD;EFTUD2	116 kDa U5 small nuclear ribonucleoprotein component	992810	63	1
63	ALTVPELTQQMFDAK	R	N	15	0	1690.86	Q9BV28;A0A0B4J269;Q13509;B2RBD5;Q53G92;Q13509-2;Q3ZCR3;Q8IZ29;Q8IWP6;P68371;Q8N6N5;B3KML9;Q96HX0;B4DFH6;P04350;B4DJ43;B4DE77	Q8IZ29	283	297	TUBB3;TUBB2C;TUBB4B;TUBB4A	Tubulin beta-3 chain;Tubulin beta-4B chain;Tubulin beta-4A chain	68536000	165;137;46	2
111	AVLVDLEPGTMDSVR	R	S	15	0	1600.81	Q8IZ29;Q8IWP6;P68371;Q8N6N5;B3KML9;B4DNW1;A0A075B724;P04350;B4DJ43;B4DE77;M0R278;M0QY85;M0R0X0;M0QY37;M0QX14;M0QZL7;Q3ZCM7	Q8IZ29	63	77	TUBB2C;TUBB4B;TUBB8;TUBB4A	Tubulin beta-4B chain;Tubulin beta-4A chain;Tubulin beta-8 chain	129010000	165;137;177	3
234	EIVHLQAGQCGNQIGAK	R	F	17	0	1821.92	Q8IZ29;Q8IWP6;P68371;Q8N6N5;M0R2D3;B4DFH6;B4DNW1;M0QYM7;M0R042;M0R2T4;P04350;B4DJ43;M0R278;M0QY85;M0R0X0;M0QY37;M0QX14;M0QZL7	Q8IZ29	3	19	TUBB2C;TUBB4B;TUBB4A	Tubulin beta-4B chain;Tubulin beta-4A chain	158090000	165;137	4
265	EVDEQMLNVQNK	K	N	12	0	1445.68	Q8IZ29;Q8IWP6;P68371;Q8N6N5;B3KML9;Q96HX0;B7Z4N1;A4UCT2;Q6P602;Q5JP53;Q5SU16;P07437;B7ZAF0;Q6LC01;B4DY90;Q5ST81;B7ZAK1;B4DMU8;Q9BUU9;B4E052;B4DQN9;B4DMJ5;Q1KSF8;Q96B85;B4DXZ5;Q9BVA1;B2R6L0;Q13885;A0A024QZU2;O43209;Q9UGA2	Q8IZ29	325	336	TUBB2C;TUBB4B;TUBB;XTP3TPATP1;TUBB2B;TUBB2A;DKFZp566F223	Tubulin beta-4B chain;Tubulin beta chain;Tubulin beta-2B chain;Tubulin beta-2A chain	49929000	165;140;192	1
294	FPGQLNADLR	R	K	10	0	1129.59	Q9BV28;A0A0B4J269;Q13509;B2RBD5;Q53G92;Q13509-2;Q3ZCR3;G3V2A3;I3L2F9;A6NNZ2;Q9H4B7;Q9BUF5;K7ESM5;B3KS31;B4DP54;B4E386;Q8IZ29;Q8IWP6;P68371;Q8N6N5;B3KML9;Q96HX0;M0R2D3;B7Z4N1;P04350;B4DJ43;B4DE77;Q5JP53;Q5SU16;P07437;B7ZAF0;Q6LC01;B4DY90;Q5ST81;B7ZAK1;B4DMU8;Q9BUU9;B4E052;B4DQN9;Q1KSF8;Q96B85;B4DXZ5;Q9BVA1;B2R6L0;Q13885;A0A024QZU2;O43209;Q9UGA2;A1L195;A5D907;A5D906;A1L196;Q3ZCM7;A0A075B736;Q5SQY0	Q8IZ29	242	251	TUBB3;TUBB1;TUBB6;TUBB2C;TUBB4B;TUBB4A;TUBB;XTP3TPATP1;TUBB2B;TUBB2A;DKFZp566F223;TUBB8	Tubulin beta-3 chain;Tubulin beta-8 chain-like protein LOC260334;Tubulin beta-1 chain;Tubulin beta-6 chain;Tubulin beta-4B chain;Tubulin beta-4A chain;Tubulin beta chain;Tubulin beta-2B chain;Tubulin beta-2A chain;Tubulin beta-8 chain	4850900	165;140;137;192;46;191;177	1
308	FWEVISDEHGIDPTGTYHGDSDLQLER	K	I	27	0	3115.42	Q8IZ29;Q8IWP6;P68371;Q8N6N5;B3KML9;M0R2D3;B4DNW1;M0QYM7;P04350;B4DJ43;M0R278;M0QY85;M0R0X0;M0QY37;M0QX14;M0QZL7	Q8IZ29	20	46	TUBB2C;TUBB4B;TUBB4A	Tubulin beta-4B chain;Tubulin beta-4A chain	200010000	165;137	3
331	GHYTEGAELVDSVLDVVR	K	K	18	0	1957.97	Q9BV28;A0A0B4J269;Q13509;B2RBD5;Q53G92;Q13509-2;Q3ZCR3;G3V2A3;Q8IZ29;Q8IWP6;P68371;Q8N6N5;Q5JP53;Q5SU16;P07437;B7ZAF0;Q6LC01;Q5ST81;B7ZAK1;B4DMJ5;Q9BVA1;B2R6L0;Q13885;A0A024QZU2;O43209;A1L195;A5D907;A5D906	Q8IZ29	104	121	TUBB3;TUBB2C;TUBB4B;TUBB;TUBB2B;TUBB2A	Tubulin beta-3 chain;Tubulin beta-4B chain;Tubulin beta chain;Tubulin beta-2B chain;Tubulin beta-2A chain	310010000	165;140;192;46	4
332	GHYTEGAELVDSVLDVVRK	K	E	19	1	2086.07	Q9BV28;A0A0B4J269;Q13509;B2RBD5;Q53G92;Q13509-2;Q3ZCR3;G3V2A3;Q8IZ29;Q8IWP6;P68371;Q8N6N5;Q5JP53;Q5SU16;P07437;B7ZAF0;Q6LC01;Q5ST81;B7ZAK1;B4DMJ5;Q9BVA1;B2R6L0;Q13885;A0A024QZU2;O43209;A1L195;A5D907;A5D906	Q8IZ29	104	122	TUBB3;TUBB2C;TUBB4B;TUBB;TUBB2B;TUBB2A	Tubulin beta-3 chain;Tubulin beta-4B chain;Tubulin beta chain;Tubulin beta-2B chain;Tubulin beta-2A chain	379730000	165;140;192;46	4
432	IMNTFSVVPSPK	R	V	12	0	1318.7	Q9BV28;A0A0B4J269;Q13509;B2RBD5;Q53G92;Q13509-2;Q3ZCR3;G3V2A3;Q8IZ29;Q8IWP6;P68371;Q8N6N5;B3KML9;M0R2D3;M0QYM7;M0R042;P04350;B4DE77;Q5JP53;Q5SU16;P07437;B7ZAF0;Q6LC01;B4DY90;Q5ST81;B7ZAK1;Q9BUU9;B4E052;B4DQN9;Q1KSF8	Q8IZ29	163	174	TUBB3;TUBB2C;TUBB4B;TUBB4A;TUBB;XTP3TPATP1	Tubulin beta-3 chain;Tubulin beta-4B chain;Tubulin beta-4A chain;Tubulin beta chain	165580000	165;140;137;46	3
434	INVYYNEATGGK	R	Y	12	0	1327.64	Q8IZ29;Q8IWP6;P68371;Q8N6N5;B3KML9;B4DNW1	Q8IZ29	47	58	TUBB2C;TUBB4B	Tubulin beta-4B chain	85691000	165	2
435	INVYYNEATGGKYVPR	R	A	16	1	1842.93	Q8IZ29;Q8IWP6;P68371;Q8N6N5;B3KML9;B4DNW1	Q8IZ29	47	62	TUBB2C;TUBB4B	Tubulin beta-4B chain	0	165	1
446	ISEQFTAMFR	R	R	10	0	1228.59	Q9BV28;A0A0B4J269;Q13509;B2RBD5;Q53G92;Q13509-2;A4UCU2;Q8IZ29;Q8IWP6;P68371;Q8N6N5;B3KML9;Q96HX0;B4DFH6;B7Z4N1;Q6P602;P04350;B4DJ43;B4DE77;Q5JP53;Q5SU16;P07437;B7ZAF0;Q6LC01;B4DY90;Q5ST81;B7ZAK1;B4DMU8;Q9BUU9;B4E052;B4DQN9;B4DMJ5;Q96B85;B4DXZ5;Q9BVA1;B2R6L0;Q13885;A0A024QZU2;O43209	Q8IZ29	381	390	TUBB3;TUBB2C;TUBB4B;TUBB;TUBB4A;TUBB2B;TUBB2A	Tubulin beta-3 chain;Tubulin beta-4B chain;Tubulin beta-4A chain;Tubulin beta chain;Tubulin beta-2B chain;Tubulin beta-2A chain	15789000	165;140;137;192;46	1
489	KLAVNMVPFPR	R	L	11	1	1270.72	Q9BV28;A0A0B4J269;Q13509;B2RBD5;Q53G92;Q13509-2;Q3ZCR3;I3L2F9;A6NNZ2;Q9H4B7;Q9BUF5;K7ESM5;B3KS31;B4DP54;B4E386;Q8IZ29;Q8IWP6;P68371;Q8N6N5;B3KML9;Q96HX0;B4DFH6;B7Z4N1;P04350;B4DJ43;B4DE77;Q5JP53;Q5SU16;P07437;B7ZAF0;Q6LC01;B4DY90;Q5ST81;B4DMU8;Q9BUU9;B4E052;B4DQN9;Q1KSF8;Q96B85;B4DXZ5;Q9BVA1;B2R6L0;Q13885;A0A024QZU2;O43209;Q9UGA2;Q3ZCM7;A0A075B736;Q5SQY0	Q8IZ29	252	262	TUBB3;TUBB1;TUBB6;TUBB2C;TUBB4B;TUBB4A;TUBB;XTP3TPATP1;TUBB2B;TUBB2A;DKFZp566F223;TUBB8	Tubulin beta-3 chain;Tubulin beta-8 chain-like protein LOC260334;Tubulin beta-1 chain;Tubulin beta-6 chain;Tubulin beta-4B chain;Tubulin beta-4A chain;Tubulin beta chain;Tubulin beta-2B chain;Tubulin beta-2A chain;Tubulin beta-8 chain	10858000	165;140;137;192;46;191;177	3
595	LTTPTYGDLNHLVSATMSGVTTCLR	K	F	25	0	2707.33	Q8IZ29;Q8IWP6;P68371;M0R2D3;B7Z4N1;P04350;B4DE77;Q5JP53;Q5SU16;P07437;B7ZAF0;B4DY90;Q5ST81;B7ZAK1;B4DMU8;Q9BUU9;B4E052;B4DQN9;Q1KSF8;Q96B85;B4DXZ5;Q9BVA1;B2R6L0;Q13885;A0A024QZU2;O43209;Q9UGA2;A1L195;A5D907;A5D906;A1L196	Q8IZ29	217	241	TUBB2C;TUBB4B;TUBB4A;TUBB;XTP3TPATP1;TUBB2B;TUBB2A;DKFZp566F223	Tubulin beta-4B chain;Tubulin beta-4A chain;Tubulin beta chain;Tubulin beta-2B chain;Tubulin beta-2A chain	1755300	165;140;137;192	1
646	MREIVHLQAGQCGNQIGAK	-	F	19	1	2109.06	Q8IZ29;Q8IWP6;P68371;Q8N6N5;M0R2D3;B4DFH6;B4DNW1;M0QYM7;M0R042;M0R2T4;P04350;B4DJ43;M0QY85;M0R0X0;M0QY37;M0QX14	Q8IZ29	1	19	TUBB2C;TUBB4B;TUBB4A	Tubulin beta-4B chain;Tubulin beta-4A chain	94416000	165;137	7
649	MSMKEVDEQMLNVQNK	R	N	16	1	1922.89	Q8IZ29;Q8IWP6;P68371;Q8N6N5;B3KML9;Q96HX0;B7Z4N1;A4UCT2;Q6P602;Q5JP53;Q5SU16;P07437;B7ZAF0;Q6LC01;B4DY90;Q5ST81;B7ZAK1;B4DMU8;Q9BUU9;B4E052;B4DQN9;Q1KSF8;Q96B85;B4DXZ5;Q9BVA1;B2R6L0;Q13885;A0A024QZU2;O43209;Q9UGA2	Q8IZ29	321	336	TUBB2C;TUBB4B;TUBB;XTP3TPATP1;TUBB2B;TUBB2A;DKFZp566F223	Tubulin beta-4B chain;Tubulin beta chain;Tubulin beta-2B chain;Tubulin beta-2A chain	16755000	165;140;192	1
700	NSSYFVEWIPNNVK	K	T	14	0	1695.83	Q9BV28;A0A0B4J269;Q13509;B2RBD5;Q13509-2;Q9BUF5;K7ESM5;B3KS31;B4DP54;B4E386;Q8IZ29;Q8IWP6;P68371;Q8N6N5;B3KML9;Q96HX0;B4DFH6;B7Z4N1;A4UCT2;Q6P602;P04350;B4DJ43;B4DE77;Q5JP53;Q5SU16;P07437;B7ZAF0;Q6LC01;B4DY90;Q5ST81;B7ZAK1;Q9BUU9;B4E052;B4DQN9;B4DMJ5;Q96B85;B4DXZ5;Q9BVA1;B2R6L0;Q13885;A0A024QZU2;O43209;Q9UGA2	Q8IZ29	337	350	TUBB3;TUBB6;TUBB2C;TUBB4B;TUBB;TUBB4A;TUBB2B;TUBB2A;DKFZp566F223	Tubulin beta-3 chain;Tubulin beta-6 chain;Tubulin beta-4B chain;Tubulin beta-4A chain;Tubulin beta chain;Tubulin beta-2B chain;Tubulin beta-2A chain	82056000	165;140;137;192;46;191	1
814	SGPFGQIFRPDNFVFGQSGAGNNWAK	R	G	26	1	2797.34	Q8IZ29;Q8IWP6;P68371;Q8N6N5;P04350;B4DJ43;B4DE77;M0R278;M0QY85;M0QZL7;M0R1I1;Q5JP53;Q5SU16;P07437;B7ZAF0;Q6LC01;B4DY90;Q5ST81;B7ZAK1;B4DQN9;B4DMJ5;Q9BVA1;B2R6L0;Q13885;A0A024QZU2;A1L195;A5D907;A5D906	Q8IZ29	78	103	TUBB2C;TUBB4B;TUBB4A;TUBB;TUBB2B;TUBB2A	Tubulin beta-4B chain;Tubulin beta-4A chain;Tubulin beta chain;Tubulin beta-2B chain;Tubulin beta-2A chain	68507000	165;140;137;192	1
1031	VSDTVVEPYNATLSVHQLVENTDETYCIDNEALYDICFR	K	T	39	0	4592.1	Q9BUF5;K7ESM5;B3KS31;B4DP54;B4E386;Q8IZ29;Q8IWP6;P68371;Q8N6N5;B3KML9;M0R2D3;M0QYM7;M0R042;P04350;B4DE77;Q5JP53;Q5SU16;P07437;B7ZAF0;Q6LC01;B4DY90;Q5ST81;B7ZAK1;Q9BUU9;B4E052;B4DQN9;Q1KSF8;Q9BVA1;A0A024QZU2;O43209;Q9UGA2;A1L195;A1L196	Q8IZ29	175	213	TUBB6;TUBB2C;TUBB4B;TUBB4A;TUBB;XTP3TPATP1;TUBB2B;DKFZp566F223	Tubulin beta-6 chain;Tubulin beta-4B chain;Tubulin beta-4A chain;Tubulin beta chain;Tubulin beta-2B chain	9679800	165;140;137;192;191	3
1082	YLTVAAVFR	R	G	9	0	1038.59	Q8IZ29;Q8IWP6;P68371;Q8N6N5;B3KML9;Q96HX0;B4DFH6;A4UCT2;P04350;B4DJ43;B4DE77;Q5JP53;Q5SU16;P07437;B7ZAF0;Q6LC01;B4DY90;Q5ST81;B7ZAK1;B4DMU8;Q9BUU9;B4E052;Q1KSF8;Q96B85;B4DXZ5	Q8IZ29	310	318	TUBB2C;TUBB4B;TUBB4A;TUBB;XTP3TPATP1	Tubulin beta-4B chain;Tubulin beta-4A chain;Tubulin beta chain	98492000	165;140;137	1
792	SCCSCCPVGCAK	K	C	12	0	1444.5	Q8WVB5;Q8TDC4;A0A024R6T4;Q8N339;P80297;P13640-2;P04732;P02795;P13640	Q8WVB5	32	43	MT1X;MT1M;MT1G;MT1E;MT2A	Metallothionein;Metallothionein-1M;Metallothionein-1X;Metallothionein-1G;Metallothionein-1E;Metallothionein-2	11176000	20	1
107	AVHADFFNDFEDLFDDDDIQ	K	-	20	0	2386.99	Q8WXC6	Q8WXC6	38	57	MYEOV2	Myeloma-overexpressed gene 2 protein	266890000	186	2
635	MKPAVDEMFPEGAGPYVDLDEAGGSTGLLMDLAANEK	-	A	37	1	3837.78	Q8WXC6	Q8WXC6	1	37	MYEOV2	Myeloma-overexpressed gene 2 protein	16952000	186	0
162	DGIDDESYGQIFKPIISK	R	V	18	1	2024.01	Q92769-3;Q92769;B3KUJ5	Q92769-3	201	218	HDAC2	Histone deacetylase 2;Histone deacetylase	5697700	187	1
548	LHISPSNMTNQNTPEYMEK	K	I	19	0	2233.01	Q92769-3;Q92769;B3KUJ5;Q59GB9	Q92769-3	314	332	HDAC2	Histone deacetylase 2;Histone deacetylase	15236000	187	2
651	MTHNLLLNYGLYR	R	K	13	0	1606.83	Q6IT96;B5BU61;Q13547;E5RFI6;E5RJ04;E5RGV4;E5RHE7;E5RH52;E5RG37;E5RFP9;H3BM24;Q5TEE2;B4DSK9;E5RK19;Q92769-3;Q92769	Q92769-3	8	20	HDAC1;HDAC2	Histone deacetylase;Histone deacetylase 1;Histone deacetylase 2	11501000	187;88	1
825	SIRPDNMSEYSK	R	Q	12	1	1425.66	Q6IT96;B5BU61;Q13547;E5RFI6;E5RJ04;E5RGV4;E5RHE7;E5RH52;E5RG37;E5RFP9;H3BM24;Q5TEE2;B4DSK9;B7Z3S4;Q92769-3;Q92769;B3KUJ5	Q92769-3	49	60	HDAC1;HDAC2	Histone deacetylase;Histone deacetylase 1;Histone deacetylase 2	9119300	187;88	1
1016	VMEMYQPSAVVLQCGADSLSGDR	K	L	23	0	2512.14	Q92769-3;Q92769;B3KUJ5	Q92769-3	219	241	HDAC2	Histone deacetylase 2;Histone deacetylase	2193400	187	1
1101	YYAVNFPMRDGIDDESYGQIFKPIISK	K	V	27	2	3165.55	Q92769-3;Q92769;B3KUJ5	Q92769-3	192	218	HDAC2	Histone deacetylase 2;Histone deacetylase	1968400	187	1
1086	YNIEKDIAAYIK	K	K	12	1	1439.77	Q96FJ2	Q96FJ2	32	43	DYNLL2	Dynein light chain 2, cytoplasmic	1962300	188	1
54	ALCMVCGAEIR	R	A	11	0	1278.59	Q9BUA3	Q9BUA3	89	99	C11orf84	Uncharacterized protein C11orf84	2813000	190	1
120	CEEGEDEEEAMVVAVIPRPEPMLR	K	V	24	1	2784.28	Q9BUA3	Q9BUA3	19	42	C11orf84	Uncharacterized protein C11orf84	1165200	190	1
643	MPAEIVVLLDSEDNPSLPKR	R	S	20	1	2222.16	Q9BUA3	Q9BUA3	171	190	C11orf84	Uncharacterized protein C11orf84	4151800	190	1
840	SNILEAWSEGVALLQDVR	K	A	18	0	1999.04	Q9BUA3	Q9BUA3	126	143	C11orf84	Uncharacterized protein C11orf84	8741300	190	1
8	AALVDLEPGTMDSVR	R	S	15	0	1572.78	Q9BUF5;B4DP54;K7EL29;K7ESQ3;K7EQT3;K7EJ64;K7ERA8;K7EJZ4;K7EN98;K7EPE5	Q9BUF5	63	77	TUBB6	Tubulin beta-6 chain	9843700	191	1
437	INVYYNESSSQK	R	Y	12	0	1430.67	Q9BUF5;B4DP54;K7EL29;K7ESQ3;K7EQT3;K7EJ64;K7ERA8;K7EJZ4;K7EN98;K7EPE5	Q9BUF5	47	58	TUBB6	Tubulin beta-6 chain	5783500	191	1
264	EVDEQMLAIQSK	K	N	12	0	1389.68	Q9BV28;A0A0B4J269;Q13509;B2RBD5;Q53G92;Q13509-2;Q3ZCR3;Q9BUF5;K7ESM5;B3KS31;B4DP54;B4E386	Q9BV28	281	292	TUBB3;TUBB6	Tubulin beta-3 chain;Tubulin beta-6 chain	0	46;191	1
450	ISVYYNEASSHK	R	Y	12	0	1396.66	Q9BV28;A0A0B4J269;Q13509;Q53G92;G3V5W4;G3V2R8;G3V3R4;G3V2N6	Q9BV28	3	14	TUBB3	Tubulin beta-3 chain	4723200	46	1
306	FWEVISDEHGIDPTGSYHGDSDLQLER	K	I	27	0	3101.4	Q9BVA1;B2R6L0;Q13885	Q9BVA1	20	46	TUBB2B;TUBB2A	Tubulin beta-2B chain;Tubulin beta-2A chain	5846300	192	1
474	KESESCDCLQGFQLTHSLGGGTGSGMGTLLISK	R	I	33	1	3454.62	Q9BVA1;B2R6L0;Q13885;A0A024QZU2;O43209;Q9UGA2;A1L195;A5D907;A5D906;A1L196	Q9BVA1	122	154	TUBB2B;TUBB2A;DKFZp566F223	Tubulin beta-2B chain;Tubulin beta-2A chain	2036700	192	1
461	IVSVGDDQEIHIYDCPI	K	-	17	0	1971.92	Q9GZS3;H0YL19	Q9GZS3	289	305	WDR61	WD repeat-containing protein 61;WD repeat-containing protein 61, N-terminally processed	3345500	193	1
819	SIDAGPVDAWTLAFSPDSQYLATGTHVGK	K	V	29	0	3003.46	Q9GZS3;H0YMF9;H0YN81	Q9GZS3	101	129	WDR61	WD repeat-containing protein 61;WD repeat-containing protein 61, N-terminally processed	2782800	193	1
701	NSVVEASEAAYKEAFEISK	K	E	19	1	2071.01	Q9H4N8;A0A024R1K7;Q04917;A2IDB2	Q9H4N8	74	92	YWHAH	14-3-3 protein eta	1104000	5	1
197	DTTVIIWQVDPDTHLLK	K	L	17	0	1993.05	Q9H7D7-2;Q9H7D7;H0Y9R3;B4DRF0	Q9H7D7-2	360	376	WDR26	WD repeat-containing protein 26	1271000	194	1
528	LDNNLDSVSLLIDHVCSR	K	R	18	0	2069.02	Q9H7D7-2;Q9H7D7	Q9H7D7-2	307	324	WDR26	WD repeat-containing protein 26	2755500	194	1
801	SELPIAELTGHTR	R	T	13	0	1422.75	Q9H7D7-2;Q9H7D7;H0Y9R3;B4DRF0	Q9H7D7-2	586	598	WDR26	WD repeat-containing protein 26	2354000	194	2
1024	VQCLWCLSDGK	R	T	11	0	1364.62	Q9H7D7-2;Q9H7D7;H0Y9R3;B4DRF0	Q9H7D7-2	472	482	WDR26	WD repeat-containing protein 26	2096900	194	1
892	TAQGSTPRMAPTH	R	-	13	1	1353.65	Q9H9B1-2	Q9H9B1-2	54	66			0	195	1
268	EWGEELQAVLR	R	S	11	0	1328.67	Q9HC39;Q9HBB9;I3L2C7;Q8WUM5;P57678	Q9HC39	315	325	GEMIN4	Gem-associated protein 4	628670	126	1
625	MDLQAAGAQAQGAAEPSR	-	G	18	0	1770.83	Q9NQ92;J3QRX9;J3QRX4	Q9NQ92	1	18	COPRS	Coordinator of PRMT5 and differentiation stimulator	0	196	1
626	MDLQAAGAQAQGAAEPSRGPPLPSAR	-	G	26	1	2546.27	Q9NQ92;J3QRX9;J3QRX4	Q9NQ92	1	26	COPRS	Coordinator of PRMT5 and differentiation stimulator	31043000	196	1
655	MVFETGQFDDAED	K	-	13	0	1502.59	Q9NQ92;H9KV77	Q9NQ92	172	184	COPRS	Coordinator of PRMT5 and differentiation stimulator	21361000	196	1
558	LIMNYLVTEGFKEAAEK	R	F	17	1	1955.01	Q9NWU2;B4DS00	Q9NWU2	32	48	GID8	Glucose-induced degradation protein 8 homolog	1356100	197	1
567	LLLWAQNELDQK	K	K	12	0	1469.79	Q9NWU2	Q9NWU2	198	209	GID8	Glucose-induced degradation protein 8 homolog	1620200	197	1
914	TLALLAFDSPEESPFGDLLHTMQR	R	Q	24	0	2687.33	Q9NWU2	Q9NWU2	146	169	GID8	Glucose-induced degradation protein 8 homolog	14497000	197	1
617	MAPVPLDDSNRPASLTK	K	D	17	1	1810.92	Q9NYF8-4;Q9NYF8-2;Q9NYF8;E9PJA7;Q6DCA8;E9PK09;E9PQN2;E9PKI6;E9PK91;Q9NYF8-3	Q9NYF8-4	378	394	BCLAF1	Bcl-2-associated transcription factor 1	6796600	198	1
1067	YFLHDDRDDGVDYWAK	K	R	16	1	2013.89	Q9NYF8-4;Q9NYF8-2;Q9NYF8;B0AZU3;H0YF14	Q9NYF8-4	673	688	BCLAF1	Bcl-2-associated transcription factor 1	1936800	198	1
1027	VQTEIALLLQR	K	K	11	0	1282.76	Q9UG54;Q5U0D0;Q5U0C9;O43318-2;O43318	Q9UG54	190	200	DKFZp586F0420;MAP3K7	Mitogen-activated protein kinase kinase kinase 7	679380	133	1
71	AMDQEITVNPQFVQK	K	S	15	0	1746.86	Q9UNS2;H7C3P9;Q9UNS2-2;B4DN01	Q9UNS2	392	406	COPS3	COP9 signalosome complex subunit 3	19164000	199	1
86	ASALEQFVNSVR	M	Q	12	0	1319.68	Q9UNS2;C9JLV5;J3QKR0;J3KTQ1;J3QL22;J3QS85	Q9UNS2	2	13	COPS3	COP9 signalosome complex subunit 3	21913000	199	1
121	CFKPALPYLDVDMMDICK	K	E	18	1	2215.02	Q9UNS2;H7C3P9;Q9UNS2-2;B4DN01;C9JLV5	Q9UNS2	154	171	COPS3	COP9 signalosome complex subunit 3	5709000	199	1
163	DGMVSFHDNPEK	K	Y	12	0	1374.59	Q9UNS2;H7C3P9;Q9UNS2-2;B4DN01;K7ELN6	Q9UNS2	355	366	COPS3	COP9 signalosome complex subunit 3	30154000	199	2
164	DGMVSFHDNPEKYNNPAMLHNIDQEMLK	K	C	28	1	3286.48	Q9UNS2;H7C3P9;Q9UNS2-2;B4DN01	Q9UNS2	355	382	COPS3	COP9 signalosome complex subunit 3	25579000	199	1
645	MQMNTNQLTSIHADLCQLCLLAK	K	C	23	0	2702.3	Q9UNS2;H7C3P9;Q9UNS2-2;B4DN01;C9JLV5	Q9UNS2	131	153	COPS3	COP9 signalosome complex subunit 3	12604000	199	1
737	QLSAQGQMTQLCELINK	R	S	17	0	1960.97	Q9UNS2;C9JLV5;J3QKR0;J3KTQ1	Q9UNS2	14	30	COPS3	COP9 signalosome complex subunit 3	5235700	199	1
900	TFLTLSLQDMASR	K	V	13	0	1481.75	Q9UNS2;H7C3P9;Q9UNS2-2;B4DN01	Q9UNS2	313	325	COPS3	COP9 signalosome complex subunit 3	38979000	199	1
1025	VQLSGPQEAEKYVLHMIEDGEIFASINQK	R	D	29	1	3272.64	Q9UNS2;H7C3P9;Q9UNS2-2;B4DN01	Q9UNS2	326	354	COPS3	COP9 signalosome complex subunit 3	83345000	199	2
1057	YATDTFAGLCHQLTNALVER	R	K	20	0	2279.1	Q9UNS2;H7C3P9;Q9UNS2-2;C9JLV5;J3QKR0;K7ES36	Q9UNS2	95	114	COPS3	COP9 signalosome complex subunit 3	14953000	199	1
1087	YNNPAMLHNIDQEMLK	K	C	16	0	1929.91	Q9UNS2;H7C3P9;Q9UNS2-2;B4DN01	Q9UNS2	367	382	COPS3	COP9 signalosome complex subunit 3	61485000	199	2
627	MDSFDEDLARPSGLLAQER	R	K	19	1	2149.01	Q9Y2W1	Q9Y2W1	573	591	THRAP3	Thyroid hormone receptor-associated protein 3	12165000	200	1
820	SIFQHIQSAQSQR	R	S	13	0	1528.77	Q9Y2W1	Q9Y2W1	609	621	THRAP3	Thyroid hormone receptor-associated protein 3	4981800	200	1
851	SPSELFAQHIVTIVHHVK	R	E	18	0	2041.11	Q9Y2W1	Q9Y2W1	622	639	THRAP3	Thyroid hormone receptor-associated protein 3	1326900	200	1
1077	YKDDPVDLRLDIER	K	R	14	2	1745.89	Q9Y2W1	Q9Y2W1	710	723	THRAP3	Thyroid hormone receptor-associated protein 3	1519300	200	1
1098	YVQLPADEVDTQLLQDAAR	R	K	19	0	2144.07	Q9Y333	Q9Y333	69	87	LSM2	U6 snRNA-associated Sm-like protein LSm2	1412600	201	1
66	ALWCSEDKQILSADDK	K	T	16	1	1877.88	Q9Y3F4;Q9Y3F4-2;B0AZV0	Q9Y3F4	149	164	STRAP	Serine-threonine kinase receptor-associated protein	5285500	202	2
67	ALWCSEDKQILSADDKTVR	K	L	19	2	2234.1	Q9Y3F4;Q9Y3F4-2;B0AZV0	Q9Y3F4	149	167	STRAP	Serine-threonine kinase receptor-associated protein	2890100	202	1
299	FSPDGELYASGSEDGTLR	R	L	18	0	1899.85	Q9Y3F4;Q9Y3F4-2;B0AZV0;H0YH33	Q9Y3F4	273	290	STRAP	Serine-threonine kinase receptor-associated protein	5597300	202	1
604	LWQTVVGK	R	T	8	0	929.533	Q9Y3F4;Q9Y3F4-2;B0AZV0;H0YH33	Q9Y3F4	291	298	STRAP	Serine-threonine kinase receptor-associated protein	6861900	202	1
806	SFEAPATINSASLHPEKEFLVAGGEDFK	K	L	28	1	2990.47	Q9Y3F4;Q9Y3F4-2;B0AZV0	Q9Y3F4	219	246	STRAP	Serine-threonine kinase receptor-associated protein	2075000	202	1
955	TVDFTQDSNYLLTGGQDK	K	L	18	0	2000.93	Q9Y3F4;Q9Y3F4-2;B0AZV0	Q9Y3F4	105	122	STRAP	Serine-threonine kinase receptor-associated protein	7847400	202	1
1043	VWDAVSGDELMTLAHK	K	H	16	0	1770.86	Q9Y3F4;Q9Y3F4-2	Q9Y3F4	85	100	STRAP	Serine-threonine kinase receptor-associated protein	9278700	202	1
1061	YDYNSGEELESYKGHFGPIHCVR	K	F	23	1	2756.23	Q9Y3F4;Q9Y3F4-2;B0AZV0;H0YH33	Q9Y3F4	250	272	STRAP	Serine-threonine kinase receptor-associated protein	2391200	202	1
115	AYGFSCDGEGVLK	K	F	13	0	1401.62	U3KQ85;Q99622	U3KQ85	33	45	C12orf57	Protein C10	2138100	189	1
884	SYEAQDPEIASLSGK	K	L	15	0	1593.75	U3KQ85;Q99622;F5GXW5	U3KQ85	52	66	C12orf57	Protein C10	1813800	189	1
84	ARFEELNADLFR	R	G	12	1	1479.75	V9HW22;P11142;E9PKE3;Q53GZ6;Q53HF2;P11142-2;Q96IS6;E9PNE6;B3KTV0;E9PN89;B4E1Q1;A8K7Q2;A0A024R6B5;P54652	V9HW22	300	311	HEL-S-72p;HSPA8;HSPA2	Heat shock cognate 71 kDa protein;Heat shock-related 70 kDa protein 2	12283000	145	1
126	CNEIINWLDK	K	N	10	0	1303.62	V9HW22;P11142;E9PKE3;Q53GZ6;Q96IS6;E9PNE6;B3KTV0;B4E1Q1;A8K7Q2;Q96BE0;Q9NZ87;Q9NWW3;Q96H53;E9PS65;E9PM13	V9HW22	574	583	HEL-S-72p;HSPA8	Heat shock cognate 71 kDa protein	2738600	145	1
274	FDDAVVQSDMK	R	H	11	0	1253.56	V9HW22;P11142;E9PKE3;Q53GZ6;Q53HF2;P11142-2;Q96IS6;E9PNE6;B4DTX2;E9PN89;E9PQQ4;E9PQK7;E9PK54;E9PLF4;E9PPY6;E9PN25;A4D111	V9HW22	78	88	HEL-S-72p;HSPA8;LOC401308	Heat shock cognate 71 kDa protein	3814100	145	1
277	FEELNADLFR	R	G	10	0	1252.61	V9HW22;P11142;E9PKE3;Q53GZ6;Q53HF2;P11142-2;Q96IS6;E9PNE6;B3KTV0;E9PN89;B4E1Q1;A8K7Q2;A0A024R6B5;P54652;B3KUS2	V9HW22	302	311	HEL-S-72p;HSPA8;HSPA2	Heat shock cognate 71 kDa protein;Heat shock-related 70 kDa protein 2	5354300	145	1
349	GPAVGIDLGTTYSCVGVFQHGK	K	V	22	0	2262.11	V9HW22;P11142;E9PKE3;Q53GZ6;Q53HF2;P11142-2;E9PNE6;B3KTV0;B4DTX2;E9PQQ4;E9PQK7;E9PK54;E9PLF4;E9PPY6;E9PN25;E9PI65	V9HW22	4	25	HEL-S-72p;HSPA8	Heat shock cognate 71 kDa protein	7790400	145	1
421	IINEPTAAAIAYGLDKK	R	V	17	1	1786.98	V9HW22;P11142;E9PKE3;Q53HF2;P11142-2;Q96IS6;B3KTV0;B4DTX2;E9PN89;B4E1Q1;E9PI65;A0A024R6B5;P54652	V9HW22	172	188	HEL-S-72p;HSPA8;HSPA2	Heat shock cognate 71 kDa protein;Heat shock-related 70 kDa protein 2	3746000	145	1
614	LYQSAGGMPGGMPGGFPGGGAPPSGGASSGPTIEEVD	K	-	37	0	3345.49	V9HW22;P11142;E9PKE3;Q53GZ6;Q96IS6;E9PNE6;B4E1Q1;A8K7Q2;Q96BE0;Q9NZ87;Q9NWW3;Q96H53	V9HW22	610	646	HEL-S-72p;HSPA8	Heat shock cognate 71 kDa protein	12285000	145	1
634	MKEIAEAYLGK	K	T	11	1	1251.65	V9HW22;P11142;E9PKE3;Q53GZ6;Q53HF2;P11142-2;Q96IS6;B3KTV0;B4DTX2;E9PN89;E9PQQ4;E9PQK7;E9PK54;E9PLF4;E9PPY6;E9PI65;A4D111	V9HW22	127	137	HEL-S-72p;HSPA8;LOC401308	Heat shock cognate 71 kDa protein	12143000	145	2
694	NQVAMNPTNTVFDAK	K	R	15	0	1648.79	V9HW22;P11142;E9PKE3;Q53GZ6;Q53HF2;P11142-2;E9PNE6;B4DTX2;E9PQQ4;E9PQK7;E9PK54;E9PLF4;E9PPY6;E9PN25	V9HW22	57	71	HEL-S-72p;HSPA8	Heat shock cognate 71 kDa protein	37413000	145	1
695	NQVAMNPTNTVFDAKR	K	L	16	1	1804.89	V9HW22;P11142;E9PKE3;Q53GZ6;Q53HF2;P11142-2;E9PNE6;B4DTX2;E9PQQ4;E9PQK7;E9PK54;E9PLF4;E9PPY6;E9PN25	V9HW22	57	72	HEL-S-72p;HSPA8	Heat shock cognate 71 kDa protein	13884000	145	2
698	NSLESYAFNMK	K	A	11	0	1302.59	V9HW22;P11142;E9PKE3;Q53GZ6;Q96IS6;E9PNE6;B3KTV0;B4E1Q1;A8K7Q2;Q96BE0;Q9NZ87;Q9NWW3;Q96H53;E9PS65;E9PM13	V9HW22	540	550	HEL-S-72p;HSPA8	Heat shock cognate 71 kDa protein	26291000	145	1
753	QTQTFTTYSDNQPGVLIQVYEGER	K	A	24	0	2773.32	V9HW22;P11142;E9PKE3;Q53GZ6;Q53HF2;P11142-2;Q96IS6;E9PNE6;B3KTV0;B4E1Q1;A8K7Q2;Q96BE0;E9PS65	V9HW22	424	447	HEL-S-72p;HSPA8	Heat shock cognate 71 kDa protein	1215000	145	1
765	RFDDAVVQSDMK	R	H	12	1	1409.66	V9HW22;P11142;E9PKE3;Q53GZ6;Q53HF2;P11142-2;Q96IS6;E9PNE6;B4DTX2;E9PN89;E9PQQ4;E9PQK7;E9PK54;E9PLF4;E9PPY6;E9PN25;A4D111	V9HW22	77	88	HEL-S-72p;HSPA8;LOC401308	Heat shock cognate 71 kDa protein	8077000	145	2
808	SFYPEEVSSMVLTK	K	M	14	0	1615.78	V9HW22;P11142;E9PKE3;Q53GZ6;Q53HF2;P11142-2;Q96IS6;B3KTV0;B4DTX2;E9PN89;E9PQQ4;E9PQK7;E9PK54;E9PLF4;E9PPY6;E9PN25;E9PI65	V9HW22	113	126	HEL-S-72p;HSPA8	Heat shock cognate 71 kDa protein	17161000	145	1
858	SQIHDIVLVGGSTR	K	I	14	0	1480.8	V9HW22;P11142;E9PKE3;Q53GZ6;Q53HF2;P11142-2;Q96IS6;E9PNE6;B3KTV0;E9PN89;B4E1Q1;A8K7Q2	V9HW22	329	342	HEL-S-72p;HSPA8	Heat shock cognate 71 kDa protein	8304100	145	1
867	STAGDTHLGGEDFDNR	K	M	16	0	1690.72	V9HW22;P11142;E9PKE3;Q53GZ6;Q53HF2;P11142-2;Q96IS6;B3KTV0;E9PN89;A0A024R6B5;P54652	V9HW22	221	236	HEL-S-72p;HSPA8;HSPA2	Heat shock cognate 71 kDa protein;Heat shock-related 70 kDa protein 2	16156000	145	1
953	TTPSYVAFTDTER	R	L	13	0	1486.69	Q53FC7;B3KSM6;B2R6X5;P48741;P17066;B4DNV4;B4DXY3;B4DI39;B4DWK5;Q53FA3;B2RCQ9;B4DI54;P34931;B4E1T6;V9HW22;P11142;E9PKE3;Q53GZ6;Q53HF2;P11142-2;E9PNE6;B3KTV0;B4DTX2;E9PQQ4;E9PQK7;E9PK54;E9PLF4;E9PPY6;E9PN25;E9PI65;A0A024R6B5;P54652;B3KUS2;B4DFN9;P0DMV8-2;P0DMV9;P0DMV8;A8K5I0;A0A0G2JIW1;Q59EJ3;B4DNX1	V9HW22	37	49	HSPA7;HSPA6;HSPA1L;HEL-S-72p;HSPA8;HSPA2;HEL-S-103	Putative heat shock 70 kDa protein 7;Heat shock 70 kDa protein 6;Heat shock 70 kDa protein 1-like;Heat shock cognate 71 kDa protein;Heat shock-related 70 kDa protein 2	41644000	145;69;51	1
957	TVTNAVVTVPAYFNDSQR	K	Q	18	0	1980.99	V9HW22;P11142;Q53GZ6;Q53HF2;P11142-2;Q96IS6;B3KTV0;B4DTX2;E9PN89;E9PQQ4;E9PQK7;E9PK54;E9PLF4;E9PI65	V9HW22	138	155	HEL-S-72p;HSPA8	Heat shock cognate 71 kDa protein	6634800	145	2
523	LATQSNEITIPVTFESR	K	A	17	0	1904.98	V9HW43;P04792;B4DL87;C9J3N8	V9HW43	172	188	HEL-S-102;HSPB1	Heat shock protein beta-1	4913100	138	1
539	LFDQAFGLPR	R	L	10	0	1162.61	V9HW43;P04792;F8WE04	V9HW43	28	37	HEL-S-102;HSPB1	Heat shock protein beta-1	4452200	138	1
1033	VSLDVNHFAPDELTVK	R	T	16	0	1782.92	V9HW43;P04792;B4DL87;F8WE04	V9HW43	97	112	HEL-S-102;HSPB1	Heat shock protein beta-1	10503000	138	1
29	AFEEAEKNAPAIIFIDELDAIAPKR	K	E	25	2	2770.45	V9HW80;P55072;Q96IF9;Q9HAP1	V9HW80	289	313	HEL-S-70;VCP	Transitional endoplasmic reticulum ATPase	3571900	151	2
48	AIANECQANFISIK	K	G	14	0	1577.79	V9HW80;P55072;Q96IF9;Q0IIN5;Q9NTC4;Q9HAP0	V9HW80	530	543	HEL-S-70;VCP;DKFZp434K0126	Transitional endoplasmic reticulum ATPase	25108000	151	1
200	DVDLEFLAK	K	M	9	0	1048.54	V9HW80;P55072;Q96IF9;Q0IIN5;Q9NTC4	V9HW80	669	677	HEL-S-70;VCP;DKFZp434K0126	Transitional endoplasmic reticulum ATPase	717520	151	1
212	EAVCIVLSDDTCSDEK	R	I	16	0	1839.79	V9HW80;P55072;Q9HAP1;C9JUP7;C9IZA5	V9HW80	66	81	HEL-S-70;VCP	Transitional endoplasmic reticulum ATPase	0	151	1
216	EDEEESLNEVGYDDIGGCR	R	K	19	0	2184.88	V9HW80;P55072;Q96IF9;Q9HAP1	V9HW80	192	210	HEL-S-70;VCP	Transitional endoplasmic reticulum ATPase	3790800	151	2
243	ELQELVQYPVEHPDK	R	F	15	0	1822.91	V9HW80;P55072;Q96IF9;Q0IIN5;Q9NTC4;Q9HAP0	V9HW80	488	502	HEL-S-70;VCP;DKFZp434K0126	Transitional endoplasmic reticulum ATPase	9175900	151	2
244	ELQELVQYPVEHPDKFLK	R	F	18	1	2211.16	V9HW80;P55072;Q96IF9;Q0IIN5;Q9NTC4;Q9HAP0	V9HW80	488	505	HEL-S-70;VCP;DKFZp434K0126	Transitional endoplasmic reticulum ATPase	16806000	151	1
250	EMVELPLRHPALFK	K	A	14	1	1678.92	V9HW80;P55072;Q96IF9;Q9HAP1	V9HW80	218	231	HEL-S-70;VCP	Transitional endoplasmic reticulum ATPase	7055800	151	1
253	ERQTNPSAMEVEEDDPVPEIR	R	R	21	1	2440.12	V9HW80;P55072;Q96IF9;Q0IIN5;Q9NTC4	V9HW80	712	732	HEL-S-70;VCP;DKFZp434K0126	Transitional endoplasmic reticulum ATPase	12163000	151	2
262	ETVVEVPQVTWEDIGGLEDVKR	R	E	22	1	2497.27	V9HW80;P55072;Q96IF9;Q0IIN5;Q9NTC4;Q9HAP0	V9HW80	466	487	HEL-S-70;VCP;DKFZp434K0126	Transitional endoplasmic reticulum ATPase	62952000	151	1
266	EVDIGIPDATGR	R	L	12	0	1241.63	V9HW80;P55072;Q96IF9;Q0IIN5	V9HW80	366	377	HEL-S-70;VCP	Transitional endoplasmic reticulum ATPase	13685000	151	1
267	EVDIGIPDATGRLEILQIHTK	R	N	21	1	2317.26	V9HW80;P55072;Q96IF9;Q0IIN5	V9HW80	366	386	HEL-S-70;VCP	Transitional endoplasmic reticulum ATPase	15031000	151	1
276	FDREVDIGIPDATGR	R	L	15	1	1659.82	V9HW80;P55072;Q96IF9;Q0IIN5	V9HW80	363	377	HEL-S-70;VCP	Transitional endoplasmic reticulum ATPase	5126900	151	1
350	GPELLTMWFGESEANVR	K	E	17	0	1934.92	V9HW80;P55072;Q96IF9;Q0IIN5;Q9NTC4;Q9HAP0	V9HW80	544	560	HEL-S-70;VCP;DKFZp434K0126	Transitional endoplasmic reticulum ATPase	10759000	151	2
480	KGDIFLVR	R	G	8	1	946.56	V9HW80;P55072;Q9HAP1;C9JUP7;C9IZA5	V9HW80	148	155	HEL-S-70;VCP	Transitional endoplasmic reticulum ATPase	7440300	151	1
486	KKMDLIDLEDETIDAEVMNSLAVTMDDFR	R	W	29	2	3356.58	V9HW80;P55072;Q96IF9;Q0IIN5;Q9NTC4	V9HW80	425	453	HEL-S-70;VCP;DKFZp434K0126	Transitional endoplasmic reticulum ATPase	22897000	151	1
506	KYEMFAQTLQQSR	R	G	13	1	1628.8	V9HW80;P55072;Q96IF9;Q0IIN5;Q9NTC4	V9HW80	754	766	HEL-S-70;VCP;DKFZp434K0126	Transitional endoplasmic reticulum ATPase	36469000	151	2
511	LADDVDLEQVANETHGHVGADLAALCSEAALQAIR	K	K	35	0	3671.78	V9HW80;P55072;Q96IF9;Q0IIN5;Q9NTC4;Q9HAP0	V9HW80	390	424	HEL-S-70;VCP;DKFZp434K0126	Transitional endoplasmic reticulum ATPase	10257000	151	2
512	LADDVDLEQVANETHGHVGADLAALCSEAALQAIRK	K	K	36	1	3799.88	V9HW80;P55072;Q96IF9;Q0IIN5;Q9NTC4;Q9HAP0	V9HW80	390	425	HEL-S-70;VCP;DKFZp434K0126	Transitional endoplasmic reticulum ATPase	7098500	151	1
516	LAGESESNLRK	K	A	11	1	1202.63	V9HW80;P55072;Q96IF9;Q9HAP1	V9HW80	278	288	HEL-S-70;VCP	Transitional endoplasmic reticulum ATPase	5664400	151	1
530	LDQLIYIPLPDEK	R	S	13	0	1555.85	V9HW80;P55072;Q96IF9;Q0IIN5;Q9NTC4	V9HW80	639	651	HEL-S-70;VCP;DKFZp434K0126	Transitional endoplasmic reticulum ATPase	13356000	151	1
543	LGDVISIQPCPDVK	R	Y	14	0	1539.8	V9HW80;P55072;Q9HAP1;C9JUP7;C9IZA5	V9HW80	96	109	HEL-S-70;VCP	Transitional endoplasmic reticulum ATPase	24047000	151	1
561	LIVDEAINEDNSVVSLSQPK	R	M	20	0	2169.12	V9HW80;P55072	V9HW80	26	45	HEL-S-70;VCP	Transitional endoplasmic reticulum ATPase	40612000	151	2
624	MDLIDLEDETIDAEVMNSLAVTMDDFR	K	W	27	0	3100.39	V9HW80;P55072;Q96IF9;Q0IIN5;Q9NTC4	V9HW80	427	453	HEL-S-70;VCP;DKFZp434K0126	Transitional endoplasmic reticulum ATPase	0	151	1
652	MTNGFSGADLTEICQR	K	A	16	0	1798.8	V9HW80;P55072;Q96IF9;Q0IIN5;Q9NTC4	V9HW80	678	693	HEL-S-70;VCP;DKFZp434K0126	Transitional endoplasmic reticulum ATPase	6334700	151	1
664	NAPAIIFIDELDAIAPK	K	R	17	0	1809.99	V9HW80;P55072;Q96IF9;Q9HAP1	V9HW80	296	312	HEL-S-70;VCP	Transitional endoplasmic reticulum ATPase	59668000	151	2
665	NAPAIIFIDELDAIAPKR	K	E	18	1	1966.09	V9HW80;P55072;Q96IF9;Q9HAP1	V9HW80	296	313	HEL-S-70;VCP	Transitional endoplasmic reticulum ATPase	4649700	151	2
704	NVFIIGATNRPDIIDPAILRPGR	K	L	23	2	2517.42	V9HW80;P55072;Q96IF9;Q0IIN5;Q9NTC4;Q9HAP0	V9HW80	616	638	HEL-S-70;VCP;DKFZp434K0126	Transitional endoplasmic reticulum ATPase	3345600	151	1
717	QAAPCVLFFDELDSIAK	R	A	17	0	1922.94	V9HW80;P55072;Q96IF9;Q0IIN5;Q9NTC4;Q9HAP0	V9HW80	568	584	HEL-S-70;VCP;DKFZp434K0126	Transitional endoplasmic reticulum ATPase	25937000	151	1
751	QTNPSAMEVEEDDPVPEIR	R	R	19	0	2154.97	V9HW80;P55072;Q96IF9;Q0IIN5;Q9NTC4	V9HW80	714	732	HEL-S-70;VCP;DKFZp434K0126	Transitional endoplasmic reticulum ATPase	11730000	151	3
752	QTNPSAMEVEEDDPVPEIRR	R	D	20	1	2311.07	V9HW80;P55072;Q96IF9;Q0IIN5;Q9NTC4	V9HW80	714	733	HEL-S-70;VCP;DKFZp434K0126	Transitional endoplasmic reticulum ATPase	10704000	151	1
782	RSVSDNDIR	R	K	9	1	1060.53	V9HW80;P55072;Q96IF9;Q0IIN5;Q9NTC4	V9HW80	745	753	HEL-S-70;VCP;DKFZp434K0126	Transitional endoplasmic reticulum ATPase	5994600	151	1
1002	VINQILTEMDGMSTK	R	K	15	0	1678.83	V9HW80;P55072;Q96IF9;Q0IIN5;Q9NTC4;Q9HAP0	V9HW80	600	614	HEL-S-70;VCP;DKFZp434K0126	Transitional endoplasmic reticulum ATPase	11553000	151	1
1045	WALSQSNPSALR	R	E	12	0	1328.68	V9HW80;P55072;Q96IF9;Q0IIN5;Q9NTC4;Q9HAP0	V9HW80	454	465	HEL-S-70;VCP;DKFZp434K0126	Transitional endoplasmic reticulum ATPase	34718000	151	1
1046	WALSQSNPSALRETVVEVPQVTWEDIGGLEDVKR	R	E	34	2	3807.94	V9HW80;P55072;Q96IF9;Q0IIN5;Q9NTC4;Q9HAP0	V9HW80	454	487	HEL-S-70;VCP;DKFZp434K0126	Transitional endoplasmic reticulum ATPase	4251400	151	1
1065	YEMFAQTLQQSR	K	G	12	0	1500.7	V9HW80;P55072;Q96IF9;Q0IIN5;Q9NTC4	V9HW80	755	766	HEL-S-70;VCP;DKFZp434K0126	Transitional endoplasmic reticulum ATPase	2264100	151	1
5	AAFDDAIAELDTLSEESYKDSTLIMQLLR	K	D	29	1	3257.6	V9HW98;P62258;K7EM20;B7ZA86;G9K389;G9K388;P62258-2	V9HW98	197	225	HEL2;YWHAE;YWHAE/FAM22B fusion;YWHAE/FAM22A fusion	14-3-3 protein epsilon	28869000	156	2
193	DSTLIMQLLR	K	D	10	0	1188.65	B4DE78;B3KNB4;P61981;B4DHC4;V9HWD6;B5BU24;B2R6N6;P31947-2;P31946-2;P31946;P31947;D0PNI1;E7EX29;P63104;B0AZS6;Q2F831;B7Z2E6;H0YB80;P63104-2;V9HW98;P62258;K7EM20;B7ZA86;G9K389;G9K388;P62258-2;Q9H4N8;A0A024R1K7;Q04917;B4DY04;Q53S41;B4DMT8;P27348	V9HW98	213	222	YWHAG;HEL-S-1;YWHAB;SFN;YWHAZ;HEL2;YWHAE;YWHAE/FAM22B fusion;YWHAE/FAM22A fusion;YWHAH;YWHAQ	14-3-3 protein gamma;14-3-3 protein gamma, N-terminally processed;14-3-3 protein sigma;14-3-3 protein beta/alpha;14-3-3 protein beta/alpha, N-terminally processed;14-3-3 protein zeta/delta;14-3-3 protein epsilon;14-3-3 protein eta;14-3-3 protein theta	2345400	109;156;76;5;85	1
204	EAAENSLVAYK	K	A	11	0	1193.59	V9HW98;P62258;K7EM20;B7ZA86;G9K389;G9K388;P62258-2	V9HW98	143	153	HEL2;YWHAE;YWHAE/FAM22B fusion;YWHAE/FAM22A fusion	14-3-3 protein epsilon	6558800	156	1
620	MDDREDLVYQAK	-	L	12	1	1481.68	V9HW98;P62258;I3L0W5;B4DJF2;I3L3T1;B4DJB0	V9HW98	1	12	HEL2;YWHAE	14-3-3 protein epsilon	17385000	156	1
1079	YLAEFATGNDRK	R	E	12	1	1383.68	V9HW98;P62258;K7EM20;B7ZA86;G9K389;G9K388;P62258-2;B3KT37	V9HW98	131	142	HEL2;YWHAE;YWHAE/FAM22B fusion;YWHAE/FAM22A fusion	14-3-3 protein epsilon	5997900	156	2
103	AVEEKIEWLESHQDADIEDFKAK	K	K	23	2	2729.32	V9HWB4;P11021	V9HWB4	597	619	HEL-S-89n;HSPA5	78 kDa glucose-regulated protein	4556900	144	1
182	DNHLLGTFDLTGIPPAPR	K	G	18	0	1933.01	V9HWB4;P11021	V9HWB4	475	492	HEL-S-89n;HSPA5	78 kDa glucose-regulated protein	1016300	144	1
278	FEELNMDLFR	K	S	10	0	1312.61	V9HWB4;P11021	V9HWB4	327	336	HEL-S-89n;HSPA5	78 kDa glucose-regulated protein	1431100	144	1
404	IEIESFYEGEDFSETLTR	R	A	18	0	2163.98	V9HWB4;P11021	V9HWB4	307	324	HEL-S-89n;HSPA5	78 kDa glucose-regulated protein	4017900	144	1
406	IEWLESHQDADIEDFKAK	K	K	18	1	2173.03	V9HWB4;P11021	V9HWB4	602	619	HEL-S-89n;HSPA5	78 kDa glucose-regulated protein	9954300	144	2
422	IINEPTAAAIAYGLDKR	R	E	17	1	1814.99	V9HWB4;P11021;B4DEF7	V9HWB4	198	214	HEL-S-89n;HSPA5	78 kDa glucose-regulated protein	8991000	144	2
455	ITPSYVAFTPEGER	R	L	14	0	1565.77	V9HWB4;P11021;B4DEF7	V9HWB4	61	74	HEL-S-89n;HSPA5	78 kDa glucose-regulated protein	8997700	144	1
485	KKELEEIVQPIISK	K	L	14	2	1652.97	V9HWB4;P11021	V9HWB4	620	633	HEL-S-89n;HSPA5	78 kDa glucose-regulated protein	9116300	144	1
498	KSDIDEIVLVGGSTR	K	I	15	1	1587.85	V9HWB4;P11021	V9HWB4	353	367	HEL-S-89n;HSPA5	78 kDa glucose-regulated protein	3379200	144	1
668	NELESYAYSLK	R	N	11	0	1315.63	V9HWB4;P11021	V9HWB4	563	573	HEL-S-89n;HSPA5	78 kDa glucose-regulated protein	6065300	144	1
692	NQLTSNPENTVFDAK	K	R	15	0	1676.8	V9HWB4;P11021;B4DEF7	V9HWB4	82	96	HEL-S-89n;HSPA5	78 kDa glucose-regulated protein	9925100	144	1
693	NQLTSNPENTVFDAKR	K	L	16	1	1832.9	V9HWB4;P11021;B4DEF7	V9HWB4	82	97	HEL-S-89n;HSPA5	78 kDa glucose-regulated protein	4256900	144	1
857	SQIFSTASDNQPTVTIK	K	V	17	0	1835.93	V9HWB4;P11021	V9HWB4	448	464	HEL-S-89n;HSPA5	78 kDa glucose-regulated protein	5229500	144	2
961	TWNDPSVQQDIK	R	F	12	0	1429.68	V9HWB4;P11021;B4DEF7	V9HWB4	102	113	HEL-S-89n;HSPA5	78 kDa glucose-regulated protein	6245700	144	0
1037	VTHAVVTVPAYFNDAQR	K	Q	17	0	1886.96	V9HWB4;P11021;B4DEF7	V9HWB4	165	181	HEL-S-89n;HSPA5	78 kDa glucose-regulated protein	4435000	144	1
166	DGQVINETSQHHDDLE	R	-	16	0	1835.79	V9HWE1;P08670;Q53HU8	V9HWE1	451	466	HEL113;VIM	Vimentin	18183000	141	1
217	EEAENTLQSFR	R	Q	11	0	1322.61	V9HWE1;P08670;B3KRK8;B0YJC4;Q53HU8;B0YJC5;Q5JVS8	V9HWE1	197	207	HEL113;VIM	Vimentin	6627900	141	1
218	EEAENTLQSFRQDVDNASLAR	R	L	21	1	2392.13	V9HWE1;P08670;B3KRK8;B0YJC4;Q53HU8;B0YJC5;Q5JVS8	V9HWE1	197	217	HEL113;VIM	Vimentin	5060200	141	1
238	EKLQEEMLQREEAENTLQSFR	R	Q	21	2	2607.26	V9HWE1;P08670;B3KRK8;B0YJC4;Q53HU8	V9HWE1	187	207	HEL113;VIM	Vimentin	14244000	141	2
248	EMEENFAVEAANYQDTIGR	R	L	19	0	2185.96	V9HWE1;P08670;B3KRK8;B0YJC4;Q53HU8;B0YJC5	V9HWE1	346	364	HEL113;VIM	Vimentin	13156000	141	2
259	ETNLDSLPLVDTHSK	R	R	15	0	1667.84	V9HWE1;P08670;Q53HU8	V9HWE1	425	439	HEL113;VIM	Vimentin	12390000	141	2
429	ILLAELEQLKGQGK	K	S	14	1	1538.9	V9HWE1;P08670;B3KRK8;B0YJC4;Q53HU8	V9HWE1	130	143	HEL113;VIM	Vimentin	43494000	141	2
503	KVESLQEEIAFLK	R	K	13	1	1532.85	V9HWE1;P08670;B3KRK8;B0YJC4;B0YJC5;Q5JVS8	V9HWE1	223	235	HEL113;VIM	Vimentin	10174000	141	1
504	KVESLQEEIAFLKK	R	L	14	2	1660.94	V9HWE1;P08670;B3KRK8;B0YJC4;B0YJC5;Q5JVS8	V9HWE1	223	236	HEL113;VIM	Vimentin	32037000	141	2
541	LGDLYEEEMR	R	E	10	0	1253.56	V9HWE1;P08670;B3KRK8;B0YJC4;Q53HU8	V9HWE1	146	155	HEL113;VIM	Vimentin	16185000	141	1
542	LGDLYEEEMRELR	R	R	13	1	1651.79	V9HWE1;P08670;B3KRK8;B0YJC4;Q53HU8	V9HWE1	146	158	HEL113;VIM	Vimentin	9307000	141	1
575	LQDEIQNMKEEMAR	R	H	14	1	1733.81	V9HWE1;P08670;B3KRK8;B0YJC4;Q53HU8;B0YJC5	V9HWE1	365	378	HEL113;VIM	Vimentin	24186000	141	2
576	LQEEMLQREEAENTLQSFR	K	Q	19	1	2350.12	V9HWE1;P08670;B3KRK8;B0YJC4;Q53HU8;B0YJC5;Q5JVS8	V9HWE1	189	207	HEL113;VIM	Vimentin	21098000	141	1
577	LQEEMLQREEAENTLQSFRQDVDNASLAR	K	L	29	2	3419.64	V9HWE1;P08670;B3KRK8;B0YJC4;Q53HU8;B0YJC5;Q5JVS8	V9HWE1	189	217	HEL113;VIM	Vimentin	16346000	141	1
615	MALDIEIATYR	K	K	11	0	1294.66	V9HWE1;P08670;B3KRK8;B0YJC4;Q53HU8;B0YJC5;H7C5W5;B3KWQ6;P41219;P41219-2	V9HWE1	391	401	HEL113;VIM;PRPH	Vimentin;Peripherin	3480200	141	1
616	MALDIEIATYRK	K	L	12	1	1422.75	V9HWE1;P08670;B3KRK8;B0YJC4;Q53HU8;B0YJC5;H7C5W5;B3KWQ6;P41219;P41219-2	V9HWE1	391	402	HEL113;VIM;PRPH	Vimentin;Peripherin	1606600	141	1
629	MFGGPGTASRPSSSR	R	S	15	1	1493.7	V9HWE1;P08670;B3KRK8;B0YJC4;Q53HU8	V9HWE1	14	28	HEL113;VIM	Vimentin	3900300	141	1
677	NLQEAEEWYK	K	S	10	0	1308.6	V9HWE1;P08670;B3KRK8;B0YJC4;Q53HU8;B0YJC5;Q5JVS8;H7C5W5;B3KWQ6;P41219;P41219-2;F8W835	V9HWE1	283	292	HEL113;VIM;PRPH	Vimentin;Peripherin	17953000	141	1
745	QQYESVAAK	R	N	9	0	1022.5	V9HWE1;P08670;B3KRK8;B0YJC4;Q53HU8;B0YJC5;Q5JVS8	V9HWE1	274	282	HEL113;VIM	Vimentin	9953800	141	1
757	QVDQLTNDKAR	R	V	11	1	1286.66	V9HWE1;P08670;B3KRK8;B0YJC4;Q53HU8	V9HWE1	160	170	HEL113;VIM	Vimentin	2296200	141	1
759	QVQSLTCEVDALK	R	G	13	0	1489.74	V9HWE1;P08670;B3KRK8;B0YJC4;Q53HU8;B0YJC5;Q5JVS8	V9HWE1	322	334	HEL113;VIM	Vimentin	7351600	141	1
760	QVQSLTCEVDALKGTNESLER	R	Q	21	1	2376.16	V9HWE1;P08670;B3KRK8;B0YJC4;Q53HU8;B0YJC5	V9HWE1	322	342	HEL113;VIM	Vimentin	63761000	141	2
780	RQVDQLTNDK	R	A	10	1	1215.62	V9HWE1;P08670;B3KRK8;B0YJC4;Q53HU8	V9HWE1	159	168	HEL113;VIM	Vimentin	3887200	141	1
837	SLYASSPGGVYATR	R	S	14	0	1427.7	V9HWE1;P08670;B3KRK8;B0YJC4;Q53HU8	V9HWE1	51	64	HEL113;VIM	Vimentin	30169000	141	1
861	SRLGDLYEEEMRELR	K	R	15	2	1894.92	V9HWE1;P08670;B3KRK8;B0YJC4;Q53HU8	V9HWE1	144	158	HEL113;VIM	Vimentin	1050500	141	1
927	TNEKVELQELNDR	R	F	13	1	1586.79	V9HWE1;P08670;B3KRK8;B0YJC4;Q53HU8;B4DUI0;Q9H319;Q53SB5;Q45VM8;Q45VM7;Q45VM6;L7RDA5;A5Z217;P17661	V9HWE1	101	113	HEL113;VIM;tmp_locus_29;DES	Vimentin;Desmin	13206000	141	1
981	VESLQEEIAFLK	K	K	12	0	1404.75	V9HWE1;P08670;B3KRK8;B0YJC4;B0YJC5;Q5JVS8	V9HWE1	224	235	HEL113;VIM	Vimentin	2328900	141	1
983	VEVERDNLAEDIMR	R	L	14	1	1687.82	V9HWE1;P08670;B3KRK8;B0YJC4;Q53HU8	V9HWE1	171	184	HEL113;VIM	Vimentin	14511000	141	1
