# Supplementary material for: PRAME induces genomic instability in uveal melanoma
Source: Oncogene. 2023 Nov 29;43(8):555–65. doi: 10.1038/s41388-023-02887-0 (PMC10873199; doi:10.1038/s41388-023-02887-0)
Supplement: Supplementary file 9 — Supplementary Table 3 [file 41388_2023_2887_MOESM9_ESM.xlsx]

## Sheet: Sheet1
Proteins	Positions within proteins	Fasta headers	PEP	Number of GlyGly (K)	Amino acid	GlyGly (K) Probabilities	Charge	Mass error [ppm]	MEL290 TET-PRAME	MEL290 TET-PRAME DOXY	Log2 MEL290 PRAME	F41 gRNA2 PRAME	F41 gRNA2 PRAME DOXY	Log2 F41 PRAME
sp|Q93077|H2A1C_HUMAN;sp|Q7L7L0|H2A3_HUMAN;sp|P04908|H2A1B_HUMAN	119;119;119	>sp|Q93077|H2A1C_HUMAN Histone H2A type 1-C OS=Homo sapiens OX=9606 GN=HIST1H2AC PE=1 SV=3;>sp|Q7L7L0|H2A3_HUMAN Histone H2A type 3 OS=Homo sapiens OX=9606 GN=HIST3H2A PE=1 SV=3;>sp|P04908|H2A1B_HUMAN Histone H2A type 1-B/E OS=Homo sapiens OX=9606 GN=HIST1	6.87998e-154	1	K	VTIAQGGVLPNIQAVLLPK(0.5)K(0.5)	2	-0.20797	2.01268e+09	1	-30.9065	2627700000	1	31.2912
sp|Q93077|H2A1C_HUMAN;sp|Q7L7L0|H2A3_HUMAN;sp|P04908|H2A1B_HUMAN	120;120;120	>sp|Q93077|H2A1C_HUMAN Histone H2A type 1-C OS=Homo sapiens OX=9606 GN=HIST1H2AC PE=1 SV=3;>sp|Q7L7L0|H2A3_HUMAN Histone H2A type 3 OS=Homo sapiens OX=9606 GN=HIST3H2A PE=1 SV=3;>sp|P04908|H2A1B_HUMAN Histone H2A type 1-B/E OS=Homo sapiens OX=9606 GN=HIST1	6.87998e-154	1	K	VTIAQGGVLPNIQAVLLPK(0.5)K(0.5)	2	-0.20797	2.01268e+09	1	-30.9065	2627700000	1	31.2912
sp|Q16777|H2A2C_HUMAN;sp|Q99878|H2A1J_HUMAN;sp|Q96KK5|H2A1H_HUMAN;sp|Q9BTM1|H2AJ_HUMAN;sp|Q6FI13|H2A2A_HUMAN;sp|P20671|H2A1D_HUMAN;sp|P0C0S8|H2A1_HUMAN	119;119;119;119;119;119;119	>sp|Q16777|H2A2C_HUMAN Histone H2A type 2-C OS=Homo sapiens OX=9606 GN=HIST2H2AC PE=1 SV=4;>sp|Q99878|H2A1J_HUMAN Histone H2A type 1-J OS=Homo sapiens OX=9606 GN=HIST1H2AJ PE=1 SV=3;>sp|Q96KK5|H2A1H_HUMAN Histone H2A type 1-H OS=Homo sapiens OX=9606 GN=HIS	6.87998e-154	1	K	VTIAQGGVLPNIQAVLLPK(0.744)K(0.182)TESHK(0.074)	3	-0.64249	2.01268e+09	1	-30.9065	2627700000	1	31.2912
sp|Q16777|H2A2C_HUMAN;sp|Q99878|H2A1J_HUMAN;sp|Q96KK5|H2A1H_HUMAN;sp|Q9BTM1|H2AJ_HUMAN;sp|Q6FI13|H2A2A_HUMAN;sp|P20671|H2A1D_HUMAN;sp|P0C0S8|H2A1_HUMAN	120;120;120;120;120;120;120	>sp|Q16777|H2A2C_HUMAN Histone H2A type 2-C OS=Homo sapiens OX=9606 GN=HIST2H2AC PE=1 SV=4;>sp|Q99878|H2A1J_HUMAN Histone H2A type 1-J OS=Homo sapiens OX=9606 GN=HIST1H2AJ PE=1 SV=3;>sp|Q96KK5|H2A1H_HUMAN Histone H2A type 1-H OS=Homo sapiens OX=9606 GN=HIS	6.87998e-154	1	K	VTIAQGGVLPNIQAVLLPK(0.5)K(0.5)	2	-0.20797	2.01268e+09	1	-30.9065	2627700000	1	31.2912
sp|P54727|RD23B_HUMAN	78	>sp|P54727|RD23B_HUMAN UV excision repair protein RAD23 homolog B OS=Homo sapiens OX=9606 GN=RAD23B PE=1 SV=1	0.00157382	1	K	NFVVVMVTK(0.5)PK(0.5)	2	0.22465	1	4.442e+06	22.0828	117250000	1	26.805
sp|P49327|FAS_HUMAN	1866	>sp|P49327|FAS_HUMAN Fatty acid synthase OS=Homo sapiens OX=9606 GN=FASN PE=1 SV=3	4.7109e-25	1	K	VVVQVLAEEPEAVLK(0.974)GAK(0.023)PK(0.003)	4	1.5609	3.97267e+08	2.11907e+08	-0.906676	113490000	1	26.758
sp|Q86YT6|MIB1_HUMAN	495	>sp|Q86YT6|MIB1_HUMAN E3 ubiquitin-protein ligase MIB1 OS=Homo sapiens OX=9606 GN=MIB1 PE=1 SV=1	0.000107297	1	K	QNVDVEAEDK(1)DGDR	2	-0.178	2.86409e+07	4.85948e+06	-2.55921	76692000	1	26.1926
sp|P78395|PRAME_HUMAN	157	>sp|P78395|PRAME_HUMAN Melanoma antigen preferentially expressed in tumors OS=Homo sapiens OX=9606 GN=PRAME PE=1 SV=1	1.5866e-15	1	K	ASLYSFPEPEAAQPMTK(0.847)K(0.153)	3	0.10414	1	4.68063e+07	25.4802	73399000	1	26.1293
sp|P17302|CXA1_HUMAN	128	>sp|P17302|CXA1_HUMAN Gap junction alpha-1 protein OS=Homo sapiens OX=9606 GN=GJA1 PE=1 SV=2	4.78879e-05	1	K	VAQTDGVNVDMHLK(0.999)QIEIK(0.001)	3	-1.1537	1	1	0	72139000	1	26.1043
sp|P00338|LDHA_HUMAN	126	>sp|P00338|LDHA_HUMAN L-lactate dehydrogenase A chain OS=Homo sapiens OX=9606 GN=LDHA PE=1 SV=2	0.000400197	1	K	FIIPNVVK(0.999)YSPNCK(0.001)	3	4.4356	1	7.93318e+06	22.9195	68189000	1	26.023
sp|P04406|G3P_HUMAN	84	>sp|P04406|G3P_HUMAN Glyceraldehyde-3-phosphate dehydrogenase OS=Homo sapiens OX=9606 GN=GAPDH PE=1 SV=3	6.38201e-05	1	K	LVINGNPITIFQERDPSK(0.593)IK(0.407)	4	0.44826	1.38346e+08	1	-27.0437	62185000	1	25.8901
sp|P23634|AT2B4_HUMAN	314	>sp|P23634|AT2B4_HUMAN Plasma membrane calcium-transporting ATPase 4 OS=Homo sapiens OX=9606 GN=ATP2B4 PE=1 SV=2	2.88403e-44	1	K	AK(1)TQDGVALEIQPLNSQEGIDNEEKDKK	4	0.49446	1.1842e+08	6.52279e+07	-0.860357	61508000	1	25.8743
sp|Q15365|PCBP1_HUMAN	119	>sp|Q15365|PCBP1_HUMAN Poly(rC)-binding protein 1 OS=Homo sapiens OX=9606 GN=PCBP1 PE=1 SV=2	4.54966e-09	1	K	LVVPATQCGSLIGK(0.349)GGCK(0.651)	3	0.22256	1	7.04976e+06	22.7491	60847000	1	25.8587
sp|P45880|VDAC2_HUMAN	120	>sp|P45880|VDAC2_HUMAN Voltage-dependent anion-selective channel protein 2 OS=Homo sapiens OX=9606 GN=VDAC2 PE=1 SV=2	3.57345e-05	1	K	LTFDTTFSPNTGK(0.796)K(0.204)	3	-2.9131	7.19858e+07	1	-26.1012	60401000	1	25.8481
sp|P83916|CBX1_HUMAN	181	>sp|P83916|CBX1_HUMAN Chromobox protein homolog 1 OS=Homo sapiens OX=9606 GN=CBX1 PE=1 SV=1	7.80946e-54	2	K	LTWHSYPSEDDDK(0.036)K(0.966)DDK(0.998)	4	-0.23497	6.65266e+07	7.94162e+07	0.255502	49478000	1	25.5603
sp|P83916|CBX1_HUMAN	184	>sp|P83916|CBX1_HUMAN Chromobox protein homolog 1 OS=Homo sapiens OX=9606 GN=CBX1 PE=1 SV=1	7.80946e-54	2	K	LTWHSYPSEDDDK(0.036)K(0.966)DDK(0.998)	4	-0.23497	6.65266e+07	7.94162e+07	0.255502	49478000	1	25.5603
sp|P52569|CTR2_HUMAN	654	>sp|P52569|CTR2_HUMAN Cationic amino acid transporter 2 OS=Homo sapiens OX=9606 GN=SLC7A2 PE=1 SV=2	0.00149254	1	K	NLSSPFIFHEK(1)TSEF	3	1.7479	1	1	0	48987000	1	25.5459
sp|P37837|TALDO_HUMAN	204	>sp|P37837|TALDO_HUMAN Transaldolase OS=Homo sapiens OX=9606 GN=TALDO1 PE=1 SV=2	0.000159943	1	K	K(1)SYEPLEDPGVK	3	4.0365	1	3.0417e+07	24.8584	47926000	1	25.5143
sp|Q14152|EIF3A_HUMAN	351	>sp|Q14152|EIF3A_HUMAN Eukaryotic translation initiation factor 3 subunit A OS=Homo sapiens OX=9606 GN=EIF3A PE=1 SV=1	3.87384e-05	1	K	LLDMDGIIVEK(1)QR	3	-0.061905	3.08007e+07	1.82714e+07	-0.753378	47286000	1	25.4949
sp|Q92973|TNPO1_HUMAN	385	>sp|Q92973|TNPO1_HUMAN Transportin-1 OS=Homo sapiens OX=9606 GN=TNPO1 PE=1 SV=2	9.25882e-11	1	K	K(1)CSAAALDVLANVYR	3	0.62492	5.68554e+07	2.91708e+07	-0.96277	44023000	1	25.3918
sp|O75976|CBPD_HUMAN	1379	>sp|O75976|CBPD_HUMAN Carboxypeptidase D OS=Homo sapiens OX=9606 GN=CPD PE=1 SV=2	2.10276e-15	1	K	SLLSHEFQDETDTEEETLYSSK(1)H	3	-0.40246	1.6091e+07	1.68657e+07	0.067846	43092000	1	25.3609
sp|Q92887|MRP2_HUMAN	294	>sp|Q92887|MRP2_HUMAN Canalicular multispecific organic anion transporter 1 OS=Homo sapiens OX=9606 GN=ABCC2 PE=1 SV=3	1.60985e-06	1	K	NQSQSQDALVLEDVEK(0.846)K(0.154)	3	-1.0649	2.63719e+07	1.46122e+07	-0.851832	41932000	1	25.3215
sp|Q92508|PIEZ1_HUMAN	1903	>sp|Q92508|PIEZ1_HUMAN Piezo-type mechanosensitive ion channel component 1 OS=Homo sapiens OX=9606 GN=PIEZO1 PE=1 SV=4	3.10463e-106	1;2	K	K(1)GAAAIEAEDREEEEGEEEK(1)EAPTGR	4	0.70052	1.79743e+08	4.38551e+07	-2.03512	41222000	1	25.2969
sp|P12270|TPR_HUMAN	474	>sp|P12270|TPR_HUMAN Nucleoprotein TPR OS=Homo sapiens OX=9606 GN=TPR PE=1 SV=3	0.0012165	1	K	LQEDTDK(0.5)ANK(0.5)QSSVLER	4	-2.2229	1	1	0	40730000	1	25.2796
sp|Q86YT6|MIB1_HUMAN	791	>sp|Q86YT6|MIB1_HUMAN E3 ubiquitin-protein ligase MIB1 OS=Homo sapiens OX=9606 GN=MIB1 PE=1 SV=1	6.47835e-07	1	K	GQSPLDLCPDPNLCK(0.347)ALAK(0.653)	3	-1.8463	1	1	0	40078000	1	25.2563
sp|P20020|AT2B1_HUMAN	19	>sp|P20020|AT2B1_HUMAN Plasma membrane calcium-transporting ATPase 1 OS=Homo sapiens OX=9606 GN=ATP2B1 PE=1 SV=3	1.39321e-41	1	K	NSLK(1)EANHDGDFGITLAELR	4	-0.29114	4.1057e+07	2.1589e+07	-0.927332	39369000	1	25.2306
sp|Q13185|CBX3_HUMAN	21	>sp|Q13185|CBX3_HUMAN Chromobox protein homolog 3 OS=Homo sapiens OX=9606 GN=CBX3 PE=1 SV=4	5.95028e-05	1	K	K(1)VEEAEPEEFVVEK	3	1.6231	1	3.13267e+07	24.9009	39356000	1	25.2301
sp|P04920|B3A2_HUMAN	434	>sp|P04920|B3A2_HUMAN Anion exchange protein 2 OS=Homo sapiens OX=9606 GN=SLC4A2 PE=1 SV=4	0.00165089	1	K	HSHPSDEK(1)DFSFPR	4	0.088221	1	1	0	39112000	1	25.2211
sp|Q86YT6|MIB1_HUMAN	949	>sp|Q86YT6|MIB1_HUMAN E3 ubiquitin-protein ligase MIB1 OS=Homo sapiens OX=9606 GN=MIB1 PE=1 SV=1	5.33836e-54	1	K	DKDNTNVNADVQK(1)LQQQLQDIK	4	0.13012	1	1	0	38992000	1	25.2167
sp|P13591|NCAM1_HUMAN	820	>sp|P13591|NCAM1_HUMAN Neural cell adhesion molecule 1 OS=Homo sapiens OX=9606 GN=NCAM1 PE=1 SV=3	4.66905e-10	1	K	HTEPNETTPLTEPEK(0.868)GPVEAK(0.114)PECQETETK(0.017)PAPAEVK(0.001)	5	1.2031	1	1	0	38690000	1	25.2055
sp|Q13409|DC1I2_HUMAN	255	>sp|Q13409|DC1I2_HUMAN Cytoplasmic dynein 1 intermediate chain 2 OS=Homo sapiens OX=9606 GN=DYNC1I2 PE=1 SV=3	5.20581e-07	1	K	DLEDK(1)EGEIQAGAK	3	-1.8352	1	1	0	38599000	1	25.2021
sp|O75110|ATP9A_HUMAN	486	>sp|O75110|ATP9A_HUMAN Probable phospholipid-transporting ATPase IIA OS=Homo sapiens OX=9606 GN=ATP9A PE=1 SV=3	2.27011e-28	1	K	AIALCHNVTPVYESNGVTDQAEAEK(1)QYEDSCR	4	-0.43202	2.64462e+07	1.79884e+07	-0.55599	38124000	1	25.1842
sp|P61353|RL27_HUMAN	93	>sp|P61353|RL27_HUMAN 60S ribosomal protein L27 OS=Homo sapiens OX=9606 GN=RPL27 PE=1 SV=2	4.8488e-05	1	K	YSVDIPLDK(1)TVVNK	3	0.32329	5.63751e+07	4.08328e+07	-0.46533	38013000	1	25.18
sp|P08581|MET_HUMAN	1244	>sp|P08581|MET_HUMAN Hepatocyte growth factor receptor OS=Homo sapiens OX=9606 GN=MET PE=1 SV=4	9.67218e-05	1	K	DMYDKEYYSVHNK(0.373)TGAK(0.627)	4	-0.97304	1.35152e+07	1	-23.6881	36185000	1	25.1089
sp|Q9Y2Q0|AT8A1_HUMAN	1101	>sp|Q9Y2Q0|AT8A1_HUMAN Phospholipid-transporting ATPase IA OS=Homo sapiens OX=9606 GN=ATP8A1 PE=1 SV=1	0.000162428	1	K	SQDPGAVVLGK(1)SLTER	3	-0.085234	1	1	0	35359000	1	25.0756
sp|P55795|HNRH2_HUMAN	35	>sp|P55795|HNRH2_HUMAN Heterogeneous nuclear ribonucleoprotein H2 OS=Homo sapiens OX=9606 GN=HNRNPH2 PE=1 SV=1	0.000393465	1	K	FFSDCK(1)IQNGTSGIR	3	-0.43782	1	1.34545e+07	23.6816	34911000	1	25.0572
sp|A6NHR9|SMHD1_HUMAN	815	>sp|A6NHR9|SMHD1_HUMAN Structural maintenance of chromosomes flexible hinge domain-containing protein 1 OS=Homo sapiens OX=9606 GN=SMCHD1 PE=1 SV=2	3.29613e-06	1	K	LQVVLNESNADTYAGRPLPSK(0.202)AIK(0.798)	4	0.19499	1	4.84548e+07	25.5301	34780000	1	25.0518
sp|P57740|NU107_HUMAN	814	>sp|P57740|NU107_HUMAN Nuclear pore complex protein Nup107 OS=Homo sapiens OX=9606 GN=NUP107 PE=1 SV=1	7.40551e-05	1	K	GHLDALTADVK(0.996)EK(0.004)	3	-0.84986	1	2.03367e+07	24.2776	34780000	1	25.0518
sp|P06213|INSR_HUMAN	1047	>sp|P06213|INSR_HUMAN Insulin receptor OS=Homo sapiens OX=9606 GN=INSR PE=1 SV=4	0.0456807	1	K	DIIK(1)GEAETR	2	1.5403	1	1.41594e+07	23.7553	34360000	1	25.0342
sp|Q9BZG1|RAB34_HUMAN	252	>sp|Q9BZG1|RAB34_HUMAN Ras-related protein Rab-34 OS=Homo sapiens OX=9606 GN=RAB34 PE=1 SV=1	3.35926e-10	1	K	INSDDSNLYLTASK(0.963)K(0.037)	3	0.86848	7.19596e+07	4.92739e+07	-0.546363	33373000	1	24.9922
sp|P84098|RL19_HUMAN	181	>sp|P84098|RL19_HUMAN 60S ribosomal protein L19 OS=Homo sapiens OX=9606 GN=RPL19 PE=1 SV=1	0.0208692	2	K	LQAK(1)K(1)EEIIK	3	0.7314	1	1	0	32685000	1	24.9621
sp|P84098|RL19_HUMAN	180	>sp|P84098|RL19_HUMAN 60S ribosomal protein L19 OS=Homo sapiens OX=9606 GN=RPL19 PE=1 SV=1	0.0208692	2	K	LQAK(1)K(1)EEIIK	3	0.7314	1	1	0	32685000	1	24.9621
sp|O60784|TOM1_HUMAN	311	>sp|O60784|TOM1_HUMAN Target of Myb protein 1 OS=Homo sapiens OX=9606 GN=TOM1 PE=1 SV=2	1.55004e-82	1	K	TGQTTK(1)APSEAEPAADLIDMGPDPAATGNLSSQLAGMNLGSSSVR	4	1.04	6.20032e+06	1	-22.5639	32565000	1	24.9568
sp|P35613|BASI_HUMAN	264	>sp|P35613|BASI_HUMAN Basigin OS=Homo sapiens OX=9606 GN=BSG PE=1 SV=2	8.92236e-06	1	K	ITDSEDK(1)ALMNGSESR	3	1.1986	1	1	0	32495000	1	24.9537
sp|O75976|CBPD_HUMAN	1357	>sp|O75976|CBPD_HUMAN Carboxypeptidase D OS=Homo sapiens OX=9606 GN=CPD PE=1 SV=2	1.2703e-11	1	K	K(1)SLLSHEFQDETDTEEETLYSSKH	4	-0.33423	1	7.44851e+06	22.8285	32431000	1	24.9509
sp|Q68CP9|ARID2_HUMAN	1533	>sp|Q68CP9|ARID2_HUMAN AT-rich interactive domain-containing protein 2 OS=Homo sapiens OX=9606 GN=ARID2 PE=1 SV=2	0.000254224	1	K	RPAEDTDRETVAGIPNK(1)VGVR	4	1.1663	1	1	0	32394000	1	24.9492
sp|Q9UMX9|S45A2_HUMAN	176	>sp|Q9UMX9|S45A2_HUMAN Membrane-associated transporter protein OS=Homo sapiens OX=9606 GN=SLC45A2 PE=1 SV=2	9.81304e-05	1	K	AYLFDVCSHQDK(0.793)EK(0.207)	4	-0.31206	1	1	0	32246000	1	24.9426
sp|Q9BSJ8|ESYT1_HUMAN	118	>sp|Q9BSJ8|ESYT1_HUMAN Extended synaptotagmin-1 OS=Homo sapiens OX=9606 GN=ESYT1 PE=1 SV=1	4.77892e-05	1	K	QLLDDEEQLTAK(1)TLYMSHR	4	-1.3311	1.03226e+08	1.55928e+07	-2.72685	32040000	1	24.9334
sp|Q9Y624|JAM1_HUMAN	292	>sp|Q9Y624|JAM1_HUMAN Junctional adhesion molecule A OS=Homo sapiens OX=9606 GN=F11R PE=1 SV=1	0.0137296	1	K	SEGEFK(1)QTSSFLV	2	-2.339	2.84648e+07	2.57565e+07	-0.144241	31642000	1	24.9153
sp|P12270|TPR_HUMAN	494	>sp|P12270|TPR_HUMAN Nucleoprotein TPR OS=Homo sapiens OX=9606 GN=TPR PE=1 SV=3	3.07712e-05	1	K	MEIQVK(1)DLSQQIR	3	-1.9174	8.96704e+06	1.06628e+07	0.249879	31372000	1	24.903
sp|P09496|CLCA_HUMAN	223	>sp|P09496|CLCA_HUMAN Clathrin light chain A OS=Homo sapiens OX=9606 GN=CLTA PE=1 SV=1	0.0058317	1	K	LCDFNPK(0.924)SSK(0.076)	2	0.50346	1.27377e+07	3.06712e+06	-2.05415	29752000	1	24.8265
sp|O95140|MFN2_HUMAN	171	>sp|O95140|MFN2_HUMAN Mitofusin-2 OS=Homo sapiens OX=9606 GN=MFN2 PE=1 SV=3	2.09683e-06	1	K	TVNQLAHALHQDK(1)QLHAGSLVSVMWPNSK	5	-0.065664	1	1	0	29675000	1	24.8227
sp|O60488|ACSL4_HUMAN	621	>sp|O60488|ACSL4_HUMAN Long-chain-fatty-acid--CoA ligase 4 OS=Homo sapiens OX=9606 GN=ACSL4 PE=1 SV=2	1.93098e-17	1	K	SDQSYVISFVVPNQK(1)R	3	0.11545	8.79414e+07	7.39819e+07	-0.249371	29608000	1	24.8195
sp|P61106|RAB14_HUMAN	193	>sp|P61106|RAB14_HUMAN Ras-related protein Rab-14 OS=Homo sapiens OX=9606 GN=RAB14 PE=1 SV=4	1.38529e-17	1	K	IYQNIQDGSLDLNAAESGVQHK(1)PSAPQGGR	4	-1.9011	4.68306e+07	2.63791e+07	-0.828055	29259000	1	24.8024
sp|Q9UPI3|FLVC2_HUMAN	516	>sp|Q9UPI3|FLVC2_HUMAN Feline leukemia virus subgroup C receptor-related protein 2 OS=Homo sapiens OX=9606 GN=FLVCR2 PE=1 SV=1	4.54289e-10	1	K	LQEEEEESNTSK(1)VPTAVSEDHL	3	-1.2849	1	7.49883e+06	22.8382	29066000	1	24.7928
sp|Q12913|PTPRJ_HUMAN	1032	>sp|Q12913|PTPRJ_HUMAN Receptor-type tyrosine-protein phosphatase eta OS=Homo sapiens OX=9606 GN=PTPRJ PE=1 SV=3	0.00287332	1	K	VENFEAYFK(0.236)K(0.764)	2	-1.4056	1.39825e+07	1	-23.7371	29013000	1	24.7902
sp|P19634|SL9A1_HUMAN	612	>sp|P19634|SL9A1_HUMAN Sodium/hydrogen exchanger 1 OS=Homo sapiens OX=9606 GN=SLC9A1 PE=1 SV=2	7.42441e-05	1	K	IPSAVSTVSMQNIHPK(1)SLPSER	3	-0.40887	1	1	0	28959000	1	24.7875
sp|Q8TAF3|WDR48_HUMAN	358	>sp|Q8TAF3|WDR48_HUMAN WD repeat-containing protein 48 OS=Homo sapiens OX=9606 GN=WDR48 PE=1 SV=1	1.95088e-12	1	K	ASGDYDNDCTNPITPLCTQPDQVIK(0.991)GGASIIQCHILNDK(0.009)R	5	1.0165	1	7.17849e+06	22.7752	28554000	1	24.7672
sp|Q02241|KIF23_HUMAN	503	>sp|Q02241|KIF23_HUMAN Kinesin-like protein KIF23 OS=Homo sapiens OX=9606 GN=KIF23 PE=1 SV=3	0.0156158	1	K	LIEALEK(1)R	2	0.97975	1	1	0	28381000	1	24.7584
sp|O15400|STX7_HUMAN	68	>sp|O15400|STX7_HUMAN Syntaxin-7 OS=Homo sapiens OX=9606 GN=STX7 PE=1 SV=4	8.08653e-09	1	K	ETDK(0.95)YIK(0.05)EFGSLPTTPSEQR	3	1.4582	2.80544e+06	1	-21.4198	27932000	1	24.7354
sp|Q6NUK4|REEP3_HUMAN	111	>sp|Q6NUK4|REEP3_HUMAN Receptor expression-enhancing protein 3 OS=Homo sapiens OX=9606 GN=REEP3 PE=1 SV=1	9.30472e-12	1	K	EIDDYIVQAK(1)ER	2	0.23871	9.64031e+07	8.02023e+07	-0.265435	27573000	1	24.7168
sp|P25116|PAR1_HUMAN	421	>sp|P25116|PAR1_HUMAN Proteinase-activated receptor 1 OS=Homo sapiens OX=9606 GN=F2R PE=1 SV=2	1.92337e-31	1	K	MDTCSSNLNNSIYK(0.986)K(0.014)	2	-0.31578	1.76468e+08	1.15765e+08	-0.6082	27406000	1	24.708
sp|P21281|VATB2_HUMAN	108	>sp|P21281|VATB2_HUMAN V-type proton ATPase subunit B, brain isoform OS=Homo sapiens OX=9606 GN=ATP6V1B2 PE=1 SV=3	7.79493e-05	1	K	AVVQVFEGTSGIDAK(0.798)K(0.202)	3	0.9951	1	1	0	27040000	1	24.6886
sp|P21796|VDAC1_HUMAN	53	>sp|P21796|VDAC1_HUMAN Voltage-dependent anion-selective channel protein 1 OS=Homo sapiens OX=9606 GN=VDAC1 PE=1 SV=2	9.74929e-38	1	K	TKSENGLEFTSSGSANTETTK(1)VTGSLETK	4	0.4282	1	1	0	26914000	1	24.6819
sp|P53990|IST1_HUMAN	48	>sp|P53990|IST1_HUMAN IST1 homolog OS=Homo sapiens OX=9606 GN=IST1 PE=1 SV=1	0.00032521	1	K	EIADYLAAGK(1)DER	3	0.73356	2.10073e+07	1.78732e+07	-0.233097	25145000	1	24.5838
sp|P41250|GARS_HUMAN	733	>sp|P41250|GARS_HUMAN Glycine--tRNA ligase OS=Homo sapiens OX=9606 GN=GARS PE=1 SV=3	0.00124895	1	K	YPLFEGQETGK(0.5)K(0.5)ETIEE	3	-0.90347	8.57321e+06	1	-23.0314	25124000	1	24.5826
sp|O43491|E41L2_HUMAN	114	>sp|O43491|E41L2_HUMAN Band 4.1-like protein 2 OS=Homo sapiens OX=9606 GN=EPB41L2 PE=1 SV=1	8.21997e-17	1	K	DGGDKKEPTQAVVEEQVLDK(1)EEPLPEEQR	4	0.45872	1	1	0	24865000	1	24.5676
sp|Q14980|NUMA1_HUMAN	1024	>sp|Q14980|NUMA1_HUMAN Nuclear mitotic apparatus protein 1 OS=Homo sapiens OX=9606 GN=NUMA1 PE=1 SV=2	0.0117183	1	K	AQADLALEK(1)AAR	3	-0.15144	1	1	0	24685000	1	24.5571
sp|P24530|EDNRB_HUMAN	411	>sp|P24530|EDNRB_HUMAN Endothelin receptor type B OS=Homo sapiens OX=9606 GN=EDNRB PE=1 SV=1	4.45597e-54	1	K	SCLCCWCQSFEEK(1)QSLEEK	3	-0.40679	1	1	0	24500000	1	24.5463
sp|Q5VVJ2|MYSM1_HUMAN	79	>sp|Q5VVJ2|MYSM1_HUMAN Histone H2A deubiquitinase MYSM1 OS=Homo sapiens OX=9606 GN=MYSM1 PE=1 SV=1	0.000443993	1	K	MLLEEEYYLSK(0.438)K(0.562)	3	-2.1184	1	2.32015e+07	24.4677	24106000	1	24.5229
sp|Q9H040|SPRTN_HUMAN	423	>sp|Q9H040|SPRTN_HUMAN SprT-like domain-containing protein Spartan OS=Homo sapiens OX=9606 GN=SPRTN PE=1 SV=2	0.00261467	1	K	TVFDNFFIK(0.619)K(0.381)	3	-0.63649	1	1	0	23835000	1	24.5066
sp|Q9H3H9|TCAL2_HUMAN	154	>sp|Q9H3H9|TCAL2_HUMAN Transcription elongation factor A protein-like 2 OS=Homo sapiens OX=9606 GN=TCEAL2 PE=2 SV=1	0.00156187		K	QYK(1)EAIHDMNFSNEDMIR	3	-0.99528	1	1	0	23803000	1	24.5046
sp|P48643|TCPE_HUMAN	265	>sp|P48643|TCPE_HUMAN T-complex protein 1 subunit epsilon OS=Homo sapiens OX=9606 GN=CCT5 PE=1 SV=1	0.00036472	1	K	HK(1)LDVTSVEDYK	3	0.52254	3.32822e+07	2.61661e+07	-0.347052	23783000	1	24.5034
sp|O95164|UBL3_HUMAN	22	>sp|O95164|UBL3_HUMAN Ubiquitin-like protein 3 OS=Homo sapiens OX=9606 GN=UBL3 PE=1 SV=1	0.000325037	1	K	TK(1)EFLFSPNDSASDIAK	3	-0.61316	1	1	0	23602000	1	24.4924
sp|Q13247|SRSF6_HUMAN	165	>sp|Q13247|SRSF6_HUMAN Serine/arginine-rich splicing factor 6 OS=Homo sapiens OX=9606 GN=SRSF6 PE=1 SV=2	2.32253e-05	1	K	ALDK(1)LDGTEINGR	3	0.83494	2.35281e+07	2.67362e+07	0.184409	23550000	1	24.4892
sp|Q15004|PAF15_HUMAN	24	>sp|Q15004|PAF15_HUMAN PCNA-associated factor OS=Homo sapiens OX=9606 GN=PCLAF PE=1 SV=1	1.52093e-06	1	K	K(1)VLGSSTSATNSTSVSSR	3	0.2262	1	4.13926e+07	25.3029	23043000	1	24.4578
sp|P61923|COPZ1_HUMAN	39	>sp|P61923|COPZ1_HUMAN Coatomer subunit zeta-1 OS=Homo sapiens OX=9606 GN=COPZ1 PE=1 SV=1	0.00299663	1	K	YYDDTYPSVK(0.985)EQK(0.015)	3	-0.69384	1	1.30944e+07	23.6424	22840000	1	24.4451
sp|Q96RL1|UIMC1_HUMAN	587	>sp|Q96RL1|UIMC1_HUMAN BRCA1-A complex subunit RAP80 OS=Homo sapiens OX=9606 GN=UIMC1 PE=1 SV=2	2.1212e-55	1	K	EYQCHVDSCLQLAK(1)ADQGDGPEGSGR	4	-0.13929	7.68963e+06	1.78248e+07	1.2129	22123000	1	24.399
sp|Q96S66|CLCC1_HUMAN	414	>sp|Q96S66|CLCC1_HUMAN Chloride channel CLIC-like protein 1 OS=Homo sapiens OX=9606 GN=CLCC1 PE=1 SV=1	9.04723e-15	1	K	GQMGPTEQGPYAK(1)TYEGR	3	0.36017	4.03278e+07	3.06496e+07	-0.395909	21929000	1	24.3863
sp|P30050|RL12_HUMAN	48	>sp|P30050|RL12_HUMAN 60S ribosomal protein L12 OS=Homo sapiens OX=9606 GN=RPL12 PE=1 SV=1	0.0105488	1	K	K(0.003)VGDDIAK(0.997)ATGDWK(0.001)	3	-3.8953	1	1	0	21767000	1	24.3756
sp|Q9ULT8|HECD1_HUMAN	1754	>sp|Q9ULT8|HECD1_HUMAN E3 ubiquitin-protein ligase HECTD1 OS=Homo sapiens OX=9606 GN=HECTD1 PE=1 SV=3	2.94362e-23	1	K	SDVTHHAVTSQLPQVPAGAGSRPIGEQEEEEYETK(1)GGR	5	-1.187	3.14018e+07	3.28825e+07	0.066474	21581000	1	24.3633
sp|O95714|HERC2_HUMAN	990	>sp|O95714|HERC2_HUMAN E3 ubiquitin-protein ligase HERC2 OS=Homo sapiens OX=9606 GN=HERC2 PE=1 SV=2	9.67252e-06	1	K	TPLDK(1)DLINTGICESSGK	3	-0.43062	1	1	0	21581000	1	24.3633
sp|P20700|LMNB1_HUMAN	261	>sp|P20700|LMNB1_HUMAN Lamin-B1 OS=Homo sapiens OX=9606 GN=LMNB1 PE=1 SV=2	0.0011549	1	K	LYK(1)EELEQTYHAK	3	1.2506	1	1.854e+07	24.1441	21571000	1	24.3626
sp|P61088|UBE2N_HUMAN;sp|Q5JXB2|UE2NL_HUMAN	24;24	>sp|P61088|UBE2N_HUMAN Ubiquitin-conjugating enzyme E2 N OS=Homo sapiens OX=9606 GN=UBE2N PE=1 SV=1;>sp|Q5JXB2|UE2NL_HUMAN Putative ubiquitin-conjugating enzyme E2 N-like OS=Homo sapiens OX=9606 GN=UBE2NL PE=1 SV=1	7.39451e-05	1	K	LLAEPVPGIK(1)AEPDESNAR	3	1.1068	4.79061e+07	4.57413e+07	-0.0667134	21450000	1	24.3545
sp|Q9H040|SPRTN_HUMAN	407	>sp|Q9H040|SPRTN_HUMAN SprT-like domain-containing protein Spartan OS=Homo sapiens OX=9606 GN=SPRTN PE=1 SV=2	4.73885e-13	1	K	VTESASVMPSQDVSGSEDTFPNK(1)RPR	4	-0.15286	1	1	0	21330000	1	24.3464
sp|Q712K3|UB2R2_HUMAN	182	>sp|Q712K3|UB2R2_HUMAN Ubiquitin-conjugating enzyme E2 R2 OS=Homo sapiens OX=9606 GN=UBE2R2 PE=1 SV=1	0.000227878	1	K	AEAEK(0.26)DGVK(0.74)VPTTLAEYCIK	4	0.37496	1	1	0	21329000	1	24.3463
sp|O95071|UBR5_HUMAN	91	>sp|O95071|UBR5_HUMAN E3 ubiquitin-protein ligase UBR5 OS=Homo sapiens OX=9606 GN=UBR5 PE=1 SV=2	2.34843e-05	1	K	IGFSVQPDRLELGK(0.116)PDNNDGSK(0.884)LNSNSGAGR	5	-0.21242	1	1	0	21265000	1	24.342
sp|Q86US8|EST1A_HUMAN	816	>sp|Q86US8|EST1A_HUMAN Telomerase-binding protein EST1A OS=Homo sapiens OX=9606 GN=SMG6 PE=1 SV=2	0.0472082	2	K	RK(1)AEQMEK(0.875)K(0.125)	2	-3.8162	1	1	0	21261000	1	24.3417
sp|Q86US8|EST1A_HUMAN	822	>sp|Q86US8|EST1A_HUMAN Telomerase-binding protein EST1A OS=Homo sapiens OX=9606 GN=SMG6 PE=1 SV=2	0.0472082	2	K	RK(1)AEQMEK(0.875)K(0.125)	2	-3.8162	1	1	0	21261000	1	24.3417
sp|Q9UGL1|KDM5B_HUMAN	293	>sp|Q9UGL1|KDM5B_HUMAN Lysine-specific demethylase 5B OS=Homo sapiens OX=9606 GN=KDM5B PE=1 SV=3	0.00573275	1	K	DYIVENEK(0.924)EK(0.072)PK(0.004)	3	3.9335	1	1	0	21246000	1	24.3407
sp|Q6PJT7|ZC3HE_HUMAN	418	>sp|Q6PJT7|ZC3HE_HUMAN Zinc finger CCCH domain-containing protein 14 OS=Homo sapiens OX=9606 GN=ZC3H14 PE=1 SV=1	0.000135146	1	K	ISPPIK(0.013)EEETK(0.986)GDSVEK(0.001)	3	-0.45052	1.18965e+07	3.46751e+07	1.54337	21182000	1	24.3363
sp|P55854|SUMO3_HUMAN;sp|P61956|SUMO2_HUMAN;sp|Q6EEV6|SUMO4_HUMAN	34;35;35	>sp|P55854|SUMO3_HUMAN Small ubiquitin-related modifier 3 OS=Homo sapiens OX=9606 GN=SUMO3 PE=1 SV=2;>sp|P61956|SUMO2_HUMAN Small ubiquitin-related modifier 2 OS=Homo sapiens OX=9606 GN=SUMO2 PE=1 SV=3;>sp|Q6EEV6|SUMO4_HUMAN Small ubiquitin-related modifie	0.00136559	1	K	VAGQDGSVVQFK(0.4)IK(0.6)	2	-0.32761	1	1	0	21177000	1	24.336
sp|Q14137|BOP1_HUMAN	253	>sp|Q14137|BOP1_HUMAN Ribosome biogenesis protein BOP1 OS=Homo sapiens OX=9606 GN=BOP1 PE=1 SV=2	0.00281182	1	K	SFIPSLVEK(0.806)EK(0.194)	3	3.8046	1	5.0873e+06	22.2785	21067000	1	24.3285
sp|O95208|EPN2_HUMAN	135	>sp|O95208|EPN2_HUMAN Epsin-2 OS=Homo sapiens OX=9606 GN=EPN2 PE=1 SV=3	1.14805e-07	1	K	QLVALLK(1)DEER	3	-0.11704	1.73775e+08	1.96894e+08	0.180195	21063000	1	24.3282
sp|P04920|B3A2_HUMAN	1214	>sp|P04920|B3A2_HUMAN Anion exchange protein 2 OS=Homo sapiens OX=9606 GN=SLC4A2 PE=1 SV=4	0.00113717	1	K	EMK(1)CLDANEAEPVFDER	3	-0.48432	1	1.45494e+06	20.4725	20902000	1	24.3171
sp|Q8TCZ2|C99L2_HUMAN	242	>sp|Q8TCZ2|C99L2_HUMAN CD99 antigen-like protein 2 OS=Homo sapiens OX=9606 GN=CD99L2 PE=1 SV=1	6.67208e-14	1	K	GENLEAVVCEEPQVK(1)YSTLHTQSAEPPPPPEPARI	4	0.55932	1.25732e+07	7.9412e+06	-0.662927	20442000	1	24.285
sp|Q9UNF1|MAGD2_HUMAN;sp|Q12816|TROP_HUMAN	422;586	>sp|Q9UNF1|MAGD2_HUMAN Melanoma-associated antigen D2 OS=Homo sapiens OX=9606 GN=MAGED2 PE=1 SV=2;>sp|Q12816|TROP_HUMAN Trophinin OS=Homo sapiens OX=9606 GN=TRO PE=1 SV=3	0.00968449	1	K	LITDEFVK(0.978)QK(0.022)	3	-1.7108	5.62354e+06	9.32432e+06	0.72952	20363000	1	24.2794
sp|Q96QD8|S38A2_HUMAN	38	>sp|Q96QD8|S38A2_HUMAN Sodium-coupled neutral amino acid transporter 2 OS=Homo sapiens OX=9606 GN=SLC38A2 PE=1 SV=2	7.12051e-08	1	K	QAALK(1)SHYADVDPENQNFLLESNLGK	3	0.9085	3.96249e+06	1	-21.918	20348000	1	24.2784
sp|P40429|RL13A_HUMAN;sp|Q6NVV1|R13P3_HUMAN	159;73	>sp|P40429|RL13A_HUMAN 60S ribosomal protein L13a OS=Homo sapiens OX=9606 GN=RPL13A PE=1 SV=2;>sp|Q6NVV1|R13P3_HUMAN Putative 60S ribosomal protein L13a protein RPL13AP3 OS=Homo sapiens OX=9606 GN=RPL13AP3 PE=5 SV=1	0.00571563	1	K	YQAVTATLEEK(1)R	3	2.6213	5.86557e+06	1	-22.4838	20302000	1	24.2751
sp|P49773|HINT1_HUMAN	92	>sp|P49773|HINT1_HUMAN Histidine triad nucleotide-binding protein 1 OS=Homo sapiens OX=9606 GN=HINT1 PE=1 SV=2	0.00459724		K	CAADLGLNK(1)GYR	3	0.48043	1	1	0	20204000	1	24.2681
sp|Q04760|LGUL_HUMAN	140	>sp|Q04760|LGUL_HUMAN Lactoylglutathione lyase OS=Homo sapiens OX=9606 GN=GLO1 PE=1 SV=4	0.000161063	1	K	GFGHIGIAVPDVYSACK(1)R	4	-0.35131	1	1	0	20169000	1	24.2656
sp|P20962|PTMS_HUMAN	15	>sp|P20962|PTMS_HUMAN Parathymosin OS=Homo sapiens OX=9606 GN=PTMS PE=1 SV=2	0.000599686	1	K	SVEAAAELSAK(0.897)DLK(0.103)	3	-0.75172	2.2243e+07	3.03625e+07	0.44894	19986000	1	24.2525
sp|P00558|PGK1_HUMAN	264	>sp|P00558|PGK1_HUMAN Phosphoglycerate kinase 1 OS=Homo sapiens OX=9606 GN=PGK1 PE=1 SV=3	1.86455e-05	1	K	VLNNMEIGTSLFDEEGAK(0.782)IVK(0.218)	3	0.9707	3.62731e+06	1	-21.7905	19951000	1	24.25
sp|O00567|NOP56_HUMAN	396	>sp|O00567|NOP56_HUMAN Nucleolar protein 56 OS=Homo sapiens OX=9606 GN=NOP56 PE=1 SV=4	1.68137e-05	1	K	IDCFSEVPTSVFGEK(1)LR	3	1.464	1.95446e+07	3.33106e+06	-2.55272	19844000	1	24.2422
sp|P28070|PSB4_HUMAN	201	>sp|P28070|PSB4_HUMAN Proteasome subunit beta type-4 OS=Homo sapiens OX=9606 GN=PSMB4 PE=1 SV=4	0.000247806	1	K	EVLEK(1)QPVLSQTEAR	3	-0.38917	2.18514e+07	2.27682e+07	0.059294	19841000	1	24.242
sp|P33527|MRP1_HUMAN	1181	>sp|P33527|MRP1_HUMAN Multidrug resistance-associated protein 1 OS=Homo sapiens OX=9606 GN=ABCC1 PE=1 SV=3	0.000826827	1	K	FIHQSDLK(0.999)VDENQK(0.001)	3	0.64649	9.07547e+06	1.23957e+07	0.44979	19820000	1	24.2405
sp|Q9UHV9|PFD2_HUMAN	18	>sp|Q9UHV9|PFD2_HUMAN Prefoldin subunit 2 OS=Homo sapiens OX=9606 GN=PFDN2 PE=1 SV=1	0.000812729	1	K	SSGSGAGK(1)GAVSAEQVIAGFNR	3	-0.036346	1	1	0	19760000	1	24.2361
sp|Q6PI97|CK088_HUMAN	134	>sp|Q6PI97|CK088_HUMAN UPF0722 protein C11orf88 OS=Homo sapiens OX=9606 GN=C11orf88 PE=2 SV=2	0.0179063	1	K	EERISK(1)ELISLPYK	3	-0.36404	1.66717e+07	1.66651e+07	-0.00056928	19661000	1	24.2288
sp|Q8TB36|GDAP1_HUMAN	172	>sp|Q8TB36|GDAP1_HUMAN Ganglioside-induced differentiation-associated protein 1 OS=Homo sapiens OX=9606 GN=GDAP1 PE=1 SV=3	0.00316598	1	K	SQIGNTESELK(0.94)K(0.06)	3	0.56488	1	1	0	19609000	1	24.225
sp|P27816|MAP4_HUMAN	933	>sp|P27816|MAP4_HUMAN Microtubule-associated protein 4 OS=Homo sapiens OX=9606 GN=MAP4 PE=1 SV=3	0.00701018	1	K	LATNTSAPDLK(1)NVR	3	-0.78554	1	1	0	19557000	1	24.2212
sp|A6NFY4|NEMP2_HUMAN	332	>sp|A6NFY4|NEMP2_HUMAN Nuclear envelope integral membrane protein 2 OS=Homo sapiens OX=9606 GN=NEMP2 PE=2 SV=3	0.00219131	1	K	ELVVK(1)YLTEDEYR	3	1.1786	6.8276e+06	7.7356e+06	0.180136	19544000	1	24.2202
sp|P07195|LDHB_HUMAN	82	>sp|P07195|LDHB_HUMAN L-lactate dehydrogenase B chain OS=Homo sapiens OX=9606 GN=LDHB PE=1 SV=2	0.00283886	1	K	IVADK(1)DYSVTANSK	3	0.16728	1	1	0	19396000	1	24.2093
sp|Q9HCM4|E41L5_HUMAN	508	>sp|Q9HCM4|E41L5_HUMAN Band 4.1-like protein 5 OS=Homo sapiens OX=9606 GN=EPB41L5 PE=1 SV=3	4.92542e-10	1	K	LPGLGEPEVEYETLK(0.024)DTSEK(0.718)LK(0.258)	4	0.10188	1	1	0	19366000	1	24.207
sp|P09651|ROA1_HUMAN	8	>sp|P09651|ROA1_HUMAN Heterogeneous nuclear ribonucleoprotein A1 OS=Homo sapiens OX=9606 GN=HNRNPA1 PE=1 SV=5	0.000548499	1	K	SESPK(1)EPEQLR	3	-0.37606	1	1.04662e+07	23.3192	19333000	1	24.2046
sp|Q7Z6Z7|HUWE1_HUMAN	3244	>sp|Q7Z6Z7|HUWE1_HUMAN E3 ubiquitin-protein ligase HUWE1 OS=Homo sapiens OX=9606 GN=HUWE1 PE=1 SV=3	6.53061e-05	1	K	SSESELCIETPK(0.999)LTTSEEK(0.001)	3	1.7341	1.12423e+07	1.1133e+07	-0.0140866	19146000	1	24.1905
sp|Q9H3E2|SNX25_HUMAN	75	>sp|Q9H3E2|SNX25_HUMAN Sorting nexin-25 OS=Homo sapiens OX=9606 GN=SNX25 PE=1 SV=2	0.00234598	1	K	TLLTHFCDLK(1)AANAR	3	1.1238	1.06614e+07	1	-23.3459	19054000	1	24.1836
sp|P20700|LMNB1_HUMAN	145	>sp|P20700|LMNB1_HUMAN Lamin-B1 OS=Homo sapiens OX=9606 GN=LMNB1 PE=1 SV=2	4.15571e-10	1	K	EYEAALNSK(1)DAALATALGDKK	3	-0.51049	1.19281e+07	8.35693e+06	-0.513315	19048000	1	24.1831
sp|Q9UGL1|KDM5B_HUMAN	832	>sp|Q9UGL1|KDM5B_HUMAN Lysine-specific demethylase 5B OS=Homo sapiens OX=9606 GN=KDM5B PE=1 SV=3	0.00223197	1	K	SGGGK(1)SQNQLTVNELR	3	-0.89093	1	1	0	18895000	1	24.1715
sp|O14980|XPO1_HUMAN	693	>sp|O14980|XPO1_HUMAN Exportin-1 OS=Homo sapiens OX=9606 GN=XPO1 PE=1 SV=1	0.00557746	1	K	QLGSILK(1)TNVR	3	-0.10243	1	1	0	18715000	1	24.1577
sp|P13489|RINI_HUMAN	452	>sp|P13489|RINI_HUMAN Ribonuclease inhibitor OS=Homo sapiens OX=9606 GN=RNH1 PE=1 SV=2	0.00072425	1	K	LQALEK(0.838)DK(0.162)PSLR	3	1.3282	2.50184e+07	3.22754e+07	0.367446	18646000	1	24.1524
sp|P23246|SFPQ_HUMAN	421	>sp|P23246|SFPQ_HUMAN Splicing factor, proline- and glutamine-rich OS=Homo sapiens OX=9606 GN=SFPQ PE=1 SV=2	0.00901448	1	K	GIVEFASK(1)PAAR	3	0.55937	1	1	0	18564000	1	24.146
sp|Q7KZI7|MARK2_HUMAN	716	>sp|Q7KZI7|MARK2_HUMAN Serine/threonine-protein kinase MARK2 OS=Homo sapiens OX=9606 GN=MARK2 PE=1 SV=2	0.00191275	1	K	K(1)VLDANSCQSELHEK	3	0.58497	9.08435e+06	6.40651e+06	-0.503843	18520000	1	24.1426
sp|P48960|CD97_HUMAN	731	>sp|P48960|CD97_HUMAN CD97 antigen OS=Homo sapiens OX=9606 GN=CD97 PE=1 SV=4	0.00300415	1	K	FSEINPDMK(0.415)K(0.585)	2	1.0006	1.24369e+06	1	-20.2462	18247000	1	24.1212
sp|P46379|BAG6_HUMAN	80	>sp|P46379|BAG6_HUMAN Large proline-rich protein BAG6 OS=Homo sapiens OX=9606 GN=BAG6 PE=1 SV=2	0.00128411	1	K	LQEYNVGGK(1)VIHLVER	4	-0.23335	1	1	0	18129000	1	24.1118
sp|Q6IA86|ELP2_HUMAN	459	>sp|Q6IA86|ELP2_HUMAN Elongator complex protein 2 OS=Homo sapiens OX=9606 GN=ELP2 PE=1 SV=2	0.00122549	1	K	FQFVSGADEK(1)VLR	3	-0.057893	1	9.00028e+06	23.1015	18113000	1	24.1105
sp|Q9Y487|VPP2_HUMAN	92	>sp|Q9Y487|VPP2_HUMAN V-type proton ATPase 116 kDa subunit a isoform 2 OS=Homo sapiens OX=9606 GN=ATP6V0A2 PE=1 SV=2	3.0873e-17	1	K	ADIPLPEGEASPPAPPLK(1)QVLEMQEQLQK	3	0.74261	2.46065e+06	1	-21.2306	18070000	1	24.1071
sp|Q562E7|WDR81_HUMAN	411	>sp|Q562E7|WDR81_HUMAN WD repeat-containing protein 81 OS=Homo sapiens OX=9606 GN=WDR81 PE=1 SV=2	0.00580216		K	LNK(0.266)GDK(0.734)QLDFTYEMTR	3	1.2762	1	5.29928e+06	22.3374	18050000	1	24.1055
sp|O43396|TXNL1_HUMAN	5	>sp|O43396|TXNL1_HUMAN Thioredoxin-like protein 1 OS=Homo sapiens OX=9606 GN=TXNL1 PE=1 SV=3	0.000233988	1	K	VGVK(1)PVGSDPDFQPELSGAGSR	3	-0.058975	1.30758e+07	1.15416e+07	-0.18006	18041000	1	24.1048
sp|O60716|CTND1_HUMAN	898	>sp|O60716|CTND1_HUMAN Catenin delta-1 OS=Homo sapiens OX=9606 GN=CTNND1 PE=1 SV=1	3.22879e-17	1	K	SDKKPDREEIQMSNMGSNTK(1)SLDNNYSTPNER	5	0.56981	3.41482e+07	2.93767e+07	-0.217138	17803000	1	24.0856
sp|P61247|RS3A_HUMAN	195	>sp|P61247|RS3A_HUMAN 40S ribosomal protein S3a OS=Homo sapiens OX=9606 GN=RPS3A PE=1 SV=2	0.0100818	1	K	LIPDSIGK(0.993)DIEK(0.007)	3	2.8206	1	1.47501e+07	23.8142	17790000	1	24.0846
sp|P0C7U0|ELFN1_HUMAN	510	>sp|P0C7U0|ELFN1_HUMAN Protein ELFN1 OS=Homo sapiens OX=9606 GN=ELFN1 PE=1 SV=2	9.10054e-08	1	K	IPYLPAAGEVEQYK(1)LVESADTPK	3	2.1083	1	1	0	17774000	1	24.0833
sp|P14866|HNRPL_HUMAN	277	>sp|P14866|HNRPL_HUMAN Heterogeneous nuclear ribonucleoprotein L OS=Homo sapiens OX=9606 GN=HNRNPL PE=1 SV=2	7.09719e-11	1	K	LNVFK(1)NDQDTWDYTNPNLSGQGDPGSNPNKR	4	-0.90786	1	1	0	17706000	1	24.0777
sp|P61803|DAD1_HUMAN	82	>sp|P61803|DAD1_HUMAN Dolichyl-diphosphooligosaccharide--protein glycosyltransferase subunit DAD1 OS=Homo sapiens OX=9606 GN=DAD1 PE=1 SV=3	1.99167e-05	1	K	IQINPQNK(1)ADFQGISPER	3	-0.056622	1	9.98022e+06	23.2506	17671000	1	24.0749
sp|P00441|SODC_HUMAN	24	>sp|P00441|SODC_HUMAN Superoxide dismutase [Cu-Zn] OS=Homo sapiens OX=9606 GN=SOD1 PE=1 SV=2	3.07058e-16	1	K	GDGPVQGIINFEQK(0.997)ESNGPVK(0.003)	3	1.5607	1.16402e+07	1.30378e+07	0.163583	17478000	1	24.059
sp|Q9H1A4|APC1_HUMAN	905	>sp|Q9H1A4|APC1_HUMAN Anaphase-promoting complex subunit 1 OS=Homo sapiens OX=9606 GN=ANAPC1 PE=1 SV=1	0.000625164	1	K	ITIAPQK(1)LQVEQEENR	3	-3.9197	1.34351e+07	1.28495e+07	-0.0643035	17402000	1	24.0527
sp|Q13200|PSMD2_HUMAN	858	>sp|Q13200|PSMD2_HUMAN 26S proteasome non-ATPase regulatory subunit 2 OS=Homo sapiens OX=9606 GN=PSMD2 PE=1 SV=3	0.00209805	1	K	VGQAVDVVGQAGK(0.969)PK(0.031)	3	-0.23874	1.90643e+07	1	-24.1844	17349000	1	24.0483
sp|Q01469|FABP5_HUMAN	72	>sp|Q01469|FABP5_HUMAN Fatty acid-binding protein, epidermal OS=Homo sapiens OX=9606 GN=FABP5 PE=1 SV=3	4.49208e-05	1	K	TTQFSCTLGEK(1)FEETTADGRK	4	-0.42882	1	1	0	17342000	1	24.0478
sp|Q92508|PIEZ1_HUMAN	1884	>sp|Q92508|PIEZ1_HUMAN Piezo-type mechanosensitive ion channel component 1 OS=Homo sapiens OX=9606 GN=PIEZO1 PE=1 SV=4	1.25115e-17	1;2	K	K(1)GAAAIEAEDREEEEGEEEK(1)EAPTGR	4	0.70052	4.03657e+07	1	-25.2666	17294000	1	24.0438
sp|Q04760|LGUL_HUMAN	96	>sp|Q04760|LGUL_HUMAN Lactoylglutathione lyase OS=Homo sapiens OX=9606 GN=GLO1 PE=1 SV=4	1.008e-05	1	K	K(1)ATLELTHNWGTEDDETQSYHNGNSDPR	4	-1.8494	1	1	0	17270000	1	24.0418
sp|Q8TB36|GDAP1_HUMAN	173	>sp|Q8TB36|GDAP1_HUMAN Ganglioside-induced differentiation-associated protein 1 OS=Homo sapiens OX=9606 GN=GDAP1 PE=1 SV=3	0.000235752	1	K	K(1)LAEENPDLQEAYIAK	3	4.4083	1	1	0	16774000	1	23.9997
sp|Q9NWD9|BEX4_HUMAN	91	>sp|Q9NWD9|BEX4_HUMAN Protein BEX4 OS=Homo sapiens OX=9606 GN=BEX4 PE=1 SV=1	0.00632274	1	K	FVGQMMEIK(1)R	3	-0.78196	1	1	0	16770000	1	23.9994
sp|Q96HS1|PGAM5_HUMAN	88	>sp|Q96HS1|PGAM5_HUMAN Serine/threonine-protein phosphatase PGAM5, mitochondrial OS=Homo sapiens OX=9606 GN=PGAM5 PE=1 SV=2	0.000127368	1	K	NVESGEEELASK(0.999)LDHYK(0.001)	4	-1.4228	9.3664e+06	6.16181e+06	-0.604141	16533000	1	23.9788
sp|P06748|NPM_HUMAN	27	>sp|P06748|NPM_HUMAN Nucleophosmin OS=Homo sapiens OX=9606 GN=NPM1 PE=1 SV=2	0.000352835	1	K	ADK(0.995)DYHFK(0.005)VDNDENEHQLSLR	5	-1.6792	1	1	0	16444000	1	23.9711
sp|P13010|XRCC5_HUMAN	265	>sp|P13010|XRCC5_HUMAN X-ray repair cross-complementing protein 5 OS=Homo sapiens OX=9606 GN=XRCC5 PE=1 SV=3	0.0177618	1	K	IAAYK(1)SILQER	3	2.7277	1	1	0	16136000	1	23.9438
sp|P32969|RL9_HUMAN	174	>sp|P32969|RL9_HUMAN 60S ribosomal protein L9 OS=Homo sapiens OX=9606 GN=RPL9 PE=1 SV=1	0.000968366	1	K	K(1)FLDGIYVSEK	3	-0.82409	8.93662e+06	6.37585e+06	-0.487112	16064000	1	23.9373
sp|P11142|HSP7C_HUMAN	128	>sp|P11142|HSP7C_HUMAN Heat shock cognate 71 kDa protein OS=Homo sapiens OX=9606 GN=HSPA8 PE=1 SV=1	0.000924809	1	K	SFYPEEVSSMVLTK(0.445)MK(0.555)	3	-1.3023	1	1.28906e+07	23.6198	15956000	1	23.9276
sp|Q9H2K8|TAOK3_HUMAN	855	>sp|Q9H2K8|TAOK3_HUMAN Serine/threonine-protein kinase TAO3 OS=Homo sapiens OX=9606 GN=TAOK3 PE=1 SV=2	9.16856e-05	1	K	IEEELAALQK(1)ER	3	3.2188	9.42535e+06	1.51411e+06	-2.63808	15894000	1	23.922
sp|P67809|YBOX1_HUMAN;sp|P16989|YBOX3_HUMAN;sp|Q9Y2T7|YBOX2_HUMAN	81;113;116	>sp|P67809|YBOX1_HUMAN Nuclease-sensitive element-binding protein 1 OS=Homo sapiens OX=9606 GN=YBX1 PE=1 SV=3;>sp|P16989|YBOX3_HUMAN Y-box-binding protein 3 OS=Homo sapiens OX=9606 GN=YBX3 PE=1 SV=4;>sp|Q9Y2T7|YBOX2_HUMAN Y-box-binding protein 2 OS=Homo sa	0.00148861	1	K	NDTK(1)EDVFVHQTAIK	3	1.7645	1	1	0	15717000	1	23.9058
sp|Q9H467|CUED2_HUMAN	121	>sp|Q9H467|CUED2_HUMAN CUE domain-containing protein 2 OS=Homo sapiens OX=9606 GN=CUEDC2 PE=1 SV=1	4.16404e-08	1	K	NKENLQPQSSGVQGQVPISPEPLQRPEMLK(1)EETR	5	0.12655	1	2.15571e+07	24.3617	15683000	1	23.9027
sp|Q7Z3T8|ZFY16_HUMAN	1395	>sp|Q7Z3T8|ZFY16_HUMAN Zinc finger FYVE domain-containing protein 16 OS=Homo sapiens OX=9606 GN=ZFYVE16 PE=1 SV=3	0.00055128	1	K	EYVDICWVDAEEK(0.405)GNK(0.595)	3	-0.51353	1	1	0	15675000	1	23.902
sp|Q99536|VAT1_HUMAN	22	>sp|Q99536|VAT1_HUMAN Synaptic vesicle membrane protein VAT-1 homolog OS=Homo sapiens OX=9606 GN=VAT1 PE=1 SV=2	1.76909e-24	1	K	EVAEAATGEDASSPPPK(1)TEAASDPQHPAASEGAAAAAASPPLLR	4	1.6725	1	1	0	15673000	1	23.9018
sp|P05023|AT1A1_HUMAN	36	>sp|P05023|AT1A1_HUMAN Sodium/potassium-transporting ATPase subunit alpha-1 OS=Homo sapiens OX=9606 GN=ATP1A1 PE=1 SV=1	0.00426065	1	K	DRDMDELK(0.531)K(0.469)EVSMDDHK	4	-0.39281	1	1	0	15594000	1	23.8945
sp|Q8N1F7|NUP93_HUMAN	359	>sp|Q8N1F7|NUP93_HUMAN Nuclear pore complex protein Nup93 OS=Homo sapiens OX=9606 GN=NUP93 PE=1 SV=2	4.50698e-10	1	K	TWFQEYMNSK(1)DRR	4	0.16446	6.09873e+07	5.28405e+07	-0.206864	15473000	1	23.8832
sp|Q9BQE5|APOL2_HUMAN	303	>sp|Q9BQE5|APOL2_HUMAN Apolipoprotein L2 OS=Homo sapiens OX=9606 GN=APOL2 PE=1 SV=1	0.00137876	1	K	HLLEGAK(1)SESAEELK	3	0.39016	1.87282e+07	2.4e+07	0.357825	15343000	1	23.8711
sp|O94888|UBXN7_HUMAN	158	>sp|O94888|UBXN7_HUMAN UBX domain-containing protein 7 OS=Homo sapiens OX=9606 GN=UBXN7 PE=1 SV=2	0.000630775	1	K	GSFETAK(1)ECGQMQNK	3	-0.37896	1	2.29987e+07	24.4551	15226000	1	23.86
sp|P31641|SC6A6_HUMAN	24	>sp|P31641|SC6A6_HUMAN Sodium- and chloride-dependent taurine transporter OS=Homo sapiens OX=9606 GN=SLC6A6 PE=1 SV=2	2.14854e-33	1;2	K	DILKPSPGK(1)SPGTRPEDEAEGKPPQR	4	0.53762	5.00659e+08	3.01258e+08	-0.73283	15129000	1	23.8508
sp|O14964|HGS_HUMAN	226	>sp|O14964|HGS_HUMAN Hepatocyte growth factor-regulated tyrosine kinase substrate OS=Homo sapiens OX=9606 GN=HGS PE=1 SV=1	1.63283e-17	1	K	K(0.236)AEGK(0.764)ATSTTELPPEYLTSPLSQQSQLPPK	4	0.3079	3.71288e+07	1	-25.146	15025000	1	23.8409
sp|P13010|XRCC5_HUMAN	648	>sp|P13010|XRCC5_HUMAN X-ray repair cross-complementing protein 5 OS=Homo sapiens OX=9606 GN=XRCC5 PE=1 SV=3	0.00553659	1	K	AFREEAIK(1)FSEEQR	4	0.60591	5.6819e+06	1.1841e+07	1.05935	14963000	1	23.8349
sp|P23458|JAK1_HUMAN	227	>sp|P23458|JAK1_HUMAN Tyrosine-protein kinase JAK1 OS=Homo sapiens OX=9606 GN=JAK1 PE=1 SV=2	0.00730063	1	K	YIPETLNK(1)SIR	3	0.94421	1.94675e+07	1.2586e+07	-0.629245	14895000	1	23.8283
sp|P55072|TERA_HUMAN	505	>sp|P55072|TERA_HUMAN Transitional endoplasmic reticulum ATPase OS=Homo sapiens OX=9606 GN=VCP PE=1 SV=4	3.90276e-36	1	K	FLK(0.998)FGMTPSK(0.002)	2	-2.4609	5.25299e+07	5.43182e+07	0.048296	14862000	1	23.8251
sp|P35659|DEK_HUMAN	349	>sp|P35659|DEK_HUMAN Protein DEK OS=Homo sapiens OX=9606 GN=DEK PE=1 SV=1	0.00279263	1	K	K(1)VYENYPTYDLTER	3	0.7084	1	1	0	14857000	1	23.8246
sp|Q9Y2U8|MAN1_HUMAN	443	>sp|Q9Y2U8|MAN1_HUMAN Inner nuclear membrane protein Man1 OS=Homo sapiens OX=9606 GN=LEMD3 PE=1 SV=2	0.000742613	1	K	NTYNK(0.567)PK(0.433)LSEPEEELLQQFK	4	1.9225	1	1	0	14831000	1	23.8221
sp|P61764|STXB1_HUMAN	493	>sp|P61764|STXB1_HUMAN Syntaxin-binding protein 1 OS=Homo sapiens OX=9606 GN=STXBP1 PE=1 SV=1	8.83951e-07	1	K	DIMEDTIEDK(0.647)LDTK(0.353)HYPYISTR	4	1.1072	1	1	0	14812000	1	23.8203
sp|Q8IY95|TM192_HUMAN	211	>sp|Q8IY95|TM192_HUMAN Transmembrane protein 192 OS=Homo sapiens OX=9606 GN=TMEM192 PE=1 SV=1	6.87376e-08	2	K	AK(1)PEPDILEEEK(1)IYAYPSNITSETGFR	4	0.33335	1	1	0	14718000	1	23.8111
sp|O75808|CAN15_HUMAN	131	>sp|O75808|CAN15_HUMAN Calpain-15 OS=Homo sapiens OX=9606 GN=CAPN15 PE=1 SV=1	6.66683e-71	1	K	GQCEDKDEEEK(1)EEQEEEEGAAEPR	4	0.068845	7.34718e+07	4.02812e+07	-0.867081	14634000	1	23.8028
sp|Q9NPJ6|MED4_HUMAN	98	>sp|Q9NPJ6|MED4_HUMAN Mediator of RNA polymerase II transcription subunit 4 OS=Homo sapiens OX=9606 GN=MED4 PE=1 SV=1	0.000451853	1	K	IHHEMQVLEK(0.995)EVEK(0.005)R	4	1.7568	1	1	0	14564000	1	23.7959
sp|P42167|LAP2B_HUMAN	303	>sp|P42167|LAP2B_HUMAN Lamina-associated polypeptide 2, isoforms beta/gamma OS=Homo sapiens OX=9606 GN=TMPO PE=1 SV=2	0.000329994	1	K	VTGNFK(1)HASPILPITEFSDIPR	4	1.3804	1.67692e+07	1	-23.9993	14552000	1	23.7947
sp|P62888|RL30_HUMAN	36	>sp|P62888|RL30_HUMAN 60S ribosomal protein L30 OS=Homo sapiens OX=9606 GN=RPL30 PE=1 SV=2	0.046578	1	K	QTLK(1)MIR	2	-0.99198	1	1	0	14447000	1	23.7843
sp|P19634|SL9A1_HUMAN	625	>sp|P19634|SL9A1_HUMAN Sodium/hydrogen exchanger 1 OS=Homo sapiens OX=9606 GN=SLC9A1 PE=1 SV=2	0.00113073	1	K	ILPALSK(0.939)DK(0.061)EEEIR	3	1.3373	1	2.74122e+06	21.3864	14409000	1	23.7805
sp|P20020|AT2B1_HUMAN	1078	>sp|P20020|AT2B1_HUMAN Plasma membrane calcium-transporting ATPase 1 OS=Homo sapiens OX=9606 GN=ATP2B1 PE=1 SV=3	3.47004e-07	1	K	EAGHGTQK(1)EEIPEEELAEDVEEIDHAER	5	-0.23341	4.83427e+06	2.63945e+06	-0.87306	14392000	1	23.7788
sp|Q15154|PCM1_HUMAN	1181	>sp|Q15154|PCM1_HUMAN Pericentriolar material 1 protein OS=Homo sapiens OX=9606 GN=PCM1 PE=1 SV=4	1.08522e-14	1	K	TEYMAFPK(1)PFESSSSIGAEKPR	4	-0.2162	1.73528e+08	7.68426e+07	-1.17519	14386000	1	23.7782
sp|P13639|EF2_HUMAN	275	>sp|P13639|EF2_HUMAN Elongation factor 2 OS=Homo sapiens OX=9606 GN=EEF2 PE=1 SV=4	0.0294233	1	K	YFDPANGK(0.325)FSK(0.675)	2	2.6128	1	1	0	14286000	1	23.7681
sp|Q99613|EIF3C_HUMAN;sp|B5ME19|EIFCL_HUMAN	862;863	>sp|Q99613|EIF3C_HUMAN Eukaryotic translation initiation factor 3 subunit C OS=Homo sapiens OX=9606 GN=EIF3C PE=1 SV=1;>sp|B5ME19|EIFCL_HUMAN Eukaryotic translation initiation factor 3 subunit C-like protein OS=Homo sapiens OX=9606 GN=EIF3CL PE=3 SV=1	8.56032e-10	1	K	TEPTAQQNLALQLAEK(1)LGSLVENNER	3	2.1823	1	1	0	14275000	1	23.767
sp|O15173|PGRC2_HUMAN	217	>sp|O15173|PGRC2_HUMAN Membrane-associated progesterone receptor component 2 OS=Homo sapiens OX=9606 GN=PGRMC2 PE=1 SV=1	7.21582e-05	1	K	LLKPGEEPSEYTDEEDTK(0.734)DHNK(0.266)QD	4	-0.27445	1	7.50551e+06	22.8395	14124000	1	23.7516
sp|O15173|PGRC2_HUMAN	221	>sp|O15173|PGRC2_HUMAN Membrane-associated progesterone receptor component 2 OS=Homo sapiens OX=9606 GN=PGRMC2 PE=1 SV=1	0.000286893	1	K	LLKPGEEPSEYTDEEDTK(0.5)DHNK(0.5)QD	4	-0.077325	1	1	0	14124000	1	23.7516
sp|P00558|PGK1_HUMAN	106	>sp|P00558|PGK1_HUMAN Phosphoglycerate kinase 1 OS=Homo sapiens OX=9606 GN=PGK1 PE=1 SV=3	2.57351e-08	1	K	DCVGPEVEK(1)ACANPAAGSVILLENLR	3	-0.98232	1	1	0	14009000	1	23.7399
sp|P16615|AT2A2_HUMAN	650	>sp|P16615|AT2A2_HUMAN Sarcoplasmic/endoplasmic reticulum calcium ATPase 2 OS=Homo sapiens OX=9606 GN=ATP2A2 PE=1 SV=1	1.99167e-05	1	K	IGIFGQDEDVTSK(1)AFTGR	3	-0.25521	1	1	0	13966000	1	23.7354
sp|Q6IA69|NADE_HUMAN	544	>sp|Q6IA69|NADE_HUMAN Glutamine-dependent NAD(+) synthetase OS=Homo sapiens OX=9606 GN=NADSYN1 PE=1 SV=3	0.000829445	1	K	YDCSSADINPIGGISK(1)TDLR	3	0.25857	1	6.90919e+06	22.7201	13949000	1	23.7337
sp|Q15910|EZH2_HUMAN	318	>sp|Q15910|EZH2_HUMAN Histone-lysine N-methyltransferase EZH2 OS=Homo sapiens OX=9606 GN=EZH2 PE=1 SV=2	0.000640086	1	K	K(0.016)NTETALDNK(0.983)PCGPQCYQHLEGAK	4	-1.6747	1	1	0	13939000	1	23.7326
sp|Q99426|TBCB_HUMAN	203	>sp|Q99426|TBCB_HUMAN Tubulin-folding cofactor B OS=Homo sapiens OX=9606 GN=TBCB PE=1 SV=2	0.000674056	1	K	YDEPLGK(0.996)NDGSVNGK(0.004)	3	-0.49383	2.37493e+07	1.13779e+07	-1.06164	13932000	1	23.7319
sp|P26599|PTBP1_HUMAN	428	>sp|P26599|PTBP1_HUMAN Polypyrimidine tract-binding protein 1 OS=Homo sapiens OX=9606 GN=PTBP1 PE=1 SV=1	1.5745e-06	1	K	EGQEDQGLTK(1)DYGNSPLHR	3	-0.96574	1.29901e+07	9.25795e+06	-0.488645	13887000	1	23.7272
sp|Q9BQE5|APOL2_HUMAN	193	>sp|Q9BQE5|APOL2_HUMAN Apolipoprotein L2 OS=Homo sapiens OX=9606 GN=APOL2 PE=1 SV=1	0.00223596	1	K	NLDQSGTNVAK(0.991)VMK(0.009)	3	-0.42839	1	1	0	13859000	1	23.7243
sp|P25445|TNR6_HUMAN	204	>sp|P25445|TNR6_HUMAN Tumor necrosis factor receptor superfamily member 6 OS=Homo sapiens OX=9606 GN=FAS PE=1 SV=1	6.3692e-07	1	K	K(1)ENQGSHESPTLNPETVAINLSDVDLSK	4	1.2442	1	1	0	13763000	1	23.7143
sp|P52948|NUP98_HUMAN	1019	>sp|P52948|NUP98_HUMAN Nuclear pore complex protein Nup98-Nup96 OS=Homo sapiens OX=9606 GN=NUP98 PE=1 SV=4	0.00430602	1	K	LPSK(1)ADTSQEICSPR	3	-0.58768	1	1	0	13692000	1	23.7068
sp|Q14566|MCM6_HUMAN	422	>sp|Q14566|MCM6_HUMAN DNA replication licensing factor MCM6 OS=Homo sapiens OX=9606 GN=MCM6 PE=1 SV=1	9.66477e-05	1	K	AVYTSGK(1)ASSAAGLTAAVVR	3	0.19325	1.46152e+07	1	-23.801	13678000	1	23.7054
sp|P23246|SFPQ_HUMAN	271	>sp|P23246|SFPQ_HUMAN Splicing factor, proline- and glutamine-rich OS=Homo sapiens OX=9606 GN=SFPQ PE=1 SV=2	0.0100818	1	K	SEEK(1)ISDSEGFK	3	-1.4818	1	1	0	13671000	1	23.7046
sp|Q9HAV0|GBB4_HUMAN	23	>sp|Q9HAV0|GBB4_HUMAN Guanine nucleotide-binding protein subunit beta-4 OS=Homo sapiens OX=9606 GN=GNB4 PE=1 SV=3	1.10364e-14	1	K	K(1)ACNDATLVQITSNMDSVGR	3	0.52429	1	1	0	13658000	1	23.7032
sp|P07900|HS90A_HUMAN	632	>sp|P07900|HS90A_HUMAN Heat shock protein HSP 90-alpha OS=Homo sapiens OX=9606 GN=HSP90AA1 PE=1 SV=5	0.00142131	1	K	K(1)HLEINPDHSIIETLR	4	-1.3845	1	1	0	13604000	1	23.6975
sp|Q07955|SRSF1_HUMAN	138	>sp|Q07955|SRSF1_HUMAN Serine/arginine-rich splicing factor 1 OS=Homo sapiens OX=9606 GN=SRSF1 PE=1 SV=2	6.28716e-05	1	K	VVVSGLPPSGSWQDLK(1)DHMR	4	-1.2611	1.86408e+07	2.6056e+07	0.483149	13561000	1	23.693
sp|O14818|PSA7_HUMAN	218	>sp|O14818|PSA7_HUMAN Proteasome subunit alpha type-7 OS=Homo sapiens OX=9606 GN=PSMA7 PE=1 SV=1	0.00224481	1	K	DQSLK(1)ILNPEEIEK	3	-0.284	1	1	0	13552000	1	23.692
sp|Q14118|DAG1_HUMAN	808	>sp|Q14118|DAG1_HUMAN Dystroglycan OS=Homo sapiens OX=9606 GN=DAG1 PE=1 SV=2	1.00424e-07	1	K	GVPIIFADELDDSK(1)PPPSSSMPLILQEEK	3	-0.28932	1	1	0	13539000	1	23.6906
sp|Q9Y5M8|SRPRB_HUMAN	227	>sp|Q9Y5M8|SRPRB_HUMAN Signal recognition particle receptor subunit beta OS=Homo sapiens OX=9606 GN=SRPRB PE=1 SV=3	0.000129782	1	K	SAAPSTLDSSSTAPAQLGK(0.818)K(0.182)	3	1.6756	1	1	0	13464000	1	23.6826
sp|P30530|UFO_HUMAN	523	>sp|P30530|UFO_HUMAN Tyrosine-protein kinase receptor UFO OS=Homo sapiens OX=9606 GN=AXL PE=1 SV=3	0.00135536		K	TTEATLNSLGISEELK(0.986)EK(0.014)	3	-0.84754	1.25168e+07	9.86085e+06	-0.344078	13428000	1	23.6787
sp|Q7L5N1|CSN6_HUMAN	102	>sp|Q7L5N1|CSN6_HUMAN COP9 signalosome complex subunit 6 OS=Homo sapiens OX=9606 GN=COPS6 PE=1 SV=1	2.0975e-05	1	K	IIIDK(1)EYYYTKEEQFK	4	0.87579	1.6139e+07	1.74163e+07	0.109886	13320000	1	23.6671
sp|P13929|ENOB_HUMAN	275	>sp|P13929|ENOB_HUMAN Beta-enolase OS=Homo sapiens OX=9606 GN=ENO3 PE=1 SV=5	0.010542	1	K	HITGEK(0.998)LGELYK(0.002)	3	0.96177	1	3.06547e+06	21.5477	13314000	1	23.6664
sp|P17980|PRS6A_HUMAN	372	>sp|P17980|PRS6A_HUMAN 26S proteasome regulatory subunit 6A OS=Homo sapiens OX=9606 GN=PSMC3 PE=1 SV=3	0.000724085	1	K	K(1)MNVSPDVNYEELAR	3	2.6875	1	1	0	13297000	1	23.6646
sp|Q9ULT8|HECD1_HUMAN	255	>sp|Q9ULT8|HECD1_HUMAN E3 ubiquitin-protein ligase HECTD1 OS=Homo sapiens OX=9606 GN=HECTD1 PE=1 SV=3	6.55713e-05	1	K	MAAAGGTVSGPSSACK(1)PGR	3	-0.3193	5.08053e+06	5.01373e+06	-0.019095	13277000	1	23.6624
sp|Q9Y6M5|ZNT1_HUMAN	461	>sp|Q9Y6M5|ZNT1_HUMAN Zinc transporter 1 OS=Homo sapiens OX=9606 GN=SLC30A1 PE=1 SV=3	0.000381221	1	K	DAEK(1)TPAVSISCLELSNNLEK	3	-1.5818	5.96745e+06	4.33683e+06	-0.460473	13127000	1	23.646
sp|P41091|IF2G_HUMAN	121	>sp|P41091|IF2G_HUMAN Eukaryotic translation initiation factor 2 subunit 3 OS=Homo sapiens OX=9606 GN=EIF2S3 PE=1 SV=3	0.00113007	1	K	SCGSSTPDEFPTDIPGTK(0.561)GNFK(0.439)	3	0.56284	1	1	0	13052000	1	23.6378
sp|P62633|CNBP_HUMAN	118	>sp|P62633|CNBP_HUMAN Cellular nucleic acid-binding protein OS=Homo sapiens OX=9606 GN=CNBP PE=1 SV=1	2.38498e-05	1	K	DCDHADEQK(1)CYSCGEFGHIQK	4	0.40225	1	7.54235e+06	22.8466	13003000	1	23.6323
sp|O60749|SNX2_HUMAN	116	>sp|O60749|SNX2_HUMAN Sorting nexin-2 OS=Homo sapiens OX=9606 GN=SNX2 PE=1 SV=2	0.00196744	1	K	IESK(1)SMSAPVIFDR	3	-0.94102	1	1.58717e+07	23.92	12974000	1	23.6291
sp|O14617|AP3D1_HUMAN	352	>sp|O14617|AP3D1_HUMAN AP-3 complex subunit delta-1 OS=Homo sapiens OX=9606 GN=AP3D1 PE=1 SV=1	2.1102e-05	1	K	DLILQCLDDK(1)DESIR	3	-1.0042	1.00864e+07	7.00109e+06	-0.52676	12941000	1	23.6254
sp|O60312|AT10A_HUMAN	546	>sp|O60312|AT10A_HUMAN Probable phospholipid-transporting ATPase VA OS=Homo sapiens OX=9606 GN=ATP10A PE=2 SV=2	0.00517583	1	K	VSECDK(1)SLAVAR	3	-0.98555	1.01446e+07	2.71334e+06	-1.90257	12905000	1	23.6214
sp|Q86VP1|TAXB1_HUMAN	465	>sp|Q86VP1|TAXB1_HUMAN Tax1-binding protein 1 OS=Homo sapiens OX=9606 GN=TAX1BP1 PE=1 SV=2	0.000613706	1	K	QINK(1)LSDQSANNNNVFTK	3	-0.72944	1	1	0	12830000	1	23.613
sp|P08133|ANXA6_HUMAN	135	>sp|P08133|ANXA6_HUMAN Annexin A6 OS=Homo sapiens OX=9606 GN=ANXA6 PE=1 SV=3	0.000380042		K	TNEQMHQLVAAYK(1)DAYER	3	1.4401	4.22315e+06	4.7399e+06	0.166538	12824000	1	23.6123
sp|P60842|IF4A1_HUMAN	237	>sp|P60842|IF4A1_HUMAN Eukaryotic initiation factor 4A-I OS=Homo sapiens OX=9606 GN=EIF4A1 PE=1 SV=1	0.0398637		K	ILVK(0.782)K(0.218)EELTLEGIR	3	-0.74689	1	1	0	12771000	1	23.6064
sp|Q9Y4P3|TBL2_HUMAN	120	>sp|Q9Y4P3|TBL2_HUMAN Transducin beta-like protein 2 OS=Homo sapiens OX=9606 GN=TBL2 PE=1 SV=1	0.0016489	1	K	IWSTK(1)DFLQR	3	0.32832	1.53691e+07	1	-23.8735	12743000	1	23.6032
sp|P34932|HSP74_HUMAN	135	>sp|P34932|HSP74_HUMAN Heat shock 70 kDa protein 4 OS=Homo sapiens OX=9606 GN=HSPA4 PE=1 SV=4	4.86108e-05	1	K	K(1)PVVDCVVSVPCFYTDAER	3	-0.75846	1	1.6696e+06	20.6711	12726000	1	23.6013
sp|O76021|RL1D1_HUMAN	100	>sp|O76021|RL1D1_HUMAN Ribosomal L1 domain-containing protein 1 OS=Homo sapiens OX=9606 GN=RSL1D1 PE=1 SV=3	2.07347e-08	1	K	SDSEDICLFTK(0.999)DEPNSTPEK(0.001)TEQFYR	4	-0.39981	7.85569e+06	1	-22.9053	12681000	1	23.5962
sp|Q13137|CACO2_HUMAN	299	>sp|Q13137|CACO2_HUMAN Calcium-binding and coiled-coil domain-containing protein 2 OS=Homo sapiens OX=9606 GN=CALCOCO2 PE=1 SV=1	4.71182e-05	1	K	K(1)QQELMDENFDLSKR	4	-0.50666	1.00993e+07	1	-23.2678	12641000	1	23.5916
sp|P25685|DNJB1_HUMAN	35	>sp|P25685|DNJB1_HUMAN DnaJ homolog subfamily B member 1 OS=Homo sapiens OX=9606 GN=DNAJB1 PE=1 SV=4	0.000409295	1	K	YHPDK(0.595)NK(0.397)EPGAEEK(0.008)FK	4	0.18443	1	1	0	12445000	1	23.5691
sp|Q9H7F0|AT133_HUMAN	128	>sp|Q9H7F0|AT133_HUMAN Probable cation-transporting ATPase 13A3 OS=Homo sapiens OX=9606 GN=ATP13A3 PE=1 SV=4	5.12905e-05	1	K	ISK(1)YSQTESQQIR	3	-0.67014	1.57911e+07	1.38445e+07	-0.1898	12418000	1	23.5659
sp|Q7Z5L9|I2BP2_HUMAN	539	>sp|Q7Z5L9|I2BP2_HUMAN Interferon regulatory factor 2-binding protein 2 OS=Homo sapiens OX=9606 GN=IRF2BP2 PE=1 SV=2	4.41621e-06	1	K	QSIK(1)QQGASGEVYCPSGEK	3	0.65671	6.5844e+06	1	-22.6506	12318000	1	23.5543
sp|P61326|MGN_HUMAN;sp|Q96A72|MGN2_HUMAN	114;116	>sp|P61326|MGN_HUMAN Protein mago nashi homolog OS=Homo sapiens OX=9606 GN=MAGOH PE=1 SV=1;>sp|Q96A72|MGN2_HUMAN Protein mago nashi homolog 2 OS=Homo sapiens OX=9606 GN=MAGOHB PE=1 SV=1	2.16521e-06	1	K	IGSLIDVNQSK(1)DPEGLR	3	0.44935	1	2.71365e+07	24.6937	12312000	1	23.5536
sp|P0DP25|CALM3_HUMAN;sp|P0DP24|CALM2_HUMAN;sp|P0DP23|CALM1_HUMAN	76;76;76	>sp|P0DP25|CALM3_HUMAN Calmodulin-3 OS=Homo sapiens OX=9606 GN=CALM3 PE=1 SV=1;>sp|P0DP24|CALM2_HUMAN Calmodulin-2 OS=Homo sapiens OX=9606 GN=CALM2 PE=1 SV=1;>sp|P0DP23|CALM1_HUMAN Calmodulin-1 OS=Homo sapiens OX=9606 GN=CALM1 PE=1 SV=1	0.00811719	1	K	K(0.5)MK(0.5)DTDSEEEIREAFR	4	1.1043	1.87573e+07	1	-24.1609	12239000	1	23.545
sp|P17302|CXA1_HUMAN	264	>sp|P17302|CXA1_HUMAN Gap junction alpha-1 protein OS=Homo sapiens OX=9606 GN=GJA1 PE=1 SV=2	1.05329e-102	1	K	DCGSQK(1)YAYFNGCSSPTAPLSPMSPPGYK	3	-1.0665	1.26297e+08	3.85443e+07	-1.71223	12200000	1	23.5404
sp|P08238|HS90B_HUMAN;sp|Q58FF7|H90B3_HUMAN;sp|P14625|ENPL_HUMAN	53;53;114	>sp|P08238|HS90B_HUMAN Heat shock protein HSP 90-beta OS=Homo sapiens OX=9606 GN=HSP90AB1 PE=1 SV=4;>sp|Q58FF7|H90B3_HUMAN Putative heat shock protein HSP 90-beta-3 OS=Homo sapiens OX=9606 GN=HSP90AB3P PE=5 SV=1;>sp|P14625|ENPL_HUMAN Endoplasmin OS=Homo sa	0.000167988	1	K	ELISNASDALDK(1)IR	3	-2.2932	1	1.95001e+07	24.217	12106000	1	23.5292
sp|Q9Y5L4|TIM13_HUMAN	53	>sp|Q9Y5L4|TIM13_HUMAN Mitochondrial import inner membrane translocase subunit Tim13 OS=Homo sapiens OX=9606 GN=TIMM13 PE=1 SV=1	0.0016413	1	K	CIGK(1)PGGSLDNSEQK	3	1.4095	1	1	0	12033000	1	23.5205
sp|P29597|TYK2_HUMAN	207	>sp|P29597|TYK2_HUMAN Non-receptor tyrosine-protein kinase TYK2 OS=Homo sapiens OX=9606 GN=TYK2 PE=1 SV=3	0.0119614		K	HGIPLEEVAK(0.804)K(0.196)	3	-0.69148	1.21139e+07	7.40241e+06	-0.710599	11950000	1	23.5105
sp|P29317|EPHA2_HUMAN	778	>sp|P29317|EPHA2_HUMAN Ephrin type-A receptor 2 OS=Homo sapiens OX=9606 GN=EPHA2 PE=1 SV=2	0.000173509	1	K	VLEDDPEATYTTSGGK(1)IPIR	3	-1.1997	1.40944e+07	1.77826e+07	0.335342	11909000	1	23.5055
sp|P05023|AT1A1_HUMAN	24	>sp|P05023|AT1A1_HUMAN Sodium/potassium-transporting ATPase subunit alpha-1 OS=Homo sapiens OX=9606 GN=ATP1A1 PE=1 SV=1	3.34904e-07	1	K	DKYEPAAVSEQGDK(0.057)K(0.356)GK(0.588)	3	1.0533	1	1	0	11903000	1	23.5048
sp|Q6IAA8|LTOR1_HUMAN	104	>sp|Q6IAA8|LTOR1_HUMAN Ragulator complex protein LAMTOR1 OS=Homo sapiens OX=9606 GN=LAMTOR1 PE=1 SV=2	6.43268e-07	1	K	K(1)LPPLPSLTSQPHQVLASEPIPFSDLQQVSR	4	1.6038	1	1	0	11793000	1	23.4914
sp|P55884|EIF3B_HUMAN	516	>sp|P55884|EIF3B_HUMAN Eukaryotic translation initiation factor 3 subunit B OS=Homo sapiens OX=9606 GN=EIF3B PE=1 SV=3	4.22798e-05	1	K	NLFNVVDCK(0.993)LHWQK(0.007)	4	-0.538	8.3207e+06	1.10888e+07	0.414326	11751000	1	23.4863
sp|Q15181|IPYR_HUMAN	176	>sp|Q15181|IPYR_HUMAN Inorganic pyrophosphatase OS=Homo sapiens OX=9606 GN=PPA1 PE=1 SV=2	0.000369034	1	K	VIAINVDDPDAANYNDINDVK(1)R	3	1.3014	4.92669e+06	1	-22.2322	11724000	1	23.483
sp|Q9NNW5|WDR6_HUMAN	910	>sp|Q9NNW5|WDR6_HUMAN WD repeat-containing protein 6 OS=Homo sapiens OX=9606 GN=WDR6 PE=1 SV=1	4.24752e-06		K	ILQLLAETFHHK(1)R	3	-0.74784	1	6.25463e+06	22.5765	11633000	1	23.4717
sp|O15020|SPTN2_HUMAN	1868	>sp|O15020|SPTN2_HUMAN Spectrin beta chain, non-erythrocytic 2 OS=Homo sapiens OX=9606 GN=SPTBN2 PE=1 SV=3	0.000497222		K	LQK(1)AYAGDKAEEIGR	3	2.5893	5.74084e+06	6.52495e+06	0.184705	11597000	1	23.4672
sp|P63000|RAC1_HUMAN	153	>sp|P63000|RAC1_HUMAN Ras-related C3 botulinum toxin substrate 1 OS=Homo sapiens OX=9606 GN=RAC1 PE=1 SV=1	0.000158046	1	K	EIGAVK(1)YLECSALTQR	3	0.36956	1.22133e+07	1.04806e+07	-0.220729	11576000	1	23.4646
sp|Q96J84|KIRR1_HUMAN	582	>sp|Q96J84|KIRR1_HUMAN Kin of IRRE-like protein 1 OS=Homo sapiens OX=9606 GN=KIRREL1 PE=1 SV=2	1.06628e-05	1	K	AIYSSFK(0.001)DDVDLK(0.999)QDLR	3	-1.3876	7.95073e+06	5.26985e+06	-0.593325	11573000	1	23.4643
sp|Q5VXT5|SYPL2_HUMAN	271	>sp|Q5VXT5|SYPL2_HUMAN Synaptophysin-like protein 2 OS=Homo sapiens OX=9606 GN=SYPL2 PE=2 SV=1	2.01857e-22	1	K	ETPWHGQGQGQDQDQDQDQGQGPSQESAAEQGAVEK(1)Q	4	-0.89691	1	1	0	11412000	1	23.444
sp|Q9C0E8|LNP_HUMAN	147	>sp|Q9C0E8|LNP_HUMAN Endoplasmic reticulum junction formation protein lunapark OS=Homo sapiens OX=9606 GN=LNPK PE=1 SV=2	0.000490706	1	K	AK(1)ECEPPSAGAAVTARPGQEIR	4	0.95445	1	1	0	11247000	1	23.423
sp|Q9H040|SPRTN_HUMAN	414	>sp|Q9H040|SPRTN_HUMAN SprT-like domain-containing protein Spartan OS=Homo sapiens OX=9606 GN=SPRTN PE=1 SV=2	0.00144415	1	K	LEDK(1)TVFDNFFIKK	4	-0.48334	1	1	0	11246000	1	23.4229
sp|Q9H2E6|SEM6A_HUMAN	715	>sp|Q9H2E6|SEM6A_HUMAN Semaphorin-6A OS=Homo sapiens OX=9606 GN=SEMA6A PE=1 SV=2	7.45411e-05	1	K	LSGLFGDTQSK(0.905)DPK(0.095)PEAILTPLMHNGK	4	0.98359	1	1	0	11209000	1	23.4182
sp|O95140|MFN2_HUMAN	406	>sp|O95140|MFN2_HUMAN Mitofusin-2 OS=Homo sapiens OX=9606 GN=MFN2 PE=1 SV=3	0.000227889	1	K	FIDK(1)QLELLAQDYK	3	0.00026742	1.56281e+06	1.52821e+06	-0.0323055	11117000	1	23.4063
sp|Q15424|SAFB1_HUMAN	83	>sp|Q15424|SAFB1_HUMAN Scaffold attachment factor B1 OS=Homo sapiens OX=9606 GN=SAFB PE=1 SV=4	0.000609341	1	K	AIEDEGGNPDEIEITSEGNK(0.5)K(0.5)	3	0.35608	8.01637e+06	5.95148e+06	-0.429701	11110000	1	23.4054
sp|Q15424|SAFB1_HUMAN	84	>sp|Q15424|SAFB1_HUMAN Scaffold attachment factor B1 OS=Homo sapiens OX=9606 GN=SAFB PE=1 SV=4	0.000609341	1	K	AIEDEGGNPDEIEITSEGNK(0.5)K(0.5)	3	0.35608	8.01637e+06	5.95148e+06	-0.429701	11110000	1	23.4054
sp|P43490|NAMPT_HUMAN	228	>sp|P43490|NAMPT_HUMAN Nicotinamide phosphoribosyltransferase OS=Homo sapiens OX=9606 GN=NAMPT PE=1 SV=1	0.00416407	1	K	GTDTVAGLALIK(0.743)K(0.257)	3	0.33588	1	1	0	11082000	1	23.4017
sp|O75970|MPDZ_HUMAN	1687	>sp|O75970|MPDZ_HUMAN Multiple PDZ domain protein OS=Homo sapiens OX=9606 GN=MPDZ PE=1 SV=2	0.00363996	1	K	K(1)ATHDEAINVLR	3	0.75858	1	804514	19.6178	11017000	1	23.3932
sp|Q15738|NSDHL_HUMAN	31	>sp|Q15738|NSDHL_HUMAN Sterol-4-alpha-carboxylate 3-dehydrogenase, decarboxylating OS=Homo sapiens OX=9606 GN=NSDHL PE=1 SV=2	0.000412149	1	K	VNADIEK(0.995)VNQNQAK(0.005)	3	-0.40702	1.71738e+07	1.63255e+07	-0.0730796	10986000	1	23.3892
sp|Q8IWB7|WDFY1_HUMAN	352	>sp|Q8IWB7|WDFY1_HUMAN WD repeat and FYVE domain-containing protein 1 OS=Homo sapiens OX=9606 GN=WDFY1 PE=1 SV=1	1.493e-05	1	K	VCDSCYDSIK(1)DEDR	3	0.057102	1.73164e+07	2.25635e+07	0.381849	10965000	1	23.3864
sp|P34932|HSP74_HUMAN	674	>sp|P34932|HSP74_HUMAN Heat shock 70 kDa protein 4 OS=Homo sapiens OX=9606 GN=HSPA4 PE=1 SV=4	0.0075225	1	K	QVYVDK(1)LAELK	3	2.0128	1	1	0	10957000	1	23.3853
sp|Q9Y6M1|IF2B2_HUMAN	588	>sp|Q9Y6M1|IF2B2_HUMAN Insulin-like growth factor 2 mRNA-binding protein 2 OS=Homo sapiens OX=9606 GN=IGF2BP2 PE=1 SV=2	0.0024885	1	K	QQEQK(1)YPQGVASQR	3	0.21582	2.99362e+07	3.16981e+07	0.0825058	10949000	1	23.3843
sp|Q9UMS4|PRP19_HUMAN	244	>sp|Q9UMS4|PRP19_HUMAN Pre-mRNA-processing factor 19 OS=Homo sapiens OX=9606 GN=PRPF19 PE=1 SV=1	0.000374826	1	K	ILTGGADK(0.999)NVVVFDK(0.001)	3	0.063543	1.10438e+07	1	-23.3967	10929000	1	23.3817
sp|P45974|UBP5_HUMAN	357	>sp|P45974|UBP5_HUMAN Ubiquitin carboxyl-terminal hydrolase 5 OS=Homo sapiens OX=9606 GN=USP5 PE=1 SV=2	4.40544e-25	1	K	K(0.142)YVDK(0.509)LEK(0.349)IFQNAPTDPTQDFSTQVAK	5	-0.33594	1	1	0	10898000	1	23.3776
sp|Q9UNA4|POLI_HUMAN	678	>sp|Q9UNA4|POLI_HUMAN DNA polymerase iota OS=Homo sapiens OX=9606 GN=POLI PE=1 SV=3	1.87351e-06	1	K	NHTTDSHK(1)QTVATDSHEGLTENREPDSVDEK	5	1.1996	1	1	0	10868000	1	23.3736
sp|Q9UJY5|GGA1_HUMAN	165	>sp|Q9UJY5|GGA1_HUMAN ADP-ribosylation factor-binding protein GGA1 OS=Homo sapiens OX=9606 GN=GGA1 PE=1 SV=1	0.000640086	1	K	LPDDTTFPLPPPRPK(0.992)NVIFEDEEK(0.008)	4	-0.76333	1	1	0	10846000	1	23.3707
sp|O00148|DX39A_HUMAN;sp|Q13838|DX39B_HUMAN	130;131	>sp|O00148|DX39A_HUMAN ATP-dependent RNA helicase DDX39A OS=Homo sapiens OX=9606 GN=DDX39A PE=1 SV=2;>sp|Q13838|DX39B_HUMAN Spliceosome RNA helicase DDX39B OS=Homo sapiens OX=9606 GN=DDX39B PE=1 SV=1	0.00723902	1	K	ELAFQISK(1)EYER	3	-1.094	1	1	0	10813000	1	23.3663
sp|Q9BVK2|ALG8_HUMAN	223	>sp|Q9BVK2|ALG8_HUMAN Probable dolichyl pyrophosphate Glc1Man9GlcNAc2 alpha-1,3-glucosyltransferase OS=Homo sapiens OX=9606 GN=ALG8 PE=1 SV=2	0.00332704	1	K	SYCFTANK(1)PDGSIR	3	-1.7033	1.12597e+07	1	-23.4247	10712000	1	23.3527
sp|Q8N6I4|TM251_HUMAN	150	>sp|Q8N6I4|TM251_HUMAN Transmembrane protein 251 OS=Homo sapiens OX=9606 GN=TMEM251 PE=2 SV=4	0.00641602	1	K	HQAFVK(1)ASNQISR	3	-0.58952	1	1	0	10658000	1	23.3454
sp|O00635|TRI38_HUMAN	184	>sp|O00635|TRI38_HUMAN E3 ubiquitin-protein ligase TRIM38 OS=Homo sapiens OX=9606 GN=TRIM38 PE=1 SV=1	0.00423529		K	SDFK(1)NLQCFLHEEEK	3	-0.24505	1	7.24538e+06	22.7886	10631000	1	23.3418
sp|Q92624|APBP2_HUMAN	396	>sp|Q92624|APBP2_HUMAN Amyloid protein-binding protein 2 OS=Homo sapiens OX=9606 GN=APPBP2 PE=1 SV=2	6.48966e-05	1	K	ALILEEIAIDCHNK(1)ETEQR	3	-1.9601	9.97011e+06	1	-23.2492	10503000	1	23.3243
sp|P49790|NU153_HUMAN	672	>sp|P49790|NU153_HUMAN Nuclear pore complex protein Nup153 OS=Homo sapiens OX=9606 GN=NUP153 PE=1 SV=2	0.000748135	1	K	AGSSWQCDTCLLQNK(0.987)VTDNK(0.013)	3	-0.34089	1	1	0	10446000	1	23.3164
sp|Q15185|TEBP_HUMAN	48	>sp|Q15185|TEBP_HUMAN Prostaglandin E synthase 3 OS=Homo sapiens OX=9606 GN=PTGES3 PE=1 SV=1	1.69375e-07	1	K	LTFSCLGGSDNFK(1)HLNEIDLFHCIDPNDSK	5	-0.68945	1	1	0	10349000	1	23.303
sp|Q9UHC7|MKRN1_HUMAN	389	>sp|Q9UHC7|MKRN1_HUMAN E3 ubiquitin-protein ligase makorin-1 OS=Homo sapiens OX=9606 GN=MKRN1 PE=1 SV=3	4.77892e-05	1	K	GSCPFGGNCFYK(1)HAYPDGR	4	0.70065	1	1.61351e+07	23.9437	10341000	1	23.3019
sp|O43795|MYO1B_HUMAN	972	>sp|O43795|MYO1B_HUMAN Unconventional myosin-Ib OS=Homo sapiens OX=9606 GN=MYO1B PE=1 SV=3	8.98558e-08	1	K	ALYPSSVGQPFQGAYLEINK(0.842)NPK(0.158)	3	0.047455	3.72118e+07	2.12422e+07	-0.808827	10312000	1	23.2978
sp|P61086|UBE2K_HUMAN	165	>sp|P61086|UBE2K_HUMAN Ubiquitin-conjugating enzyme E2 K OS=Homo sapiens OX=9606 GN=UBE2K PE=1 SV=3	0.006971	1	K	K(1)IENLCAMGFDR	3	3.4556	1	1	0	10290000	1	23.2947
sp|Q92508|PIEZ1_HUMAN	1819	>sp|Q92508|PIEZ1_HUMAN Piezo-type mechanosensitive ion channel component 1 OS=Homo sapiens OX=9606 GN=PIEZO1 PE=1 SV=4	1.88291e-17	1	K	EHDK(1)SGEEEQGAEEGPGVPAATTEDHIQVEAR	5	0.038593	3.66093e+07	2.60745e+07	-0.489569	10183000	1	23.2797
sp|P51809|VAMP7_HUMAN	125	>sp|P51809|VAMP7_HUMAN Vesicle-associated membrane protein 7 OS=Homo sapiens OX=9606 GN=VAMP7 PE=1 SV=3	1.95517e-07	1	K	GLDK(1)VMETQAQVDELK	2	-0.36154	5.2284e+06	4.78003e+06	-0.129348	10154000	1	23.2755
sp|P51149|RAB7A_HUMAN	191	>sp|P51149|RAB7A_HUMAN Ras-related protein Rab-7a OS=Homo sapiens OX=9606 GN=RAB7A PE=1 SV=1	0.000339901	1	K	QETEVELYNEFPEPIK(0.75)LDK(0.25)NDR	4	1.7112	1	5.59276e+06	22.4151	10151000	1	23.2751
sp|Q92995|UBP13_HUMAN	414	>sp|Q92995|UBP13_HUMAN Ubiquitin carboxyl-terminal hydrolase 13 OS=Homo sapiens OX=9606 GN=USP13 PE=1 SV=2	2.72783e-06	1	K	SELIEQVMK(0.997)EEHK(0.003)PQQNGISPR	4	0.57601	9.09235e+06	1.14798e+07	0.336375	10141000	1	23.2737
sp|Q12965|MYO1E_HUMAN	555	>sp|Q12965|MYO1E_HUMAN Unconventional myosin-Ie OS=Homo sapiens OX=9606 GN=MYO1E PE=1 SV=2	0.0027396	1	K	SLFPENLQADK(0.451)K(0.549)	3	2.5404	1.89334e+07	6.25082e+06	-1.59881	10121000	1	23.2708
sp|P78371|TCPB_HUMAN	263	>sp|P78371|TCPB_HUMAN T-complex protein 1 subunit beta OS=Homo sapiens OX=9606 GN=CCT2 PE=1 SV=4	0.00339427	1	K	VRVDSTAK(1)VAEIEHAEKEK	4	0.73086	4.24309e+06	7.78232e+06	0.875086	10112000	1	23.2696
sp|Q8IWK6|AGRA3_HUMAN	1248	>sp|Q8IWK6|AGRA3_HUMAN Adhesion G protein-coupled receptor A3 OS=Homo sapiens OX=9606 GN=ADGRA3 PE=1 SV=2	5.63337e-05	1	K	QYNPPQQDSSDACSTLPK(1)SSR	3	-0.55047	1	1.56361e+07	23.8984	10088000	1	23.2661
sp|P25098|ARBK1_HUMAN;sp|P35626|ARBK2_HUMAN	344;344	>sp|P25098|ARBK1_HUMAN Beta-adrenergic receptor kinase 1 OS=Homo sapiens OX=9606 GN=GRK2 PE=1 SV=2;>sp|P35626|ARBK2_HUMAN Beta-adrenergic receptor kinase 2 OS=Homo sapiens OX=9606 GN=GRK3 PE=1 SV=2	0.00289336	1	K	ISDLGLACDFSK(0.771)K(0.229)	3	-1.4788	1	1.98345e+06	20.9196	10069000	1	23.2634
sp|Q9UBC2|EP15R_HUMAN	828	>sp|Q9UBC2|EP15R_HUMAN Epidermal growth factor receptor substrate 15-like 1 OS=Homo sapiens OX=9606 GN=EPS15L1 PE=1 SV=1	1.73392e-54	1	K	STPVSQLGSADFPEAPDPFQPLGADSGDPFQSK(0.5)K(0.5)	3	0.86044	5.82846e+06	8.06129e+06	0.467896	10008000	1	23.2547
sp|Q9UBC2|EP15R_HUMAN	829	>sp|Q9UBC2|EP15R_HUMAN Epidermal growth factor receptor substrate 15-like 1 OS=Homo sapiens OX=9606 GN=EPS15L1 PE=1 SV=1	1.73392e-54	1	K	STPVSQLGSADFPEAPDPFQPLGADSGDPFQSK(0.5)K(0.5)	3	0.86044	5.82846e+06	8.06129e+06	0.467896	10008000	1	23.2547
sp|P51965|UB2E1_HUMAN;sp|Q96LR5|UB2E2_HUMAN;sp|Q969T4|UB2E3_HUMAN	136;144;150	>sp|P51965|UB2E1_HUMAN Ubiquitin-conjugating enzyme E2 E1 OS=Homo sapiens OX=9606 GN=UBE2E1 PE=1 SV=1;>sp|Q96LR5|UB2E2_HUMAN Ubiquitin-conjugating enzyme E2 E2 OS=Homo sapiens OX=9606 GN=UBE2E2 PE=1 SV=1;>sp|Q969T4|UB2E3_HUMAN Ubiquitin-conjugating enzyme	3.37689e-14	1	K	IYHCNINSQGVICLDILK(1)DNWSPALTISK	4	0.05439	5.49823e+06	1.12277e+07	1.03002	9942400	1	23.2452
sp|P35241|RADI_HUMAN	360	>sp|P35241|RADI_HUMAN Radixin OS=Homo sapiens OX=9606 GN=RDX PE=1 SV=1	0.00121259	1	K	QIEEQTIK(0.998)AQK(0.002)	3	-4.0664	2.55278e+06	1	-21.2836	9929100	1	23.2432
sp|P13010|XRCC5_HUMAN	565	>sp|P13010|XRCC5_HUMAN X-ray repair cross-complementing protein 5 OS=Homo sapiens OX=9606 GN=XRCC5 PE=1 SV=3	5.56432e-05	1	K	DQVTAQEIFQDNHEDGPTAK(0.5)K(0.5)	4	0.93628	1.03076e+07	1.4642e+07	0.506404	9900100	1	23.239
sp|P13010|XRCC5_HUMAN	566	>sp|P13010|XRCC5_HUMAN X-ray repair cross-complementing protein 5 OS=Homo sapiens OX=9606 GN=XRCC5 PE=1 SV=3	5.56432e-05	1	K	DQVTAQEIFQDNHEDGPTAK(0.5)K(0.5)	4	0.93628	1.03076e+07	1.4642e+07	0.506404	9900100	1	23.239
sp|Q9UHP3|UBP25_HUMAN	715	>sp|Q9UHP3|UBP25_HUMAN Ubiquitin carboxyl-terminal hydrolase 25 OS=Homo sapiens OX=9606 GN=USP25 PE=1 SV=4	2.25422e-07	1	K	ALQEK(1)LLASQK	2	0.015128	1.24038e+08	1.09365e+08	-0.181636	9866700	1	23.2341
sp|Q96JN8|NEUL4_HUMAN	841	>sp|Q96JN8|NEUL4_HUMAN Neuralized-like protein 4 OS=Homo sapiens OX=9606 GN=NEURL4 PE=1 SV=2	1.30806e-06	1	K	TAK(1)GDLHYFINGQDQGAACSGLPPGK	4	-0.19542	1.72262e+07	1.21559e+07	-0.502946	9853800	1	23.2322
sp|O14595|CTDS2_HUMAN	20	>sp|O14595|CTDS2_HUMAN Carboxy-terminal domain RNA polymerase II polypeptide A small phosphatase 2 OS=Homo sapiens OX=9606 GN=CTDSP2 PE=1 SV=2	0.000210502	1	K	REDALVLTK(0.998)QGLVSK(0.002)	3	0.64006	2.61813e+07	1.2126e+07	-1.11043	9764800	1	23.2192
sp|Q12769|NU160_HUMAN	689	>sp|Q12769|NU160_HUMAN Nuclear pore complex protein Nup160 OS=Homo sapiens OX=9606 GN=NUP160 PE=1 SV=3	0.00107917	1	K	EMDYETEVEMEK(1)GFNPAQPLNIR	3	0.012405	1.29332e+07	1	-23.6246	9748400	1	23.2167
sp|P43034|LIS1_HUMAN	88	>sp|P43034|LIS1_HUMAN Platelet-activating factor acetylhydrolase IB subunit alpha OS=Homo sapiens OX=9606 GN=PAFAH1B1 PE=1 SV=2	5.12359e-06	1	K	EEFTSGGPLGQK(1)R	3	-2.0863	7.13148e+06	4.41813e+06	-0.690768	9717900	1	23.2122
sp|Q9Y263|PLAP_HUMAN	393	>sp|Q9Y263|PLAP_HUMAN Phospholipase A-2-activating protein OS=Homo sapiens OX=9606 GN=PLAA PE=1 SV=2	1.18356e-05	1	K	IGDVVGSSGANQQTSGK(0.998)VLYEGK(0.002)	3	1.365	1	7.30599e+06	22.8006	9716800	1	23.212
sp|P36578|RL4_HUMAN	239	>sp|P36578|RL4_HUMAN 60S ribosomal protein L4 OS=Homo sapiens OX=9606 GN=RPL4 PE=1 SV=5	0.0017576	1	K	LNILK(1)LAPGGHVGR	3	0.10261	4.02812e+06	2.14027e+07	2.40961	9713300	1	23.2115
sp|P09543|CN37_HUMAN	87	>sp|P09543|CN37_HUMAN 2',3'-cyclic-nucleotide 3'-phosphodiesterase OS=Homo sapiens OX=9606 GN=CNP PE=1 SV=2	0.00264253	1	K	MVSADAYK(1)ITPGAR	3	2.2325	1	1	0	9713300	1	23.2115
sp|Q9UKX7|NUP50_HUMAN	59	>sp|Q9UKX7|NUP50_HUMAN Nuclear pore complex protein Nup50 OS=Homo sapiens OX=9606 GN=NUP50 PE=1 SV=2	0.0126318		K	NVGFESDTGGAFK(0.787)GFK(0.213)	3	-0.5354	1	1	0	9626400	1	23.1986
sp|O75808|CAN15_HUMAN	126	>sp|O75808|CAN15_HUMAN Calpain-15 OS=Homo sapiens OX=9606 GN=CAPN15 PE=1 SV=1	2.36084e-10	1	K	GQCEDK(0.991)DEEEK(0.009)EEQEEEEGAAEPR	3	0.084814	4.27234e+07	3.47965e+07	-0.296083	9616100	1	23.197
sp|Q86UV5|UBP48_HUMAN	868	>sp|Q86UV5|UBP48_HUMAN Ubiquitin carboxyl-terminal hydrolase 48 OS=Homo sapiens OX=9606 GN=USP48 PE=1 SV=1	0.000140188	1	K	EYTQATIYVHK(0.995)VVDNK(0.005)	3	-2.558	1	1	0	9612100	1	23.1964
sp|Q8IZ07|AN13A_HUMAN	279	>sp|Q8IZ07|AN13A_HUMAN Ankyrin repeat domain-containing protein 13A OS=Homo sapiens OX=9606 GN=ANKRD13A PE=1 SV=3	2.34473e-07	1	K	VYTVNNVNVITK(1)IR	3	-0.33614	3.28936e+07	3.5949e+07	0.128146	9598900	1	23.1944
sp|Q13263|TIF1B_HUMAN	469	>sp|Q13263|TIF1B_HUMAN Transcription intermediary factor 1-beta OS=Homo sapiens OX=9606 GN=TRIM28 PE=1 SV=5	1.83981e-27	1	K	QGSGSSQPMEVQEGYGFGSGDDPYSSAEPHVSGVK(1)R	4	0.13416	6.43798e+06	9.33615e+06	0.536219	9597000	1	23.1942
sp|O95297|MPZL1_HUMAN	218	>sp|O95297|MPZL1_HUMAN Myelin protein zero-like protein 1 OS=Homo sapiens OX=9606 GN=MPZL1 PE=1 SV=1	0.00532838	1	K	K(1)SPSDTEGLVK	2	0.8243	2.65771e+06	2.90885e+06	0.130264	9569400	1	23.19
sp|P60660|MYL6_HUMAN	26	>sp|P60660|MYL6_HUMAN Myosin light polypeptide 6 OS=Homo sapiens OX=9606 GN=MYL6 PE=1 SV=2	0.000151369	1	K	TGDGK(1)ILYSQCGDVMR	3	-0.95921	3.53649e+07	2.84886e+07	-0.311933	9550400	1	23.1871
sp|Q969S3|ZN622_HUMAN	63	>sp|Q969S3|ZN622_HUMAN Zinc finger protein 622 OS=Homo sapiens OX=9606 GN=ZNF622 PE=1 SV=1	6.4793e-05	1	K	AVAEEESK(1)GSATYCTVCSK	3	-0.97898	1	5.2822e+06	22.3327	9529400	1	23.184
sp|P05023|AT1A1_HUMAN	458	>sp|P05023|AT1A1_HUMAN Sodium/potassium-transporting ATPase subunit alpha-1 OS=Homo sapiens OX=9606 GN=ATP1A1 PE=1 SV=1	0.000437858	1	K	AVAGDASESALLK(0.995)CIELCCGSVK(0.005)	3	-0.86539	1	1	0	9498900	1	23.1793
sp|P07900|HS90A_HUMAN;sp|Q58FG0|HS905_HUMAN	559;244	>sp|P07900|HS90A_HUMAN Heat shock protein HSP 90-alpha OS=Homo sapiens OX=9606 GN=HSP90AA1 PE=1 SV=5;>sp|Q58FG0|HS905_HUMAN Putative heat shock protein HSP 90-alpha A5 OS=Homo sapiens OX=9606 GN=HSP90AA5P PE=2 SV=1	3.24023e-05	1	K	EGLELPEDEEEK(0.151)K(0.829)K(0.021)	3	-1.0732	1.16341e+07	1.16702e+07	0.00447223	9463500	1	23.1739
sp|P08238|HS90B_HUMAN;sp|Q58FF7|H90B3_HUMAN	551;424	>sp|P08238|HS90B_HUMAN Heat shock protein HSP 90-beta OS=Homo sapiens OX=9606 GN=HSP90AB1 PE=1 SV=4;>sp|Q58FF7|H90B3_HUMAN Putative heat shock protein HSP 90-beta-3 OS=Homo sapiens OX=9606 GN=HSP90AB3P PE=5 SV=1	3.24023e-05	1	K	EGLELPEDEEEK(0.151)K(0.829)K(0.021)	3	-1.0732	1.16341e+07	1.16702e+07	0.00447223	9463500	1	23.1739
sp|Q9BTE7|DCNL5_HUMAN	49	>sp|Q9BTE7|DCNL5_HUMAN DCN1-like protein 5 OS=Homo sapiens OX=9606 GN=DCUN1D5 PE=1 SV=1	0.000159947	1	K	LISGEEHFSSK(0.859)K(0.141)	3	0.1457	1.89785e+06	1	-20.8559	9437100	1	23.1699
sp|Q12789|TF3C1_HUMAN	724	>sp|Q12789|TF3C1_HUMAN General transcription factor 3C polypeptide 1 OS=Homo sapiens OX=9606 GN=GTF3C1 PE=1 SV=4	2.96744e-14	1	K	VK(1)TSQPPVPQGEAEEDSQGK	3	1.8734	9.66956e+06	1.59448e+07	0.72156	9431800	1	23.1691
sp|P56693|SOX10_HUMAN	182	>sp|P56693|SOX10_HUMAN Transcription factor SOX-10 OS=Homo sapiens OX=9606 GN=SOX10 PE=1 SV=1	4.63971e-13	1	K	NGK(1)AAQGEAECPGGEAEQGGTAAIQAHYK	4	1.2954	1	1	0	9431500	1	23.1691
sp|P78527|PRKDC_HUMAN	3753	>sp|P78527|PRKDC_HUMAN DNA-dependent protein kinase catalytic subunit OS=Homo sapiens OX=9606 GN=PRKDC PE=1 SV=3	3.19904e-05	1	K	GHDEREHPFLVK(1)GGEDLR	4	0.75497	4.92873e+07	5.32645e+07	0.111958	9413400	1	23.1663
sp|Q9ULF5|S39AA_HUMAN	533	>sp|Q9ULF5|S39AA_HUMAN Zinc transporter ZIP10 OS=Homo sapiens OX=9606 GN=SLC39A10 PE=1 SV=2	0.00701018	1	K	WFMK(1)QNTEESTIGR	3	-1.8579	1	1.08429e+07	23.3702	9386300	1	23.1621
sp|Q8N3V7|SYNPO_HUMAN	737	>sp|Q8N3V7|SYNPO_HUMAN Synaptopodin OS=Homo sapiens OX=9606 GN=SYNPO PE=1 SV=2	8.53956e-25	1	K	MEK(1)YVIESSSHTPELAR	4	0.31766	3.39197e+07	1.8435e+07	-0.879674	9287500	1	23.1469
sp|P61764|STXB1_HUMAN	497	>sp|P61764|STXB1_HUMAN Syntaxin-binding protein 1 OS=Homo sapiens OX=9606 GN=STXBP1 PE=1 SV=1	2.44763e-05	1	K	DIMEDTIEDK(0.084)LDTK(0.916)HYPYISTR	4	-0.16494	1	1	0	9285900	1	23.1466
sp|Q9NXG2|THUM1_HUMAN	254	>sp|Q9NXG2|THUM1_HUMAN THUMP domain-containing protein 1 OS=Homo sapiens OX=9606 GN=THUMPD1 PE=1 SV=2	0.00431699	1	K	AVCCLSVVK(1)DYMLFR	3	-0.14347	1	381666	18.542	9239900	1	23.1394
sp|O43657|TSN6_HUMAN	179	>sp|O43657|TSN6_HUMAN Tetraspanin-6 OS=Homo sapiens OX=9606 GN=TSPAN6 PE=1 SV=1	0.00407387	1	K	SCCK(1)LEDCTPQR	3	0.30641	1.68842e+06	1	-20.6872	9226400	1	23.1373
sp|P33316|DUT_HUMAN	179	>sp|P33316|DUT_HUMAN Deoxyuridine 5'-triphosphate nucleotidohydrolase, mitochondrial OS=Homo sapiens OX=9606 GN=DUT PE=1 SV=4	0.000494891	1	K	SGLAAK(1)HFIDVGAGVIDEDYR	3	0.86884	1.81766e+06	1.85029e+07	3.3476	9196100	1	23.1326
sp|P11171|41_HUMAN	361	>sp|P11171|41_HUMAN Protein 4.1 OS=Homo sapiens OX=9606 GN=EPB41 PE=1 SV=4	0.00318777	1	K	LAPNQTK(1)ELEEK	3	-0.11992	1	4.19586e+06	22.0005	9190500	1	23.1317
sp|Q92621|NU205_HUMAN	41	>sp|Q92621|NU205_HUMAN Nuclear pore complex protein Nup205 OS=Homo sapiens OX=9606 GN=NUP205 PE=1 SV=3	0.00128525	1	K	RQPEAVHLLDK(0.996)ILK(0.004)	4	-0.23686	1	1	0	9186700	1	23.1311
sp|O60312|AT10A_HUMAN	632	>sp|O60312|AT10A_HUMAN Probable phospholipid-transporting ATPase VA OS=Homo sapiens OX=9606 GN=ATP10A PE=2 SV=2	0.000140623	1	K	FTPSCLTSGCSSIGSLAANK(0.749)SSHK(0.251)	4	-0.62796	1	1	0	9181300	1	23.1303
sp|P30041|PRDX6_HUMAN	199	>sp|P30041|PRDX6_HUMAN Peroxiredoxin-6 OS=Homo sapiens OX=9606 GN=PRDX6 PE=1 SV=3	4.61848e-07	1	K	DGDSVMVLPTIPEEEAK(0.803)K(0.197)	3	-4.1011	1	1	0	9176900	1	23.1296
sp|Q8IZA0|K319L_HUMAN	982	>sp|Q8IZA0|K319L_HUMAN Dyslexia-associated protein KIAA0319-like protein OS=Homo sapiens OX=9606 GN=KIAA0319L PE=1 SV=2	0.000263858	1	K	ILDATDQESLELK(1)PTSR	3	-0.50902	1.7788e+07	1.25222e+07	-0.50641	9170500	1	23.1286
sp|O75886|STAM2_HUMAN	156	>sp|O75886|STAM2_HUMAN Signal transducing adapter molecule 2 OS=Homo sapiens OX=9606 GN=STAM2 PE=1 SV=1	5.61775e-23	1	K	SMKEEGITFPPAGSQTVSAAAK(0.963)NGTSSNK(0.037)	4	-2.6223	2.85041e+07	1.49569e+07	-0.930358	9169200	1	23.1284
sp|Q13404|UB2V1_HUMAN	74	>sp|Q13404|UB2V1_HUMAN Ubiquitin-conjugating enzyme E2 variant 1 OS=Homo sapiens OX=9606 GN=UBE2V1 PE=1 SV=2	0.00022341	1	K	IECGPK(1)YPEAPPFVR	3	0.7144	3.1933e+07	1.25716e+07	-1.34488	9165100	1	23.1277
sp|O95782|AP2A1_HUMAN	165	>sp|O95782|AP2A1_HUMAN AP-2 complex subunit alpha-1 OS=Homo sapiens OX=9606 GN=AP2A1 PE=1 SV=3	0.000143169	1	K	ILVAGDSMDSVK(1)QSAALCLLR	3	0.92025	5.84491e+06	1.17237e+07	1.00418	9155200	1	23.1262
sp|Q8WU67|ABHD3_HUMAN	332	>sp|Q8WU67|ABHD3_HUMAN Phospholipase ABHD3 OS=Homo sapiens OX=9606 GN=ABHD3 PE=1 SV=2	3.13339e-06	1	K	LK(1)SVGIPVLCLNSVDDVFSPSHAIPIETAK	4	1.7298	1	1	0	9094000	1	23.1165
sp|Q86YT6|MIB1_HUMAN	481	>sp|Q86YT6|MIB1_HUMAN E3 ubiquitin-protein ligase MIB1 OS=Homo sapiens OX=9606 GN=MIB1 PE=1 SV=1	9.70445e-08	1	K	RPDVDVNGQCAGHTAMQAASQNGHVDILK(0.769)LLLK(0.231)	5	0.14918	1	1	0	8984800	1	23.0991
sp|Q12866|MERTK_HUMAN	607	>sp|Q12866|MERTK_HUMAN Tyrosine-protein kinase Mer OS=Homo sapiens OX=9606 GN=MERTK PE=1 SV=2	0.000698436	1	K	ILGEGEFGSVMEGNLK(0.942)QEDGTSLK(0.058)	3	-0.42486	1	1	0	8944700	1	23.0926
sp|Q7Z699|SPRE1_HUMAN	301	>sp|Q7Z699|SPRE1_HUMAN Sprouty-related, EVH1 domain-containing protein 1 OS=Homo sapiens OX=9606 GN=SPRED1 PE=1 SV=2	1.48517e-05	1	K	KSDYLYSCGDETK(0.997)LSSPK(0.003)	3	0.34293	1	1	0	8928400	1	23.09
sp|P99999|CYC_HUMAN	40	>sp|P99999|CYC_HUMAN Cytochrome c OS=Homo sapiens OX=9606 GN=CYCS PE=1 SV=2	0.00167312	1	K	K(1)TGQAPGYSYTAANK	3	-0.70486	4.39954e+06	1	-22.0689	8864000	1	23.0795
sp|P07900|HS90A_HUMAN	446	>sp|P07900|HS90A_HUMAN Heat shock protein HSP 90-alpha OS=Homo sapiens OX=9606 GN=HSP90AA1 PE=1 SV=5	0.0275642	1	K	FYEQFSK(0.424)NIK(0.576)	2	1.2347	1	1	0	8744400	1	23.0599
sp|P43243|MATR3_HUMAN	515	>sp|P43243|MATR3_HUMAN Matrin-3 OS=Homo sapiens OX=9606 GN=MATR3 PE=1 SV=2	5.29015e-05	1	K	VIHLSNLPHSGYSDSAVLK(0.999)LAEPYGK(0.001)	4	0.72475	8.23978e+06	1	-22.9742	8680300	1	23.0493
sp|O15439|MRP4_HUMAN	515	>sp|O15439|MRP4_HUMAN Multidrug resistance-associated protein 4 OS=Homo sapiens OX=9606 GN=ABCC4 PE=1 SV=3	1.45077e-08	1	K	K(1)DLQLLEDGDLTVIGDR	3	0.49306	1	1	0	8634700	1	23.0417
sp|Q8IUH4|ZDH13_HUMAN	33	>sp|Q8IUH4|ZDH13_HUMAN Palmitoyltransferase ZDHHC13 OS=Homo sapiens OX=9606 GN=ZDHHC13 PE=1 SV=3	0.000132673	1	K	YGICAHENK(1)ELANAR	3	0.070645	3.48788e+06	1	-21.7339	8633700	1	23.0415
sp|P55327|TPD52_HUMAN	185	>sp|P55327|TPD52_HUMAN Tumor protein D52 OS=Homo sapiens OX=9606 GN=TPD52 PE=1 SV=2	0.0343745	1	K	SFEEK(0.006)VENLK(0.974)SK(0.02)	3	0.46455	4.07295e+06	1	-21.9576	8632400	1	23.0413
sp|Q99613|EIF3C_HUMAN;sp|B5ME19|EIFCL_HUMAN	643;644	>sp|Q99613|EIF3C_HUMAN Eukaryotic translation initiation factor 3 subunit C OS=Homo sapiens OX=9606 GN=EIF3C PE=1 SV=1;>sp|B5ME19|EIFCL_HUMAN Eukaryotic translation initiation factor 3 subunit C-like protein OS=Homo sapiens OX=9606 GN=EIF3CL PE=3 SV=1	0.0483389		K	AK(1)ELLGQGLLLR	3	-0.64402	1	1	0	8621600	1	23.0395
sp|Q14764|MVP_HUMAN	444	>sp|Q14764|MVP_HUMAN Major vault protein OS=Homo sapiens OX=9606 GN=MVP PE=1 SV=4	0.00027031	1	K	DTAK(1)SLQPLAPR	3	-0.60029	2.10612e+07	1.80419e+07	-0.223232	8616300	1	23.0386
sp|P47914|RL29_HUMAN	134	>sp|P47914|RL29_HUMAN 60S ribosomal protein L29 OS=Homo sapiens OX=9606 GN=RPL29 PE=1 SV=2	0.00204055	1	K	DQTK(1)AQAAAPASVPAQAPK	3	0.21516	1.38822e+07	1	-23.7267	8593600	1	23.0348
sp|Q9BRQ3|NUD22_HUMAN	60	>sp|Q9BRQ3|NUD22_HUMAN Nucleoside diphosphate-linked moiety X motif 22 OS=Homo sapiens OX=9606 GN=NUDT22 PE=1 SV=3	0.00167233	1	K	AQPWLFDAPK(1)FR	3	0.65002	3.69833e+07	2.89012e+07	-0.355742	8487400	1	23.0169
sp|Q8WUM4|PDC6I_HUMAN	640	>sp|Q8WUM4|PDC6I_HUMAN Programmed cell death 6-interacting protein OS=Homo sapiens OX=9606 GN=PDCD6IP PE=1 SV=1	0.00229354	1	K	MK(1)QSNNEANLREEVLK	3	0.77829	1.99813e+07	1.8151e+07	-0.138598	8466800	1	23.0134
sp|Q14896|MYPC3_HUMAN	1155	>sp|Q14896|MYPC3_HUMAN Myosin-binding protein C, cardiac-type OS=Homo sapiens OX=9606 GN=MYBPC3 PE=1 SV=4	0.00979709	1	K	AATTK(1)EPVFIPR	3	-0.72558	1	1	0	8455500	1	23.0115
sp|O00506|STK25_HUMAN	43	>sp|O00506|STK25_HUMAN Serine/threonine-protein kinase 25 OS=Homo sapiens OX=9606 GN=STK25 PE=1 SV=1	0.00161173	1	K	GIDNHTK(1)EVVAIK	3	0.8088	1	1	0	8375400	1	22.9977
sp|Q8NC42|RN149_HUMAN	256	>sp|Q8NC42|RN149_HUMAN E3 ubiquitin-protein ligase RNF149 OS=Homo sapiens OX=9606 GN=RNF149 PE=2 SV=2	0.000252292	1	K	VIGQLLLHTVK(0.95)HGEK(0.05)	4	-0.24444	3.21441e+06	3.03347e+06	-0.0835849	8367000	1	22.9963
sp|Q9NPD3|EXOS4_HUMAN	95	>sp|Q9NPD3|EXOS4_HUMAN Exosome complex component RRP41 OS=Homo sapiens OX=9606 GN=EXOSC4 PE=1 SV=3	0.00147163	1	K	K(1)SCEMGLQLR	3	1.6305	1	1	0	8342400	1	22.992
sp|Q709C8|VP13C_HUMAN	1380	>sp|Q709C8|VP13C_HUMAN Vacuolar protein sorting-associated protein 13C OS=Homo sapiens OX=9606 GN=VPS13C PE=1 SV=1	8.25584e-37	1	K	ILTENLCEGTEDLDK(0.981)VK(0.019)PR	4	-1.294	9.12277e+07	5.65316e+07	-0.690413	8212600	1	22.9694
sp|Q13435|SF3B2_HUMAN	529	>sp|Q13435|SF3B2_HUMAN Splicing factor 3B subunit 2 OS=Homo sapiens OX=9606 GN=SF3B2 PE=1 SV=2	0.00158409	1	K	GIEKPPFELPDFIK(1)R	4	0.30289	1	1	0	8179300	1	22.9635
sp|Q9UNS2|CSN3_HUMAN	406	>sp|Q9UNS2|CSN3_HUMAN COP9 signalosome complex subunit 3 OS=Homo sapiens OX=9606 GN=COPS3 PE=1 SV=3	2.07373e-12	1	K	AMDQEITVNPQFVQK(1)SMGSQEDDSGNKPSSYS	3	-0.83034	1	4.04706e+06	21.9484	8132800	1	22.9553
sp|P20700|LMNB1_HUMAN	157	>sp|P20700|LMNB1_HUMAN Lamin-B1 OS=Homo sapiens OX=9606 GN=LMNB1 PE=1 SV=2	0.00783966		K	DAALATALGDK(0.442)K(0.558)	2	-0.43866	1	1	0	8050800	1	22.9407
sp|Q8TDZ2|MICA1_HUMAN	488	>sp|Q8TDZ2|MICA1_HUMAN [F-actin]-monooxygenase MICAL1 OS=Homo sapiens OX=9606 GN=MICAL1 PE=1 SV=2	0.000624481	1	K	DLYDVLAK(1)EPVQR	2	-2.3209	1	1	0	7942800	1	22.9212
sp|Q9UDY4|DNJB4_HUMAN	73	>sp|Q9UDY4|DNJB4_HUMAN DnaJ homolog subfamily B member 4 OS=Homo sapiens OX=9606 GN=DNAJB4 PE=1 SV=1	1.11416e-09	1	K	EIYDQFGEEGLK(1)GGAGGTDGQGGTFR	3	-0.031213	1.85258e+07	1.63739e+07	-0.178144	7926700	1	22.9183
sp|P62249|RS16_HUMAN	4	>sp|P62249|RS16_HUMAN 40S ribosomal protein S16 OS=Homo sapiens OX=9606 GN=RPS16 PE=1 SV=2	0.000475746	1	K	PSK(1)GPLQSVQVFGR	3	0.43184	1	1	0	7924800	1	22.9179
sp|P40855|PEX19_HUMAN	138	>sp|P40855|PEX19_HUMAN Peroxisomal biogenesis factor 19 OS=Homo sapiens OX=9606 GN=PEX19 PE=1 SV=1	1.62363e-05	1	K	ETLSGLAK(1)NATDLQNSSMSEEELTK	3	0.52851	1	3.93253e+06	21.907	7915500	1	22.9162
sp|P14866|HNRPL_HUMAN	455	>sp|P14866|HNRPL_HUMAN Heterogeneous nuclear ribonucleoprotein L OS=Homo sapiens OX=9606 GN=HNRNPL PE=1 SV=2	2.4925e-10	1	K	LNVCVSK(1)QPAIMPGQSYGLEDGSCSYKDFSESR	4	-2.2064	1	1	0	7906900	1	22.9147
sp|Q9Y666|S12A7_HUMAN	1046	>sp|Q9Y666|S12A7_HUMAN Solute carrier family 12 member 7 OS=Homo sapiens OX=9606 GN=SLC12A7 PE=1 SV=3	0.000733911	1	K	SQDAQLVLLNMPGPPK(1)NR	3	0.23192	1	1	0	7829200	1	22.9004
sp|P62873|GBB1_HUMAN	209	>sp|P62873|GBB1_HUMAN Guanine nucleotide-binding protein G(I)/G(S)/G(T) subunit beta-1 OS=Homo sapiens OX=9606 GN=GNB1 PE=1 SV=3	2.16914e-06	1	K	LFVSGACDASAK(1)LWDVR	3	-0.2939	2.68566e+07	2.26293e+07	-0.247082	7819400	1	22.8986
sp|Q8TDW7|FAT3_HUMAN	2027	>sp|Q8TDW7|FAT3_HUMAN Protocadherin Fat 3 OS=Homo sapiens OX=9606 GN=FAT3 PE=2 SV=2	0.0114212	1	K	YSILNPGNK(0.448)FK(0.552)	3	-3.8789	1	1	0	7805000	1	22.896
sp|P55854|SUMO3_HUMAN;sp|P61956|SUMO2_HUMAN	41;42	>sp|P55854|SUMO3_HUMAN Small ubiquitin-related modifier 3 OS=Homo sapiens OX=9606 GN=SUMO3 PE=1 SV=2;>sp|P61956|SUMO2_HUMAN Small ubiquitin-related modifier 2 OS=Homo sapiens OX=9606 GN=SUMO2 PE=1 SV=3	0.0276706	1	K	HTPLSK(0.998)LMK(0.002)	2	0.38083	1	1	0	7802600	1	22.8955
sp|Q15345|LRC41_HUMAN	375	>sp|Q15345|LRC41_HUMAN Leucine-rich repeat-containing protein 41 OS=Homo sapiens OX=9606 GN=LRRC41 PE=1 SV=3	3.08488e-14	1	K	SPSAPAATSSASSSTSSYK(1)R	3	0.94664	1	1	0	7751000	1	22.886
sp|O60684|IMA7_HUMAN;sp|P52294|IMA5_HUMAN	134;136	>sp|O60684|IMA7_HUMAN Importin subunit alpha-7 OS=Homo sapiens OX=9606 GN=KPNA6 PE=1 SV=1;>sp|P52294|IMA5_HUMAN Importin subunit alpha-5 OS=Homo sapiens OX=9606 GN=KPNA1 PE=1 SV=3	0.0480577		K	FVEFLK(1)R	2	1.388	1	1	0	7743600	1	22.8846
sp|Q15075|EEA1_HUMAN	1029	>sp|Q15075|EEA1_HUMAN Early endosome antigen 1 OS=Homo sapiens OX=9606 GN=EEA1 PE=1 SV=2	7.64307e-05	1	K	SQETFK(1)QLQSDFYGR	3	1.8267	1.82537e+07	5.36565e+06	-1.76636	7737700	1	22.8835
sp|P11940|PABP1_HUMAN;sp|Q9H361|PABP3_HUMAN	231;231	>sp|P11940|PABP1_HUMAN Polyadenylate-binding protein 1 OS=Homo sapiens OX=9606 GN=PABPC1 PE=1 SV=2;>sp|Q9H361|PABP3_HUMAN Polyadenylate-binding protein 3 OS=Homo sapiens OX=9606 GN=PABPC3 PE=1 SV=2	0.0166498	1	K	SK(1)GFGFVSFER	3	-2.6239	1	1	0	7694600	1	22.8754
sp|Q13772|NCOA4_HUMAN	424	>sp|Q13772|NCOA4_HUMAN Nuclear receptor coactivator 4 OS=Homo sapiens OX=9606 GN=NCOA4 PE=1 SV=1	6.49644e-06	1	K	ANEPCTSFAECVCDENCEK(0.996)EALYK(0.004)	3	-1.866	1	9.55482e+06	23.1878	7657200	1	22.8684
sp|P34932|HSP74_HUMAN	638	>sp|P34932|HSP74_HUMAN Heat shock 70 kDa protein 4 OS=Homo sapiens OX=9606 GN=HSPA4 PE=1 SV=4	0.00387081	1	K	DKLSGEYEK(0.983)FVSEDDRNSFTLK(0.017)	4	1.9519	1	1	0	7636800	1	22.8645
sp|Q02878|RL6_HUMAN	237	>sp|Q02878|RL6_HUMAN 60S ribosomal protein L6 OS=Homo sapiens OX=9606 GN=RPL6 PE=1 SV=3	4.17652e-51	1	K	HQEGEIFDTEK(0.983)EK(0.017)YEITEQR	3	1.3963	1.38137e+08	2.77179e+06	-5.63914	7589000	1	22.8555
sp|P13591|NCAM1_HUMAN	852	>sp|P13591|NCAM1_HUMAN Neural cell adhesion molecule 1 OS=Homo sapiens OX=9606 GN=NCAM1 PE=1 SV=3	0.00857311	1	K	TVPNDATQTK(0.922)ENESK(0.078)A	3	1.1725	1	1	0	7584400	1	22.8546
sp|Q9Y5S1|TRPV2_HUMAN	29	>sp|Q9Y5S1|TRPV2_HUMAN Transient receptor potential cation channel subfamily V member 2 OS=Homo sapiens OX=9606 GN=TRPV2 PE=1 SV=1	1.32386e-07	1	K	LETLDGGQEDGSEADRGK(1)LDFGSGLPPMESQFQGEDR	4	0.047094	1	1	0	7579000	1	22.8536
sp|O43707|ACTN4_HUMAN;sp|P12814|ACTN1_HUMAN;sp|Q08043|ACTN3_HUMAN;sp|P35609|ACTN2_HUMAN	50;31;45;38	>sp|O43707|ACTN4_HUMAN Alpha-actinin-4 OS=Homo sapiens OX=9606 GN=ACTN4 PE=1 SV=2;>sp|P12814|ACTN1_HUMAN Alpha-actinin-1 OS=Homo sapiens OX=9606 GN=ACTN1 PE=1 SV=2;>sp|Q08043|ACTN3_HUMAN Alpha-actinin-3 OS=Homo sapiens OX=9606 GN=ACTN3 PE=1 SV=2;>sp|P35609	0.00247036	1	K	DLLLDPAWEK(1)QQR	3	0.77546	5.00921e+06	1	-22.2562	7546800	1	22.8474
sp|Q9UN86|G3BP2_HUMAN	50	>sp|Q9UN86|G3BP2_HUMAN Ras GTPase-activating protein-binding protein 2 OS=Homo sapiens OX=9606 GN=G3BP2 PE=1 SV=2	1.39102e-05	1	K	NSSYVHGGVDASGK(1)PQEAVYGQNDIHHK	4	-0.37772	1	1	0	7518700	1	22.8421
sp|Q92922|SMRC1_HUMAN	590	>sp|Q92922|SMRC1_HUMAN SWI/SNF complex subunit SMARCC1 OS=Homo sapiens OX=9606 GN=SMARCC1 PE=1 SV=3	0.00637934	1	K	NK(0.591)EK(0.409)PVDLQNFGLR	3	0.17172	2.18456e+06	3.64677e+06	0.739274	7488400	1	22.8362
sp|O75694|NU155_HUMAN	906	>sp|O75694|NU155_HUMAN Nuclear pore complex protein Nup155 OS=Homo sapiens OX=9606 GN=NUP155 PE=1 SV=1	2.13486e-11	1	K	EYQK(1)ISNQVDLSNVCAQYR	3	0.22311	1.64155e+07	2.40926e+07	0.55353	7459700	1	22.8307
sp|Q14444|CAPR1_HUMAN	128	>sp|Q14444|CAPR1_HUMAN Caprin-1 OS=Homo sapiens OX=9606 GN=CAPRIN1 PE=1 SV=2	0.00183379	1	K	SFMALSQDIQK(0.362)TIK(0.638)	3	0.042278	1	1	0	7422800	1	22.8235
sp|P51665|PSMD7_HUMAN	180	>sp|P51665|PSMD7_HUMAN 26S proteasome non-ATPase regulatory subunit 7 OS=Homo sapiens OX=9606 GN=PSMD7 PE=1 SV=2	8.16323e-24	1	K	DIK(1)DTTVGTLSQR	2	1.4543	1.3244e+08	7.67561e+07	-0.786989	7405300	1	22.8201
sp|P48444|COPD_HUMAN	44	>sp|P48444|COPD_HUMAN Coatomer subunit delta OS=Homo sapiens OX=9606 GN=ARCN1 PE=1 SV=1	0.00068197	1	K	LMNTGK(1)QHTFVETESVR	3	1.5523	1	1	0	7385900	1	22.8163
sp|O00165|HAX1_HUMAN	205	>sp|O00165|HAX1_HUMAN HCLS1-associated protein X-1 OS=Homo sapiens OX=9606 GN=HAX1 PE=1 SV=2	3.52304e-07	1	K	TREDNDLDSQVSQEGLGPVLQPQPK(0.741)SYFK(0.259)	4	0.29023	1	1	0	7380100	1	22.8152
sp|Q12769|NU160_HUMAN	939	>sp|Q12769|NU160_HUMAN Nuclear pore complex protein Nup160 OS=Homo sapiens OX=9606 GN=NUP160 PE=1 SV=3	0.000215903	1	K	ALECFCQAASEVGK(1)EEFLDR	3	0.35852	3.71157e+06	1	-21.8236	7340100	1	22.8074
sp|P30041|PRDX6_HUMAN	97	>sp|P30041|PRDX6_HUMAN Peroxiredoxin-6 OS=Homo sapiens OX=9606 GN=PRDX6 PE=1 SV=3	0.000278534	1	K	DINAYNCEEPTEK(1)LPFPIIDDR	3	-1.2029	1	3.95331e+06	21.9146	7314000	1	22.8022
sp|P52789|HXK2_HUMAN	885	>sp|P52789|HXK2_HUMAN Hexokinase-2 OS=Homo sapiens OX=9606 GN=HK2 PE=1 SV=2	0.000584139	1	K	DLAPK(1)CDVSFLQSEDGSGK	3	-0.92376	1	1	0	7171000	1	22.7737
sp|P17544|ATF7_HUMAN;sp|P15336|ATF2_HUMAN	400;409	>sp|P17544|ATF7_HUMAN Cyclic AMP-dependent transcription factor ATF-7 OS=Homo sapiens OX=9606 GN=ATF7 PE=1 SV=2;>sp|P15336|ATF2_HUMAN Cyclic AMP-dependent transcription factor ATF-2 OS=Homo sapiens OX=9606 GN=ATF2 PE=1 SV=4	0.0354722		K	NEVAQLK(0.98)QLLLAHK(0.02)	3	0.79674	1	1	0	7085500	1	22.7564
sp|Q8NFH5|NUP53_HUMAN	83	>sp|Q8NFH5|NUP53_HUMAN Nucleoporin NUP53 OS=Homo sapiens OX=9606 GN=NUP35 PE=1 SV=1	0.00171091	1	K	SPLLAGGSPPQPVVPAHK(0.783)DK(0.217)	3	-1.5482	1	1	0	7028400	1	22.7448
sp|P08758|ANXA5_HUMAN	301	>sp|P08758|ANXA5_HUMAN Annexin A5 OS=Homo sapiens OX=9606 GN=ANXA5 PE=1 SV=2	0.000138467	1	K	NFATSLYSMIK(1)GDTSGDYKK	4	-1.5931	1	1	0	7022500	1	22.7436
sp|Q16881|TRXR1_HUMAN	245	>sp|Q16881|TRXR1_HUMAN Thioredoxin reductase 1, cytoplasmic OS=Homo sapiens OX=9606 GN=TXNRD1 PE=1 SV=3	0.000816878	1	K	VEETVK(1)HDWDR	3	-0.6293	1.97382e+07	2.32056e+07	0.233481	6996900	1	22.7383
sp|P62195|PRS8_HUMAN	222	>sp|P62195|PRS8_HUMAN 26S proteasome regulatory subunit 8 OS=Homo sapiens OX=9606 GN=PSMC5 PE=1 SV=1	0.00192082	1	K	VSGSELVQK(1)FIGEGAR	3	0.5088	1	1	0	6951800	1	22.729
sp|P36897|TGFR1_HUMAN	391	>sp|P36897|TGFR1_HUMAN TGF-beta receptor type-1 OS=Homo sapiens OX=9606 GN=TGFBR1 PE=1 SV=1	0.0020355		K	YMAPEVLDDSINMK(0.924)HFESFK(0.076)R	5	-0.62262	1	1	0	6877200	1	22.7134
sp|Q6UWE0|LRSM1_HUMAN	564	>sp|Q6UWE0|LRSM1_HUMAN E3 ubiquitin-protein ligase LRSAM1 OS=Homo sapiens OX=9606 GN=LRSAM1 PE=1 SV=1	0.00163458	1	K	LLNQK(0.27)PLSLK(0.73)LQEEGMER	4	0.75971	1	1	0	6876900	1	22.7133
sp|Q8WUM4|PDC6I_HUMAN	707	>sp|Q8WUM4|PDC6I_HUMAN Programmed cell death 6-interacting protein OS=Homo sapiens OX=9606 GN=PDCD6IP PE=1 SV=1	5.64717e-19	1	K	DELLK(1)DLQQSIAR	3	-0.23688	1.46865e+07	8.26267e+06	-0.829809	6848400	1	22.7073
sp|P61026|RAB10_HUMAN	102	>sp|P61026|RAB10_HUMAN Ras-related protein Rab-10 OS=Homo sapiens OX=9606 GN=RAB10 PE=1 SV=1	0.00607551	1	K	SFENISK(1)WLR	3	-0.34086	2.22051e+07	1.24286e+07	-0.83723	6842900	1	22.7062
sp|Q92945|FUBP2_HUMAN	169	>sp|Q92945|FUBP2_HUMAN Far upstream element-binding protein 2 OS=Homo sapiens OX=9606 GN=KHSRP PE=1 SV=4	0.00037475	1	K	GGEQINK(1)IQQDSGCK	3	-1.1051	1.17074e+07	1.17885e+07	0.00996019	6840600	1	22.7057
sp|Q8NFA0|UBP32_HUMAN	589	>sp|Q8NFA0|UBP32_HUMAN Ubiquitin carboxyl-terminal hydrolase 32 OS=Homo sapiens OX=9606 GN=USP32 PE=1 SV=1	0.000753479	1	K	NSK(1)TDIPELELFPR	3	1.4173	5.36346e+06	2.46719e+06	-1.12029	6731500	1	22.6825
sp|Q9Y5V3|MAGD1_HUMAN	605	>sp|Q9Y5V3|MAGD1_HUMAN Melanoma-associated antigen D1 OS=Homo sapiens OX=9606 GN=MAGED1 PE=1 SV=3	0.046625		K	K(1)LLTYEFVK	2	-1.0151	1	1	0	6729300	1	22.682
sp|Q14980|NUMA1_HUMAN	1330	>sp|Q14980|NUMA1_HUMAN Nuclear mitotic apparatus protein 1 OS=Homo sapiens OX=9606 GN=NUMA1 PE=1 SV=2	0.00076539	1	K	AEELGQELK(1)AWQEK	3	-0.38211	4.72162e+06	4.38612e+06	-0.106337	6648200	1	22.6645
sp|Q8WVC6|DCAKD_HUMAN	168	>sp|Q8WVC6|DCAKD_HUMAN Dephospho-CoA kinase domain-containing protein OS=Homo sapiens OX=9606 GN=DCAKD PE=1 SV=1	0.00179381	1	K	INAQLPLTDK(1)AR	3	0.24038	1	1	0	6505800	1	22.6333
sp|O75165|DJC13_HUMAN	741	>sp|O75165|DJC13_HUMAN DnaJ homolog subfamily C member 13 OS=Homo sapiens OX=9606 GN=DNAJC13 PE=1 SV=5	0.0152807	1	K	ENINQK(1)PVVLR	3	-0.80071	2.88388e+07	1	-24.7815	6503700	1	22.6328
sp|P55884|EIF3B_HUMAN	324	>sp|P55884|EIF3B_HUMAN Eukaryotic translation initiation factor 3 subunit B OS=Homo sapiens OX=9606 GN=EIF3B PE=1 SV=3	0.00159266	1	K	TSIFWNDVK(1)DPVSIEER	3	-2.0515	1	1	0	6492400	1	22.6303
sp|Q9Y3E5|PTH2_HUMAN	134	>sp|Q9Y3E5|PTH2_HUMAN Peptidyl-tRNA hydrolase 2, mitochondrial OS=Homo sapiens OX=9606 GN=PTRH2 PE=1 SV=1	0.000117642		K	APDEETLIALLAHAK(1)MLGLTVSLIQDAGR	4	1.401	1	1	0	6470900	1	22.6255
sp|Q9UIW2|PLXA1_HUMAN	1521	>sp|Q9UIW2|PLXA1_HUMAN Plexin-A1 OS=Homo sapiens OX=9606 GN=PLXNA1 PE=1 SV=3	2.09825e-14	1	K	TLTLNCVNPENENAPEVPVK(1)GLDCDTVTQAK	3	1.4483	1	1	0	6470200	1	22.6254
sp|O95155|UBE4B_HUMAN	951	>sp|O95155|UBE4B_HUMAN Ubiquitin conjugation factor E4 B OS=Homo sapiens OX=9606 GN=UBE4B PE=1 SV=1	0.00231045	1	K	TQK(1)FFEMIENHPLSTK	3	0.050831	1	4.11961e+06	21.9741	6388300	1	22.607
sp|Q9Y6M1|IF2B2_HUMAN	497	>sp|Q9Y6M1|IF2B2_HUMAN Insulin-like growth factor 2 mRNA-binding protein 2 OS=Homo sapiens OX=9606 GN=IGF2BP2 PE=1 SV=2	0.00611868	1	K	LK(1)EENFFNPK	3	-1.1053	5.59909e+07	4.38252e+07	-0.353431	6364300	1	22.6016
sp|Q9NP80|PLPL8_HUMAN	744	>sp|Q9NP80|PLPL8_HUMAN Calcium-independent phospholipase A2-gamma OS=Homo sapiens OX=9606 GN=PNPLA8 PE=1 SV=1	0.0111555	1	K	YIERNEQK(0.843)MK(0.157)	3	1.6343	1	8.72038e+06	23.056	6344300	1	22.597
sp|Q8NEZ5|FBX22_HUMAN	300	>sp|Q8NEZ5|FBX22_HUMAN F-box only protein 22 OS=Homo sapiens OX=9606 GN=FBXO22 PE=1 SV=1	4.64177e-06	1	K	IQSATVLLNEDVSDEK(1)TAEAAMQR	3	1.2242	1	1	0	6337000	1	22.5954
sp|P49790|NU153_HUMAN	1011	>sp|P49790|NU153_HUMAN Nuclear pore complex protein Nup153 OS=Homo sapiens OX=9606 GN=NUP153 PE=1 SV=2	1.95779e-20	1	K	FGLSSGLSNPVSLTPFQFGVSNLGQEEK(0.415)K(0.568)EELPK(0.017)	4	1.1696	1.05872e+06	1	-20.0139	6333900	1	22.5947
sp|Q9NUY8|TBC23_HUMAN	504	>sp|Q9NUY8|TBC23_HUMAN TBC1 domain family member 23 OS=Homo sapiens OX=9606 GN=TBC1D23 PE=1 SV=3	2.12603e-08		K	EK(1)VISFIENTSTPVDR	3	1.3403	1.05932e+07	8.97363e+06	-0.239371	6331000	1	22.594
sp|P63167|DYL1_HUMAN	9	>sp|P63167|DYL1_HUMAN Dynein light chain 1, cytoplasmic OS=Homo sapiens OX=9606 GN=DYNLL1 PE=1 SV=1	1.37749e-08	1	K	AVIK(1)NADMSEEMQQDSVECATQALEK	3	-1.4459	1	3.03326e+06	21.5324	6329700	1	22.5937
sp|Q8WV83|S35F5_HUMAN	177	>sp|Q8WV83|S35F5_HUMAN Solute carrier family 35 member F5 OS=Homo sapiens OX=9606 GN=SLC35F5 PE=1 SV=1	0.000410096	1	K	FHDLPSEK(1)PESTNIDTEKTPK	4	-0.3505	8.43116e+06	4.3783e+06	-0.94536	6317900	1	22.591
sp|P24941|CDK2_HUMAN	33	>sp|P24941|CDK2_HUMAN Cyclin-dependent kinase 2 OS=Homo sapiens OX=9606 GN=CDK2 PE=1 SV=2	0.0457645		K	LTGEVVALK(0.5)K(0.5)	2	-1.2972	1	1	0	6247400	1	22.5748
sp|P24941|CDK2_HUMAN	34	>sp|P24941|CDK2_HUMAN Cyclin-dependent kinase 2 OS=Homo sapiens OX=9606 GN=CDK2 PE=1 SV=2	0.0457645		K	LTGEVVALK(0.5)K(0.5)	2	-1.2972	1	1	0	6247400	1	22.5748
sp|P57721|PCBP3_HUMAN;sp|Q15365|PCBP1_HUMAN;sp|Q15366|PCBP2_HUMAN	55;23;23	>sp|P57721|PCBP3_HUMAN Poly(rC)-binding protein 3 OS=Homo sapiens OX=9606 GN=PCBP3 PE=2 SV=2;>sp|Q15365|PCBP1_HUMAN Poly(rC)-binding protein 1 OS=Homo sapiens OX=9606 GN=PCBP1 PE=1 SV=2;>sp|Q15366|PCBP2_HUMAN Poly(rC)-binding protein 2 OS=Homo sapiens OX=9	0.00247419	1	K	LLMHGK(0.998)EVGSIIGK(0.002)	3	-0.19503	1	1	0	6219600	1	22.5684
sp|O95271|TNKS1_HUMAN	667	>sp|O95271|TNKS1_HUMAN Tankyrase-1 OS=Homo sapiens OX=9606 GN=TNKS PE=1 SV=2	3.88212e-09	1	K	AGDLETVK(1)QLCSSQNVNCR	3	-0.29396	5.35094e+07	1.87808e+07	-1.51054	6219300	1	22.5683
sp|Q9Y5K5|UCHL5_HUMAN	206	>sp|Q9Y5K5|UCHL5_HUMAN Ubiquitin carboxyl-terminal hydrolase isozyme L5 OS=Homo sapiens OX=9606 GN=UCHL5 PE=1 SV=3	3.02647e-05	1	K	EGPIDLGACNQDDWISAVRPVIEK(1)R	4	0.44613	1	1	0	6148600	1	22.5518
sp|P52565|GDIR1_HUMAN	167	>sp|P52565|GDIR1_HUMAN Rho GDP-dissociation inhibitor 1 OS=Homo sapiens OX=9606 GN=ARHGDIA PE=1 SV=3	0.00101271	1	K	AEEYEFLTPVEEAPK(1)GMLAR	3	1.0624	1.08853e+07	5.5692e+06	-0.966836	6146900	1	22.5514
sp|Q12874|SF3A3_HUMAN	489	>sp|Q12874|SF3A3_HUMAN Splicing factor 3A subunit 3 OS=Homo sapiens OX=9606 GN=SF3A3 PE=1 SV=1	7.57597e-05	1	K	WQPDTEEEYEDSSGNVVNK(0.5)K(0.5)	3	1.3846	1	1	0	6128000	1	22.547
sp|Q12874|SF3A3_HUMAN	490	>sp|Q12874|SF3A3_HUMAN Splicing factor 3A subunit 3 OS=Homo sapiens OX=9606 GN=SF3A3 PE=1 SV=1	7.57597e-05	1	K	WQPDTEEEYEDSSGNVVNK(0.5)K(0.5)	3	1.3846	1	1	0	6128000	1	22.547
sp|P10606|COX5B_HUMAN	57	>sp|P10606|COX5B_HUMAN Cytochrome c oxidase subunit 5B, mitochondrial OS=Homo sapiens OX=9606 GN=COX5B PE=1 SV=2	0.00535174	1	K	K(1)GLDPYNVLAPK	3	-1.7401	4.52573e+06	1.11979e+06	-2.01493	6040100	1	22.5261
sp|Q16531|DDB1_HUMAN	723	>sp|Q16531|DDB1_HUMAN DNA damage-binding protein 1 OS=Homo sapiens OX=9606 GN=DDB1 PE=1 SV=1	9.55336e-09	1	K	K(1)ICYQEVSQCFGVLSSR	3	0.85178	1.02695e+07	1.05064e+07	0.0328997	6007100	1	22.5182
sp|Q8IWB7|WDFY1_HUMAN	35	>sp|Q8IWB7|WDFY1_HUMAN WD repeat and FYVE domain-containing protein 1 OS=Homo sapiens OX=9606 GN=WDFY1 PE=1 SV=1	2.72988e-06	1	K	IEGHQDAVTAALLIPK(1)EDGVITASEDR	4	0.050414	2.82349e+06	1	-21.429	5969600	1	22.5092
sp|O60664|PLIN3_HUMAN	102	>sp|O60664|PLIN3_HUMAN Perilipin-3 OS=Homo sapiens OX=9606 GN=PLIN3 PE=1 SV=3	0.000151485	1	K	GLDK(1)LEENLPILQQPTEK	3	1.0457	1	1	0	5950500	1	22.5046
sp|O75165|DJC13_HUMAN	1671	>sp|O75165|DJC13_HUMAN DnaJ homolog subfamily C member 13 OS=Homo sapiens OX=9606 GN=DNAJC13 PE=1 SV=5	1.41613e-52	1	K	GDCDK(1)TYGSEFVYSDHAK	2	-0.029394	5.55412e+07	1.19017e+08	1.09954	5901300	1	22.4926
sp|O43491|E41L2_HUMAN	24	>sp|O43491|E41L2_HUMAN Band 4.1-like protein 2 OS=Homo sapiens OX=9606 GN=EPB41L2 PE=1 SV=1	0.00294819	1	K	DSSQLGTDATK(0.719)EK(0.268)PK(0.013)	3	0.29389	1	5.83067e+06	22.4752	5869900	1	22.4849
sp|Q13200|PSMD2_HUMAN	292	>sp|Q13200|PSMD2_HUMAN 26S proteasome non-ATPase regulatory subunit 2 OS=Homo sapiens OX=9606 GN=PSMD2 PE=1 SV=3	0.00895383		K	DVVVQK(1)QMAFMLGR	3	-0.93464	1.34549e+07	1	-23.6816	5868200	1	22.4845
sp|Q96J02|ITCH_HUMAN	513	>sp|Q96J02|ITCH_HUMAN E3 ubiquitin-protein ligase Itchy homolog OS=Homo sapiens OX=9606 GN=ITCH PE=1 SV=2	0.00161023	1	K	TGK(1)SALDNGPQIAYVR	3	1.2592	1.93816e+07	1.20952e+07	-0.680258	5860300	1	22.4825
sp|P31689|DNJA1_HUMAN	338	>sp|P31689|DNJA1_HUMAN DnaJ homolog subfamily A member 1 OS=Homo sapiens OX=9606 GN=DNAJA1 PE=1 SV=2	2.10694e-05	1	K	VNFPENGFLSPDK(0.995)LSLLEK(0.005)	3	0.21092	1	1.57493e+06	20.5869	5858500	1	22.4821
sp|P07910|HNRPC_HUMAN	229	>sp|P07910|HNRPC_HUMAN Heterogeneous nuclear ribonucleoproteins C1/C2 OS=Homo sapiens OX=9606 GN=HNRNPC PE=1 SV=4	2.37309e-24	1	K	QAVEMK(0.96)NDK(0.04)SEEEQSSSSVK	3	-1.317	1.49004e+07	2.11877e+07	0.50787	5826200	1	22.4741
sp|P07910|HNRPC_HUMAN	232	>sp|P07910|HNRPC_HUMAN Heterogeneous nuclear ribonucleoproteins C1/C2 OS=Homo sapiens OX=9606 GN=HNRNPC PE=1 SV=4	8.08653e-09	1	K	QAVEMK(0.5)NDK(0.5)SEEEQSSSSVK	3	-1.2073	1.49004e+07	169954	-6.45407	5826200	1	22.4741
sp|O00165|HAX1_HUMAN	131	>sp|O00165|HAX1_HUMAN HCLS1-associated protein X-1 OS=Homo sapiens OX=9606 GN=HAX1 PE=1 SV=2	0.00124056	1	K	DSMLK(1)YPDSHQPR	3	0.053093	1	1	0	5816100	1	22.4716
sp|Q9BYM8|HOIL1_HUMAN	254	>sp|Q9BYM8|HOIL1_HUMAN RanBP-type and C3HC4-type zinc finger-containing protein 1 OS=Homo sapiens OX=9606 GN=RBCK1 PE=1 SV=2	2.43201e-20	1	K	K(1)QQQQEGNYLQHVQLDQR	3	0.33626	1.69351e+07	8.2034e+06	-1.04572	5813700	1	22.471
sp|Q9NZ45|CISD1_HUMAN	68	>sp|Q9NZ45|CISD1_HUMAN CDGSH iron-sulfur domain-containing protein 1 OS=Homo sapiens OX=9606 GN=CISD1 PE=1 SV=1	0.000224294	1	K	IVHAFDMEDLGDK(1)AVYCR	4	0.081603	1	1	0	5803900	1	22.4686
sp|Q13283|G3BP1_HUMAN;sp|Q9UN86|G3BP2_HUMAN	5;5	>sp|Q13283|G3BP1_HUMAN Ras GTPase-activating protein-binding protein 1 OS=Homo sapiens OX=9606 GN=G3BP1 PE=1 SV=1;>sp|Q9UN86|G3BP2_HUMAN Ras GTPase-activating protein-binding protein 2 OS=Homo sapiens OX=9606 GN=G3BP2 PE=1 SV=2	0.00567051	1	K	VMEK(1)PSPLLVGR	3	-1.1582	4.86775e+06	1.95783e+06	-1.314	5796200	1	22.4667
sp|P0C0S5|H2AZ_HUMAN	126	>sp|P0C0S5|H2AZ_HUMAN Histone H2A.Z OS=Homo sapiens OX=9606 GN=H2AFZ PE=1 SV=2	0.00974685	1	K	KGQQK(1)TV	2	-0.13359	1	5.75329e+06	22.456	5758900	1	22.4574
sp|Q86YT6|MIB1_HUMAN	437	>sp|Q86YT6|MIB1_HUMAN E3 ubiquitin-protein ligase MIB1 OS=Homo sapiens OX=9606 GN=MIB1 PE=1 SV=1	6.12421e-07	1	K	LFETQESGDLNEELVK(1)AAANGDVAK	3	-1.7065	1	1	0	5745900	1	22.4541
sp|P07814|SYEP_HUMAN	435	>sp|P07814|SYEP_HUMAN Bifunctional glutamate/proline--tRNA ligase OS=Homo sapiens OX=9606 GN=EPRS PE=1 SV=5	0.00757915	1	K	LNLNNTVLSK(1)R	3	2.5858	1	1	0	5704500	1	22.4437
sp|P25786|PSA1_HUMAN	243	>sp|P25786|PSA1_HUMAN Proteasome subunit alpha type-1 OS=Homo sapiens OX=9606 GN=PSMA1 PE=1 SV=1	0.00138165	1	K	K(1)AQPAQPADEPAEKADEPMEH	3	-0.32075	3.8478e+06	6.71954e+06	0.80433	5703900	1	22.4435
sp|P49790|NU153_HUMAN	1120	>sp|P49790|NU153_HUMAN Nuclear pore complex protein Nup153 OS=Homo sapiens OX=9606 GN=NUP153 PE=1 SV=2	0.000352928	1	K	QQEPVTSTSLVFGK(0.793)K(0.207)	3	1.3415	1	1	0	5638400	1	22.4269
sp|P78317|RNF4_HUMAN	168	>sp|P78317|RNF4_HUMAN E3 ubiquitin-protein ligase RNF4 OS=Homo sapiens OX=9606 GN=RNF4 PE=1 SV=1	0.000164317	1	K	DSLK(1)NANTCPTCR	3	0.12152	6.64916e+06	1	-22.6647	5624200	1	22.4232
sp|P46782|RS5_HUMAN	182	>sp|P46782|RS5_HUMAN 40S ribosomal protein S5 OS=Homo sapiens OX=9606 GN=RPS5 PE=1 SV=4	6.97172e-06	1	K	TIAECLADELINAAK(0.998)GSSNSYAIK(0.002)	3	-1.531	650319	1	-19.3108	5609800	1	22.4195
sp|P60900|PSA6_HUMAN	181	>sp|P60900|PSA6_HUMAN Proteasome subunit alpha type-6 OS=Homo sapiens OX=9606 GN=PSMA6 PE=1 SV=1	0.0126133	1	K	QTESTSFLEK(0.817)K(0.183)	2	0.6663	4.16915e+06	5.73003e+06	0.458789	5609300	1	22.4194
sp|Q92616|GCN1_HUMAN	965	>sp|Q92616|GCN1_HUMAN eIF-2-alpha kinase activator GCN1 OS=Homo sapiens OX=9606 GN=GCN1 PE=1 SV=6	9.027e-05	1	K	VGK(1)GEPGAAPLSAPAFSLVFPFLK	3	3.6272	1	1	0	5601300	1	22.4173
sp|Q9BVL2|NUP58_HUMAN	266	>sp|Q9BVL2|NUP58_HUMAN Nucleoporin p58/p45 OS=Homo sapiens OX=9606 GN=NUP58 PE=1 SV=1	0.00133653	1	K	EQK(1)QVQEEISR	3	2.9606	4.7142e+06	9.31321e+06	0.982264	5567800	1	22.4087
sp|O00161|SNP23_HUMAN	141	>sp|O00161|SNP23_HUMAN Synaptosomal-associated protein 23 OS=Homo sapiens OX=9606 GN=SNAP23 PE=1 SV=1	4.4942e-07	1	K	QPGPVTNGQLQQPTTGAASGGYIK(1)R	3	-0.21871	1	1	0	5493500	1	22.3893
sp|Q12913|PTPRJ_HUMAN	1185	>sp|Q12913|PTPRJ_HUMAN Receptor-type tyrosine-protein phosphatase eta OS=Homo sapiens OX=9606 GN=PTPRJ PE=1 SV=3	0.00363414	1	K	DFTVK(1)NIQTSESHPLR	3	0.36086	1	1	0	5473000	1	22.3839
sp|Q9Y2X9|ZN281_HUMAN	622	>sp|Q9Y2X9|ZN281_HUMAN Zinc finger protein 281 OS=Homo sapiens OX=9606 GN=ZNF281 PE=1 SV=1	5.25908e-05	1	K	SESQK(1)EDPFNIAEPR	3	0.57842	2.57679e+07	3.272e+07	0.344594	5472700	1	22.3838
sp|P49411|EFTU_HUMAN	311	>sp|P49411|EFTU_HUMAN Elongation factor Tu, mitochondrial OS=Homo sapiens OX=9606 GN=TUFM PE=1 SV=2	0.00127208	1	K	TVVTGIEMFHK(1)SLER	4	0.87891	1	1	0	5453300	1	22.3787
sp|O60486|PLXC1_HUMAN	1509	>sp|O60486|PLXC1_HUMAN Plexin-C1 OS=Homo sapiens OX=9606 GN=PLXNC1 PE=1 SV=1	7.35102e-05	1	K	DLPPLSSSEMEEFLTQESK(0.543)K(0.457)	3	0.32748	1	1	0	5429100	1	22.3723
sp|O95249|GOSR1_HUMAN	32	>sp|O95249|GOSR1_HUMAN Golgi SNAP receptor complex member 1 OS=Homo sapiens OX=9606 GN=GOSR1 PE=1 SV=1	0.00189277	1	K	LVSFSK(1)LCTSYSHSSTR	4	-0.62051	1	1	0	5404100	1	22.3656
sp|Q96T51|RUFY1_HUMAN	296	>sp|Q96T51|RUFY1_HUMAN RUN and FYVE domain-containing protein 1 OS=Homo sapiens OX=9606 GN=RUFY1 PE=1 SV=2	3.06612e-05	1	K	DVQDLDGGK(1)EHER	3	-0.045549	8.06847e+06	4.99572e+06	-0.691604	5401900	1	22.365
sp|P62826|RAN_HUMAN	38	>sp|P62826|RAN_HUMAN GTP-binding nuclear protein Ran OS=Homo sapiens OX=9606 GN=RAN PE=1 SV=3	1.08248e-06	1	K	K(1)YVATLGVEVHPLVFHTNR	3	1.3053	1	1	0	5387200	1	22.3611
sp|Q9UBL3|ASH2L_HUMAN	528	>sp|Q9UBL3|ASH2L_HUMAN Set1/Ash2 histone methyltransferase complex subunit ASH2 OS=Homo sapiens OX=9606 GN=ASH2L PE=1 SV=1	0.00468807	1	K	SYLYFEEK(0.013)DFVDK(0.73)AEK(0.258)	3	1.0431	1	1	0	5375700	1	22.358
sp|P48029|SC6A8_HUMAN	4	>sp|P48029|SC6A8_HUMAN Sodium- and chloride-dependent creatine transporter 1 OS=Homo sapiens OX=9606 GN=SLC6A8 PE=1 SV=1	0.000893312	1	K	K(1)SAENGIYSVSGDEK	2	1.892	1	1	0	5364700	1	22.3551
sp|Q709C8|VP13C_HUMAN	2155	>sp|Q709C8|VP13C_HUMAN Vacuolar protein sorting-associated protein 13C OS=Homo sapiens OX=9606 GN=VPS13C PE=1 SV=1	0.00163245	1	K	DLK(1)VLACPFLR	3	0.0088655	1.8047e+07	1	-24.1053	5349300	1	22.3509
sp|Q06830|PRDX1_HUMAN	190	>sp|Q06830|PRDX1_HUMAN Peroxiredoxin-1 OS=Homo sapiens OX=9606 GN=PRDX1 PE=1 SV=1	5.28682e-05	1	K	HGEVCPAGWKPGSDTIK(0.006)PDVQK(0.753)SK(0.24)	4	-0.48769	1.9469e+07	9.04761e+06	-1.10557	5314600	1	22.3415
sp|Q9Y2G1|MYRF_HUMAN	716	>sp|Q9Y2G1|MYRF_HUMAN Myelin regulatory factor OS=Homo sapiens OX=9606 GN=MYRF PE=1 SV=3	1.54958e-05	1	K	LDSLK(1)STGSSGAFSHAGSQFSR	4	-0.46428	7.36377e+06	7.3279e+06	-0.00704325	5292500	1	22.3355
sp|Q92890|UFD1_HUMAN	139	>sp|Q92890|UFD1_HUMAN Ubiquitin recognition factor in ER-associated degradation protein 1 OS=Homo sapiens OX=9606 GN=UFD1 PE=1 SV=3	0.000499876	1	K	FQPQSPDFLDITNPK(1)AVLENALR	3	3.3043	1	1	0	5291000	1	22.3351
sp|P05455|LA_HUMAN	86	>sp|P05455|LA_HUMAN Lupus La protein OS=Homo sapiens OX=9606 GN=SSB PE=1 SV=2	0.0224917	1	K	AELMEISEDK(0.5)TK(0.5)IR	3	0.58748	2.80879e+06	2.24307e+06	-0.324471	5262700	1	22.3274
sp|Q5TDH0|DDI2_HUMAN	77	>sp|Q5TDH0|DDI2_HUMAN Protein DDI1 homolog 2 OS=Homo sapiens OX=9606 GN=DDI2 PE=1 SV=1	8.86006e-15	1	K	QK(1)ENADPRPPVQFPNLPR	4	-0.96971	9.33511e+06	1	-23.1542	5257700	1	22.326
sp|P25686|DNJB2_HUMAN	47	>sp|P25686|DNJB2_HUMAN DnaJ homolog subfamily B member 2 OS=Homo sapiens OX=9606 GN=DNAJB2 PE=1 SV=3	0.00234253	1	K	FK(1)EVAEAYEVLSDK	3	-1.8286	3.33491e+06	6.49439e+06	0.961545	5226400	1	22.3174
sp|Q562E7|WDR81_HUMAN	1668	>sp|Q562E7|WDR81_HUMAN WD repeat-containing protein 81 OS=Homo sapiens OX=9606 GN=WDR81 PE=1 SV=2	4.14925e-05	1	K	CVAPLSSEDFFLSGSK(1)DR	3	0.22165	1	2.22815e+06	21.0874	5224600	1	22.3169
sp|P38159|RBMX_HUMAN;sp|Q96E39|RMXL1_HUMAN	63;63	>sp|P38159|RBMX_HUMAN RNA-binding motif protein, X chromosome OS=Homo sapiens OX=9606 GN=RBMX PE=1 SV=3;>sp|Q96E39|RMXL1_HUMAN RNA binding motif protein, X-linked-like-1 OS=Homo sapiens OX=9606 GN=RBMXL1 PE=1 SV=1	0.00023736	1	K	GFAFVTFESPADAK(1)DAAR	3	-1.0632	1	1.21765e+07	23.5376	5192800	1	22.3081
sp|P61978|HNRPK_HUMAN	34	>sp|P61978|HNRPK_HUMAN Heterogeneous nuclear ribonucleoprotein K OS=Homo sapiens OX=9606 GN=HNRNPK PE=1 SV=1	0.00180828	1	K	RPAEDMEEEQAFK(1)R	3	0.28012	1	1	0	5155400	1	22.2977
sp|P51784|UBP11_HUMAN	714	>sp|P51784|UBP11_HUMAN Ubiquitin carboxyl-terminal hydrolase 11 OS=Homo sapiens OX=9606 GN=USP11 PE=1 SV=3	0.000260506	1	K	K(1)QLFTLQTVNSNGTSDR	3	-0.39514	1	1	0	5147100	1	22.2953
sp|P57057|G6PT2_HUMAN	259	>sp|P57057|G6PT2_HUMAN Glucose-6-phosphate exchanger SLC37A1 OS=Homo sapiens OX=9606 GN=SLC37A1 PE=2 SV=2	2.60927e-14	1	K	CSSTLVTHSK(1)GYENGTNR	3	-0.96052	1	1	0	5128500	1	22.2901
sp|Q96AJ9|VTI1A_HUMAN	43	>sp|Q96AJ9|VTI1A_HUMAN Vesicle transport through interaction with t-SNAREs homolog 1A OS=Homo sapiens OX=9606 GN=VTI1A PE=1 SV=2	0.00352688		K	QMVANVEK(1)QLEEAK	3	-2.3297	1.19071e+07	8.74179e+06	-0.445822	5092400	1	22.2799
sp|P20700|LMNB1_HUMAN	332	>sp|P20700|LMNB1_HUMAN Lamin-B1 OS=Homo sapiens OX=9606 GN=LMNB1 PE=1 SV=2	0.0484451	1	K	IQELEDLLAK(0.452)EK(0.548)	2	1.2115	1	1	0	5080300	1	22.2765
sp|Q99613|EIF3C_HUMAN;sp|B5ME19|EIFCL_HUMAN	712;713	>sp|Q99613|EIF3C_HUMAN Eukaryotic translation initiation factor 3 subunit C OS=Homo sapiens OX=9606 GN=EIF3C PE=1 SV=1;>sp|B5ME19|EIFCL_HUMAN Eukaryotic translation initiation factor 3 subunit C-like protein OS=Homo sapiens OX=9606 GN=EIF3CL PE=3 SV=1	0.00105599	1	K	MISK(1)QFHHQLR	3	0.016631	1	642421	19.2932	5073500	1	22.2745
sp|Q7Z6Z7|HUWE1_HUMAN	1225	>sp|Q7Z6Z7|HUWE1_HUMAN E3 ubiquitin-protein ligase HUWE1 OS=Homo sapiens OX=9606 GN=HUWE1 PE=1 SV=3	1.13093e-08	1	K	MVNPTTVLESPHSLPAK(1)LPGGVQNFPQFSALR	4	0.54959	1	2.13173e+06	21.0236	5043400	1	22.266
sp|O95477|ABCA1_HUMAN	2023	>sp|O95477|ABCA1_HUMAN ATP-binding cassette sub-family A member 1 OS=Homo sapiens OX=9606 GN=ABCA1 PE=1 SV=3	0.000870173	1	K	EVGK(1)VGEWAIR	3	0.31062	8.27136e+06	1.03644e+07	0.325435	5014000	1	22.2575
sp|Q9NZ52|GGA3_HUMAN	258	>sp|Q9NZ52|GGA3_HUMAN ADP-ribosylation factor-binding protein GGA3 OS=Homo sapiens OX=9606 GN=GGA3 PE=1 SV=1	0.00217759	1	K	ELFDQCENK(1)R	2	0.31348	2.80209e+07	1	-24.74	4926000	1	22.232
sp|Q9NZI8|IF2B1_HUMAN	190	>sp|Q9NZI8|IF2B1_HUMAN Insulin-like growth factor 2 mRNA-binding protein 1 OS=Homo sapiens OX=9606 GN=IGF2BP1 PE=1 SV=2	0.000724	1	K	QGSPVAAGAPAK(1)QQQVDIPLR	3	0.053065	1	1	0	4870100	1	22.2155
sp|Q9Y5S1|TRPV2_HUMAN	744	>sp|Q9Y5S1|TRPV2_HUMAN Transient receptor potential cation channel subfamily V member 2 OS=Homo sapiens OX=9606 GN=TRPV2 PE=1 SV=1	6.922e-09	1	K	TLENPVLASPPK(1)EDEDGASEENYVPVQLLQSN	3	-0.26616	1	1	0	4858200	1	22.212
sp|Q9H7N4|SFR19_HUMAN	1123	>sp|Q9H7N4|SFR19_HUMAN Splicing factor, arginine/serine-rich 19 OS=Homo sapiens OX=9606 GN=SCAF1 PE=1 SV=3	1.8592e-05	1	K	AK(1)AQELIQATNQILSHR	3	-0.096662	1	1	0	4798300	1	22.1941
sp|Q96AE4|FUBP1_HUMAN	400	>sp|Q96AE4|FUBP1_HUMAN Far upstream element-binding protein 1 OS=Homo sapiens OX=9606 GN=FUBP1 PE=1 SV=3	1.04072e-09	1	K	GGETIK(1)SISQQSGAR	2	1.3035	1	1	0	4775800	1	22.1873
sp|P00338|LDHA_HUMAN	81	>sp|P00338|LDHA_HUMAN L-lactate dehydrogenase A chain OS=Homo sapiens OX=9606 GN=LDHA PE=1 SV=2	0.00761068	1	K	IVSGK(1)DYNVTANSK	2	1.8665	4.76965e+06	1	-22.1855	4765600	1	22.1842
sp|Q9NY27|PP4R2_HUMAN	141	>sp|Q9NY27|PP4R2_HUMAN Serine/threonine-protein phosphatase 4 regulatory subunit 2 OS=Homo sapiens OX=9606 GN=PPP4R2 PE=1 SV=3	3.11684e-07	1	K	NVMVVSCVYPSSEK(1)NNSNSLNR	3	0.64896	1.54127e+07	1.17793e+07	-0.387873	4739000	1	22.1762
sp|O43175|SERA_HUMAN	69	>sp|O43175|SERA_HUMAN D-3-phosphoglycerate dehydrogenase OS=Homo sapiens OX=9606 GN=PHGDH PE=1 SV=4	1.44843e-05	1	K	VTADVINAAEK(1)LQVVGR	3	-0.57207	1.49892e+07	8.76309e+06	-0.774414	4719300	1	22.1701
sp|Q86YD1|PTOV1_HUMAN	237	>sp|Q86YD1|PTOV1_HUMAN Prostate tumor-overexpressed gene 1 protein OS=Homo sapiens OX=9606 GN=PTOV1 PE=1 SV=1	0.000523362	1	K	K(1)QAVGPGGVNSGPVQIVNNK	3	0.9319	1	1	0	4698300	1	22.1637
sp|Q8TBC4|UBA3_HUMAN	361	>sp|Q8TBC4|UBA3_HUMAN NEDD8-activating enzyme E1 catalytic subunit OS=Homo sapiens OX=9606 GN=UBA3 PE=1 SV=2	5.02956e-07	1	K	K(1)ENCPACSQLPQNIQFSPSAK	3	0.31828	2.74955e+07	1.11361e+07	-1.30395	4687900	1	22.1605
sp|P17096|HMGA1_HUMAN	46	>sp|P17096|HMGA1_HUMAN High mobility group protein HMG-I/HMG-Y OS=Homo sapiens OX=9606 GN=HMGA1 PE=1 SV=3	1.8398e-05	1	K	KQPPVSPGTALVGSQK(0.999)EPSEVPTPK(0.001)	4	0.70039	2.78142e+07	3.51443e+07	0.337469	4651000	1	22.1491
sp|Q8NE01|CNNM3_HUMAN	489	>sp|Q8NE01|CNNM3_HUMAN Metal transporter CNNM3 OS=Homo sapiens OX=9606 GN=CNNM3 PE=1 SV=1	0.000997345	1	K	VSDDEYK(1)VTISPQLLLATQR	3	-0.98439	1	1	0	4641000	1	22.146
sp|Q9BT67|NFIP1_HUMAN	63	>sp|Q9BT67|NFIP1_HUMAN NEDD4 family-interacting protein 1 OS=Homo sapiens OX=9606 GN=NDFIP1 PE=1 SV=1	0.000141911	1	K	DESGFPK(1)PPSYNVATTLPSYDEAER	3	-1.8826	5.12826e+06	1	-22.29	4633300	1	22.1436
sp|O75674|TM1L1_HUMAN	191	>sp|O75674|TM1L1_HUMAN TOM1-like protein 1 OS=Homo sapiens OX=9606 GN=TOM1L1 PE=1 SV=2	2.76577e-52	1	K	QETAQISSNPPTSVPTAPALSSVIAPK(1)NSTVTLVPEQIGK	3	0.17469	1.12129e+07	1	-23.4187	4628500	1	22.1421
sp|Q9NZI8|IF2B1_HUMAN	538	>sp|Q9NZI8|IF2B1_HUMAN Insulin-like growth factor 2 mRNA-binding protein 1 OS=Homo sapiens OX=9606 GN=IGF2BP1 PE=1 SV=2	5.05984e-05	1	K	DQTPDENDQVIVK(1)IIGHFYASQMAQR	4	2.737	1	1	0	4626500	1	22.1415
sp|O75643|U520_HUMAN	294	>sp|O75643|U520_HUMAN U5 small nuclear ribonucleoprotein 200 kDa helicase OS=Homo sapiens OX=9606 GN=SNRNP200 PE=1 SV=2	0.00426408	1	K	ADEVLEILK(1)TASDDR	3	0.18121	1	1	0	4621600	1	22.14
sp|Q14667|K0100_HUMAN	898	>sp|Q14667|K0100_HUMAN Protein KIAA0100 OS=Homo sapiens OX=9606 GN=KIAA0100 PE=1 SV=3	0.00104931		K	LHDNYELMK(0.995)DESK(0.005)	3	-1.8869	1.43161e+07	9.10493e+06	-0.652918	4587000	1	22.1291
sp|Q49AR2|CE022_HUMAN	283	>sp|Q49AR2|CE022_HUMAN UPF0489 protein C5orf22 OS=Homo sapiens OX=9606 GN=C5orf22 PE=1 SV=2	8.22264e-05	1	K	K(1)PGTNLTEEDLVDIVDTR	3	-0.38921	1	1	0	4554200	1	22.1188
sp|P31943|HNRH1_HUMAN;sp|P55795|HNRH2_HUMAN	170;170	>sp|P31943|HNRH1_HUMAN Heterogeneous nuclear ribonucleoprotein H OS=Homo sapiens OX=9606 GN=HNRNPH1 PE=1 SV=4;>sp|P55795|HNRH2_HUMAN Heterogeneous nuclear ribonucleoprotein H2 OS=Homo sapiens OX=9606 GN=HNRNPH2 PE=1 SV=1	3.13474e-05	1	K	STGEAFVQFASQEIAEK(0.14)ALK(0.86)	3	1.7873	1	1	0	4531700	1	22.1116
sp|Q9H2M9|RBGPR_HUMAN	913	>sp|Q9H2M9|RBGPR_HUMAN Rab3 GTPase-activating protein non-catalytic subunit OS=Homo sapiens OX=9606 GN=RAB3GAP2 PE=1 SV=1	0.000676464	1	K	GNTQTSK(1)VSSLQAEPLPR	3	-1.001	8.65005e+06	1.02112e+07	0.239377	4531000	1	22.1114
sp|Q9Y666|S12A7_HUMAN	937	>sp|Q9Y666|S12A7_HUMAN Solute carrier family 12 member 7 OS=Homo sapiens OX=9606 GN=SLC12A7 PE=1 SV=3	0.00422775	1	K	SQMLK(1)QMQLSK	3	-0.77913	1	1	0	4511300	1	22.1051
sp|P30086|PEBP1_HUMAN	132	>sp|P30086|PEBP1_HUMAN Phosphatidylethanolamine-binding protein 1 OS=Homo sapiens OX=9606 GN=PEBP1 PE=1 SV=3	2.06192e-05	1	K	YVWLVYEQDRPLK(1)CDEPILSNR	4	2.3061	1	2.26087e+06	21.1084	4501700	1	22.102
sp|P11142|HSP7C_HUMAN;sp|P54652|HSP72_HUMAN	188;189	>sp|P11142|HSP7C_HUMAN Heat shock cognate 71 kDa protein OS=Homo sapiens OX=9606 GN=HSPA8 PE=1 SV=1;>sp|P54652|HSP72_HUMAN Heat shock-related 70 kDa protein 2 OS=Homo sapiens OX=9606 GN=HSPA2 PE=1 SV=1	4.21035e-12	1	K	IINEPTAAAIAYGLDK(0.439)K(0.561)	3	1.0534	1.59454e+07	1.5881e+07	-0.00584293	4492100	1	22.099
sp|P21333|FLNA_HUMAN	299	>sp|P21333|FLNA_HUMAN Filamin-A OS=Homo sapiens OX=9606 GN=FLNA PE=1 SV=4	3.77864e-05	1	K	AYGPGIEPTGNMVK(0.5)K(0.5)	3	-0.25789	1.2852e+07	2.52647e+06	-2.34679	4474600	1	22.0933
sp|P68363|TBA1B_HUMAN;sp|P68366|TBA4A_HUMAN;sp|Q71U36|TBA1A_HUMAN;sp|Q13748|TBA3C_HUMAN;sp|Q9BQE3|TBA1C_HUMAN	164;164;164;164;164	>sp|P68363|TBA1B_HUMAN Tubulin alpha-1B chain OS=Homo sapiens OX=9606 GN=TUBA1B PE=1 SV=1;>sp|P68366|TBA4A_HUMAN Tubulin alpha-4A chain OS=Homo sapiens OX=9606 GN=TUBA4A PE=1 SV=1;>sp|Q71U36|TBA1A_HUMAN Tubulin alpha-1A chain OS=Homo sapiens OX=9606 GN=TUB	0.00376094	1	K	LSVDYGK(0.384)K(0.616)	2	-0.2226	2.51829e+08	2.095e+08	-0.265496	4448400	1	22.0849
sp|Q96H20|SNF8_HUMAN	134	>sp|Q96H20|SNF8_HUMAN Vacuolar-sorting protein SNF8 OS=Homo sapiens OX=9606 GN=SNF8 PE=1 SV=1	2.04502e-09	1	K	GK(1)FAQDVSQDDLIR	2	-0.31907	7.07443e+06	7.10841e+06	0.00691313	4363500	1	22.0571
sp|P13798|ACPH_HUMAN	180	>sp|P13798|ACPH_HUMAN Acylamino-acid-releasing enzyme OS=Homo sapiens OX=9606 GN=APEH PE=1 SV=4	0.000609296	1	K	AESFFQTK(1)ALDVSASDDEIAR	3	1.3012	3.06086e+06	5.86483e+06	0.938152	4356900	1	22.0549
sp|Q5GLZ8|HERC4_HUMAN	890	>sp|Q5GLZ8|HERC4_HUMAN Probable E3 ubiquitin-protein ligase HERC4 OS=Homo sapiens OX=9606 GN=HERC4 PE=1 SV=1	1.43266e-11	1	K	ELVLNGADTAVNK(1)QNR	3	0.78307	1.0261e+07	1	-23.2907	4333900	1	22.0472
sp|Q14980|NUMA1_HUMAN	1138	>sp|Q14980|NUMA1_HUMAN Nuclear mitotic apparatus protein 1 OS=Homo sapiens OX=9606 GN=NUMA1 PE=1 SV=2	1.71435e-06	1	K	LEQQCQK(1)QQEQADSLER	3	0.56797	5.44962e+06	4.35453e+06	-0.323637	4330500	1	22.0461
sp|P36897|TGFR1_HUMAN	213	>sp|P36897|TGFR1_HUMAN TGF-beta receptor type-1 OS=Homo sapiens OX=9606 GN=TGFBR1 PE=1 SV=1	0.00641848	1	K	TIVLQESIGK(1)GR	3	0.7246	1	1	0	4313600	1	22.0405
sp|P07910|HNRPC_HUMAN;sp|O60812|HNRC1_HUMAN;sp|B2RXH8|HNRC2_HUMAN;sp|P0DMR1|HNRC4_HUMAN;sp|B7ZW38|HNRC3_HUMAN	29;29;29;29;29	>sp|P07910|HNRPC_HUMAN Heterogeneous nuclear ribonucleoproteins C1/C2 OS=Homo sapiens OX=9606 GN=HNRNPC PE=1 SV=4;>sp|O60812|HNRC1_HUMAN Heterogeneous nuclear ribonucleoprotein C-like 1 OS=Homo sapiens OX=9606 GN=HNRNPCL1 PE=1 SV=1;>sp|B2RXH8|HNRC2_HUMAN H	0.00925116		K	VFIGNLNTLVVK(0.5)K(0.5)	3	-0.12209	1	1	0	4294800	1	22.0342
sp|P07910|HNRPC_HUMAN;sp|O60812|HNRC1_HUMAN;sp|B2RXH8|HNRC2_HUMAN;sp|P0DMR1|HNRC4_HUMAN;sp|B7ZW38|HNRC3_HUMAN	30;30;30;30;30	>sp|P07910|HNRPC_HUMAN Heterogeneous nuclear ribonucleoproteins C1/C2 OS=Homo sapiens OX=9606 GN=HNRNPC PE=1 SV=4;>sp|O60812|HNRC1_HUMAN Heterogeneous nuclear ribonucleoprotein C-like 1 OS=Homo sapiens OX=9606 GN=HNRNPCL1 PE=1 SV=1;>sp|B2RXH8|HNRC2_HUMAN H	0.00925116		K	VFIGNLNTLVVK(0.5)K(0.5)	3	-0.12209	1	1	0	4294800	1	22.0342
sp|Q06210|GFPT1_HUMAN	190	>sp|Q06210|GFPT1_HUMAN Glutamine--fructose-6-phosphate aminotransferase [isomerizing] 1 OS=Homo sapiens OX=9606 GN=GFPT1 PE=1 SV=3	2.24058e-08	1	K	VIQQLEGAFALVFK(1)SVHFPGQAVGTR	4	-0.32228	1	5.65543e+06	22.4312	4267100	1	22.0248
sp|P61225|RAP2B_HUMAN	132	>sp|P61225|RAP2B_HUMAN Ras-related protein Rap-2b OS=Homo sapiens OX=9606 GN=RAP2B PE=1 SV=1	0.000328238	1	K	EVSYGEGK(1)ALAEEWSCPFMETSAK	3	-0.53749	1	1	0	4261500	1	22.0229
sp|Q96JJ3|ELMO2_HUMAN;sp|Q92556|ELMO1_HUMAN	532;539	>sp|Q96JJ3|ELMO2_HUMAN Engulfment and cell motility protein 2 OS=Homo sapiens OX=9606 GN=ELMO2 PE=1 SV=2;>sp|Q92556|ELMO1_HUMAN Engulfment and cell motility protein 1 OS=Homo sapiens OX=9606 GN=ELMO1 PE=1 SV=2	0.00239712	1	K	EK(1)IQPEILELIK	3	-0.59447	630831	527592	-0.25783	4252500	1	22.0199
sp|O75663|TIPRL_HUMAN	84	>sp|O75663|TIPRL_HUMAN TIP41-like protein OS=Homo sapiens OX=9606 GN=TIPRL PE=1 SV=2	0.000265617	1	K	CVNNYQGMLK(1)VACAEEWQESR	3	-1.0528	1	1	0	4234500	1	22.0138
sp|P35613|BASI_HUMAN	257	>sp|P35613|BASI_HUMAN Basigin OS=Homo sapiens OX=9606 GN=BSG PE=1 SV=2	6.73357e-05	1	K	SESVPPVTDWAWYK(0.992)ITDSEDK(0.008)	3	-0.51078	1	2.09304e+06	20.9972	4183100	1	21.9961
sp|Q8IVM0|CCD50_HUMAN	157	>sp|Q8IVM0|CCD50_HUMAN Coiled-coil domain-containing protein 50 OS=Homo sapiens OX=9606 GN=CCDC50 PE=1 SV=1	0.00180812	1	K	VMK(1)EAVSTPSR	3	-1.4629	3.3141e+07	3.54098e+07	0.0955319	4177300	1	21.9941
sp|Q9HCE1|MOV10_HUMAN	489	>sp|Q9HCE1|MOV10_HUMAN Putative helicase MOV-10 OS=Homo sapiens OX=9606 GN=MOV10 PE=1 SV=2	0.0130808	1	K	DVPLLPSDVK(0.831)LK(0.169)	3	0.0090586	8.85061e+06	4.74165e+06	-0.900387	4138000	1	21.9805
sp|P28340|DPOD1_HUMAN	1039	>sp|P28340|DPOD1_HUMAN DNA polymerase delta catalytic subunit OS=Homo sapiens OX=9606 GN=POLD1 PE=1 SV=2	1.34124e-05	1	K	ESELYQK(1)EVSHLNALEER	3	1.5963	1.86466e+07	4.34743e+06	-2.10068	4130800	1	21.978
sp|Q9UGL1|KDM5B_HUMAN	297	>sp|Q9UGL1|KDM5B_HUMAN Lysine-specific demethylase 5B OS=Homo sapiens OX=9606 GN=KDM5B PE=1 SV=3	0.0117377	1	K	DYIVENEK(0.047)EK(0.186)PK(0.767)SR	4	0.38195	1	1	0	4085100	1	21.9619
sp|Q8IVM0|CCD50_HUMAN	60	>sp|Q8IVM0|CCD50_HUMAN Coiled-coil domain-containing protein 50 OS=Homo sapiens OX=9606 GN=CCDC50 PE=1 SV=1	0.00013049	1	K	LVQHDLQVAK(1)QLQEEDLK	3	-0.44656	1	4.04798e+06	21.9488	4074600	1	21.9582
sp|P46939|UTRO_HUMAN	3074	>sp|P46939|UTRO_HUMAN Utrophin OS=Homo sapiens OX=9606 GN=UTRN PE=1 SV=2	1.09751e-10	1	K	CNICK(1)ECPIVGFR	2	-0.24406	1.34996e+08	6.98606e+07	-0.950366	4028800	1	21.9419
sp|O43491|E41L2_HUMAN	155	>sp|O43491|E41L2_HUMAN Band 4.1-like protein 2 OS=Homo sapiens OX=9606 GN=EPB41L2 PE=1 SV=1	0.00306803	1	K	EEK(0.003)PSVSK(0.011)EEK(0.986)PSVSK	4	-0.41002	2.65277e+06	1	-21.3391	4027900	1	21.9416
sp|O95104|SFR15_HUMAN	119	>sp|O95104|SFR15_HUMAN Splicing factor, arginine/serine-rich 15 OS=Homo sapiens OX=9606 GN=SCAF4 PE=1 SV=3	0.00334257	1	K	VLNLWQK(0.971)NGVFK(0.029)	3	0.27641	1.77952e+06	1	-20.7631	4009900	1	21.9351
sp|O14867|BACH1_HUMAN	177	>sp|O14867|BACH1_HUMAN Transcription regulator protein BACH1 OS=Homo sapiens OX=9606 GN=BACH1 PE=1 SV=2	2.70866e-05	1	K	DLETDEVEEFLENK(0.995)NVQTPQCK(0.005)	3	0.4016	1.47287e+06	1	-20.4902	3984300	1	21.9259
sp|P63261|ACTG_HUMAN;sp|P60709|ACTB_HUMAN	284;284	>sp|P63261|ACTG_HUMAN Actin, cytoplasmic 2 OS=Homo sapiens OX=9606 GN=ACTG1 PE=1 SV=1;>sp|P60709|ACTB_HUMAN Actin, cytoplasmic 1 OS=Homo sapiens OX=9606 GN=ACTB PE=1 SV=1	1.56447e-10	1	K	CPEALFQPSFLGMESCGIHETTFNSIMK(1)CDVDIR	4	-1.5514	1	1	0	3960900	1	21.9174
sp|P24928|RPB1_HUMAN	853	>sp|P24928|RPB1_HUMAN DNA-directed RNA polymerase II subunit RPB1 OS=Homo sapiens OX=9606 GN=POLR2A PE=1 SV=2	0.000148646	1	K	EGLIDTAVK(1)TAETGYIQR	3	0.8886	1	1	0	3940500	1	21.9099
sp|Q96DB5|RMD1_HUMAN	261	>sp|Q96DB5|RMD1_HUMAN Regulator of microtubule dynamics protein 1 OS=Homo sapiens OX=9606 GN=RMDN1 PE=1 SV=1	0.000809689	1	K	AEQVDPNFYSK(0.998)NLLLLGK(0.002)	3	3.0331	1	1	0	3918000	1	21.9017
sp|O43513|MED7_HUMAN	185	>sp|O43513|MED7_HUMAN Mediator of RNA polymerase II transcription subunit 7 OS=Homo sapiens OX=9606 GN=MED7 PE=1 SV=1	0.000187124	1	K	VK(1)TEPMDADDSNNCTGQNEHQR	4	-0.74795	2.71156e+06	1	-21.3707	3884800	1	21.8894
sp|P46939|UTRO_HUMAN	1512	>sp|P46939|UTRO_HUMAN Utrophin OS=Homo sapiens OX=9606 GN=UTRN PE=1 SV=2	0.00208681	1	K	QQTDNPK(1)GMDEQLTSLK	3	-1.38	1.66003e+07	1	-23.9847	3842400	1	21.8736
sp|Q13509|TBB3_HUMAN	58	>sp|Q13509|TBB3_HUMAN Tubulin beta-3 chain OS=Homo sapiens OX=9606 GN=TUBB3 PE=1 SV=2	1.5951e-17	1	K	ISVYYNEASSHK(1)YVPR	3	0.83503	1.0291e+07	3.00867e+07	1.54774	3816300	1	21.8637
sp|P35869|AHR_HUMAN	641	>sp|P35869|AHR_HUMAN Aryl hydrocarbon receptor OS=Homo sapiens OX=9606 GN=AHR PE=1 SV=2	2.9752e-05	1	K	QVVVEPQQQLCQK(0.95)MK(0.05)	3	-1.0681	1.03158e+07	2.32725e+07	1.17377	3768500	1	21.8456
sp|Q96EE4|CC126_HUMAN;sp|Q09328|MGT5A_HUMAN	54;55	>sp|Q96EE4|CC126_HUMAN Coiled-coil domain-containing protein 126 OS=Homo sapiens OX=9606 GN=CCDC126 PE=2 SV=2;>sp|Q09328|MGT5A_HUMAN Alpha-1,6-mannosylglycoprotein 6-beta-N-acetylglucosaminyltransferase A OS=Homo sapiens OX=9606 GN=MGAT5 PE=2 SV=1	0.0259285		K	EQILDLSK(1)R	2	1.9995	2.08778e+07	2.93839e+07	0.493055	3698900	1	21.8187
sp|P29966|MARCS_HUMAN	11	>sp|P29966|MARCS_HUMAN Myristoylated alanine-rich C-kinase substrate OS=Homo sapiens OX=9606 GN=MARCKS PE=1 SV=4	0.00105272	1	K	TAAK(1)GEAAAERPGEAAVASSPSK	3	-0.060141	1	1.00972e+07	23.2675	3689500	1	21.815
sp|P12270|TPR_HUMAN	1400	>sp|P12270|TPR_HUMAN Nucleoprotein TPR OS=Homo sapiens OX=9606 GN=TPR PE=1 SV=3	0.00138931	1	K	SNASLTNNQNLIQSLK(0.97)EDLNK(0.03)	3	1.2788	1	1	0	3673800	1	21.8088
sp|O14579|COPE_HUMAN	278	>sp|O14579|COPE_HUMAN Coatomer subunit epsilon OS=Homo sapiens OX=9606 GN=COPE PE=1 SV=3	0.0105382	1	K	YLSQLK(1)DAHR	3	-0.73629	1	5.54347e+06	22.4024	3658400	1	21.8028
sp|P16615|AT2A2_HUMAN;sp|O14983|AT2A1_HUMAN	120;120	>sp|P16615|AT2A2_HUMAN Sarcoplasmic/endoplasmic reticulum calcium ATPase 2 OS=Homo sapiens OX=9606 GN=ATP2A2 PE=1 SV=1;>sp|O14983|AT2A1_HUMAN Sarcoplasmic/endoplasmic reticulum calcium ATPase 1 OS=Homo sapiens OX=9606 GN=ATP2A1 PE=1 SV=1	0.000707058	1	K	NAENAIEALK(0.99)EYEPEMGK(0.01)	3	-0.12469	2.69672e+06	1	-21.3628	3643300	1	21.7968
sp|P22314|UBA1_HUMAN	657	>sp|P22314|UBA1_HUMAN Ubiquitin-like modifier-activating enzyme 1 OS=Homo sapiens OX=9606 GN=UBA1 PE=1 SV=3	0.000493369	1	K	DEFEGLFK(0.998)QPAENVNQYLTDPK(0.002)	3	0.36962	1	1	0	3603100	1	21.7808
sp|P35579|MYH9_HUMAN;sp|P35580|MYH10_HUMAN;sp|Q7Z406|MYH14_HUMAN	1445;1452;1469	>sp|P35579|MYH9_HUMAN Myosin-9 OS=Homo sapiens OX=9606 GN=MYH9 PE=1 SV=4;>sp|P35580|MYH10_HUMAN Myosin-10 OS=Homo sapiens OX=9606 GN=MYH10 PE=1 SV=3;>sp|Q7Z406|MYH14_HUMAN Myosin-14 OS=Homo sapiens OX=9606 GN=MYH14 PE=1 SV=2	0.00471924	1	K	K(1)FDQLLAEEK	2	0.23612	1.31631e+07	1.02392e+07	-0.362395	3587400	1	21.7745
sp|P49790|NU153_HUMAN	167	>sp|P49790|NU153_HUMAN Nuclear pore complex protein Nup153 OS=Homo sapiens OX=9606 GN=NUP153 PE=1 SV=2	4.47125e-10	1	K	SHLNFSMLESPALHCQPSTSSAFPIGSSGFSLVK(0.5)EIK(0.5)	4	-1.1992	1	1	0	3579000	1	21.7711
sp|P49790|NU153_HUMAN	170	>sp|P49790|NU153_HUMAN Nuclear pore complex protein Nup153 OS=Homo sapiens OX=9606 GN=NUP153 PE=1 SV=2	4.47125e-10	1	K	SHLNFSMLESPALHCQPSTSSAFPIGSSGFSLVK(0.5)EIK(0.5)	4	-1.1992	1	1	0	3579000	1	21.7711
sp|Q9H2K2|TNKS2_HUMAN	169	>sp|Q9H2K2|TNKS2_HUMAN Tankyrase-2 OS=Homo sapiens OX=9606 GN=TNKS2 PE=1 SV=1	0.000701578	1	K	TALDLADPSAK(1)AVLTGEYK	3	-0.1613	1	1	0	3578500	1	21.7709
sp|P61586|RHOA_HUMAN	133	>sp|P61586|RHOA_HUMAN Transforming protein RhoA OS=Homo sapiens OX=9606 GN=RHOA PE=1 SV=1	0.00368662	2	K	ELAK(1)MK(0.999)QEPVK(0.001)PEEGR	4	-0.20876	2.17219e+06	1	-21.0507	3520700	1	21.7474
sp|P37108|SRP14_HUMAN	74	>sp|P37108|SRP14_HUMAN Signal recognition particle 14 kDa protein OS=Homo sapiens OX=9606 GN=SRP14 PE=1 SV=2	3.41362e-09	1	K	ISTVVSSK(1)EVNK	2	1.233	4.49211e+06	7.42371e+06	0.724747	3446200	1	21.7166
sp|Q9Y4E5|ZN451_HUMAN	153	>sp|Q9Y4E5|ZN451_HUMAN E3 SUMO-protein ligase ZNF451 OS=Homo sapiens OX=9606 GN=ZNF451 PE=1 SV=2	0.000999803	1	K	TGTINCGTK(1)SSFR	3	-0.7234	1	1	0	3424900	1	21.7076
sp|Q8TAD7|OCC1_HUMAN	34	>sp|Q8TAD7|OCC1_HUMAN Overexpressed in colon carcinoma 1 protein OS=Homo sapiens OX=9606 GN=OCC1 PE=1 SV=2	0.000198075	1	K	DVTEESVTEDDK(1)RR	3	0.29645	6.28429e+06	3.18834e+06	-0.978947	3388600	1	21.6923
sp|P37837|TALDO_HUMAN	258	>sp|P37837|TALDO_HUMAN Transaldolase OS=Homo sapiens OX=9606 GN=TALDO1 PE=1 SV=2	6.05899e-05	1	K	ALAGCDFLTISPK(1)LLGELLQDNAK	3	-0.78809	1	9.35354e+06	23.1571	3355400	1	21.6781
sp|P53621|COPA_HUMAN	447	>sp|P53621|COPA_HUMAN Coatomer subunit alpha OS=Homo sapiens OX=9606 GN=COPA PE=1 SV=2	7.99627e-07	1	K	K(1)VQVPNCDEIFYAGTGNLLLR	3	-3.3248	1	1	0	3349300	1	21.6754
sp|Q9NQC3|RTN4_HUMAN	1104	>sp|Q9NQC3|RTN4_HUMAN Reticulon-4 OS=Homo sapiens OX=9606 GN=RTN4 PE=1 SV=2	1.59691e-06	1	K	YSNSALGHVNCTIK(1)ELR	4	-0.015067	1.50925e+07	1.24214e+07	-0.281011	3330000	1	21.6671
sp|O60763|USO1_HUMAN	705	>sp|O60763|USO1_HUMAN General vesicular transport factor p115 OS=Homo sapiens OX=9606 GN=USO1 PE=1 SV=2	7.63883e-06	1	K	CQNEQLQTAVTQQVSQIQQHK(0.446)DQYNLLK(0.554)	4	2.1248	1	1	0	3315700	1	21.6609
sp|Q58WW2|DCAF6_HUMAN	308	>sp|Q58WW2|DCAF6_HUMAN DDB1- and CUL4-associated factor 6 OS=Homo sapiens OX=9606 GN=DCAF6 PE=1 SV=1	0.00755703	1	K	EELRQPPVK(1)R	3	-0.35758	4.47872e+06	560655	-2.9979	3268400	1	21.6402
sp|P35998|PRS7_HUMAN	100	>sp|P35998|PRS7_HUMAN 26S proteasome regulatory subunit 7 OS=Homo sapiens OX=9606 GN=PSMC2 PE=1 SV=3	0.0139402	1	K	CTK(1)IINADSEDPK	2	0.94072	3.83834e+06	3.0453e+06	-0.333897	3266000	1	21.6391
sp|Q13107|UBP4_HUMAN	837	>sp|Q13107|UBP4_HUMAN Ubiquitin carboxyl-terminal hydrolase 4 OS=Homo sapiens OX=9606 GN=USP4 PE=1 SV=3	3.66675e-05	1	K	DK(1)LDTVVEFPIR	3	-1.5203	1.15623e+07	8.30527e+06	-0.477331	3264400	1	21.6384
sp|O75886|STAM2_HUMAN	172	>sp|O75886|STAM2_HUMAN Signal transducing adapter molecule 2 OS=Homo sapiens OX=9606 GN=STAM2 PE=1 SV=1	0.00182547	1	K	NK(0.023)EDEDIAK(0.977)AIELSLQEQK	3	0.95613	1	1	0	3238300	1	21.6268
sp|Q567U6|CCD93_HUMAN	601	>sp|Q567U6|CCD93_HUMAN Coiled-coil domain-containing protein 93 OS=Homo sapiens OX=9606 GN=CCDC93 PE=1 SV=2	0.00185526	1	K	DQLNDQYLELLEK(1)QR	3	-0.35914	1	1	0	3233900	1	21.6248
sp|Q12866|MERTK_HUMAN	615	>sp|Q12866|MERTK_HUMAN Tyrosine-protein kinase Mer OS=Homo sapiens OX=9606 GN=MERTK PE=1 SV=2	0.0326321	1	K	QEDGTSLK(0.998)VAVK(0.002)	2	1.1919	1	1	0	3228400	1	21.6224
sp|Q9BXB4|OSB11_HUMAN;sp|Q9BXB5|OSB10_HUMAN	395;425	>sp|Q9BXB4|OSB11_HUMAN Oxysterol-binding protein-related protein 11 OS=Homo sapiens OX=9606 GN=OSBPL11 PE=1 SV=2;>sp|Q9BXB5|OSB10_HUMAN Oxysterol-binding protein-related protein 10 OS=Homo sapiens OX=9606 GN=OSBPL10 PE=1 SV=2	0.000999704	1	K	VVLPTFILEK(1)R	3	0.80306	2.91459e+07	1.21929e+07	-1.25725	3146600	1	21.5854
sp|Q96GQ5|RUS1_HUMAN	436	>sp|Q96GQ5|RUS1_HUMAN RUS1 family protein C16orf58 OS=Homo sapiens OX=9606 GN=C16orf58 PE=1 SV=2	0.0017133	1	K	FLK(1)GLQDAGWK	3	0.24356	1	1	0	3125800	1	21.5758
sp|Q6IA69|NADE_HUMAN	421	>sp|Q6IA69|NADE_HUMAN Glutamine-dependent NAD(+) synthetase OS=Homo sapiens OX=9606 GN=NADSYN1 PE=1 SV=3	0.000976474	1	K	ILTTCYMASK(1)NSSQETCTR	3	0.0689	1	1	0	3090000	1	21.5592
sp|Q8NB14|UBP38_HUMAN	773	>sp|Q8NB14|UBP38_HUMAN Ubiquitin carboxyl-terminal hydrolase 38 OS=Homo sapiens OX=9606 GN=USP38 PE=1 SV=2	0.00261734	1	K	FSYDQK(1)YHVR	3	0.69856	7.05318e+06	1	-22.7498	3059700	1	21.545
sp|P55011|S12A2_HUMAN	1098	>sp|P55011|S12A2_HUMAN Solute carrier family 12 member 2 OS=Homo sapiens OX=9606 GN=SLC12A2 PE=1 SV=1	4.9735e-07	1	K	K(1)ENIIAFEEIIEPYR	3	-3.4556	1.30854e+06	1	-20.3195	3048200	1	21.5395
sp|P63104|1433Z_HUMAN	3	>sp|P63104|1433Z_HUMAN 14-3-3 protein zeta/delta OS=Homo sapiens OX=9606 GN=YWHAZ PE=1 SV=1	0.0295167		K	MDK(1)NELVQK(0.965)AK(0.035)	3	-3.0036	2.59964e+06	1.7867e+06	-0.541018	3033000	1	21.5323
sp|P63104|1433Z_HUMAN	9	>sp|P63104|1433Z_HUMAN 14-3-3 protein zeta/delta OS=Homo sapiens OX=9606 GN=YWHAZ PE=1 SV=1	0.0295167		K	MDK(1)NELVQK(0.965)AK(0.035)	3	-3.0036	2.59964e+06	1.7867e+06	-0.541018	3033000	1	21.5323
sp|Q14524|SCN5A_HUMAN	1922	>sp|Q14524|SCN5A_HUMAN Sodium channel protein type 5 subunit alpha OS=Homo sapiens OX=9606 GN=SCN5A PE=1 SV=2	0.002991	1	K	SLK(1)HASFLFR	3	1.3988	1	6.53576e+06	22.6399	3032300	1	21.532
sp|Q14980|NUMA1_HUMAN	1566	>sp|Q14980|NUMA1_HUMAN Nuclear mitotic apparatus protein 1 OS=Homo sapiens OX=9606 GN=NUMA1 PE=1 SV=2	0.000212914	1	K	LADSDQASK(1)VQQQK	3	0.74604	347100	1	-18.405	2946100	1	21.4904
sp|Q9UP95|S12A4_HUMAN	893	>sp|Q9UP95|S12A4_HUMAN Solute carrier family 12 member 4 OS=Homo sapiens OX=9606 GN=SLC12A4 PE=1 SV=2	0.00669785	1	K	K(1)DLAVFLYHLR	3	0.089699	1	7.45293e+06	22.8294	2928000	1	21.4815
sp|Q96FJ2|DYL2_HUMAN	36	>sp|Q96FJ2|DYL2_HUMAN Dynein light chain 2, cytoplasmic OS=Homo sapiens OX=9606 GN=DYNLL2 PE=1 SV=1	0.00155202	1	K	YNIEK(1)DIAAYIK	3	-1.4039	1.57096e+07	1	-23.9051	2918200	1	21.4766
sp|P55036|PSMD4_HUMAN	129	>sp|P55036|PSMD4_HUMAN 26S proteasome non-ATPase regulatory subunit 4 OS=Homo sapiens OX=9606 GN=PSMD4 PE=1 SV=1	0.00237065	1	K	IIAFVGSPVEDNEK(0.092)DLVK(0.319)LAK(0.589)	3	0.60839	1	1	0	2878700	1	21.457
sp|Q9P0L0|VAPA_HUMAN	205	>sp|Q9P0L0|VAPA_HUMAN Vesicle-associated membrane protein-associated protein A OS=Homo sapiens OX=9606 GN=VAPA PE=1 SV=3	0.00184832	1	K	K(0.904)VAHSDK(0.096)PGSTSTASFR	4	0.23281	1	1	0	2849500	1	21.4423
sp|Q99729|ROAA_HUMAN	223	>sp|Q99729|ROAA_HUMAN Heterogeneous nuclear ribonucleoprotein A/B OS=Homo sapiens OX=9606 GN=HNRNPAB PE=1 SV=2	0.0017384	1	K	FHTVSGSK(0.998)CEIK(0.002)	3	-0.39911	1	1	0	2834600	1	21.4347
sp|P42857|NSG1_HUMAN	14	>sp|P42857|NSG1_HUMAN Neuronal vesicle trafficking-associated protein 1 OS=Homo sapiens OX=9606 GN=NSG1 PE=1 SV=1	1.52817e-09	1	K	GTK(1)QPLLEDGFDTIPLMTPLDVNQLQFPPPDKVVVK	4	0.056237	1	1	0	2820500	1	21.4275
sp|Q99571|P2RX4_HUMAN	373	>sp|Q99571|P2RX4_HUMAN P2X purinoceptor 4 OS=Homo sapiens OX=9606 GN=P2RX4 PE=1 SV=2	0.0104239	1	K	YK(1)YVEDYEQGLASELDQ	2	1.3742	1	1	0	2767600	1	21.4002
sp|Q9Y617|SERC_HUMAN	51	>sp|Q9Y617|SERC_HUMAN Phosphoserine aminotransferase OS=Homo sapiens OX=9606 GN=PSAT1 PE=1 SV=2	1.40801e-16	1	K	SSDFAK(1)IINNTENLVR	3	-1.0182	6.44919e+07	2.8998e+06	-4.47509	2764900	1	21.3988
sp|P09543|CN37_HUMAN	79	>sp|P09543|CN37_HUMAN 2',3'-cyclic-nucleotide 3'-phosphodiesterase OS=Homo sapiens OX=9606 GN=CNP PE=1 SV=2	0.00304177	1	K	DGTK(1)MVSADAYK	2	-0.93011	1	7.12941e+06	22.7654	2762400	1	21.3975
sp|Q9Y2X0|MED16_HUMAN	420	>sp|Q9Y2X0|MED16_HUMAN Mediator of RNA polymerase II transcription subunit 16 OS=Homo sapiens OX=9606 GN=MED16 PE=1 SV=2	0.0276662	1	K	PVDEPAMK(1)RPR	3	-1.0384	2.22779e+06	9.15803e+06	2.03942	2756800	1	21.3946
sp|Q5SW79|CE170_HUMAN	191	>sp|Q5SW79|CE170_HUMAN Centrosomal protein of 170 kDa OS=Homo sapiens OX=9606 GN=CEP170 PE=1 SV=1	0.000597338	1	K	GTPLYGQPSWWGDDEVDEK(1)R	3	-0.082383	1	7.40488e+06	22.82	2724800	1	21.3777
sp|Q05086|UBE3A_HUMAN	702	>sp|Q05086|UBE3A_HUMAN Ubiquitin-protein ligase E3A OS=Homo sapiens OX=9606 GN=UBE3A PE=1 SV=4	0.00631757	1	K	ENGDK(1)IPITNENRK	3	0.92575	4.31746e+06	3.61384e+06	-0.25665	2716900	1	21.3735
sp|P12270|TPR_HUMAN	952	>sp|P12270|TPR_HUMAN Nucleoprotein TPR OS=Homo sapiens OX=9606 GN=TPR PE=1 SV=3	0.000655547	1	K	QTEEQVNDLK(1)ER	2	1.9375	1	1	0	2710900	1	21.3703
sp|P41440|S19A1_HUMAN	489	>sp|P41440|S19A1_HUMAN Folate transporter 1 OS=Homo sapiens OX=9606 GN=SLC19A1 PE=1 SV=3	5.59436e-18	1	K	AAQALSVQDK(1)GLGGLQPAQSPPLSPEDSLGAVGPASLEQR	4	0.18549	1	1	0	2697500	1	21.3632
sp|Q9H0M0|WWP1_HUMAN	588	>sp|Q9H0M0|WWP1_HUMAN NEDD4-like E3 ubiquitin-protein ligase WWP1 OS=Homo sapiens OX=9606 GN=WWP1 PE=1 SV=1	0.000798594	1	K	QTLFEDSFQQIMALK(1)PYDLR	3	-0.68931	1	1	0	2548600	1	21.2813
sp|P51665|PSMD7_HUMAN	103	>sp|P51665|PSMD7_HUMAN 26S proteasome non-ATPase regulatory subunit 7 OS=Homo sapiens OX=9606 GN=PSMD7 PE=1 SV=2	0.00354225	1	K	IVGWYHTGPK(0.119)LHK(0.881)	3	-0.56283	121135	1	-16.8863	2546800	1	21.2803
sp|P05783|K1C18_HUMAN;CON__H-INV:HIT000015463	317;217	>sp|P05783|K1C18_HUMAN Keratin, type I cytoskeletal 18 OS=Homo sapiens OX=9606 GN=KRT18 PE=1 SV=2;>H-INV:HIT000015463 Tax_Id=9606 Gene_Symbol=PTPN14 Similar to Keratin 18	0.00863798	1	K	NLK(1)ASLENSLR	3	-1.4537	1	9.08507e+06	23.1151	2542600	1	21.2779
sp|P28066|PSA5_HUMAN	239	>sp|P28066|PSA5_HUMAN Proteasome subunit alpha type-5 OS=Homo sapiens OX=9606 GN=PSMA5 PE=1 SV=3	0.0116071	1	K	EELEEVIK(1)DI	2	-0.91186	4.84766e+06	3.89836e+06	-0.31442	2520200	1	21.2651
sp|Q9UKS6|PACN3_HUMAN	392	>sp|Q9UKS6|PACN3_HUMAN Protein kinase C and casein kinase substrate in neurons protein 3 OS=Homo sapiens OX=9606 GN=PACSIN3 PE=1 SV=2	2.06756e-05	1	K	AGEELLK(1)MSEEDEQGWCQGQLQSGR	3	-0.37586	1	1	0	2455300	1	21.2275
sp|Q9UKJ3|GPTC8_HUMAN	1322	>sp|Q9UKJ3|GPTC8_HUMAN G patch domain-containing protein 8 OS=Homo sapiens OX=9606 GN=GPATCH8 PE=1 SV=2	0.000144847	1	K	YSK(1)LQQAAQQHIQQQLLAK	3	0.53741	5.98957e+06	8.19033e+06	0.451469	2445300	1	21.2216
sp|Q9UNS2|CSN3_HUMAN	30	>sp|Q9UNS2|CSN3_HUMAN COP9 signalosome complex subunit 3 OS=Homo sapiens OX=9606 GN=COPS3 PE=1 SV=3	6.57948e-06	1	K	QLSAQGQMTQLCELINK(0.988)SGELLAK(0.012)	3	0.52399	1	1	0	2394600	1	21.1914
sp|P78527|PRKDC_HUMAN	3840	>sp|P78527|PRKDC_HUMAN DNA-dependent protein kinase catalytic subunit OS=Homo sapiens OX=9606 GN=PRKDC PE=1 SV=3	0.00243003	1	K	APPCEYK(0.999)DWLTK(0.001)	3	0.68487	2.22692e+07	1.35955e+07	-0.711917	2392500	1	21.1901
sp|Q9Y696|CLIC4_HUMAN	110	>sp|Q9Y696|CLIC4_HUMAN Chloride intracellular channel protein 4 OS=Homo sapiens OX=9606 GN=CLIC4 PE=1 SV=4	0.000426065	1	K	LSPK(1)HPESNTAGMDIFAK	3	0.10893	6.06249e+06	1	-22.5315	2392100	1	21.1898
sp|P35580|MYH10_HUMAN	235	>sp|P35580|MYH10_HUMAN Myosin-10 OS=Homo sapiens OX=9606 GN=MYH10 PE=1 SV=3	3.11032e-11	1	K	QLLQANPILESFGNAK(0.338)TVK(0.662)	3	-0.55779	1	1	0	2388600	1	21.1877
sp|Q96JI7|SPTCS_HUMAN	981	>sp|Q96JI7|SPTCS_HUMAN Spatacsin OS=Homo sapiens OX=9606 GN=SPG11 PE=1 SV=3	0.00100401	1	K	IGGVIQDTLPVQNYK(0.566)TK(0.434)	3	0.54838	1.98736e+07	1	-24.2443	2335000	1	21.155
sp|Q99460|PSMD1_HUMAN	319	>sp|Q99460|PSMD1_HUMAN 26S proteasome non-ATPase regulatory subunit 1 OS=Homo sapiens OX=9606 GN=PSMD1 PE=1 SV=2	0.000924554	1	K	TPEASPEPK(0.933)DQTLK(0.067)	2	-0.82743	1	1	0	2322600	1	21.1473
sp|Q9Y490|TLN1_HUMAN;sp|Q9Y4G6|TLN2_HUMAN	1541;1543	>sp|Q9Y490|TLN1_HUMAN Talin-1 OS=Homo sapiens OX=9606 GN=TLN1 PE=1 SV=3;>sp|Q9Y4G6|TLN2_HUMAN Talin-2 OS=Homo sapiens OX=9606 GN=TLN2 PE=1 SV=4	0.00373352	1	K	EVANSTANLVK(0.984)TIK(0.016)	3	0.40588	3.32225e+07	1	-24.9857	2307400	1	21.1378
sp|Q9Y679|AUP1_HUMAN	443	>sp|Q9Y679|AUP1_HUMAN Ancient ubiquitous protein 1 OS=Homo sapiens OX=9606 GN=AUP1 PE=1 SV=1	2.82844e-10	1	K	FPSSGPVTPQPTALTFAK(1)SSWAR	3	0.33411	1	1	0	2262500	1	21.1095
sp|P06576|ATPB_HUMAN	133	>sp|P06576|ATPB_HUMAN ATP synthase subunit beta, mitochondrial OS=Homo sapiens OX=9606 GN=ATP5B PE=1 SV=3	0.00127675	1	K	VLDSGAPIK(1)IPVGPETLGR	3	-0.72101	1.5161e+07	1	-23.8539	2247600	1	21.1
sp|O76082|S22A5_HUMAN	324	>sp|O76082|S22A5_HUMAN Solute carrier family 22 member 5 OS=Homo sapiens OX=9606 GN=SLC22A5 PE=1 SV=1	0.000387919	1	K	ANGIVVPSTIFDPSELQDLSSK(0.5)K(0.5)	3	0.91956	1	771821	19.5579	2246300	1	21.0991
sp|O76082|S22A5_HUMAN	325	>sp|O76082|S22A5_HUMAN Solute carrier family 22 member 5 OS=Homo sapiens OX=9606 GN=SLC22A5 PE=1 SV=1	0.000387919	1	K	ANGIVVPSTIFDPSELQDLSSK(0.5)K(0.5)	3	0.91956	1	771821	19.5579	2246300	1	21.0991
sp|Q14847|LASP1_HUMAN	75	>sp|Q14847|LASP1_HUMAN LIM and SH3 domain protein 1 OS=Homo sapiens OX=9606 GN=LASP1 PE=1 SV=2	4.84466e-07	1	K	LK(1)QQSELQSQVR	2	-0.13917	3.94065e+06	3.82952e+06	-0.0412707	2209800	1	21.0755
sp|Q99570|PI3R4_HUMAN	772	>sp|Q99570|PI3R4_HUMAN Phosphoinositide 3-kinase regulatory subunit 4 OS=Homo sapiens OX=9606 GN=PIK3R4 PE=1 SV=3	4.13818e-05	1	K	NGSLPDCPPPEDPAIAQLLK(0.5)K(0.5)	3	2.0699	9.23585e+06	5.21346e+06	-0.825004	2180200	1	21.056
sp|Q99570|PI3R4_HUMAN	773	>sp|Q99570|PI3R4_HUMAN Phosphoinositide 3-kinase regulatory subunit 4 OS=Homo sapiens OX=9606 GN=PIK3R4 PE=1 SV=3	4.13818e-05	1	K	NGSLPDCPPPEDPAIAQLLK(0.5)K(0.5)	3	2.0699	9.23585e+06	5.21346e+06	-0.825004	2180200	1	21.056
sp|O14787|TNPO2_HUMAN;sp|Q92973|TNPO1_HUMAN	75;85	>sp|O14787|TNPO2_HUMAN Transportin-2 OS=Homo sapiens OX=9606 GN=TNPO2 PE=1 SV=3;>sp|Q92973|TNPO1_HUMAN Transportin-1 OS=Homo sapiens OX=9606 GN=TNPO1 PE=1 SV=2	1.09957e-06	1	K	SLSGLILK(0.349)NNVK(0.651)	2	-0.13119	1	3.05487e+06	21.5427	2167300	1	21.0475
sp|P62191|PRS4_HUMAN	86	>sp|P62191|PRS4_HUMAN 26S proteasome regulatory subunit 4 OS=Homo sapiens OX=9606 GN=PSMC1 PE=1 SV=1	0.000758096	1	K	NQEQMK(1)PLEEKQEEER	4	-0.53282	3.47885e+06	2.78578e+06	-0.320531	2164200	1	21.0454
sp|Q86SJ2|AMGO2_HUMAN	482	>sp|Q86SJ2|AMGO2_HUMAN Amphoterin-induced protein 2 OS=Homo sapiens OX=9606 GN=AMIGO2 PE=1 SV=1	5.16929e-05	1	K	VVFLEPLKDTAAGQNGK(1)VR	4	0.13582	9.37601e+06	1.33835e+07	0.513412	2100600	1	21.0024
sp|O95249|GOSR1_HUMAN	150	>sp|O95249|GOSR1_HUMAN Golgi SNAP receptor complex member 1 OS=Homo sapiens OX=9606 GN=GOSR1 PE=1 SV=1	0.00101064	1	K	KDIESYK(1)SGSGVNNR	3	0.28063	7.87607e+06	5.84312e+06	-0.430736	2093900	1	20.9978
sp|Q08357|S20A2_HUMAN	349	>sp|Q08357|S20A2_HUMAN Sodium-dependent phosphate transporter 2 OS=Homo sapiens OX=9606 GN=SLC20A2 PE=1 SV=1	2.95002e-48	1	K	SDGHVYHTVHK(1)DSGLYK	3	0.415	2.04179e+07	6.92545e+06	-1.55985	2086300	1	20.9925
sp|Q8IWA0|WDR75_HUMAN	123	>sp|Q8IWA0|WDR75_HUMAN WD repeat-containing protein 75 OS=Homo sapiens OX=9606 GN=WDR75 PE=1 SV=1	0.00857512	1	K	EK(1)PDIFQLVSVK	3	-0.26945	1	1	0	2045900	1	20.9643
sp|Q14195|DPYL3_HUMAN	345	>sp|Q14195|DPYL3_HUMAN Dihydropyrimidinase-related protein 3 OS=Homo sapiens OX=9606 GN=DPYSL3 PE=1 SV=1	1.02862e-09	1	K	AIGK(1)DNFTAIPEGTNGVEER	3	0.53382	2.46822e+07	2.78702e+07	0.175249	1986500	1	20.9218
sp|P09960|LKHA4_HUMAN	73	>sp|P09960|LKHA4_HUMAN Leukotriene A-4 hydrolase OS=Homo sapiens OX=9606 GN=LTA4H PE=1 SV=2	3.32854e-05	1	K	VVINGQEVK(1)YALGER	3	-0.15476	5.17324e+07	4.33179e+07	-0.256104	1917900	1	20.8711
sp|Q6PKG0|LARP1_HUMAN	753	>sp|Q6PKG0|LARP1_HUMAN La-related protein 1 OS=Homo sapiens OX=9606 GN=LARP1 PE=1 SV=2	1.96177e-06	1	K	FQQVPTDALANK(1)LFGAPEPSTIAR	3	1.7248	2.30463e+06	1.08233e+06	-1.0904	1864200	1	20.8301
sp|Q14699|RFTN1_HUMAN	479	>sp|Q14699|RFTN1_HUMAN Raftlin OS=Homo sapiens OX=9606 GN=RFTN1 PE=1 SV=4	3.40545e-11	1	K	DKQQAEENEK(1)NLEDQSSK	3	-0.17332	3.12796e+07	1.94507e+07	-0.685401	1851200	1	20.82
sp|P62241|RS8_HUMAN	193	>sp|P62241|RS8_HUMAN 40S ribosomal protein S8 OS=Homo sapiens OX=9606 GN=RPS8 PE=1 SV=2	0.00303426	1	K	ADGYVLEGK(1)ELEFYLR	3	2.3068	1	1	0	1839200	1	20.8106
sp|P41250|GARS_HUMAN	379	>sp|P41250|GARS_HUMAN Glycine--tRNA ligase OS=Homo sapiens OX=9606 GN=GARS PE=1 SV=3	0.000621398	1	K	FQNVADLHLYLYSAK(1)AQVSGQSAR	4	0.70539	1	1	0	1678500	1	20.6787
sp|Q7Z3B4|NUP54_HUMAN	363	>sp|Q7Z3B4|NUP54_HUMAN Nucleoporin p54 OS=Homo sapiens OX=9606 GN=NUP54 PE=1 SV=2	0.000165953	1	K	LDIISEDISELQK(0.997)NQTTSVAK(0.003)	3	2.384	1.04326e+06	7.46209e+06	2.83848	1671700	1	20.6729
sp|O60884|DNJA2_HUMAN	62	>sp|O60884|DNJA2_HUMAN DnaJ homolog subfamily A member 2 OS=Homo sapiens OX=9606 GN=DNAJA2 PE=1 SV=1	0.000871619	1	K	EISFAYEVLSNPEK(1)R	3	0.74082	1	1.06967e+07	23.3507	1659900	1	20.6627
sp|Q9Y263|PLAP_HUMAN	456	>sp|Q9Y263|PLAP_HUMAN Phospholipase A-2-activating protein OS=Homo sapiens OX=9606 GN=PLAA PE=1 SV=2	0.000216452	1	K	FIIDNTK(1)GQMLGLGNPSFSDPFTGGGR	3	0.41777	1	1	0	1628100	1	20.6348
sp|P22314|UBA1_HUMAN	806	>sp|P22314|UBA1_HUMAN Ubiquitin-like modifier-activating enzyme 1 OS=Homo sapiens OX=9606 GN=UBA1 PE=1 SV=3	3.12769e-05	1	K	AAVATFLQSVQVPEFTPK(0.458)SGVK(0.542)	3	0.53753	1	1	0	1612600	1	20.621
sp|P42356|PI4KA_HUMAN	632	>sp|P42356|PI4KA_HUMAN Phosphatidylinositol 4-kinase alpha OS=Homo sapiens OX=9606 GN=PI4KA PE=1 SV=4	0.000300636	1	K	DTPK(1)VMEPILQILQQK	3	0.13055	1	1	0	1610100	1	20.6187
sp|P04350|TBB4A_HUMAN	336	>sp|P04350|TBB4A_HUMAN Tubulin beta-4A chain OS=Homo sapiens OX=9606 GN=TUBB4A PE=1 SV=2	8.88858e-10	1	K	EVDEQMLSVQSK(1)NSSYFVEWIPNNVK	3	-0.080636	1	2.44877e+06	21.2236	1590200	1	20.6008
sp|Q9BTX1|NDC1_HUMAN	437	>sp|Q9BTX1|NDC1_HUMAN Nucleoporin NDC1 OS=Homo sapiens OX=9606 GN=NDC1 PE=1 SV=2	5.26536e-06	1	K	TSLFSSK(1)LSTPDVVSPFGTPFGSSVMNR	3	0.75592	3.28878e+06	1	-21.6491	1565400	1	20.5781
sp|Q7Z5H3|RHG22_HUMAN	260	>sp|Q7Z5H3|RHG22_HUMAN Rho GTPase-activating protein 22 OS=Homo sapiens OX=9606 GN=ARHGAP22 PE=1 SV=1	0.000420886	1	K	YEDFLSCAQLLTK(0.994)DEGEGTLELAK(0.006)	3	-1.096	3.48278e+06	1.06175e+06	-1.7138	1545000	1	20.5592
sp|Q9GZL7|WDR12_HUMAN	131	>sp|Q9GZL7|WDR12_HUMAN Ribosome biogenesis protein WDR12 OS=Homo sapiens OX=9606 GN=WDR12 PE=1 SV=2	3.71453e-05	1	K	IWSLEGK(1)SIMTIVGHTDVVK	4	0.56671	1	120931	16.8838	1533900	1	20.5488
sp|P09038|FGF2_HUMAN	228	>sp|P09038|FGF2_HUMAN Fibroblast growth factor 2 OS=Homo sapiens OX=9606 GN=FGF2 PE=1 SV=3	1.99878e-05	1	K	LLASK(1)CVTDECFFFER	3	0.10935	6.83793e+07	2.31665e+07	-1.56152	1503500	1	20.5199
sp|P11021|BIP_HUMAN	353	>sp|P11021|BIP_HUMAN Endoplasmic reticulum chaperone BiP OS=Homo sapiens OX=9606 GN=HSPA5 PE=1 SV=2	0.0287321		K	VLEDSDLK(0.427)K(0.573)	2	-0.27262	7.51411e+06	7.76329e+06	0.0470651	1477200	1	20.4944
sp|Q8TAQ2|SMRC2_HUMAN	872	>sp|Q8TAQ2|SMRC2_HUMAN SWI/SNF complex subunit SMARCC2 OS=Homo sapiens OX=9606 GN=SMARCC2 PE=1 SV=1	0.000160571	1	K	DIGEGNLSTAAAAALAAAAVK(0.5)AK(0.5)	3	0.57296	1	1	0	1426700	1	20.4443
sp|P17302|CXA1_HUMAN	114	>sp|P17302|CXA1_HUMAN Gap junction alpha-1 protein OS=Homo sapiens OX=9606 GN=GJA1 PE=1 SV=2	5.9339e-12	1	K	EEELK(1)VAQTDGVNVDMHLK	3	1.4777	3.72962e+07	2.11383e+07	-0.819172	1411300	1	20.4286
sp|Q8IWA4|MFN1_HUMAN	399	>sp|Q8IWA4|MFN1_HUMAN Mitofusin-1 OS=Homo sapiens OX=9606 GN=MFN1 PE=1 SV=2	0.0187295	1	K	IK(1)EVTEEVANK	2	-0.56853	1	1	0	1379300	1	20.3955
sp|Q9H6K1|CF106_HUMAN	228	>sp|Q9H6K1|CF106_HUMAN Uncharacterized protein C6orf106 OS=Homo sapiens OX=9606 GN=C6orf106 PE=1 SV=2	3.14831e-25	1	K	QSDENNLK(1)DPGGSEFDSISK	3	-0.13918	9.19729e+07	7.83655e+06	-3.55292	1335800	1	20.3493
sp|Q96GG9|DCNL1_HUMAN	24	>sp|Q96GG9|DCNL1_HUMAN DCN1-like protein 1 OS=Homo sapiens OX=9606 GN=DCUN1D1 PE=1 SV=1	1.15247e-05	1	K	QFMIFTQSSEK(1)TAVSCLSQNDWK	3	-1.4077	1	1	0	1327600	1	20.3404
sp|P23497|SP100_HUMAN	306	>sp|P23497|SP100_HUMAN Nuclear autoantigen Sp-100 OS=Homo sapiens OX=9606 GN=SP100 PE=1 SV=3	0.000504983	1	K	EK(0.002)PFSNSK(0.998)VECQAQAR	3	-0.12802	7.17209e+06	1.07111e+07	0.578646	1324400	1	20.3369
sp|O14672|ADA10_HUMAN	721	>sp|O14672|ADA10_HUMAN Disintegrin and metalloproteinase domain-containing protein 10 OS=Homo sapiens OX=9606 GN=ADAM10 PE=1 SV=1	0.0115709	1	K	LPPPKPLPGTLK(1)R	3	0.85767	1	1	0	1281900	1	20.2899
sp|Q9Y2X3|NOP58_HUMAN	206	>sp|Q9Y2X3|NOP58_HUMAN Nucleolar protein 58 OS=Homo sapiens OX=9606 GN=NOP58 PE=1 SV=1	0.000519099	1	K	IISDNLTYCK(1)CLQK	3	-0.26261	1.64956e+07	1	-23.9756	1277500	1	20.2849
sp|P18031|PTN1_HUMAN	342	>sp|P18031|PTN1_HUMAN Tyrosine-protein phosphatase non-receptor type 1 OS=Homo sapiens OX=9606 GN=PTPN1 PE=1 SV=1	0.0120427	1	K	EETQEDK(0.938)DCPIK(0.062)EEK	3	0.47197	1	892619	19.7677	1190400	1	20.183
sp|Q86UP2|KTN1_HUMAN	800	>sp|Q86UP2|KTN1_HUMAN Kinectin OS=Homo sapiens OX=9606 GN=KTN1 PE=1 SV=1	0.00293595	1	K	QNDQVSFASLVEELK(0.626)K(0.374)	3	0.42569	1	1	0	1184100	1	20.1754
sp|Q7Z3T8|ZFY16_HUMAN	1129	>sp|Q7Z3T8|ZFY16_HUMAN Zinc finger FYVE domain-containing protein 16 OS=Homo sapiens OX=9606 GN=ZFYVE16 PE=1 SV=3	0.0108002	1	K	LFITIYK(0.025)DALK(0.442)GK(0.533)	3	-0.58034	1	1	0	1178800	1	20.1689
sp|Q01968|OCRL_HUMAN	391	>sp|Q01968|OCRL_HUMAN Inositol polyphosphate 5-phosphatase OCRL-1 OS=Homo sapiens OX=9606 GN=OCRL PE=1 SV=3	9.17975e-05	1	K	NQDYK(1)DICAR	2	0.56263	6.48441e+07	3.38539e+07	-0.937652	1152900	1	20.1368
sp|P46940|IQGA1_HUMAN	1465	>sp|P46940|IQGA1_HUMAN Ras GTPase-activating-like protein IQGAP1 OS=Homo sapiens OX=9606 GN=IQGAP1 PE=1 SV=1	0.0275141	1	K	K(1)LTELGTVDPK	2	-0.29169	1	5.93368e+06	22.5005	1148600	1	20.1314
sp|P35580|MYH10_HUMAN	840	>sp|P35580|MYH10_HUMAN Myosin-10 OS=Homo sapiens OX=9606 GN=MYH10 PE=1 SV=3	9.76589e-05	1	K	VFTK(0.999)VK(0.001)PLLQVTR	3	-0.59818	2.87544e+07	2.69893e+07	-0.0913964	1141300	1	20.1222
sp|O60716|CTND1_HUMAN	878	>sp|O60716|CTND1_HUMAN Catenin delta-1 OS=Homo sapiens OX=9606 GN=CTNND1 PE=1 SV=1	4.36005e-21	1	K	NQK(0.997)SDK(0.001)K(0.001)PDREEIQMSNMGSNTK	4	-0.15814	3.89103e+06	7.61428e+06	0.968558	1139800	1	20.1203
sp|P17676|CEBPB_HUMAN	332	>sp|P17676|CEBPB_HUMAN CCAAT/enhancer-binding protein beta OS=Homo sapiens OX=9606 GN=CEBPB PE=1 SV=2	0.000120533	1	K	NLFK(1)QLPEPLLASSGHC	3	0.72002	1.94922e+07	1	-24.2164	1133900	1	20.1129
sp|Q9HBU6|EKI1_HUMAN	274	>sp|Q9HBU6|EKI1_HUMAN Ethanolamine kinase 1 OS=Homo sapiens OX=9606 GN=ETNK1 PE=1 SV=1	0.00205283	1	K	YFSLIPTGFADEDINK(1)R	3	-1.1964	1	1	0	1125200	1	20.1018
sp|Q9UHB9|SRP68_HUMAN	220	>sp|Q9UHB9|SRP68_HUMAN Signal recognition particle subunit SRP68 OS=Homo sapiens OX=9606 GN=SRP68 PE=1 SV=2	0.000144505	1	K	TIYEK(1)LASAFTEEQAVLYNQR	3	-1.1754	1	1.35873e+06	20.3738	1121100	1	20.0965
sp|Q9P278|FNIP2_HUMAN	410	>sp|Q9P278|FNIP2_HUMAN Folliculin-interacting protein 2 OS=Homo sapiens OX=9606 GN=FNIP2 PE=1 SV=2	0.000172914	1	K	IAEPVWLTMMSGTLEK(1)NQLCQR	3	-1.0729	1	1	0	1121000	1	20.0964
sp|O60716|CTND1_HUMAN	881	>sp|O60716|CTND1_HUMAN Catenin delta-1 OS=Homo sapiens OX=9606 GN=CTNND1 PE=1 SV=1	8.23069e-06	1	K	SDK(0.929)K(0.071)PDREEIQMSNMGSNTK	3	-0.50293	4.99684e+06	3.96546e+06	-0.333529	1113600	1	20.0868
sp|Q15293|RCN1_HUMAN	122	>sp|Q15293|RCN1_HUMAN Reticulocalbin-1 OS=Homo sapiens OX=9606 GN=RCN1 PE=1 SV=1	0.000651835	1	K	YIFDNVAK(1)VWK	3	-0.016541	4.32343e+07	4.4953e+07	0.0562433	1104000	1	20.0743
sp|Q9Y617|SERC_HUMAN	323	>sp|Q9Y617|SERC_HUMAN Phosphoserine aminotransferase OS=Homo sapiens OX=9606 GN=PSAT1 PE=1 SV=2	0.00265592	1	K	FLDK(1)ALELNMLSLK	3	1.7331	1.98401e+07	1	-24.2419	1088900	1	20.0544
sp|Q92797|SYMPK_HUMAN	574	>sp|Q92797|SYMPK_HUMAN Symplekin OS=Homo sapiens OX=9606 GN=SYMPK PE=1 SV=2	5.82211e-05	1	K	AEK(1)AVACSGAAQVR	3	-0.2376	6.96047e+06	9.55791e+06	0.457509	1070400	1	20.0297
sp|O60826|CCD22_HUMAN	402	>sp|O60826|CCD22_HUMAN Coiled-coil domain-containing protein 22 OS=Homo sapiens OX=9606 GN=CCDC22 PE=1 SV=1	1.49915e-05	1	K	AVELLPDGTANLAK(1)LQLVVENSAQR	3	-0.21887	4.00833e+06	1	-21.9346	1055600	1	20.0096
sp|Q16630|CPSF6_HUMAN	185	>sp|Q16630|CPSF6_HUMAN Cleavage and polyadenylation specificity factor subunit 6 OS=Homo sapiens OX=9606 GN=CPSF6 PE=1 SV=2	8.91193e-05	1	K	TTQSGQMSGEGK(1)AGPPGGSSR	3	-0.19872	6.90983e+06	1	-22.7202	1050000	1	20.002
sp|Q86VM9|ZCH18_HUMAN	328	>sp|Q86VM9|ZCH18_HUMAN Zinc finger CCCH domain-containing protein 18 OS=Homo sapiens OX=9606 GN=ZC3H18 PE=1 SV=2	0.00117184	1	K	KEQEPDFEEK(1)R	3	0.19557	7.1635e+06	8.04709e+06	0.167802	1039300	1	19.9872
sp|Q8IZ07|AN13A_HUMAN	410	>sp|Q8IZ07|AN13A_HUMAN Ankyrin repeat domain-containing protein 13A OS=Homo sapiens OX=9606 GN=ANKRD13A PE=1 SV=3	1.90766e-05	1	K	LEFPPGFPVK(1)IEIPLFHVLNAR	4	0.82941	1	1.48324e+07	23.8222	1038300	1	19.9858
sp|Q14204|DYHC1_HUMAN	3190	>sp|Q14204|DYHC1_HUMAN Cytoplasmic dynein 1 heavy chain 1 OS=Homo sapiens OX=9606 GN=DYNC1H1 PE=1 SV=5	3.10706e-05	1	K	HYLDFINHYANLFHEK(1)R	5	-0.79965	1	515213	18.9748	986320	1	19.9117
sp|O43175|SERA_HUMAN	380	>sp|O43175|SERA_HUMAN D-3-phosphoglycerate dehydrogenase OS=Homo sapiens OX=9606 GN=PHGDH PE=1 SV=4	0.000804884	1	K	NAGNCLSPAVIVGLLK(0.901)EASK(0.099)	3	-0.65425	992834	1.70829e+07	4.10485	980650	1	19.9034
sp|P51003|PAPOA_HUMAN	385	>sp|P51003|PAPOA_HUMAN Poly(A) polymerase alpha OS=Homo sapiens OX=9606 GN=PAPOLA PE=1 SV=4	0.000354635	1	K	HYIVLLASAPTEK(1)QR	3	0.26856	9.47934e+06	1.08964e+07	0.200988	978150	1	19.8997
sp|Q6P2Q9|PRP8_HUMAN	727	>sp|Q6P2Q9|PRP8_HUMAN Pre-mRNA-processing-splicing factor 8 OS=Homo sapiens OX=9606 GN=PRPF8 PE=1 SV=2	0.00854857		K	ANIPWK(1)VPGLPTPIENMILR	3	-0.14436	1	1	0	973970	1	19.8935
sp|Q9UNA1|RHG26_HUMAN	454	>sp|Q9UNA1|RHG26_HUMAN Rho GTPase-activating protein 26 OS=Homo sapiens OX=9606 GN=ARHGAP26 PE=1 SV=1	0.0128357	1	K	TITSALK(1)TYLR	3	-0.023267	3.40929e+07	1.04292e+06	-5.03077	961850	1	19.8755
sp|Q5SRE5|NU188_HUMAN	344	>sp|Q5SRE5|NU188_HUMAN Nucleoporin NUP188 homolog OS=Homo sapiens OX=9606 GN=NUP188 PE=1 SV=1	5.73324e-05	1	K	K(1)IGGTAIQLNVFQYLTR	3	1.7732	1	1.54766e+07	23.8836	957750	1	19.8693
sp|Q8N9F7|GDPD1_HUMAN	105	>sp|Q8N9F7|GDPD1_HUMAN Lysophospholipase D GDPD1 OS=Homo sapiens OX=9606 GN=GDPD1 PE=1 SV=2	0.000558392	1	K	ATGVNVNISDLK(1)YCELPPYLGK	3	0.9198	2.84517e+07	1	-24.762	920860	1	19.8126
sp|Q15154|PCM1_HUMAN	1329	>sp|Q15154|PCM1_HUMAN Pericentriolar material 1 protein OS=Homo sapiens OX=9606 GN=PCM1 PE=1 SV=4	0.00164101	1	K	YESASMSSTCEPCK(1)SR	3	-0.17741	1.92274e+06	1.5315e+06	-0.328215	910830	1	19.7968
sp|P06576|ATPB_HUMAN	201	>sp|P06576|ATPB_HUMAN ATP synthase subunit beta, mitochondrial OS=Homo sapiens OX=9606 GN=ATP5B PE=1 SV=3	0.00344827	1	K	VVDLLAPYAK(0.396)GGK(0.604)	3	0.047928	1	2.57154e+07	24.6161	892720	1	19.7678
sp|Q8TAF3|WDR48_HUMAN	294	>sp|Q8TAF3|WDR48_HUMAN WD repeat-containing protein 48 OS=Homo sapiens OX=9606 GN=WDR48 PE=1 SV=1	0.00221158	1	K	VLICEEK(0.998)APVLK(0.002)	3	0.53946	1.54506e+07	1.63379e+07	0.0805578	853910	1	19.7037
sp|Q5TDH0|DDI2_HUMAN	338	>sp|Q5TDH0|DDI2_HUMAN Protein DDI1 homolog 2 OS=Homo sapiens OX=9606 GN=DDI2 PE=1 SV=1	1.74979e-08	1	K	K(1)NVLVIGTTGSQTTFLPEGELPECAR	3	1.808	2.80413e+07	1	-24.741	848240	1	19.6941
sp|Q14980|NUMA1_HUMAN	1699	>sp|Q14980|NUMA1_HUMAN Nuclear mitotic apparatus protein 1 OS=Homo sapiens OX=9606 GN=NUMA1 PE=1 SV=2	0.00192158	1	K	DLGK(1)FQVATDALK	3	0.31005	8.24676e+06	1	-22.9754	845100	1	19.6888
sp|Q16875|F263_HUMAN	302	>sp|Q16875|F263_HUMAN 6-phosphofructo-2-kinase/fructose-2,6-bisphosphatase 3 OS=Homo sapiens OX=9606 GN=PFKFB3 PE=1 SV=1	0.00541386		K	VWTSQLK(1)STIQTAEALR	3	2.317	1	1	0	808790	1	19.6254
sp|O14939|PLD2_HUMAN	80	>sp|O14939|PLD2_HUMAN Phospholipase D2 OS=Homo sapiens OX=9606 GN=PLD2 PE=1 SV=2	0.000736722	1	K	YTSGSK(1)VGTCTLYSVR	3	-0.84214	8.53886e+06	9.50965e+06	0.155348	802100	1	19.6134
sp|Q9UNH7|SNX6_HUMAN	265	>sp|Q9UNH7|SNX6_HUMAN Sorting nexin-6 OS=Homo sapiens OX=9606 GN=SNX6 PE=1 SV=1	0.00432413		K	IGSSLYALGTQDSTDICK(0.781)FFLK(0.219)	3	3.5498	1	1.02404e+06	19.9658	797820	1	19.6057
sp|P60174|TPIS_HUMAN	168	>sp|P60174|TPIS_HUMAN Triosephosphate isomerase OS=Homo sapiens OX=9606 GN=TPI1 PE=1 SV=3	0.000397562	1	K	VAHALAEGLGVIACIGEK(1)LDER	4	-1.1937	1	1	0	796750	1	19.6038
sp|Q9H6Y2|WDR55_HUMAN	85	>sp|Q9H6Y2|WDR55_HUMAN WD repeat-containing protein 55 OS=Homo sapiens OX=9606 GN=WDR55 PE=1 SV=2	0.00570196	1	K	ELWSSGHHLK(1)ACR	3	0.63964	1.84953e+06	1	-20.8187	789930	1	19.5914
sp|Q96DH6|MSI2H_HUMAN	166	>sp|Q96DH6|MSI2H_HUMAN RNA-binding protein Musashi homolog 2 OS=Homo sapiens OX=9606 GN=MSI2 PE=1 SV=1	0.00011824	1	K	GFGFVTFENEDVVEK(0.998)VCEIHFHEINNK(0.002)	4	0.70355	1	1	0	760170	1	19.536
sp|O60716|CTND1_HUMAN	710	>sp|O60716|CTND1_HUMAN Catenin delta-1 OS=Homo sapiens OX=9606 GN=CTNND1 PE=1 SV=1	4.14322e-10	1	K	SALRQEK(1)ALSAIADLLTNEHER	4	0.5739	5.55266e+06	4.30401e+06	-0.367499	734190	1	19.4858
sp|P41250|GARS_HUMAN	219	>sp|P41250|GARS_HUMAN Glycine--tRNA ligase OS=Homo sapiens OX=9606 GN=GARS PE=1 SV=3	0.0173158	1	K	ADHLLK(0.994)AHLQK(0.006)	3	1.0054	4.71289e+06	1.21343e+06	-1.95752	729420	1	19.4764
sp|Q9NR30|DDX21_HUMAN	116	>sp|Q9NR30|DDX21_HUMAN Nucleolar RNA helicase 2 OS=Homo sapiens OX=9606 GN=DDX21 PE=1 SV=5	0.000287995	1	K	K(0.223)VTK(0.777)NEEPSEEEIDAPKPK	4	1.3541	1.47898e+07	1	-23.8181	728450	1	19.4745
sp|P60033|CD81_HUMAN	148	>sp|P60033|CD81_HUMAN CD81 antigen OS=Homo sapiens OX=9606 GN=CD81 PE=1 SV=1	0.000278931	1	K	AVVK(1)TFHETLDCCGSSTLTALTTSVLK	3	-0.054487	1	1	0	721840	1	19.4613
sp|P48643|TCPE_HUMAN	368	>sp|P48643|TCPE_HUMAN T-complex protein 1 subunit epsilon OS=Homo sapiens OX=9606 GN=CCT5 PE=1 SV=1	3.25625e-12	1	K	LGFAGLVQEISFGTTK(0.826)DK(0.174)	3	0.40094	1	1	0	689390	1	19.395
sp|P63244|RACK1_HUMAN	185	>sp|P63244|RACK1_HUMAN Receptor of activated protein C kinase 1 OS=Homo sapiens OX=9606 GN=RACK1 PE=1 SV=3	3.62998e-07	1	K	LK(1)TNHIGHTGYLNTVTVSPDGSLCASGGK	4	-0.90005	1.2156e+07	1.4924e+07	0.295966	668320	1	19.3502
sp|Q9NZM3|ITSN2_HUMAN	584	>sp|Q9NZM3|ITSN2_HUMAN Intersectin-2 OS=Homo sapiens OX=9606 GN=ITSN2 PE=1 SV=3	2.0576e-05	1	K	NMQFSNTPDSGVSLLHK(0.45)K(0.55)	3	-0.4776	2.91619e+07	3.36358e+06	-3.11602	664570	1	19.3421
sp|P68036|UB2L3_HUMAN	9	>sp|P68036|UB2L3_HUMAN Ubiquitin-conjugating enzyme E2 L3 OS=Homo sapiens OX=9606 GN=UBE2L3 PE=1 SV=1	0.0423675	1	K	RLMK(1)ELEEIR	2	-1.4539	6.7049e+07	3.531e+07	-0.925139	644880	1	19.2987
sp|Q16281|CNGA3_HUMAN	463	>sp|Q16281|CNGA3_HUMAN Cyclic nucleotide-gated cation channel alpha-3 OS=Homo sapiens OX=9606 GN=CNGA3 PE=1 SV=2	0.0210606	2	K	TVDEKEVLKSLPDK(1)LK(1)	3	-4.0953	7.12435e+06	1	-22.7643	623360	1	19.2497
sp|Q16281|CNGA3_HUMAN	465	>sp|Q16281|CNGA3_HUMAN Cyclic nucleotide-gated cation channel alpha-3 OS=Homo sapiens OX=9606 GN=CNGA3 PE=1 SV=2	0.0210606	2	K	TVDEKEVLKSLPDK(1)LK(1)	3	-4.0953	7.12435e+06	1	-22.7643	623360	1	19.2497
sp|Q9P2E3|ZNFX1_HUMAN	544	>sp|Q9P2E3|ZNFX1_HUMAN NFX1-type zinc finger-containing protein 1 OS=Homo sapiens OX=9606 GN=ZNFX1 PE=2 SV=2	0.000158158	1	K	NIVECNSHVK(1)EPR	3	0.28096	1	6.14e+06	22.5498	614690	1	19.2295
sp|P52597|HNRPF_HUMAN	87	>sp|P52597|HNRPF_HUMAN Heterogeneous nuclear ribonucleoprotein F OS=Homo sapiens OX=9606 GN=HNRNPF PE=1 SV=3	0.000269404	1	K	YIEVFK(1)SHR	2	0.11238	4.86673e+06	2.93592e+06	-0.729142	614300	1	19.2286
sp|Q99959|PKP2_HUMAN	134	>sp|Q99959|PKP2_HUMAN Plakophilin-2 OS=Homo sapiens OX=9606 GN=PKP2 PE=1 SV=2	0.00766715	1	K	GTAQYSSQK(1)SVEER	3	0.40934	5.15417e+06	5.197e+06	0.0119376	607600	1	19.2128
sp|Q9UHP3|UBP25_HUMAN	721	>sp|Q9UHP3|UBP25_HUMAN Ubiquitin carboxyl-terminal hydrolase 25 OS=Homo sapiens OX=9606 GN=USP25 PE=1 SV=4	0.026217	1	K	LLASQK(1)LR	2	0.37458	4.29505e+06	3.27169e+06	-0.392639	606540	1	19.2102
sp|Q8TAA9|VANG1_HUMAN	513	>sp|Q8TAA9|VANG1_HUMAN Vang-like protein 1 OS=Homo sapiens OX=9606 GN=VANGL1 PE=1 SV=1	0.00147709	1	K	KIPFIILSEEFIDPK(0.469)SHK(0.531)	4	-0.66136	1	1	0	574970	1	19.1331
sp|Q6PIJ6|FBX38_HUMAN	250	>sp|Q6PIJ6|FBX38_HUMAN F-box only protein 38 OS=Homo sapiens OX=9606 GN=FBXO38 PE=1 SV=3	0.000176194	1	K	NCAGPTNSLK(1)YVPLVTGLASAR	3	0.94958	2.00613e+07	1	-24.2579	550420	1	19.0702
sp|P05387|RLA2_HUMAN	24	>sp|P05387|RLA2_HUMAN 60S acidic ribosomal protein P2 OS=Homo sapiens OX=9606 GN=RPLP2 PE=1 SV=1	1.275e-20	1	K	YVASYLLAALGGNSSPSAK(0.113)DIK(0.887)	3	0.54787	5.78654e+06	1	-22.4643	522900	1	18.9962
sp|P62424|RL7A_HUMAN	217	>sp|P62424|RL7A_HUMAN 60S ribosomal protein L7a OS=Homo sapiens OX=9606 GN=RPL7A PE=1 SV=2	4.44779e-18	1	K	TCTTVAFTQVNSEDK(0.001)GALAK(0.999)LVEAIR	4	0.13165	1	853361	19.7028	514310	1	18.9723
sp|O75165|DJC13_HUMAN	1665	>sp|O75165|DJC13_HUMAN DnaJ homolog subfamily C member 13 OS=Homo sapiens OX=9606 GN=DNAJC13 PE=1 SV=5	4.16582e-64	1	K	AELLEFLESQQENMIK(0.609)K(0.391)	3	0.37027	9.20515e+07	1.52656e+07	-2.59216	511160	1	18.9634
sp|P11142|HSP7C_HUMAN	88	>sp|P11142|HSP7C_HUMAN Heat shock cognate 71 kDa protein OS=Homo sapiens OX=9606 GN=HSPA8 PE=1 SV=1	7.80142e-05	1	K	RFDDAVVQSDMK(1)HWPFMVVNDAGRPK	5	0.028918	5.92903e+06	3.49622e+07	2.55993	500480	1	18.933
sp|P49588|SYAC_HUMAN	747	>sp|P49588|SYAC_HUMAN Alanine--tRNA ligase, cytoplasmic OS=Homo sapiens OX=9606 GN=AARS PE=1 SV=2	0.000384973	1	K	NSSHAGAFVIVTEEAIAK(1)GIR	4	-0.04939	2.31628e+07	1.23483e+06	-4.22942	494330	1	18.9151
sp|Q96D71|REPS1_HUMAN	362	>sp|Q96D71|REPS1_HUMAN RalBP1-associated Eps domain-containing protein 1 OS=Homo sapiens OX=9606 GN=REPS1 PE=1 SV=3	0.00133185	1	K	K(0.002)NGYDLPEK(0.998)LPESLMPK	3	-1.8847	1.48422e+07	1	-23.8232	489360	1	18.9005
sp|Q9UKM9|RALY_HUMAN	13	>sp|Q9UKM9|RALY_HUMAN RNA-binding protein Raly OS=Homo sapiens OX=9606 GN=RALY PE=1 SV=1	0.00959202	1	K	LQASNVTNK(0.99)NDPK(0.01)	3	0.23541	2.54216e+06	1.49147e+06	-0.769316	482450	1	18.88
sp|Q8WUM0|NU133_HUMAN	1110	>sp|Q8WUM0|NU133_HUMAN Nuclear pore complex protein Nup133 OS=Homo sapiens OX=9606 GN=NUP133 PE=1 SV=2	3.80069e-06	1	K	LLK(1)DGIQLSEYLPEVK	3	1.2167	3.12941e+07	1.30079e+07	-1.2665	476740	1	18.8628
sp|Q9ULM3|YETS2_HUMAN	1285	>sp|Q9ULM3|YETS2_HUMAN YEATS domain-containing protein 2 OS=Homo sapiens OX=9606 GN=YEATS2 PE=1 SV=2	0.0314531	1	K	KLEDLQQFQK(1)R	3	-1.5895	9.63798e+06	1	-23.2003	467560	1	18.8348
sp|Q12846|STX4_HUMAN	243	>sp|Q12846|STX4_HUMAN Syntaxin-4 OS=Homo sapiens OX=9606 GN=STX4 PE=1 SV=2	0.00370806	1	K	IEK(1)NILSSADYVER	3	0.62328	2.30536e+07	5.14431e+06	-2.16394	463120	1	18.821
sp|O60884|DNJA2_HUMAN	46	>sp|O60884|DNJA2_HUMAN DnaJ homolog subfamily A member 2 OS=Homo sapiens OX=9606 GN=DNAJA2 PE=1 SV=1	3.28026e-07	1	K	EYHPDK(0.242)NPNAGDK(0.753)FK(0.005)	3	1.0787	5.39009e+07	9.48742e+07	0.815706	449440	1	18.7778
sp|Q9H930|SP14L_HUMAN	169	>sp|Q9H930|SP14L_HUMAN Nuclear body protein SP140-like protein OS=Homo sapiens OX=9606 GN=SP140L PE=1 SV=3	0.00794462	1	K	EERPDIK(1)LSLK	3	0.70566	3.43708e+07	3.99839e+07	0.218232	445610	1	18.7654
sp|Q8WVX9|FACR1_HUMAN	63	>sp|Q8WVX9|FACR1_HUMAN Fatty acyl-CoA reductase 1 OS=Homo sapiens OX=9606 GN=FAR1 PE=1 SV=1	0.00366262	1	K	VEEVLSGK(1)LFDR	3	0.48308	6.14938e+06	1	-22.552	441680	1	18.7526
sp|Q709C8|VP13C_HUMAN	3144	>sp|Q709C8|VP13C_HUMAN Vacuolar protein sorting-associated protein 13C OS=Homo sapiens OX=9606 GN=VPS13C PE=1 SV=1	1.89805e-09	1	K	QIILLEQSYQK(1)HQISR	4	0.18298	9.34312e+07	2.2865e+06	-5.35269	441070	1	18.7506
sp|P46977|STT3A_HUMAN	67	>sp|P46977|STT3A_HUMAN Dolichyl-diphosphooligosaccharide--protein glycosyltransferase subunit STT3A OS=Homo sapiens OX=9606 GN=STT3A PE=1 SV=2	6.31211e-07	1	K	FLAEEGFYK(1)FHNWFDDR	3	0.59636	1	3.03378e+06	21.5327	430450	1	18.7155
sp|Q13617|CUL2_HUMAN	16	>sp|Q13617|CUL2_HUMAN Cullin-2 OS=Homo sapiens OX=9606 GN=CUL2 PE=1 SV=2	2.57291e-24	1	K	VVDFDETWNK(1)LLTTIK	3	-0.15257	3.06959e+07	3.29031e+06	-3.22175	427620	1	18.706
sp|P35579|MYH9_HUMAN	299	>sp|P35579|MYH9_HUMAN Myosin-9 OS=Homo sapiens OX=9606 GN=MYH9 PE=1 SV=4	0.000282384	1	K	TDLLLEPYNK(1)YR	3	0.33138	1.28052e+07	1.19563e+07	-0.0989675	424500	1	18.6954
sp|O14964|HGS_HUMAN	56	>sp|O14964|HGS_HUMAN Hepatocyte growth factor-regulated tyrosine kinase substrate OS=Homo sapiens OX=9606 GN=HGS PE=1 SV=1	0.000761427	1	K	VNDK(1)NPHVALYALEVMESVVK	4	0.23091	1	1	0	422100	1	18.6872
sp|Q8N3V7|SYNPO_HUMAN	512	>sp|Q8N3V7|SYNPO_HUMAN Synaptopodin OS=Homo sapiens OX=9606 GN=SYNPO PE=1 SV=2	1.89367e-06	1	K	HFGEK(1)APAPQPPSLPDR	3	1.403	2.4231e+07	1.44496e+07	-0.745827	418340	1	18.6743
sp|P12268|IMDH2_HUMAN	134	>sp|P12268|IMDH2_HUMAN Inosine-5'-monophosphate dehydrogenase 2 OS=Homo sapiens OX=9606 GN=IMPDH2 PE=1 SV=2	0.030446	1	K	DVFEAK(1)AR	2	0.31652	2.78885e+07	2.87417e+07	0.0434788	414620	1	18.6614
sp|P63244|RACK1_HUMAN	44	>sp|P63244|RACK1_HUMAN Receptor of activated protein C kinase 1 OS=Homo sapiens OX=9606 GN=RACK1 PE=1 SV=3	0.00491719	1	K	DKTIIMWK(1)LTR	3	-0.67742	1.87704e+07	1.52882e+07	-0.296033	403650	1	18.6227
sp|O94888|UBXN7_HUMAN	221	>sp|O94888|UBXN7_HUMAN UBX domain-containing protein 7 OS=Homo sapiens OX=9606 GN=UBXN7 PE=1 SV=2	0.000361862	1	K	YIQFYK(1)LGDFPYVSILDPR	3	0.63467	1	6.89551e+06	22.7172	403070	1	18.6207
sp|P62263|RS14_HUMAN	106	>sp|P62263|RS14_HUMAN 40S ribosomal protein S14 OS=Homo sapiens OX=9606 GN=RPS14 PE=1 SV=3	0.00417734	1	K	TK(1)TPGPGAQSALR	3	-1.7435	2.7919e+06	1.23751e+06	-1.17381	398320	1	18.6036
sp|Q8N6U8|GP161_HUMAN	468	>sp|Q8N6U8|GP161_HUMAN G-protein coupled receptor 161 OS=Homo sapiens OX=9606 GN=GPR161 PE=2 SV=1	4.87833e-07	1	K	SLDSYAASLAK(0.999)AIEAEAK(0.001)	3	0.10354	1	1	0	360540	1	18.4598
sp|P78395|PRAME_HUMAN	88	>sp|P78395|PRAME_HUMAN Melanoma antigen preferentially expressed in tumors OS=Homo sapiens OX=9606 GN=PRAME PE=1 SV=1	1.92856e-05	1	K	AMVQAWPFTCLPLGVLMK(0.995)GQHLHLETFK(0.005)	5	-0.28432	1	2.83867e+06	21.4368	357310	1	18.4468
sp|Q8WV83|S35F5_HUMAN	214	>sp|Q8WV83|S35F5_HUMAN Solute carrier family 35 member F5 OS=Homo sapiens OX=9606 GN=SLC35F5 PE=1 SV=1	0.00177404	1	K	QLPSSHALEAK(1)LSR	3	0.69532	1	2.38744e+07	24.509	356870	1	18.445
sp|P63104|1433Z_HUMAN	115	>sp|P63104|1433Z_HUMAN 14-3-3 protein zeta/delta OS=Homo sapiens OX=9606 GN=YWHAZ PE=1 SV=1	1.95772e-05	1	K	FLIPNASQAESK(1)VFYLK	3	-0.1564	4.58584e+06	1	-22.1288	339030	1	18.3711
sp|Q8TCT9|HM13_HUMAN	61	>sp|Q8TCT9|HM13_HUMAN Minor histocompatibility antigen H13 OS=Homo sapiens OX=9606 GN=HM13 PE=1 SV=1	4.84478e-11	1	K	GK(1)NASDMPETITSR	2	-1.4864	2.1262e+07	1.76869e+07	-0.265596	331150	1	18.3371
sp|Q9UNN5|FAF1_HUMAN	575	>sp|Q9UNN5|FAF1_HUMAN FAS-associated factor 1 OS=Homo sapiens OX=9606 GN=FAF1 PE=1 SV=2	0.00139557	1	K	EENAEPVSK(1)LR	3	0.38703	1	1.1663e+07	23.4754	317650	1	18.2771
sp|Q96B26|EXOS8_HUMAN	19	>sp|Q96B26|EXOS8_HUMAN Exosome complex component RRP43 OS=Homo sapiens OX=9606 GN=EXOSC8 PE=1 SV=1	0.0076735	1	K	FLK(1)ENCRPDGR	3	-2.3728	1	1.18276e+07	23.4957	317220	1	18.2751
sp|P60604|UB2G2_HUMAN	153	>sp|P60604|UB2G2_HUMAN Ubiquitin-conjugating enzyme E2 G2 OS=Homo sapiens OX=9606 GN=UBE2G2 PE=1 SV=1	0.000536018	1	K	DDREQFYK(1)IAK	2	0.65905	9.86837e+07	8.83759e+07	-0.159159	289690	1	18.1442
sp|Q02878|RL6_HUMAN	192	>sp|Q02878|RL6_HUMAN 60S ribosomal protein L6 OS=Homo sapiens OX=9606 GN=RPL6 PE=1 SV=3	0.000175799	1	K	THQK(1)FVIATSTK	3	0.14992	7.29172e+06	1.55908e+07	1.09636	288400	1	18.1377
sp|P35869|AHR_HUMAN	88	>sp|P35869|AHR_HUMAN Aryl hydrocarbon receptor OS=Homo sapiens OX=9606 GN=AHR PE=1 SV=2	0.00123847	1	K	SFFDVALK(1)SSPTER	3	0.76971	6.39476e+06	2.3042e+07	1.8493	278320	1	18.0864
sp|Q96FW1|OTUB1_HUMAN	109	>sp|Q96FW1|OTUB1_HUMAN Ubiquitin thioesterase OTUB1 OS=Homo sapiens OX=9606 GN=OTUB1 PE=1 SV=2	1.67778e-66	1	K	AFGFSHLEALLDDSK(1)ELQR	3	0.1122	289815	1.18307e+06	2.02933	270600	1	18.0458
sp|O43747|AP1G1_HUMAN	546	>sp|O43747|AP1G1_HUMAN AP-1 complex subunit gamma-1 OS=Homo sapiens OX=9606 GN=AP1G1 PE=1 SV=5	8.10613e-25	1	K	K(1)VVSIYGSSIDVELQQR	3	1.184	9.38649e+07	2.28372e+07	-2.0392	267790	1	18.0307
sp|O75165|DJC13_HUMAN	983	>sp|O75165|DJC13_HUMAN DnaJ homolog subfamily C member 13 OS=Homo sapiens OX=9606 GN=DNAJC13 PE=1 SV=5	4.01429e-88	1	K	ESEKEWYFGNADK(1)ER	2	0.43081	5.43288e+08	5.51764e+08	0.0223341	254600	1	17.9579
sp|Q14152|EIF3A_HUMAN	75	>sp|Q14152|EIF3A_HUMAN Eukaryotic translation initiation factor 3 subunit A OS=Homo sapiens OX=9606 GN=EIF3A PE=1 SV=1	0.00061297	1	K	EGLYQYK(1)NICQQVNIK	3	-0.23124	4.39387e+07	1.13738e+06	-5.2717	249450	1	17.9284
sp|P55072|TERA_HUMAN	529	>sp|P55072|TERA_HUMAN Transitional endoplasmic reticulum ATPase OS=Homo sapiens OX=9606 GN=VCP PE=1 SV=4	0.000181457	1	K	TLLAK(1)AIANECQANFISIK	3	0.78366	2.56311e+07	1.38888e+06	-4.20591	248850	1	17.9249
sp|Q9Y6I3|EPN1_HUMAN	86	>sp|Q9Y6I3|EPN1_HUMAN Epsin-1 OS=Homo sapiens OX=9606 GN=EPN1 PE=1 SV=2	0.000888819	1	K	AMTLMEYLIK(1)TGSER	3	-0.88792	713570	2.1696e+06	1.6043	248350	1	17.922
sp|Q9NQC3|RTN4_HUMAN	1171	>sp|Q9NQC3|RTN4_HUMAN Reticulon-4 OS=Homo sapiens OX=9606 GN=RTN4 PE=1 SV=2	0.00027071	1	K	HQAQIDHYLGLANK(0.817)NVK(0.183)	3	1.0485	6.66983e+07	4.28672e+07	-0.637776	246920	1	17.9137
sp|Q14534|ERG1_HUMAN	290	>sp|Q14534|ERG1_HUMAN Squalene monooxygenase OS=Homo sapiens OX=9606 GN=SQLE PE=1 SV=3	1.67752e-05	1	K	ELHAPLTVVADGLFSK(1)FR	4	-1.5729	1	1	0	245860	1	17.9075
sp|P46934|NEDD4_HUMAN	916	>sp|P46934|NEDD4_HUMAN E3 ubiquitin-protein ligase NEDD4 OS=Homo sapiens OX=9606 GN=NEDD4 PE=1 SV=4	0.0125065	1	K	IFYINHNIK(1)R	3	1.4538	1.76642e+07	1.49209e+06	-3.56543	235580	1	17.8459
sp|P15311|EZRI_HUMAN;sp|P26038|MOES_HUMAN;sp|P35241|RADI_HUMAN	237;237;237	>sp|P15311|EZRI_HUMAN Ezrin OS=Homo sapiens OX=9606 GN=EZR PE=1 SV=4;>sp|P26038|MOES_HUMAN Moesin OS=Homo sapiens OX=9606 GN=MSN PE=1 SV=3;>sp|P35241|RADI_HUMAN Radixin OS=Homo sapiens OX=9606 GN=RDX PE=1 SV=1	0.000225452	1	K	LTPK(1)IGFPWSEIR	3	-0.31812	4.78755e+07	233785	-7.67797	214130	1	17.7081
sp|O75165|DJC13_HUMAN	1356	>sp|O75165|DJC13_HUMAN DnaJ homolog subfamily C member 13 OS=Homo sapiens OX=9606 GN=DNAJC13 PE=1 SV=5	4.53028e-33	1;2	K	AYEFLCTK(1)SAK(1)IVDGPDPENIILILK	4	0.2563	2.58393e+08	3.29834e+08	0.352175	191230	1	17.5449
sp|Q96PD2|DCBD2_HUMAN	772	>sp|Q96PD2|DCBD2_HUMAN Discoidin, CUB and LCCL domain-containing protein 2 OS=Homo sapiens OX=9606 GN=DCBLD2 PE=1 SV=1	0.01147	1	K	DGECDVFK(1)EIL	2	-0.062567	4.08299e+06	2.90041e+06	-0.493368	183940	1	17.4889
sp|Q9NZM3|ITSN2_HUMAN	583	>sp|Q9NZM3|ITSN2_HUMAN Intersectin-2 OS=Homo sapiens OX=9606 GN=ITSN2 PE=1 SV=3	5.24571e-05	1	K	NMQFSNTPDSGVSLLHK(0.819)K(0.181)	4	-0.79424	4.34482e+07	2.69996e+07	-0.686358	179270	1	17.4518
sp|Q92621|NU205_HUMAN	44	>sp|Q92621|NU205_HUMAN Nuclear pore complex protein Nup205 OS=Homo sapiens OX=9606 GN=NUP205 PE=1 SV=3	0.00186943	1	K	RQPEAVHLLDK(0.18)ILK(0.82)	4	0.055293	1	1.99508e+07	24.2499	175430	1	17.4205
sp|Q969T9|WBP2_HUMAN	64	>sp|Q969T9|WBP2_HUMAN WW domain-binding protein 2 OS=Homo sapiens OX=9606 GN=WBP2 PE=1 SV=1	0.000683634	1	K	GK(1)DAMQSFMMPFYLMK	3	-1.4582	1	1	0	165500	1	17.3365
sp|Q99873|ANM1_HUMAN	332	>sp|Q99873|ANM1_HUMAN Protein arginine N-methyltransferase 1 OS=Homo sapiens OX=9606 GN=PRMT1 PE=1 SV=2	7.30897e-05	1	K	TGEEIFGTIGMRPNAK(1)NNR	4	0.30611	3.95972e+07	2.38209e+07	-0.733168	159930	1	17.2871
sp|Q9Y2V2|CHSP1_HUMAN	64	>sp|Q9Y2V2|CHSP1_HUMAN Calcium-regulated heat-stable protein 1 OS=Homo sapiens OX=9606 GN=CARHSP1 PE=1 SV=2	0.0117183	1	K	ASQGPVYK(0.985)GVCK(0.015)	3	3.6158	2.81126e+07	1	-24.7447	158460	1	17.2738
sp|Q9NYL2|M3K20_HUMAN	304	>sp|Q9NYL2|M3K20_HUMAN Mitogen-activated protein kinase kinase kinase 20 OS=Homo sapiens OX=9606 GN=MAP3K20 PE=1 SV=3	1.19018e-07	1	K	DLSFK(1)EQELK	2	-0.36258	5.64159e+07	4.72673e+07	-0.255258	144050	1	17.1362
sp|Q13435|SF3B2_HUMAN	570	>sp|Q13435|SF3B2_HUMAN Splicing factor 3B subunit 2 OS=Homo sapiens OX=9606 GN=SF3B2 PE=1 SV=2	0.000486894	1	K	IDIDYQK(1)LHDAFFK	4	-0.44852	1.77763e+07	1.01505e+06	-4.13033	141620	1	17.1117
sp|P49915|GUAA_HUMAN	389	>sp|P49915|GUAA_HUMAN GMP synthase [glutamine-hydrolyzing] OS=Homo sapiens OX=9606 GN=GMPS PE=1 SV=1	0.000142677	1	K	AELIK(1)THHNDTELIR	4	-0.099064	1.23011e+07	2.212e+07	0.846563	141240	1	17.1078
sp|P50416|CPT1A_HUMAN	195	>sp|P50416|CPT1A_HUMAN Carnitine O-palmitoyltransferase 1, liver isoform OS=Homo sapiens OX=9606 GN=CPT1A PE=1 SV=2	0.000484556	1	K	YLQSVRPLMK(0.999)EEDFK(0.001)R	4	-0.88611	2.712e+07	2.49981e+07	-0.117537	137860	1	17.0728
sp|Q6P2Q9|PRP8_HUMAN	1443	>sp|Q6P2Q9|PRP8_HUMAN Pre-mRNA-processing-splicing factor 8 OS=Homo sapiens OX=9606 GN=PRPF8 PE=1 SV=2	0.0191432	1	K	TDFK(1)QYQVLK	3	-0.53972	1	9.93762e+06	23.2445	135430	1	17.0472
sp|Q7Z6Z7|HUWE1_HUMAN	2172	>sp|Q7Z6Z7|HUWE1_HUMAN E3 ubiquitin-protein ligase HUWE1 OS=Homo sapiens OX=9606 GN=HUWE1 PE=1 SV=3	6.80712e-05	1	K	ALAMAESTEK(1)HAR	3	-0.53014	1	5.21572e+06	22.3144	134790	1	17.0404
sp|P55072|TERA_HUMAN	217	>sp|P55072|TERA_HUMAN Transitional endoplasmic reticulum ATPase OS=Homo sapiens OX=9606 GN=VCP PE=1 SV=4	0.0312394		K	QLAQIK(1)EMVELPLR	3	-0.50064	1	1	0	127870	1	16.9643
sp|Q16832|DDR2_HUMAN	720	>sp|Q16832|DDR2_HUMAN Discoidin domain-containing receptor 2 OS=Homo sapiens OX=9606 GN=DDR2 PE=1 SV=2	0.0171206	1	K	NCLVGK(0.927)NYTIK(0.073)	3	-1.6467	1	9.24107e+06	23.1396	124780	1	16.929
sp|Q8WUM9|S20A1_HUMAN	389	>sp|Q8WUM9|S20A1_HUMAN Sodium-dependent phosphate transporter 1 OS=Homo sapiens OX=9606 GN=SLC20A1 PE=1 SV=1	0.000394234	1	K	DSGLYK(1)ELLHK	3	0.38309	1.36169e+08	5.54347e+07	-1.29654	119890	1	16.8714
sp|P45974|UBP5_HUMAN	553	>sp|P45974|UBP5_HUMAN Ubiquitin carboxyl-terminal hydrolase 5 OS=Homo sapiens OX=9606 GN=USP5 PE=1 SV=2	1.05908e-23	1	K	AQVPFSSCLEAYGAPEQVDDFWSTALQAK(0.976)SVAVK(0.024)	4	-0.054063	1.05869e+07	1.3577e+07	0.358881	106280	1	16.6975
sp|O60291|MGRN1_HUMAN	101	>sp|O60291|MGRN1_HUMAN E3 ubiquitin-protein ligase MGRN1 OS=Homo sapiens OX=9606 GN=MGRN1 PE=1 SV=2	0.00242146	1	K	YK(1)DDADSPTEDGDKPR	4	-0.0021195	1	2.01648e+06	20.9434	105910	1	16.6925
sp|Q9Y225|RNF24_HUMAN	97	>sp|Q9Y225|RNF24_HUMAN RING finger protein 24 OS=Homo sapiens OX=9606 GN=RNF24 PE=1 SV=1	2.68287e-08	1	K	DELGICPCK(1)HAFHR	3	-0.94943	5.64028e+07	5.13381e+07	-0.135735	99815	1	16.607
sp|P23497|SP100_HUMAN	219	>sp|P23497|SP100_HUMAN Nuclear autoantigen Sp-100 OS=Homo sapiens OX=9606 GN=SP100 PE=1 SV=3	2.85284e-47	1	K	RK(0.995)DTTSDK(0.005)DDSLGSQQTNEQCAQK	4	-0.065946	2.46837e+06	8.80096e+06	1.8341	95775	1	16.5474
sp|P55957|BID_HUMAN	158	>sp|P55957|BID_HUMAN BH3-interacting domain death agonist OS=Homo sapiens OX=9606 GN=BID PE=1 SV=1	0.00552521	1	K	K(1)VASHTPSLLR	3	0.56799	7.03295e+06	5.09996e+06	-0.463645	93661	1	16.5152
sp|Q9ULV4|COR1C_HUMAN	413	>sp|Q9ULV4|COR1C_HUMAN Coronin-1C OS=Homo sapiens OX=9606 GN=CORO1C PE=1 SV=1	0.00134078	1	K	NILDSK(0.998)PTANK(0.002)K	3	0.22454	1.13679e+07	4.10859e+06	-1.46825	87927	1	16.424
sp|P35580|MYH10_HUMAN	817	>sp|P35580|MYH10_HUMAN Myosin-10 OS=Homo sapiens OX=9606 GN=MYH10 PE=1 SV=3	0.00112229	1	K	QQQLSALK(1)VLQR	3	0.45247	1	3.23248e+07	24.9461	84865	1	16.3729
sp|Q14596|NBR1_HUMAN	767	>sp|Q14596|NBR1_HUMAN Next to BRCA1 gene 1 protein OS=Homo sapiens OX=9606 GN=NBR1 PE=1 SV=3	0.000667039	1	K	GAEGK(1)PGVEAGQEPAEAGER	3	-0.44478	4.99044e+06	86573	-5.8491	58080	1	15.8258
sp|Q6NZI2|CAVN1_HUMAN	173	>sp|Q6NZI2|CAVN1_HUMAN Caveolae-associated protein 1 OS=Homo sapiens OX=9606 GN=CAVIN1 PE=1 SV=1	0.000765963	1	K	SLK(1)ESEALPEK	3	-0.21928	2.26679e+07	18686.1	-10.2445	56312	1	15.7812
sp|Q63HQ0|AP1AR_HUMAN	93	>sp|Q63HQ0|AP1AR_HUMAN AP-1 complex-associated regulatory protein OS=Homo sapiens OX=9606 GN=AP1AR PE=1 SV=1	0.00460213	1	K	IQK(1)ELALQEEK	3	1.5938	6.78422e+06	109643	-5.9513	51761	1	15.6596
sp|Q15075|EEA1_HUMAN	1312	>sp|Q15075|EEA1_HUMAN Early endosome antigen 1 OS=Homo sapiens OX=9606 GN=EEA1 PE=1 SV=2	0.00268498	1	K	LQTK(1)VLELQR	3	0.91015	3.63895e+07	136984	-8.05337	45561	1	15.4755
sp|P27708|PYR1_HUMAN	1460	>sp|P27708|PYR1_HUMAN CAD protein OS=Homo sapiens OX=9606 GN=CAD PE=1 SV=3	6.08689e-05	1	K	VHVDCMTSQK(1)LVR	3	0.57551	2.20508e+07	7.84129e+06	-1.49167	33080	1	15.0137
sp|Q9UIG8|SO3A1_HUMAN	313	>sp|Q9UIG8|SO3A1_HUMAN Solute carrier organic anion transporter family member 3A1 OS=Homo sapiens OX=9606 GN=SLCO3A1 PE=1 SV=3	0.000377014	1	K	EYERPK(1)PSNGVLR	3	0.74269	1	1.6839e+07	24.0053	18347	1	14.1633
sp|Q6UVK1|CSPG4_HUMAN	2263	>sp|Q6UVK1|CSPG4_HUMAN Chondroitin sulfate proteoglycan 4 OS=Homo sapiens OX=9606 GN=CSPG4 PE=1 SV=2	3.34394e-10	1	K	HDVQVLTAK(1)PR	3	0.19808	2.08094e+08	1.13481e+08	-0.874782	16125	1	13.977
sp|Q96S55|WRIP1_HUMAN	633	>sp|Q96S55|WRIP1_HUMAN ATPase WRNIP1 OS=Homo sapiens OX=9606 GN=WRNIP1 PE=1 SV=2	0.0442598	1	K	DLGYGK(0.989)GYK(0.011)	2	0.94995	9.62648e+07	6.65564e+07	-0.532431	110780000	35027.4	11.6269
sp|Q6NT16|S18B1_HUMAN	437	>sp|Q6NT16|S18B1_HUMAN MFS-type transporter SLC18B1 OS=Homo sapiens OX=9606 GN=SLC18B1 PE=1 SV=1	1.01944e-17	1	K	SK(1)SQNILSTEEER	2	-0.22061	2.40564e+07	4.40578e+07	0.872977	63468000	113342	9.1292
sp|P40227|TCPZ_HUMAN	127	>sp|P40227|TCPZ_HUMAN T-complex protein 1 subunit zeta OS=Homo sapiens OX=9606 GN=CCT6A PE=1 SV=3	9.80145e-05	1	K	IITEGFEAAK(0.646)EK(0.354)	3	1.2052	6.99206e+07	47587.3	-10.5209	83634000	164011	8.99416
sp|Q6ZTN6|AN13D_HUMAN	169	>sp|Q6ZTN6|AN13D_HUMAN Ankyrin repeat domain-containing protein 13D OS=Homo sapiens OX=9606 GN=ANKRD13D PE=1 SV=2	0.000730163	1	K	SEK(1)METVSGYEAK	3	-0.68868	2.04848e+07	2.1484e+07	0.0687083	10296000	23102.7	8.7998
sp|O95372|LYPA2_HUMAN	108	>sp|O95372|LYPA2_HUMAN Acyl-protein thioesterase 2 OS=Homo sapiens OX=9606 GN=LYPLA2 PE=1 SV=1	0.00075475	1	K	ALIEHEMK(1)NGIPANR	3	0.38357	4.99102e+06	6.58783e+06	0.400468	49500000	126298	8.61445
sp|P62241|RS8_HUMAN	128	>sp|P62241|RS8_HUMAN 40S ribosomal protein S8 OS=Homo sapiens OX=9606 GN=RPS8 PE=1 SV=2	0.000678613	1	K	GAK(1)LTPEEEEILNK	2	-0.26969	3.20771e+07	1.18492e+07	-1.43675	50072000	140486	8.47743
sp|P04350|TBB4A_HUMAN;sp|P07437|TBB5_HUMAN;sp|A6NNZ2|TBB8L_HUMAN;sp|Q9H4B7|TBB1_HUMAN;CON__ENSEMBL:ENSBTAP00000025008;sp|P68371|TBB4B_HUMAN;sp|Q13509|TBB3_HUMAN;sp|Q13885|TBB2A_HUMAN;sp|Q9BVA1|TBB2B_HUMAN;sp|Q3ZCM7|TBB8_HUMAN;sp|Q9BUF5|TBB6_HUMAN	252;252;252;252;338;252;252;252;252;252;252	>sp|P04350|TBB4A_HUMAN Tubulin beta-4A chain OS=Homo sapiens OX=9606 GN=TUBB4A PE=1 SV=2;>sp|P07437|TBB5_HUMAN Tubulin beta chain OS=Homo sapiens OX=9606 GN=TUBB PE=1 SV=2;>sp|A6NNZ2|TBB8L_HUMAN Tubulin beta-8 chain-like protein LOC260334 OS=Homo sapiens O	2.27983e-24	1	K	K(1)LAVNMVPFPR	3	-0.98753	4.18618e+08	4.90959e+08	0.229967	65668000	188231	8.44654
sp|Q86YT6|MIB1_HUMAN	854	>sp|Q86YT6|MIB1_HUMAN E3 ubiquitin-protein ligase MIB1 OS=Homo sapiens OX=9606 GN=MIB1 PE=1 SV=1	0.00133653	1	K	CLICK(1)EQVQSR	2	-0.35332	1.21599e+07	1.60127e+07	0.397083	36112000	104998	8.42597
sp|O15155|BET1_HUMAN	58	>sp|O15155|BET1_HUMAN BET1 homolog OS=Homo sapiens OX=9606 GN=BET1 PE=1 SV=1	0.00041397	1	K	SLSIEIGHEVK(0.955)TQNK(0.045)	3	1.5178	2.02272e+07	1.39176e+07	-0.539389	26266000	81957.6	8.3241
sp|Q99442|SEC62_HUMAN	19	>sp|Q99442|SEC62_HUMAN Translocation protein SEC62 OS=Homo sapiens OX=9606 GN=SEC62 PE=1 SV=1	0.000559782	1	K	IQEVGEPSK(0.988)EEK(0.012)	2	1.0832	2.42369e+06	4.09532e+07	4.0787	71648000	231040	8.27664
sp|P63104|1433Z_HUMAN	85	>sp|P63104|1433Z_HUMAN 14-3-3 protein zeta/delta OS=Homo sapiens OX=9606 GN=YWHAZ PE=1 SV=1	0.014587	1	K	EK(1)IETELR	2	0.002455	5.93121e+07	179740	-8.36627	192850000	658523	8.19403
sp|Q9BUT1|BDH2_HUMAN	48	>sp|Q9BUT1|BDH2_HUMAN 3-hydroxybutyrate dehydrogenase type 2 OS=Homo sapiens OX=9606 GN=BDH2 PE=1 SV=2	0.00482398	1	K	LQELEK(1)YPGIQTR	3	-0.68586	1.22539e+07	1.22475e+07	-0.000759866	26971000	104504	8.0117
sp|Q13200|PSMD2_HUMAN	397	>sp|Q13200|PSMD2_HUMAN 26S proteasome non-ATPase regulatory subunit 2 OS=Homo sapiens OX=9606 GN=PSMD2 PE=1 SV=3	0.000256208	1	K	LLTDDGNK(1)WLYK	3	-0.16148	6.2156e+07	5.35125e+07	-0.216018	36436000	153806	7.8881
sp|Q8IVM0|CCD50_HUMAN	107	>sp|Q8IVM0|CCD50_HUMAN Coiled-coil domain-containing protein 50 OS=Homo sapiens OX=9606 GN=CCDC50 PE=1 SV=1	0.00875286	1	K	IQEK(0.5)K(0.5)DEDIAR	3	1.0563	1.08959e+06	32639.7	-5.06101	4989000	23580.6	7.72501
sp|Q8IVM0|CCD50_HUMAN	108	>sp|Q8IVM0|CCD50_HUMAN Coiled-coil domain-containing protein 50 OS=Homo sapiens OX=9606 GN=CCDC50 PE=1 SV=1	0.00875286	1	K	IQEK(0.17)K(0.83)DEDIAR	3	-0.025779	1.08959e+06	32639.7	-5.06101	4989000	23580.6	7.72501
sp|Q08945|SSRP1_HUMAN	100	>sp|Q08945|SSRP1_HUMAN FACT complex subunit SSRP1 OS=Homo sapiens OX=9606 GN=SSRP1 PE=1 SV=1	5.46563e-06	1	K	LELMEK(1)DLCVK	3	-0.10771	1.98867e+07	5.58031e+07	1.48854	11584000	60205.2	7.58803
sp|Q01831|XPC_HUMAN	619	>sp|Q01831|XPC_HUMAN DNA repair protein complementing XP-C cells OS=Homo sapiens OX=9606 GN=XPC PE=1 SV=4	0.0157588	1	K	EK(0.956)K(0.044)EDLEFQAK	3	0.61155	2.32443e+07	1.79174e+07	-0.375513	23002000	122400	7.55401
sp|Q96A65|EXOC4_HUMAN	140	>sp|Q96A65|EXOC4_HUMAN Exocyst complex component 4 OS=Homo sapiens OX=9606 GN=EXOC4 PE=1 SV=1	2.59255e-05	1	K	QVPQK(1)LEQCMASK	3	0.34754	2.83207e+07	3.1444e+07	0.150925	29043000	159318	7.51014
sp|P61956|SUMO2_HUMAN	21	>sp|P61956|SUMO2_HUMAN Small ubiquitin-related modifier 2 OS=Homo sapiens OX=9606 GN=SUMO2 PE=1 SV=3	2.74421e-05	1	K	TENNDHINLK(1)VAGQDGSVVQFK	3	0.69334	2.71797e+07	1	-24.696	52341000	301600	7.43916
sp|Q15843|NEDD8_HUMAN	22	>sp|Q15843|NEDD8_HUMAN NEDD8 OS=Homo sapiens OX=9606 GN=NEDD8 PE=1 SV=1	5.5355e-05	1	K	EIEIDIEPTDK(1)VER	3	-0.15648	3.07047e+07	1.8542e+07	-0.727659	31842000	219907	7.17789
sp|Q14739|LBR_HUMAN	186	>sp|Q14739|LBR_HUMAN Lamin-B receptor OS=Homo sapiens OX=9606 GN=LBR PE=1 SV=2	0.0118692	1	K	EIDSK(0.007)EEK(0.99)YVAK(0.003)	3	2.5395	1	5.90702e+06	22.494	4134700	32126.3	7.00788
sp|P21796|VDAC1_HUMAN	109	>sp|P21796|VDAC1_HUMAN Voltage-dependent anion-selective channel protein 1 OS=Homo sapiens OX=9606 GN=VDAC1 PE=1 SV=2	9.62063e-19	1	K	LTFDSSFSPNTGK(0.841)K(0.159)	3	0.25616	6.47073e+07	5.59183e+07	-0.210607	16376000	127618	7.00361
sp|Q13098|CSN1_HUMAN	422	>sp|Q13098|CSN1_HUMAN COP9 signalosome complex subunit 1 OS=Homo sapiens OX=9606 GN=GPS1 PE=1 SV=4	0.000705425	1	K	VDSHSK(1)ILYAR	3	-0.92152	1	1	0	12022000	104590	6.84479
sp|O15294|OGT1_HUMAN	716	>sp|O15294|OGT1_HUMAN UDP-N-acetylglucosamine--peptide N-acetylglucosaminyltransferase 110 kDa subunit OS=Homo sapiens OX=9606 GN=OGT PE=1 SV=3	7.6773e-10	1	K	LAYMPHTFFIGDHANMFPHLK(0.5)K(0.5)	5	0.70669	1	1	0	46827000	408908	6.83942
sp|O15294|OGT1_HUMAN	717	>sp|O15294|OGT1_HUMAN UDP-N-acetylglucosamine--peptide N-acetylglucosaminyltransferase 110 kDa subunit OS=Homo sapiens OX=9606 GN=OGT PE=1 SV=3	7.6773e-10	1	K	LAYMPHTFFIGDHANMFPHLK(0.5)K(0.5)	5	0.70669	1	1	0	46827000	408908	6.83942
sp|P20700|LMNB1_HUMAN	209	>sp|P20700|LMNB1_HUMAN Lamin-B1 OS=Homo sapiens OX=9606 GN=LMNB1 PE=1 SV=2	3.22848e-10	1	K	K(1)SMYEEEINETR	2	0.8005	3.97922e+06	2.51257e+06	-0.66332	67004000	591811	6.82297
sp|Q86XE3|MICU3_HUMAN	274	>sp|Q86XE3|MICU3_HUMAN Calcium uptake protein 3, mitochondrial OS=Homo sapiens OX=9606 GN=MICU3 PE=2 SV=1	0.0392721	1	K	REIK(0.996)GDEEK(0.004)	2	-0.34034	1.09634e+09	1.25335e+09	0.193097	25097000	225125	6.80065
sp|P63092|GNAS2_HUMAN;sp|Q5JWF2|GNAS1_HUMAN;sp|P38405|GNAL_HUMAN	216;859;203	>sp|P63092|GNAS2_HUMAN Guanine nucleotide-binding protein G(s) subunit alpha isoforms short OS=Homo sapiens OX=9606 GN=GNAS PE=1 SV=1;>sp|Q5JWF2|GNAS1_HUMAN Guanine nucleotide-binding protein G(s) subunit alpha isoforms XLas OS=Homo sapiens OX=9606 GN=GNAS	4.02454e-05	1	K	FQVDK(1)VNFHMFDVGGQRDER	5	-0.31003	3.58888e+07	4.47915e+07	0.319689	25195000	229708	6.77719
sp|P38435|VKGC_HUMAN	19	>sp|P38435|VKGC_HUMAN Vitamin K-dependent gamma-carboxylase OS=Homo sapiens OX=9606 GN=GGCX PE=1 SV=2	1.56438e-13	1	K	TSPSSDK(0.001)VQK(0.954)DK(0.045)AELISGPR	4	-1.1398	2.08894e+07	4.33056e+07	1.05178	49057000	450189	6.76779
sp|P54727|RD23B_HUMAN	60	>sp|P54727|RD23B_HUMAN UV excision repair protein RAD23 homolog B OS=Homo sapiens OX=9606 GN=RAD23B PE=1 SV=1	1.10803e-11	1	K	ILNDDTALK(0.995)EYK(0.005)	2	1.0646	8.11694e+07	7.85507e+07	-0.0473107	51800000	480386	6.75262
sp|P62847|RS24_HUMAN	83	>sp|P62847|RS24_HUMAN 40S ribosomal protein S24 OS=Homo sapiens OX=9606 GN=RPS24 PE=1 SV=1	9.01611e-12	1	K	TTGFGMIYDSLDYAK(0.84)K(0.16)	3	0.79416	5.37292e+07	2.72795e+07	-0.977889	63476000	600512	6.72387
sp|P08670|VIME_HUMAN	373	>sp|P08670|VIME_HUMAN Vimentin OS=Homo sapiens OX=9606 GN=VIM PE=1 SV=4	0.000395768	1	K	LQDEIQNMK(1)EEMAR	3	-0.41576	1.75638e+07	2.52564e+07	0.524043	89081000	931833	6.5789
sp|Q9H2M9|RBGPR_HUMAN	1363	>sp|Q9H2M9|RBGPR_HUMAN Rab3 GTPase-activating protein non-catalytic subunit OS=Homo sapiens OX=9606 GN=RAB3GAP2 PE=1 SV=1	0.00561891	1	K	LVNK(1)VIELLPEK	3	-0.22722	2.31817e+07	2.71725e+06	-3.09277	22122000	247378	6.48262
sp|Q9H0D6|XRN2_HUMAN	533	>sp|Q9H0D6|XRN2_HUMAN 5'-3' exoribonuclease 2 OS=Homo sapiens OX=9606 GN=XRN2 PE=1 SV=1	0.000636999	1	K	NKFDVDAADEK(1)FR	3	-0.62144	1	7.49234e+06	22.837	21720000	247977	6.45267
sp|P05783|K1C18_HUMAN	247	>sp|P05783|K1C18_HUMAN Keratin, type I cytoskeletal 18 OS=Homo sapiens OX=9606 GN=KRT18 PE=1 SV=2	0.000140744	1	K	SQDLAK(1)IMADIR	3	0.21372	3.83223e+07	2.95855e+07	-0.37329	4841600	56862.9	6.41185
sp|P46781|RS9_HUMAN	155	>sp|P46781|RS9_HUMAN 40S ribosomal protein S9 OS=Homo sapiens OX=9606 GN=RPS9 PE=1 SV=3	0.000602718	1	K	LDSQK(1)HIDFSLR	3	2.3014	3.50301e+07	3.52658e+07	0.0096718	47296000	559342	6.40184
sp|P57729|RAB38_HUMAN	194	>sp|P57729|RAB38_HUMAN Ras-related protein Rab-38 OS=Homo sapiens OX=9606 GN=RAB38 PE=1 SV=1	7.61893e-10	1	K	HILANECDLMESIEPDVVK(0.975)PHLTSTK(0.025)	4	-0.90426	1	1	0	45335000	537431	6.3984
sp|Q9H2P0|ADNP_HUMAN	807	>sp|Q9H2P0|ADNP_HUMAN Activity-dependent neuroprotector homeobox protein OS=Homo sapiens OX=9606 GN=ADNP PE=1 SV=1	0.00839925	1	K	SDIASHFSNK(1)R	3	0.46548	1.70617e+07	9.27585e+06	-0.879211	7398500	90827.2	6.34796
sp|Q15022|SUZ12_HUMAN	341	>sp|Q15022|SUZ12_HUMAN Polycomb protein SUZ12 OS=Homo sapiens OX=9606 GN=SUZ12 PE=1 SV=3	0.00960096	1	K	ATWETILDGK(1)R	3	-3.7193	1	2.96771e+06	21.5009	11131000	137162	6.34256
sp|P20339|RAB5A_HUMAN;sp|P51148|RAB5C_HUMAN	116;117	>sp|P20339|RAB5A_HUMAN Ras-related protein Rab-5A OS=Homo sapiens OX=9606 GN=RAB5A PE=1 SV=2;>sp|P51148|RAB5C_HUMAN Ras-related protein Rab-5C OS=Homo sapiens OX=9606 GN=RAB5C PE=1 SV=2	0.0072232	1	K	NWVK(1)ELQR	2	0.19769	5.71348e+07	2.5064e+07	-1.18875	10935000	141745	6.26951
sp|O75165|DJC13_HUMAN	1158	>sp|O75165|DJC13_HUMAN DnaJ homolog subfamily C member 13 OS=Homo sapiens OX=9606 GN=DNAJC13 PE=1 SV=5	0.000141351	1	K	SEETK(1)GQDIFQR	2	-0.3435	5.84869e+07	5.85115e+07	0.0006062	11301000	150544	6.23013
sp|Q14156|EFR3A_HUMAN	39	>sp|Q14156|EFR3A_HUMAN Protein EFR3 homolog A OS=Homo sapiens OX=9606 GN=EFR3A PE=1 SV=2	4.42282e-11	1	K	TDMEK(1)LTFYAVSAPEKLDR	3	-0.072871	1	1.31921e+06	20.3312	67354000	922668	6.18981
sp|Q14974|IMB1_HUMAN	537	>sp|Q14974|IMB1_HUMAN Importin subunit beta-1 OS=Homo sapiens OX=9606 GN=KPNB1 PE=1 SV=2	3.13584e-35	1	K	SSAYESLMEIVK(0.947)NSAK(0.053)	3	-0.090976	1	1.84638e+07	24.1382	24564000	339325	6.17773
sp|Q8N1F7|NUP93_HUMAN	59	>sp|Q8N1F7|NUP93_HUMAN Nuclear pore complex protein Nup93 OS=Homo sapiens OX=9606 GN=NUP93 PE=1 SV=2	2.45306e-16	1	K	TSQETADVK(1)ASVLLGSR	2	-0.48232	9.39624e+07	7.413e+07	-0.342025	18980000	262972	6.17343
sp|P63167|DYL1_HUMAN;sp|Q96FJ2|DYL2_HUMAN	49;49	>sp|P63167|DYL1_HUMAN Dynein light chain 1, cytoplasmic OS=Homo sapiens OX=9606 GN=DYNLL1 PE=1 SV=1;>sp|Q96FJ2|DYL2_HUMAN Dynein light chain 2, cytoplasmic OS=Homo sapiens OX=9606 GN=DYNLL2 PE=1 SV=1	0.000121597	1	K	K(1)YNPTWHCIVGR	3	-1.2806	1	1	0	29022000	402456	6.17217
sp|Q9H6H4|REEP4_HUMAN	111	>sp|Q9H6H4|REEP4_HUMAN Receptor expression-enhancing protein 4 OS=Homo sapiens OX=9606 GN=REEP4 PE=1 SV=1	0.00641848	1	K	EIDAYIVQAK(1)ER	3	4.1444	1	1.02824e+07	23.2937	14246000	200464	6.15107
sp|Q9P2I0|CPSF2_HUMAN	386	>sp|Q9P2I0|CPSF2_HUMAN Cleavage and polyadenylation specificity factor subunit 2 OS=Homo sapiens OX=9606 GN=CPSF2 PE=1 SV=2	0.00137193	1	K	VK(0.799)LEGK(0.201)ELEEYLEKEK	4	-1.9882	1.61288e+07	2.41749e+07	0.583872	21883000	308016	6.15066
sp|Q9C004|SPY4_HUMAN	144	>sp|Q9C004|SPY4_HUMAN Protein sprouty homolog 4 OS=Homo sapiens OX=9606 GN=SPRY4 PE=1 SV=2	1.6827e-17	1	K	VVHCQPLDLK(1)GPAVPPELDKHFLLCEACGK	5	-0.51174	1	1	0	41766000	594011	6.1357
sp|Q9Y4X5|ARI1_HUMAN	144	>sp|Q9Y4X5|ARI1_HUMAN E3 ubiquitin-protein ligase ARIH1 OS=Homo sapiens OX=9606 GN=ARIH1 PE=1 SV=2	4.1447e-24	1	K	ILLSHFNWDK(0.033)EK(0.967)LMER	4	0.022797	1.60953e+07	2.85514e+07	0.826919	24711000	374055	6.04576
sp|P60660|MYL6_HUMAN;sp|P14649|MYL6B_HUMAN	50;107	>sp|P60660|MYL6_HUMAN Myosin light polypeptide 6 OS=Homo sapiens OX=9606 GN=MYL6 PE=1 SV=2;>sp|P14649|MYL6B_HUMAN Myosin light chain 6B OS=Homo sapiens OX=9606 GN=MYL6B PE=1 SV=1	6.01145e-59	1	K	ALGQNPTNAEVLK(1)VLGNPK	3	0.14184	2.24962e+08	1.99178e+08	-0.17562	39259000	602957	6.02483
sp|O75970|MPDZ_HUMAN	2022	>sp|O75970|MPDZ_HUMAN Multiple PDZ domain protein OS=Homo sapiens OX=9606 GN=MPDZ PE=1 SV=2	0.000419891	1	K	TVFAK(1)GAASEDGR	3	1.2901	2.74329e+07	1.28248e+07	-1.09698	4748800	73798	6.00784
sp|P20020|AT2B1_HUMAN	337	>sp|P20020|AT2B1_HUMAN Plasma membrane calcium-transporting ATPase 1 OS=Homo sapiens OX=9606 GN=ATP2B1 PE=1 SV=3	1.71158e-92	1	K	AQDGAAMEMQPLK(1)SEEGGDGDEKDKK	4	-0.77426	2.85332e+07	2.37355e+07	-0.265594	12070000	193780	5.96087
sp|Q13263|TIF1B_HUMAN	366	>sp|Q13263|TIF1B_HUMAN Transcription intermediary factor 1-beta OS=Homo sapiens OX=9606 GN=TRIM28 PE=1 SV=5	0.00172712	1	K	K(1)LIYFQLHR	3	0.067686	1	1	0	15468000	257301	5.90968
sp|Q86YT6|MIB1_HUMAN	896	>sp|Q86YT6|MIB1_HUMAN E3 ubiquitin-protein ligase MIB1 OS=Homo sapiens OX=9606 GN=MIB1 PE=1 SV=1	2.76121e-15	1	K	AAVLFQPCGHMCACENCANLMK(0.195)K(0.805)	4	-1.5996	1	1	0	37270000	695172	5.7445
sp|Q07666|KHDR1_HUMAN;sp|Q5VWX1|KHDR2_HUMAN	169;73	>sp|Q07666|KHDR1_HUMAN KH domain-containing, RNA-binding, signal transduction-associated protein 1 OS=Homo sapiens OX=9606 GN=KHDRBS1 PE=1 SV=1;>sp|Q5VWX1|KHDR2_HUMAN KH domain-containing, RNA-binding, signal transduction-associated protein 2 OS=Homo sapie	0.0025583	1	K	QYPK(1)FNFVGK	3	-0.039103	4.23072e+07	2.5773e+07	-0.715042	40094000	757521	5.72596
sp|P04075|ALDOA_HUMAN;sp|P09972|ALDOC_HUMAN	200;200	>sp|P04075|ALDOA_HUMAN Fructose-bisphosphate aldolase A OS=Homo sapiens OX=9606 GN=ALDOA PE=1 SV=2;>sp|P09972|ALDOC_HUMAN Fructose-bisphosphate aldolase C OS=Homo sapiens OX=9606 GN=ALDOC PE=1 SV=2	1.04462e-44	1	K	YASICQQNGIVPIVEPEILPDGDHDLK(1)R	4	-0.93683	1.98168e+07	1.67639e+07	-0.241368	51116000	976499	5.71001
sp|P45974|UBP5_HUMAN	423	>sp|P45974|UBP5_HUMAN Ubiquitin carboxyl-terminal hydrolase 5 OS=Homo sapiens OX=9606 GN=USP5 PE=1 SV=2	2.79171e-07	1	K	ALIGK(1)GHPEFSTNR	3	-0.048788	7.79413e+06	2.06659e+08	4.72872	6978300	135024	5.69159
sp|P38919|IF4A3_HUMAN;sp|P60842|IF4A1_HUMAN;sp|Q14240|IF4A2_HUMAN	60;54;55	>sp|P38919|IF4A3_HUMAN Eukaryotic initiation factor 4A-III OS=Homo sapiens OX=9606 GN=EIF4A3 PE=1 SV=4;>sp|P60842|IF4A1_HUMAN Eukaryotic initiation factor 4A-I OS=Homo sapiens OX=9606 GN=EIF4A1 PE=1 SV=1;>sp|Q14240|IF4A2_HUMAN Eukaryotic initiation factor	2.36986e-06	1	K	GIYAYGFEK(1)PSAIQQR	3	0.31186	5.85931e+07	999288	-5.87369	18723000	375412	5.64019
sp|Q5JNZ5|RS26L_HUMAN;sp|P62854|RS26_HUMAN	82;82	>sp|Q5JNZ5|RS26L_HUMAN Putative 40S ribosomal protein S26-like 1 OS=Homo sapiens OX=9606 GN=RPS26P11 PE=5 SV=1;>sp|P62854|RS26_HUMAN 40S ribosomal protein S26 OS=Homo sapiens OX=9606 GN=RPS26 PE=1 SV=3	0.000152814	1	K	LHYCVSCAIHSK(1)VVR	4	-2.5655	1.17854e+07	3.11219e+06	-1.921	6175900	124111	5.63695
sp|Q8IWV7|UBR1_HUMAN	104	>sp|Q8IWV7|UBR1_HUMAN E3 ubiquitin-protein ligase UBR1 OS=Homo sapiens OX=9606 GN=UBR1 PE=1 SV=1	0.000502843	1	K	VFK(1)SGETTYSCR	3	-0.87968	1	1.34998e+07	23.6864	12023000	243309	5.62686
sp|P62979|RS27A_HUMAN;sp|P62987|RL40_HUMAN;sp|P0CG47|UBB_HUMAN;sp|P0CG48|UBC_HUMAN	63;63;63;63	>sp|P62979|RS27A_HUMAN Ubiquitin-40S ribosomal protein S27a OS=Homo sapiens OX=9606 GN=RPS27A PE=1 SV=2;>sp|P62987|RL40_HUMAN Ubiquitin-60S ribosomal protein L40 OS=Homo sapiens OX=9606 GN=UBA52 PE=1 SV=2;>sp|P0CG47|UBB_HUMAN Polyubiquitin-B OS=Homo sapien	0	1;2	K	TLSDYNIQK(1)ESTLHLVLRLR	4	-0.010295	1.47578e+08	1.4428e+08	-0.0326087	132830000	2.71294e+06	5.61358
sp|Q5SNT2|TM201_HUMAN	192	>sp|Q5SNT2|TM201_HUMAN Transmembrane protein 201 OS=Homo sapiens OX=9606 GN=TMEM201 PE=1 SV=1	0.00739296	1	K	ALLLSHQFK(1)R	3	1.3359	1	9.04422e+06	23.1086	18769000	383758	5.61201
sp|Q14683|SMC1A_HUMAN	918	>sp|Q14683|SMC1A_HUMAN Structural maintenance of chromosomes protein 1A OS=Homo sapiens OX=9606 GN=SMC1A PE=1 SV=2	0.00673954	1	K	EVTAIETK(0.999)LEQK(0.001)	3	-0.48041	1	5.45744e+06	22.3798	18470000	393914	5.55116
sp|Q969G3|SMCE1_HUMAN	271	>sp|Q969G3|SMCE1_HUMAN SWI/SNF-related matrix-associated actin-dependent regulator of chromatin subfamily E member 1 OS=Homo sapiens OX=9606 GN=SMARCE1 PE=1 SV=2	2.29024e-16	1	K	KFLESTDSFNNELK(1)R	3	-0.46444	5.19609e+07	4.04624e+07	-0.360845	11342000	242454	5.54782
sp|P17302|CXA1_HUMAN	136	>sp|P17302|CXA1_HUMAN Gap junction alpha-1 protein OS=Homo sapiens OX=9606 GN=GJA1 PE=1 SV=2	0.00129918	1	K	FK(1)YGIEEHGK	3	0.61074	1.58042e+07	1.40925e+07	-0.165382	24304000	522338	5.54007
sp|O76094|SRP72_HUMAN	391	>sp|O76094|SRP72_HUMAN Signal recognition particle subunit SRP72 OS=Homo sapiens OX=9606 GN=SRP72 PE=1 SV=3	0.000747594	1	K	ISQGNISK(1)ACLILR	3	1.9379	1	1	0	18747000	419809	5.48078
sp|Q9NS93|TM7S3_HUMAN	553	>sp|Q9NS93|TM7S3_HUMAN Transmembrane 7 superfamily member 3 OS=Homo sapiens OX=9606 GN=TM7SF3 PE=2 SV=1	0.00128724	1	K	LTQIK(1)GLFQK	2	0.3344	1	1	0	25299000	567554	5.47818
sp|Q7Z6Z7|HUWE1_HUMAN	2267	>sp|Q7Z6Z7|HUWE1_HUMAN E3 ubiquitin-protein ligase HUWE1 OS=Homo sapiens OX=9606 GN=HUWE1 PE=1 SV=3	0.000705545	1	K	IVNQPSSLFGSK(0.974)SASSK(0.026)	3	0.061512	2.317e+07	2.07287e+07	-0.16063	14308000	322045	5.47341
sp|Q6YHU6|THADA_HUMAN	1659	>sp|Q6YHU6|THADA_HUMAN Thyroid adenoma-associated protein OS=Homo sapiens OX=9606 GN=THADA PE=1 SV=1	1.37271e-05	1	K	LASK(1)VISHHMQTCVENR	4	0.03551	1	1	0	6791400	155065	5.45276
sp|Q495C1|RN212_HUMAN	101	>sp|Q495C1|RN212_HUMAN Probable E3 SUMO-protein ligase RNF212 OS=Homo sapiens OX=9606 GN=RNF212 PE=2 SV=1	0.0228458	1	K	LLAFYREK(1)ISR	3	3.4792	2.10291e+07	1.89598e+07	-0.149445	5706600	130746	5.44779
sp|P63000|RAC1_HUMAN	133	>sp|P63000|RAC1_HUMAN Ras-related C3 botulinum toxin substrate 1 OS=Homo sapiens OX=9606 GN=RAC1 PE=1 SV=1	6.66053e-05	1	K	K(1)LTPITYPQGLAMAK	3	-1.5116	2.18587e+07	1.35348e+07	-0.691537	10579000	243431	5.44155
sp|Q15154|PCM1_HUMAN	1197	>sp|Q15154|PCM1_HUMAN Pericentriolar material 1 protein OS=Homo sapiens OX=9606 GN=PCM1 PE=1 SV=4	2.30208e-18	1	K	NK(0.991)K(0.009)LPEEEVESSR	3	-0.05657	2.51654e+07	2.74791e+07	0.126894	11225000	267994	5.38837
sp|O94888|UBXN7_HUMAN	440	>sp|O94888|UBXN7_HUMAN UBX domain-containing protein 7 OS=Homo sapiens OX=9606 GN=UBXN7 PE=1 SV=2	0.00157501	1	K	LLALVK(1)HVQSK	3	0.57671	1	1.85955e+07	24.1485	8569500	213393	5.32762
sp|Q9H2J7|S6A15_HUMAN	692	>sp|Q9H2J7|S6A15_HUMAN Sodium-dependent neutral amino acid transporter B(0)AT2 OS=Homo sapiens OX=9606 GN=SLC6A15 PE=1 SV=1	3.06518e-06	1	K	IPSEMPSPNFGK(1)NIYR	3	-0.97289	1.55816e+06	1	-20.5714	12546000	318342	5.3005
sp|O75694|NU155_HUMAN	1197	>sp|O75694|NU155_HUMAN Nuclear pore complex protein Nup155 OS=Homo sapiens OX=9606 GN=NUP155 PE=1 SV=1	4.50335e-07	1	K	LYGEFADPFK(1)LAECK	3	0.91468	9.49783e+07	1.14592e+07	-3.05109	32557000	858523	5.24497
sp|Q96DB5|RMD1_HUMAN	230	>sp|Q96DB5|RMD1_HUMAN Regulator of microtubule dynamics protein 1 OS=Homo sapiens OX=9606 GN=RMDN1 PE=1 SV=1	0.00172063	1	K	IAK(1)MLFATPPSSTYEK	3	-0.24155	1	1	0	45776000	1.22534e+06	5.22333
sp|Q9UBE0|SAE1_HUMAN	183	>sp|Q9UBE0|SAE1_HUMAN SUMO-activating enzyme subunit 1 OS=Homo sapiens OX=9606 GN=SAE1 PE=1 SV=1	0.00266326	1	K	VAK(1)VSQGVEDGPDTKR	4	0.22569	1	1	0	5197600	142344	5.1904
sp|Q86YT6|MIB1_HUMAN	872	>sp|Q86YT6|MIB1_HUMAN E3 ubiquitin-protein ligase MIB1 OS=Homo sapiens OX=9606 GN=MIB1 PE=1 SV=1	1.15545e-17	1	K	IEECVVCSDK(0.982)K(0.018)	3	-0.78505	8.33394e+06	1.25562e+07	0.591327	31949000	875497	5.18953
sp|P33121|ACSL1_HUMAN	521	>sp|P33121|ACSL1_HUMAN Long-chain-fatty-acid--CoA ligase 1 OS=Homo sapiens OX=9606 GN=ACSL1 PE=1 SV=1	0.00151324	1	K	GPNVFQGYLK(0.965)DPAK(0.035)	3	-1.2372	6.4358e+06	6.04162e+06	-0.0911839	15814000	456470	5.11454
sp|P21333|FLNA_HUMAN	300	>sp|P21333|FLNA_HUMAN Filamin-A OS=Homo sapiens OX=9606 GN=FLNA PE=1 SV=4	2.43751e-05	1	K	AYGPGIEPTGNMVK(0.282)K(0.718)	3	-0.25376	1.2852e+07	1.26817e+07	-0.0192367	10844000	313894	5.11047
sp|P63261|ACTG_HUMAN;sp|P60709|ACTB_HUMAN	291;291	>sp|P63261|ACTG_HUMAN Actin, cytoplasmic 2 OS=Homo sapiens OX=9606 GN=ACTG1 PE=1 SV=1;>sp|P60709|ACTB_HUMAN Actin, cytoplasmic 1 OS=Homo sapiens OX=9606 GN=ACTB PE=1 SV=1	2.3631e-20	1	K	K(1)DLYANTVLSGGTTMYPGIADR	3	0.34163	1.11365e+08	6.46023e+07	-0.785634	36782000	1.07068e+06	5.1024
sp|P13489|RINI_HUMAN	89	>sp|P13489|RINI_HUMAN Ribonuclease inhibitor OS=Homo sapiens OX=9606 GN=RNH1 PE=1 SV=2	1.11606e-47	1	K	IQK(1)LSLQNCCLTGAGCGVLSSTLR	3	-1.4654	8.31124e+07	8.4656e+07	0.0265487	21537000	628754	5.09818
sp|Q13618|CUL3_HUMAN	262	>sp|Q13618|CUL3_HUMAN Cullin-3 OS=Homo sapiens OX=9606 GN=CUL3 PE=1 SV=2	0.0106155	1	K	STEEPIVK(1)VVER	2	-4.0532	5.50507e+07	1	-25.7143	3618200	106160	5.09096
sp|P17980|PRS6A_HUMAN	245	>sp|P17980|PRS6A_HUMAN 26S proteasome regulatory subunit 6A OS=Homo sapiens OX=9606 GN=PSMC3 PE=1 SV=3	0.000222244	1	K	ACAAQTK(1)ATFLK	3	-0.27113	7.13498e+06	7.09586e+06	-0.00793148	5238800	158695	5.04491
sp|O00299|CLIC1_HUMAN	49	>sp|O00299|CLIC1_HUMAN Chloride intracellular channel protein 1 OS=Homo sapiens OX=9606 GN=CLIC1 PE=1 SV=4	0.000438757	1	K	GVTFNVTTVDTK(1)R	3	-0.88949	3.02943e+07	258574	-6.87232	23241000	729304	4.99401
sp|P25686|DNJB2_HUMAN	59	>sp|P25686|DNJB2_HUMAN DnaJ homolog subfamily B member 2 OS=Homo sapiens OX=9606 GN=DNAJB2 PE=1 SV=3	2.53245e-16	1	K	EVAEAYEVLSDK(0.976)HK(0.024)R	4	0.72505	7.47088e+07	1.39804e+08	0.90405	74845000	2.35024e+06	4.99303
sp|P61088|UBE2N_HUMAN	92	>sp|P61088|UBE2N_HUMAN Ubiquitin-conjugating enzyme E2 N OS=Homo sapiens OX=9606 GN=UBE2N PE=1 SV=1	1.3991e-115	1	K	ICLDILK(0.978)DK(0.022)	2	-0.39808	7.35329e+08	3.54397e+08	-1.05302	195330000	6.1602e+06	4.98679
sp|Q12768|WASC5_HUMAN	974	>sp|Q12768|WASC5_HUMAN WASH complex subunit 5 OS=Homo sapiens OX=9606 GN=WASHC5 PE=1 SV=1	3.26973e-05	1	K	FDSK(1)HLAAALENLNK	3	-0.69307	1	1	0	49689000	1.58414e+06	4.97116
sp|P61019|RAB2A_HUMAN	165	>sp|P61019|RAB2A_HUMAN Ras-related protein Rab-2A OS=Homo sapiens OX=9606 GN=RAB2A PE=1 SV=1	1.08931e-09	1	K	TASNVEEAFINTAK(0.996)EIYEK(0.004)	3	0.87313	1.83978e+06	2.15437e+06	0.227735	6813400	217634	4.9684
sp|P60228|EIF3E_HUMAN	409	>sp|P60228|EIF3E_HUMAN Eukaryotic translation initiation factor 3 subunit E OS=Homo sapiens OX=9606 GN=EIF3E PE=1 SV=1	0.000168026	1	K	LGHVVMGNNAVSPYQQVIEK(0.42)TK(0.58)	4	1.7584	1	6.52876e+06	22.6384	16068000	514114	4.96596
sp|P07948|LYN_HUMAN	9	>sp|P07948|LYN_HUMAN Tyrosine-protein kinase Lyn OS=Homo sapiens OX=9606 GN=LYN PE=1 SV=3	0.0359798		K	GK(1)DSLSDDGVDLK	3	-3.8171	1	1.33074e+07	23.6657	4505500	147782	4.93015
sp|Q01082|SPTB2_HUMAN	2177	>sp|Q01082|SPTB2_HUMAN Spectrin beta chain, non-erythrocytic 1 OS=Homo sapiens OX=9606 GN=SPTBN1 PE=1 SV=2	0.00162108	1	K	AK(1)TALPAQSAATLPAR	3	0.53346	7.25505e+06	1	-22.7906	4273400	143627	4.89499
sp|P60174|TPIS_HUMAN	106	>sp|P60174|TPIS_HUMAN Triosephosphate isomerase OS=Homo sapiens OX=9606 GN=TPI1 PE=1 SV=3	7.82394e-08	1	K	IAVAAQNCYK(1)VTNGAFTGEISPGMIK	3	0.44902	1	1.20653e+07	23.5244	14667000	505083	4.85991
sp|Q9C004|SPY4_HUMAN	284	>sp|Q9C004|SPY4_HUMAN Protein sprouty homolog 4 OS=Homo sapiens OX=9606 GN=SPRY4 PE=1 SV=2	0.000247806	1	K	HTNSVICK(1)AASGDAK	3	-0.406	1	1	0	4104200	144348	4.82948
sp|P51532|SMCA4_HUMAN	1027	>sp|P51532|SMCA4_HUMAN Transcription activator BRG1 OS=Homo sapiens OX=9606 GN=SMARCA4 PE=1 SV=2	0.0269445		K	GVLLTDGSEK(0.155)DK(0.129)K(0.716)	2	-0.94964	4.57827e+07	4.94941e+07	0.112456	69672000	2.46951e+06	4.81828
sp|Q8NE01|CNNM3_HUMAN	475	>sp|Q8NE01|CNNM3_HUMAN Metal transporter CNNM3 OS=Homo sapiens OX=9606 GN=CNNM3 PE=1 SV=1	0.0364576	1	K	K(1)EEFSLFK	2	0.53565	2.14687e+06	4.85742e+06	1.17796	11879000	424257	4.80733
sp|Q99816|TS101_HUMAN	237	>sp|Q99816|TS101_HUMAN Tumor susceptibility gene 101 protein OS=Homo sapiens OX=9606 GN=TSG101 PE=1 SV=2	0.000283917	1	K	ASLISAVSDK(1)LR	3	-0.73608	1	1.67248e+06	20.6736	9147200	335084	4.77073
sp|O95819|M4K4_HUMAN	851	>sp|O95819|M4K4_HUMAN Mitogen-activated protein kinase kinase kinase kinase 4 OS=Homo sapiens OX=9606 GN=MAP4K4 PE=1 SV=2	0.00157654	1	K	HK(1)SSSSFTPFIDPR	3	-1.3241	1	1	0	11650000	439630	4.7279
sp|Q8TC12|RDH11_HUMAN	194	>sp|Q8TC12|RDH11_HUMAN Retinol dehydrogenase 11 OS=Homo sapiens OX=9606 GN=RDH11 PE=1 SV=2	8.39737e-05	1	K	IHFHNLQGEK(1)FYNAGLAYCHSK	4	-0.82759	1	1	0	13913000	528461	4.71849
sp|Q6NUK4|REEP3_HUMAN	99	>sp|Q6NUK4|REEP3_HUMAN Receptor expression-enhancing protein 3 OS=Homo sapiens OX=9606 GN=REEP3 PE=1 SV=1	0.0061304	1	K	FLHPLLSSK(1)ER	3	-0.00029601	1.29578e+07	1.2548e+07	-0.0463647	3050400	116104	4.71551
sp|P62140|PP1B_HUMAN	303	>sp|P62140|PP1B_HUMAN Serine/threonine-protein phosphatase PP1-beta catalytic subunit OS=Homo sapiens OX=9606 GN=PPP1CB PE=1 SV=3	0.000328616	1	K	AK(1)YQYGGLNSGRPVTPPR	4	0.46717	1	1.85431e+06	20.8224	7084300	271245	4.70696
sp|P68363|TBA1B_HUMAN;sp|P68366|TBA4A_HUMAN;sp|Q71U36|TBA1A_HUMAN;sp|Q9BQE3|TBA1C_HUMAN	311;311;311;311	>sp|P68363|TBA1B_HUMAN Tubulin alpha-1B chain OS=Homo sapiens OX=9606 GN=TUBA1B PE=1 SV=1;>sp|P68366|TBA4A_HUMAN Tubulin alpha-4A chain OS=Homo sapiens OX=9606 GN=TUBA4A PE=1 SV=1;>sp|Q71U36|TBA1A_HUMAN Tubulin alpha-1A chain OS=Homo sapiens OX=9606 GN=TUB	8.88001e-13	1	K	HGK(1)YMACCLLYR	3	-2.7145	8.48108e+07	1.77847e+08	1.06831	20130000	774910	4.69917
sp|P16070|CD44_HUMAN	705	>sp|P16070|CD44_HUMAN CD44 antigen OS=Homo sapiens OX=9606 GN=CD44 PE=1 SV=3	9.85678e-73	1	K	KPSGLNGEASK(1)SQEMVHLVNK	4	0.038287	1	1.37581e+06	20.3918	137990000	5.36697e+06	4.68431
sp|P68036|UB2L3_HUMAN	82	>sp|P68036|UB2L3_HUMAN Ubiquitin-conjugating enzyme E2 L3 OS=Homo sapiens OX=9606 GN=UBE2L3 PE=1 SV=1	3.57485e-08	1	K	IYHPNIDEK(1)GQVCLPVISAENWKPATK	5	0.8603	2.55715e+07	1	-24.608	19746000	768983	4.68246
sp|P46379|BAG6_HUMAN	40	>sp|P46379|BAG6_HUMAN Large proline-rich protein BAG6 OS=Homo sapiens OX=9606 GN=BAG6 PE=1 SV=2	0.00359106	1	K	TFIVGAQMNVK(0.747)EFK(0.253)	3	-1.3932	1	1	0	7649600	308627	4.63145
sp|Q9UM54|MYO6_HUMAN	1076	>sp|Q9UM54|MYO6_HUMAN Unconventional myosin-VI OS=Homo sapiens OX=9606 GN=MYO6 PE=1 SV=4	0.00116867	1	K	GPAVLATK(0.999)AAAGTK(0.001)	2	0.89609	1	123216	16.9108	12830000	523328	4.61566
sp|P11142|HSP7C_HUMAN;sp|P54652|HSP72_HUMAN	348;351	>sp|P11142|HSP7C_HUMAN Heat shock cognate 71 kDa protein OS=Homo sapiens OX=9606 GN=HSPA8 PE=1 SV=1;>sp|P54652|HSP72_HUMAN Heat shock-related 70 kDa protein 2 OS=Homo sapiens OX=9606 GN=HSPA2 PE=1 SV=1	1.69974e-13	1	K	IQK(1)LLQDFFNGK	3	0.11406	1.0515e+08	1.07039e+08	0.0256911	134290000	5.63924e+06	4.57371
sp|P61020|RAB5B_HUMAN	134	>sp|P61020|RAB5B_HUMAN Ras-related protein Rab-5B OS=Homo sapiens OX=9606 GN=RAB5B PE=1 SV=1	0.00073116		K	QASPSIVIALAGNK(0.937)ADLANK(0.063)R	4	1.4535	1	1.457e+07	23.7965	12871000	540754	4.57301
sp|Q86YT6|MIB1_HUMAN	938	>sp|Q86YT6|MIB1_HUMAN E3 ubiquitin-protein ligase MIB1 OS=Homo sapiens OX=9606 GN=MIB1 PE=1 SV=1	0.00113038	1	K	DK(1)DNTNVNADVQK	3	-0.039201	4.68582e+06	2.53562e+06	-0.885961	4372000	194158	4.49299
sp|P62277|RS13_HUMAN	27	>sp|P62277|RS13_HUMAN 40S ribosomal protein S13 OS=Homo sapiens OX=9606 GN=RPS13 PE=1 SV=2	0.00271385	1	K	SVPTWLK(0.996)LTSDDVK(0.004)	3	0.91446	1	1	0	14090000	630782	4.48139
sp|P54725|RD23A_HUMAN	80	>sp|P54725|RD23A_HUMAN UV excision repair protein RAD23 homolog A OS=Homo sapiens OX=9606 GN=RAD23A PE=1 SV=1	3.25811e-61	1	K	TK(1)AGQGTSAPPEASPTAAPESSTSFPPAPTSGMSHPPPAAR	4	-1.8294	2.09069e+06	1.521e+07	2.86297	22941000	1.03588e+06	4.469
sp|Q9Y2I1|NISCH_HUMAN	1303	>sp|Q9Y2I1|NISCH_HUMAN Nischarin OS=Homo sapiens OX=9606 GN=NISCH PE=1 SV=3	0.000236552	1	K	TTGK(1)MENYELIHSSR	4	-0.41973	4.21209e+07	3.49643e+07	-0.268654	37980000	1.71697e+06	4.4673
sp|P60900|PSA6_HUMAN	45	>sp|P60900|PSA6_HUMAN Proteasome subunit alpha type-6 OS=Homo sapiens OX=9606 GN=PSMA6 PE=1 SV=1	0.0010224	1	K	GK(1)DCAVIVTQK	2	-0.36	1.09851e+07	1.3826e+07	0.331835	9537800	438983	4.44142
sp|P63010|AP2B1_HUMAN;sp|Q10567|AP1B1_HUMAN	131;131	>sp|P63010|AP2B1_HUMAN AP-2 complex subunit beta OS=Homo sapiens OX=9606 GN=AP2B1 PE=1 SV=1;>sp|Q10567|AP1B1_HUMAN AP-1 complex subunit beta-1 OS=Homo sapiens OX=9606 GN=AP1B1 PE=1 SV=2	0.00590636	1	K	CLK(1)DEDPYVR	2	1.3245	1.69831e+08	1.16681e+08	-0.541528	8070600	378760	4.41332
sp|O75533|SF3B1_HUMAN	793	>sp|O75533|SF3B1_HUMAN Splicing factor 3B subunit 1 OS=Homo sapiens OX=9606 GN=SF3B1 PE=1 SV=3	1.12979e-05	1	K	VVK(1)QCCGTDGVEANYIK	3	-1.5529	1.50533e+07	1.03489e+07	-0.540595	20020000	942355	4.40903
sp|Q92890|UFD1_HUMAN	264	>sp|Q92890|UFD1_HUMAN Ubiquitin recognition factor in ER-associated degradation protein 1 OS=Homo sapiens OX=9606 GN=UFD1 PE=1 SV=3	0.00114823	1	K	GIPNYEFK(0.993)LGK(0.007)	3	-1.1021	6.37788e+07	5.84662e+07	-0.125473	25610000	1.22191e+06	4.3895
sp|P06748|NPM_HUMAN	141	>sp|P06748|NPM_HUMAN Nucleophosmin OS=Homo sapiens OX=9606 GN=NPM1 PE=1 SV=2	0.011816	1	K	LLSISGK(1)R	2	-0.5337	1.31898e+07	6.93914e+06	-0.926589	2700800	129598	4.38127
sp|Q9Y5J1|UTP18_HUMAN	329	>sp|Q9Y5J1|UTP18_HUMAN U3 small nucleolar RNA-associated protein 18 homolog OS=Homo sapiens OX=9606 GN=UTP18 PE=1 SV=3	3.18391e-05	1	K	VLYVYDMLAGK(1)LIPVHQVR	4	1.5212	1	1.67556e+06	20.6762	10182000	493510	4.3668
sp|P35579|MYH9_HUMAN;sp|P35580|MYH10_HUMAN	682;689	>sp|P35579|MYH9_HUMAN Myosin-9 OS=Homo sapiens OX=9606 GN=MYH9 PE=1 SV=4;>sp|P35580|MYH10_HUMAN Myosin-10 OS=Homo sapiens OX=9606 GN=MYH10 PE=1 SV=3	0.000115101	1	K	AGK(1)LDPHLVLDQLR	3	0.15671	1.00437e+08	1.03263e+08	0.040023	14238000	692337	4.36213
sp|P32119|PRDX2_HUMAN	135	>sp|P32119|PRDX2_HUMAN Peroxiredoxin-2 OS=Homo sapiens OX=9606 GN=PRDX2 PE=1 SV=5	0.00180868	1	K	GLFIIDGK(1)GVLR	3	-0.52544	1	1.03036e+07	23.2967	9430100	458706	4.36163
sp|Q8IY22|CMIP_HUMAN	74	>sp|Q8IY22|CMIP_HUMAN C-Maf-inducing protein OS=Homo sapiens OX=9606 GN=CMIP PE=1 SV=3	0.0247952	1	K	TFLSK(1)ILTSK	2	1.5661	1.86903e+07	1.14726e+07	-0.704096	11307000	556653	4.34429
sp|P61313|RL15_HUMAN	157	>sp|P61313|RL15_HUMAN 60S ribosomal protein L15 OS=Homo sapiens OX=9606 GN=RPL15 PE=1 SV=2	0.000481858	1	K	NPDTQWITK(0.009)PVHK(0.991)HR	3	0.88833	1	473867	18.8541	13469000	678564	4.31101
sp|P18621|RL17_HUMAN	55	>sp|P18621|RL17_HUMAN 60S ribosomal protein L17 OS=Homo sapiens OX=9606 GN=RPL17 PE=1 SV=3	0.00740174	1	K	DVTLQK(1)QCVPFR	3	-3.3411	1	1	0	17844000	907624	4.2972
sp|O75955|FLOT1_HUMAN	54	>sp|O75955|FLOT1_HUMAN Flotillin-1 OS=Homo sapiens OX=9606 GN=FLOT1 PE=1 SV=3	1.4402e-19	1	K	ISLNTLTLNVK(0.223)SEK(0.777)	3	-0.022186	1.07074e+07	327529	-5.03084	305410000	1.55627e+07	4.29458
sp|P53621|COPA_HUMAN	825	>sp|P53621|COPA_HUMAN Coatomer subunit alpha OS=Homo sapiens OX=9606 GN=COPA PE=1 SV=2	0.00116556	1	K	GFFEGTIASK(0.955)GK(0.045)	2	0.71838	4.83791e+07	3.45979e+07	-0.483699	17027000	894952	4.24987
sp|P22626|ROA2_HUMAN	59	>sp|P22626|ROA2_HUMAN Heterogeneous nuclear ribonucleoproteins A2/B1 OS=Homo sapiens OX=9606 GN=HNRNPA2B1 PE=1 SV=2	0.00220039	1	K	LTDCVVMRDPASK(1)R	4	-1.094	1.12734e+07	1	-23.4264	31792000	1.69791e+06	4.22683
sp|Q93009|UBP7_HUMAN	443	>sp|Q93009|UBP7_HUMAN Ubiquitin carboxyl-terminal hydrolase 7 OS=Homo sapiens OX=9606 GN=USP7 PE=1 SV=2	1.7313e-08	1	K	TDPK(1)DPANYILHAVLVHSGDNHGGHYVVYLNPK	5	0.10538	1	1	0	6547100	349749	4.22646
sp|P21860|ERBB3_HUMAN	695	>sp|P21860|ERBB3_HUMAN Receptor tyrosine-protein kinase erbB-3 OS=Homo sapiens OX=9606 GN=ERBB3 PE=1 SV=1	0.000642317	1	K	GESIEPLDPSEK(0.764)ANK(0.236)	3	2.7575	1	2.82972e+06	21.4322	37415000	2.03959e+06	4.19726
sp|Q9NVA2|SEP11_HUMAN	385	>sp|Q9NVA2|SEP11_HUMAN Septin-11 OS=Homo sapiens OX=9606 GN=SEPT11 PE=1 SV=3	0.0118028	1	K	K(0.5)K(0.5)ELEEEVNNFQK	3	-0.18963	9.66665e+06	1.0274e+07	0.0879105	11724000	643284	4.18787
sp|Q9NVA2|SEP11_HUMAN	386	>sp|Q9NVA2|SEP11_HUMAN Septin-11 OS=Homo sapiens OX=9606 GN=SEPT11 PE=1 SV=3	0.0118028	1	K	K(0.5)K(0.5)ELEEEVNNFQK	3	-0.18963	9.66665e+06	1.0274e+07	0.0879105	11724000	643284	4.18787
sp|P11142|HSP7C_HUMAN	246	>sp|P11142|HSP7C_HUMAN Heat shock cognate 71 kDa protein OS=Homo sapiens OX=9606 GN=HSPA8 PE=1 SV=1	2.38054e-06	1	K	MVNHFIAEFK(1)R	3	-1.0095	6.06948e+07	6.1651e+07	0.0225535	90571000	5.05205e+06	4.16411
sp|O15212|PFD6_HUMAN	15	>sp|O15212|PFD6_HUMAN Prefoldin subunit 6 OS=Homo sapiens OX=9606 GN=PFDN6 PE=1 SV=1	0.00866924	1	K	LQGEVEK(1)YQQLQK	3	1.9863	5.45573e+06	1	-22.3793	4038300	231528	4.12449
sp|Q92974|ARHG2_HUMAN	148	>sp|Q92974|ARHG2_HUMAN Rho guanine nucleotide exchange factor 2 OS=Homo sapiens OX=9606 GN=ARHGEF2 PE=1 SV=4	2.1812e-18	1	K	SSLSLAK(1)SVSTTNIAGHFNDESPLGLR	4	1.4406	9.78105e+06	6.81576e+06	-0.521115	15382000	887681	4.11506
sp|Q14152|EIF3A_HUMAN	285	>sp|Q14152|EIF3A_HUMAN Eukaryotic translation initiation factor 3 subunit A OS=Homo sapiens OX=9606 GN=EIF3A PE=1 SV=1	1.49971e-09	1	K	VSTVFWK(1)SGNALFHASTLHR	5	0.24932	2.64927e+07	2.9424e+07	0.151396	20275000	1.17552e+06	4.10833
sp|P60228|EIF3E_HUMAN	35	>sp|P60228|EIF3E_HUMAN Eukaryotic translation initiation factor 3 subunit E OS=Homo sapiens OX=9606 GN=EIF3E PE=1 SV=1	0.00996616	1	K	EIYNEK(1)ELLQGK	3	0.68061	3.83266e+07	3.00682e+07	-0.350111	14678000	856677	4.09876
sp|P29401|TKT_HUMAN	319	>sp|P29401|TKT_HUMAN Transketolase OS=Homo sapiens OX=9606 GN=TKT PE=1 SV=3	0.013188	1	K	K(1)AYGQALAK	2	0.45436	1	1	0	3261700	193156	4.07778
sp|O60216|RAD21_HUMAN	573	>sp|O60216|RAD21_HUMAN Double-strand-break repair protein rad21 homolog OS=Homo sapiens OX=9606 GN=RAD21 PE=1 SV=2	0.00233134	1	K	ALAK(1)TGAESISLLELCR	3	0.76738	1	1	0	11181000	664596	4.07243
sp|A8MVW0|F1712_HUMAN	648	>sp|A8MVW0|F1712_HUMAN Protein FAM171A2 OS=Homo sapiens OX=9606 GN=FAM171A2 PE=1 SV=1	0.00191425	1	K	LLELGVK(1)PHPR	3	-0.87383	1.49819e+07	8.19054e+06	-0.871194	2617600	156642	4.06271
sp|Q13765|NACA_HUMAN;sp|E9PAV3|NACAM_HUMAN;sp|Q9BZK3|NACP1_HUMAN	100;1963;99	>sp|Q13765|NACA_HUMAN Nascent polypeptide-associated complex subunit alpha OS=Homo sapiens OX=9606 GN=NACA PE=1 SV=1;>sp|E9PAV3|NACAM_HUMAN Nascent polypeptide-associated complex subunit alpha, muscle-specific form OS=Homo sapiens OX=9606 GN=NACA PE=1 SV=1	0.000102705	1	K	SK(1)NILFVITKPDVYK	3	-0.49004	1.45599e+07	1.74955e+07	0.264987	26749000	1.60589e+06	4.05804
sp|O95071|UBR5_HUMAN	720	>sp|O95071|UBR5_HUMAN E3 ubiquitin-protein ligase UBR5 OS=Homo sapiens OX=9606 GN=UBR5 PE=1 SV=2	0.000184228	1	K	IDELQVVK(1)TGGTPK	3	0.17567	1	1.62555e+07	23.9544	3104400	187107	4.05238
sp|Q15758|AAAT_HUMAN	502	>sp|Q15758|AAAT_HUMAN Neutral amino acid transporter B(0) OS=Homo sapiens OX=9606 GN=SLC1A5 PE=1 SV=2	9.73543e-23	1;2	K	STEPELIQVK(1)SELPLDPLPVPTEEGNPLLK(1)HYR	5	0.99031	4.62542e+07	1.16692e+07	-1.98688	14546000	878100	4.05009
sp|P24468|COT2_HUMAN;sp|P10589|COT1_HUMAN;sp|P10588|NR2F6_HUMAN	389;396;379	>sp|P24468|COT2_HUMAN COUP transcription factor 2 OS=Homo sapiens OX=9606 GN=NR2F2 PE=1 SV=1;>sp|P10589|COT1_HUMAN COUP transcription factor 1 OS=Homo sapiens OX=9606 GN=NR2F1 PE=1 SV=1;>sp|P10588|NR2F6_HUMAN Nuclear receptor subfamily 2 group F member 6 O	0.0032408	1	K	LVGK(1)TPIETLIR	3	-0.044527	1	2.04426e+07	24.2851	2497800	150788	4.05006
sp|Q8N0X7|SPART_HUMAN	481	>sp|Q8N0X7|SPART_HUMAN Spartin OS=Homo sapiens OX=9606 GN=SPART PE=1 SV=1	0.0026048	1	K	GLYIAK(1)QATGGAAK	3	-2.0126	2.89786e+06	3.15263e+06	0.121569	2209200	134718	4.03551
sp|P27348|1433T_HUMAN	49	>sp|P27348|1433T_HUMAN 14-3-3 protein theta OS=Homo sapiens OX=9606 GN=YWHAQ PE=1 SV=1	1.79491e-09	1	K	NLLSVAYK(1)NVVGGR	3	0.16615	1	1	0	65253000	4.01148e+06	4.02384
sp|Q9HB71|CYBP_HUMAN	146	>sp|Q9HB71|CYBP_HUMAN Calcyclin-binding protein OS=Homo sapiens OX=9606 GN=CACYBP PE=1 SV=2	0.000617841	1	K	VK(1)TDTVLILCR	3	0.24979	1.13033e+07	5.6224e+07	2.31445	41631000	2.6065e+06	3.99747
sp|Q01831|XPC_HUMAN	161	>sp|Q01831|XPC_HUMAN DNA repair protein complementing XP-C cells OS=Homo sapiens OX=9606 GN=XPC PE=1 SV=4	3.67846e-10	1	K	SLLPVK(1)PVEIEIETPEQAK	3	-0.3806	3.62105e+06	4.61271e+06	0.349209	14401000	910081	3.98403
sp|Q9P265|DIP2B_HUMAN	714	>sp|Q9P265|DIP2B_HUMAN Disco-interacting protein 2 homolog B OS=Homo sapiens OX=9606 GN=DIP2B PE=1 SV=3	6.75482e-10	1	K	VNTEDK(1)NSALTVQDVGHVMPGGMMCIVKPDGPPQLCK	5	0.35482	1	1	0	11173000	709629	3.97681
sp|Q9Y4C2|TCAF1_HUMAN	817	>sp|Q9Y4C2|TCAF1_HUMAN TRPM8 channel-associated factor 1 OS=Homo sapiens OX=9606 GN=TCAF1 PE=1 SV=3	0.0248354	1	K	IYLSK(0.995)GPNVK(0.005)	2	0.10242	9.77712e+06	6.37698e+06	-0.616536	4594800	295429	3.95912
sp|O15427|MOT4_HUMAN	448	>sp|O15427|MOT4_HUMAN Monocarboxylate transporter 4 OS=Homo sapiens OX=9606 GN=SLC16A3 PE=1 SV=1	3.76419e-229	1	K	EVEHFLK(1)AEPEKNGEVVHTPETSV	3	-0.19319	3.16376e+07	4.34651e+07	0.458216	19490000	1.25455e+06	3.95749
sp|Q4J6C6|PPCEL_HUMAN	426	>sp|Q4J6C6|PPCEL_HUMAN Prolyl endopeptidase-like OS=Homo sapiens OX=9606 GN=PREPL PE=1 SV=1	2.93366e-05	1	K	FAEGK(1)LFEETGHEDPITK	3	0.91597	1	6.25031e+06	22.5755	21163000	1.39337e+06	3.92489
sp|P55011|S12A2_HUMAN	971	>sp|P55011|S12A2_HUMAN Solute carrier family 12 member 2 OS=Homo sapiens OX=9606 GN=SLC12A2 PE=1 SV=1	5.12872e-115	1	K	KSDLDTSKPLSEK(1)PITHKVEEEDGK	4	-0.014548	1.65611e+07	1.18595e+07	-0.481747	2426900	163118	3.89512
sp|P31689|DNJA1_HUMAN	32	>sp|P31689|DNJA1_HUMAN DnaJ homolog subfamily A member 1 OS=Homo sapiens OX=9606 GN=DNAJA1 PE=1 SV=2	6.16882e-05	1	K	LALK(1)YHPDKNPNEGEK	3	-0.96107	1	5.59235e+06	22.415	1710000	116255	3.87863
sp|Q9Y678|COPG1_HUMAN	572	>sp|Q9Y678|COPG1_HUMAN Coatomer subunit gamma-1 OS=Homo sapiens OX=9606 GN=COPG1 PE=1 SV=1	1.81523e-05	1	K	ALQQYTLEPSEK(0.99)PFDLK(0.01)	3	-0.1354	2.60721e+07	2.46246e+07	-0.0824074	19761000	1.34523e+06	3.87674
sp|P45974|UBP5_HUMAN	163	>sp|P45974|UBP5_HUMAN Ubiquitin carboxyl-terminal hydrolase 5 OS=Homo sapiens OX=9606 GN=USP5 PE=1 SV=2	0.000191733	1	K	K(1)QEVQAWDGEVR	3	-0.30107	1.26328e+07	1.50114e+07	0.248891	1146300	81038.6	3.82223
sp|Q12866|MERTK_HUMAN	552	>sp|Q12866|MERTK_HUMAN Tyrosine-protein kinase Mer OS=Homo sapiens OX=9606 GN=MERTK PE=1 SV=2	4.28939e-05	1	K	FGNAFTEEDSELVVNYIAK(0.5)K(0.5)	3	-0.098291	1	1	0	24880000	1.77514e+06	3.80898
sp|Q12866|MERTK_HUMAN	553	>sp|Q12866|MERTK_HUMAN Tyrosine-protein kinase Mer OS=Homo sapiens OX=9606 GN=MERTK PE=1 SV=2	4.28939e-05	1	K	FGNAFTEEDSELVVNYIAK(0.5)K(0.5)	3	-0.098291	1	1	0	24880000	1.77514e+06	3.80898
sp|Q9UPU5|UBP24_HUMAN	648	>sp|Q9UPU5|UBP24_HUMAN Ubiquitin carboxyl-terminal hydrolase 24 OS=Homo sapiens OX=9606 GN=USP24 PE=1 SV=3	0.0276474	1	K	SFIK(1)QTYQK	2	-0.99639	6.8062e+06	7.38316e+06	0.117389	2055800	147550	3.80043
sp|Q12959|DLG1_HUMAN;sp|Q92796|DLG3_HUMAN;sp|Q15700|DLG2_HUMAN	816;729;782	>sp|Q12959|DLG1_HUMAN Disks large homolog 1 OS=Homo sapiens OX=9606 GN=DLG1 PE=1 SV=2;>sp|Q92796|DLG3_HUMAN Disks large homolog 3 OS=Homo sapiens OX=9606 GN=DLG3 PE=1 SV=2;>sp|Q15700|DLG2_HUMAN Disks large homolog 2 OS=Homo sapiens OX=9606 GN=DLG2 PE=1 SV=	0.000928404	1	K	HCILDVSGNAIK(1)R	3	0.88514	7.00064e+06	5.24022e+06	-0.417861	2301000	166442	3.78917
sp|P0DMV9|HS71B_HUMAN;sp|P0DMV8|HS71A_HUMAN	597;597	>sp|P0DMV9|HS71B_HUMAN Heat shock 70 kDa protein 1B OS=Homo sapiens OX=9606 GN=HSPA1B PE=1 SV=1;>sp|P0DMV8|HS71A_HUMAN Heat shock 70 kDa protein 1A OS=Homo sapiens OX=9606 GN=HSPA1A PE=1 SV=1	1.2016e-126	1	K	RK(1)ELEQVCNPIISGLYQGAGGPGPGGFGAQGPK	4	-0.073496	1.32474e+08	1.50763e+08	0.186572	20594000	1.50751e+06	3.77198
sp|Q13547|HDAC1_HUMAN	74	>sp|Q13547|HDAC1_HUMAN Histone deacetylase 1 OS=Homo sapiens OX=9606 GN=HDAC1 PE=1 SV=1	0.0180008	1	K	YHSDDYIK(1)FLR	3	0.041835	1.77152e+07	1	-24.0785	1881900	139777	3.75099
sp|Q01469|FABP5_HUMAN	34	>sp|Q01469|FABP5_HUMAN Fatty acid-binding protein, epidermal OS=Homo sapiens OX=9606 GN=FABP5 PE=1 SV=3	0.00140609	1	K	K(0.997)MGAMAK(0.003)PDCIITCDGK	3	-0.87189	1	1	0	14169000	1.05822e+06	3.74303
sp|P12268|IMDH2_HUMAN	450	>sp|P12268|IMDH2_HUMAN Inosine-5'-monophosphate dehydrogenase 2 OS=Homo sapiens OX=9606 GN=IMPDH2 PE=1 SV=2	3.69661e-12	1	K	VAQGVSGAVQDK(1)GSIHK	4	0.33222	1	2.71642e+06	21.3733	190570000	1.43883e+07	3.72735
sp|O75955|FLOT1_HUMAN	422	>sp|O75955|FLOT1_HUMAN Flotillin-1 OS=Homo sapiens OX=9606 GN=FLOT1 PE=1 SV=3	0.00271484	1	K	LTGVSISQVNHK(1)PLR	3	0.27876	1	1	0	3189400	242661	3.71627
sp|P38159|RBMX_HUMAN	22	>sp|P38159|RBMX_HUMAN RNA-binding motif protein, X chromosome OS=Homo sapiens OX=9606 GN=RBMX PE=1 SV=3	3.12865e-64	1	K	LFIGGLNTETNEK(1)ALEAVFGK	3	-0.77348	1.21544e+08	1	-26.8569	8084300	622558	3.69884
sp|Q9Y6M1|IF2B2_HUMAN	270	>sp|Q9Y6M1|IF2B2_HUMAN Insulin-like growth factor 2 mRNA-binding protein 2 OS=Homo sapiens OX=9606 GN=IGF2BP2 PE=1 SV=2	2.40499e-09	1	K	EADETK(1)LAEEIPLK	2	2.4774	7.45822e+07	6.21944e+07	-0.262048	23667000	1.83087e+06	3.69228
sp|Q9Y5T5|UBP16_HUMAN	293	>sp|Q9Y5T5|UBP16_HUMAN Ubiquitin carboxyl-terminal hydrolase 16 OS=Homo sapiens OX=9606 GN=USP16 PE=1 SV=1	0.000814841	1	K	FK(1)GYQQQDSQELLR	3	2.5344	1	1	0	17875000	1.39484e+06	3.67977
sp|P04637|P53_HUMAN	120	>sp|P04637|P53_HUMAN Cellular tumor antigen p53 OS=Homo sapiens OX=9606 GN=TP53 PE=1 SV=4	2.20846e-05	1	K	LGFLHSGTAK(1)SVTCTYSPALNK	3	0.26364	1	1	0	10329000	835719	3.62754
sp|Q9ULK5|VANG2_HUMAN	452	>sp|Q9ULK5|VANG2_HUMAN Vang-like protein 2 OS=Homo sapiens OX=9606 GN=VANGL2 PE=1 SV=2	0.00116867	1	K	YLAAGPTIQYHK(1)ER	3	0.74376	1	1	0	2499900	212416	3.55691
sp|Q92900|RENT1_HUMAN	439	>sp|Q92900|RENT1_HUMAN Regulator of nonsense transcripts 1 OS=Homo sapiens OX=9606 GN=UPF1 PE=1 SV=2	1.32235e-13	1	K	MQSALK(1)TFAVDETSVSGYIYHK	3	1.9941	1	1	0	5597200	515275	3.44129
sp|Q6UW68|TM205_HUMAN	122	>sp|Q6UW68|TM205_HUMAN Transmembrane protein 205 OS=Homo sapiens OX=9606 GN=TMEM205 PE=1 SV=1	0.00426408	1	K	TTAAMWALQTVEK(1)ER	3	0.23927	1	853495	19.703	4975300	462006	3.4288
sp|P09493|TPM1_HUMAN	233	>sp|P09493|TPM1_HUMAN Tropomyosin alpha-1 chain OS=Homo sapiens OX=9606 GN=TPM1 PE=1 SV=2	0.038695		K	VLSDK(0.045)LK(0.955)EAETR	3	0.17484	1	1.00191e+07	23.2563	404160	37734.3	3.42098
sp|Q9Y3B8|ORN_HUMAN	173	>sp|Q9Y3B8|ORN_HUMAN Oligoribonuclease, mitochondrial OS=Homo sapiens OX=9606 GN=REXO2 PE=1 SV=3	0.00138136	1	K	IIDVSTVK(1)ELCR	3	1.2798	2.02476e+07	1.2372e+07	-0.710673	2933400	274899	3.4156
sp|Q13200|PSMD2_HUMAN	66	>sp|Q13200|PSMD2_HUMAN 26S proteasome non-ATPase regulatory subunit 2 OS=Homo sapiens OX=9606 GN=PSMD2 PE=1 SV=3	1.58156e-06	1	K	LGEK(1)DTSLYRPALEELRR	5	0.5836	1.84051e+06	1	-20.8117	13179000	1.25834e+06	3.38865
sp|P26038|MOES_HUMAN	209	>sp|P26038|MOES_HUMAN Moesin OS=Homo sapiens OX=9606 GN=MSN PE=1 SV=3	5.9322e-47	1	K	IAQDLEMYGVNYFSIK(0.533)NK(0.467)	3	1.4103	1	320254	18.2889	22721000	2.1976e+06	3.37002
sp|P26038|MOES_HUMAN	211	>sp|P26038|MOES_HUMAN Moesin OS=Homo sapiens OX=9606 GN=MSN PE=1 SV=3	5.9322e-47	1	K	IAQDLEMYGVNYFSIK(0.168)NK(0.832)	3	1.222	1	320254	18.2889	22721000	2.1976e+06	3.37002
sp|Q9BU02|THTPA_HUMAN	193	>sp|Q9BU02|THTPA_HUMAN Thiamine-triphosphatase OS=Homo sapiens OX=9606 GN=THTPA PE=1 SV=3	3.79937e-15	1	K	LSSMLGVPAQETAPAK(1)LIVYLQR	3	1.3306	1	1	0	4944300	481461	3.36028
sp|P62888|RL30_HUMAN	44	>sp|P62888|RL30_HUMAN 60S ribosomal protein L30 OS=Homo sapiens OX=9606 GN=RPL30 PE=1 SV=2	5.89159e-07	1	K	AK(1)LVILANNCPALR	3	0.077965	1.91881e+07	1.44805e+07	-0.406101	90787000	8.84564e+06	3.35945
sp|Q9H1P3|OSBL2_HUMAN	209	>sp|Q9H1P3|OSBL2_HUMAN Oxysterol-binding protein-related protein 2 OS=Homo sapiens OX=9606 GN=OSBPL2 PE=1 SV=1	0.00798779	1	K	FWGK(1)SVEAEPR	3	0.63499	7.32782e+06	5.79795e+06	-0.337841	13112000	1.30111e+06	3.33307
sp|Q9P265|DIP2B_HUMAN	293	>sp|Q9P265|DIP2B_HUMAN Disco-interacting protein 2 homolog B OS=Homo sapiens OX=9606 GN=DIP2B PE=1 SV=3	3.71397e-134	1	K	RPPLK(1)EFFVDDSEEIVEVPQPDPNQPKPEGR	4	0.34814	1	1	0	128770000	1.2796e+07	3.33103
sp|Q15154|PCM1_HUMAN	393	>sp|Q15154|PCM1_HUMAN Pericentriolar material 1 protein OS=Homo sapiens OX=9606 GN=PCM1 PE=1 SV=4	0.000327003	1	K	LPDEK(1)VELFSK	3	-1.1161	1	5.32562e+06	22.3445	37739000	3.78162e+06	3.31898
sp|P50990|TCPQ_HUMAN	254	>sp|P50990|TCPQ_HUMAN T-complex protein 1 subunit theta OS=Homo sapiens OX=9606 GN=CCT8 PE=1 SV=4	2.8602e-05	1	K	IAVYSCPFDGMITETK(0.975)GTVLIK(0.025)	3	1.5153	1	1	0	14155000	1.45753e+06	3.27971
sp|P25445|TNR6_HUMAN	309	>sp|P25445|TNR6_HUMAN Tumor necrosis factor receptor superfamily member 6 OS=Homo sapiens OX=9606 GN=FAS PE=1 SV=1	3.66929e-08	1	K	ANLCTLAEK(1)IQTIILK	3	-0.49488	1	1	0	9439700	980006	3.26788
sp|Q16629|SRSF7_HUMAN	24	>sp|Q16629|SRSF7_HUMAN Serine/arginine-rich splicing factor 7 OS=Homo sapiens OX=9606 GN=SRSF7 PE=1 SV=1	2.259e-06	1	K	VYVGNLGTGAGK(1)GELER	3	-0.24323	5.48018e+07	9.13127e+07	0.736592	82396000	8.77452e+06	3.23118
sp|Q9UBZ4|APEX2_HUMAN	338	>sp|Q9UBZ4|APEX2_HUMAN DNA-(apurinic or apyrimidinic site) lyase 2 OS=Homo sapiens OX=9606 GN=APEX2 PE=1 SV=1	5.27056e-05	1	K	FLPEFAGTQLK(1)ILR	3	-0.077472	1.74459e+07	1.57925e+07	-0.143654	8375200	899461	3.21899
sp|P67775|PP2AA_HUMAN	21	>sp|P67775|PP2AA_HUMAN Serine/threonine-protein phosphatase 2A catalytic subunit alpha isoform OS=Homo sapiens OX=9606 GN=PPP2CA PE=1 SV=1	5.6506e-41	1;2	K	ELDQWIEQLNECK(1)QLSESQVK	3	0.48985	5.58541e+06	3.58153e+06	-0.641088	25718000	2.76267e+06	3.21864
sp|O14745|NHRF1_HUMAN	101	>sp|O14745|NHRF1_HUMAN Na(+)/H(+) exchange regulatory cofactor NHE-RF1 OS=Homo sapiens OX=9606 GN=SLC9A3R1 PE=1 SV=4	3.79418e-19	1	K	LLVVDPETDEQLQK(1)LGVQVR	3	-0.84358	1.61434e+07	4.5589e+06	-1.82418	34677000	3.77551e+06	3.19924
sp|O00567|NOP56_HUMAN	88	>sp|O00567|NOP56_HUMAN Nucleolar protein 56 OS=Homo sapiens OX=9606 GN=NOP56 PE=1 SV=4	0.000856201	1	K	LLLETHLPSK(0.432)K(0.568)	3	0.60557	1	6.20657e+06	22.5654	6075300	666698	3.18785
sp|Q9UNN5|FAF1_HUMAN	139	>sp|Q9UNN5|FAF1_HUMAN FAS-associated factor 1 OS=Homo sapiens OX=9606 GN=FAF1 PE=1 SV=2	2.15968e-08	1	K	QILENELQIPVSK(0.959)MLLK(0.041)	3	0.057659	4.06131e+07	1.76818e+06	-4.52161	8653800	965403	3.16413
sp|Q96CS3|FAF2_HUMAN	329	>sp|Q96CS3|FAF2_HUMAN FAS-associated factor 2 OS=Homo sapiens OX=9606 GN=FAF2 PE=1 SV=2	3.42429e-19	1	K	RKEEEVQQQK(1)LAEER	4	0.34541	1.96436e+07	4.02061e+06	-2.28857	19483000	2.20005e+06	3.14661
sp|P18206|VINC_HUMAN	219	>sp|P18206|VINC_HUMAN Vinculin OS=Homo sapiens OX=9606 GN=VCL PE=1 SV=4	1.26249e-21	1	K	NSK(1)NQGIEEALK	3	-0.57657	1.35455e+08	1.34164e+08	-0.0138058	3889800	439337	3.1463
sp|O43175|SERA_HUMAN	351	>sp|O43175|SERA_HUMAN D-3-phosphoglycerate dehydrogenase OS=Homo sapiens OX=9606 GN=PHGDH PE=1 SV=4	3.21268e-65	1	K	AWAGSPK(1)GTIQVITQGTSLK	3	-0.74805	1.71723e+08	1.50125e+08	-0.193924	44923000	5.09727e+06	3.13966
sp|P07900|HS90A_HUMAN	224	>sp|P07900|HS90A_HUMAN Heat shock protein HSP 90-alpha OS=Homo sapiens OX=9606 GN=HSP90AA1 PE=1 SV=5	8.82061e-09	1	K	HSQFIGYPITLFVEK(1)ER	3	1.2736	1	1	0	15639000	1.77563e+06	3.13875
sp|Q9Y6I3|EPN1_HUMAN	11	>sp|Q9Y6I3|EPN1_HUMAN Epsin-1 OS=Homo sapiens OX=9606 GN=EPN1 PE=1 SV=2	4.98619e-07	1	K	QMK(1)NIVHNYSEAEIK	2	0.95158	5.32125e+07	7.98453e+07	0.585441	720100	86437.6	3.05847
sp|Q99572|P2RX7_HUMAN	502	>sp|Q99572|P2RX7_HUMAN P2X purinoceptor 7 OS=Homo sapiens OX=9606 GN=P2RX7 PE=1 SV=4	5.3777e-05	1	K	K(1)PGACITTSELFR	3	0.58382	2.18194e+06	1.93056e+06	-0.176596	17111000	2.05609e+06	3.05695
sp|P00558|PGK1_HUMAN	291	>sp|P00558|PGK1_HUMAN Phosphoglycerate kinase 1 OS=Homo sapiens OX=9606 GN=PGK1 PE=1 SV=3	2.16761e-05	1	K	ITLPVDFVTADK(0.913)FDENAK(0.087)	3	0.48976	1.87238e+06	1.41234e+06	-0.406786	9950800	1.21652e+06	3.03205
sp|Q96PH1|NOX5_HUMAN	633	>sp|Q96PH1|NOX5_HUMAN NADPH oxidase 5 OS=Homo sapiens OX=9606 GN=NOX5 PE=1 SV=1	0.00162534	1	K	LHK(1)VDFIWINR	3	0.52392	1	1	0	15509000	1.9125e+06	3.01957
sp|P29692|EF1D_HUMAN	117	>sp|P29692|EF1D_HUMAN Elongation factor 1-delta OS=Homo sapiens OX=9606 GN=EEF1D PE=1 SV=5	0.00213871	1	K	LNVLEK(1)SSPGHR	3	0.56284	7.84769e+06	4.34002e+06	-0.854565	1956100	244250	3.00155
sp|O15031|PLXB2_HUMAN	1834	>sp|O15031|PLXB2_HUMAN Plexin-B2 OS=Homo sapiens OX=9606 GN=PLXNB2 PE=1 SV=3	0.000171857	1	K	LQQIAAALENK(1)VTDL	2	0.75214	1.46952e+06	920351	-0.675091	5179400	647243	3.0004
sp|P50402|EMD_HUMAN	88	>sp|P50402|EMD_HUMAN Emerin OS=Homo sapiens OX=9606 GN=EMD PE=1 SV=1	6.44667e-12	1	K	KEDALLYQSK(1)GYNDDYYEESYFTTR	4	0.11635	1	2.64532e+06	21.335	55463000	7.08346e+06	2.969
sp|P49588|SYAC_HUMAN	558	>sp|P49588|SYAC_HUMAN Alanine--tRNA ligase, cytoplasmic OS=Homo sapiens OX=9606 GN=AARS PE=1 SV=2	0.00586796	1	K	VDDSSEDK(0.997)TEFTVK(0.003)	3	-1.1908	1.98284e+07	1	-24.2411	10733000	1.41342e+06	2.9248
sp|P55061|BI1_HUMAN	28	>sp|P55061|BI1_HUMAN Bax inhibitor 1 OS=Homo sapiens OX=9606 GN=TMBIM6 PE=1 SV=2	0.000552475	1	K	FSHITPSTQQHLK(0.97)K(0.03)	4	1.1471	5.46039e+06	6.91773e+06	0.341296	3213300	429646	2.90283
sp|Q99835|SMO_HUMAN	440	>sp|Q99835|SMO_HUMAN Smoothened homolog OS=Homo sapiens OX=9606 GN=SMO PE=1 SV=1	0.00116867	1	K	SNHPGLLSEK(0.997)AASK(0.003)	3	0.22227	1	3.97811e+06	21.9237	17231000	2.30917e+06	2.89956
sp|Q709C8|VP13C_HUMAN	1573	>sp|Q709C8|VP13C_HUMAN Vacuolar protein sorting-associated protein 13C OS=Homo sapiens OX=9606 GN=VPS13C PE=1 SV=1	5.39533e-06	1	K	ESELK(1)PLVGESR	3	0.2693	2.11834e+08	8.15987e+07	-1.37632	1778100	242197	2.87608
sp|Q9GZZ1|NAA50_HUMAN	37	>sp|Q9GZZ1|NAA50_HUMAN N-alpha-acetyltransferase 50 OS=Homo sapiens OX=9606 GN=NAA50 PE=1 SV=1	9.02214e-09	1	K	LNQVIFPVSYNDK(0.019)FYK(0.979)DVLEVGELAK(0.002)	4	1.2291	1	3.06753e+07	24.8706	5520200	775057	2.83235
sp|P78395|PRAME_HUMAN	126	>sp|P78395|PRAME_HUMAN Melanoma antigen preferentially expressed in tumors OS=Homo sapiens OX=9606 GN=PRAME PE=1 SV=1	0.000149642	1	K	K(1)NSHQDFWTVWSGNR	3	-0.30144	1.15561e+06	4.39168e+07	5.24805	17288000	2.48466e+06	2.79865
sp|P12268|IMDH2_HUMAN	208	>sp|P12268|IMDH2_HUMAN Inosine-5'-monophosphate dehydrogenase 2 OS=Homo sapiens OX=9606 GN=IMPDH2 PE=1 SV=2	4.53822e-36	1	K	GK(1)LPIVNEDDELVAIIAR	3	0.12893	1	6.50005e+06	22.632	22647000	3.26579e+06	2.79382
sp|Q15758|AAAT_HUMAN	10	>sp|Q15758|AAAT_HUMAN Neutral amino acid transporter B(0) OS=Homo sapiens OX=9606 GN=SLC1A5 PE=1 SV=2	2.77634e-68	1	K	DSK(1)GLAAAEPTANGGLALASIEDQGAAAGGYCGSR	3	-0.44564	3.41904e+07	1.19398e+07	-1.51781	67700000	1.01757e+07	2.73403
sp|Q9Y6K9|NEMO_HUMAN	309	>sp|Q9Y6K9|NEMO_HUMAN NF-kappa-B essential modulator OS=Homo sapiens OX=9606 GN=IKBKG PE=1 SV=2	0.00176271	1	K	AQADIYK(1)ADFQAER	2	-1.0261	1	1.88127e+07	24.1652	28237000	4.2488e+06	2.73246
sp|P46977|STT3A_HUMAN	655	>sp|P46977|STT3A_HUMAN Dolichyl-diphosphooligosaccharide--protein glycosyltransferase subunit STT3A OS=Homo sapiens OX=9606 GN=STT3A PE=1 SV=2	3.40826e-05	1	K	FGQVYTEAK(1)RPPGFDR	3	0.018685	1.60444e+07	1.10981e+07	-0.531762	2786500	422021	2.72307
sp|Q9BXP2|S12A9_HUMAN	528	>sp|Q9BXP2|S12A9_HUMAN Solute carrier family 12 member 9 OS=Homo sapiens OX=9606 GN=SLC12A9 PE=1 SV=1	0.000550208	1	K	DHVK(1)FWRPQLLLLVGNPR	4	-0.22909	1	1	0	1398300	211939	2.72195
sp|Q9UGQ2|FLOWR_HUMAN	163	>sp|Q9UGQ2|FLOWR_HUMAN Calcium channel flower homolog OS=Homo sapiens OX=9606 GN=CACFD1 PE=1 SV=1	4.59717e-55	1	K	QQADEEK(1)LAETLEGEL	2	0.94744	1.28087e+06	1.12596e+06	-0.18597	30726000	4.67591e+06	2.71614
sp|Q9UL42|PNMA2_HUMAN	256	>sp|Q9UL42|PNMA2_HUMAN Paraneoplastic antigen Ma2 OS=Homo sapiens OX=9606 GN=PNMA2 PE=1 SV=2	0.00402619	1	K	YLK(1)TYQEEGEK	3	-0.9327	1.53327e+07	1.52111e+07	-0.0114891	225670	34543.5	2.70773
sp|Q9NXW2|DJB12_HUMAN	177	>sp|Q9NXW2|DJB12_HUMAN DnaJ homolog subfamily B member 12 OS=Homo sapiens OX=9606 GN=DNAJB12 PE=1 SV=4	0.0011571	1	K	KQYDQFGDDK(1)SQAAR	3	-1.2775	1.85157e+07	1	-24.1422	22147000	3.39215e+06	2.70684
sp|P53621|COPA_HUMAN	632	>sp|P53621|COPA_HUMAN Coatomer subunit alpha OS=Homo sapiens OX=9606 GN=COPA PE=1 SV=2	0.00304067	1	K	LVGQSIIAYLQK(0.45)K(0.55)	3	0.38102	8.37382e+06	1	-22.9975	2458500	376805	2.70589
sp|Q9H0L4|CSTFT_HUMAN	189	>sp|Q9H0L4|CSTFT_HUMAN Cleavage stimulation factor subunit 2 tau variant OS=Homo sapiens OX=9606 GN=CSTF2T PE=1 SV=1	0.00219131	1	K	IMDPEIALK(1)ILHR	3	2.0336	1	1	0	2779300	429231	2.6949
sp|Q99536|VAT1_HUMAN	372	>sp|Q99536|VAT1_HUMAN Synaptic vesicle membrane protein VAT-1 homolog OS=Homo sapiens OX=9606 GN=VAT1 PE=1 SV=2	3.13591e-12	1	K	VADAMK(1)QMQEK	2	-0.30928	1	1	0	10179000	1.60063e+06	2.66888
sp|P61313|RL15_HUMAN	83	>sp|P61313|RL15_HUMAN 60S ribosomal protein L15 OS=Homo sapiens OX=9606 GN=RPL15 PE=1 SV=2	0.000190479	1	K	GATYGK(1)PVHHGVNQLK	3	-0.66643	1	1.64119e+07	23.9682	5976800	941915	2.6657
sp|P08134|RHOC_HUMAN;sp|P61586|RHOA_HUMAN	104;104	>sp|P08134|RHOC_HUMAN Rho-related GTP-binding protein RhoC OS=Homo sapiens OX=9606 GN=RHOC PE=1 SV=1;>sp|P61586|RHOA_HUMAN Transforming protein RhoA OS=Homo sapiens OX=9606 GN=RHOA PE=1 SV=1	0.000930547	1	K	WTPEVK(1)HFCPNVPIILVGNK	3	2.023	2.02752e+06	2.79947e+06	0.465433	2124300	334877	2.66529
sp|P26038|MOES_HUMAN	79	>sp|P26038|MOES_HUMAN Moesin OS=Homo sapiens OX=9606 GN=MSN PE=1 SV=3	1.95066e-05	1	K	KESPLLFK(1)FR	3	0.16938	7.91464e+07	7.10111e+07	-0.156479	62484000	9.85811e+06	2.6641
sp|Q96QD8|S38A2_HUMAN	33	>sp|Q96QD8|S38A2_HUMAN Sodium-coupled neutral amino acid transporter 2 OS=Homo sapiens OX=9606 GN=SLC38A2 PE=1 SV=2	7.86739e-13	1	K	FSISPDEDSSSYSSNSDFNYSYPTK(0.998)QAALK(0.002)	3	0.071038	2.29183e+07	1.63173e+07	-0.490097	67726000	1.06856e+07	2.66405
sp|Q14974|IMB1_HUMAN	541	>sp|Q14974|IMB1_HUMAN Importin subunit beta-1 OS=Homo sapiens OX=9606 GN=KPNB1 PE=1 SV=2	6.43716e-46	1	K	SSAYESLMEIVK(0.221)NSAK(0.779)	2	-0.97017	1	2.088e+06	20.9937	8732100	1.41317e+06	2.62739
sp|Q9NPF0|CD320_HUMAN	269	>sp|Q9NPF0|CD320_HUMAN CD320 antigen OS=Homo sapiens OX=9606 GN=CD320 PE=1 SV=1	1.52956e-24	1	K	LRPLGLLVAMK(1)ESLLLSEQK	3	0.35708	3.16332e+06	4.00672e+06	0.340981	11872000	1.94659e+06	2.60854
sp|P36578|RL4_HUMAN	327	>sp|P36578|RL4_HUMAN 60S ribosomal protein L4 OS=Homo sapiens OX=9606 GN=RPL4 PE=1 SV=5	0.00625927	1	K	IMLK(1)LNPYAK	3	-2.0743	1.24519e+07	1.6768e+07	0.429348	6381700	1.06408e+06	2.58433
sp|P62820|RAB1A_HUMAN	191	>sp|P62820|RAB1A_HUMAN Ras-related protein Rab-1A OS=Homo sapiens OX=9606 GN=RAB1A PE=1 SV=3	0.0492097	1	K	SNVK(1)IQSTPVK	2	0.29584	6.38734e+06	4.31769e+06	-0.564954	5029800	845593	2.57247
sp|P60953|CDC42_HUMAN	184	>sp|P60953|CDC42_HUMAN Cell division control protein 42 homolog OS=Homo sapiens OX=9606 GN=CDC42 PE=1 SV=2	1.53446e-09	1	K	NVFDEAILAALEPPEPK(0.436)K(0.564)	3	0.076782	9.60698e+06	1	-23.1957	7076200	1.19632e+06	2.56437
sp|P68363|TBA1B_HUMAN;sp|Q71U36|TBA1A_HUMAN;sp|Q13748|TBA3C_HUMAN;sp|Q6PEY2|TBA3E_HUMAN;sp|Q9BQE3|TBA1C_HUMAN	338;338;338;338;338	>sp|P68363|TBA1B_HUMAN Tubulin alpha-1B chain OS=Homo sapiens OX=9606 GN=TUBA1B PE=1 SV=1;>sp|Q71U36|TBA1A_HUMAN Tubulin alpha-1A chain OS=Homo sapiens OX=9606 GN=TUBA1A PE=1 SV=1;>sp|Q13748|TBA3C_HUMAN Tubulin alpha-3C/D chain OS=Homo sapiens OX=9606 GN=T	4.92812e-12	1;2	K	DVNAAIATIK(1)TK(1)R	3	-0.18946	1.24321e+09	1.40843e+08	-3.14191	9363000	1.60271e+06	2.54646
sp|P45974|UBP5_HUMAN	575	>sp|P45974|UBP5_HUMAN Ubiquitin carboxyl-terminal hydrolase 5 OS=Homo sapiens OX=9606 GN=USP5 PE=1 SV=2	1.2813e-05	1	K	FASFPDYLVIQIK(0.121)K(0.879)	3	1.2464	1	1	0	3719200	638029	2.5433
sp|P46940|IQGA1_HUMAN	1475	>sp|P46940|IQGA1_HUMAN Ras GTPase-activating-like protein IQGAP1 OS=Homo sapiens OX=9606 GN=IQGAP1 PE=1 SV=1	4.80859e-07	1	K	LTELGTVDPK(0.981)NK(0.019)	3	-1.3944	5.17717e+07	2.82313e+06	-4.19679	1537000	264059	2.54118
sp|P46940|IQGA1_HUMAN	1477	>sp|P46940|IQGA1_HUMAN Ras GTPase-activating-like protein IQGAP1 OS=Homo sapiens OX=9606 GN=IQGAP1 PE=1 SV=1	4.80859e-07	1	K	LTELGTVDPK(0.415)NK(0.585)YQELINDIAR	3	0.27377	5.17717e+07	1	-25.6257	1537000	264059	2.54118
sp|P26599|PTBP1_HUMAN	218	>sp|P26599|PTBP1_HUMAN Polypyrimidine tract-binding protein 1 OS=Homo sapiens OX=9606 GN=PTBP1 PE=1 SV=1	1.00733e-05	1	K	IITFTK(1)NNQFQALLQYADPVSAQHAK	4	-1.0655	1	1	0	4060400	710729	2.51425
sp|P62258|1433E_HUMAN	73	>sp|P62258|1433E_HUMAN 14-3-3 protein epsilon OS=Homo sapiens OX=9606 GN=YWHAE PE=1 SV=1	1.35731e-25	1	K	IISSIEQKEENK(0.993)GGEDK(0.007)	3	-1.6338	2.5343e+07	2.55888e+07	0.0139274	7163100	1.25418e+06	2.51384
sp|Q14677|EPN4_HUMAN	251	>sp|Q14677|EPN4_HUMAN Clathrin interactor 1 OS=Homo sapiens OX=9606 GN=CLINT1 PE=1 SV=1	0.0097916	1	K	GEFK(1)DEEETVTTK	3	0.39071	8.73097e+06	1	-23.0577	6164400	1.08124e+06	2.51127
sp|Q5TAQ9|DCAF8_HUMAN	236	>sp|Q5TAQ9|DCAF8_HUMAN DDB1- and CUL4-associated factor 8 OS=Homo sapiens OX=9606 GN=DCAF8 PE=1 SV=1	1.24921e-05	1	K	RQPVLDFESGHK(0.999)SNVFQAK(0.001)	4	0.4112	1	3.18813e+07	24.9262	9929700	1.75217e+06	2.50261
sp|P15531|NDKA_HUMAN	56	>sp|P15531|NDKA_HUMAN Nucleoside diphosphate kinase A OS=Homo sapiens OX=9606 GN=NME1 PE=1 SV=1	2.46567e-12	1	K	EHYVDLK(1)DRPFFAGLVK	4	0.043466	5.47669e+07	1.46986e+08	1.4243	96312000	1.73958e+07	2.46898
sp|Q9NRC1|ST7_HUMAN	384	>sp|Q9NRC1|ST7_HUMAN Suppressor of tumorigenicity 7 protein OS=Homo sapiens OX=9606 GN=ST7 PE=1 SV=1	0.00352156	1	K	AVSDK(1)FSPEAASR	3	3.1582	1.48932e+07	8.6925e+06	-0.776807	55939000	1.03661e+07	2.43198
sp|Q9NR45|SIAS_HUMAN	145	>sp|Q9NR45|SIAS_HUMAN Sialic acid synthase OS=Homo sapiens OX=9606 GN=NANS PE=1 SV=2	0.00027071	1	K	VGSGDTNNFPYLEK(0.926)TAK(0.074)	3	0.39379	1	2.80482e+06	21.4195	21223000	3.94415e+06	2.42784
sp|Q9UMX9|S45A2_HUMAN	291	>sp|Q9UMX9|S45A2_HUMAN Membrane-associated transporter protein OS=Homo sapiens OX=9606 GN=SLC45A2 PE=1 SV=2	1.78209e-33	1	K	NGYVNPELAMQGAK(0.394)NK(0.606)	3	-0.17146	9.51878e+06	1	-23.1823	245130000	4.60417e+07	2.41253
sp|O43520|AT8B1_HUMAN	664	>sp|O43520|AT8B1_HUMAN Phospholipid-transporting ATPase IC OS=Homo sapiens OX=9606 GN=ATP8B1 PE=1 SV=3	4.82584e-06	1	K	EIEEK(1)EFTEWNKK	4	-0.34758	3.59194e+07	4.82562e+07	0.425951	815240	154088	2.40347
sp|P08758|ANXA5_HUMAN	58	>sp|P08758|ANXA5_HUMAN Annexin A5 OS=Homo sapiens OX=9606 GN=ANXA5 PE=1 SV=2	2.26171e-07	1	K	QEISAAFK(1)TLFGR	3	-3.116	7.93298e+06	1	-22.9194	2345900	444604	2.39955
sp|P10721|KIT_HUMAN	918	>sp|P10721|KIT_HUMAN Mast/stem cell growth factor receptor Kit OS=Homo sapiens OX=9606 GN=KIT PE=1 SV=1	0.000101181	1	K	RPTFK(1)QIVQLIEK	3	0.13836	1	1	0	20180000	3.84467e+06	2.39199
sp|Q7Z5G4|GOGA7_HUMAN	103	>sp|Q7Z5G4|GOGA7_HUMAN Golgin subfamily A member 7 OS=Homo sapiens OX=9606 GN=GOLGA7 PE=1 SV=2	4.96509e-11	1	K	YIQEQNEK(1)IYAPQGLLLTDPIER	3	0.35413	1	1	0	48302000	9.20664e+06	2.39134
sp|P17980|PRS6A_HUMAN	300	>sp|P17980|PRS6A_HUMAN 26S proteasome regulatory subunit 6A OS=Homo sapiens OX=9606 GN=PSMC3 PE=1 SV=3	0.00660947	1	K	FDSEK(1)AGDREVQR	3	0.65953	1	4.58771e+06	22.1293	2548000	487693	2.38532
sp|P11142|HSP7C_HUMAN;sp|P54652|HSP72_HUMAN	451;454	>sp|P11142|HSP7C_HUMAN Heat shock cognate 71 kDa protein OS=Homo sapiens OX=9606 GN=HSPA8 PE=1 SV=1;>sp|P54652|HSP72_HUMAN Heat shock-related 70 kDa protein 2 OS=Homo sapiens OX=9606 GN=HSPA2 PE=1 SV=1	0.000964539	1	K	AMTK(1)DNNLLGK	3	-1.0849	7.87068e+07	1.11289e+08	0.499753	1416400	271379	2.38385
sp|O95503|CBX6_HUMAN	60	>sp|O95503|CBX6_HUMAN Chromobox protein homolog 6 OS=Homo sapiens OX=9606 GN=CBX6 PE=1 SV=1	0.0170421	1	K	LIAAFEQK(1)ER	3	1.5594	1.34658e+06	2.26756e+06	0.751838	9576100	1.84688e+06	2.37435
sp|P05023|AT1A1_HUMAN	177	>sp|P05023|AT1A1_HUMAN Sodium/potassium-transporting ATPase subunit alpha-1 OS=Homo sapiens OX=9606 GN=ATP1A1 PE=1 SV=1	6.66521e-25	1	K	NGEK(1)MSINAEEVVVGDLVEVK	3	0.6148	1.56864e+06	1	-20.5811	20754000	4.02981e+06	2.3646
sp|Q92995|UBP13_HUMAN	435	>sp|Q92995|UBP13_HUMAN Ubiquitin carboxyl-terminal hydrolase 13 OS=Homo sapiens OX=9606 GN=USP13 PE=1 SV=2	0.000266537	1	K	AFVSK(1)SHPEFSSNR	3	1.6665	9.94522e+06	412413	-4.59184	227130	44121.9	2.36395
sp|P17302|CXA1_HUMAN	258	>sp|P17302|CXA1_HUMAN Gap junction alpha-1 protein OS=Homo sapiens OX=9606 GN=GJA1 PE=1 SV=2	2.65547e-72	1	K	SDPYHATSGALSPAK(1)DCGSQK	2	0.23694	3.62701e+08	2.69348e+08	-0.429313	215970000	4.1965e+07	2.36357
sp|P49792|RBP2_HUMAN	2935	>sp|P49792|RBP2_HUMAN E3 SUMO-protein ligase RanBP2 OS=Homo sapiens OX=9606 GN=RANBP2 PE=1 SV=2	0.000313741	1	K	SGEEDEEILFK(1)ER	3	-0.54193	1.62772e+07	1	-23.9564	24000000	4.76622e+06	2.33212
sp|P62330|ARF6_HUMAN	58	>sp|P62330|ARF6_HUMAN ADP-ribosylation factor 6 OS=Homo sapiens OX=9606 GN=ARF6 PE=1 SV=2	2.22744e-07	1	K	LGQSVTTIPTVGFNVETVTYK(0.151)NVK(0.849)	3	-0.02865	1	1	0	2833600	563020	2.33138
sp|Q6ZWE6|PKHM3_HUMAN	84	>sp|Q6ZWE6|PKHM3_HUMAN Pleckstrin homology domain-containing family M member 3 OS=Homo sapiens OX=9606 GN=PLEKHM3 PE=2 SV=2	0.00451581	1	K	LLETK(1)AQNVFPAK	3	0.46944	2.55176e+07	1.37818e+06	-4.21066	913890	183575	2.31565
sp|Q63HK5|TSH3_HUMAN	623	>sp|Q63HK5|TSH3_HUMAN Teashirt homolog 3 OS=Homo sapiens OX=9606 GN=TSHZ3 PE=1 SV=2	0.0244558	1	K	VTEK(0.003)VAK(0.994)VEEK(0.003)	3	-0.46968	1	1.11999e+07	23.417	8271100	1.6687e+06	2.30935
sp|P62330|ARF6_HUMAN	69	>sp|P62330|ARF6_HUMAN ADP-ribosylation factor 6 OS=Homo sapiens OX=9606 GN=ARF6 PE=1 SV=2	1.50856e-08	1	K	FNVWDVGGQDK(1)IRPLWR	4	-0.92957	1	3.91359e+07	25.222	22693000	4.62483e+06	2.29478
sp|Q9NR31|SAR1A_HUMAN	146	>sp|Q9NR31|SAR1A_HUMAN GTP-binding protein SAR1a OS=Homo sapiens OX=9606 GN=SAR1A PE=1 SV=1	0.00193721	1	K	TDAISEEK(1)LR	2	-1.1421	2.51581e+07	2.41194e+07	-0.0608333	18397000	3.79335e+06	2.27793
sp|P30626|SORCN_HUMAN	127	>sp|P30626|SORCN_HUMAN Sorcin OS=Homo sapiens OX=9606 GN=SRI PE=1 SV=1	5.96874e-15	1	K	SGTVDPQELQK(1)ALTTMGFR	3	-1.7823	1.33551e+07	3.58636e+06	-1.8968	2679700	562116	2.25313
sp|P78527|PRKDC_HUMAN	263	>sp|P78527|PRKDC_HUMAN DNA-dependent protein kinase catalytic subunit OS=Homo sapiens OX=9606 GN=PRKDC PE=1 SV=3	0.00845087	1	K	AIRPQIDLK(1)R	3	1.0592	7.5748e+06	1.0743e+07	0.504122	229800	48578.7	2.24198
sp|O60779|S19A2_HUMAN	231	>sp|O60779|S19A2_HUMAN Thiamine transporter 1 OS=Homo sapiens OX=9606 GN=SLC19A2 PE=1 SV=2	3.63694e-10	1	K	VNGIK(1)VQNGGIVTDTPASNHLPGWEDIESK	4	0.28125	1	1	0	21984000	4.74703e+06	2.21136
sp|P30153|2AAA_HUMAN	266	>sp|P30153|2AAA_HUMAN Serine/threonine-protein phosphatase 2A 65 kDa regulatory subunit A alpha isoform OS=Homo sapiens OX=9606 GN=PPP2R1A PE=1 SV=4	0.000604294	1	K	YMVADK(1)FTELQK	3	-0.013078	7.36013e+07	4.69144e+07	-0.649702	6951800	1.51045e+06	2.20241
sp|O43809|CPSF5_HUMAN	29	>sp|O43809|CPSF5_HUMAN Cleavage and polyadenylation specificity factor subunit 5 OS=Homo sapiens OX=9606 GN=NUDT21 PE=1 SV=1	3.59691e-08	1	K	YIQQTK(1)PLTLER	2	-0.39772	1.48757e+08	7.73787e+07	-0.942949	977130	215654	2.17983
sp|Q9H7P6|MB12B_HUMAN	290	>sp|Q9H7P6|MB12B_HUMAN Multivesicular body subunit 12B OS=Homo sapiens OX=9606 GN=MVB12B PE=1 SV=2	1.63949e-18	1	K	SLAEIEK(1)EYEYSFR	3	-2.2347	4.89103e+06	1	-22.2217	14385000	3.18306e+06	2.17608
sp|Q709C8|VP13C_HUMAN	2095	>sp|Q709C8|VP13C_HUMAN Vacuolar protein sorting-associated protein 13C OS=Homo sapiens OX=9606 GN=VPS13C PE=1 SV=1	0.0001645	1	K	IEK(1)DDSVRPNMTLK	3	-1.6642	9.07838e+07	4.14924e+07	-1.12959	13835000	3.06171e+06	2.17591
sp|Q8IY95|TM192_HUMAN	237	>sp|Q8IY95|TM192_HUMAN Transmembrane protein 192 OS=Homo sapiens OX=9606 GN=TMEM192 PE=1 SV=1	2.57783e-05	1	K	TISSLEEIVEK(1)QGDTIEYLKR	4	0.10376	1	1	0	21294000	4.74581e+06	2.16572
sp|O75190|DNJB6_HUMAN	196	>sp|O75190|DNJB6_HUMAN DnaJ homolog subfamily B member 6 OS=Homo sapiens OX=9606 GN=DNAJB6 PE=1 SV=2	0.0112026	1	K	SISTSTK(1)MVNGR	3	-0.39302	5.96367e+06	9.51953e+06	0.67469	173070	38639.8	2.1632
sp|P35241|RADI_HUMAN	209	>sp|P35241|RADI_HUMAN Radixin OS=Homo sapiens OX=9606 GN=RDX PE=1 SV=1	6.31319e-07	1	K	IAQDLEMYGVNYFEIK(0.5)NK(0.5)	3	-0.40426	1	1	0	28870000	6.45655e+06	2.16074
sp|P35241|RADI_HUMAN	211	>sp|P35241|RADI_HUMAN Radixin OS=Homo sapiens OX=9606 GN=RDX PE=1 SV=1	6.31319e-07	1	K	IAQDLEMYGVNYFEIK(0.5)NK(0.5)	3	-0.40426	1	1	0	28870000	6.45655e+06	2.16074
sp|P04350|TBB4A_HUMAN;sp|P07437|TBB5_HUMAN;sp|P68371|TBB4B_HUMAN;sp|Q13885|TBB2A_HUMAN;sp|Q9BVA1|TBB2B_HUMAN	216;216;216;216;216	>sp|P04350|TBB4A_HUMAN Tubulin beta-4A chain OS=Homo sapiens OX=9606 GN=TUBB4A PE=1 SV=2;>sp|P07437|TBB5_HUMAN Tubulin beta chain OS=Homo sapiens OX=9606 GN=TUBB PE=1 SV=2;>sp|P68371|TBB4B_HUMAN Tubulin beta-4B chain OS=Homo sapiens OX=9606 GN=TUBB4B PE=1	1.42449e-121	1	K	TLK(1)LTTPTYGDLNHLVSATMSGVTTCLR	4	0.066846	3.26724e+08	4.13401e+08	0.339471	120200000	2.71172e+07	2.14816
sp|Q9UBQ5|EIF3K_HUMAN	140	>sp|Q9UBQ5|EIF3K_HUMAN Eukaryotic translation initiation factor 3 subunit K OS=Homo sapiens OX=9606 GN=EIF3K PE=1 SV=1	0.00053808	1	K	K(1)FICHVVGITYQHIDR	4	-0.65879	5.40465e+06	1.93159e+07	1.83751	16578000	3.76781e+06	2.13747
sp|Q9NZB2|F120A_HUMAN	304	>sp|Q9NZB2|F120A_HUMAN Constitutive coactivator of PPAR-gamma-like protein 1 OS=Homo sapiens OX=9606 GN=FAM120A PE=1 SV=2	0.000163699	1	K	NIQDTSDLDAIAK(1)DVFQHSQSR	4	-0.99303	1	1	0	4448100	1.02824e+06	2.11301
sp|P46734|MP2K3_HUMAN	243	>sp|P46734|MP2K3_HUMAN Dual specificity mitogen-activated protein kinase kinase 3 OS=Homo sapiens OX=9606 GN=MAP2K3 PE=1 SV=2	6.00796e-06	1	K	INPELNQK(0.996)GYNVK(0.004)	3	-0.3836	1.9402e+07	2.29555e+07	0.242636	1714700	398337	2.10589
sp|Q13813|SPTN1_HUMAN	1187	>sp|Q13813|SPTN1_HUMAN Spectrin alpha chain, non-erythrocytic 1 OS=Homo sapiens OX=9606 GN=SPTAN1 PE=1 SV=3	0.0011544	1	K	DETDSK(1)TASPWK	2	-2.1015	1.63195e+07	1.20098e+07	-0.442384	76655	17907.8	2.09779
sp|P61586|RHOA_HUMAN	135	>sp|P61586|RHOA_HUMAN Transforming protein RhoA OS=Homo sapiens OX=9606 GN=RHOA PE=1 SV=1	3.52254e-05	1;2	K	MK(1)QEPVKPEEGRDMANR	4	-0.11401	5.50158e+06	4.42162e+06	-0.315268	21350000	4.99767e+06	2.09491
sp|O60784|TOM1_HUMAN	106	>sp|O60784|TOM1_HUMAN Target of Myb protein 1 OS=Homo sapiens OX=9606 GN=TOM1 PE=1 SV=2	0.000101514	1	K	TILPK(1)NNPPTIVHDK	4	0.70748	1	7.80404e+06	22.8958	34066000	7.97445e+06	2.09488
sp|O00567|NOP56_HUMAN	333	>sp|O00567|NOP56_HUMAN Nucleolar protein 56 OS=Homo sapiens OX=9606 GN=NOP56 PE=1 SV=4	1.61667e-10		K	YPASTVQILGAEK(1)ALFR	3	0.63369	1	1	0	773770	183013	2.07996
sp|Q86VP1|TAXB1_HUMAN	561	>sp|Q86VP1|TAXB1_HUMAN Tax1-binding protein 1 OS=Homo sapiens OX=9606 GN=TAX1BP1 PE=1 SV=2	0.0009544	1	K	YADELAK(1)MELK	3	-0.54846	2.17045e+07	1	-24.3715	24897000	5.91689e+06	2.07306
sp|Q6IAA8|LTOR1_HUMAN	20	>sp|Q6IAA8|LTOR1_HUMAN Ragulator complex protein LAMTOR1 OS=Homo sapiens OX=9606 GN=LAMTOR1 PE=1 SV=2	6.15216e-07	1	K	K(1)LLLDPSSPPTK	3	0.65051	9.18433e+07	4.61488e+07	-0.992883	60766000	1.44653e+07	2.07066
sp|O15403|MOT7_HUMAN	495	>sp|O15403|MOT7_HUMAN Monocarboxylate transporter 7 OS=Homo sapiens OX=9606 GN=SLC16A6 PE=1 SV=2	0.000196685	1	K	GK(1)TLQDIPEDFLEMDLAK	3	-0.24736	1	1	0	5584500	1.33129e+06	2.0686
sp|P19021|AMD_HUMAN	916	>sp|P19021|AMD_HUMAN Peptidyl-glycine alpha-amidating monooxygenase OS=Homo sapiens OX=9606 GN=PAM PE=1 SV=2	0.00071454	1	K	GK(1)GSGGLNLGNFFASR	3	0.98653	2.12489e+07	1	-24.3409	19466000	4.67505e+06	2.0579
sp|Q6YHU6|THADA_HUMAN	1008	>sp|Q6YHU6|THADA_HUMAN Thyroid adenoma-associated protein OS=Homo sapiens OX=9606 GN=THADA PE=1 SV=1	0.000324177		K	DTNDYFNQAK(0.951)ILK(0.049)	3	0.67005	4.95289e+06	1	-22.2398	27021000	6.49675e+06	2.05629
sp|P12268|IMDH2_HUMAN	293	>sp|P12268|IMDH2_HUMAN Inosine-5'-monophosphate dehydrogenase 2 OS=Homo sapiens OX=9606 GN=IMPDH2 PE=1 SV=2	1.65747e-06	1	K	DK(1)YPNLQVIGGNVVTAAQAK	3	0.41086	6.46607e+07	3.08554e+07	-1.06737	142190000	3.43492e+07	2.04947
sp|P55060|XPO2_HUMAN	934	>sp|P55060|XPO2_HUMAN Exportin-2 OS=Homo sapiens OX=9606 GN=CSE1L PE=1 SV=3	1.81811e-17	1	K	IHLAQSLHK(1)LSTACPGR	4	-0.48558	7.07909e+06	4.57269e+07	2.69141	64629000	1.56666e+07	2.04449
sp|P06733|ENOA_HUMAN	89	>sp|P06733|ENOA_HUMAN Alpha-enolase OS=Homo sapiens OX=9606 GN=ENO1 PE=1 SV=2	0.00288339	1	K	K(0.001)LNVTEQEK(0.998)IDK	2	0.32554	1.67692e+07	1.50968e+07	-0.151564	12452000	3.04827e+06	2.03032
sp|Q92995|UBP13_HUMAN	640	>sp|Q92995|UBP13_HUMAN Ubiquitin carboxyl-terminal hydrolase 13 OS=Homo sapiens OX=9606 GN=USP13 PE=1 SV=2	1.82319e-31	1	K	GLQPGEEELPDISPPIVIPDDSK(1)DR	3	0.14114	7.86588e+07	3.48037e+07	-1.17637	76437000	1.89955e+07	2.00862
sp|P62714|PP2AB_HUMAN	21	>sp|P62714|PP2AB_HUMAN Serine/threonine-protein phosphatase 2A catalytic subunit beta isoform OS=Homo sapiens OX=9606 GN=PPP2CB PE=1 SV=1	9.45855e-99	1	K	ELDQWVEQLNECK(1)QLNENQVR	3	-0.37275	1	1.19367e+07	23.5089	61904000	1.56177e+07	1.98685
sp|P08195|4F2_HUMAN	140	>sp|P08195|4F2_HUMAN 4F2 cell-surface antigen heavy chain OS=Homo sapiens OX=9606 GN=SLC3A2 PE=1 SV=3	7.3071e-95	1;2	K	EVELNELEPEKQPMNAASGAAMSLAGAEK(0.844)NGLVK(0.156)	4	-1.009	1.06115e+08	2.58697e+07	-2.03629	404690000	1.02159e+08	1.986
sp|P07741|APT_HUMAN	34	>sp|P07741|APT_HUMAN Adenine phosphoribosyltransferase OS=Homo sapiens OX=9606 GN=APRT PE=1 SV=2	0.00139553	1	K	DISPVLK(1)DPASFR	3	-0.88674	2.63836e+07	1.05167e+07	-1.32696	8180300	2.07747e+06	1.97732
sp|Q14152|EIF3A_HUMAN	420	>sp|Q14152|EIF3A_HUMAN Eukaryotic translation initiation factor 3 subunit A OS=Homo sapiens OX=9606 GN=EIF3A PE=1 SV=1	2.56826e-47	1	K	EQPEK(1)EPELQQYVPQLQNNTILR	3	-0.12146	2.34378e+07	2.87448e+07	0.294463	516390000	1.31321e+08	1.97537
sp|P84077|ARF1_HUMAN;sp|P61204|ARF3_HUMAN	142;142	>sp|P84077|ARF1_HUMAN ADP-ribosylation factor 1 OS=Homo sapiens OX=9606 GN=ARF1 PE=1 SV=2;>sp|P61204|ARF3_HUMAN ADP-ribosylation factor 3 OS=Homo sapiens OX=9606 GN=ARF3 PE=1 SV=2	1.67182e-65	1	K	QDLPNAMNAAEITDK(1)LGLHSLR	4	-0.69947	7.26713e+07	3.69122e+06	-4.29922	13189000	3.35622e+06	1.97443
sp|P11142|HSP7C_HUMAN	583	>sp|P11142|HSP7C_HUMAN Heat shock cognate 71 kDa protein OS=Homo sapiens OX=9606 GN=HSPA8 PE=1 SV=1	3.42457e-207	1	K	CNEIINWLDK(1)NQTAEKEEFEHQQK	5	0.017784	5.68336e+07	7.82359e+07	0.461087	353050000	9.00781e+07	1.97062
sp|Q96JC1|VPS39_HUMAN	204	>sp|Q96JC1|VPS39_HUMAN Vam6/Vps39-like protein OS=Homo sapiens OX=9606 GN=VPS39 PE=1 SV=2	6.67319e-06	1	K	ELFPTGK(1)QLEPLVAPLADGK	3	0.83555	2.38716e+06	1	-21.1869	4945300	1.27875e+06	1.95133
sp|Q14204|DYHC1_HUMAN	652	>sp|Q14204|DYHC1_HUMAN Cytoplasmic dynein 1 heavy chain 1 OS=Homo sapiens OX=9606 GN=DYNC1H1 PE=1 SV=5	0.000479318	1	K	DLPPVSGSIIWAK(1)QIDR	3	-1.5311	4.09944e+07	2.59809e+07	-0.657977	1378100	357876	1.94515
sp|Q8N0X7|SPART_HUMAN	390	>sp|Q8N0X7|SPART_HUMAN Spartin OS=Homo sapiens OX=9606 GN=SPART PE=1 SV=1	3.31036e-33	1	K	AK(1)DTSSEEVNLSHIVPCEPVPEEKPK	4	0.31586	8.43931e+07	9.47723e+07	0.167341	27504000	7.20969e+06	1.93163
sp|P06753|TPM3_HUMAN	221	>sp|P06753|TPM3_HUMAN Tropomyosin alpha-3 chain OS=Homo sapiens OX=9606 GN=TPM3 PE=1 SV=2	0.0112456	2	K	YSQK(0.241)EDK(0.962)YEEEIK(0.797)	3	-0.41327	2.80064e+06	7.04955e+06	1.33178	1725000	454820	1.92323
sp|P06753|TPM3_HUMAN	227	>sp|P06753|TPM3_HUMAN Tropomyosin alpha-3 chain OS=Homo sapiens OX=9606 GN=TPM3 PE=1 SV=2	0.0112456	2	K	YSQK(0.241)EDK(0.962)YEEEIK(0.797)	3	-0.41327	2.80064e+06	7.04955e+06	1.33178	1725000	454820	1.92323
sp|Q96PH1|NOX5_HUMAN	523	>sp|Q96PH1|NOX5_HUMAN NADPH oxidase 5 OS=Homo sapiens OX=9606 GN=NOX5 PE=1 SV=1	1.45596e-09	1	K	LYESFK(1)ASDPLGR	3	0.2652	1	4.46947e+06	22.0917	31567000	8.32774e+06	1.92242
sp|Q9Y277|VDAC3_HUMAN	110	>sp|Q9Y277|VDAC3_HUMAN Voltage-dependent anion-selective channel protein 3 OS=Homo sapiens OX=9606 GN=VDAC3 PE=1 SV=1	0.00118894	1	K	LTLDTIFVPNTGK(0.166)K(0.834)	3	0.93849	1	1	0	8426900	2.22889e+06	1.91868
sp|P83916|CBX1_HUMAN	9	>sp|P83916|CBX1_HUMAN Chromobox protein homolog 1 OS=Homo sapiens OX=9606 GN=CBX1 PE=1 SV=1	8.36679e-07	1	K	K(1)VEEVLEEEEEEYVVEK	3	1.4136	7.10936e+06	9.47168e+06	0.4139	7519700	2.01613e+06	1.89909
sp|Q68DH5|LMBD2_HUMAN	621	>sp|Q68DH5|LMBD2_HUMAN LMBR1 domain-containing protein 2 OS=Homo sapiens OX=9606 GN=LMBRD2 PE=1 SV=1	1.13092e-07	1	K	NIHTDPK(1)ESNFSDVNTNR	4	0.010804	2.37726e+07	1.07708e+07	-1.14217	21795000	5.84455e+06	1.89883
sp|P02545|LMNA_HUMAN	311	>sp|P02545|LMNA_HUMAN Prelamin-A/C OS=Homo sapiens OX=9606 GN=LMNA PE=1 SV=1	3.38027e-111	1	K	IDSLSAQLSQLQK(1)QLAAK	2	-0.03919	1.70646e+08	5.6688e+07	-1.58989	614750000	1.66809e+08	1.8818
sp|P23396|RS3_HUMAN	90	>sp|P23396|RS3_HUMAN 40S ribosomal protein S3 OS=Homo sapiens OX=9606 GN=RPS3 PE=1 SV=2	5.06839e-11	1	K	FGFPEGSVELYAEK(1)VATR	3	1.793	890751	1	-19.7647	6127500	1.70292e+06	1.84729
sp|P29401|TKT_HUMAN	254	>sp|P29401|TKT_HUMAN Transketolase OS=Homo sapiens OX=9606 GN=TKT PE=1 SV=3	2.35194e-05	1	K	GITGVEDK(0.997)ESWHGK(0.003)PLPK	4	-0.92657	1	3.27138e+07	24.9634	85021000	2.39288e+07	1.82907
sp|Q9Y2A7|NCKP1_HUMAN	81	>sp|Q9Y2A7|NCKP1_HUMAN Nck-associated protein 1 OS=Homo sapiens OX=9606 GN=NCKAP1 PE=1 SV=1	8.03078e-05	1	K	NNNQQLAQLQK(0.963)EK(0.037)	3	-0.27961	1.11801e+07	9.45583e+06	-0.241661	3099700	873994	1.82643
sp|P15559|NQO1_HUMAN	271	>sp|P15559|NQO1_HUMAN NAD(P)H dehydrogenase [quinone] 1 OS=Homo sapiens OX=9606 GN=NQO1 PE=1 SV=1	0.000726064	1	K	SIPTDNQIK(1)AR	3	0.68321	1.39028e+07	1.31798e+07	-0.0770453	45939	13251.8	1.79353
sp|Q15154|PCM1_HUMAN	1225	>sp|Q15154|PCM1_HUMAN Pericentriolar material 1 protein OS=Homo sapiens OX=9606 GN=PCM1 PE=1 SV=4	0.000121199	1	K	TPWLYEQEGEVEK(0.414)PFIK(0.586)	3	-1.5579	1	1	0	11409000	3.3209e+06	1.78052
sp|P08621|RU17_HUMAN	27	>sp|P08621|RU17_HUMAN U1 small nuclear ribonucleoprotein 70 kDa OS=Homo sapiens OX=9606 GN=SNRNP70 PE=1 SV=2	0.000831202	1	K	DPIPYLPPLEK(0.982)LPHEK(0.018)	4	-0.5317	1	1	0	9136300	2.66711e+06	1.77633
sp|P61266|STX1B_HUMAN	188	>sp|P61266|STX1B_HUMAN Syntaxin-1B OS=Homo sapiens OX=9606 GN=STX1B PE=1 SV=1	0.000501995	1	K	MDSQMTK(1)QALNEIETR	3	-2.3687	7.47161e+06	8.34674e+06	0.159794	12382000	3.61872e+06	1.77469
sp|Q15181|IPYR_HUMAN	228	>sp|Q15181|IPYR_HUMAN Inorganic pyrophosphatase OS=Homo sapiens OX=9606 GN=PPA1 PE=1 SV=2	0.00017376	1	K	STHDHWK(1)ALVTK	3	0.69045	1.60575e+07	1.08007e+07	-0.572126	917910	268837	1.77162
sp|Q14254|FLOT2_HUMAN	370	>sp|Q14254|FLOT2_HUMAN Flotillin-2 OS=Homo sapiens OX=9606 GN=FLOT2 PE=1 SV=2	5.89074e-05	1	K	MALVLEALPQIAAK(0.994)IAAPLTK(0.006)	3	0.85347	970071	1	-19.8877	10557000	3.09715e+06	1.76919
sp|Q9UN86|G3BP2_HUMAN	25	>sp|Q9UN86|G3BP2_HUMAN Ras GTPase-activating protein-binding protein 2 OS=Homo sapiens OX=9606 GN=G3BP2 PE=1 SV=2	0.000519557	1	K	QYYTLLNK(1)APEYLHR	3	0.46917	1	1.90884e+06	20.8643	80093000	2.35011e+07	1.76895
sp|O15126|SCAM1_HUMAN	65	>sp|O15126|SCAM1_HUMAN Secretory carrier-associated membrane protein 1 OS=Homo sapiens OX=9606 GN=SCAMP1 PE=1 SV=2	4.49769e-08	1	K	MPNVPNTQPAIMK(0.999)PTEEHPAYTQIAK(0.001)	4	-0.10621	1	1	0	59820000	1.76463e+07	1.76126
sp|Q9GZU1|MCLN1_HUMAN	552	>sp|Q9GZU1|MCLN1_HUMAN Mucolipin-1 OS=Homo sapiens OX=9606 GN=MCOLN1 PE=1 SV=1	1.22606e-37	1	K	HPGGAGAEESELQAYIAQCQDSPTSGK(1)FR	4	0.11372	1	1	0	20311000	5.99217e+06	1.76111
sp|Q9Y277|VDAC3_HUMAN	163	>sp|Q9Y277|VDAC3_HUMAN Voltage-dependent anion-selective channel protein 3 OS=Homo sapiens OX=9606 GN=VDAC3 PE=1 SV=1	0.00482398	1	K	SK(1)LSQNNFALGYK	3	-0.19041	1	3.29381e+06	21.6513	8172200	2.41598e+06	1.75812
sp|P55072|TERA_HUMAN	112	>sp|P55072|TERA_HUMAN Transitional endoplasmic reticulum ATPase OS=Homo sapiens OX=9606 GN=VCP PE=1 SV=4	8.64826e-09	1	K	LGDVISIQPCPDVK(0.139)YGK(0.861)	3	-0.86255	6.66168e+06	1.36963e+08	4.36176	370470000	1.10399e+08	1.74662
sp|O60784|TOM1_HUMAN	147	>sp|O60784|TOM1_HUMAN Target of Myb protein 1 OS=Homo sapiens OX=9606 GN=TOM1 PE=1 SV=2	6.59453e-52	1	K	K(1)GLEFPMTDLDMLSPIHTPQR	4	-0.31629	1.73164e+06	1	-20.7237	5121000	1.52633e+06	1.74636
sp|Q9Y2I1|NISCH_HUMAN	843	>sp|Q9Y2I1|NISCH_HUMAN Nischarin OS=Homo sapiens OX=9606 GN=NISCH PE=1 SV=3	0.00380317	1	K	QLLTFYK(1)VAGGCQER	3	0.17121	1	2.55621e+07	24.6075	932540	281266	1.72923
sp|Q9H6Y7|RN167_HUMAN	223	>sp|Q9H6Y7|RN167_HUMAN E3 ubiquitin-protein ligase RNF167 OS=Homo sapiens OX=9606 GN=RNF167 PE=1 SV=1	2.35471e-23	1	K	QIPTHDYQK(1)GDQYDVCAICLDEYEDGDKLR	5	0.32254	2.76629e+07	4.31605e+07	0.641759	91083000	2.75094e+07	1.72726
sp|Q9UJ41|RABX5_HUMAN	263	>sp|Q9UJ41|RABX5_HUMAN Rab5 GDP/GTP exchange factor OS=Homo sapiens OX=9606 GN=RABGEF1 PE=1 SV=2	3.47273e-190	1	K	LQREEEEAFASSQSSQGAQSLTFSK(1)FEEK	4	0.14564	6.48339e+07	4.91741e+07	-0.39885	84123000	2.56226e+07	1.71508
sp|Q9ULH0|KDIS_HUMAN	891	>sp|Q9ULH0|KDIS_HUMAN Kinase D-interacting substrate of 220 kDa OS=Homo sapiens OX=9606 GN=KIDINS220 PE=1 SV=3	0.000612077	1	K	VSQNSLGEMTK(0.99)LGSK(0.01)	3	0.71628	1	1	0	33327000	1.02036e+07	1.70762
sp|Q9UHP3|UBP25_HUMAN	520	>sp|Q9UHP3|UBP25_HUMAN Ubiquitin carboxyl-terminal hydrolase 25 OS=Homo sapiens OX=9606 GN=USP25 PE=1 SV=4	0.000512016	1	K	SVIHK(1)PFTQSR	3	1.0445	1.78622e+07	8.58754e+06	-1.05659	208290	63835.9	1.70615
sp|P05783|K1C18_HUMAN	426	>sp|P05783|K1C18_HUMAN Keratin, type I cytoskeletal 18 OS=Homo sapiens OX=9606 GN=KRT18 PE=1 SV=2	1.06896e-06	1	K	VVSETNDTK(1)VLRH	3	-0.23989	2.77313e+07	7.2534e+07	1.38714	317410	97443.3	1.70371
sp|P20700|LMNB1_HUMAN	79	>sp|P20700|LMNB1_HUMAN Lamin-B1 OS=Homo sapiens OX=9606 GN=LMNB1 PE=1 SV=2	0.000645083	1	K	ELTGLK(1)ALYETELADAR	3	0.87855	1	1	0	7543200	2.32262e+06	1.69943
sp|Q14118|DAG1_HUMAN	794	>sp|Q14118|DAG1_HUMAN Dystroglycan OS=Homo sapiens OX=9606 GN=DAG1 PE=1 SV=2	5.35748e-11	1	K	K(1)GVPIIFADELDDSKPPPSSSMPLILQEEK	4	-0.077268	1	1	0	19264000	5.93681e+06	1.69815
sp|P47755|CAZA2_HUMAN;sp|P52907|CAZA1_HUMAN	273;273	>sp|P47755|CAZA2_HUMAN F-actin-capping protein subunit alpha-2 OS=Homo sapiens OX=9606 GN=CAPZA2 PE=1 SV=3;>sp|P52907|CAZA1_HUMAN F-actin-capping protein subunit alpha-1 OS=Homo sapiens OX=9606 GN=CAPZA1 PE=1 SV=3	0.00457864	1	K	IDWNK(1)ILSYK	3	-0.17259	1.2529e+07	101806	-6.94331	997590	307588	1.69745
sp|Q96RU2|UBP28_HUMAN	542	>sp|Q96RU2|UBP28_HUMAN Ubiquitin carboxyl-terminal hydrolase 28 OS=Homo sapiens OX=9606 GN=USP28 PE=1 SV=1	0.00272496	1	K	TVTDEEINFVK(1)TCLQR	3	1.3694	1.41799e+06	756283	-0.906845	4564300	1.41085e+06	1.69383
sp|Q9Y295|DRG1_HUMAN	159	>sp|Q9Y295|DRG1_HUMAN Developmentally-regulated GTP-binding protein 1 OS=Homo sapiens OX=9606 GN=DRG1 PE=1 SV=1	0.000166392	1	K	K(1)IIENELEGFGIR	3	0.47623	1	1	0	8301800	2.5922e+06	1.67925
sp|Q9UI30|TR112_HUMAN	68	>sp|Q9UI30|TR112_HUMAN Multifunctional methyltransferase subunit TRM112-like protein OS=Homo sapiens OX=9606 GN=TRMT112 PE=1 SV=1	0.000288932	1	K	LIQVPK(1)GPVEGYEENEEFLR	3	1.5315	5.76792e+06	7.19948e+06	0.319843	30674000	9.57924e+06	1.67903
sp|P78527|PRKDC_HUMAN	3825	>sp|P78527|PRKDC_HUMAN DNA-dependent protein kinase catalytic subunit OS=Homo sapiens OX=9606 GN=PRKDC PE=1 SV=3	0.000357535	1	K	DLLLNTMSQEEK(1)AAYLSDPR	3	0.18235	1	4.30679e+06	22.0382	13615000	4.26554e+06	1.6744
sp|P35998|PRS7_HUMAN	46	>sp|P35998|PRS7_HUMAN 26S proteasome regulatory subunit 7 OS=Homo sapiens OX=9606 GN=PSMC2 PE=1 SV=3	0.001382	1	K	QIK(1)QVEDDIQQLLK	3	0.58437	2.76352e+06	1	-21.3981	4321500	1.37602e+06	1.65103
sp|Q9H0H5|RGAP1_HUMAN	292	>sp|Q9H0H5|RGAP1_HUMAN Rac GTPase-activating protein 1 OS=Homo sapiens OX=9606 GN=RACGAP1 PE=1 SV=1	7.15028e-25	1	K	LHDFVSK(1)TVIKPESCVPCGK	4	-1.3578	3.11151e+08	2.42891e+08	-0.357303	203590000	6.5091e+07	1.64514
sp|P19367|HXK1_HUMAN	885	>sp|P19367|HXK1_HUMAN Hexokinase-1 OS=Homo sapiens OX=9606 GN=HK1 PE=1 SV=3	5.89292e-07	1	K	ELSPK(1)CNVSFLLSEDGSGK	3	2.0667	1.12983e+07	1.96277e+07	0.796781	17727000	5.75815e+06	1.62227
sp|P17302|CXA1_HUMAN	303	>sp|P17302|CXA1_HUMAN Gap junction alpha-1 protein OS=Homo sapiens OX=9606 GN=GJA1 PE=1 SV=2	6.13625e-89	1	K	NYNK(1)QASEQNWANYSAEQNR	3	0.47847	1.62278e+08	8.56202e+07	-0.922442	51389000	1.67897e+07	1.61389
sp|P22234|PUR6_HUMAN	74	>sp|P22234|PUR6_HUMAN Multifunctional protein ADE2 OS=Homo sapiens OX=9606 GN=PAICS PE=1 SV=3	0.0014035	1	K	ITSCIFQLLQEAGIK(1)TAFTR	3	-2.0742	1	6.27212e+06	22.5805	882740	289136	1.61024
sp|Q96JK2|DCAF5_HUMAN	678	>sp|Q96JK2|DCAF5_HUMAN DDB1- and CUL4-associated factor 5 OS=Homo sapiens OX=9606 GN=DCAF5 PE=1 SV=2	2.16436e-09	1	K	YSYISYSNNK(1)DGETSLVTGEADEGR	3	1.231	2.33956e+07	1.26035e+07	-0.892413	47272000	1.56189e+07	1.59769
sp|P30050|RL12_HUMAN	83	>sp|P30050|RL12_HUMAN 60S ribosomal protein L12 OS=Homo sapiens OX=9606 GN=RPL12 PE=1 SV=1	1.68547e-06	1	K	QAQIEVVPSASALIIK(0.732)ALK(0.268)	3	-0.084132	1	1	0	1122700	372821	1.59042
sp|O14495|PLPP3_HUMAN	8	>sp|O14495|PLPP3_HUMAN Phospholipid phosphatase 3 OS=Homo sapiens OX=9606 GN=PLPP3 PE=1 SV=1	0.0180593	1	K	YDK(1)AIVPESK	2	0.7015	1.88198e+06	1	-20.8438	13519000	4.50348e+06	1.58588
sp|Q9UMX0|UBQL1_HUMAN	83	>sp|Q9UMX0|UBQL1_HUMAN Ubiquilin-1 OS=Homo sapiens OX=9606 GN=UBQLN1 PE=1 SV=2	6.84346e-05	1	K	SHTDQLVLIFAGK(0.958)ILK(0.042)	3	0.52207	1	395208	18.5923	1970500	660319	1.57733
sp|P08758|ANXA5_HUMAN	76	>sp|P08758|ANXA5_HUMAN Annexin A5 OS=Homo sapiens OX=9606 GN=ANXA5 PE=1 SV=2	5.82885e-48	1	K	SELTGK(0.999)FEK(0.001)	2	1.2371	1	1.4997e+06	20.5162	1978700	663081	1.5773
sp|Q14103|HNRPD_HUMAN	129	>sp|Q14103|HNRPD_HUMAN Heterogeneous nuclear ribonucleoprotein D0 OS=Homo sapiens OX=9606 GN=HNRNPD PE=1 SV=1	0.000122491	1	K	FGEVVDCTLK(1)LDPITGR	3	0.0064514	1	1	0	10810000	3.62275e+06	1.57721
sp|O14964|HGS_HUMAN	251	>sp|O14964|HGS_HUMAN Hepatocyte growth factor-regulated tyrosine kinase substrate OS=Homo sapiens OX=9606 GN=HGS PE=1 SV=1	3.88372e-35	1	K	ATSTTELPPEYLTSPLSQQSQLPPK(1)R	3	-0.14876	2.6842e+08	8.69178e+07	-1.62677	75668000	2.54222e+07	1.5736
sp|P98172|EFNB1_HUMAN	289	>sp|P98172|EFNB1_HUMAN Ephrin-B1 OS=Homo sapiens OX=9606 GN=EFNB1 PE=1 SV=1	1.21012e-29	1	K	AAALSLSTLASPK(1)GGSGTAGTEPSDIIIPLR	3	0.033593	1.93452e+07	8.16389e+06	-1.24465	21679000	7.29487e+06	1.57134
sp|Q9H0F6|SHRPN_HUMAN	189	>sp|Q9H0F6|SHRPN_HUMAN Sharpin OS=Homo sapiens OX=9606 GN=SHARPIN PE=1 SV=1	3.12815e-88	1	K	AIAGGDEK(1)GAAQVAAVLAQHR	3	-0.47069	2.07628e+09	6.27572e+08	-1.72615	347970000	1.17135e+08	1.57079
sp|Q07955|SRSF1_HUMAN	30	>sp|Q07955|SRSF1_HUMAN Serine/arginine-rich splicing factor 1 OS=Homo sapiens OX=9606 GN=SRSF1 PE=1 SV=2	0.000470335	1	K	TK(1)DIEDVFYK	3	-1.0187	2.84619e+07	2.4568e+07	-0.212251	750330	252902	1.56895
sp|O75955|FLOT1_HUMAN	211	>sp|O75955|FLOT1_HUMAN Flotillin-1 OS=Homo sapiens OX=9606 GN=FLOT1 PE=1 SV=3	0.000402724	1	K	VSAQYLSEIEMAK(1)AQR	3	-0.41339	1	1	0	8573100	2.90492e+06	1.56132
sp|O43707|ACTN4_HUMAN;sp|P12814|ACTN1_HUMAN	421;402	>sp|O43707|ACTN4_HUMAN Alpha-actinin-4 OS=Homo sapiens OX=9606 GN=ACTN4 PE=1 SV=2;>sp|P12814|ACTN1_HUMAN Alpha-actinin-1 OS=Homo sapiens OX=9606 GN=ACTN1 PE=1 SV=2	0.00299663	1	K	QK(1)ASIHEAWTDGK	2	0.60729	1	3.21406e+08	28.2598	1595100	546254	1.546
sp|O14562|UBFD1_HUMAN	305	>sp|O14562|UBFD1_HUMAN Ubiquitin domain-containing protein UBFD1 OS=Homo sapiens OX=9606 GN=UBFD1 PE=1 SV=2	2.0996e-06	1	K	DTVLGK(1)WQYF	2	0.55115	3.71914e+06	2.46092e+07	2.72615	14678000	5.0413e+06	1.54179
sp|Q96GF1|RN185_HUMAN	87	>sp|Q96GF1|RN185_HUMAN E3 ubiquitin-protein ligase RNF185 OS=Homo sapiens OX=9606 GN=RNF185 PE=1 SV=1	0.0265363	1	K	DK(1)VIPLYGR	2	1.7708	1	2.63421e+06	21.3289	71200000	2.486e+07	1.51805
sp|Q8NC42|RN149_HUMAN	288	>sp|Q8NC42|RN149_HUMAN E3 ubiquitin-protein ligase RNF149 OS=Homo sapiens OX=9606 GN=RNF149 PE=2 SV=2	0.00203319	1	K	ILPCK(1)HIFHR	3	0.62464	756956	2.48736e+06	1.71634	21102000	7.38139e+06	1.51542
sp|P08670|VIME_HUMAN	139	>sp|P08670|VIME_HUMAN Vimentin OS=Homo sapiens OX=9606 GN=VIM PE=1 SV=4	1.06218e-18	1;2	K	ILLAELEQLK(1)GQGK(1)SR	3	-1.5672	5.4713e+08	6.04965e+08	0.144966	459830000	1.61909e+08	1.50592
sp|Q96GG9|DCNL1_HUMAN	64	>sp|Q96GG9|DCNL1_HUMAN DCN1-like protein 1 OS=Homo sapiens OX=9606 GN=DCUN1D1 PE=1 SV=1	0.00391084	1	K	K(1)LEQLYNR	2	-1.8765	2.38148e+07	2.01206e+07	-0.243188	65128000	2.29451e+07	1.50509
sp|Q14103|HNRPD_HUMAN	158	>sp|Q14103|HNRPD_HUMAN Heterogeneous nuclear ribonucleoprotein D0 OS=Homo sapiens OX=9606 GN=HNRNPD PE=1 SV=1	0.00524191	1	K	ESESVDK(0.007)VMDQK(0.93)EHK(0.063)	3	-2.0821	1.75143e+06	1.77775e+07	3.34344	11368000	4.00623e+06	1.50466
sp|Q13637|RAB32_HUMAN	208	>sp|Q13637|RAB32_HUMAN Ras-related protein Rab-32 OS=Homo sapiens OX=9606 GN=RAB32 PE=1 SV=3	2.88867e-79	1	K	ILVNHQSFPNEENDVDK(0.95)IK(0.05)LDQETLR	5	0.23334	5.63562e+07	2.1412e+07	-1.39616	53784000	1.89735e+07	1.50319
sp|Q9HD42|CHM1A_HUMAN	55	>sp|Q9HD42|CHM1A_HUMAN Charged multivesicular body protein 1a OS=Homo sapiens OX=9606 GN=CHMP1A PE=1 SV=1	0.0392637	1	K	K(0.5)K(0.5)NEGVNWLR	3	2.1349	1.00483e+07	8.69744e+06	-0.208284	36839	13019.7	1.50054
sp|Q9HD42|CHM1A_HUMAN	56	>sp|Q9HD42|CHM1A_HUMAN Charged multivesicular body protein 1a OS=Homo sapiens OX=9606 GN=CHMP1A PE=1 SV=1	0.0370268	1	K	K(1)NEGVNWLR	2	2.4145	1.00483e+07	8.69744e+06	-0.208284	36839	13019.7	1.50054
sp|Q13501|SQSTM_HUMAN	435	>sp|Q13501|SQSTM_HUMAN Sequestosome-1 OS=Homo sapiens OX=9606 GN=SQSTM1 PE=1 SV=1	1.88098e-63	1	K	NYDIGAALDTIQYSK(1)HPPPL	3	0.25768	7.20222e+07	4.33694e+07	-0.731765	112670000	3.98606e+07	1.49907
sp|Q15040|JOS1_HUMAN	180	>sp|Q15040|JOS1_HUMAN Josephin-1 OS=Homo sapiens OX=9606 GN=JOSD1 PE=1 SV=1	5.24943e-20	1	K	GK(1)NCELLLVVPEEVEAHQSWR	3	0.7249	1.53618e+08	1.24111e+07	-3.62965	17690000	6.27483e+06	1.49529
sp|O43791|SPOP_HUMAN	110	>sp|O43791|SPOP_HUMAN Speckle-type POZ protein OS=Homo sapiens OX=9606 GN=SPOP PE=1 SV=1	0.000285008	1	K	FSILNAK(1)GEETK	3	-2.0237	2.09185e+07	1.7798e+07	-0.233063	40352000	1.43835e+07	1.48823
sp|P78368|KC1G2_HUMAN;sp|Q9HCP0|KC1G1_HUMAN;sp|Q9Y6M4|KC1G3_HUMAN	256;255;253	>sp|P78368|KC1G2_HUMAN Casein kinase I isoform gamma-2 OS=Homo sapiens OX=9606 GN=CSNK1G2 PE=1 SV=1;>sp|Q9HCP0|KC1G1_HUMAN Casein kinase I isoform gamma-1 OS=Homo sapiens OX=9606 GN=CSNK1G1 PE=1 SV=1;>sp|Q9Y6M4|KC1G3_HUMAN Casein kinase I isoform gamma-3 O	0.00428927	1	K	GSLPWQGLK(0.894)ADTLK(0.106)	3	1.4258	9.72589e+07	2.1166e+06	-5.52201	2970300	1.05883e+06	1.48814
sp|Q9Y666|S12A7_HUMAN	1002	>sp|Q9Y666|S12A7_HUMAN Solute carrier family 12 member 7 OS=Homo sapiens OX=9606 GN=SLC12A7 PE=1 SV=3	1.53218e-24	1	K	DTSLSGFK(1)DLFSMKPDQSNVR	3	-0.86017	455964	1	-18.7986	3891100	1.38726e+06	1.48794
sp|Q8N5J2|MINY1_HUMAN	255	>sp|Q8N5J2|MINY1_HUMAN Ubiquitin carboxyl-terminal hydrolase MINDY-1 OS=Homo sapiens OX=9606 GN=MINDY1 PE=1 SV=2	7.54471e-05	1	K	AVGK(1)LSYNQLVER	3	2.2488	1	5.81287e+06	22.4708	31943000	1.14475e+07	1.48047
sp|P68371|TBB4B_HUMAN	58	>sp|P68371|TBB4B_HUMAN Tubulin beta-4B chain OS=Homo sapiens OX=9606 GN=TUBB4B PE=1 SV=1	4.0762e-54	1	K	INVYYNEATGGK(1)YVPR	3	-0.35391	4.96846e+08	9.64095e+08	0.956376	46672000	1.68165e+07	1.47268
sp|P60510|PP4C_HUMAN	26	>sp|P60510|PP4C_HUMAN Serine/threonine-protein phosphatase 4 catalytic subunit OS=Homo sapiens OX=9606 GN=PPP4C PE=1 SV=1	0.000176283	1;2	K	ESEVK(1)ALCAK(1)AR	3	-1.4112	2.25602e+07	587379	-5.26335	6967000	2.51106e+06	1.47224
sp|P60510|PP4C_HUMAN	31	>sp|P60510|PP4C_HUMAN Serine/threonine-protein phosphatase 4 catalytic subunit OS=Homo sapiens OX=9606 GN=PPP4C PE=1 SV=1	0.0197834	2	K	ESEVK(1)ALCAK(1)AR	3	-1.4112	2.25602e+07	587379	-5.26335	6967000	2.51106e+06	1.47224
sp|P12268|IMDH2_HUMAN	206	>sp|P12268|IMDH2_HUMAN Inosine-5'-monophosphate dehydrogenase 2 OS=Homo sapiens OX=9606 GN=IMPDH2 PE=1 SV=2	4.89756e-20	1	K	K(0.911)GK(0.089)LPIVNEDDELVAIIAR	3	0.27187	3.07178e+07	2.7334e+06	-3.4903	23573000	8.49956e+06	1.47168
sp|P49447|CY561_HUMAN	240	>sp|P49447|CY561_HUMAN Cytochrome b561 OS=Homo sapiens OX=9606 GN=CYB561 PE=1 SV=2	6.29658e-66	1	K	RPSQAEEQALSMDFK(1)TLTEGDSPGSQ	3	-0.025905	1.59818e+06	1	-20.608	16313000	5.8839e+06	1.47118
sp|O15126|SCAM1_HUMAN	334	>sp|O15126|SCAM1_HUMAN Secretory carrier-associated membrane protein 1 OS=Homo sapiens OX=9606 GN=SCAMP1 PE=1 SV=2	7.79121e-292	1	K	TVQTAAANAASTAASSAAQNAFK(1)GNQI	3	0.0030551	2.26956e+09	4.05097e+07	-5.808	147090000	5.32115e+07	1.46689
sp|Q86YD1|PTOV1_HUMAN	176	>sp|Q86YD1|PTOV1_HUMAN Prostate tumor-overexpressed gene 1 protein OS=Homo sapiens OX=9606 GN=PTOV1 PE=1 SV=1	0.0131959	1	K	DCDSLK(1)GLCR	2	-0.4448	1.67939e+07	1.91337e+06	-3.13375	1317000	478870	1.45955
sp|P48681|NEST_HUMAN	259	>sp|P48681|NEST_HUMAN Nestin OS=Homo sapiens OX=9606 GN=NES PE=1 SV=2	4.74393e-06	1	K	ATEK(1)FQLAVEALEQEK	3	0.29129	1	1	0	8870400	3.22754e+06	1.45856
sp|P23528|COF1_HUMAN;sp|Q9Y281|COF2_HUMAN	112;112	>sp|P23528|COF1_HUMAN Cofilin-1 OS=Homo sapiens OX=9606 GN=CFL1 PE=1 SV=3;>sp|Q9Y281|COF2_HUMAN Cofilin-2 OS=Homo sapiens OX=9606 GN=CFL2 PE=1 SV=1	4.48353e-09	1	K	KEDLVFIFWAPESAPLK(0.845)SK(0.155)	3	0.11702	6.09727e+06	999596	-2.60875	5204800	1.89747e+06	1.45577
sp|Q8N257|H2B3B_HUMAN;sp|Q16778|H2B2E_HUMAN;sp|P33778|H2B1B_HUMAN;sp|P23527|H2B1O_HUMAN;sp|P06899|H2B1J_HUMAN;sp|Q99880|H2B1L_HUMAN;sp|Q99879|H2B1M_HUMAN;sp|Q99877|H2B1N_HUMAN;sp|Q93079|H2B1H_HUMAN;sp|Q5QNW6|H2B2F_HUMAN;sp|P62807|H2B1C_HUMAN;sp|P58876|H2B1D_HUMAN;sp|P57053|H2BFS_HUMAN;sp|O60814|H2B1K_HUMAN;sp|Q96A08|H2B1A_HUMAN	121;121;121;121;121;121;121;121;121;121;121;121;121;121;122	>sp|Q8N257|H2B3B_HUMAN Histone H2B type 3-B OS=Homo sapiens OX=9606 GN=HIST3H2BB PE=1 SV=3;>sp|Q16778|H2B2E_HUMAN Histone H2B type 2-E OS=Homo sapiens OX=9606 GN=HIST2H2BE PE=1 SV=3;>sp|P33778|H2B1B_HUMAN Histone H2B type 1-B OS=Homo sapiens OX=9606 GN=HIS	0.0166797	1	K	AVTK(1)YTSSK	2	0.65192	1.20676e+06	3.80513e+06	1.6568	5840100	2.14041e+06	1.44811
sp|P08708|RS17_HUMAN	107	>sp|P08708|RS17_HUMAN 40S ribosomal protein S17 OS=Homo sapiens OX=9606 GN=RPS17 PE=1 SV=2	6.92986e-131	1	K	EMLK(1)LLDFGSLSNLQVTQPTVGMNFK	3	0.60795	1.14248e+07	2.81531e+06	-2.0208	14511000	5.3308e+06	1.44472
sp|P52209|6PGD_HUMAN	48	>sp|P52209|6PGD_HUMAN 6-phosphogluconate dehydrogenase, decarboxylating OS=Homo sapiens OX=9606 GN=PGD PE=1 SV=3	0.00983806	1	K	VDDFLANEAK(0.921)GTK(0.079)	3	1.8459	1.41959e+07	1.44444e+07	0.0250433	3246200	1.19336e+06	1.44372
sp|Q13492|PICAL_HUMAN	318	>sp|Q13492|PICAL_HUMAN Phosphatidylinositol-binding clathrin assembly protein OS=Homo sapiens OX=9606 GN=PICALM PE=1 SV=2	1.02695e-250	1	K	ATTLSNAVSSLASTGLSLTK(1)VDER	3	0.88165	4.29082e+07	2.71776e+07	-0.658836	29449000	1.08696e+07	1.43792
sp|Q6ZVM7|TM1L2_HUMAN	400	>sp|Q6ZVM7|TM1L2_HUMAN TOM1-like protein 2 OS=Homo sapiens OX=9606 GN=TOM1L2 PE=1 SV=1	2.04056e-64	1	K	K(1)TVTYEDPQAVGGLASALDNR	3	1.2718	5.13598e+07	4.44097e+07	-0.209764	20915000	7.73175e+06	1.43567
sp|P11362|FGFR1_HUMAN	416	>sp|P11362|FGFR1_HUMAN Fibroblast growth factor receptor 1 OS=Homo sapiens OX=9606 GN=FGFR1 PE=1 SV=3	0.000200703	1	K	SDFHSQMAVHK(0.992)LAK(0.008)	3	-0.20615	4.52951e+06	164912	-4.77959	77018	28517.6	1.43334
sp|P52272|HNRPM_HUMAN	685	>sp|P52272|HNRPM_HUMAN Heterogeneous nuclear ribonucleoprotein M OS=Homo sapiens OX=9606 GN=HNRNPM PE=1 SV=3	0.000764043	1	K	DKFNECGHVLYADIK(0.974)MENGK(0.026)	4	-0.73243	1	6.11839e+06	22.5447	15816000	5.86215e+06	1.43188
sp|P17302|CXA1_HUMAN	346	>sp|P17302|CXA1_HUMAN Gap junction alpha-1 protein OS=Homo sapiens OX=9606 GN=GJA1 PE=1 SV=2	9.07426e-10	1	K	K(1)LAAGHELQPLAIVDQRPSSR	4	-0.76266	7.22245e+07	3.84218e+07	-0.910563	28955000	1.07535e+07	1.42901
sp|P17302|CXA1_HUMAN	345	>sp|P17302|CXA1_HUMAN Gap junction alpha-1 protein OS=Homo sapiens OX=9606 GN=GJA1 PE=1 SV=2	9.07426e-10	1	K	MGQAGSTISNSHAQPFDFPDDNQNSK(0.5)K(0.5)	4	-1.4046	7.22245e+07	3.84218e+07	-0.910563	28955000	1.07535e+07	1.42901
sp|P54709|AT1B3_HUMAN	7	>sp|P54709|AT1B3_HUMAN Sodium/potassium-transporting ATPase subunit beta-3 OS=Homo sapiens OX=9606 GN=ATP1B3 PE=1 SV=1	0.000339538	1	K	K(1)SLNQSLAEWK	3	-0.033643	1.76148e+06	1	-20.7484	60485000	2.26151e+07	1.41929
sp|P33121|ACSL1_HUMAN	216	>sp|P33121|ACSL1_HUMAN Long-chain-fatty-acid--CoA ligase 1 OS=Homo sapiens OX=9606 GN=ACSL1 PE=1 SV=1	2.16775e-06	1	K	LLLEGVENK(1)LIPGLK	3	0.24577	1	1	0	8919300	3.33606e+06	1.41879
sp|P61224|RAP1B_HUMAN;sp|P62834|RAP1A_HUMAN;sp|A6NIZ1|RP1BL_HUMAN	31;31;31	>sp|P61224|RAP1B_HUMAN Ras-related protein Rap-1b OS=Homo sapiens OX=9606 GN=RAP1B PE=1 SV=1;>sp|P62834|RAP1A_HUMAN Ras-related protein Rap-1A OS=Homo sapiens OX=9606 GN=RAP1A PE=1 SV=1;>sp|A6NIZ1|RP1BL_HUMAN Ras-related protein Rap-1b-like protein OS=Homo	9.86729e-25	1	K	SALTVQFVQGIFVEK(1)YDPTIEDSYR	3	-0.16959	6.36521e+06	4.48522e+06	-0.505031	5222400	1.96896e+06	1.40728
sp|P52569|CTR2_HUMAN	461	>sp|P52569|CTR2_HUMAN Cationic amino acid transporter 2 OS=Homo sapiens OX=9606 GN=SLC7A2 PE=1 SV=2	1.66095e-18	1	K	VTSK(1)SESQVTMLQR	2	-0.8339	2.95214e+06	798092	-1.88713	126700000	4.78895e+07	1.40364
sp|Q15041|AR6P1_HUMAN	114	>sp|Q15041|AR6P1_HUMAN ADP-ribosylation factor-like protein 6-interacting protein 1 OS=Homo sapiens OX=9606 GN=ARL6IP1 PE=1 SV=2	7.83386e-07	1	K	FHEICSNLVK(1)TR	3	0.35545	2.80034e+07	3.57793e+07	0.353519	427860	161774	1.40316
sp|O75886|STAM2_HUMAN	57	>sp|O75886|STAM2_HUMAN Signal transducing adapter molecule 2 OS=Homo sapiens OX=9606 GN=STAM2 PE=1 SV=1	6.17371e-17	1	K	VNHK(1)VPHVALQALTLLGACVANCGK	4	0.15984	8.67902e+06	6.55552e+06	-0.404822	8790400	3.32372e+06	1.40313
sp|P12956|XRCC6_HUMAN	317	>sp|P12956|XRCC6_HUMAN X-ray repair cross-complementing protein 6 OS=Homo sapiens OX=9606 GN=XRCC6 PE=1 SV=2	0.000874032	1	K	TFNTSTGGLLLPSDTK(1)R	3	0.18679	1	1.58141e+07	23.9147	1405600	532713	1.39975
sp|P50851|LRBA_HUMAN;sp|Q8NFP9|NBEA_HUMAN	2279;2353	>sp|P50851|LRBA_HUMAN Lipopolysaccharide-responsive and beige-like anchor protein OS=Homo sapiens OX=9606 GN=LRBA PE=1 SV=4;>sp|Q8NFP9|NBEA_HUMAN Neurobeachin OS=Homo sapiens OX=9606 GN=NBEA PE=1 SV=3	4.71924e-20	1	K	DLSKPIGALNPK(1)R	3	-0.11254	2.24322e+08	7.41311e+07	-1.59742	367960000	1.39875e+08	1.39541
sp|O94805|ACL6B_HUMAN;sp|O96019|ACL6A_HUMAN	418;421	>sp|O94805|ACL6B_HUMAN Actin-like protein 6B OS=Homo sapiens OX=9606 GN=ACTL6B PE=1 SV=1;>sp|O96019|ACL6A_HUMAN Actin-like protein 6A OS=Homo sapiens OX=9606 GN=ACTL6A PE=1 SV=1	0.00113038	1	K	QEYEEGGK(1)QCVER	3	0.28098	1	7.50716e+06	22.8398	1907800	731308	1.38336
sp|Q9UHI5|LAT2_HUMAN	14	>sp|Q9UHI5|LAT2_HUMAN Large neutral amino acids transporter small subunit 2 OS=Homo sapiens OX=9606 GN=SLC7A8 PE=1 SV=1	1.30631e-59	1;2	K	NNTEK(1)K(1)HPGGGESDASPEAGSGGGGVALKK	5	0.50264	1	387470	18.5637	900400000	3.45741e+08	1.38088
sp|Q7Z3T8|ZFY16_HUMAN	83	>sp|Q7Z3T8|ZFY16_HUMAN Zinc finger FYVE domain-containing protein 16 OS=Homo sapiens OX=9606 GN=ZFYVE16 PE=1 SV=3	1.41175e-44	1	K	DQECVNSCASSETSYGTNESSLNEK(0.772)TLK(0.228)	3	0.26135	5.50711e+06	4.36986e+06	-0.333706	26441000	1.01696e+07	1.37851
sp|Q9Y6A9|SPCS1_HUMAN	15	>sp|Q9Y6A9|SPCS1_HUMAN Signal peptidase complex subunit 1 OS=Homo sapiens OX=9606 GN=SPCS1 PE=1 SV=4	5.56944e-06	1	K	MLEHLSSLPTQMDYK(0.861)GQK(0.139)	4	-1.2394	4.10177e+06	5.5659e+06	0.44037	13487000	5.2119e+06	1.37169
sp|P33121|ACSL1_HUMAN	263	>sp|P33121|ACSL1_HUMAN Long-chain-fatty-acid--CoA ligase 1 OS=Homo sapiens OX=9606 GN=ACSL1 PE=1 SV=1	3.30302e-22	1	K	K(0.129)PK(0.871)PPAPEDLAVICFTSGTTGNPK	4	0.091089	1	1	0	85962000	3.32457e+07	1.37053
sp|Q14693|LPIN1_HUMAN	569	>sp|Q14693|LPIN1_HUMAN Phosphatidate phosphatase LPIN1 OS=Homo sapiens OX=9606 GN=LPIN1 PE=1 SV=2	0.00266505	1	K	NTTIK(0.049)EESK(0.95)PEQCLAGK(0.001)	3	0.85401	1	4.81574e+06	22.1993	9522000	3.68544e+06	1.36943
sp|Q8N5K1|CISD2_HUMAN	81	>sp|Q8N5K1|CISD2_HUMAN CDGSH iron-sulfur domain-containing protein 2 OS=Homo sapiens OX=9606 GN=CISD2 PE=1 SV=1	0.00141548	1	K	ENPK(0.997)VVNEINIEDLCLTK(0.003)	3	-1.4421	1.82784e+06	1.62771e+06	-0.167295	5232900	2.02823e+06	1.36739
sp|P07437|TBB5_HUMAN	297	>sp|P07437|TBB5_HUMAN Tubulin beta chain OS=Homo sapiens OX=9606 GN=TUBB PE=1 SV=2	1.21556e-46	1	K	ALTVPELTQQVFDAK(1)NMMAACDPR	3	-0.020191	1.24273e+09	4.21386e+08	-1.56029	46250000	1.79799e+07	1.36307
sp|P23246|SFPQ_HUMAN	466	>sp|P23246|SFPQ_HUMAN Splicing factor, proline- and glutamine-rich OS=Homo sapiens OX=9606 GN=SFPQ PE=1 SV=2	4.22705e-17	1	K	LAQK(1)NPMYQK	2	-0.55449	1	1	0	6998400	2.732e+06	1.35707
sp|Q9UNZ2|NSF1C_HUMAN	112	>sp|Q9UNZ2|NSF1C_HUMAN NSFL1 cofactor p47 OS=Homo sapiens OX=9606 GN=NSFL1C PE=1 SV=2	0.000705529	1	K	K(0.5)K(0.5)SPNELVDDLFK	3	1.4405	1.39568e+07	1.99106e+07	0.512576	39973000	1.56458e+07	1.35325
sp|Q9UNZ2|NSF1C_HUMAN	113	>sp|Q9UNZ2|NSF1C_HUMAN NSFL1 cofactor p47 OS=Homo sapiens OX=9606 GN=NSFL1C PE=1 SV=2	0.000705529	1	K	K(0.5)K(0.5)SPNELVDDLFK	3	1.4405	1.39568e+07	1.99106e+07	0.512576	39973000	1.56458e+07	1.35325
sp|P61421|VA0D1_HUMAN	343	>sp|P61421|VA0D1_HUMAN V-type proton ATPase subunit d 1 OS=Homo sapiens OX=9606 GN=ATP6V0D1 PE=1 SV=1	0.000268351	1	K	AK(1)IDNYIPIF	2	-0.079942	3.0971e+06	1.19223e+07	1.94467	88853000	3.49199e+07	1.34737
sp|Q9UP95|S12A4_HUMAN	85	>sp|Q9UP95|S12A4_HUMAN Solute carrier family 12 member 4 OS=Homo sapiens OX=9606 GN=SLC12A4 PE=1 SV=2	1.00507e-06	1	K	VSSLLGK(1)LVSYTNLTQGAK	3	0.37929	2.73136e+06	4.5128e+06	0.724403	1178500	464902	1.34195
sp|Q86WA9|S2611_HUMAN	578	>sp|Q86WA9|S2611_HUMAN Sodium-independent sulfate anion transporter OS=Homo sapiens OX=9606 GN=SLC26A11 PE=2 SV=2	5.68192e-18	1	K	GFQYFSTLEEAEK(1)HLR	4	0.57576	6.22113e+07	4.67456e+06	-3.73427	52501000	2.0809e+07	1.33514
sp|Q9NR09|BIRC6_HUMAN	2260	>sp|Q9NR09|BIRC6_HUMAN Baculoviral IAP repeat-containing protein 6 OS=Homo sapiens OX=9606 GN=BIRC6 PE=1 SV=2	0.0121585	1	K	ALVEQMEK(0.216)EK(0.784)	3	0.32605	7.46681e+06	1.31736e+07	0.819086	5500600	2.18673e+06	1.33082
sp|Q9BW27|NUP85_HUMAN	44	>sp|Q9BW27|NUP85_HUMAN Nuclear pore complex protein Nup85 OS=Homo sapiens OX=9606 GN=NUP85 PE=1 SV=1	0.000613505	1	K	EK(1)SEMVPSCPFIYIIR	3	-0.0033607	7.6432e+06	1	-22.8657	2325500	925197	1.32971
sp|P06733|ENOA_HUMAN	120	>sp|P06733|ENOA_HUMAN Alpha-enolase OS=Homo sapiens OX=9606 GN=ENO1 PE=1 SV=2	8.19554e-05	1	K	FGANAILGVSLAVCK(0.949)AGAVEK(0.051)	3	-0.6518	2.91168e+06	3.09109e+06	0.0862638	2158700	860625	1.32671
sp|Q9UMX0|UBQL1_HUMAN	70	>sp|Q9UMX0|UBQL1_HUMAN Ubiquilin-1 OS=Homo sapiens OX=9606 GN=UBQLN1 PE=1 SV=2	0.000115321	1	K	FK(1)SHTDQLVLIFAGK	3	-1.3382	2.38526e+07	5.22159e+07	1.13034	57795000	2.30636e+07	1.32532
sp|P50148|GNAQ_HUMAN	16	>sp|P50148|GNAQ_HUMAN Guanine nucleotide-binding protein G(q) subunit alpha OS=Homo sapiens OX=9606 GN=GNAQ PE=1 SV=4	1.23143e-14	1	K	TLESIMACCLSEEAK(1)EAR	3	-1.7728	5.70766e+06	6.21553e+06	0.122977	21390000	8.58193e+06	1.31756
sp|P62826|RAN_HUMAN	159	>sp|P62826|RAN_HUMAN GTP-binding nuclear protein Ran OS=Homo sapiens OX=9606 GN=RAN PE=1 SV=3	5.55261e-05	1	K	SNYNFEK(1)PFLWLAR	3	-0.10007	1	1.92737e+06	20.8782	3413600	1.37126e+06	1.3158
sp|Q9P289|STK26_HUMAN;sp|Q9Y6E0|STK24_HUMAN	280;292	>sp|Q9P289|STK26_HUMAN Serine/threonine-protein kinase 26 OS=Homo sapiens OX=9606 GN=STK26 PE=1 SV=2;>sp|Q9Y6E0|STK24_HUMAN Serine/threonine-protein kinase 24 OS=Homo sapiens OX=9606 GN=STK24 PE=1 SV=1	0.000990347	1	K	K(1)TSYLTELIDR	3	0.56113	1	1	0	6870800	2.7617e+06	1.31492
sp|Q15758|AAAT_HUMAN	522	>sp|Q15758|AAAT_HUMAN Neutral amino acid transporter B(0) OS=Homo sapiens OX=9606 GN=SLC1A5 PE=1 SV=2	5.1776e-114	1;2	K	STEPELIQVK(1)SELPLDPLPVPTEEGNPLLK(1)HYR	5	0.99031	9.80885e+07	7.45622e+06	-3.71757	4936400	1.99279e+06	1.30867
sp|O43567|RNF13_HUMAN	232	>sp|O43567|RNF13_HUMAN E3 ubiquitin-protein ligase RNF13 OS=Homo sapiens OX=9606 GN=RNF13 PE=1 SV=1	7.67324e-15	1	K	FK(0.549)K(0.451)GDEYDVCAICLDEYEDGDKLR	4	-1.5434	1.3511e+07	1.66136e+07	0.298238	58789000	2.38616e+07	1.30085
sp|O60488|ACSL4_HUMAN	354	>sp|O60488|ACSL4_HUMAN Long-chain-fatty-acid--CoA ligase 4 OS=Homo sapiens OX=9606 GN=ACSL4 PE=1 SV=2	9.80413e-06	1	K	IGYSSPLTLSDQSSK(0.938)IK(0.062)	3	0.0021733	6.2661e+07	4.99109e+07	-0.328214	14592000	5.92508e+06	1.30027
sp|O43813|LANC1_HUMAN	128	>sp|O43813|LANC1_HUMAN LanC-like protein 1 OS=Homo sapiens OX=9606 GN=LANCL1 PE=1 SV=1	7.78866e-19	1	K	MNNEK(1)QAEDCITR	2	-1.5615	4.10657e+06	4.30473e+06	0.0679877	6526600	2.65098e+06	1.29981
sp|Q02878|RL6_HUMAN	210	>sp|Q02878|RL6_HUMAN 60S ribosomal protein L6 OS=Homo sapiens OX=9606 GN=RPL6 PE=1 SV=3	0.00402619	1	K	IPK(1)HLTDAYFK	3	0.3762	1	1	0	21286000	8.66527e+06	1.29659
sp|P53794|SC5A3_HUMAN	596	>sp|P53794|SC5A3_HUMAN Sodium/myo-inositol cotransporter OS=Homo sapiens OX=9606 GN=SLC5A3 PE=1 SV=2	2.15864e-52	1	K	SEDSIK(1)GLQPEDVNLLVTCR	3	1.6339	1.64854e+07	6.60656e+06	-1.31922	17509000	7.13661e+06	1.29478
sp|P52209|6PGD_HUMAN	59	>sp|P52209|6PGD_HUMAN 6-phosphogluconate dehydrogenase, decarboxylating OS=Homo sapiens OX=9606 GN=PGD PE=1 SV=3	2.93024e-05	1	K	VVGAQSLK(1)EMVSK	3	-0.25913	2.62963e+07	3.31882e+07	0.335812	27409000	1.11808e+07	1.29362
sp|Q13049|TRI32_HUMAN	204	>sp|Q13049|TRI32_HUMAN E3 ubiquitin-protein ligase TRIM32 OS=Homo sapiens OX=9606 GN=TRIM32 PE=1 SV=2	4.02872e-13	1	K	K(1)FFTGSLAEVEK	3	-0.27104	3.09608e+07	2.49827e+07	-0.309514	69003000	2.82194e+07	1.28997
sp|P0DP25|CALM3_HUMAN;sp|P0DP24|CALM2_HUMAN;sp|P0DP23|CALM1_HUMAN	31;31;31	>sp|P0DP25|CALM3_HUMAN Calmodulin-3 OS=Homo sapiens OX=9606 GN=CALM3 PE=1 SV=1;>sp|P0DP24|CALM2_HUMAN Calmodulin-2 OS=Homo sapiens OX=9606 GN=CALM2 PE=1 SV=1;>sp|P0DP23|CALM1_HUMAN Calmodulin-1 OS=Homo sapiens OX=9606 GN=CALM1 PE=1 SV=1	3.65022e-38	1	K	EAFSLFDKDGDGTITTK(1)ELGTVMR	3	-1.401	1.07768e+07	3.18875e+07	1.56506	20297000	8.32102e+06	1.28643
sp|Q8N3V7|SYNPO_HUMAN	630	>sp|Q8N3V7|SYNPO_HUMAN Synaptopodin OS=Homo sapiens OX=9606 GN=SYNPO PE=1 SV=2	0.0229818	1	K	SMFTFVEK(0.905)PK(0.095)	3	-1.2326	1	8.36012e+06	22.9951	2970800	1.22204e+06	1.28156
sp|P10599|THIO_HUMAN	96	>sp|P10599|THIO_HUMAN Thioredoxin OS=Homo sapiens OX=9606 GN=TXN PE=1 SV=3	6.19664e-06	1	K	EK(1)LEATINELV	2	-0.2123	1.24919e+07	4.78909e+06	-1.38317	6651100	2.74471e+06	1.27694
sp|Q9UNK0|STX8_HUMAN	146	>sp|Q9UNK0|STX8_HUMAN Syntaxin-8 OS=Homo sapiens OX=9606 GN=STX8 PE=1 SV=2	3.38664e-94	1	K	QQQQK(1)IIQEQDAGLDALSSIISR	3	1.0525	1.10932e+06	1	-20.0812	23356000	9.65488e+06	1.27446
sp|O60831|PRAF2_HUMAN	152	>sp|O60831|PRAF2_HUMAN PRA1 family protein 2 OS=Homo sapiens OX=9606 GN=PRAF2 PE=1 SV=1	0.0010456	1	K	IENK(1)IESIGLK	3	-0.70297	1.88286e+07	2.27549e+07	0.273251	6562700	2.71526e+06	1.2732
sp|O14964|HGS_HUMAN	192	>sp|O14964|HGS_HUMAN Hepatocyte growth factor-regulated tyrosine kinase substrate OS=Homo sapiens OX=9606 GN=HGS PE=1 SV=1	0.000194683	1	K	ACGQIFCGK(0.913)CSSK(0.087)	3	-1.1016	2.84808e+07	2.37427e+07	-0.262505	40219000	1.66821e+07	1.26957
sp|P52569|CTR2_HUMAN	449	>sp|P52569|CTR2_HUMAN Cationic amino acid transporter 2 OS=Homo sapiens OX=9606 GN=SLC7A2 PE=1 SV=2	7.01804e-05	1	K	CSPEK(1)DGLGSSPR	3	0.22537	1	1	0	72879000	3.02603e+07	1.26808
sp|Q9Y2J2|E41L3_HUMAN	398	>sp|Q9Y2J2|E41L3_HUMAN Band 4.1-like protein 3 OS=Homo sapiens OX=9606 GN=EPB41L3 PE=1 SV=2	0.0212004	1	K	LLLPEAPPK(0.426)K(0.574)	2	0.87657	1	1	0	4727200	1.97702e+06	1.25766
sp|Q96ER3|SAAL1_HUMAN	209	>sp|Q96ER3|SAAL1_HUMAN Protein SAAL1 OS=Homo sapiens OX=9606 GN=SAAL1 PE=1 SV=2	7.98195e-16	1	K	VGEVVDK(1)LFDLDEK	3	0.003471	4.76019e+07	4.0095e+07	-0.247598	60081000	2.51607e+07	1.25574
sp|Q14254|FLOT2_HUMAN	223	>sp|Q14254|FLOT2_HUMAN Flotillin-2 OS=Homo sapiens OX=9606 GN=FLOT2 PE=1 SV=2	0.00054121	1	K	AFELQK(1)SAFSEEVNIK	3	2.3793	1	1	0	41133000	1.72553e+07	1.25326
sp|P39023|RL3_HUMAN;sp|Q92901|RL3L_HUMAN	373;373	>sp|P39023|RL3_HUMAN 60S ribosomal protein L3 OS=Homo sapiens OX=9606 GN=RPL3 PE=1 SV=2;>sp|Q92901|RL3L_HUMAN 60S ribosomal protein L3-like OS=Homo sapiens OX=9606 GN=RPL3L PE=2 SV=3	0.000248137	1	K	FIDTTSK(1)FGHGR	3	0.46843	2.53852e+07	1.92768e+07	-0.397124	555610	233264	1.25211
sp|Q9NXU5|ARL15_HUMAN	157	>sp|Q9NXU5|ARL15_HUMAN ADP-ribosylation factor-like protein 15 OS=Homo sapiens OX=9606 GN=ARL15 PE=1 SV=1	3.19631e-06	1	K	K(1)YFELEPLAR	3	-0.069054	2.76556e+07	3.02421e+07	0.128985	88628000	3.72125e+07	1.25198
sp|P05023|AT1A1_HUMAN	413	>sp|P05023|AT1A1_HUMAN Sodium/potassium-transporting ATPase subunit alpha-1 OS=Homo sapiens OX=9606 GN=ATP1A1 PE=1 SV=1	1.85235e-31	1	K	MTVAHMWFDNQIHEADTTENQSGVSFDK(1)TSATWLALSR	5	0.29673	1	1	0	5443100	2.29292e+06	1.24724
sp|P63104|1433Z_HUMAN	139	>sp|P63104|1433Z_HUMAN 14-3-3 protein zeta/delta OS=Homo sapiens OX=9606 GN=YWHAZ PE=1 SV=1	1.06667e-87	1	K	K(1)GIVDQSQQAYQEAFEISKK	3	0.092063	1.32232e+08	8.57879e+07	-0.624228	117310000	4.95624e+07	1.24301
sp|Q96RL1|UIMC1_HUMAN	20	>sp|Q96RL1|UIMC1_HUMAN BRCA1-A complex subunit RAP80 OS=Homo sapiens OX=9606 GN=UIMC1 PE=1 SV=2	0.0046432	1	K	K(1)DVETTSSVSVK	2	-0.31982	5.77039e+06	7.93709e+06	0.459941	4292400	1.81376e+06	1.2428
sp|O14964|HGS_HUMAN	202	>sp|O14964|HGS_HUMAN Hepatocyte growth factor-regulated tyrosine kinase substrate OS=Homo sapiens OX=9606 GN=HGS PE=1 SV=1	0.00402619	1	K	YSTIPK(1)FGIEK	3	-0.857	2.0233e+07	1	-24.2702	50209000	2.1244e+07	1.24089
sp|Q96RL1|UIMC1_HUMAN	607	>sp|Q96RL1|UIMC1_HUMAN BRCA1-A complex subunit RAP80 OS=Homo sapiens OX=9606 GN=UIMC1 PE=1 SV=2	0.00979709	1	K	ACSTVEGK(1)WQQR	3	0.31192	1	1	0	6111600	2.58756e+06	1.23996
sp|P62258|1433E_HUMAN	50	>sp|P62258|1433E_HUMAN 14-3-3 protein epsilon OS=Homo sapiens OX=9606 GN=YWHAE PE=1 SV=1	1.51621e-19	1	K	NLLSVAYK(1)NVIGAR	3	-0.11358	3.11195e+08	3.11847e+07	-3.31891	147990000	6.28962e+07	1.23446
sp|P49915|GUAA_HUMAN	457	>sp|P49915|GUAA_HUMAN GMP synthase [glutamine-hydrolyzing] OS=Homo sapiens OX=9606 GN=GMPS PE=1 SV=1	1.48075e-32	1	K	VICAEEPYICK(1)DFPETNNILK	3	-0.33202	3.50636e+07	3.04077e+07	-0.205536	25931000	1.10683e+07	1.22824
sp|Q15233|NONO_HUMAN	99	>sp|Q15233|NONO_HUMAN Non-POU domain-containing octamer-binding protein OS=Homo sapiens OX=9606 GN=NONO PE=1 SV=4	0.00346825	1	K	YGK(1)AGEVFIHK	3	-0.34023	1	2.04879e+06	20.9663	19948000	8.5493e+06	1.22237
sp|Q96J01|THOC3_HUMAN	86	>sp|Q96J01|THOC3_HUMAN THO complex subunit 3 OS=Homo sapiens OX=9606 GN=THOC3 PE=1 SV=1	0.00738678	1	K	TASVFLLEK(1)DR	3	0.088188	1	1	0	6826700	2.95661e+06	1.20724
sp|Q8TAQ2|SMRC2_HUMAN	874	>sp|Q8TAQ2|SMRC2_HUMAN SWI/SNF complex subunit SMARCC2 OS=Homo sapiens OX=9606 GN=SMARCC2 PE=1 SV=1	7.95883e-22	1	K	DIGEGNLSTAAAAALAAAAVK(0.439)AK(0.561)	3	0.78604	1.19324e+06	614895	-0.956476	3541200	1.5421e+06	1.19934
sp|Q9BSR8|YIPF4_HUMAN	47	>sp|Q9BSR8|YIPF4_HUMAN Protein YIPF4 OS=Homo sapiens OX=9606 GN=YIPF4 PE=1 SV=1	3.13777e-09	1	K	LNLGGDFIK(1)ESTATTFLR	3	-0.14055	555179	1	-19.0826	969290	422705	1.19728
sp|Q05086|UBE3A_HUMAN	123	>sp|Q05086|UBE3A_HUMAN Ubiquitin-protein ligase E3A OS=Homo sapiens OX=9606 GN=UBE3A PE=1 SV=4	9.83827e-05	1	K	IDFK(1)DVTYLTEEK	3	-0.40779	2.03364e+07	1.581e+07	-0.363228	7912600	3.47012e+06	1.18917
sp|P33121|ACSL1_HUMAN	419	>sp|P33121|ACSL1_HUMAN Long-chain-fatty-acid--CoA ligase 1 OS=Homo sapiens OX=9606 GN=ACSL1 PE=1 SV=1	1.28779e-20	1	K	LIFHK(1)VQSSLGGR	3	0.64692	1	1	0	95701000	4.20273e+07	1.18721
sp|P32189|GLPK_HUMAN;sp|Q14409|GLPK3_HUMAN	313;307	>sp|P32189|GLPK_HUMAN Glycerol kinase OS=Homo sapiens OX=9606 GN=GK PE=1 SV=3;>sp|Q14409|GLPK3_HUMAN Glycerol kinase 3 OS=Homo sapiens OX=9606 GN=GK3P PE=2 SV=2	2.33308e-05	1	K	CVFSDHGLLTTVAYK(1)LGR	3	-1.1061	1.42765e+06	1.16867e+06	-0.288781	3406100	1.49761e+06	1.18545
sp|Q6NUM9|RETST_HUMAN	193	>sp|Q6NUM9|RETST_HUMAN All-trans-retinol 13,14-reductase OS=Homo sapiens OX=9606 GN=RETSAT PE=1 SV=2	0.000301558		K	EKFPQEEAIIDK(0.982)YIK(0.018)	3	1.8031	1	1	0	6591700	2.89869e+06	1.18525
sp|P15104|GLNA_HUMAN	95	>sp|P15104|GLNA_HUMAN Glutamine synthetase OS=Homo sapiens OX=9606 GN=GLUL PE=1 SV=4	0.00213253	1	K	K(0.075)DPNK(0.925)LVLCEVFK	3	-0.19624	1	1	0	42333000	1.87266e+07	1.17669
sp|Q16655|MAR1_HUMAN	106	>sp|Q16655|MAR1_HUMAN Melanoma antigen recognized by T-cells 1 OS=Homo sapiens OX=9606 GN=MLANA PE=1 SV=1	1.74644e-43	1;2;3	K	VSLQEK(1)NCEPVVPNAPPAYEK(1)LSAEQSPPPYSP	4	0.57569	1	1	0	254910000	1.1296e+08	1.17418
sp|P55082|MFAP3_HUMAN;sp|O75121|MFA3L_HUMAN	219;221	>sp|P55082|MFAP3_HUMAN Microfibril-associated glycoprotein 3 OS=Homo sapiens OX=9606 GN=MFAP3 PE=2 SV=1;>sp|O75121|MFA3L_HUMAN Microfibrillar-associated protein 3-like OS=Homo sapiens OX=9606 GN=MFAP3L PE=1 SV=3	0.00709992	1	K	TLELAK(0.999)VTQFK(0.001)	3	-0.62637	1	3.33127e+06	21.6676	13855000	6.15201e+06	1.17128
sp|Q9Y287|ITM2B_HUMAN	39	>sp|Q9Y287|ITM2B_HUMAN Integral membrane protein 2B OS=Homo sapiens OX=9606 GN=ITM2B PE=1 SV=1	7.13213e-48	1	K	SGEEALIIPPDAVAVDCK(1)DPDDVVPVGQRR	4	0.42311	2.84444e+07	3.78836e+07	0.413428	80299000	3.56617e+07	1.17101
sp|Q01650|LAT1_HUMAN	19	>sp|Q01650|LAT1_HUMAN Large neutral amino acids transporter small subunit 1 OS=Homo sapiens OX=9606 GN=SLC7A5 PE=1 SV=2	3.20238e-38	1	K	RALAAPAAEEK(1)EEAREK	3	-0.49957	3.69163e+09	1.86552e+09	-0.98468	6857700000	3.05511e+09	1.1665
sp|Q9NZM1|MYOF_HUMAN	1416	>sp|Q9NZM1|MYOF_HUMAN Myoferlin OS=Homo sapiens OX=9606 GN=MYOF PE=1 SV=1	2.10969e-05	1	K	EDIVPQLK(1)ASLLSAPPCR	3	0.029361	1.47447e+07	2.89156e+06	-2.35027	1310400	584247	1.16536
sp|P33121|ACSL1_HUMAN	356	>sp|P33121|ACSL1_HUMAN Long-chain-fatty-acid--CoA ligase 1 OS=Homo sapiens OX=9606 GN=ACSL1 PE=1 SV=1	3.06482e-09	1	K	LLMDDLK(1)VLQPTVFPVVPR	3	1.7707	1	1	0	1704400	763582	1.15841
sp|P30876|RPB2_HUMAN	821	>sp|P30876|RPB2_HUMAN DNA-directed RNA polymerase II subunit RPB2 OS=Homo sapiens OX=9606 GN=POLR2B PE=1 SV=1	0.00125814	1	K	K(1)GFDQEEVFEKPTR	4	-0.32022	7.28197e+06	2.85874e+06	-1.34895	11377000	5.10081e+06	1.15732
sp|P62913|RL11_HUMAN	52	>sp|P62913|RL11_HUMAN 60S ribosomal protein L11 OS=Homo sapiens OX=9606 GN=RPL11 PE=1 SV=2	4.6974e-06	1	K	VLEQLTGQTPVFSK(1)AR	3	1.4284	1	7.90982e+07	26.2371	97176000	4.37162e+07	1.15243
sp|P55854|SUMO3_HUMAN	11	>sp|P55854|SUMO3_HUMAN Small ubiquitin-related modifier 3 OS=Homo sapiens OX=9606 GN=SUMO3 PE=1 SV=2	2.8637e-06	1	K	EGVK(1)TENDHINLK	2	0.85954	2.93526e+07	5.56107e+07	0.921873	34436000	1.54919e+07	1.15241
sp|P41250|GARS_HUMAN	197	>sp|P41250|GARS_HUMAN Glycine--tRNA ligase OS=Homo sapiens OX=9606 GN=GARS PE=1 SV=3	1.25943e-06	1	K	TSGHVDK(1)FADFMVK	2	0.19341	5.75511e+07	3.38478e+07	-0.765782	69005000	3.13161e+07	1.1398
sp|P05388|RLA0_HUMAN;sp|Q8NHW5|RLA0L_HUMAN	26;26	>sp|P05388|RLA0_HUMAN 60S acidic ribosomal protein P0 OS=Homo sapiens OX=9606 GN=RPLP0 PE=1 SV=1;>sp|Q8NHW5|RLA0L_HUMAN 60S acidic ribosomal protein P0-like OS=Homo sapiens OX=9606 GN=RPLP0P6 PE=5 SV=1	4.62761e-80	1	K	IIQLLDDYPK(1)CFIVGADNVGSK	3	-0.59349	2.58e+07	1.22485e+07	-1.07476	49721000	2.25736e+07	1.13922
sp|Q9H7N4|SFR19_HUMAN	158	>sp|Q9H7N4|SFR19_HUMAN Splicing factor, arginine/serine-rich 19 OS=Homo sapiens OX=9606 GN=SCAF1 PE=1 SV=3	0.000315849	1	K	TGK(1)TVSPQSNSSRPTCAR	4	1.1029	4.84315e+06	1	-22.2075	3116400	1.41989e+06	1.1341
sp|Q6YHU6|THADA_HUMAN	1897	>sp|Q6YHU6|THADA_HUMAN Thyroid adenoma-associated protein OS=Homo sapiens OX=9606 GN=THADA PE=1 SV=1	5.19361e-24	1	K	ELPPAAEFVK(1)TVEFTR	3	1.4931	1	1	0	28942000	1.32347e+07	1.12884
sp|O60825|F262_HUMAN	305	>sp|O60825|F262_HUMAN 6-phosphofructo-2-kinase/fructose-2,6-bisphosphatase 2 OS=Homo sapiens OX=9606 GN=PFKFB2 PE=1 SV=2	0.0266796	1	K	VWTSQLK(1)R	2	1.1718	1	1.05547e+07	23.3314	6683500	3.06953e+06	1.12259
sp|P13639|EF2_HUMAN	42	>sp|P13639|EF2_HUMAN Elongation factor 2 OS=Homo sapiens OX=9606 GN=EEF2 PE=1 SV=4	0.000215814	1	K	STLTDSLVCK(1)AGIIASAR	3	-3.7483	2.38061e+07	1.89217e+07	-0.331284	1892000	870144	1.12059
sp|P33121|ACSL1_HUMAN	697	>sp|P33121|ACSL1_HUMAN Long-chain-fatty-acid--CoA ligase 1 OS=Homo sapiens OX=9606 GN=ACSL1 PE=1 SV=1	0.0133664	1	K	SQIDDLYSTIK(1)V	2	2.4616	1.68943e+06	1	-20.6881	24279000	1.11777e+07	1.11909
sp|P52907|CAZA1_HUMAN	166	>sp|P52907|CAZA1_HUMAN F-actin-capping protein subunit alpha-1 OS=Homo sapiens OX=9606 GN=CAPZA1 PE=1 SV=3	3.93807e-14	1	K	TIDGQQTIIACIESHQFQPK(1)NFWNGR	4	-1.0172	1	1.28042e+06	20.2882	4322800	1.99071e+06	1.11868
sp|Q9H246|CA021_HUMAN	20	>sp|Q9H246|CA021_HUMAN Uncharacterized protein C1orf21 OS=Homo sapiens OX=9606 GN=C1orf21 PE=1 SV=1	0.000483283	1	K	HVATVQNEEEAQK(0.817)GK(0.183)	3	0.66786	1	1	0	1934000	893009	1.11484
sp|P15531|NDKA_HUMAN;sp|P22392|NDKB_HUMAN	12;12	>sp|P15531|NDKA_HUMAN Nucleoside diphosphate kinase A OS=Homo sapiens OX=9606 GN=NME1 PE=1 SV=1;>sp|P22392|NDKB_HUMAN Nucleoside diphosphate kinase B OS=Homo sapiens OX=9606 GN=NME2 PE=1 SV=1	3.67631e-12	1	K	TFIAIK(1)PDGVQR	3	0.83477	1.75449e+07	1.70849e+07	-0.038328	55428000	2.56238e+07	1.11313
sp|Q96PY5|FMNL2_HUMAN	355	>sp|Q96PY5|FMNL2_HUMAN Formin-like protein 2 OS=Homo sapiens OX=9606 GN=FMNL2 PE=1 SV=3	0.00114467	1	K	LGLDEYLDK(0.978)LK(0.022)	3	-0.6438	510585	1	-18.9618	4820100	2.23744e+06	1.10721
sp|Q9Y5L0|TNPO3_HUMAN	291	>sp|Q9Y5L0|TNPO3_HUMAN Transportin-3 OS=Homo sapiens OX=9606 GN=TNPO3 PE=1 SV=3	0.000633869	1	K	EDLDK(1)VLNYCR	3	0.45624	1.13936e+07	5.08288e+06	-1.16451	40663000	1.89771e+07	1.09946
sp|P53675|CLH2_HUMAN;sp|Q00610|CLH1_HUMAN	507;507	>sp|P53675|CLH2_HUMAN Clathrin heavy chain 2 OS=Homo sapiens OX=9606 GN=CLTCL1 PE=1 SV=2;>sp|Q00610|CLH1_HUMAN Clathrin heavy chain 1 OS=Homo sapiens OX=9606 GN=CLTC PE=1 SV=5	5.91357e-11	1	K	K(1)VGYTPDWIFLLR	3	-0.85974	3.3649e+06	1.75181e+06	-0.941712	758060	353904	1.09895
sp|P07910|HNRPC_HUMAN;sp|O60812|HNRC1_HUMAN;sp|B2RXH8|HNRC2_HUMAN;sp|P0DMR1|HNRC4_HUMAN;sp|B7ZW38|HNRC3_HUMAN	216;203;203;203;203	>sp|P07910|HNRPC_HUMAN Heterogeneous nuclear ribonucleoproteins C1/C2 OS=Homo sapiens OX=9606 GN=HNRNPC PE=1 SV=4;>sp|O60812|HNRC1_HUMAN Heterogeneous nuclear ribonucleoprotein C-like 1 OS=Homo sapiens OX=9606 GN=HNRNPCL1 PE=1 SV=1;>sp|B2RXH8|HNRC2_HUMAN H	0.001009	1	K	VDSLLENLEK(0.559)IEK(0.324)EQSK(0.117)	4	-0.53915	1	5.07691e+06	22.2755	2696500	1.25981e+06	1.09789
sp|P02545|LMNA_HUMAN	123	>sp|P02545|LMNA_HUMAN Prelamin-A/C OS=Homo sapiens OX=9606 GN=LMNA PE=1 SV=1	3.18048e-06	1	K	K(1)EGDLIAAQAR	2	-0.70133	9.52664e+06	6.45704e+06	-0.561095	15747000	7.36954e+06	1.09543
sp|Q86WA6|BPHL_HUMAN	191	>sp|Q86WA6|BPHL_HUMAN Valacyclovir hydrolase OS=Homo sapiens OX=9606 GN=BPHL PE=1 SV=1	4.61393e-05	1	K	K(1)PLEALYGYDYFAR	3	-0.12368	1	1	0	30362000	1.42221e+07	1.09413
sp|P09497|CLCB_HUMAN	204	>sp|P09497|CLCB_HUMAN Clathrin light chain B OS=Homo sapiens OX=9606 GN=CLTB PE=1 SV=1	2.46775e-06	1	K	VAQLCDFNPK(0.884)SSK(0.116)	3	-1.6851	1	3.2507e+06	21.6323	46071000	2.16155e+07	1.09179
sp|P17844|DDX5_HUMAN;sp|Q92841|DDX17_HUMAN	207;284	>sp|P17844|DDX5_HUMAN Probable ATP-dependent RNA helicase DDX5 OS=Homo sapiens OX=9606 GN=DDX5 PE=1 SV=1;>sp|Q92841|DDX17_HUMAN Probable ATP-dependent RNA helicase DDX17 OS=Homo sapiens OX=9606 GN=DDX17 PE=1 SV=2	0.000158102	1	K	STCIYGGAPK(1)GPQIR	3	0.0061615	1.71563e+07	1.11011e+07	-0.628032	58436000	2.74386e+07	1.09065
sp|P35241|RADI_HUMAN	526	>sp|P35241|RADI_HUMAN Radixin OS=Homo sapiens OX=9606 GN=RDX PE=1 SV=1	1.8589e-67	1	K	K(1)QLQALSSELAQAR	2	0.15689	6.91754e+08	3.73959e+08	-0.887381	492490000	2.31675e+08	1.08799
sp|Q02241|KIF23_HUMAN	577	>sp|Q02241|KIF23_HUMAN Kinesin-like protein KIF23 OS=Homo sapiens OX=9606 GN=KIF23 PE=1 SV=3	5.22974e-17	1	K	IEILEK(1)TTTIYEEDKR	4	-0.4613	4.33303e+07	5.98132e+07	0.465087	65025000	3.06916e+07	1.08315
sp|Q9Y5S1|TRPV2_HUMAN	100	>sp|Q9Y5S1|TRPV2_HUMAN Transient receptor potential cation channel subfamily V member 2 OS=Homo sapiens OX=9606 GN=TRPV2 PE=1 SV=1	1.79478e-05	1	K	GVPEDLAGLPEYLSK(0.983)TSK(0.017)	3	0.34903	1	1	0	140830000	6.64816e+07	1.08293
sp|P09936|UCHL1_HUMAN	71	>sp|P09936|UCHL1_HUMAN Ubiquitin carboxyl-terminal hydrolase isozyme L1 OS=Homo sapiens OX=9606 GN=UCHL1 PE=1 SV=2	2.75458e-05	1	K	QIEELK(1)GQEVSPK	3	0.72792	2.9568e+07	3.4779e+07	0.234181	583300	275815	1.08054
sp|Q8TC07|TBC15_HUMAN	68	>sp|Q8TC07|TBC15_HUMAN TBC1 domain family member 15 OS=Homo sapiens OX=9606 GN=TBC1D15 PE=1 SV=2	0.000590277	1	K	K(1)DSSSVVEWTQAPK	3	-1.6393	1.47564e+07	9.51387e+06	-0.633232	17440000	8.24916e+06	1.08008
sp|Q9NVA4|T184C_HUMAN	428	>sp|Q9NVA4|T184C_HUMAN Transmembrane protein 184C OS=Homo sapiens OX=9606 GN=TMEM184C PE=1 SV=2	1.61267e-53	1	K	ISDEILSDTIGEK(0.975)K(0.025)EPSDK	3	-0.1587	1.12836e+08	3.22744e+07	-1.80577	55335000	2.62092e+07	1.07812
sp|Q00013|EM55_HUMAN	445	>sp|Q00013|EM55_HUMAN 55 kDa erythrocyte membrane protein OS=Homo sapiens OX=9606 GN=MPP1 PE=1 SV=2	4.36534e-07	1	K	SQYAHYFDLSLVNNGVDETLK(0.5)K(0.5)	4	-0.72324	1	1	0	1242300	589233	1.0761
sp|Q9ULC0|MUCEN_HUMAN	244	>sp|Q9ULC0|MUCEN_HUMAN Endomucin OS=Homo sapiens OX=9606 GN=EMCN PE=1 SV=2	1.83425e-21	1	K	LLTVK(1)TISHESGEHSAQGK	3	-0.38065	1	1	0	61897000	2.93853e+07	1.07478
sp|P35998|PRS7_HUMAN	34	>sp|P35998|PRS7_HUMAN 26S proteasome regulatory subunit 7 OS=Homo sapiens OX=9606 GN=PSMC2 PE=1 SV=3	9.14657e-15	1	K	ALDEGDIALLK(1)TYGQSTYSR	3	-0.27673	3.65743e+07	7.48689e+06	-2.28839	23895000	1.13927e+07	1.06859
sp|Q6IN85|P4R3A_HUMAN	585	>sp|Q6IN85|P4R3A_HUMAN Serine/threonine-protein phosphatase 4 regulatory subunit 3A OS=Homo sapiens OX=9606 GN=PPP4R3A PE=1 SV=1	0.00126435	1	K	SFLFEPVVK(1)AFLNNGSR	3	1.0876	1.1531e+06	990047	-0.219952	1214300	579542	1.06714
sp|Q8NBN3|TM87A_HUMAN	484	>sp|Q8NBN3|TM87A_HUMAN Transmembrane protein 87A OS=Homo sapiens OX=9606 GN=TMEM87A PE=1 SV=3	1.68094e-72	1	K	FAFSPLSEEEEEDEQK(1)EPMLK	3	-0.67673	9.9068e+07	5.04233e+07	-0.974327	76695000	3.67395e+07	1.0618
sp|Q9UL46|PSME2_HUMAN	145	>sp|Q9UL46|PSME2_HUMAN Proteasome activator complex subunit 2 OS=Homo sapiens OX=9606 GN=PSME2 PE=1 SV=4	0.000548758	1	K	IEDGNDFGVAIQEK(1)VLER	3	1.0333	5.78844e+06	6.05592e+06	0.0651735	2832800	1.35818e+06	1.06055
sp|P53985|MOT1_HUMAN	224	>sp|P53985|MOT1_HUMAN Monocarboxylate transporter 1 OS=Homo sapiens OX=9606 GN=SLC16A1 PE=1 SV=3	1.05634e-20	1	K	K(1)DLHDANTDLIGRHPK	3	0.73782	1.99172e+07	2.40576e+07	0.272477	22390000	1.07624e+07	1.05685
sp|P45880|VDAC2_HUMAN	64	>sp|P45880|VDAC2_HUMAN Voltage-dependent anion-selective channel protein 2 OS=Homo sapiens OX=9606 GN=VDAC2 PE=1 SV=2	1.93653e-157	1	K	SCSGVEFSTSGSSNTDTGK(1)VTGTLETK	3	-0.67554	1	1	0	22113000	1.06373e+07	1.05577
sp|P04075|ALDOA_HUMAN	153	>sp|P04075|ALDOA_HUMAN Fructose-bisphosphate aldolase A OS=Homo sapiens OX=9606 GN=ALDOA PE=1 SV=2	7.15378e-48	1	K	CVLK(1)IGEHTPSALAIMENANVLAR	4	-0.39476	3.05635e+07	8.8025e+06	-1.79582	3355700	1.62642e+06	1.04492
sp|Q8IXI2|MIRO1_HUMAN	330	>sp|Q8IXI2|MIRO1_HUMAN Mitochondrial Rho GTPase 1 OS=Homo sapiens OX=9606 GN=RHOT1 PE=1 SV=2	0.000123966	1	K	DCALSPDELK(0.999)DLFK(0.001)	3	-0.31897	1.37977e+06	1.05681e+06	-0.384709	6073500	2.94769e+06	1.04294
sp|P53621|COPA_HUMAN	600	>sp|P53621|COPA_HUMAN Coatomer subunit alpha OS=Homo sapiens OX=9606 GN=COPA PE=1 SV=2	0.00200118	1	K	VLTIDPTEFK(0.389)FK(0.611)	3	0.081961	1.14747e+07	1	-23.452	614420	299083	1.03868
sp|Q8TC12|RDH11_HUMAN	83	>sp|Q8TC12|RDH11_HUMAN Retinol dehydrogenase 11 OS=Homo sapiens OX=9606 GN=RDH11 PE=1 SV=2	2.94781e-15	1	K	DVEK(0.001)GELVAK(0.999)EIQTTTGNQQVLVR	3	0.89114	1	4.37439e+06	22.0607	13678000	6.66026e+06	1.03821
sp|P04350|TBB4A_HUMAN	350	>sp|P04350|TBB4A_HUMAN Tubulin beta-4A chain OS=Homo sapiens OX=9606 GN=TUBB4A PE=1 SV=2	2.80405e-140	1	K	NSSYFVEWIPNNVK(1)TAVCDIPPR	3	-0.39289	3.24031e+07	7.72758e+07	1.25388	17562000	8.59219e+06	1.03136
sp|P07437|TBB5_HUMAN;sp|P68371|TBB4B_HUMAN;sp|Q13885|TBB2A_HUMAN;sp|Q9BVA1|TBB2B_HUMAN	350;350;350;350	>sp|P07437|TBB5_HUMAN Tubulin beta chain OS=Homo sapiens OX=9606 GN=TUBB PE=1 SV=2;>sp|P68371|TBB4B_HUMAN Tubulin beta-4B chain OS=Homo sapiens OX=9606 GN=TUBB4B PE=1 SV=1;>sp|Q13885|TBB2A_HUMAN Tubulin beta-2A chain OS=Homo sapiens OX=9606 GN=TUBB2A PE=1	2.80405e-140	1;2	K	NSSYFVEWIPNNVK(1)TAVCDIPPR	3	-0.39289	4.05432e+07	9.11532e+07	1.16883	17562000	8.59219e+06	1.03136
sp|Q8NC42|RN149_HUMAN	260	>sp|Q8NC42|RN149_HUMAN E3 ubiquitin-protein ligase RNF149 OS=Homo sapiens OX=9606 GN=RNF149 PE=2 SV=2	1.21351e-32	1	K	HGEK(1)GIDVDAENCAVCIENFK	3	0.10655	9.31095e+06	7.55964e+06	-0.300611	45376000	2.22436e+07	1.02854
sp|P11940|PABP1_HUMAN	312	>sp|P11940|PABP1_HUMAN Polyadenylate-binding protein 1 OS=Homo sapiens OX=9606 GN=PABPC1 PE=1 SV=2	5.39354e-05	1	K	K(1)EFSPFGTITSAK	3	-0.18684	2.18282e+07	1.76818e+07	-0.303928	27927000	1.37321e+07	1.02411
sp|Q7KZF4|SND1_HUMAN	249	>sp|Q7KZF4|SND1_HUMAN Staphylococcal nuclease domain-containing protein 1 OS=Homo sapiens OX=9606 GN=SND1 PE=1 SV=1	2.96682e-05	1	K	EADGSETPEPFAAEAK(1)FFTESR	3	-2.131	1	1	0	10210000	5.02712e+06	1.02218
sp|P68104|EF1A1_HUMAN;sp|Q5VTE0|EF1A3_HUMAN;sp|Q05639|EF1A2_HUMAN	146;146;146	>sp|P68104|EF1A1_HUMAN Elongation factor 1-alpha 1 OS=Homo sapiens OX=9606 GN=EEF1A1 PE=1 SV=1;>sp|Q5VTE0|EF1A3_HUMAN Putative elongation factor 1-alpha-like 3 OS=Homo sapiens OX=9606 GN=EEF1A1P5 PE=5 SV=1;>sp|Q05639|EF1A2_HUMAN Elongation factor 1-alpha 2	1.07695e-06	1	K	EHALLAYTLGVK(1)QLIVGVNK	4	3.004	1	689355	19.3949	1528000	755565	1.01602
sp|P39023|RL3_HUMAN	294	>sp|P39023|RL3_HUMAN 60S ribosomal protein L3 OS=Homo sapiens OX=9606 GN=RPL3 PE=1 SV=2	0.0255939	1	K	IGQGYLIK(0.991)DGK(0.009)	2	0.82647	6.07777e+06	8.10214e+06	0.414761	8543900	4.23133e+06	1.01378
sp|Q15043|S39AE_HUMAN	276	>sp|Q15043|S39AE_HUMAN Zinc transporter ZIP14 OS=Homo sapiens OX=9606 GN=SLC39A14 PE=1 SV=3	4.51399e-118	1	K	DQEEGVMEK(1)LQNGDLDHMIPQHCSSELDGK	4	-0.66981	7.95131e+07	3.21211e+07	-1.30767	37588000	1.86191e+07	1.01349
sp|P61764|STXB1_HUMAN	92	>sp|P61764|STXB1_HUMAN Syntaxin-binding protein 1 OS=Homo sapiens OX=9606 GN=STXBP1 PE=1 SV=1	4.93565e-06	1	K	SVHSLISDFK(1)DPPTAK	4	-0.48779	2.25282e+07	1	-24.4252	53665000	2.66088e+07	1.01208
sp|P20020|AT2B1_HUMAN	256	>sp|P20020|AT2B1_HUMAN Plasma membrane calcium-transporting ATPase 1 OS=Homo sapiens OX=9606 GN=ATP2B1 PE=1 SV=3	0.000102761	1	K	SLDK(1)DPLLLSGTHVMEGSGR	3	1.3633	5.54349e+07	1.42386e+07	-1.96098	36652000	1.82964e+07	1.00233
sp|O75886|STAM2_HUMAN	182	>sp|O75886|STAM2_HUMAN Signal transducing adapter molecule 2 OS=Homo sapiens OX=9606 GN=STAM2 PE=1 SV=1	2.16349e-63	1	K	AIELSLQEQK(1)QQHTETK	3	0.070112	5.94285e+07	5.07279e+07	-0.228376	98951000	4.96284e+07	0.995547
sp|Q13765|NACA_HUMAN;sp|E9PAV3|NACAM_HUMAN;sp|Q9BZK3|NACP1_HUMAN	108;1971;107	>sp|Q13765|NACA_HUMAN Nascent polypeptide-associated complex subunit alpha OS=Homo sapiens OX=9606 GN=NACA PE=1 SV=1;>sp|E9PAV3|NACAM_HUMAN Nascent polypeptide-associated complex subunit alpha, muscle-specific form OS=Homo sapiens OX=9606 GN=NACA PE=1 SV=1	0.00816799	1	K	NILFVITK(0.682)PDVYK(0.318)	3	0.43777	1.61419e+07	2.06845e+06	-2.96419	653620	328241	0.993697
sp|Q8TAQ2|SMRC2_HUMAN;sp|Q92922|SMRC1_HUMAN	897;905	>sp|Q8TAQ2|SMRC2_HUMAN SWI/SNF complex subunit SMARCC2 OS=Homo sapiens OX=9606 GN=SMARCC2 PE=1 SV=1;>sp|Q92922|SMRC1_HUMAN SWI/SNF complex subunit SMARCC1 OS=Homo sapiens OX=9606 GN=SMARCC1 PE=1 SV=3	0.000169472	1	K	SLVALLVETQMK(0.5)K(0.5)	2	1.353	1.53065e+07	1.33454e+07	-0.197796	11032000	5.54111e+06	0.993446
sp|Q8TAQ2|SMRC2_HUMAN;sp|Q92922|SMRC1_HUMAN	898;906	>sp|Q8TAQ2|SMRC2_HUMAN SWI/SNF complex subunit SMARCC2 OS=Homo sapiens OX=9606 GN=SMARCC2 PE=1 SV=1;>sp|Q92922|SMRC1_HUMAN SWI/SNF complex subunit SMARCC1 OS=Homo sapiens OX=9606 GN=SMARCC1 PE=1 SV=3	0.000169472	1	K	SLVALLVETQMK(0.5)K(0.5)	2	1.353	1.53065e+07	1.33454e+07	-0.197796	11032000	5.54111e+06	0.993446
sp|Q92783|STAM1_HUMAN	57	>sp|Q92783|STAM1_HUMAN Signal transducing adapter molecule 1 OS=Homo sapiens OX=9606 GN=STAM PE=1 SV=3	1.51756e-08	1	K	VNHK(1)DPHVAMQALTLLGACVSNCGK	4	-0.87391	1	1	0	35837000	1.80093e+07	0.992711
sp|P01106|MYC_HUMAN	148	>sp|P01106|MYC_HUMAN Myc proto-oncogene protein OS=Homo sapiens OX=9606 GN=MYC PE=1 SV=1	6.28049e-05	1	K	LVSEK(1)LASYQAAR	2	-1.4988	7.49694e+06	7.30948e+06	-0.0365314	28697000	1.4458e+07	0.989032
sp|Q99808|S29A1_HUMAN	263	>sp|Q99808|S29A1_HUMAN Equilibrative nucleoside transporter 1 OS=Homo sapiens OX=9606 GN=SLC29A1 PE=1 SV=3	3.46655e-103	1	K	AGK(1)EESGVSVSNSQPTNESHSIK	4	0.16775	3.91679e+07	4.56044e+07	0.219503	168770000	8.51325e+07	0.987277
sp|Q3ZCM7|TBB8_HUMAN	122	>sp|Q3ZCM7|TBB8_HUMAN Tubulin beta-8 chain OS=Homo sapiens OX=9606 GN=TUBB8 PE=1 SV=2	1.82659e-163	1;2	K	K(1)EAESCDCLQGFQLTHSLGGGTGSGMGTLLLSK(1)IR	3	-0.12691	1.1686e+09	1.31777e+09	0.173316	1716400	867737	0.984056
sp|A0AVT1|UBA6_HUMAN	544	>sp|A0AVT1|UBA6_HUMAN Ubiquitin-like modifier-activating enzyme 6 OS=Homo sapiens OX=9606 GN=UBA6 PE=1 SV=1	2.49974e-84	1	K	IDAHLNK(1)VCPTTETIYNDEFYTK	4	-0.65268	1.67037e+08	1.35194e+08	-0.30514	123960000	6.27568e+07	0.98203
sp|Q4KMQ2|ANO6_HUMAN	56	>sp|Q4KMQ2|ANO6_HUMAN Anoctamin-6 OS=Homo sapiens OX=9606 GN=ANO6 PE=1 SV=2	1.62523e-14	1	K	TPEFEEFNGK(1)PDSLFFNDGQR	3	-0.34938	1	1	0	16584000	8.40937e+06	0.979722
sp|P55072|TERA_HUMAN	231	>sp|P55072|TERA_HUMAN Transitional endoplasmic reticulum ATPase OS=Homo sapiens OX=9606 GN=VCP PE=1 SV=4	9.13963e-05	1	K	HPALFK(1)AIGVKPPR	3	0.27272	1	1	0	4200100	2.13784e+06	0.974267
sp|Q86TG7|PEG10_HUMAN	567	>sp|Q86TG7|PEG10_HUMAN Retrotransposon-derived protein PEG10 OS=Homo sapiens OX=9606 GN=PEG10 PE=1 SV=2	9.88399e-15	1;2	K	NVK(1)DGLITPTIAPNGAQVLQVK(1)R	4	-0.45148	1.36565e+08	6.99934e+07	-0.964298	113330000	5.77416e+07	0.972847
sp|P37837|TALDO_HUMAN	321	>sp|P37837|TALDO_HUMAN Transaldolase OS=Homo sapiens OX=9606 GN=TALDO1 PE=1 SV=2	0.00720452	1	K	KFAADAVK(1)LER	3	0.83842	1.8015e+07	1	-24.1027	32563000	1.65978e+07	0.972241
sp|Q96FW1|OTUB1_HUMAN	84	>sp|Q96FW1|OTUB1_HUMAN Ubiquitin thioesterase OTUB1 OS=Homo sapiens OX=9606 GN=OTUB1 PE=1 SV=2	0.000102933	1	K	K(1)TRPDGNCFYR	3	-0.31225	4.61684e+07	3.44117e+07	-0.424006	63497000	3.24942e+07	0.966508
sp|P36871|PGM1_HUMAN	349	>sp|P36871|PGM1_HUMAN Phosphoglucomutase-1 OS=Homo sapiens OX=9606 GN=PGM1 PE=1 SV=3	0.000375412	1	K	VASATK(1)IALYETPTGWK	3	-0.11754	1	1	0	14917000	7.63619e+06	0.966033
sp|Q86VP1|TAXB1_HUMAN	588	>sp|Q86VP1|TAXB1_HUMAN Tax1-binding protein 1 OS=Homo sapiens OX=9606 GN=TAX1BP1 PE=1 SV=2	8.24968e-05	1	K	LELAEVQDNYK(0.999)ELK(0.001)	3	1.2269	1	1	0	25867000	1.32567e+07	0.964387
sp|P14866|HNRPL_HUMAN	302	>sp|P14866|HNRPL_HUMAN Heterogeneous nuclear ribonucleoprotein L OS=Homo sapiens OX=9606 GN=HNRNPL PE=1 SV=2	2.60935e-44	1	K	NDQDTWDYTNPNLSGQGDPGSNPNK(1)R	3	-0.74218	1.64752e+07	1.79874e+07	0.126691	51545000	2.64279e+07	0.963769
sp|P17980|PRS6A_HUMAN	16	>sp|P17980|PRS6A_HUMAN 26S proteasome regulatory subunit 6A OS=Homo sapiens OX=9606 GN=PSMC3 PE=1 SV=3	5.12375e-15	1	K	QEK(1)MATVWDEAEQDGIGEEVLK	3	-0.42584	3.04005e+07	2.56186e+07	-0.246901	11845000	6.08663e+06	0.960561
sp|P30825|CTR1_HUMAN	484	>sp|P30825|CTR1_HUMAN High affinity cationic amino acid transporter 1 OS=Homo sapiens OX=9606 GN=SLC7A1 PE=1 SV=1	0.000629294	1	K	TILSPK(1)NMEPSK	3	1.9829	1	1	0	13430000	6.90333e+06	0.960096
sp|Q93009|UBP7_HUMAN	882	>sp|Q93009|UBP7_HUMAN Ubiquitin carboxyl-terminal hydrolase 7 OS=Homo sapiens OX=9606 GN=USP7 PE=1 SV=2	0.0051689	1	K	LYYQQLK(0.971)MK(0.029)	3	1.4342	7.24486e+07	2.15056e+07	-1.75224	272460	140193	0.958631
sp|P24530|EDNRB_HUMAN	304	>sp|P24530|EDNRB_HUMAN Endothelin receptor type B OS=Homo sapiens OX=9606 GN=EDNRB PE=1 SV=1	0.00295599	1	K	K(1)SGMQIALNDHLK	3	-0.15634	4.39125e+06	1	-22.0662	53108000	2.7386e+07	0.95549
sp|P61978|HNRPK_HUMAN	219	>sp|P61978|HNRPK_HUMAN Heterogeneous nuclear ribonucleoprotein K OS=Homo sapiens OX=9606 GN=HNRNPK PE=1 SV=1	1.60797e-10	1	K	IILDLISESPIK(1)GR	3	-0.23015	6.47393e+07	891672	-6.18199	11989000	6.18721e+06	0.954351
sp|O14828|SCAM3_HUMAN	81	>sp|O14828|SCAM3_HUMAN Secretory carrier-associated membrane protein 3 OS=Homo sapiens OX=9606 GN=SCAMP3 PE=1 SV=3	2.52016e-14	1;2	K	LSPTEPK(1)NYGSYSTQASAAAATAELLK	3	0.94135	9.17007e+07	3.50229e+07	-1.38863	114120000	5.90797e+07	0.949817
sp|Q15029|U5S1_HUMAN	352	>sp|Q15029|U5S1_HUMAN 116 kDa U5 small nuclear ribonucleoprotein component OS=Homo sapiens OX=9606 GN=EFTUD2 PE=1 SV=1	0.000270352	1	K	LWGDIYFNPK(1)TR	3	0.2527	9.73142e+06	724702	-3.74719	22486000	1.16598e+07	0.947488
sp|P22314|UBA1_HUMAN	635	>sp|P22314|UBA1_HUMAN Ubiquitin-like modifier-activating enzyme 1 OS=Homo sapiens OX=9606 GN=UBA1 PE=1 SV=3	1.44437e-125	1	K	SIPICTLK(1)NFPNAIEHTLQWAR	4	-0.78514	3.17424e+07	4.44972e+08	3.80923	41037000	2.13173e+07	0.944898
sp|Q9UHE8|STEA1_HUMAN	39	>sp|Q9UHE8|STEA1_HUMAN Metalloreductase STEAP1 OS=Homo sapiens OX=9606 GN=STEAP1 PE=2 SV=1	0.00848035	1	K	DTGETSMLK(1)R	2	-0.3466	1	4.79084e+06	22.1918	10291000	5.35402e+06	0.942689
sp|Q86YT6|MIB1_HUMAN	749	>sp|Q86YT6|MIB1_HUMAN E3 ubiquitin-protein ligase MIB1 OS=Homo sapiens OX=9606 GN=MIB1 PE=1 SV=1	5.79939e-05	1	K	NTLIMGLGTQGAEK(0.962)K(0.038)	3	0.32135	1.90774e+07	1	-24.1854	23668000	1.23378e+07	0.939858
sp|P48739|PIPNB_HUMAN	179	>sp|P48739|PIPNB_HUMAN Phosphatidylinositol transfer protein beta isoform OS=Homo sapiens OX=9606 GN=PITPNB PE=1 SV=2	1.88697e-08	1	K	K(1)ELANSPDCPQMCAYK	3	-2.391	8.05086e+06	1	-22.9407	19970000	1.04287e+07	0.937278
sp|Q05086|UBE3A_HUMAN	553	>sp|Q05086|UBE3A_HUMAN Ubiquitin-protein ligase E3A OS=Homo sapiens OX=9606 GN=UBE3A PE=1 SV=4	4.25541e-05	1	K	LEMIAMENPADLK(0.434)K(0.566)	3	-0.99149	1.93482e+07	2.21333e+07	0.194025	14273000	7.4596e+06	0.936118
sp|Q15154|PCM1_HUMAN	970	>sp|Q15154|PCM1_HUMAN Pericentriolar material 1 protein OS=Homo sapiens OX=9606 GN=PCM1 PE=1 SV=4	1.2378e-74	1	K	NNCPFSADENYRPLAK(1)TR	3	2.6892	1.64926e+08	1.00213e+08	-0.718757	50030000	2.61847e+07	0.934067
sp|P04920|B3A2_HUMAN	658	>sp|P04920|B3A2_HUMAN Anion exchange protein 2 OS=Homo sapiens OX=9606 GN=SLC4A2 PE=1 SV=4	3.06553e-39	1	K	SAQDK(1)ALLQMVEAAGAAEDDPLRR	4	-0.30101	1	1	0	28009000	1.47354e+07	0.926604
sp|Q9H2J7|S6A15_HUMAN	697	>sp|Q9H2J7|S6A15_HUMAN Sodium-dependent neutral amino acid transporter B(0)AT2 OS=Homo sapiens OX=9606 GN=SLC6A15 PE=1 SV=1	1.05339e-05	1	K	K(1)QSGSPTLDTAPNGR	3	0.35239	1	1	0	28358000	1.49224e+07	0.926278
sp|P15311|EZRI_HUMAN;sp|P35241|RADI_HUMAN	79;79	>sp|P15311|EZRI_HUMAN Ezrin OS=Homo sapiens OX=9606 GN=EZR PE=1 SV=4;>sp|P35241|RADI_HUMAN Radixin OS=Homo sapiens OX=9606 GN=RDX PE=1 SV=1	0.00483631	1	K	KENPLQFK(1)FR	3	-1.3841	8.19975e+06	6.24866e+06	-0.392033	4279600	2.25553e+06	0.924012
sp|P62191|PRS4_HUMAN	69	>sp|P62191|PRS4_HUMAN 26S proteasome regulatory subunit 4 OS=Homo sapiens OX=9606 GN=PSMC1 PE=1 SV=1	0.000942523	1	K	IK(1)DYLLMEEEFIR	3	-0.80185	1	2.71365e+06	21.3718	16304000	8.6049e+06	0.921995
sp|P35637|FUS_HUMAN	357	>sp|P35637|FUS_HUMAN RNA-binding protein FUS OS=Homo sapiens OX=9606 GN=FUS PE=1 SV=1	0.000982381	1	K	AAIDWFDGK(0.999)EFSGNPIK(0.001)	3	-1.4513	1	1	0	2880200	1.53562e+06	0.907347
sp|P55268|LAMB2_HUMAN	1748	>sp|P55268|LAMB2_HUMAN Laminin subunit beta-2 OS=Homo sapiens OX=9606 GN=LAMB2 PE=1 SV=2	0.0130808	1	K	DLLQAAQDK(1)LQR	3	1.4106	1.60764e+07	1	-23.9384	1358200	724244	0.907147
sp|O75140|DEPD5_HUMAN	1574	>sp|O75140|DEPD5_HUMAN GATOR complex protein DEPDC5 OS=Homo sapiens OX=9606 GN=DEPDC5 PE=1 SV=2	0.00344101	1	K	LLK(1)DFTDFCINR	3	0.58242	1	1	0	17336000	9.25185e+06	0.905957
sp|P08133|ANXA6_HUMAN	370	>sp|P08133|ANXA6_HUMAN Annexin A6 OS=Homo sapiens OX=9606 GN=ANXA6 PE=1 SV=3	0.000554266	1	K	GTVRPANDFNPDADAK(1)ALR	4	4.0722	2.69104e+07	1.11845e+07	-1.26667	11307000	6.03433e+06	0.90595
sp|O94915|FRYL_HUMAN	2240	>sp|O94915|FRYL_HUMAN Protein furry homolog-like OS=Homo sapiens OX=9606 GN=FRYL PE=1 SV=2	3.12603e-07		K	YVQSPYWK(0.999)EALNILK(0.001)	3	0.12134	672441	1.06288e+06	0.660502	532160	284125	0.905333
sp|Q96EP0|RNF31_HUMAN	908	>sp|Q96EP0|RNF31_HUMAN E3 ubiquitin-protein ligase RNF31 OS=Homo sapiens OX=9606 GN=RNF31 PE=1 SV=1	0.00151813	1	K	HQFCSGCYNAFYAK(0.784)NK(0.216)	3	0.28705	5.08111e+06	872213	-2.54239	481930	257692	0.903173
sp|Q9UNS2|CSN3_HUMAN	418	>sp|Q9UNS2|CSN3_HUMAN COP9 signalosome complex subunit 3 OS=Homo sapiens OX=9606 GN=COPS3 PE=1 SV=3	0.0186016	1	K	SMGSQEDDSGNK(1)PSSYS	2	-0.21997	1	5.18804e+06	22.3068	3817100	2.04106e+06	0.90316
sp|Q9Y289|SC5A6_HUMAN	599	>sp|Q9Y289|SC5A6_HUMAN Sodium-dependent multivitamin transporter OS=Homo sapiens OX=9606 GN=SLC5A6 PE=2 SV=2	2.32967e-05	1	K	SYGQDHLDTGLFPEK(1)PR	4	-1.105	8.22959e+07	3.20089e+07	-1.36235	204590000	1.0948e+08	0.902062
sp|P07437|TBB5_HUMAN;sp|P68371|TBB4B_HUMAN;sp|Q13885|TBB2A_HUMAN;sp|Q9BVA1|TBB2B_HUMAN	324;324;324;324	>sp|P07437|TBB5_HUMAN Tubulin beta chain OS=Homo sapiens OX=9606 GN=TUBB PE=1 SV=2;>sp|P68371|TBB4B_HUMAN Tubulin beta-4B chain OS=Homo sapiens OX=9606 GN=TUBB4B PE=1 SV=1;>sp|Q13885|TBB2A_HUMAN Tubulin beta-2A chain OS=Homo sapiens OX=9606 GN=TUBB2A PE=1	6.34848e-233	1;2	K	MSMK(1)EVDEQMLNVQNK	3	-0.55966	1.37373e+08	2.02749e+08	0.5616	62476000	3.34486e+07	0.901358
sp|Q96KP4|CNDP2_HUMAN	383	>sp|Q96KP4|CNDP2_HUMAN Cytosolic non-specific dipeptidase OS=Homo sapiens OX=9606 GN=CNDP2 PE=1 SV=2	0.000939111	1	K	VYMGHGGK(1)PWVSDFSHPHYLAGR	5	0.13224	1	5.28292e+06	22.3329	15714000	8.42807e+06	0.898776
sp|P63167|DYL1_HUMAN	31	>sp|P63167|DYL1_HUMAN Dynein light chain 1, cytoplasmic OS=Homo sapiens OX=9606 GN=DYNLL1 PE=1 SV=1	2.72422e-10	1	K	NADMSEEMQQDSVECATQALEK(0.995)YNIEK(0.005)	3	-0.06457	1.23555e+07	4.38962e+06	-1.49299	8794200	4.71685e+06	0.89873
sp|O75165|DJC13_HUMAN	685	>sp|O75165|DJC13_HUMAN DnaJ homolog subfamily C member 13 OS=Homo sapiens OX=9606 GN=DNAJC13 PE=1 SV=5	0.00225586	1	K	DNVK(1)IAMDQYGK	2	0.047978	1.64155e+07	1.00079e+06	-4.03585	532610	285775	0.8982
sp|Q53GQ0|DHB12_HUMAN	95	>sp|Q53GQ0|DHB12_HUMAN Very-long-chain 3-oxoacyl-CoA reductase OS=Homo sapiens OX=9606 GN=HSD17B12 PE=1 SV=2	0.0211481	1	K	SKDKLDQVSSEIK(0.994)EK(0.006)	3	-0.20044	4.07091e+07	1.56587e+06	-4.70032	2645800	1.42014e+06	0.897674
sp|P35613|BASI_HUMAN	227	>sp|P35613|BASI_HUMAN Basigin OS=Homo sapiens OX=9606 GN=BSG PE=1 SV=2	3.92399e-21	1	K	AVK(1)SSEHINEGETAMLVCK	3	-0.30639	3.01895e+07	1	-24.8475	63387000	3.43187e+07	0.885194
sp|P07437|TBB5_HUMAN	58	>sp|P07437|TBB5_HUMAN Tubulin beta chain OS=Homo sapiens OX=9606 GN=TUBB PE=1 SV=2	3.11082e-73	1	K	ISVYYNEATGGK(1)YVPR	3	0.67784	4.83995e+09	5.72149e+09	0.241399	998060000	5.41818e+08	0.881319
sp|P53794|SC5A3_HUMAN	555	>sp|P53794|SC5A3_HUMAN Sodium/myo-inositol cotransporter OS=Homo sapiens OX=9606 GN=SLC5A3 PE=1 SV=2	0.00942974	1	K	NLVVK(0.997)ENCSPK(0.003)	2	0.27931	9.31459e+06	3.75986e+06	-1.30881	7472600	4.05768e+06	0.880957
sp|P51809|VAMP7_HUMAN	137	>sp|P51809|VAMP7_HUMAN Vesicle-associated membrane protein 7 OS=Homo sapiens OX=9606 GN=VAMP7 PE=1 SV=3	1.86433e-08	1	K	VMETQAQVDELK(1)GIMVR	3	-0.14909	2.65175e+07	1.3756e+07	-0.94688	49735000	2.70365e+07	0.879353
sp|Q9NS56|TOPRS_HUMAN	249	>sp|Q9NS56|TOPRS_HUMAN E3 ubiquitin-protein ligase Topors OS=Homo sapiens OX=9606 GN=TOPORS PE=1 SV=1	4.30073e-06	1	K	K(1)IQEQDIINFR	3	-0.61352	1	1	0	48913000	2.65941e+07	0.879111
sp|P20020|AT2B1_HUMAN	347	>sp|P20020|AT2B1_HUMAN Plasma membrane calcium-transporting ATPase 1 OS=Homo sapiens OX=9606 GN=ATP2B1 PE=1 SV=3	1.61977e-08	1	K	AQDGAAMEMQPLK(0.021)SEEGGDGDEK(0.901)DK(0.053)K(0.013)K(0.013)	4	-0.13779	9.09555e+06	1.54364e+06	-2.55882	1255600	683159	0.878083
sp|Q9NXW2|DJB12_HUMAN	103	>sp|Q9NXW2|DJB12_HUMAN DnaJ homolog subfamily B member 12 OS=Homo sapiens OX=9606 GN=DNAJB12 PE=1 SV=4	0.000311944	1	K	GYTAEQVAAVK(1)R	3	0.55793	1.07182e+07	1	-23.3536	29271000	1.59281e+07	0.877896
sp|P41440|S19A1_HUMAN	237	>sp|P41440|S19A1_HUMAN Folate transporter 1 OS=Homo sapiens OX=9606 GN=SLC19A1 PE=1 SV=3	1.66121e-05	1	K	MNPGPGGK(1)LGHALR	3	0.21565	1.40268e+07	318041	-5.46282	73021000	3.97494e+07	0.877377
sp|P67809|YBOX1_HUMAN	170	>sp|P67809|YBOX1_HUMAN Nuclease-sensitive element-binding protein 1 OS=Homo sapiens OX=9606 GN=YBX1 PE=1 SV=3	3.98624e-103	1	K	NYQQNYQNSESGEK(1)NEGSESAPEGQAQQR	3	0.29707	2.62439e+07	1.93117e+07	-0.442502	35648000	1.94146e+07	0.876678
sp|Q13637|RAB32_HUMAN	210	>sp|Q13637|RAB32_HUMAN Ras-related protein Rab-32 OS=Homo sapiens OX=9606 GN=RAB32 PE=1 SV=3	3.01488e-10	1	K	ILVNHQSFPNEENDVDK(0.029)IK(0.971)LDQETLR	4	-0.2587	1	1.83311e+07	24.1278	50296000	2.73982e+07	0.876361
sp|Q9UPT9|UBP22_HUMAN	166	>sp|Q9UPT9|UBP22_HUMAN Ubiquitin carboxyl-terminal hydrolase 22 OS=Homo sapiens OX=9606 GN=USP22 PE=1 SV=2	4.81348e-06	1	K	K(1)ITSNCTIGLR	3	0.17414	3.1984e+07	7.00201e+06	-2.19151	12327000	6.71843e+06	0.875625
sp|Q9Y5L4|TIM13_HUMAN	49	>sp|Q9Y5L4|TIM13_HUMAN Mitochondrial import inner membrane translocase subunit Tim13 OS=Homo sapiens OX=9606 GN=TIMM13 PE=1 SV=1	0.00234335	1	K	K(0.846)CIGK(0.154)PGGSLDNSEQK	3	-1.7626	1	1	0	4115700	2.24355e+06	0.875354
sp|P55327|TPD52_HUMAN	102	>sp|P55327|TPD52_HUMAN Tumor protein D52 OS=Homo sapiens OX=9606 GN=TPD52 PE=1 SV=2	1.50058e-05	1	K	VEEEIQTLSQVLAAK(0.358)EK(0.642)	3	-0.81623	1	381059	18.5397	1368800	746363	0.874962
sp|P32189|GLPK_HUMAN;sp|Q14409|GLPK3_HUMAN;sp|Q14410|GLPK2_HUMAN	356;350;350	>sp|P32189|GLPK_HUMAN Glycerol kinase OS=Homo sapiens OX=9606 GN=GK PE=1 SV=3;>sp|Q14409|GLPK3_HUMAN Glycerol kinase 3 OS=Homo sapiens OX=9606 GN=GK3P PE=2 SV=2;>sp|Q14410|GLPK2_HUMAN Glycerol kinase 2 OS=Homo sapiens OX=9606 GN=GK2 PE=2 SV=2	2.25595e-07	1	K	LAK(1)EVGTSYGCYFVPAFSGLYAPYWEPSAR	3	0.56521	1	1	0	7608400	4.15434e+06	0.872974
sp|Q9P0L0|VAPA_HUMAN	211	>sp|Q9P0L0|VAPA_HUMAN Vesicle-associated membrane protein-associated protein A OS=Homo sapiens OX=9606 GN=VAPA PE=1 SV=3	1.45692e-05	1	K	VAHSDK(1)PGSTSTASFR	4	-0.50307	1	1	0	15001000	8.19466e+06	0.872303
sp|Q92621|NU205_HUMAN	321	>sp|Q92621|NU205_HUMAN Nuclear pore complex protein Nup205 OS=Homo sapiens OX=9606 GN=NUP205 PE=1 SV=3	7.98912e-05	1	K	LQDSQLWK(1)LPGLQATVR	3	-0.68344	4.97734e+07	1.0882e+06	-5.51536	355190	194244	0.870722
sp|Q99808|S29A1_HUMAN	249	>sp|Q99808|S29A1_HUMAN Equilibrative nucleoside transporter 1 OS=Homo sapiens OX=9606 GN=SLC29A1 PE=1 SV=3	1.32936e-53	1	K	LEGPGEQETK(1)LDLISK	2	0.30155	2.54667e+08	1.72372e+08	-0.563083	589440000	3.22681e+08	0.869238
sp|Q32P44|EMAL3_HUMAN	577	>sp|Q32P44|EMAL3_HUMAN Echinoderm microtubule-associated protein-like 3 OS=Homo sapiens OX=9606 GN=EML3 PE=1 SV=1	1.59729e-99	1	K	AIAEGLGSELLVGTTK(1)NALLR	3	-3.2334	3.93512e+08	1.67361e+08	-1.23345	137000000	7.50347e+07	0.868546
sp|O15126|SCAM1_HUMAN	89	>sp|O15126|SCAM1_HUMAN Secretory carrier-associated membrane protein 1 OS=Homo sapiens OX=9606 GN=SCAMP1 PE=1 SV=2	4.11599e-38	1	K	EHALAQAELLK(1)R	3	1.1505	8.89325e+08	5.55592e+08	-0.678685	1521300000	8.33581e+08	0.867911
sp|Q9NRW7|VPS45_HUMAN	450	>sp|Q9NRW7|VPS45_HUMAN Vacuolar protein sorting-associated protein 45 OS=Homo sapiens OX=9606 GN=VPS45 PE=1 SV=1	7.08287e-05	1	K	DAVAITK(1)QFLK	2	0.020125	6.66052e+07	4.16571e+07	-0.677073	31823000	1.74508e+07	0.866778
sp|Q96EE3|SEH1_HUMAN	96	>sp|Q96EE3|SEH1_HUMAN Nucleoporin SEH1 OS=Homo sapiens OX=9606 GN=SEH1L PE=1 SV=3	0.000122491	1	K	TAAVWEEIVGESNDK(1)LR	3	0.6986	1	478899	18.8694	5241900	2.87523e+06	0.866415
sp|Q96CW1|AP2M1_HUMAN	224	>sp|Q96CW1|AP2M1_HUMAN AP-2 complex subunit mu OS=Homo sapiens OX=9606 GN=AP2M1 PE=1 SV=2	0.000102586	2	K	IVIEK(1)QGK(1)GTADETSK	3	-1.0725	1.10692e+07	1.15971e+07	0.0672133	3576800	1.96492e+06	0.864195
sp|Q96CW1|AP2M1_HUMAN	227	>sp|Q96CW1|AP2M1_HUMAN AP-2 complex subunit mu OS=Homo sapiens OX=9606 GN=AP2M1 PE=1 SV=2	0.000102586	2	K	IVIEK(1)QGK(1)GTADETSK	3	-1.0725	1.10692e+07	1.15971e+07	0.0672133	3576800	1.96492e+06	0.864195
sp|Q9H2J7|S6A15_HUMAN	47	>sp|Q9H2J7|S6A15_HUMAN Sodium-dependent neutral amino acid transporter B(0)AT2 OS=Homo sapiens OX=9606 GN=SLC6A15 PE=1 SV=1	1.44215e-79	1	K	TSELIVDGQEEK(1)DTDVEEGSEVEDERPAWNSK	4	-1.1478	2.47171e+07	1	-24.559	112120000	6.17267e+07	0.861078
sp|Q92783|STAM1_HUMAN	170	>sp|Q92783|STAM1_HUMAN Signal transducing adapter molecule 1 OS=Homo sapiens OX=9606 GN=STAM PE=1 SV=3	9.08957e-54	1	K	DPGTVANK(0.987)K(0.013)EEEDLAK	3	-0.20544	1.06844e+08	6.43358e+07	-0.731815	476420000	2.62874e+08	0.857863
sp|O43157|PLXB1_HUMAN	1855	>sp|O43157|PLXB1_HUMAN Plexin-B1 OS=Homo sapiens OX=9606 GN=PLXNB1 PE=1 SV=3	0.00128339	1	K	VPDGATVALVPCLTK(1)HVLR	4	-1.2395	1	1	0	9541000	5.27874e+06	0.853946
sp|P06733|ENOA_HUMAN	81	>sp|P06733|ENOA_HUMAN Alpha-enolase OS=Homo sapiens OX=9606 GN=ENO1 PE=1 SV=2	1.09779e-14	1	K	K(1)LNVTEQEKIDK	3	0.28548	7.32709e+07	5.88048e+07	-0.317308	50866000	2.81632e+07	0.852889
sp|P15311|EZRI_HUMAN;sp|P26038|MOES_HUMAN;sp|P35241|RADI_HUMAN	263;263;263	>sp|P15311|EZRI_HUMAN Ezrin OS=Homo sapiens OX=9606 GN=EZR PE=1 SV=4;>sp|P26038|MOES_HUMAN Moesin OS=Homo sapiens OX=9606 GN=MSN PE=1 SV=3;>sp|P35241|RADI_HUMAN Radixin OS=Homo sapiens OX=9606 GN=RDX PE=1 SV=1	0.00235425	1	K	K(1)APDFVFYAPR	3	3.2264	1	1	0	12951000	7.17609e+06	0.851794
sp|O95071|UBR5_HUMAN	672	>sp|O95071|UBR5_HUMAN E3 ubiquitin-protein ligase UBR5 OS=Homo sapiens OX=9606 GN=UBR5 PE=1 SV=2	0.00633024	1	K	VLK(1)VDGAYVAVK	3	0.54125	1	1	0	20264000	1.12545e+07	0.848412
sp|O60244|MED14_HUMAN	176	>sp|O60244|MED14_HUMAN Mediator of RNA polymerase II transcription subunit 14 OS=Homo sapiens OX=9606 GN=MED14 PE=1 SV=2	0.00523225	1	K	DK(1)IIPPDPITK	3	-0.19938	1	1	0	22750000	1.26628e+07	0.845268
sp|P00441|SODC_HUMAN	31	>sp|P00441|SODC_HUMAN Superoxide dismutase [Cu-Zn] OS=Homo sapiens OX=9606 GN=SOD1 PE=1 SV=2	0.0448239	1	K	ESNGPVK(0.998)VWGSIK(0.002)	2	1.5875	1	3.07381e+06	21.5516	9148400	5.09397e+06	0.844729
sp|Q8WWI5|CTL1_HUMAN	648	>sp|Q8WWI5|CTL1_HUMAN Choline transporter-like protein 1 OS=Homo sapiens OX=9606 GN=SLC44A1 PE=1 SV=1	0.00123521	1	K	ELK(1)PMASGASSA	2	-3.3394	2.96088e+07	2.84793e+07	-0.0561082	28071000	1.56849e+07	0.839701
sp|Q9H0F6|SHRPN_HUMAN	318	>sp|Q9H0F6|SHRPN_HUMAN Sharpin OS=Homo sapiens OX=9606 GN=SHARPIN PE=1 SV=1	1.62523e-14	1	K	EAPATGPSPQHPQK(1)MDGELGR	3	-0.51278	1.8913e+07	1.21446e+07	-0.639066	15069000	8.46009e+06	0.832839
sp|P50502|F10A1_HUMAN;sp|Q8IZP2|ST134_HUMAN	118;114	>sp|P50502|F10A1_HUMAN Hsc70-interacting protein OS=Homo sapiens OX=9606 GN=ST13 PE=1 SV=2;>sp|Q8IZP2|ST134_HUMAN Putative protein FAM10A4 OS=Homo sapiens OX=9606 GN=ST13P4 PE=5 SV=1	1.40817e-05	1	K	K(1)VAAIEALNDGELQK	2	0.81888	1.75435e+07	8.78346e+06	-0.998071	66819000	3.75168e+07	0.832723
sp|Q06481|APLP2_HUMAN	744	>sp|Q06481|APLP2_HUMAN Amyloid-like protein 2 OS=Homo sapiens OX=9606 GN=APLP2 PE=1 SV=2	1.11321e-12	1	K	HLNK(1)MQNHGYENPTYK	4	-0.33866	2.19577e+07	1.80718e+07	-0.280989	15637000	8.82035e+06	0.826056
sp|P48729|KC1A_HUMAN	304	>sp|P48729|KC1A_HUMAN Casein kinase I isoform alpha OS=Homo sapiens OX=9606 GN=CSNK1A1 PE=1 SV=2	4.87287e-126	1	K	QK(1)AAQQAASSSGQGQQAQTPTGK	3	-0.11984	5.07747e+06	1	-22.2757	5371700	3.03214e+06	0.825044
sp|Q9UNN5|FAF1_HUMAN	221	>sp|Q9UNN5|FAF1_HUMAN FAS-associated factor 1 OS=Homo sapiens OX=9606 GN=FAF1 PE=1 SV=2	1.72877e-33	1	K	EYNLNFSGSSTIQEVK(1)R	3	-1.56	3.4413e+07	3.87861e+07	0.172583	14594000	8.23914e+06	0.824809
sp|Q05655|KPCD_HUMAN	222	>sp|Q05655|KPCD_HUMAN Protein kinase C delta type OS=Homo sapiens OX=9606 GN=PRKCD PE=1 SV=2	0.00574981	1	K	DTIFQK(1)ER	2	-2.1123	4.28602e+06	4.54346e+06	0.0841525	40404000	2.28314e+07	0.823476
sp|Q9GZZ1|NAA50_HUMAN	34	>sp|Q9GZZ1|NAA50_HUMAN N-alpha-acetyltransferase 50 OS=Homo sapiens OX=9606 GN=NAA50 PE=1 SV=1	1.14114e-14	1	K	LNQVIFPVSYNDK(0.995)FYK(0.005)	3	1.3317	1	2.1341e+06	21.0252	10553000	5.97054e+06	0.82172
sp|Q8WVD5|RN141_HUMAN	147	>sp|Q8WVD5|RN141_HUMAN RING finger protein 141 OS=Homo sapiens OX=9606 GN=RNF141 PE=1 SV=1	2.77462e-06	1	K	VK(1)QLTDEEECCICMDGR	3	0.13229	1.2396e+07	1.04498e+07	-0.246401	17463000	9.89147e+06	0.820045
sp|P62750|RL23A_HUMAN	115	>sp|P62750|RL23A_HUMAN 60S ribosomal protein L23a OS=Homo sapiens OX=9606 GN=RPL23A PE=1 SV=1	0.0300737	1	K	K(1)LYDIDVAK	2	2.5193	1	7.70772e+06	22.8779	12897000	7.30917e+06	0.819256
sp|P55769|NH2L1_HUMAN	113	>sp|P55769|NH2L1_HUMAN NHP2-like protein 1 OS=Homo sapiens OX=9606 GN=SNU13 PE=1 SV=3	0.000540348	1	K	EGSQLK(1)QQIQSIQQSIER	3	1.3887	1	1	0	9426000	5.34889e+06	0.817407
sp|P62937|PPIA_HUMAN	155	>sp|P62937|PPIA_HUMAN Peptidyl-prolyl cis-trans isomerase A OS=Homo sapiens OX=9606 GN=PPIA PE=1 SV=2	0.00297957	1	K	K(1)ITIADCGQLE	2	-1.6763	4.95245e+07	4.65871e+07	-0.0882117	79248000	4.50543e+07	0.814709
sp|P04899|GNAI2_HUMAN;sp|P08754|GNAI3_HUMAN;sp|P63096|GNAI1_HUMAN	249;248;248	>sp|P04899|GNAI2_HUMAN Guanine nucleotide-binding protein G(i) subunit alpha-2 OS=Homo sapiens OX=9606 GN=GNAI2 PE=1 SV=3;>sp|P08754|GNAI3_HUMAN Guanine nucleotide-binding protein G(k) subunit alpha OS=Homo sapiens OX=9606 GN=GNAI3 PE=1 SV=3;>sp|P63096|GNA	0.000147546	1	K	MHESMK(1)LFDSICNNK	3	-0.52466	2.82378e+07	1.74595e+07	-0.693614	37183000	2.11951e+07	0.81091
sp|P23497|SP100_HUMAN	225	>sp|P23497|SP100_HUMAN Nuclear autoantigen Sp-100 OS=Homo sapiens OX=9606 GN=SP100 PE=1 SV=3	3.82985e-58	1	K	DTTSDK(1)DDSLGSQQTNEQCAQK	3	0.8581	4.45005e+06	1.12555e+07	1.33874	714080	407857	0.808022
sp|Q5T4S7|UBR4_HUMAN	1079	>sp|Q5T4S7|UBR4_HUMAN E3 ubiquitin-protein ligase UBR4 OS=Homo sapiens OX=9606 GN=UBR4 PE=1 SV=1	2.03665e-06	1	K	AEHASSLLELASTTK(0.985)CSSVK(0.015)	3	-0.41436	4.71697e+07	2.23237e+07	-1.07928	20122000	1.15498e+07	0.800908
sp|P05023|AT1A1_HUMAN	9	>sp|P05023|AT1A1_HUMAN Sodium/potassium-transporting ATPase subunit alpha-1 OS=Homo sapiens OX=9606 GN=ATP1A1 PE=1 SV=1	2.34625e-37	1	K	DK(1)YEPAAVSEQGDKK	4	0.81754	5.44423e+06	3.30554e+06	-0.719842	8750300	5.02321e+06	0.800722
sp|Q08357|S20A2_HUMAN	278	>sp|Q08357|S20A2_HUMAN Sodium-dependent phosphate transporter 2 OS=Homo sapiens OX=9606 GN=SLC20A2 PE=1 SV=1	4.21481e-32	1	K	ELPGAK(1)ANDDSTIPLTGAAGETLGTSEGTSAGSHPR	4	-0.049308	1.23948e+08	5.07104e+07	-1.28938	57536000	3.30331e+07	0.800554
sp|Q9NPD8|UBE2T_HUMAN	91	>sp|Q9NPD8|UBE2T_HUMAN Ubiquitin-conjugating enzyme E2 T OS=Homo sapiens OX=9606 GN=UBE2T PE=1 SV=1	0.00104954	1	K	ICLDVLK(1)LPPK	3	-0.18566	2.23914e+07	1.65159e+07	-0.439091	14016000	8.04716e+06	0.800523
sp|P17081|RHOQ_HUMAN	139	>sp|P17081|RHOQ_HUMAN Rho-related GTP-binding protein RhoQ OS=Homo sapiens OX=9606 GN=RHOQ PE=1 SV=2	2.51049e-11	1	K	LNDMK(0.988)EK(0.012)PICVEQGQK	3	0.43544	1.01542e+06	1.79339e+06	0.820609	16744000	9.61529e+06	0.800242
sp|P08195|4F2_HUMAN	145	>sp|P08195|4F2_HUMAN 4F2 cell-surface antigen heavy chain OS=Homo sapiens OX=9606 GN=SLC3A2 PE=1 SV=3	3.14101e-17	1;2	K	NGLVK(1)IK(1)VAEDEAEAAAAAK	3	-0.33444	6.06642e+06	829416	-2.87068	27989000	1.60919e+07	0.798527
sp|Q68DH5|LMBD2_HUMAN	296	>sp|Q68DH5|LMBD2_HUMAN LMBR1 domain-containing protein 2 OS=Homo sapiens OX=9606 GN=LMBRD2 PE=1 SV=1	1.69181e-20	1	K	NMDDYEDFDEK(1)HSIYPSEK	3	-0.21644	6.22215e+07	2.66487e+07	-1.22335	37646000	2.17169e+07	0.793675
sp|Q9Y666|S12A7_HUMAN	976	>sp|Q9Y666|S12A7_HUMAN Solute carrier family 12 member 7 OS=Homo sapiens OX=9606 GN=SLC12A7 PE=1 SV=3	5.3712e-17	1	K	TQAPPTPDK(1)VQMTWTR	3	0.24655	1.02952e+07	1	-23.2955	103170000	5.95722e+07	0.792312
sp|P09543|CN37_HUMAN	217	>sp|P09543|CN37_HUMAN 2',3'-cyclic-nucleotide 3'-phosphodiesterase OS=Homo sapiens OX=9606 GN=CNP PE=1 SV=2	2.01304e-05	1	K	AGQVFLEELGNHK(0.971)AFK(0.029)	3	-0.66559	4.6653e+06	1.80316e+07	1.95049	33275000	1.9246e+07	0.789882
sp|Q96CX6|LRC58_HUMAN	111	>sp|Q96CX6|LRC58_HUMAN Leucine-rich repeat-containing protein 58 OS=Homo sapiens OX=9606 GN=LRRC58 PE=1 SV=2	5.58446e-07	1	K	LGGPSALPK(1)GLAQSPLCR	3	-0.23691	8.79589e+06	1	-23.0684	23976000	1.3891e+07	0.787443
sp|Q9BVK6|TMED9_HUMAN	180	>sp|Q9BVK6|TMED9_HUMAN Transmembrane emp24 domain-containing protein 9 OS=Homo sapiens OX=9606 GN=TMED9 PE=1 SV=2	3.29712e-234	1	K	QLVEQVEQIQK(1)EQNYQR	3	1.4435	6.53229e+07	7.18034e+07	0.136463	18984000	1.10018e+07	0.787042
sp|P05362|ICAM1_HUMAN	524	>sp|P05362|ICAM1_HUMAN Intercellular adhesion molecule 1 OS=Homo sapiens OX=9606 GN=ICAM1 PE=1 SV=2	3.13159e-06	1	K	GTPMK(1)PNTQATPP	2	-0.39203	1	2.43025e+06	21.2127	310390000	1.79934e+08	0.786616
sp|P23634|AT2B4_HUMAN	252	>sp|P23634|AT2B4_HUMAN Plasma membrane calcium-transporting ATPase 4 OS=Homo sapiens OX=9606 GN=ATP2B4 PE=1 SV=2	1.50305e-07	1	K	SLDK(1)DPMLLSGTHVMEGSGR	3	2.1071	2.53095e+07	2.77467e+07	0.132636	40560000	2.35635e+07	0.783507
sp|P67936|TPM4_HUMAN	197	>sp|P67936|TPM4_HUMAN Tropomyosin alpha-4 chain OS=Homo sapiens OX=9606 GN=TPM4 PE=1 SV=3	0.00556606	1	K	LLSDK(0.046)LK(0.954)EAETR	3	0.5216	1.99725e+07	2.14593e+07	0.103588	7801800	4.54246e+06	0.780333
sp|P42167|LAP2B_HUMAN	393	>sp|P42167|LAP2B_HUMAN Lamina-associated polypeptide 2, isoforms beta/gamma OS=Homo sapiens OX=9606 GN=TMPO PE=1 SV=2	0.000963474	1	K	YVPK(1)YVPLADVK	3	0.0022503	7.51265e+07	1	-26.1628	91820000	5.34644e+07	0.780229
sp|P04406|G3P_HUMAN	263	>sp|P04406|G3P_HUMAN Glyceraldehyde-3-phosphate dehydrogenase OS=Homo sapiens OX=9606 GN=GAPDH PE=1 SV=3	0.000652966	1	K	VVK(1)QASEGPLK	2	0.31553	4.43185e+06	2.26087e+06	-0.971029	5333800	3.10656e+06	0.779847
sp|Q99808|S29A1_HUMAN	255	>sp|Q99808|S29A1_HUMAN Equilibrative nucleoside transporter 1 OS=Homo sapiens OX=9606 GN=SLC29A1 PE=1 SV=3	5.8292e-06	1	K	LDLISK(1)GEEPR	2	-1.3455	6.5387e+08	2.17907e+08	-1.58529	730160000	4.26677e+08	0.775069
sp|P25445|TNR6_HUMAN	316	>sp|P25445|TNR6_HUMAN Tumor necrosis factor receptor superfamily member 6 OS=Homo sapiens OX=9606 GN=FAS PE=1 SV=1	2.89509e-60	1	K	IQTIILK(1)DITSDSENSNFR	3	0.18854	1	1	0	90350000	5.28057e+07	0.77483
sp|P62805|H4_HUMAN	32	>sp|P62805|H4_HUMAN Histone H4 OS=Homo sapiens OX=9606 GN=HIST1H4A PE=1 SV=2	0.000162566	1	K	DNIQGITK(1)PAIR	3	0.71179	7.05406e+07	3.74442e+07	-0.91371	240750000	1.40767e+08	0.774224
sp|P07737|PROF1_HUMAN	54	>sp|P07737|PROF1_HUMAN Profilin-1 OS=Homo sapiens OX=9606 GN=PFN1 PE=1 SV=2	1.13156e-46	1	K	TFVNITPAEVGVLVGK(1)DR	3	0.37421	1.92477e+08	5.144e+06	-5.22565	39135000	2.29109e+07	0.772426
sp|O94979|SC31A_HUMAN	729	>sp|O94979|SC31A_HUMAN Protein transport protein Sec31A OS=Homo sapiens OX=9606 GN=SEC31A PE=1 SV=3	1.10068e-06	1	K	K(1)AVQLTQAMDTSTVGVLLAAK	3	1.487	3.47696e+07	2.22157e+07	-0.646251	17218000	1.00838e+07	0.771876
sp|Q07020|RL18_HUMAN	78	>sp|Q07020|RL18_HUMAN 60S ribosomal protein L18 OS=Homo sapiens OX=9606 GN=RPL18 PE=1 SV=2	1.14635e-08	1	K	ENK(1)TAVVVGTITDDVR	2	0.57531	6.56184e+07	6.49697e+07	-0.0143341	111300000	6.54502e+07	0.765983
sp|Q9Y4A5|TRRAP_HUMAN	3834	>sp|Q9Y4A5|TRRAP_HUMAN Transformation/transcription domain-associated protein OS=Homo sapiens OX=9606 GN=TRRAP PE=1 SV=3	8.61786e-18	1	K	LHNLAQFEGGESK(1)VNTLVAAANSLDNLCR	4	1.783	1	1	0	4577600	2.69229e+06	0.76576
sp|Q92974|ARHG2_HUMAN	100	>sp|Q92974|ARHG2_HUMAN Rho guanine nucleotide exchange factor 2 OS=Homo sapiens OX=9606 GN=ARHGEF2 PE=1 SV=4	1.97859e-06	1	K	AALLK(1)NNTALQSVSLR	3	1.1194	1	1	0	34495000	2.03165e+07	0.763737
sp|P31946|1433B_HUMAN	140	>sp|P31946|1433B_HUMAN 14-3-3 protein beta/alpha OS=Homo sapiens OX=9606 GN=YWHAB PE=1 SV=3	3.1977e-118	1	K	YLSEVASGDNK(1)QTTVSNSQQAYQEAFEISKK	4	0.44714	4.68713e+07	7.239e+07	0.627084	91506000	5.3897e+07	0.763661
sp|P98196|AT11A_HUMAN	626	>sp|P98196|AT11A_HUMAN Probable phospholipid-transporting ATPase IH OS=Homo sapiens OX=9606 GN=ATP11A PE=1 SV=3	2.259e-06	1	K	LIQEEYEGICK(1)LLQAAK	3	0.22032	2.19068e+06	1	-21.0629	6140500	3.62788e+06	0.759229
sp|P09211|GSTP1_HUMAN	103	>sp|P09211|GSTP1_HUMAN Glutathione S-transferase P OS=Homo sapiens OX=9606 GN=GSTP1 PE=1 SV=2	6.85418e-05	1	K	CK(1)YISLIYTNYEAGKDDYVK	4	1.6083	1	1	0	22898000	1.35305e+07	0.759009
sp|Q9HCU5|PREB_HUMAN	209	>sp|Q9HCU5|PREB_HUMAN Prolactin regulatory element-binding protein OS=Homo sapiens OX=9606 GN=PREB PE=1 SV=2	2.02615e-05	1	K	AHEGEIEDLALGPDGK(1)LVTVGR	4	1.4454	1	9.17315e+06	23.129	40695000	2.40474e+07	0.758972
sp|P62937|PPIA_HUMAN	28	>sp|P62937|PPIA_HUMAN Peptidyl-prolyl cis-trans isomerase A OS=Homo sapiens OX=9606 GN=PPIA PE=1 SV=2	0.000279039	1	K	VSFELFADK(0.999)VPK(0.001)	3	-0.24089	1.63296e+08	1.72156e+06	-6.56763	371450000	2.19516e+08	0.758843
sp|P68104|EF1A1_HUMAN;sp|Q5VTE0|EF1A3_HUMAN	172;172	>sp|P68104|EF1A1_HUMAN Elongation factor 1-alpha 1 OS=Homo sapiens OX=9606 GN=EEF1A1 PE=1 SV=1;>sp|Q5VTE0|EF1A3_HUMAN Putative elongation factor 1-alpha-like 3 OS=Homo sapiens OX=9606 GN=EEF1A1P5 PE=5 SV=1	9.24093e-06	1	K	YEEIVK(1)EVSTYIK	3	-0.3108	2.97907e+07	2.24914e+07	-0.405486	52340000	3.09385e+07	0.758511
sp|P63244|RACK1_HUMAN	106	>sp|P63244|RACK1_HUMAN Receptor of activated protein C kinase 1 OS=Homo sapiens OX=9606 GN=RACK1 PE=1 SV=3	2.45324e-11	1	K	RFVGHTK(1)DVLSVAFSSDNR	3	-0.12599	1.21569e+08	1.49898e+08	0.302214	116980000	6.91628e+07	0.758194
sp|P53794|SC5A3_HUMAN	642	>sp|P53794|SC5A3_HUMAN Sodium/myo-inositol cotransporter OS=Homo sapiens OX=9606 GN=SLC5A3 PE=1 SV=2	1.17355e-14	1	K	EEGNPVASLGHSEAETPVDAYSNGQAALMGEK(1)ER	4	-0.74696	1.51813e+07	1.29503e+07	-0.229313	18915000	1.11978e+07	0.756311
sp|P04792|HSPB1_HUMAN	114	>sp|P04792|HSPB1_HUMAN Heat shock protein beta-1 OS=Homo sapiens OX=9606 GN=HSPB1 PE=1 SV=2	1.37361e-07	1	K	TK(1)DGVVEITGK	2	-1.22	2.88258e+07	4.32304e+07	0.584689	20505000	1.21459e+07	0.755507
sp|P35998|PRS7_HUMAN	110	>sp|P35998|PRS7_HUMAN 26S proteasome regulatory subunit 7 OS=Homo sapiens OX=9606 GN=PSMC2 PE=1 SV=3	0.000690708	1	K	IINADSEDPK(0.999)YIINVK(0.001)	3	0.84038	1	2.12679e+07	24.3422	32395000	1.92118e+07	0.753782
sp|Q15149|PLEC_HUMAN	1210	>sp|Q15149|PLEC_HUMAN Plectin OS=Homo sapiens OX=9606 GN=PLEC PE=1 SV=3	5.114e-29	1	K	SELELTLGK(1)LEQVR	3	-1.6775	1.9779e+07	1.96359e+07	-0.0104734	28510000	1.69253e+07	0.752286
sp|Q9ULC3|RAB23_HUMAN	132	>sp|Q9ULC3|RAB23_HUMAN Ras-related protein Rab-23 OS=Homo sapiens OX=9606 GN=RAB23 PE=1 SV=1	1.70426e-09	1	K	IDLLDDSCIK(1)NEEAEALAK	3	-1.5356	2.18223e+07	2.51618e+07	0.205427	1606000	953427	0.752278
sp|P05023|AT1A1_HUMAN;sp|P13637|AT1A3_HUMAN;sp|P50993|AT1A2_HUMAN	605;595;602	>sp|P05023|AT1A1_HUMAN Sodium/potassium-transporting ATPase subunit alpha-1 OS=Homo sapiens OX=9606 GN=ATP1A1 PE=1 SV=1;>sp|P13637|AT1A3_HUMAN Sodium/potassium-transporting ATPase subunit alpha-3 OS=Homo sapiens OX=9606 GN=ATP1A3 PE=1 SV=3;>sp|P50993|AT1A2	9.33653e-08	1	K	AAVPDAVGK(1)CR	2	-0.34577	1	3.0418e+06	21.5365	730620000	4.33948e+08	0.7516
sp|P56693|SOX10_HUMAN	67	>sp|P56693|SOX10_HUMAN Transcription factor SOX-10 OS=Homo sapiens OX=9606 GN=SOX10 PE=1 SV=1	0.000101589	1	K	EQQDGEADDDK(1)FPVCIR	3	0.030777	1	1	0	22459000	1.33435e+07	0.751157
sp|P36578|RL4_HUMAN	353	>sp|P36578|RL4_HUMAN 60S ribosomal protein L4 OS=Homo sapiens OX=9606 GN=RPL4 PE=1 SV=5	0.000346663	1;2	K	VDK(1)AAAAAAALQAK	3	-0.19598	3.95637e+07	4.00456e+07	0.0174654	24553000	1.46022e+07	0.749713
sp|Q13200|PSMD2_HUMAN	178	>sp|Q13200|PSMD2_HUMAN 26S proteasome non-ATPase regulatory subunit 2 OS=Homo sapiens OX=9606 GN=PSMD2 PE=1 SV=3	0.0115004		K	EWQELDDAEK(1)VQR	3	0.004899	1	3.82736e+07	25.1898	9032100	5.38139e+06	0.747082
sp|Q6IA86|ELP2_HUMAN	256	>sp|Q6IA86|ELP2_HUMAN Elongator complex protein 2 OS=Homo sapiens OX=9606 GN=ELP2 PE=1 SV=2	0.00621698	1	K	LK(1)ENTFTIENESVK	3	0.52534	1.80048e+07	1.9854e+07	0.14105	24926000	1.48564e+07	0.746568
sp|Q12913|PTPRJ_HUMAN	1031	>sp|Q12913|PTPRJ_HUMAN Receptor-type tyrosine-protein phosphatase eta OS=Homo sapiens OX=9606 GN=PTPRJ PE=1 SV=3	0.00206032	1	K	VENFEAYFK(0.858)K(0.142)	3	-1.2637	4.67301e+06	3.70326e+06	-0.335557	46096000	2.75021e+07	0.7451
sp|P61978|HNRPK_HUMAN	405	>sp|P61978|HNRPK_HUMAN Heterogeneous nuclear ribonucleoprotein K OS=Homo sapiens OX=9606 GN=HNRNPK PE=1 SV=1	7.0704e-15	1	K	DLAGSIIGK(1)GGQR	2	-0.88101	5.31572e+07	5.38016e+07	0.0173845	72769000	4.34864e+07	0.742758
sp|O15031|PLXB2_HUMAN	1560	>sp|O15031|PLXB2_HUMAN Plexin-B2 OS=Homo sapiens OX=9606 GN=PLXNB2 PE=1 SV=3	8.73904e-19	1	K	DGATLILSK(1)VGVSQQPEDSQQDLPGER	3	0.80907	5.77781e+06	6.73858e+06	0.221922	8420100	5.03531e+06	0.741757
sp|Q8N6U8|GP161_HUMAN	441	>sp|Q8N6U8|GP161_HUMAN G-protein coupled receptor 161 OS=Homo sapiens OX=9606 GN=GPR161 PE=2 SV=1	1.39378e-18	1	K	SSVTFEDEVEQIK(0.995)EAAK(0.005)	3	0.48118	1	1	0	36940000	2.20946e+07	0.741493
sp|P21399|ACOC_HUMAN	396	>sp|P21399|ACOC_HUMAN Cytoplasmic aconitate hydratase OS=Homo sapiens OX=9606 GN=ACO1 PE=1 SV=3	0.0139653	1	K	KDFESCLGAK(0.989)QGFK(0.011)	3	-1.0001	3.8462e+06	3.57813e+06	-0.104227	2997500	1.79347e+06	0.741005
sp|Q86YV9|HPS6_HUMAN	534	>sp|Q86YV9|HPS6_HUMAN Hermansky-Pudlak syndrome 6 protein OS=Homo sapiens OX=9606 GN=HPS6 PE=1 SV=1	0.000287843	1	K	ALQLQLDGNGK(1)LR	3	-1.6426	2.86613e+07	1.89084e+07	-0.600079	178760	107016	0.740203
sp|P52569|CTR2_HUMAN	632	>sp|P52569|CTR2_HUMAN Cationic amino acid transporter 2 OS=Homo sapiens OX=9606 GN=SLC7A2 PE=1 SV=2	1.2197e-103	1	K	HSLEGHLRDENNEEDAYPDNVHAAAEEK(1)SAIQANDHHPR	6	-0.16017	1	2.269e+07	24.4356	573780000	3.43504e+08	0.740169
sp|Q15154|PCM1_HUMAN	1198	>sp|Q15154|PCM1_HUMAN Pericentriolar material 1 protein OS=Homo sapiens OX=9606 GN=PCM1 PE=1 SV=4	1.35057e-08	1	K	K(1)LPEEEVESSR	3	-0.39216	1.31849e+08	1.33784e+08	0.0210108	49610000	2.9703e+07	0.740022
sp|Q5JTV8|TOIP1_HUMAN	76	>sp|Q5JTV8|TOIP1_HUMAN Torsin-1A-interacting protein 1 OS=Homo sapiens OX=9606 GN=TOR1AIP1 PE=1 SV=2	1.63077e-09	1	K	FSDEPPEVYGDFEPLVAK(1)ER	3	-0.75974	1	2.71076e+06	21.3703	19439000	1.16457e+07	0.739155
sp|P62191|PRS4_HUMAN	91	>sp|P62191|PRS4_HUMAN 26S proteasome regulatory subunit 4 OS=Homo sapiens OX=9606 GN=PSMC1 PE=1 SV=1	1.35215e-05	1	K	NQEQMKPLEEK(1)QEEER	3	0.74974	2.11572e+07	1.75778e+07	-0.267393	13596000	8.14773e+06	0.738711
sp|Q9UPN4|CP131_HUMAN	320	>sp|Q9UPN4|CP131_HUMAN Centrosomal protein of 131 kDa OS=Homo sapiens OX=9606 GN=CEP131 PE=1 SV=3	0.000152061	1	K	SGEGTLLDLHQQK(1)EAAR	3	0.21121	1	4.86905e+06	22.2152	10160000	6.10277e+06	0.735365
sp|Q8N488|RYBP_HUMAN	119	>sp|Q8N488|RYBP_HUMAN RING1 and YY1-binding protein OS=Homo sapiens OX=9606 GN=RYBP PE=1 SV=2	3.96843e-10	1	K	SDILK(1)DPPSEANSIQSANATTK	3	2.4999	1.1691e+07	1.05949e+07	-0.142031	10009000	6.02297e+06	0.732752
sp|Q15843|NEDD8_HUMAN	11	>sp|Q15843|NEDD8_HUMAN NEDD8 OS=Homo sapiens OX=9606 GN=NEDD8 PE=1 SV=1	1.46868e-74	1	K	TLTGK(1)EIEIDIEPTDKVER	3	0.12936	1.15735e+08	8.80126e+07	-0.395046	53848000	3.24392e+07	0.731156
sp|P53985|MOT1_HUMAN	462	>sp|P53985|MOT1_HUMAN Monocarboxylate transporter 1 OS=Homo sapiens OX=9606 GN=SLC16A1 PE=1 SV=3	1.67464e-138	1;2	K	ESK(1)EEETSIDVAGKPNEVTK	2	0.85721	2.67081e+08	1.68925e+08	-0.660896	216470000	1.30514e+08	0.729959
sp|Q9UHP3|UBP25_HUMAN	312	>sp|Q9UHP3|UBP25_HUMAN Ubiquitin carboxyl-terminal hydrolase 25 OS=Homo sapiens OX=9606 GN=USP25 PE=1 SV=4	3.98452e-05	1	K	FLAVGVLEGK(0.919)K(0.081)	2	-0.1181	5.05448e+07	2.37757e+07	-1.08808	5309700	3.20884e+06	0.726577
sp|P50990|TCPQ_HUMAN	62	>sp|P50990|TCPQ_HUMAN T-complex protein 1 subunit theta OS=Homo sapiens OX=9606 GN=CCT8 PE=1 SV=4	1.26824e-51	1	K	MVINHLEK(1)LFVTNDAATILR	3	-1.0797	7.41078e+07	1.04817e+07	-2.82176	19914000	1.20737e+07	0.721918
sp|P51114|FXR1_HUMAN	246	>sp|P51114|FXR1_HUMAN Fragile X mental retardation syndrome-related protein 1 OS=Homo sapiens OX=9606 GN=FXR1 PE=1 SV=3	0.00052887	1	K	K(1)VPGVTAIELDEDTGTFR	3	0.53771	5.06204e+06	6.84622e+06	0.435587	14674000	8.90687e+06	0.720272
sp|P08670|VIME_HUMAN	282	>sp|P08670|VIME_HUMAN Vimentin OS=Homo sapiens OX=9606 GN=VIM PE=1 SV=4	6.46573e-05	1	K	QQYESVAAK(1)NLQEAEEWYK	3	-0.69336	1	7.97074e+06	22.9263	28814000	1.75266e+07	0.717227
sp|P62937|PPIA_HUMAN	82	>sp|P62937|PPIA_HUMAN Peptidyl-prolyl cis-trans isomerase A OS=Homo sapiens OX=9606 GN=PPIA PE=1 SV=2	3.30846e-16	1	K	SIYGEK(1)FEDENFILK	3	0.32857	8.62968e+07	7.78356e+07	-0.148877	126840000	7.72503e+07	0.715397
sp|O95816|BAG2_HUMAN	111	>sp|O95816|BAG2_HUMAN BAG family molecular chaperone regulator 2 OS=Homo sapiens OX=9606 GN=BAG2 PE=1 SV=1	4.60797e-07	1	K	TLTVEVSVETIRNPQQQESLK(1)HATR	4	-0.69852	1	1.87859e+07	24.1631	248520	151692	0.712214
sp|Q8NE00|TM104_HUMAN	109	>sp|Q8NE00|TM104_HUMAN Transmembrane protein 104 OS=Homo sapiens OX=9606 GN=TMEM104 PE=1 SV=2	0.000288142	1	K	AEK(1)RPILSVQR	3	0.53576	1.21419e+08	2.1659e+06	-5.80888	61739000	3.76915e+07	0.711943
sp|P78527|PRKDC_HUMAN	3355	>sp|P78527|PRKDC_HUMAN DNA-dependent protein kinase catalytic subunit OS=Homo sapiens OX=9606 GN=PRKDC PE=1 SV=3	2.53024e-53	1	K	IIANALSSEPACLAEIEEDK(1)AR	3	1.5435	2.34888e+07	2.28753e+07	-0.0381835	8555500	5.23218e+06	0.70944
sp|P20700|LMNB1_HUMAN	124	>sp|P20700|LMNB1_HUMAN Lamin-B1 OS=Homo sapiens OX=9606 GN=LMNB1 PE=1 SV=2	0.000681033	1	K	AEHDQLLLNYAK(0.143)K(0.857)	3	0.6591	7.15623e+06	1.81582e+07	1.34335	20098000	1.22913e+07	0.709412
sp|Q9Y224|RTRAF_HUMAN	115	>sp|Q9Y224|RTRAF_HUMAN RNA transcription, translation and transport factor protein OS=Homo sapiens OX=9606 GN=RTRAF PE=1 SV=1	1.35603e-05	1	K	TADNATK(1)NAEPLINLDVNNPDFK	3	2.0367	7.32476e+06	7.07466e+06	-0.0501209	21205000	1.30038e+07	0.705474
sp|P62888|RL30_HUMAN	32	>sp|P62888|RL30_HUMAN 60S ribosomal protein L30 OS=Homo sapiens OX=9606 GN=RPL30 PE=1 SV=2	0.000317281	1	K	YVLGYK(1)QTLK	3	0.42885	3.99712e+07	3.14944e+07	-0.343868	177580000	1.08966e+08	0.704591
sp|Q04656|ATP7A_HUMAN	333	>sp|Q04656|ATP7A_HUMAN Copper-transporting ATPase 1 OS=Homo sapiens OX=9606 GN=ATP7A PE=1 SV=3	0.000442052	1	K	K(1)AIEAVSPGLYR	3	0.2628	1	1	0	25130000	1.5421e+07	0.704517
sp|Q96J02|ITCH_HUMAN	432	>sp|Q96J02|ITCH_HUMAN E3 ubiquitin-protein ligase Itchy homolog OS=Homo sapiens OX=9606 GN=ITCH PE=1 SV=2	1.74992e-48	1	K	FIYGNQDLFATSQSK(1)EFDPLGPLPPGWEK	3	0.24644	7.45327e+07	6.04286e+07	-0.302644	63586000	3.9026e+07	0.704274
sp|P33121|ACSL1_HUMAN	532	>sp|P33121|ACSL1_HUMAN Long-chain-fatty-acid--CoA ligase 1 OS=Homo sapiens OX=9606 GN=ACSL1 PE=1 SV=1	2.27075e-53	1	K	TAEALDK(1)DGWLHTGDIGK	3	0.5064	4.65671e+06	2.80276e+06	-0.732464	143480000	8.82609e+07	0.701003
sp|Q49A26|GLYR1_HUMAN	335	>sp|Q49A26|GLYR1_HUMAN Putative oxidoreductase GLYR1 OS=Homo sapiens OX=9606 GN=GLYR1 PE=1 SV=3	1.3532e-11	1	K	TPAEVVSTCDITFACVSDPK(0.921)AAK(0.079)	3	-1.7049	1	1	0	69139000	4.25491e+07	0.70037
sp|Q9NUE0|ZDH18_HUMAN	163	>sp|Q9NUE0|ZDH18_HUMAN Palmitoyltransferase ZDHHC18 OS=Homo sapiens OX=9606 GN=ZDHHC18 PE=1 SV=2	5.46192e-06	1	K	ATVCEAAALEK(1)QIDNTGSSTYRPPPR	4	-0.1875	1.78171e+07	1	-24.0868	21597000	1.33007e+07	0.699326
sp|Q15043|S39AE_HUMAN	297	>sp|Q15043|S39AE_HUMAN Zinc transporter ZIP14 OS=Homo sapiens OX=9606 GN=SLC39A14 PE=1 SV=3	2.40684e-57	1	K	LQNGDLDHMIPQHCSSELDGK(1)APMVDEK	4	0.019326	6.36259e+07	4.35072e+07	-0.548359	45962000	2.83087e+07	0.699199
sp|P62424|RL7A_HUMAN	75	>sp|P62424|RL7A_HUMAN 60S ribosomal protein L7a OS=Homo sapiens OX=9606 GN=RPL7A PE=1 SV=2	3.55735e-08	1	K	LK(1)VPPAINQFTQALDR	3	-0.28714	3.81927e+07	3.81923e+07	-1.55976e-05	2837000	1.74923e+06	0.697643
sp|Q9UDY4|DNJB4_HUMAN	59	>sp|Q9UDY4|DNJB4_HUMAN DnaJ homolog subfamily B member 4 OS=Homo sapiens OX=9606 GN=DNAJB4 PE=1 SV=1	0.00486796	1	K	EVAEAYEVLSDPK(0.5)K(0.5)R	3	-0.40717	8.34675e+06	6.94511e+06	-0.265217	5388300	3.33093e+06	0.693907
sp|Q9UDY4|DNJB4_HUMAN	60	>sp|Q9UDY4|DNJB4_HUMAN DnaJ homolog subfamily B member 4 OS=Homo sapiens OX=9606 GN=DNAJB4 PE=1 SV=1	0.00486796	1	K	EVAEAYEVLSDPK(0.5)K(0.5)R	3	-0.40717	8.34675e+06	6.94511e+06	-0.265217	5388300	3.33093e+06	0.693907
sp|O43795|MYO1B_HUMAN	241	>sp|O43795|MYO1B_HUMAN Unconventional myosin-Ib OS=Homo sapiens OX=9606 GN=MYO1B PE=1 SV=3	0.000358192	1	K	YNYLSLDSAK(1)VNGVDDAANFR	3	-3.0032	1	1	0	7347300	4.54723e+06	0.692228
sp|O14908|GIPC1_HUMAN	80	>sp|O14908|GIPC1_HUMAN PDZ domain-containing protein GIPC1 OS=Homo sapiens OX=9606 GN=GIPC1 PE=1 SV=2	0.00030176	1	K	IEGFTNVK(1)ELYGK	3	-0.15091	2.97252e+07	2.46833e+07	-0.268153	32120000	1.99242e+07	0.68895
sp|P55011|S12A2_HUMAN	995	>sp|P55011|S12A2_HUMAN Solute carrier family 12 member 2 OS=Homo sapiens OX=9606 GN=SLC12A2 PE=1 SV=1	0.000193241	1	K	ESK(1)GPIVPLNVADQK	2	-0.089346	1.89537e+08	1.40719e+08	-0.429661	26380000	1.63644e+07	0.688885
sp|Q13443|ADAM9_HUMAN	741	>sp|Q13443|ADAM9_HUMAN Disintegrin and metalloproteinase domain-containing protein 9 OS=Homo sapiens OX=9606 GN=ADAM9 PE=1 SV=1	1.89772e-84	1	K	SQTYESDGK(1)NQANPSRQPGSVPR	4	-0.50926	2.19475e+07	1.64541e+07	-0.415607	7978700	4.95637e+06	0.686871
sp|O95785|WIZ_HUMAN	1597	>sp|O95785|WIZ_HUMAN Protein Wiz OS=Homo sapiens OX=9606 GN=WIZ PE=1 SV=2	3.92267e-17	1	K	FVGNIYTLK(1)CR	3	0.37872	6.33363e+07	5.44952e+07	-0.216904	235040000	1.46095e+08	0.685996
sp|O60716|CTND1_HUMAN	882	>sp|O60716|CTND1_HUMAN Catenin delta-1 OS=Homo sapiens OX=9606 GN=CTNND1 PE=1 SV=1	0.000436534	1	K	SDK(0.416)K(0.584)PDREEIQMSNMGSNTK	4	-1.1934	1	5.39735e+07	25.6857	10321000	6.41781e+06	0.68543
sp|P26038|MOES_HUMAN	464	>sp|P26038|MOES_HUMAN Moesin OS=Homo sapiens OX=9606 GN=MSN PE=1 SV=3	8.50014e-30	1	K	AELK(1)TAMSTPHVAEPAENEQDEQDENGAEASADLR	4	0.080289	5.72076e+07	1.76221e+07	-1.69882	48039000	2.98814e+07	0.684957
sp|O43148|MCES_HUMAN	163	>sp|O43148|MCES_HUMAN mRNA cap guanine-N7 methyltransferase OS=Homo sapiens OX=9606 GN=RNMT PE=1 SV=1	1.4255e-05	1	K	NLEEGHSSTVAAHYNELQEVGLEK(1)R	4	-0.94935	1	1	0	23266000	1.44812e+07	0.68404
sp|Q93096|TP4A1_HUMAN	15	>sp|Q93096|TP4A1_HUMAN Protein tyrosine phosphatase type IVA 1 OS=Homo sapiens OX=9606 GN=PTP4A1 PE=1 SV=2	0.0062178	1	K	MNRPAPVEVTYK(1)NMR	3	-1.0854	1	1	0	8629400	5.38714e+06	0.679742
sp|P04843|RPN1_HUMAN	538	>sp|P04843|RPN1_HUMAN Dolichyl-diphosphooligosaccharide--protein glycosyltransferase subunit 1 OS=Homo sapiens OX=9606 GN=RPN1 PE=1 SV=1	2.60855e-09	1	K	LK(1)TEGSDLCDR	3	-1.4285	2.78477e+07	5.72921e+07	1.04078	22947000	1.43492e+07	0.677331
sp|O15427|MOT4_HUMAN	431	>sp|O15427|MOT4_HUMAN Monocarboxylate transporter 4 OS=Homo sapiens OX=9606 GN=SLC16A3 PE=1 SV=1	1.10597e-14	1	K	LHK(1)PPADSGVDLR	3	0.70436	2.31278e+08	3.42481e+08	0.566392	49338000	3.08529e+07	0.677291
sp|Q0VAQ4|SMAGP_HUMAN	92	>sp|Q0VAQ4|SMAGP_HUMAN Small cell adhesion glycoprotein OS=Homo sapiens OX=9606 GN=SMAGP PE=1 SV=1	0.0161569	1	K	GSEK(1)EEYFI	2	-1.123	5.16014e+08	2.14007e+08	-1.26975	45981000	2.88329e+07	0.673322
sp|O75608|LYPA1_HUMAN	224	>sp|O75608|LYPA1_HUMAN Acyl-protein thioesterase 1 OS=Homo sapiens OX=9606 GN=LYPLA1 PE=1 SV=1	0.00141315	1	K	QFIDK(1)LLPPID	2	0.55315	1	1	0	8181800	5.14175e+06	0.670159
sp|P62820|RAB1A_HUMAN	187	>sp|P62820|RAB1A_HUMAN Ras-related protein Rab-1A OS=Homo sapiens OX=9606 GN=RAB1A PE=1 SV=3	1.2691e-06	1	K	MGPGATAGGAEK(0.961)SNVK(0.039)	3	-0.62145	2.8884e+07	2.26952e+07	-0.347883	18971000	1.19257e+07	0.669724
sp|Q14254|FLOT2_HUMAN	160	>sp|Q14254|FLOT2_HUMAN Flotillin-2 OS=Homo sapiens OX=9606 GN=FLOT2 PE=1 SV=2	7.27091e-07	1	K	DVYDK(1)VDYLSSLGK	3	-0.72376	2.03131e+06	1.96143e+06	-0.0505054	45756000	2.87706e+07	0.669366
sp|P20020|AT2B1_HUMAN	634	>sp|P20020|AT2B1_HUMAN Plasma membrane calcium-transporting ATPase 1 OS=Homo sapiens OX=9606 GN=ATP2B1 PE=1 SV=3	4.53635e-06	1	K	DRDDIVK(1)TVIEPMASEGLR	3	0.73064	1.15277e+07	1.04343e+07	-0.143764	23296000	1.46548e+07	0.668714
sp|Q9P2K1|C2D2A_HUMAN	958	>sp|Q9P2K1|C2D2A_HUMAN Coiled-coil and C2 domain-containing protein 2A OS=Homo sapiens OX=9606 GN=CC2D2A PE=1 SV=3	0.000134731	1	K	NVIETK(1)EHIDTHR	3	-1.048	7.85744e+06	1.02694e+07	0.386217	2815200	1.77172e+06	0.668087
sp|O43175|SERA_HUMAN	21	>sp|O43175|SERA_HUMAN D-3-phosphoglycerate dehydrogenase OS=Homo sapiens OX=9606 GN=PHGDH PE=1 SV=4	6.02762e-19	1	K	K(1)ILQDGGLQVVEK	3	-0.083743	6.90328e+07	5.64514e+07	-0.290273	57328000	3.61432e+07	0.665517
sp|P38435|VKGC_HUMAN	21	>sp|P38435|VKGC_HUMAN Vitamin K-dependent gamma-carboxylase OS=Homo sapiens OX=9606 GN=GGCX PE=1 SV=2	0.000296134	1	K	DK(1)AELISGPR	2	0.5835	2.84808e+07	3.50877e+07	0.300977	41600000	2.62568e+07	0.66389
sp|P46736|BRCC3_HUMAN	51	>sp|P46736|BRCC3_HUMAN Lys-63-specific deubiquitinase BRCC36 OS=Homo sapiens OX=9606 GN=BRCC3 PE=1 SV=2	1.25013e-07	1	K	SDSK(1)FAYTGTEMR	3	-1.3121	4.33929e+07	4.43727e+07	0.032212	36683000	2.31724e+07	0.662704
sp|Q9H7N4|SFR19_HUMAN	55	>sp|Q9H7N4|SFR19_HUMAN Splicing factor, arginine/serine-rich 19 OS=Homo sapiens OX=9606 GN=SCAF1 PE=1 SV=3	1.28256e-07	1	K	AIQQAVGSSLQGDLPNDK(1)DGSR	3	0.21426	1	1	0	40826000	2.57961e+07	0.662334
sp|P35998|PRS7_HUMAN	116	>sp|P35998|PRS7_HUMAN 26S proteasome regulatory subunit 7 OS=Homo sapiens OX=9606 GN=PSMC2 PE=1 SV=3	3.48759e-05	1	K	YIINVK(1)QFAK	3	-0.15964	1.13706e+07	1.38075e+07	0.280136	13039000	8.25381e+06	0.659702
sp|Q86YT6|MIB1_HUMAN	421	>sp|Q86YT6|MIB1_HUMAN E3 ubiquitin-protein ligase MIB1 OS=Homo sapiens OX=9606 GN=MIB1 PE=1 SV=1	2.76502e-12	1	K	K(1)LFETQESGDLNEELVK	3	-0.00053743	3.14731e+07	3.35164e+07	0.0907476	99751000	6.31675e+07	0.65915
sp|P17980|PRS6A_HUMAN	53	>sp|P17980|PRS6A_HUMAN 26S proteasome regulatory subunit 6A OS=Homo sapiens OX=9606 GN=PSMC3 PE=1 SV=3	0.00018514	1	K	LLDSEIK(1)IMK	2	0.22143	8.50422e+06	6.29147e+06	-0.434782	14823000	9.40387e+06	0.65651
sp|P53985|MOT1_HUMAN	239	>sp|P53985|MOT1_HUMAN Monocarboxylate transporter 1 OS=Homo sapiens OX=9606 GN=SLC16A1 PE=1 SV=3	2.88898e-36	1	K	DLHDANTDLIGRHPK(0.999)QEK(0.001)	4	-0.14001	3.37989e+07	5.97082e+07	0.820955	150030000	9.52644e+07	0.655241
sp|P09651|ROA1_HUMAN;sp|Q32P51|RA1L2_HUMAN	52;52	>sp|P09651|ROA1_HUMAN Heterogeneous nuclear ribonucleoprotein A1 OS=Homo sapiens OX=9606 GN=HNRNPA1 PE=1 SV=5;>sp|Q32P51|RA1L2_HUMAN Heterogeneous nuclear ribonucleoprotein A1-like 2 OS=Homo sapiens OX=9606 GN=HNRNPA1L2 PE=2 SV=2	4.1425e-10	1	K	SHFEQWGTLTDCVVMRDPNTK(1)R	4	0.92274	1.4605e+07	3.56908e+07	1.28909	16551000	1.05113e+07	0.654979
sp|P00533|EGFR_HUMAN	1061	>sp|P00533|EGFR_HUMAN Epidermal growth factor receptor OS=Homo sapiens OX=9606 GN=EGFR PE=1 SV=2	5.58628e-06	1	K	NGLQSCPIK(1)EDSFLQR	3	-0.75132	3.72249e+07	2.52688e+07	-0.558912	6390500	4.05951e+06	0.654624
sp|Q96DX7|TRI44_HUMAN	231	>sp|Q96DX7|TRI44_HUMAN Tripartite motif-containing protein 44 OS=Homo sapiens OX=9606 GN=TRIM44 PE=1 SV=1	0.00380317	1	K	DSGGLK(1)AAMIELVER	3	-0.75822	1.60458e+07	1	-23.9357	8441300	5.36526e+06	0.653817
sp|P23396|RS3_HUMAN	214	>sp|P23396|RS3_HUMAN 40S ribosomal protein S3 OS=Homo sapiens OX=9606 GN=RPS3 PE=1 SV=2	4.21106e-93	1	K	KPLPDHVSIVEPK(1)DEILPTTPISEQK	3	-0.38089	6.92482e+08	4.16252e+08	-0.73432	5166800000	3.28571e+09	0.653066
sp|Q96G74|OTUD5_HUMAN	386	>sp|Q96G74|OTUD5_HUMAN OTU domain-containing protein 5 OS=Homo sapiens OX=9606 GN=OTUD5 PE=1 SV=1	2.06004e-47	1	K	TSEESWIEQQMLEDK(0.405)K(0.595)R	3	-1.6354	5.75846e+06	1	-22.4573	59180000	3.76365e+07	0.652977
sp|P63104|1433Z_HUMAN	27	>sp|P63104|1433Z_HUMAN 14-3-3 protein zeta/delta OS=Homo sapiens OX=9606 GN=YWHAZ PE=1 SV=1	4.76927e-22	1	K	YDDMAACMK(1)SVTEQGAELSNEER	3	-0.31749	1	1	0	8805400	5.60234e+06	0.652359
sp|O15155|BET1_HUMAN	62	>sp|O15155|BET1_HUMAN BET1 homolog OS=Homo sapiens OX=9606 GN=BET1 PE=1 SV=1	0.000500289	1	K	TQNK(1)LLAEMDSQFDSTTGFLGK	3	0.29972	2.91154e+06	3.03419e+06	0.0595292	4606000	2.93119e+06	0.652026
sp|P07910|HNRPC_HUMAN	243	>sp|P07910|HNRPC_HUMAN Heterogeneous nuclear ribonucleoproteins C1/C2 OS=Homo sapiens OX=9606 GN=HNRNPC PE=1 SV=4	3.02144e-09	1	K	NDKSEEEQSSSSVK(0.815)K(0.182)DETNVK(0.003)	4	0.22815	2.71258e+07	3.33086e+07	0.296225	4788500	3.05108e+06	0.650255
sp|Q96BN8|OTUL_HUMAN	66	>sp|Q96BN8|OTUL_HUMAN Ubiquitin thioesterase otulin OS=Homo sapiens OX=9606 GN=OTULIN PE=1 SV=3	1.85292e-11	1	K	AADEIEK(0.008)EK(0.992)ELLIHER	3	1.6282	7.787e+07	8.70752e+07	0.161195	167080000	1.06527e+08	0.649323
sp|P45974|UBP5_HUMAN	793	>sp|P45974|UBP5_HUMAN Ubiquitin carboxyl-terminal hydrolase 5 OS=Homo sapiens OX=9606 GN=USP5 PE=1 SV=2	2.80347e-62	1	K	SAADSISESVPVGPK(1)VR	2	0.26384	2.98329e+08	2.86481e+08	-0.0584642	349610000	2.23121e+08	0.647921
sp|P43243|MATR3_HUMAN	804	>sp|P43243|MATR3_HUMAN Matrin-3 OS=Homo sapiens OX=9606 GN=MATR3 PE=1 SV=2	4.22361e-09	1	K	TGFYCK(1)LCSLFYTNEEVAK	3	-1.8234	1	1	0	588340	375522	0.647753
sp|P62993|GRB2_HUMAN	109	>sp|P62993|GRB2_HUMAN Growth factor receptor-bound protein 2 OS=Homo sapiens OX=9606 GN=GRB2 PE=1 SV=1	0.000223207	1	K	FGNDVQHFK(1)VLR	3	-0.10674	1.58887e+07	1.20355e+07	-0.400702	40596000	2.59134e+07	0.647637
sp|Q658P3|STEA3_HUMAN	484	>sp|Q658P3|STEA3_HUMAN Metalloreductase STEAP3 OS=Homo sapiens OX=9606 GN=STEAP3 PE=1 SV=2	2.49456e-08	1;2	K	FTLPTDHALAEK(1)TSHV	4	0.088029	1.54317e+08	9.57622e+07	-0.688364	174760000	1.11702e+08	0.645718
sp|P48739|PIPNB_HUMAN	86	>sp|P48739|PIPNB_HUMAN Phosphatidylinositol transfer protein beta isoform OS=Homo sapiens OX=9606 GN=PITPNB PE=1 SV=2	2.7272e-13	1	K	MIAPEGSLVFHEK(1)AWNAYPYCR	4	-0.64157	1.98299e+07	2.16322e+07	0.125503	22168000	1.41904e+07	0.643566
sp|P48029|SC6A8_HUMAN	18	>sp|P48029|SC6A8_HUMAN Sodium- and chloride-dependent creatine transporter 1 OS=Homo sapiens OX=9606 GN=SLC6A8 PE=1 SV=1	6.4172e-10	1	K	K(0.001)SAENGIYSVSGDEK(0.946)K(0.054)	3	-1.3573	4.30916e+07	1	-25.3609	183800000	1.17712e+08	0.642873
sp|Q9Y6Y8|S23IP_HUMAN	931	>sp|Q9Y6Y8|S23IP_HUMAN SEC23-interacting protein OS=Homo sapiens OX=9606 GN=SEC23IP PE=1 SV=1	0.000742933	1	K	VVESPDFSK(1)DEDYLGK	3	0.45404	1.92768e+07	1.57822e+07	-0.288572	11861000	7.59647e+06	0.642825
sp|P26038|MOES_HUMAN	165	>sp|P26038|MOES_HUMAN Moesin OS=Homo sapiens OX=9606 GN=MSN PE=1 SV=3	1.71266e-22	1	K	LNK(1)DQWEER	2	0.045114	1.28971e+07	1.54169e+07	0.257467	57224000	3.67456e+07	0.639047
sp|O75915|PRAF3_HUMAN	185	>sp|O75915|PRAF3_HUMAN PRA1 family protein 3 OS=Homo sapiens OX=9606 GN=ARL6IP5 PE=1 SV=1	0.0166712	1	K	LTDYISK(0.966)VK(0.034)E	2	-0.50477	7.22405e+06	8.6712e+06	0.263423	10487000	6.7342e+06	0.639024
sp|Q13433|S39A6_HUMAN	472	>sp|Q13433|S39A6_HUMAN Zinc transporter ZIP6 OS=Homo sapiens OX=9606 GN=SLC39A6 PE=1 SV=3	1.41626e-08	1	K	QLSK(1)YESQLSTNEEKVDTDDRTEGYLR	5	-0.42446	1	1	0	20907000	1.34425e+07	0.637186
sp|P06493|CDK1_HUMAN	139	>sp|P06493|CDK1_HUMAN Cyclin-dependent kinase 1 OS=Homo sapiens OX=9606 GN=CDK1 PE=1 SV=3	1.82795e-11	1	K	DLKPQNLLIDDK(0.999)GTIK(0.001)	3	0.40971	3.4528e+07	2.73104e+07	-0.338319	5159300	3.31895e+06	0.636449
sp|P05023|AT1A1_HUMAN;sp|P13637|AT1A3_HUMAN;sp|P50993|AT1A2_HUMAN;sp|Q13733|AT1A4_HUMAN	377;367;375;385	>sp|P05023|AT1A1_HUMAN Sodium/potassium-transporting ATPase subunit alpha-1 OS=Homo sapiens OX=9606 GN=ATP1A1 PE=1 SV=1;>sp|P13637|AT1A3_HUMAN Sodium/potassium-transporting ATPase subunit alpha-3 OS=Homo sapiens OX=9606 GN=ATP1A3 PE=1 SV=3;>sp|P50993|AT1A2	4.98041e-93	1	K	NLEAVETLGSTSTICSDK(1)TGTLTQNR	3	-1.8843	1	1	0	19569000	1.25944e+07	0.635789
sp|Q99755|PI51A_HUMAN	103	>sp|Q99755|PI51A_HUMAN Phosphatidylinositol 4-phosphate 5-kinase type-1 alpha OS=Homo sapiens OX=9606 GN=PIP5K1A PE=1 SV=1	5.86519e-138	1	K	GAIQLGITHTVGSLSTK(1)PER	3	-0.14956	1.64868e+09	1.10806e+09	-0.573283	1591800000	1.02544e+09	0.634414
sp|Q9Y5S1|TRPV2_HUMAN	62	>sp|Q9Y5S1|TRPV2_HUMAN Transient receptor potential cation channel subfamily V member 2 OS=Homo sapiens OX=9606 GN=TRPV2 PE=1 SV=1	3.62652e-25	1	K	K(1)GTGASQPDPNRFDRDR	4	-0.21867	1.80135e+06	1	-20.7807	33325000	2.14701e+07	0.634277
sp|P62888|RL30_HUMAN	26	>sp|P62888|RL30_HUMAN 60S ribosomal protein L30 OS=Homo sapiens OX=9606 GN=RPL30 PE=1 SV=2	0.026782	1	K	SGK(1)YVLGYK	2	-0.20304	1	1.30738e+07	23.6402	30724000	1.98032e+07	0.633631
sp|Q14667|K0100_HUMAN	555	>sp|Q14667|K0100_HUMAN Protein KIAA0100 OS=Homo sapiens OX=9606 GN=KIAA0100 PE=1 SV=3	4.39813e-06	1	K	ILSLMGPQSGK(1)SAVSR	3	2.0429	3.36068e+07	3.66128e+07	0.123596	1769700	1.14419e+06	0.629181
sp|P46736|BRCC3_HUMAN	180	>sp|P46736|BRCC3_HUMAN Lys-63-specific deubiquitinase BRCC36 OS=Homo sapiens OX=9606 GN=BRCC3 PE=1 SV=2	0.000127668	1	K	VLYTCFQSIQAQK(1)SSESLHGPR	4	-0.18907	1.64403e+07	1	-23.9707	9991900	6.46034e+06	0.62915
sp|P60866|RS20_HUMAN	8	>sp|P60866|RS20_HUMAN 40S ribosomal protein S20 OS=Homo sapiens OX=9606 GN=RPS20 PE=1 SV=1	1.4519e-53	1	K	DTGK(1)TPVEPEVAIHR	3	1.299	1.03418e+09	8.23798e+08	-0.328128	1408200000	9.10936e+08	0.628431
sp|Q9Y5Y0|FLVC1_HUMAN	530	>sp|Q9Y5Y0|FLVC1_HUMAN Feline leukemia virus subgroup C receptor-related protein 1 OS=Homo sapiens OX=9606 GN=FLVCR1 PE=1 SV=1	1.34014e-10	1	K	HNINIGITNVDVK(1)AIPADSPTDQEPK	4	1.3439	1.125e+07	1	-23.4234	28936000	1.87205e+07	0.628247
sp|P23458|JAK1_HUMAN	924	>sp|P23458|JAK1_HUMAN Tyrosine-protein kinase JAK1 OS=Homo sapiens OX=9606 GN=JAK1 PE=1 SV=2	0.00609925	1	K	K(1)EIEILR	2	1.7286	1	2.40494e+07	24.5195	18914000	1.22437e+07	0.62742
sp|P49790|NU153_HUMAN	973	>sp|P49790|NU153_HUMAN Nuclear pore complex protein Nup153 OS=Homo sapiens OX=9606 GN=NUP153 PE=1 SV=2	0.00889826	1	K	FGVSSESK(0.038)PEEVK(0.605)K(0.358)	3	-1.6075	7.46463e+06	5.7323e+06	-0.380957	14481000	9.37564e+06	0.627172
sp|P43243|MATR3_HUMAN	836	>sp|P43243|MATR3_HUMAN Matrin-3 OS=Homo sapiens OX=9606 GN=MATR3 PE=1 SV=2	0.000904997	1	K	FLNK(1)LAEER	2	0.41441	1.78855e+07	1.95433e+07	0.127884	58797000	3.81119e+07	0.625501
sp|P14868|SYDC_HUMAN	241	>sp|P14868|SYDC_HUMAN Aspartate--tRNA ligase, cytoplasmic OS=Homo sapiens OX=9606 GN=DARS PE=1 SV=2	4.70242e-17	1	K	IISAASEGGANVFTVSYFK(1)NNAYLAQSPQLYK	3	1.4277	1	1	0	6386300	4.14102e+06	0.624995
sp|P23246|SFPQ_HUMAN	413	>sp|P23246|SFPQ_HUMAN Splicing factor, proline- and glutamine-rich OS=Homo sapiens OX=9606 GN=SFPQ PE=1 SV=2	1.00883e-05	1	K	STGK(1)GIVEFASKPAAR	3	0.11535	1	1	0	34958000	2.26787e+07	0.624285
sp|P08708|RS17_HUMAN	19	>sp|P08708|RS17_HUMAN 40S ribosomal protein S17 OS=Homo sapiens OX=9606 GN=RPS17 PE=1 SV=2	0.0327236	1	K	VIIEK(1)YYTR	2	-0.0093326	1	1	0	26672000	1.73103e+07	0.623699
sp|Q14204|DYHC1_HUMAN	3369	>sp|Q14204|DYHC1_HUMAN Cytoplasmic dynein 1 heavy chain 1 OS=Homo sapiens OX=9606 GN=DYNC1H1 PE=1 SV=5	0.00078827	1	K	K(1)NYMSNPSYNYEIVNR	3	0.15803	1.8277e+07	1	-24.1235	7027600	4.56433e+06	0.622628
sp|Q14534|ERG1_HUMAN	436	>sp|Q14534|ERG1_HUMAN Squalene monooxygenase OS=Homo sapiens OX=9606 GN=SQLE PE=1 SV=3	0.000136421	1	K	LLK(1)GIPDLYDDAAIFEAK	3	1.3343	1	1	0	1939300	1.25981e+06	0.622335
sp|P54727|RD23B_HUMAN	14	>sp|P54727|RD23B_HUMAN UV excision repair protein RAD23 homolog B OS=Homo sapiens OX=9606 GN=RAD23B PE=1 SV=1	0.000339244	1	K	TLQQQTFK(0.999)IDIDPEETVK(0.001)	3	0.84639	9.40905e+06	7.28242e+06	-0.36963	10097000	6.56653e+06	0.620723
sp|P62258|1433E_HUMAN	142	>sp|P62258|1433E_HUMAN 14-3-3 protein epsilon OS=Homo sapiens OX=9606 GN=YWHAE PE=1 SV=1	2.08856e-58	1	K	K(1)EAAENSLVAYK	2	-0.32037	8.75412e+07	7.90241e+07	-0.147669	60791000	3.95539e+07	0.620038
sp|Q8NBI5|S43A3_HUMAN	249	>sp|Q8NBI5|S43A3_HUMAN Solute carrier family 43 member 3 OS=Homo sapiens OX=9606 GN=SLC43A3 PE=1 SV=2	1.94966e-63	1	K	ELQSK(1)EFLSAKEETPGAGQK	4	0.64661	1	2.70243e+06	21.3658	62020000	4.03641e+07	0.61966
sp|Q8IZ07|AN13A_HUMAN	257	>sp|Q8IZ07|AN13A_HUMAN Ankyrin repeat domain-containing protein 13A OS=Homo sapiens OX=9606 GN=ANKRD13A PE=1 SV=3	1.91006e-23	1	K	TDK(1)AEVVNGYEAK	2	-0.47355	4.48861e+08	4.21705e+08	-0.0900346	76056000	4.95026e+07	0.619559
sp|Q9H3S7|PTN23_HUMAN	288	>sp|Q9H3S7|PTN23_HUMAN Tyrosine-protein phosphatase non-receptor type 23 OS=Homo sapiens OX=9606 GN=PTPN23 PE=1 SV=1	1.93799e-06	1	K	LAK(1)GQPDTVQDALR	3	0.010264	1	1	0	68495000	4.46303e+07	0.617976
sp|Q7L7V1|DHX32_HUMAN	434	>sp|Q7L7V1|DHX32_HUMAN Putative pre-mRNA-splicing factor ATP-dependent RNA helicase DHX32 OS=Homo sapiens OX=9606 GN=DHX32 PE=1 SV=1	0.000804156	1	K	DMTPLKPAEMQEANLTSMVLFMK(1)R	4	-0.96882	1.34386e+06	771194	-0.801221	1314000	856482	0.617471
sp|Q13303|KCAB2_HUMAN	363	>sp|Q13303|KCAB2_HUMAN Voltage-gated potassium channel subunit beta-2 OS=Homo sapiens OX=9606 GN=KCNAB2 PE=1 SV=2	1.47288e-72	1	K	LSSSIIHEIDSILGNK(0.035)PYSK(0.165)K(0.8)	3	0.83926	1	1	0	2205800	1.43859e+06	0.616646
sp|Q9UBC2|EP15R_HUMAN	492	>sp|Q9UBC2|EP15R_HUMAN Epidermal growth factor receptor substrate 15-like 1 OS=Homo sapiens OX=9606 GN=EPS15L1 PE=1 SV=1	3.23965e-178	1	K	TQIQSQESDLK(1)SQEDDLNR	3	-0.67302	5.45951e+08	2.35709e+08	-1.21177	350800000	2.28987e+08	0.615385
sp|Q9UPY5|XCT_HUMAN	12	>sp|Q9UPY5|XCT_HUMAN Cystine/glutamate transporter OS=Homo sapiens OX=9606 GN=SLC7A11 PE=1 SV=1	7.34785e-32	1	K	KPVVSTISK(1)GGYLQGNVNGR	3	0.99106	1	1	0	79726000	5.20456e+07	0.615273
sp|P11142|HSP7C_HUMAN	325	>sp|P11142|HSP7C_HUMAN Heat shock cognate 71 kDa protein OS=Homo sapiens OX=9606 GN=HSPA8 PE=1 SV=1	5.69335e-51	1	K	DAK(1)LDKSQIHDIVLVGGSTR	3	-1.7393	2.39021e+07	885704	-4.75417	62500000	4.08224e+07	0.614496
sp|Q6NUT3|MFS12_HUMAN	269	>sp|Q6NUT3|MFS12_HUMAN Major facilitator superfamily domain-containing protein 12 OS=Homo sapiens OX=9606 GN=MFSD12 PE=1 SV=2	1.27277e-14	1	K	RPHAEEPGEHTPLLAPATAQPLLLWK(1)HWLR	6	-0.18251	1	1	0	2250500	1.47122e+06	0.613234
sp|Q96QD8|S38A2_HUMAN	59	>sp|Q96QD8|S38A2_HUMAN Sodium-coupled neutral amino acid transporter 2 OS=Homo sapiens OX=9606 GN=SLC38A2 PE=1 SV=2	4.48444e-89	1	K	SHYADVDPENQNFLLESNLGK(0.604)K(0.396)	3	0.11171	2.23667e+08	7.83028e+07	-1.51422	220040000	1.44042e+08	0.611273
sp|Q96QD8|S38A2_HUMAN	60	>sp|Q96QD8|S38A2_HUMAN Sodium-coupled neutral amino acid transporter 2 OS=Homo sapiens OX=9606 GN=SLC38A2 PE=1 SV=2	3.46908e-73	1	K	SHYADVDPENQNFLLESNLGK(0.139)K(0.861)	3	0.6827	2.23667e+08	7.83028e+07	-1.51422	220040000	1.44042e+08	0.611273
sp|Q93034|CUL5_HUMAN	724	>sp|Q93034|CUL5_HUMAN Cullin-5 OS=Homo sapiens OX=9606 GN=CUL5 PE=1 SV=4	9.86408e-23	1	K	TQEAIIQIMK(1)MR	3	0.097043	3.80778e+08	2.32437e+08	-0.712112	164470000	1.07743e+08	0.610234
sp|Q9UP95|S12A4_HUMAN	1010	>sp|Q9UP95|S12A4_HUMAN Solute carrier family 12 member 4 OS=Homo sapiens OX=9606 GN=SLC12A4 PE=1 SV=2	3.49954e-06	1	K	ELVHIK(1)PDQSNVR	3	2.6279	1.47287e+08	1.09478e+08	-0.427987	74620000	4.89135e+07	0.609329
sp|P52272|HNRPM_HUMAN	83	>sp|P52272|HNRPM_HUMAN Heterogeneous nuclear ribonucleoprotein M OS=Homo sapiens OX=9606 GN=HNRNPM PE=1 SV=3	6.3013e-07	1	K	AFITNIPFDVK(0.999)WQSLK(0.001)	3	0.68668	870376	1.0919e+06	0.327131	294440	193010	0.609301
sp|Q9GZZ1|NAA50_HUMAN	17	>sp|Q9GZZ1|NAA50_HUMAN N-alpha-acetyltransferase 50 OS=Homo sapiens OX=9606 GN=NAA50 PE=1 SV=1	5.94886e-05	1	K	IELGDVTPHNIK(0.958)QLK(0.042)	4	0.9997	2.09069e+07	3.62516e+06	-2.52786	35422000	2.32249e+07	0.60897
sp|Q9Y679|AUP1_HUMAN	425	>sp|Q9Y679|AUP1_HUMAN Ancient ubiquitous protein 1 OS=Homo sapiens OX=9606 GN=AUP1 PE=1 SV=1	7.25703e-13	1	K	GTQSLPTASASK(1)FPSSGPVTPQPTALTFAK	3	-1.4324	1	1	0	26219000	1.72039e+07	0.607874
sp|Q9BXW9|FACD2_HUMAN	561	>sp|Q9BXW9|FACD2_HUMAN Fanconi anemia group D2 protein OS=Homo sapiens OX=9606 GN=FANCD2 PE=1 SV=2	6.80918e-05	1	K	K(1)QLSSTVFK	2	-0.08137	9.63958e+07	8.79715e+07	-0.131935	35361000	2.32286e+07	0.606256
sp|Q16665|HIF1A_HUMAN	389	>sp|Q16665|HIF1A_HUMAN Hypoxia-inducible factor 1-alpha OS=Homo sapiens OX=9606 GN=HIF1A PE=1 SV=1	0.00311755	1	K	VESEDTSSLFDK(0.935)LK(0.065)	3	-0.33823	1.16396e+07	1.24883e+07	0.101532	5025500	3.30343e+06	0.605303
sp|Q08752|PPID_HUMAN	283	>sp|Q08752|PPID_HUMAN Peptidyl-prolyl cis-trans isomerase D OS=Homo sapiens OX=9606 GN=PPID PE=1 SV=3	3.28558e-27	1	K	LQPIALSCVLNIGACK(0.904)LK(0.096)	3	-0.085214	4.61e+06	786578	-2.5511	12161000	7.99437e+06	0.605206
sp|Q9UPU5|UBP24_HUMAN	1764	>sp|Q9UPU5|UBP24_HUMAN Ubiquitin carboxyl-terminal hydrolase 24 OS=Homo sapiens OX=9606 GN=USP24 PE=1 SV=3	2.94593e-05	1	K	MWNK(1)ELYVR	3	-0.15883	8.96166e+07	7.58547e+07	-0.240527	24557000	1.61444e+07	0.605098
sp|Q03252|LMNB2_HUMAN	150	>sp|Q03252|LMNB2_HUMAN Lamin-B2 OS=Homo sapiens OX=9606 GN=LMNB2 PE=1 SV=4	2.02162e-05	1	K	VK(1)DLESLFHR	3	0.61628	1.12567e+08	8.78778e+07	-0.35721	40960000	2.69387e+07	0.604533
sp|Q7Z7H5|TMED4_HUMAN	172	>sp|Q7Z7H5|TMED4_HUMAN Transmembrane emp24 domain-containing protein 4 OS=Homo sapiens OX=9606 GN=TMED4 PE=1 SV=1	1.31675e-05	1	K	QLLDQVEQIQK(1)EQDYQR	3	0.95702	7.44585e+06	9.10226e+06	0.289787	6431200	4.23133e+06	0.603978
sp|Q01082|SPTB2_HUMAN	2344	>sp|Q01082|SPTB2_HUMAN Spectrin beta chain, non-erythrocytic 1 OS=Homo sapiens OX=9606 GN=SPTBN1 PE=1 SV=2	2.4053e-08	1	K	AQTLPTSVVTITSESSPGK(1)R	3	-0.11172	3.55395e+07	9.95141e+06	-1.83645	9514200	6.26395e+06	0.603009
sp|Q9Y5K5|UCHL5_HUMAN	158	>sp|Q9Y5K5|UCHL5_HUMAN Ubiquitin carboxyl-terminal hydrolase isozyme L5 OS=Homo sapiens OX=9606 GN=UCHL5 PE=1 SV=3	4.98414e-25	1	K	TSAK(1)EEDAFHFVSYVPVNGR	3	-0.62985	1.66396e+08	1.20808e+08	-0.461912	86078000	5.66931e+07	0.602472
sp|Q99942|RNF5_HUMAN	75	>sp|Q99942|RNF5_HUMAN E3 ubiquitin-protein ligase RNF5 OS=Homo sapiens OX=9606 GN=RNF5 PE=1 SV=1	0.00921638	1	K	EK(1)VVPLYGR	2	0.030982	2.9715e+07	9.64002e+06	-1.62408	179480000	1.18332e+08	0.600986
sp|Q5T3F8|CSCL2_HUMAN	258	>sp|Q5T3F8|CSCL2_HUMAN CSC1-like protein 2 OS=Homo sapiens OX=9606 GN=TMEM63B PE=1 SV=1	1.08637e-05	1	K	K(1)HFEEAYPNCTVLEARPCYNVAR	4	-0.08543	1	1	0	29572000	1.94977e+07	0.600927
sp|P12268|IMDH2_HUMAN	242	>sp|P12268|IMDH2_HUMAN Inosine-5'-monophosphate dehydrogenase 2 OS=Homo sapiens OX=9606 GN=IMPDH2 PE=1 SV=2	9.8273e-15	1	K	K(1)QLLCGAAIGTHEDDKYR	4	-0.64618	8.22187e+06	7.51529e+06	-0.129638	72864000	4.80483e+07	0.60072
sp|P12268|IMDH2_HUMAN	124	>sp|P12268|IMDH2_HUMAN Inosine-5'-monophosphate dehydrogenase 2 OS=Homo sapiens OX=9606 GN=IMPDH2 PE=1 SV=2	9.53713e-09	1	K	KYEQGFITDPVVLSPK(1)DR	3	1.9398	3.22867e+07	8.12736e+06	-1.99008	8786500	5.80398e+06	0.598247
sp|Q96IV0|NGLY1_HUMAN	419	>sp|Q96IV0|NGLY1_HUMAN Peptide-N(4)-(N-acetyl-beta-glucosaminyl)asparagine amidase OS=Homo sapiens OX=9606 GN=NGLY1 PE=1 SV=1	6.76419e-06	1	K	DTINGLNK(1)QR	2	0.22006	7.40699e+07	4.23383e+07	-0.806925	27003000	1.78382e+07	0.598152
sp|Q15286|RAB35_HUMAN	178	>sp|Q15286|RAB35_HUMAN Ras-related protein Rab-35 OS=Homo sapiens OX=9606 GN=RAB35 PE=1 SV=1	3.98486e-17	1	K	DNLAK(1)QQQQQQNDVVK	3	-0.09683	4.14994e+07	2.61476e+07	-0.666414	14337000	9.47194e+06	0.598011
sp|O95551|TYDP2_HUMAN	24	>sp|O95551|TYDP2_HUMAN Tyrosyl-DNA phosphodiesterase 2 OS=Homo sapiens OX=9606 GN=TDP2 PE=1 SV=1	1.66046e-05	1	K	EAAEEEGEPEVK(0.416)K(0.584)	3	-0.45629	1	1.22979e+07	23.5519	15433000	1.02069e+07	0.596477
sp|P06748|NPM_HUMAN	267	>sp|P06748|NPM_HUMAN Nucleophosmin OS=Homo sapiens OX=9606 GN=NPM1 PE=1 SV=2	0.00123079	1	K	VEAK(1)FINYVK	3	0.62134	4.9884e+07	2.5701e+07	-0.956755	323070	213711	0.596185
sp|P60201|MYPR_HUMAN	122	>sp|P60201|MYPR_HUMAN Myelin proteolipid protein OS=Homo sapiens OX=9606 GN=PLP1 PE=1 SV=2	1.12993e-06	1	K	GLSATVTGGQK(1)GR	2	-0.057649	1	1	0	37863000	2.50776e+07	0.594391
sp|O95721|SNP29_HUMAN	154	>sp|O95721|SNP29_HUMAN Synaptosomal-associated protein 29 OS=Homo sapiens OX=9606 GN=SNAP29 PE=1 SV=1	0.000174286	1	K	LKEAISTSK(1)EQEAK	3	0.32368	1	1	0	18896000	1.25198e+07	0.593865
sp|Q9H0E2|TOLIP_HUMAN	146	>sp|Q9H0E2|TOLIP_HUMAN Toll-interacting protein OS=Homo sapiens OX=9606 GN=TOLLIP PE=1 SV=1	7.01201e-05	1	K	QGK(1)VEDKWYSLSGR	2	-1.1161	1	1	0	23098000	1.53049e+07	0.593776
sp|P05388|RLA0_HUMAN;sp|Q8NHW5|RLA0L_HUMAN	106;106	>sp|P05388|RLA0_HUMAN 60S acidic ribosomal protein P0 OS=Homo sapiens OX=9606 GN=RPLP0 PE=1 SV=1;>sp|Q8NHW5|RLA0L_HUMAN 60S acidic ribosomal protein P0-like OS=Homo sapiens OX=9606 GN=RPLP0P6 PE=5 SV=1	0.0092291	1	K	DMLLANK(1)VPAAAR	3	0.3527	3.01283e+06	3.55837e+06	0.240097	3124800	2.07075e+06	0.593608
sp|P20700|LMNB1_HUMAN	182	>sp|P20700|LMNB1_HUMAN Lamin-B1 OS=Homo sapiens OX=9606 GN=LMNB1 PE=1 SV=2	1.79813e-06	1	K	K(1)QLADETLLK	2	0.54568	1.11244e+08	6.13578e+07	-0.858408	200020000	1.32628e+08	0.592754
sp|Q9H2J7|S6A15_HUMAN	664	>sp|Q9H2J7|S6A15_HUMAN Sodium-dependent neutral amino acid transporter B(0)AT2 OS=Homo sapiens OX=9606 GN=SLC6A15 PE=1 SV=1	1.03842e-27	1	K	VLK(1)EPVNLEGDDTSLIHGK	3	0.13572	1.18391e+08	6.9732e+07	-0.763671	416320000	2.7683e+08	0.588694
sp|Q96H55|MYO19_HUMAN	838	>sp|Q96H55|MYO19_HUMAN Unconventional myosin-XIX OS=Homo sapiens OX=9606 GN=MYO19 PE=1 SV=2	4.03552e-05	1	K	ELDGVEEK(1)HFSQAPCSLSTSPLQTR	4	-1.9496	1	3.09223e+07	24.8821	38240000	2.54356e+07	0.588232
sp|P54725|RD23A_HUMAN	122	>sp|P54725|RD23A_HUMAN UV excision repair protein RAD23 homolog A OS=Homo sapiens OX=9606 GN=RAD23A PE=1 SV=1	8.35449e-118	1	K	EDK(1)SPSEESAPTTSPESVSGSVPSSGSSGR	3	-0.039636	1.15676e+08	9.93556e+07	-0.219411	58642000	3.90223e+07	0.587635
sp|P05023|AT1A1_HUMAN	21	>sp|P05023|AT1A1_HUMAN Sodium/potassium-transporting ATPase subunit alpha-1 OS=Homo sapiens OX=9606 GN=ATP1A1 PE=1 SV=1	6.01098e-33	1	K	DKYEPAAVSEQGDK(0.922)K(0.078)	4	0.69269	3.34088e+07	2.45505e+07	-0.444476	68214000	4.54588e+07	0.585508
sp|P46736|BRCC3_HUMAN	65	>sp|P46736|BRCC3_HUMAN Lys-63-specific deubiquitinase BRCC36 OS=Homo sapiens OX=9606 GN=BRCC3 PE=1 SV=2	0.0162872	1	K	TVAEK(1)VDAVR	2	-0.0095682	5.04778e+07	3.92049e+07	-0.364616	27090000	1.81119e+07	0.580821
sp|O14562|UBFD1_HUMAN	100	>sp|O14562|UBFD1_HUMAN Ubiquitin domain-containing protein UBFD1 OS=Homo sapiens OX=9606 GN=UBFD1 PE=1 SV=2	0.000456888	1	K	HDVK(1)FPLDSTGSELK	3	0.68163	3.86963e+07	1	-25.2057	15165000	1.01535e+07	0.578772
sp|P36957|ODO2_HUMAN	353	>sp|P36957|ODO2_HUMAN Dihydrolipoyllysine-residue succinyltransferase component of 2-oxoglutarate dehydrogenase complex, mitochondrial OS=Homo sapiens OX=9606 GN=DLST PE=1 SV=4	0.0244562	1	K	TITELGEK(1)AR	2	-0.48085	1.20334e+07	6.84848e+06	-0.813192	28381000	1.90236e+07	0.577138
sp|P15880|RS2_HUMAN	58	>sp|P15880|RS2_HUMAN 40S ribosomal protein S2 OS=Homo sapiens OX=9606 GN=RPS2 PE=1 SV=2	3.17977e-24	1	K	AEDK(1)EWMPVTK	2	-0.71805	1.30393e+08	9.08908e+07	-0.520656	157200000	1.05495e+08	0.575421
sp|Q9NVI1|FANCI_HUMAN	523	>sp|Q9NVI1|FANCI_HUMAN Fanconi anemia group I protein OS=Homo sapiens OX=9606 GN=FANCI PE=1 SV=4	4.42713e-05	1	K	K(1)AMFANQLDAR	3	-0.2159	1.61288e+07	3.45774e+06	-2.22174	110860000	7.44494e+07	0.574407
sp|Q92783|STAM1_HUMAN	171	>sp|Q92783|STAM1_HUMAN Signal transducing adapter molecule 1 OS=Homo sapiens OX=9606 GN=STAM PE=1 SV=3	4.78144e-99	1	K	DPGTVANK(0.004)K(0.996)EEEDLAK	3	-0.28837	2.72568e+07	1.80697e+07	-0.593044	126240000	8.48184e+07	0.57372
sp|P27708|PYR1_HUMAN	1657	>sp|P27708|PYR1_HUMAN CAD protein OS=Homo sapiens OX=9606 GN=CAD PE=1 SV=3	0.00225555	1	K	LGPGK(1)GEVRPELGSR	3	1.2948	1	3.81244e+07	25.1842	10268000	6.90052e+06	0.573379
sp|P23528|COF1_HUMAN	144	>sp|P23528|COF1_HUMAN Cofilin-1 OS=Homo sapiens OX=9606 GN=CFL1 PE=1 SV=3	4.77257e-16	1	K	HELQANCYEEVK(1)DR	3	0.23504	1.17393e+08	1.67495e+08	0.512769	66410000	4.46669e+07	0.572193
sp|P31431|SDC4_HUMAN	190	>sp|P31431|SDC4_HUMAN Syndecan-4 OS=Homo sapiens OX=9606 GN=SDC4 PE=1 SV=2	0.0204936	1	K	K(1)APTNEFYA	2	0.47926	9.40628e+07	8.84798e+07	-0.0882761	85932000	5.78296e+07	0.571388
sp|Q9NP58|ABCB6_HUMAN	836	>sp|Q9NP58|ABCB6_HUMAN ATP-binding cassette sub-family B member 6, mitochondrial OS=Homo sapiens OX=9606 GN=ABCB6 PE=1 SV=1	1.48345e-108	1	K	GGVYADMWQLQQGQEETSEDTK(1)PQTMER	3	-0.55194	3.25894e+06	1	-21.636	18335000	1.23439e+07	0.570806
sp|Q9UHP3|UBP25_HUMAN	630	>sp|Q9UHP3|UBP25_HUMAN Ubiquitin carboxyl-terminal hydrolase 25 OS=Homo sapiens OX=9606 GN=USP25 PE=1 SV=4	7.00876e-33	1	K	YNDIAVTK(1)SSWEELVR	3	0.74472	5.01634e+07	1.28814e+07	-1.96135	18302000	1.23439e+07	0.568207
sp|P46977|STT3A_HUMAN	613	>sp|P46977|STT3A_HUMAN Dolichyl-diphosphooligosaccharide--protein glycosyltransferase subunit STT3A OS=Homo sapiens OX=9606 GN=STT3A PE=1 SV=2	7.83262e-06	1;2	K	IGGSTDTGK(1)HIK(1)ENDYYTPTGEFR	4	-0.29868	5.29171e+07	4.13123e+07	-0.357161	16174000	1.09184e+07	0.566921
sp|Q8N5G2|MACOI_HUMAN	311	>sp|Q8N5G2|MACOI_HUMAN Macoilin OS=Homo sapiens OX=9606 GN=MACO1 PE=1 SV=1	1.18665e-05	1	K	LNNDLVGSTENLLK(0.999)EDSCTASSK(0.001)	3	0.20795	2.75246e+06	1	-21.3923	30375000	2.05389e+07	0.564526
sp|P05023|AT1A1_HUMAN	671	>sp|P05023|AT1A1_HUMAN Sodium/potassium-transporting ATPase subunit alpha-1 OS=Homo sapiens OX=9606 GN=ATP1A1 PE=1 SV=1	2.77217e-05	1	K	ACVVHGSDLK(1)DMTSEQLDDILK	3	-3.8903	1.05245e+07	1.95824e+07	0.895808	42988000	2.90736e+07	0.564222
sp|O96005|CLPT1_HUMAN	460	>sp|O96005|CLPT1_HUMAN Cleft lip and palate transmembrane protein 1 OS=Homo sapiens OX=9606 GN=CLPTM1 PE=1 SV=1	0.00284006	1	K	DK(1)STYIESSTK	2	0.27112	1.79102e+07	1.90926e+07	0.0922281	12649000	8.56005e+06	0.563332
sp|Q14032|BAAT_HUMAN	345	>sp|Q14032|BAAT_HUMAN Bile acid-CoA:amino acid N-acyltransferase OS=Homo sapiens OX=9606 GN=BAAT PE=1 SV=1	0.00019164	1	K	AHAEQAIGQLK(1)R	3	-0.41974	1	1	0	31573000	2.13699e+07	0.563112
sp|Q6ICB0|DESI1_HUMAN	18	>sp|Q6ICB0|DESI1_HUMAN Desumoylating isopeptidase 1 OS=Homo sapiens OX=9606 GN=DESI1 PE=1 SV=1	0.0135148	1	K	LYVYDLSK(1)GLAR	3	1.1988	1.2132e+07	1.22022e+06	-3.3136	2941400	1.99254e+06	0.561892
sp|O14964|HGS_HUMAN	93	>sp|O14964|HGS_HUMAN Hepatocyte growth factor-regulated tyrosine kinase substrate OS=Homo sapiens OX=9606 GN=HGS PE=1 SV=1	0.0192428	1	K	QTMEELK(0.98)DLLK(0.02)R	3	0.5112	1	1	0	10697000	7.2499e+06	0.561174
sp|O75886|STAM2_HUMAN	202	>sp|O75886|STAM2_HUMAN Signal transducing adapter molecule 2 OS=Homo sapiens OX=9606 GN=STAM2 PE=1 SV=1	1.96791e-38	1	K	SLYPSSEIQLNNK(1)VAR	3	0.37705	1.21285e+08	7.35126e+07	-0.722334	106740000	7.24e+07	0.560039
sp|P05023|AT1A1_HUMAN;sp|P13637|AT1A3_HUMAN;sp|P50993|AT1A2_HUMAN	629;619;626	>sp|P05023|AT1A1_HUMAN Sodium/potassium-transporting ATPase subunit alpha-1 OS=Homo sapiens OX=9606 GN=ATP1A1 PE=1 SV=1;>sp|P13637|AT1A3_HUMAN Sodium/potassium-transporting ATPase subunit alpha-3 OS=Homo sapiens OX=9606 GN=ATP1A3 PE=1 SV=3;>sp|P50993|AT1A2	4.57347e-15	1	K	AIAK(1)GVGIISEGNETVEDIAAR	3	-0.16785	5.96643e+06	7.52846e+06	0.335487	73896000	5.01368e+07	0.559626
sp|P36578|RL4_HUMAN	364	>sp|P36578|RL4_HUMAN 60S ribosomal protein L4 OS=Homo sapiens OX=9606 GN=RPL4 PE=1 SV=5	1.72908e-07	1;2	K	VDKAAAAAAALQAK(0.999)SDEK(0.001)	3	1.1858	7.08054e+07	5.74289e+07	-0.302082	98559000	6.69802e+07	0.557252
sp|Q86Y82|STX12_HUMAN	58	>sp|Q86Y82|STX12_HUMAN Syntaxin-12 OS=Homo sapiens OX=9606 GN=STX12 PE=1 SV=1	5.71513e-80	1	K	QDSSK(1)LQENLQQLQHSTNQLAK	3	-0.51018	4.42283e+08	1.8613e+08	-1.24866	582920000	3.96309e+08	0.556673
sp|Q9BWD3|RTL8A_HUMAN;sp|A6ZKI3|RTL8C_HUMAN	86;86	>sp|Q9BWD3|RTL8A_HUMAN Retrotransposon Gag-like protein 8A OS=Homo sapiens OX=9606 GN=RTL8A PE=1 SV=3;>sp|A6ZKI3|RTL8C_HUMAN Retrotransposon Gag-like protein 8B OS=Homo sapiens OX=9606 GN=RTL8C PE=1 SV=1	4.3989e-05	1	K	K(1)ESPLLNDYR	2	0.26007	1.02477e+08	9.2279e+07	-0.151219	73299000	4.99425e+07	0.553526
sp|Q96PH1|NOX5_HUMAN	501	>sp|Q96PH1|NOX5_HUMAN NADPH oxidase 5 OS=Homo sapiens OX=9606 GN=NOX5 PE=1 SV=1	1.85254e-10	1	K	YEWHPFTISSAPEQK(1)DTIWLHIR	5	0.36632	1	363596	18.472	5034700	3.43993e+06	0.549526
sp|O14818|PSA7_HUMAN	242	>sp|O14818|PSA7_HUMAN Proteasome subunit alpha type-7 OS=Homo sapiens OX=9606 GN=PSMA7 PE=1 SV=1	0.000356948	1	K	YVAEIEK(0.005)EK(0.018)EENEK(0.169)K(0.638)K(0.169)	4	0.28815	1	1.72784e+06	20.7205	3803200	2.59917e+06	0.549165
sp|Q96LJ7|DHRS1_HUMAN	29	>sp|Q96LJ7|DHRS1_HUMAN Dehydrogenase/reductase SDR family member 1 OS=Homo sapiens OX=9606 GN=DHRS1 PE=1 SV=1	1.21335e-06	1	K	GIALQLCK(1)AGATVYITGR	3	-0.0081304	2.57505e+06	4.9843e+06	0.952791	22881000	1.56483e+07	0.548147
sp|P49368|TCPG_HUMAN	507	>sp|P49368|TCPG_HUMAN T-complex protein 1 subunit gamma OS=Homo sapiens OX=9606 GN=CCT3 PE=1 SV=4	3.96432e-44	1	K	LQTYK(1)TAVETAVLLLR	3	0.49797	2.06755e+06	557959	-1.88969	1016600	696638	0.54527
sp|Q92783|STAM1_HUMAN	154	>sp|Q92783|STAM1_HUMAN Signal transducing adapter molecule 1 OS=Homo sapiens OX=9606 GN=STAM PE=1 SV=3	4.14446e-93	1	K	NLKEQGVTFPAIGSQAAEQAK(1)ASPALVAK	4	0.12591	2.92071e+08	1.30182e+08	-1.16579	150770000	1.03346e+08	0.544869
sp|Q15154|PCM1_HUMAN	738	>sp|Q15154|PCM1_HUMAN Pericentriolar material 1 protein OS=Homo sapiens OX=9606 GN=PCM1 PE=1 SV=4	0.000162196	1	K	FYEAK(1)LQQQQR	3	-2.1454	5.94009e+06	1.36161e+07	1.19675	20889000	1.43224e+07	0.544475
sp|Q8TC12|RDH11_HUMAN;sp|Q96NR8|RDH12_HUMAN	105;103	>sp|Q8TC12|RDH11_HUMAN Retinol dehydrogenase 11 OS=Homo sapiens OX=9606 GN=RDH11 PE=1 SV=2;>sp|Q96NR8|RDH12_HUMAN Retinol dehydrogenase 12 OS=Homo sapiens OX=9606 GN=RDH12 PE=1 SV=3	0.000543666	1	K	KLDLSDTK(1)SIR	3	0.63341	6.60405e+07	1.11701e+08	0.758218	133650000	9.1668e+07	0.54397
sp|Q13185|CBX3_HUMAN	34	>sp|Q13185|CBX3_HUMAN Chromobox protein homolog 3 OS=Homo sapiens OX=9606 GN=CBX3 PE=1 SV=4	9.57485e-27	1	K	KVEEAEPEEFVVEK(1)VLDRR	4	0.049703	1.17074e+07	1.05228e+07	-0.153901	33824000	2.32127e+07	0.543131
sp|P31943|HNRH1_HUMAN;sp|P55795|HNRH2_HUMAN	167;167	>sp|P31943|HNRH1_HUMAN Heterogeneous nuclear ribonucleoprotein H OS=Homo sapiens OX=9606 GN=HNRNPH1 PE=1 SV=4;>sp|P55795|HNRH2_HUMAN Heterogeneous nuclear ribonucleoprotein H2 OS=Homo sapiens OX=9606 GN=HNRNPH2 PE=1 SV=1	2.9855e-19	1	K	STGEAFVQFASQEIAEK(0.935)ALK(0.035)K(0.03)	4	-0.23927	6.44701e+06	1.61156e+06	-2.00017	8854800	6.08835e+06	0.540409
sp|O95470|SGPL1_HUMAN	155	>sp|O95470|SGPL1_HUMAN Sphingosine-1-phosphate lyase 1 OS=Homo sapiens OX=9606 GN=SGPL1 PE=1 SV=3	1.47588e-05	1	K	ASGTVYSGEEK(1)LTELLVK	3	0.39973	4.49662e+06	3.23083e+06	-0.476934	11496000	7.91579e+06	0.538327
sp|P25445|TNR6_HUMAN	288	>sp|P25445|TNR6_HUMAN Tumor necrosis factor receptor superfamily member 6 OS=Homo sapiens OX=9606 GN=FAS PE=1 SV=1	0.00205555	1	K	K(1)EAYDTLIK	2	0.5043	4.1332e+06	4.0909e+06	-0.0148441	41636000	2.86704e+07	0.538271
sp|P50402|EMD_HUMAN	79	>sp|P50402|EMD_HUMAN Emerin OS=Homo sapiens OX=9606 GN=EMD PE=1 SV=1	0.00397789	1	K	K(1)EDALLYQSK	2	-1.8633	1	6.20596e+06	22.5652	17313000	1.19284e+07	0.537459
sp|P26358|DNMT1_HUMAN	961	>sp|P26358|DNMT1_HUMAN DNA (cytosine-5)-methyltransferase 1 OS=Homo sapiens OX=9606 GN=DNMT1 PE=1 SV=2	0.00135804	1	K	K(1)EPVDEDLYPEHYR	3	-0.10521	1	1	0	14587000	1.00507e+07	0.537387
sp|Q15286|RAB35_HUMAN	189	>sp|Q15286|RAB35_HUMAN Ras-related protein Rab-35 OS=Homo sapiens OX=9606 GN=RAB35 PE=1 SV=1	0.000285368	1	K	QQQQQQNDVVK(0.99)LTK(0.01)	3	1.4944	4.62528e+07	1	-25.463	24342000	1.67787e+07	0.53682
sp|Q9UHI5|LAT2_HUMAN	527	>sp|Q9UHI5|LAT2_HUMAN Large neutral amino acids transporter small subunit 2 OS=Homo sapiens OX=9606 GN=SLC7A8 PE=1 SV=1	1.99492e-79	1	K	DK(1)DVAGQPQP	2	-0.074678	1	1	0	301170000	2.07601e+08	0.536766
sp|P63096|GNAI1_HUMAN	132	>sp|P63096|GNAI1_HUMAN Guanine nucleotide-binding protein G(i) subunit alpha-1 OS=Homo sapiens OX=9606 GN=GNAI1 PE=1 SV=2	4.53257e-06	1	K	LWK(1)DSGVQACFNR	2	0.3393	5.78756e+07	5.9132e+07	0.0309827	111250000	7.66869e+07	0.536753
sp|P67809|YBOX1_HUMAN	264	>sp|P67809|YBOX1_HUMAN Nuclease-sensitive element-binding protein 1 OS=Homo sapiens OX=9606 GN=YBX1 PE=1 SV=3	2.86547e-48	1	K	EDGNEEDK(1)ENQGDETQGQQPPQRR	4	-0.30567	1.40449e+07	9.85355e+06	-0.511336	12828000	8.85151e+06	0.535301
sp|Q9UQ35|SRRM2_HUMAN	37	>sp|Q9UQ35|SRRM2_HUMAN Serine/arginine repetitive matrix protein 2 OS=Homo sapiens OX=9606 GN=SRRM2 PE=1 SV=2	0.0243083	1	K	RGERPDYK(1)GEEELR	4	1.2565	1.64373e+07	2.71653e+07	0.724786	27480000	1.89625e+07	0.535236
sp|P02786|TFR1_HUMAN	39	>sp|P02786|TFR1_HUMAN Transferrin receptor protein 1 OS=Homo sapiens OX=9606 GN=TFRC PE=1 SV=2	6.40447e-93	1	K	QVDGDNSHVEMK(1)LAVDEEENADNNTK	3	-0.93787	3.47114e+08	1.40946e+08	-1.30027	267590000	1.84773e+08	0.53427
sp|Q96N66|MBOA7_HUMAN	288	>sp|Q96N66|MBOA7_HUMAN Lysophospholipid acyltransferase 7 OS=Homo sapiens OX=9606 GN=MBOAT7 PE=1 SV=2	1.81783e-87	1	K	AGGGPTLQCPPPSSPEK(1)AASLEYDYETIR	3	0.048937	3.32604e+07	1.99436e+07	-0.737881	6672200	4.60784e+06	0.534072
sp|P54252|ATX3_HUMAN	190	>sp|P54252|ATX3_HUMAN Ataxin-3 OS=Homo sapiens OX=9606 GN=ATXN3 PE=1 SV=5	1.22178e-06	1	K	VQQMHRPK(1)LIGEELAQLK	4	-0.72247	2.77517e+07	2.09201e+07	-0.407684	10783000	7.45141e+06	0.533173
sp|Q12767|TMM94_HUMAN	27	>sp|Q12767|TMM94_HUMAN Transmembrane protein 94 OS=Homo sapiens OX=9606 GN=TMEM94 PE=1 SV=1	3.88909e-27	1	K	ALSVLK(1)EQLEAVLEGHLR	3	-0.22735	1	1	0	1975800	1.36539e+06	0.533124
sp|Q8WUM4|PDC6I_HUMAN	501	>sp|Q8WUM4|PDC6I_HUMAN Programmed cell death 6-interacting protein OS=Homo sapiens OX=9606 GN=PDCD6IP PE=1 SV=1	1.08887e-14	1	K	TVLDK(1)AVQADGQVK	2	-0.10837	4.20161e+07	2.77117e+07	-0.600447	21316000	1.4755e+07	0.530737
sp|Q6DD88|ATLA3_HUMAN	239	>sp|Q6DD88|ATLA3_HUMAN Atlastin-3 OS=Homo sapiens OX=9606 GN=ATL3 PE=1 SV=1	4.93927e-11	1	K	LQVK(1)EHQHEEIQNVR	4	0.050998	2.09637e+07	4.2222e+07	1.0101	14486000	1.00344e+07	0.529698
sp|P14174|MIF_HUMAN	78	>sp|P14174|MIF_HUMAN Macrophage migration inhibitory factor OS=Homo sapiens OX=9606 GN=MIF PE=1 SV=4	5.2563e-08	1	K	SYSK(1)LLCGLLAER	3	2.5116	3.05315e+07	1.24008e+06	-4.62179	8650100	5.99388e+06	0.529226
sp|P68363|TBA1B_HUMAN;sp|Q71U36|TBA1A_HUMAN;sp|Q9BQE3|TBA1C_HUMAN	112;112;112	>sp|P68363|TBA1B_HUMAN Tubulin alpha-1B chain OS=Homo sapiens OX=9606 GN=TUBA1B PE=1 SV=1;>sp|Q71U36|TBA1A_HUMAN Tubulin alpha-1A chain OS=Homo sapiens OX=9606 GN=TUBA1A PE=1 SV=1;>sp|Q9BQE3|TBA1C_HUMAN Tubulin alpha-1C chain OS=Homo sapiens OX=9606 GN=TUB	3.87905e-54	1	K	GHYTIGK(1)EIIDLVLDR	3	1.6934	2.22793e+07	2.96411e+07	0.411893	11503000	7.9808e+06	0.527404
sp|Q92879|CELF1_HUMAN;sp|O95319|CELF2_HUMAN	59;83	>sp|Q92879|CELF1_HUMAN CUGBP Elav-like family member 1 OS=Homo sapiens OX=9606 GN=CELF1 PE=1 SV=2;>sp|O95319|CELF2_HUMAN CUGBP Elav-like family member 2 OS=Homo sapiens OX=9606 GN=CELF2 PE=1 SV=1	5.56252e-07	1	K	SQNPPQSK(1)GCCFVTFYTR	3	-1.6717	2.60838e+07	1.11763e+07	-1.22271	11186000	7.76499e+06	0.526638
sp|Q9NV79|PCMD2_HUMAN	295	>sp|Q9NV79|PCMD2_HUMAN Protein-L-isoaspartate O-methyltransferase domain-containing protein 2 OS=Homo sapiens OX=9606 GN=PCMTD2 PE=2 SV=2	0.000344764	1	K	RMETIVFLDK(1)EVFASR	3	1.7943	1	201967	17.6238	10920000	7.58095e+06	0.526522
sp|P32969|RL9_HUMAN	21	>sp|P32969|RL9_HUMAN 60S ribosomal protein L9 OS=Homo sapiens OX=9606 GN=RPL9 PE=1 SV=1	7.37151e-06	1	K	TILSNQTVDIPENVDITLK(1)GR	3	-0.71998	3.8593e+07	6.20863e+06	-2.63599	7861300	5.46034e+06	0.525778
sp|Q15334|L2GL1_HUMAN	19	>sp|Q15334|L2GL1_HUMAN Lethal(2) giant larvae protein homolog 1 OS=Homo sapiens OX=9606 GN=LLGL1 PE=1 SV=3	0.00542109	1	K	LK(1)QELFAFNK	3	-2.4059	2.62322e+07	282509	-6.5369	309880	215336	0.525118
sp|Q9BXS9|S26A6_HUMAN	638	>sp|Q9BXS9|S26A6_HUMAN Solute carrier family 26 member 6 OS=Homo sapiens OX=9606 GN=SLC26A6 PE=1 SV=1	1.21842e-16	1	K	MMQVSSGDK(1)MEDATANGQEDSKAPDGSTLK	4	-1.398	1	1	0	29441000	2.04705e+07	0.524283
sp|O14763|TR10B_HUMAN	245	>sp|O14763|TR10B_HUMAN Tumor necrosis factor receptor superfamily member 10B OS=Homo sapiens OX=9606 GN=TNFRSF10B PE=1 SV=2	0.00144561	1	K	VLPYLK(1)GICSGGGGDPER	3	0.36596	1	5.51569e+06	22.3951	27975000	1.94684e+07	0.523005
sp|P08195|4F2_HUMAN	122	>sp|P08195|4F2_HUMAN 4F2 cell-surface antigen heavy chain OS=Homo sapiens OX=9606 GN=SLC3A2 PE=1 SV=3	6.89492e-206	1;2	K	EVELNELEPEK(1)QPMNAASGAAMSLAGAEK(0.811)NGLVK(0.189)	4	0.30052	7.11722e+07	2.13122e+07	-1.73964	236430000	1.64768e+08	0.520975
sp|Q9H0C5|BTBD1_HUMAN	388	>sp|Q9H0C5|BTBD1_HUMAN BTB/POZ domain-containing protein 1 OS=Homo sapiens OX=9606 GN=BTBD1 PE=1 SV=1	5.25738e-52	1	K	K(1)QTLGQNDTGFSCDGTANTFR	3	0.4418	2.63326e+07	2.43787e+07	-0.111233	11846000	8.26297e+06	0.519667
sp|Q96RL1|UIMC1_HUMAN	31	>sp|Q96RL1|UIMC1_HUMAN BRCA1-A complex subunit RAP80 OS=Homo sapiens OX=9606 GN=UIMC1 PE=1 SV=2	2.71173e-12	1	K	DVETTSSVSVK(1)R	3	1.8032	2.73689e+07	4.74001e+07	0.792352	25729000	1.79469e+07	0.519658
sp|Q9H3Z4|DNJC5_HUMAN	46	>sp|Q9H3Z4|DNJC5_HUMAN DnaJ homolog subfamily C member 5 OS=Homo sapiens OX=9606 GN=DNAJC5 PE=1 SV=1	5.09914e-06	1	K	YHPDK(1)NPDNPEAADKFK	3	-0.25968	1.07386e+07	1.24131e+07	0.209069	14043000	9.80727e+06	0.517928
sp|O95159|ZFPL1_HUMAN	234	>sp|O95159|ZFPL1_HUMAN Zinc finger protein-like 1 OS=Homo sapiens OX=9606 GN=ZFPL1 PE=1 SV=2	0.000110607	1	K	DDDRTPGLHGDCDDDK(1)YR	4	0.16245	1	2.60282e+07	24.6336	23673000	1.65538e+07	0.516079
sp|O60664|PLIN3_HUMAN	356	>sp|O60664|PLIN3_HUMAN Perilipin-3 OS=Homo sapiens OX=9606 GN=PLIN3 PE=1 SV=3	9.42566e-227	1	K	DIAQQLQATCTSLGSSIQGLPTNVK(1)DQVQQAR	4	0.56046	1	1	0	48563000	3.40156e+07	0.513661
sp|P63104|1433Z_HUMAN	157	>sp|P63104|1433Z_HUMAN 14-3-3 protein zeta/delta OS=Homo sapiens OX=9606 GN=YWHAZ PE=1 SV=1	8.29218e-07	1	K	GIVDQSQQAYQEAFEISK(0.54)K(0.46)	3	2.2615	6.01664e+06	1.74276e+06	-1.78759	21196000	1.48649e+07	0.511878
sp|Q92841|DDX17_HUMAN	269	>sp|Q92841|DDX17_HUMAN Probable ATP-dependent RNA helicase DDX17 OS=Homo sapiens OX=9606 GN=DDX17 PE=1 SV=2	6.56983e-07	1	K	ELAQQVQQVADDYGK(1)CSR	3	-0.15425	6.49198e+06	5.86278e+06	-0.147074	13187000	9.25038e+06	0.511531
sp|P09417|DHPR_HUMAN	138	>sp|P09417|DHPR_HUMAN Dihydropteridine reductase OS=Homo sapiens OX=9606 GN=QDPR PE=1 SV=2	3.31718e-08	1	K	EGGLLTLAGAK(1)AALDGTPGMIGYGMAK	3	-0.96333	950991	1	-19.8591	4602900	3.23206e+06	0.510088
sp|P16435|NCPR_HUMAN	56	>sp|P16435|NCPR_HUMAN NADPH--cytochrome P450 reductase OS=Homo sapiens OX=9606 GN=POR PE=1 SV=2	9.05255e-18	1	K	EEVPEFTK(1)IQTLTSSVR	3	-0.11326	1	2.72898e+06	21.3799	12992000	9.13185e+06	0.508645
sp|O14495|PLPP3_HUMAN	293	>sp|O14495|PLPP3_HUMAN Phospholipid phosphatase 3 OS=Homo sapiens OX=9606 GN=PLPP3 PE=1 SV=1	0.000986058	1	K	K(1)EILSPVDIIDR	3	-0.29345	1	1	0	22181000	1.56214e+07	0.505802
sp|Q13433|S39A6_HUMAN	483	>sp|Q13433|S39A6_HUMAN Zinc transporter ZIP6 OS=Homo sapiens OX=9606 GN=SLC39A6 PE=1 SV=3	4.91367e-103	1	K	YESQLSTNEEK(1)VDTDDRTEGYLR	4	-1.5363	1.38636e+07	1	-23.7248	76886000	5.42038e+07	0.504328
sp|Q9Y490|TLN1_HUMAN	869	>sp|Q9Y490|TLN1_HUMAN Talin-1 OS=Homo sapiens OX=9606 GN=TLN1 PE=1 SV=3	0.000184228	1	K	ILADATAK(0.999)MVEAAK(0.001)	3	-1.8984	2.17277e+07	2.16919e+07	-0.00238295	22711000	1.60137e+07	0.504088
sp|O95772|STR3N_HUMAN	229	>sp|O95772|STR3N_HUMAN STARD3 N-terminal-like protein OS=Homo sapiens OX=9606 GN=STARD3NL PE=1 SV=1	0.0204464	1	K	QDSEK(1)PLLEL	2	-0.53015	2.65641e+07	8.08805e+06	-1.71561	10564000	7.4574e+06	0.502411
sp|Q96BY9|SARAF_HUMAN	43	>sp|Q96BY9|SARAF_HUMAN Store-operated calcium entry-associated regulatory factor OS=Homo sapiens OX=9606 GN=SARAF PE=1 SV=1	0.0324906		K	DVK(1)ALTLHYDR	3	0.65737	4.65686e+06	4.71315e+06	0.0173337	2585700	1.82549e+06	0.502272
sp|P61978|HNRPK_HUMAN	163	>sp|P61978|HNRPK_HUMAN Heterogeneous nuclear ribonucleoprotein K OS=Homo sapiens OX=9606 GN=HNRNPK PE=1 SV=1	0.000362655	1	K	LLIHQSLAGGIIGVK(0.978)GAK(0.022)	3	0.16777	1	1.40863e+07	23.7478	18191000	1.28522e+07	0.501205
sp|P17302|CXA1_HUMAN	243	>sp|P17302|CXA1_HUMAN Gap junction alpha-1 protein OS=Homo sapiens OX=9606 GN=GJA1 PE=1 SV=2	3.2921e-18	1	K	GK(1)SDPYHATSGALSPAK	3	0.24892	8.08143e+07	4.67271e+07	-0.790351	16188000	1.14539e+07	0.499092
sp|Q9NXW2|DJB12_HUMAN	168	>sp|Q9NXW2|DJB12_HUMAN DnaJ homolog subfamily B member 12 OS=Homo sapiens OX=9606 GN=DNAJB12 PE=1 SV=4	0.000361064	1	K	K(1)QYDQFGDDKSQAAR	4	0.88049	1	6.05366e+06	22.5294	8020600	5.67554e+06	0.498953
sp|P08133|ANXA6_HUMAN	102	>sp|P08133|ANXA6_HUMAN Annexin A6 OS=Homo sapiens OX=9606 GN=ANXA6 PE=1 SV=3	0.0030308	1	K	EIK(1)DAISGIGTDEK	2	1.9357	1.23239e+07	8.48762e+06	-0.538031	8312400	5.88976e+06	0.497055
sp|Q8N0X7|SPART_HUMAN	377	>sp|Q8N0X7|SPART_HUMAN Spartin OS=Homo sapiens OX=9606 GN=SPART PE=1 SV=1	9.35096e-10	2;3	K	TRPSSDQLK(1)EASGTDVK(1)QLDQGNK(1)DVR	5	-0.28017	5.53345e+06	3.15016e+07	2.50917	5117200	3.62886e+06	0.495838
sp|P13639|EF2_HUMAN	272	>sp|P13639|EF2_HUMAN Elongation factor 2 OS=Homo sapiens OX=9606 GN=EEF2 PE=1 SV=4	2.62174e-07	1	K	YFDPANGK(0.998)FSK(0.002)	3	0.21686	8.7368e+07	1.04487e+08	0.258152	89221000	6.33251e+07	0.494606
sp|P18124|RL7_HUMAN	223	>sp|P18124|RL7_HUMAN 60S ribosomal protein L7 OS=Homo sapiens OX=9606 GN=RPL7 PE=1 SV=1	0.00048996	1	K	K(1)TTHFVEGGDAGNREDQINR	4	-1.4084	4.1645e+06	1.46173e+07	1.81147	25592000	1.81694e+07	0.494186
sp|P31946|1433B_HUMAN;sp|P61981|1433G_HUMAN;sp|P63104|1433Z_HUMAN;sp|Q04917|1433F_HUMAN	51;50;49;50	>sp|P31946|1433B_HUMAN 14-3-3 protein beta/alpha OS=Homo sapiens OX=9606 GN=YWHAB PE=1 SV=3;>sp|P61981|1433G_HUMAN 14-3-3 protein gamma OS=Homo sapiens OX=9606 GN=YWHAG PE=1 SV=2;>sp|P63104|1433Z_HUMAN 14-3-3 protein zeta/delta OS=Homo sapiens OX=9606 GN=Y	1.78872e-66	1	K	NLLSVAYK(1)NVVGAR	2	-0.13295	6.29812e+08	8.51622e+07	-2.88664	267530000	1.9026e+08	0.491728
sp|P62424|RL7A_HUMAN	48	>sp|P62424|RL7A_HUMAN 60S ribosomal protein L7a OS=Homo sapiens OX=9606 GN=RPL7A PE=1 SV=2	0.000172862	1	K	NFGIGQDIQPK(1)R	3	-0.65182	4.16581e+07	4.79259e+07	0.20221	115510000	8.21898e+07	0.490987
sp|Q9NS91|RAD18_HUMAN	186	>sp|Q9NS91|RAD18_HUMAN E3 ubiquitin-protein ligase RAD18 OS=Homo sapiens OX=9606 GN=RAD18 PE=1 SV=2	1.08534e-38	1	K	SVEEIAPDPSEAK(0.996)RPEPPSTSTLK(0.004)	4	-0.14469	1.37325e+08	1.57812e+08	0.200611	69695000	4.95991e+07	0.490741
sp|Q08357|S20A2_HUMAN	262	>sp|Q08357|S20A2_HUMAN Sodium-dependent phosphate transporter 2 OS=Homo sapiens OX=9606 GN=SLC20A2 PE=1 SV=1	4.10534e-65	1	K	VSDESLSK(1)VQEAESPVFK	2	-0.26003	2.74548e+08	1.05928e+08	-1.37397	58107000	4.14554e+07	0.487152
sp|Q96GA7|SDSL_HUMAN	227	>sp|Q96GA7|SDSL_HUMAN Serine dehydratase-like OS=Homo sapiens OX=9606 GN=SDSL PE=1 SV=1	2.07774e-06	1	K	LVTLPDITSVAK(0.99)SLGAK(0.01)	3	-0.566	320698	1	-18.2909	5140300	3.66882e+06	0.486536
sp|Q13347|EIF3I_HUMAN	176	>sp|Q13347|EIF3I_HUMAN Eukaryotic translation initiation factor 3 subunit I OS=Homo sapiens OX=9606 GN=EIF3I PE=1 SV=1	2.00052e-36	1	K	ITSAVWGPLGECIIAGHESGELNQYSAK(0.999)SGEVLVNVK(0.001)	4	1.027	1	1	0	9414900	6.73383e+06	0.483519
sp|P62258|1433E_HUMAN	80	>sp|P62258|1433E_HUMAN 14-3-3 protein epsilon OS=Homo sapiens OX=9606 GN=YWHAE PE=1 SV=1	0.000261142	1	K	EENKGGEDK(0.023)LK(0.977)MIR	3	-0.82168	1.76526e+07	3.19873e+07	0.857618	16705000	1.19485e+07	0.483446
sp|Q9BPW8|NIPS1_HUMAN	146	>sp|Q9BPW8|NIPS1_HUMAN Protein NipSnap homolog 1 OS=Homo sapiens OX=9606 GN=NIPSNAP1 PE=1 SV=1	0.00601045	1	K	NNK(1)EYLEFR	3	-0.49885	9.14169e+06	1	-23.124	23437000	1.67713e+07	0.482791
sp|P52272|HNRPM_HUMAN	381	>sp|P52272|HNRPM_HUMAN Heterogeneous nuclear ribonucleoprotein M OS=Homo sapiens OX=9606 GN=HNRNPM PE=1 SV=3	5.79917e-43	1	K	INEILSNALK(1)R	3	-0.30755	2.44464e+08	3.6939e+08	0.595519	231960000	1.66015e+08	0.482565
sp|Q9BUF5|TBB6_HUMAN	58	>sp|Q9BUF5|TBB6_HUMAN Tubulin beta-6 chain OS=Homo sapiens OX=9606 GN=TUBB6 PE=1 SV=1	4.98264e-08	1	K	INVYYNESSSQK(1)YVPR	3	-0.22008	5.19419e+07	9.32452e+07	0.84413	318200	227899	0.481539
sp|Q9UMX9|S45A2_HUMAN	273	>sp|Q9UMX9|S45A2_HUMAN Membrane-associated transporter protein OS=Homo sapiens OX=9606 GN=SLC45A2 PE=1 SV=2	2.54392e-34	1	K	GIPPQQTPQDPPLSSDGMYEYGSIEK(0.834)VK(0.166)	3	-0.12325	1	1	0	217340000	1.55701e+08	0.481179
sp|P60953|CDC42_HUMAN	128	>sp|P60953|CDC42_HUMAN Cell division control protein 42 homolog OS=Homo sapiens OX=9606 GN=CDC42 PE=1 SV=2	0.00123075	1	K	DDPSTIEK(0.999)LAK(0.001)	3	1.4773	3.13611e+07	1.61321e+07	-0.959045	20181000	1.44727e+07	0.479667
sp|P00338|LDHA_HUMAN	14	>sp|P00338|LDHA_HUMAN L-lactate dehydrogenase A chain OS=Homo sapiens OX=9606 GN=LDHA PE=1 SV=2	1.81811e-17	1	K	DQLIYNLLK(1)EEQTPQNK	3	1.1199	2.47666e+07	1.33856e+07	-0.887718	15014000	1.07744e+07	0.478701
sp|P60033|CD81_HUMAN	144	>sp|P60033|CD81_HUMAN CD81 antigen OS=Homo sapiens OX=9606 GN=CD81 PE=1 SV=1	3.11757e-114	1	K	QFYDQALQQAVVDDDANNAK(0.997)AVVK(0.003)	3	0.49138	2.56399e+07	1.76272e+07	-0.540583	31928000	2.29353e+07	0.477251
sp|P43007|SATT_HUMAN	484	>sp|P43007|SATT_HUMAN Neutral amino acid transporter A OS=Homo sapiens OX=9606 GN=SLC1A4 PE=1 SV=1	9.36865e-06	1	K	K(1)GEQELAEVK	2	0.81654	3.2195e+06	1	-21.6184	43585000	3.13198e+07	0.476758
sp|O60784|TOM1_HUMAN	484	>sp|O60784|TOM1_HUMAN Target of Myb protein 1 OS=Homo sapiens OX=9606 GN=TOM1 PE=1 SV=2	0.0263261	1	K	TQEK(1)DDDMLFAL	2	-2.0414	1	1	0	11834000	8.50396e+06	0.476731
sp|Q16655|MAR1_HUMAN	85	>sp|Q16655|MAR1_HUMAN Melanoma antigen recognized by T-cells 1 OS=Homo sapiens OX=9606 GN=MLANA PE=1 SV=1	5.76547e-169	1;2;3	K	DSK(1)VSLQEK(1)NCEPVVPNAPPAYEK(1)LSAEQSPPPYSP	4	-0.51957	1	1	0	4231800000	3.04607e+09	0.474324
sp|Q9BZQ8|NIBAN_HUMAN	371	>sp|Q9BZQ8|NIBAN_HUMAN Protein Niban OS=Homo sapiens OX=9606 GN=FAM129A PE=1 SV=1	0.000146835	1	K	VLFEK(1)EVNEVSQNFQTTK	3	-0.18135	1.09461e+06	996057	-0.136117	7757100	5.58694e+06	0.473459
sp|Q8IZ07|AN13A_HUMAN	195	>sp|Q8IZ07|AN13A_HUMAN Ankyrin repeat domain-containing protein 13A OS=Homo sapiens OX=9606 GN=ANKRD13A PE=1 SV=3	3.50149e-10	1	K	GEDNWAELMEVNHDDK(1)VVTTER	4	0.49329	3.55599e+07	2.88055e+07	-0.303905	10291000	7.41206e+06	0.473436
sp|Q15599|NHRF2_HUMAN	291	>sp|Q15599|NHRF2_HUMAN Na(+)/H(+) exchange regulatory cofactor NHE-RF2 OS=Homo sapiens OX=9606 GN=SLC9A3R2 PE=1 SV=2	6.67818e-62	1	K	SDLPGSDKDTEDGSAWK(1)QDPFQESGLHLSPTAAEAK	4	0.50788	1	1	0	94445000	6.80312e+07	0.473278
sp|P51572|BAP31_HUMAN	176	>sp|P51572|BAP31_HUMAN B-cell receptor-associated protein 31 OS=Homo sapiens OX=9606 GN=BCAP31 PE=1 SV=3	3.21521e-07	1	K	LDVGNAEVK(1)LEEENR	3	-0.75115	5.13467e+07	3.38354e+07	-0.601737	41651000	3.00879e+07	0.469165
sp|Q16186|ADRM1_HUMAN	34	>sp|Q16186|ADRM1_HUMAN Proteasomal ubiquitin receptor ADRM1 OS=Homo sapiens OX=9606 GN=ADRM1 PE=1 SV=2	5.78022e-24	1	K	MSLK(1)GTTVTPDKR	3	-0.041298	1.27897e+07	1.45834e+07	0.189346	23749000	1.71575e+07	0.469028
sp|O15374|MOT5_HUMAN	244	>sp|O15374|MOT5_HUMAN Monocarboxylate transporter 5 OS=Homo sapiens OX=9606 GN=SLC16A4 PE=2 SV=1	9.55954e-53	1;2	K	DSTTQK(1)AGLPSK(1)NLTVSQNQSEEFYNGPNR	4	0.27045	2.14148e+08	2.30286e+08	0.104816	866270	625931	0.468813
sp|Q15836|VAMP3_HUMAN;sp|P63027|VAMP2_HUMAN;sp|P23763|VAMP1_HUMAN	35;52;54	>sp|Q15836|VAMP3_HUMAN Vesicle-associated membrane protein 3 OS=Homo sapiens OX=9606 GN=VAMP3 PE=1 SV=3;>sp|P63027|VAMP2_HUMAN Vesicle-associated membrane protein 2 OS=Homo sapiens OX=9606 GN=VAMP2 PE=1 SV=3;>sp|P23763|VAMP1_HUMAN Vesicle-associated membra	5.60895e-08	1	K	VNVDK(1)VLER	2	-0.19531	3.06756e+08	2.3222e+08	-0.401595	274510000	1.98582e+08	0.467123
sp|Q9UHD1|CHRD1_HUMAN	74	>sp|Q9UHD1|CHRD1_HUMAN Cysteine and histidine-rich domain-containing protein 1 OS=Homo sapiens OX=9606 GN=CHORDC1 PE=1 SV=2	0.000391184	1	K	HNSEKPPEPVK(0.997)PEVK(0.003)	4	-0.018092	1	1	0	6284700	4.54808e+06	0.466586
sp|P67809|YBOX1_HUMAN;sp|P16989|YBOX3_HUMAN	93;125	>sp|P67809|YBOX1_HUMAN Nuclease-sensitive element-binding protein 1 OS=Homo sapiens OX=9606 GN=YBX1 PE=1 SV=3;>sp|P16989|YBOX3_HUMAN Y-box-binding protein 3 OS=Homo sapiens OX=9606 GN=YBX3 PE=1 SV=4	3.71287e-07	1	K	EDVFVHQTAIK(0.416)K(0.584)	3	1.3687	1.38982e+08	269749	-9.00907	613350	444201	0.465499
sp|Q6P2Q9|PRP8_HUMAN	2031	>sp|Q6P2Q9|PRP8_HUMAN Pre-mRNA-processing-splicing factor 8 OS=Homo sapiens OX=9606 GN=PRPF8 PE=1 SV=2	0.000914698	1	K	QQIAEIEK(0.998)QTK(0.002)	3	-0.55495	6.7049e+06	4.72334e+06	-0.505411	4067200	2.9472e+06	0.464689
sp|P37108|SRP14_HUMAN	43	>sp|P37108|SRP14_HUMAN Signal recognition particle 14 kDa protein OS=Homo sapiens OX=9606 GN=SRP14 PE=1 SV=2	4.61727e-18	1	K	K(1)GTVEGFEPADNK	2	-1.3058	1	3.4672e+07	25.0473	25421000	1.8426e+07	0.464279
sp|Q9Y6I3|EPN1_HUMAN	107	>sp|Q9Y6I3|EPN1_HUMAN Epsin-1 OS=Homo sapiens OX=9606 GN=EPN1 PE=1 SV=2	1.79449e-187	1	K	ENMYAVQTLK(1)DFQYVDRDGKDQGVNVR	5	0.04703	6.23874e+08	4.99953e+08	-0.319463	119850000	8.69387e+07	0.46316
sp|Q92879|CELF1_HUMAN;sp|O95319|CELF2_HUMAN	436;458	>sp|Q92879|CELF1_HUMAN CUGBP Elav-like family member 1 OS=Homo sapiens OX=9606 GN=CELF1 PE=1 SV=2;>sp|O95319|CELF2_HUMAN CUGBP Elav-like family member 2 OS=Homo sapiens OX=9606 GN=CELF2 PE=1 SV=1	0.000650026	1	K	VFIDK(1)QTNLSK	3	0.3692	2.09229e+07	3.00857e+07	0.523993	31361000	2.27923e+07	0.460422
sp|Q9H2J7|S6A15_HUMAN	658	>sp|Q9H2J7|S6A15_HUMAN Sodium-dependent neutral amino acid transporter B(0)AT2 OS=Homo sapiens OX=9606 GN=SLC6A15 PE=1 SV=1	4.03922e-36	1	K	FNLIDDSSGNLASVTYK(1)R	3	0.80808	4.18036e+07	2.35328e+07	-0.828953	90597000	6.58596e+07	0.460069
sp|Q9Y696|CLIC4_HUMAN	130	>sp|Q9Y696|CLIC4_HUMAN Chloride intracellular channel protein 4 OS=Homo sapiens OX=9606 GN=CLIC4 PE=1 SV=4	5.62733e-05	1	K	FSAYIK(1)NSRPEANEALER	3	0.67593	6.50522e+06	5.52989e+06	-0.234349	8826700	6.41732e+06	0.459903
sp|Q01650|LAT1_HUMAN	30	>sp|Q01650|LAT1_HUMAN Large neutral amino acids transporter small subunit 1 OS=Homo sapiens OX=9606 GN=SLC7A5 PE=1 SV=2	2.57628e-300	1;2	K	MLAAK(1)SADGSAPAGEGEGVTLQR	3	0.043482	1.13603e+09	3.90526e+08	-1.54051	2118100000	1.54173e+09	0.45822
sp|Q86Y82|STX12_HUMAN	53	>sp|Q86Y82|STX12_HUMAN Syntaxin-12 OS=Homo sapiens OX=9606 GN=STX12 PE=1 SV=1	0.000457175	1	K	NLMSQLGTK(0.993)QDSSK(0.007)	3	-0.73526	1	1	0	11366000	8.28033e+06	0.456965
sp|P60900|PSA6_HUMAN	55	>sp|P60900|PSA6_HUMAN Proteasome subunit alpha type-6 OS=Homo sapiens OX=9606 GN=PSMA6 PE=1 SV=1	2.46791e-12	1	K	K(1)VPDKLLDSSTVTHLFK	4	0.070036	1.41209e+08	1.89979e+08	0.428005	296320000	2.1618e+08	0.454926
sp|P43121|MUC18_HUMAN	605	>sp|P43121|MUC18_HUMAN Cell surface glycoprotein MUC18 OS=Homo sapiens OX=9606 GN=MCAM PE=1 SV=2	0.00219431	1	K	K(1)SELVVEVK	2	0.51398	1	1.54333e+06	20.5576	44567000	3.25296e+07	0.454223
sp|P33121|ACSL1_HUMAN	386	>sp|P33121|ACSL1_HUMAN Long-chain-fatty-acid--CoA ligase 1 OS=Homo sapiens OX=9606 GN=ACSL1 PE=1 SV=1	5.29789e-05	1	K	IFGQANTTLK(1)R	2	0.65785	1	1	0	3593200	2.62312e+06	0.453987
sp|Q01831|XPC_HUMAN	359	>sp|Q01831|XPC_HUMAN DNA repair protein complementing XP-C cells OS=Homo sapiens OX=9606 GN=XPC PE=1 SV=4	4.93652e-06	1	K	LTADPGGSSETSSQVLENHTK(0.814)PK(0.186)	4	0.3271	1.67037e+07	1.32971e+07	-0.329056	30198000	2.20506e+07	0.453638
sp|P52597|HNRPF_HUMAN	185	>sp|P52597|HNRPF_HUMAN Heterogeneous nuclear ribonucleoprotein F OS=Homo sapiens OX=9606 GN=HNRNPF PE=1 SV=3	3.77905e-06	1	K	YIEVFK(1)SSQEEVR	2	1.3943	7.0379e+07	5.28035e+07	-0.414513	23115000	1.69045e+07	0.451419
sp|P54578|UBP14_HUMAN	224	>sp|P54578|UBP14_HUMAN Ubiquitin carboxyl-terminal hydrolase 14 OS=Homo sapiens OX=9606 GN=USP14 PE=1 SV=3	2.03203e-30	1	K	LEAIEDDSVK(1)ETDSSSASAATPSK	3	0.23392	1.76235e+07	2.02883e+07	0.203147	19764000	1.44556e+07	0.451251
sp|P49773|HINT1_HUMAN	30	>sp|P49773|HINT1_HUMAN Histidine triad nucleotide-binding protein 1 OS=Homo sapiens OX=9606 GN=HINT1 PE=1 SV=2	0.00447496	1	K	EIPAK(1)IIFEDDR	2	-1.8985	1.80587e+07	1.35471e+07	-0.414703	10028000	7.33935e+06	0.450309
sp|Q96GF1|RN185_HUMAN	80	>sp|Q96GF1|RN185_HUMAN E3 ubiquitin-protein ligase RNF185 OS=Homo sapiens OX=9606 GN=RNF185 PE=1 SV=1	8.06934e-14	1	K	QVCPVCK(1)AGISR	3	-0.33374	8.05261e+06	7.90334e+06	-0.0269947	26364000	1.93095e+07	0.449257
sp|O15173|PGRC2_HUMAN	126	>sp|O15173|PGRC2_HUMAN Membrane-associated progesterone receptor component 2 OS=Homo sapiens OX=9606 GN=PGRMC2 PE=1 SV=1	8.81463e-05	1	K	ILLAVNGK(1)VFDVTK	3	0.75636	1.78767e+07	1	-24.0916	9865400	7.23169e+06	0.448045
sp|O75475|PSIP1_HUMAN	329	>sp|O75475|PSIP1_HUMAN PC4 and SFRS1-interacting protein OS=Homo sapiens OX=9606 GN=PSIP1 PE=1 SV=1	0.000375462	1	K	K(0.008)QEEQMETEQQNK(0.815)DEGK(0.086)K(0.084)PEVK(0.007)	5	-0.24584	3.35282e+06	6.23858e+06	0.895843	1656600	1.2154e+06	0.446799
sp|P49327|FAS_HUMAN	2449	>sp|P49327|FAS_HUMAN Fatty acid synthase OS=Homo sapiens OX=9606 GN=FASN PE=1 SV=3	1.50425e-58	1	K	AK(1)TGGAYGEDLGADYNLSQVCDGK	3	-0.63544	1.19994e+08	8.57045e+07	-0.485516	42414000	3.1167e+07	0.444521
sp|Q9Y289|SC5A6_HUMAN	579	>sp|Q9Y289|SC5A6_HUMAN Sodium-dependent multivitamin transporter OS=Homo sapiens OX=9606 GN=SLC5A6 PE=2 SV=2	7.22719e-18	1	K	LLSLLPLSCQK(1)R	3	1.2452	1.08709e+07	6.81915e+06	-0.672801	53093000	3.90174e+07	0.444403
sp|Q96A33|CCD47_HUMAN	189	>sp|Q96A33|CCD47_HUMAN Coiled-coil domain-containing protein 47 OS=Homo sapiens OX=9606 GN=CCDC47 PE=1 SV=1	6.65373e-06	1	K	ELLESNFTLVGDDGTNK(0.992)EATSTGK(0.008)	3	-0.89704	9.4482e+06	9.6107e+06	0.0246019	17994000	1.3225e+07	0.444253
sp|Q9BXS9|S26A6_HUMAN	629	>sp|Q9BXS9|S26A6_HUMAN Solute carrier family 26 member 6 OS=Homo sapiens OX=9606 GN=SLC26A6 PE=1 SV=1	1.55705e-30	1	K	SNNVEDCK(1)MMQVSSGDKMEDATANGQEDSKAPDGSTLK	5	0.064568	1	1	0	49874000	3.67041e+07	0.442347
sp|Q9UMX9|S45A2_HUMAN	178	>sp|Q9UMX9|S45A2_HUMAN Membrane-associated transporter protein OS=Homo sapiens OX=9606 GN=SLC45A2 PE=1 SV=2	7.78999e-05	1	K	AYLFDVCSHQDK(0.136)EK(0.864)	3	-1.2813	1.26083e+07	5.20574e+06	-1.2762	5178200	3.8129e+06	0.441562
sp|Q8WUM9|S20A1_HUMAN	320	>sp|Q8WUM9|S20A1_HUMAN Sodium-dependent phosphate transporter 1 OS=Homo sapiens OX=9606 GN=SLC20A1 PE=1 SV=1	0.00068005	1	K	TVSFK(1)LGDLEEAPER	3	-0.63415	3.74272e+07	2.58821e+07	-0.532133	4739600	3.49089e+06	0.44117
sp|O75165|DJC13_HUMAN	210	>sp|O75165|DJC13_HUMAN DnaJ homolog subfamily C member 13 OS=Homo sapiens OX=9606 GN=DNAJC13 PE=1 SV=5	1.61986e-24	1	K	K(1)EPLEFEQYLNLR	3	-0.34404	1.29202e+07	2.67712e+07	1.05105	4722900	3.47867e+06	0.441137
sp|P49757|NUMB_HUMAN	174	>sp|P49757|NUMB_HUMAN Protein numb homolog OS=Homo sapiens OX=9606 GN=NUMB PE=1 SV=2	0.000462971	1	K	EK(1)ECGVTATFDASR	2	-1.4333	5.71799e+06	4.53976e+06	-0.332894	11788000	8.68788e+06	0.440243
sp|Q8NBI5|S43A3_HUMAN	255	>sp|Q8NBI5|S43A3_HUMAN Solute carrier family 43 member 3 OS=Homo sapiens OX=9606 GN=SLC43A3 PE=1 SV=2	8.18952e-11	1	K	EFLSAK(1)EETPGAGQK	2	1.1356	1	1	0	176600000	1.3027e+08	0.438982
sp|P62277|RS13_HUMAN	43	>sp|P62277|RS13_HUMAN 40S ribosomal protein S13 OS=Homo sapiens OX=9606 GN=RPS13 PE=1 SV=2	0.000697751	1	K	K(1)GLTPSQIGVILR	3	0.90642	1	8.76792e+06	23.0638	9030500	6.66307e+06	0.438618
sp|O15173|PGRC2_HUMAN	202	>sp|O15173|PGRC2_HUMAN Membrane-associated progesterone receptor component 2 OS=Homo sapiens OX=9606 GN=PGRMC2 PE=1 SV=1	0.00310235	1	K	LLK(1)PGEEPSEYTDEEDTKDHNKQD	4	0.30875	1	8.74477e+06	23.06	11964000	8.83073e+06	0.438094
sp|Q9BRY0|S39A3_HUMAN	36	>sp|Q9BRY0|S39A3_HUMAN Zinc transporter ZIP3 OS=Homo sapiens OX=9606 GN=SLC39A3 PE=1 SV=2	7.23917e-05	1	K	IIETDFEK(1)AHR	2	1.4699	1	1	0	5290900	3.90553e+06	0.437995
sp|P04792|HSPB1_HUMAN	198	>sp|P04792|HSPB1_HUMAN Heat shock protein beta-1 OS=Homo sapiens OX=9606 GN=HSPB1 PE=1 SV=2	2.94739e-23	1	K	AQLGGPEAAK(1)SDETAAK	2	-0.23209	8.73316e+06	1.39927e+07	0.6801	4986100	3.68727e+06	0.435357
sp|Q02878|RL6_HUMAN	262	>sp|Q02878|RL6_HUMAN 60S ribosomal protein L6 OS=Homo sapiens OX=9606 GN=RPL6 PE=1 SV=3	5.27205e-13	1	K	IK(1)AIPQLQGYLR	3	-1.2557	1.20209e+08	1.9818e+08	0.721266	87266000	6.45386e+07	0.435258
sp|Q6W2J9|BCOR_HUMAN	1460	>sp|Q6W2J9|BCOR_HUMAN BCL-6 corepressor OS=Homo sapiens OX=9606 GN=BCOR PE=1 SV=1	1.03234e-54	1	K	LIVNK(1)NAGETLLQR	2	0.43655	2.86147e+09	1.85503e+09	-0.625318	1713600000	1.26738e+09	0.435179
sp|P62888|RL30_HUMAN	68	>sp|P62888|RL30_HUMAN 60S ribosomal protein L30 OS=Homo sapiens OX=9606 GN=RPL30 PE=1 SV=2	6.52631e-150	1;2	K	KSEIEYYAMLAK(1)TGVHHYSGNNIELGTACGK	4	0.12252	3.24264e+07	6.81987e+07	1.07258	272710000	2.01711e+08	0.435081
sp|Q6ZVM7|TM1L2_HUMAN	106	>sp|Q6ZVM7|TM1L2_HUMAN TOM1-like protein 2 OS=Homo sapiens OX=9606 GN=TOM1L2 PE=1 SV=1	7.12272e-11	1	K	IISPK(1)NNPPTIVQDK	3	0.51691	9.51093e+07	8.33553e+07	-0.190312	38670000	2.86044e+07	0.434978
sp|Q15012|LAP4A_HUMAN	224	>sp|Q15012|LAP4A_HUMAN Lysosomal-associated transmembrane protein 4A OS=Homo sapiens OX=9606 GN=LAPTM4A PE=1 SV=1	4.3597e-05	1	K	MPEK(1)EPPPPYLPA	2	0.31366	1	1	0	222120000	1.6434e+08	0.434651
sp|O75694|NU155_HUMAN	540	>sp|O75694|NU155_HUMAN Nuclear pore complex protein Nup155 OS=Homo sapiens OX=9606 GN=NUP155 PE=1 SV=1	2.94201e-13	1	K	FFK(1)LHQEDQACATCLILACSTAACDR	4	-1.355	5.98797e+07	5.32233e+07	-0.170009	26312000	1.94696e+07	0.434497
sp|Q09161|NCBP1_HUMAN	583	>sp|Q09161|NCBP1_HUMAN Nuclear cap-binding protein subunit 1 OS=Homo sapiens OX=9606 GN=NCBP1 PE=1 SV=1	0.010695		K	TLAESDEGK(1)LHVLR	3	0.43065	1	1	0	11147000	8.25307e+06	0.433652
sp|O75643|U520_HUMAN	770	>sp|O75643|U520_HUMAN U5 small nuclear ribonucleoprotein 200 kDa helicase OS=Homo sapiens OX=9606 GN=SNRNP200 PE=1 SV=2	1.2666e-17	1	K	TEAEQCK(1)NLELK	2	-0.88024	2.77488e+07	2.21169e+07	-0.327276	16975000	1.25712e+07	0.433293
sp|Q15388|TOM20_HUMAN	61	>sp|Q15388|TOM20_HUMAN Mitochondrial import receptor subunit TOM20 homolog OS=Homo sapiens OX=9606 GN=TOMM20 PE=1 SV=1	0.000414603	1	K	LPDLK(1)DAEAVQK	3	0.35032	1	1	0	39379000	2.91714e+07	0.432871
sp|O95721|SNP29_HUMAN	126	>sp|O95721|SNP29_HUMAN Synaptosomal-associated protein 29 OS=Homo sapiens OX=9606 GN=SNAP29 PE=1 SV=1	4.22322e-05	1	K	SK(1)PVETPPEQNGTLTSQPNNR	3	0.47063	1	1	0	36260000	2.6863e+07	0.43276
sp|Q7Z6Z7|HUWE1_HUMAN	3452	>sp|Q7Z6Z7|HUWE1_HUMAN E3 ubiquitin-protein ligase HUWE1 OS=Homo sapiens OX=9606 GN=HUWE1 PE=1 SV=3	0.00134215	1	K	SSLLTEK(1)LLR	2	-0.10835	2.30638e+07	2.03655e+07	-0.179506	24480000	1.81388e+07	0.432525
sp|Q9NVJ2|ARL8B_HUMAN	141	>sp|Q9NVJ2|ARL8B_HUMAN ADP-ribosylation factor-like protein 8B OS=Homo sapiens OX=9606 GN=ARL8B PE=1 SV=1	9.99395e-24	1	K	DLPNALDEK(1)QLIEK	2	0.76299	8.58791e+09	2.29298e+09	-1.90508	375430000	2.78223e+08	0.432303
sp|Q99460|PSMD1_HUMAN	302	>sp|Q99460|PSMD1_HUMAN 26S proteasome non-ATPase regulatory subunit 1 OS=Homo sapiens OX=9606 GN=PSMD1 PE=1 SV=2	4.37493e-61	1	K	DSDSMETEEK(1)TSSAFVGK	3	-0.66239	1.50649e+07	1.05475e+07	-0.514287	11502000	8.53329e+06	0.430711
sp|Q3SXM5|HSDL1_HUMAN	109	>sp|Q3SXM5|HSDL1_HUMAN Inactive hydroxysteroid dehydrogenase-like protein 1 OS=Homo sapiens OX=9606 GN=HSDL1 PE=1 SV=3	0.00958972	1	K	LQVVAK(0.997)DIADTYK(0.003)	3	-1.0341	2.32457e+07	1.326e+07	-0.809881	22026000	1.63461e+07	0.430264
sp|P43007|SATT_HUMAN	501	>sp|P43007|SATT_HUMAN Neutral amino acid transporter A OS=Homo sapiens OX=9606 GN=SLC1A4 PE=1 SV=1	1.02839e-55	1	K	VEAIPNCK(1)SEEETSPLVTHQNPAGPVASAPELESK	3	-0.18105	1	1	0	41097000	3.05193e+07	0.42931
sp|Q9Y5V3|MAGD1_HUMAN	656	>sp|Q9Y5V3|MAGD1_HUMAN Melanoma-associated antigen D1 OS=Homo sapiens OX=9606 GN=MAGED1 PE=1 SV=3	0.00336073	1	K	FIAEVQK(1)R	2	0.24733	3.32647e+07	5.97165e+07	0.844135	12515000	9.29988e+06	0.428375
sp|Q96BM9|ARL8A_HUMAN	141	>sp|Q96BM9|ARL8A_HUMAN ADP-ribosylation factor-like protein 8A OS=Homo sapiens OX=9606 GN=ARL8A PE=1 SV=1	1.99211e-15	1	K	DLPGALDEK(1)ELIEK	2	0.1237	6.90866e+08	2.80739e+08	-1.29918	120840000	8.97982e+07	0.428339
sp|O75955|FLOT1_HUMAN	220	>sp|O75955|FLOT1_HUMAN Flotillin-1 OS=Homo sapiens OX=9606 GN=FLOT1 PE=1 SV=3	0.000836171	1	K	K(1)AAYDIEVNTR	3	2.3544	1	6.99285e+06	22.7374	43786000	3.25418e+07	0.428175
sp|Q7Z6Z7|HUWE1_HUMAN	3345	>sp|Q7Z6Z7|HUWE1_HUMAN E3 ubiquitin-protein ligase HUWE1 OS=Homo sapiens OX=9606 GN=HUWE1 PE=1 SV=3	1.56978e-89	1	K	HVLDTLIQLAK(1)VFPSHFTQQR	4	0.064689	6.84259e+07	5.82162e+07	-0.233122	105860000	7.86972e+07	0.427773
sp|Q5DX21|IGS11_HUMAN	297	>sp|Q5DX21|IGS11_HUMAN Immunoglobulin superfamily member 11 OS=Homo sapiens OX=9606 GN=IGSF11 PE=2 SV=3	1.44491e-10	1	K	CSSAK(1)AFHTEISSSDNNTLTSSNAYNSR	4	-0.88813	1	1	0	32461000	2.4139e+07	0.427339
sp|P30455|1A36_HUMAN;sp|P30443|1A01_HUMAN	68;68	>sp|P30455|1A36_HUMAN HLA class I histocompatibility antigen, A-36 alpha chain OS=Homo sapiens OX=9606 GN=HLA-A PE=1 SV=1;>sp|P30443|1A01_HUMAN HLA class I histocompatibility antigen, A-1 alpha chain OS=Homo sapiens OX=9606 GN=HLA-A PE=1 SV=1	4.12188e-06	1	K	FDSDAASQK(1)MEPR	2	-0.051856	8.73607e+06	1.8365e+07	1.07191	63400000	4.71587e+07	0.42696
sp|Q15366|PCBP2_HUMAN	115	>sp|Q15366|PCBP2_HUMAN Poly(rC)-binding protein 2 OS=Homo sapiens OX=9606 GN=PCBP2 PE=1 SV=1	2.27204e-05	1	K	LVVPASQCGSLIGK(0.848)GGCK(0.152)	3	-0.60377	3.07483e+07	3.30544e+07	0.104334	26366000	1.96138e+07	0.426809
sp|Q9UHI5|LAT2_HUMAN	13	>sp|Q9UHI5|LAT2_HUMAN Large neutral amino acids transporter small subunit 2 OS=Homo sapiens OX=9606 GN=SLC7A8 PE=1 SV=1	5.83381e-48	1;2	K	NNTEK(1)K(1)HPGGGESDASPEAGSGGGGVALKK	5	0.50264	1	1	0	26135000	1.94537e+07	0.425937
sp|O75663|TIPRL_HUMAN	128	>sp|O75663|TIPRL_HUMAN TIP41-like protein OS=Homo sapiens OX=9606 GN=TIPRL PE=1 SV=2	6.02046e-05	1	K	LK(1)VVPTTDHIDTEK	3	1.2939	1	6.61119e+06	22.6565	39470000	2.93828e+07	0.425783
sp|Q658P3|STEA3_HUMAN	472	>sp|Q658P3|STEA3_HUMAN Metalloreductase STEAP3 OS=Homo sapiens OX=9606 GN=STEAP3 PE=1 SV=2	2.49456e-08	1;2	K	ESTIK(1)FTLPTDHALAEK(1)TSHV	4	0.58447	2.57417e+08	8.59988e+07	-1.58172	88063000	6.57484e+07	0.42158
sp|Q86VP1|TAXB1_HUMAN	571	>sp|Q86VP1|TAXB1_HUMAN Tax1-binding protein 1 OS=Homo sapiens OX=9606 GN=TAX1BP1 PE=1 SV=2	0.0166208	1	K	EQVK(1)IAENVK	2	-0.094084	2.16302e+06	1	-21.0446	23019000	1.71917e+07	0.421112
sp|P24928|RPB1_HUMAN	710	>sp|P24928|RPB1_HUMAN DNA-directed RNA polymerase II subunit RPB1 OS=Homo sapiens OX=9606 GN=POLR2A PE=1 SV=2	0.00382757	1	K	AK(1)QDVIEVIEK	3	0.99291	6.97474e+06	1.08326e+07	0.635164	336180	251179	0.420518
sp|O14964|HGS_HUMAN	86	>sp|O14964|HGS_HUMAN Hepatocyte growth factor-regulated tyrosine kinase substrate OS=Homo sapiens OX=9606 GN=HGS PE=1 SV=1	2.9522e-72	1	K	NCGQTVHDEVANK(1)QTMEELK	3	0.44905	1.60604e+07	7.83213e+06	-1.03603	23368000	1.74618e+07	0.420333
sp|P48444|COPD_HUMAN	142	>sp|P48444|COPD_HUMAN Coatomer subunit delta OS=Homo sapiens OX=9606 GN=ARCN1 PE=1 SV=1	3.08853e-21	1	K	TFTEMDSHEEK(1)VFR	3	-0.12097	4.54596e+06	6.84498e+06	0.590463	36006000	2.6907e+07	0.420258
sp|P67809|YBOX1_HUMAN	137	>sp|P67809|YBOX1_HUMAN Nuclease-sensitive element-binding protein 1 OS=Homo sapiens OX=9606 GN=YBX1 PE=1 SV=3	5.89621e-06	1	K	GAEAANVTGPGGVPVQGSK(1)YAADR	3	0.30152	2.85114e+07	1.9073e+07	-0.580006	29552000	2.21031e+07	0.419006
sp|P49321|NASP_HUMAN	405	>sp|P49321|NASP_HUMAN Nuclear autoantigenic sperm protein OS=Homo sapiens OX=9606 GN=NASP PE=1 SV=2	0.000110773	1	K	LTETK(1)DGSGLEEK	3	-1.9588	9.32289e+06	7.22655e+06	-0.367471	3520500	2.6346e+06	0.418194
sp|Q92769|HDAC2_HUMAN	243	>sp|Q92769|HDAC2_HUMAN Histone deacetylase 2 OS=Homo sapiens OX=9606 GN=HDAC2 PE=1 SV=2	5.59568e-06	1	K	DGIDDESYGQIFK(0.996)PIISK(0.004)	3	-0.054962	1.88693e+07	1.25562e+07	-0.587645	25758000	1.9279e+07	0.417993
sp|Q9H6A9|PCX3_HUMAN	93	>sp|Q9H6A9|PCX3_HUMAN Pecanex-like protein 3 OS=Homo sapiens OX=9606 GN=PCNX3 PE=1 SV=2	0.00244745	1	K	LHAMFDQGEIVEK(1)R	4	-0.42744	1	4.80473e+06	22.196	10769000	8.06072e+06	0.417903
sp|P05455|LA_HUMAN	216	>sp|P05455|LA_HUMAN Lupus La protein OS=Homo sapiens OX=9606 GN=SSB PE=1 SV=2	0.0170421	1	K	QK(1)LEEDAEMK	3	1.1437	5.55877e+06	8.99019e+06	0.693586	2528500	1.89405e+06	0.41681
sp|P04921|GLPC_HUMAN	97	>sp|P04921|GLPC_HUMAN Glycophorin-C OS=Homo sapiens OX=9606 GN=GYPC PE=1 SV=1	4.15171e-36	1	K	GTYHTNEAK(1)GTEFAESADAALQGDPALQDAGDSSR	4	-1.8996	1	1	0	66265000	4.9659e+07	0.416192
sp|Q9BV40|VAMP8_HUMAN	47	>sp|Q9BV40|VAMP8_HUMAN Vesicle-associated membrane protein 8 OS=Homo sapiens OX=9606 GN=VAMP8 PE=1 SV=1	1.3978e-18	1	K	NK(1)TEDLEATSEHFK	3	-0.61214	1	1	0	302360000	2.26701e+08	0.415474
sp|Q93008|USP9X_HUMAN	1627	>sp|Q93008|USP9X_HUMAN Probable ubiquitin carboxyl-terminal hydrolase FAF-X OS=Homo sapiens OX=9606 GN=USP9X PE=1 SV=3	2.09858e-20	1	K	DDVFGYPQQFEDK(1)PALSK	3	-0.39179	1.1584e+07	1.17515e+07	0.0207089	24265000	1.8195e+07	0.415334
sp|Q9UMX9|S45A2_HUMAN	14	>sp|Q9UMX9|S45A2_HUMAN Membrane-associated transporter protein OS=Homo sapiens OX=9606 GN=SLC45A2 PE=1 SV=2	1.29415e-139	1	K	HIYK(1)SLADDGPFDSVEPPKRPTSR	5	-0.49694	1	1	0	62962000	4.73249e+07	0.411883
sp|P39023|RL3_HUMAN	286	>sp|P39023|RL3_HUMAN 60S ribosomal protein L3 OS=Homo sapiens OX=9606 GN=RPL3 PE=1 SV=2	4.98256e-09	1	K	IYK(1)IGQGYLIK	3	0.19317	4.98549e+07	5.62126e+07	0.173159	111200000	8.35841e+07	0.411856
sp|P36897|TGFR1_HUMAN	449	>sp|P36897|TGFR1_HUMAN TGF-beta receptor type-1 OS=Homo sapiens OX=9606 GN=TGFBR1 PE=1 SV=1	0.00019484		K	VVCEQK(1)LRPNIPNR	3	0.75304	1	1	0	5754800	4.32652e+06	0.411557
sp|P13591|NCAM1_HUMAN	785	>sp|P13591|NCAM1_HUMAN Neural cell adhesion molecule 1 OS=Homo sapiens OX=9606 GN=NCAM1 PE=1 SV=3	1.35721e-05	1	K	AAFSK(0.016)DESK(0.984)EPIVEVR	3	0.49689	2.30725e+06	1	-21.1377	41939000	3.15348e+07	0.411346
sp|Q14151|SAFB2_HUMAN	531	>sp|Q14151|SAFB2_HUMAN Scaffold attachment factor B2 OS=Homo sapiens OX=9606 GN=SAFB2 PE=1 SV=1	0.00598171	2	K	KEEK(0.001)IEK(0.993)K(0.993)EEK(0.014)	3	2.3433	9.06295e+06	4.60212e+06	-0.977684	21906000	1.65159e+07	0.407468
sp|Q14151|SAFB2_HUMAN	532	>sp|Q14151|SAFB2_HUMAN Scaffold attachment factor B2 OS=Homo sapiens OX=9606 GN=SAFB2 PE=1 SV=1	0.00598171	2	K	KEEK(0.001)IEK(0.993)K(0.993)EEK(0.014)	3	2.3433	9.06295e+06	4.60212e+06	-0.977684	21906000	1.65159e+07	0.407468
sp|O60488|ACSL4_HUMAN	498	>sp|O60488|ACSL4_HUMAN Long-chain-fatty-acid--CoA ligase 4 OS=Homo sapiens OX=9606 GN=ACSL4 PE=1 SV=2	0.00021431	1	K	VGAPLICCEIK(0.969)LK(0.031)	3	-1.1818	1	1	0	24069000	1.81474e+07	0.407417
sp|P62979|RS27A_HUMAN;sp|P62987|RL40_HUMAN;sp|P0CG47|UBB_HUMAN;sp|P0CG48|UBC_HUMAN	27;27;27;27	>sp|P62979|RS27A_HUMAN Ubiquitin-40S ribosomal protein S27a OS=Homo sapiens OX=9606 GN=RPS27A PE=1 SV=2;>sp|P62987|RL40_HUMAN Ubiquitin-60S ribosomal protein L40 OS=Homo sapiens OX=9606 GN=UBA52 PE=1 SV=2;>sp|P0CG47|UBB_HUMAN Polyubiquitin-B OS=Homo sapien	2.98116e-97	1;2	K	TLTGK(1)TITLEVEPSDTIENVK(0.972)AK(0.028)	3	-0.16829	6.44963e+09	3.54829e+09	-0.862092	2732600000	2.06049e+09	0.407288
sp|O00422|SAP18_HUMAN	74	>sp|O00422|SAP18_HUMAN Histone deacetylase complex subunit SAP18 OS=Homo sapiens OX=9606 GN=SAP18 PE=1 SV=1	3.99113e-06	1	K	ELTSLVK(1)EVYPEAR	3	-0.29706	6.07297e+06	3.47194e+06	-0.806662	5603300	4.22595e+06	0.407001
sp|P16615|AT2A2_HUMAN	995	>sp|P16615|AT2A2_HUMAN Sarcoplasmic/endoplasmic reticulum calcium ATPase 2 OS=Homo sapiens OX=9606 GN=ATP2A2 PE=1 SV=1	3.3329e-06	1	K	NYLEPGK(1)ECVQPATK	3	0.30561	1.99696e+07	2.52328e+07	0.337492	102560000	7.73615e+07	0.406781
sp|O00161|SNP23_HUMAN	100	>sp|O00161|SNP23_HUMAN Synaptosomal-associated protein 23 OS=Homo sapiens OX=9606 GN=SNAP23 PE=1 SV=1	8.7311e-05	1	K	AYK(1)TTWGDGGENSPCNVVSK	3	2.2963	2.06537e+07	1.29215e+07	-0.676625	30448000	2.29695e+07	0.406626
sp|Q709C8|VP13C_HUMAN	1382	>sp|Q709C8|VP13C_HUMAN Vacuolar protein sorting-associated protein 13C OS=Homo sapiens OX=9606 GN=VPS13C PE=1 SV=1	2.15471e-36	1	K	ILTENLCEGTEDLDK(0.023)VK(0.977)PR	3	0.5519	1.78578e+08	6.6968e+07	-1.41501	5356700	4.04472e+06	0.405304
sp|P26038|MOES_HUMAN	139	>sp|P26038|MOES_HUMAN Moesin OS=Homo sapiens OX=9606 GN=MSN PE=1 SV=3	5.40954e-21	1	K	YGDFNK(1)EVHK	2	-0.010004	2.71622e+08	2.39146e+08	-0.183711	1201900000	9.076e+08	0.405189
sp|P60660|MYL6_HUMAN	81	>sp|P60660|MYL6_HUMAN Myosin light polypeptide 6 OS=Homo sapiens OX=9606 GN=MYL6 PE=1 SV=2	8.42576e-27	1	K	NK(1)DQGTYEDYVEGLR	2	0.67727	1.71869e+07	1.09602e+07	-0.649038	7811100	5.90553e+06	0.40346
sp|P49790|NU153_HUMAN	353	>sp|P49790|NU153_HUMAN Nuclear pore complex protein Nup153 OS=Homo sapiens OX=9606 GN=NUP153 PE=1 SV=2	0.000194796	1	K	SGIDITDFQAK(1)R	3	-1.0807	1	9.66441e+06	23.2043	22221000	1.68129e+07	0.402357
sp|Q96JI7|SPTCS_HUMAN	1577	>sp|Q96JI7|SPTCS_HUMAN Spatacsin OS=Homo sapiens OX=9606 GN=SPG11 PE=1 SV=3	1.19784e-05	1	K	LLEFQK(1)SLETLNTAATK	3	-0.18087	1	1.16867e+07	23.4784	38612000	2.92203e+07	0.402079
sp|P04626|ERBB2_HUMAN;sp|Q15303|ERBB4_HUMAN	937;935	>sp|P04626|ERBB2_HUMAN Receptor tyrosine-protein kinase erbB-2 OS=Homo sapiens OX=9606 GN=ERBB2 PE=1 SV=1;>sp|Q15303|ERBB4_HUMAN Receptor tyrosine-protein kinase erbB-4 OS=Homo sapiens OX=9606 GN=ERBB4 PE=1 SV=1	0.000453936	1	K	EIPDLLEK(1)GER	3	0.22673	1.97731e+07	1.75089e+07	-0.175454	29367000	2.2229e+07	0.401754
sp|Q08357|S20A2_HUMAN	370	>sp|Q08357|S20A2_HUMAN Sodium-dependent phosphate transporter 2 OS=Homo sapiens OX=9606 GN=SLC20A2 PE=1 SV=1	7.21998e-11	1	K	IHIDRGPEEK(1)PAQESNYR	4	1.4219	1.1491e+08	6.53072e+07	-0.815191	41859000	3.16888e+07	0.401564
sp|Q08752|PPID_HUMAN	285	>sp|Q08752|PPID_HUMAN Peptidyl-prolyl cis-trans isomerase D OS=Homo sapiens OX=9606 GN=PPID PE=1 SV=3	2.79125e-07	1	K	LQPIALSCVLNIGACK(0.389)LK(0.611)	3	-0.69668	1	1.24615e+07	23.571	5129300	3.88586e+06	0.40053
sp|Q9UP95|S12A4_HUMAN	97	>sp|Q9UP95|S12A4_HUMAN Solute carrier family 12 member 4 OS=Homo sapiens OX=9606 GN=SLC12A4 PE=1 SV=2	2.6241e-31	1	K	LVSYTNLTQGAK(1)EHEEAESGEGTR	4	-0.13791	3.23173e+07	1.85225e+07	-0.803028	16904000	1.2807e+07	0.40043
sp|Q92783|STAM1_HUMAN	162	>sp|Q92783|STAM1_HUMAN Signal transducing adapter molecule 1 OS=Homo sapiens OX=9606 GN=STAM PE=1 SV=3	1.12167e-101	1	K	ASPALVAK(1)DPGTVANKKEEEDLAK	4	-0.074606	1.22199e+08	9.57643e+07	-0.351669	96911000	7.34852e+07	0.399207
sp|Q99933|BAG1_HUMAN	273	>sp|Q99933|BAG1_HUMAN BAG family molecular chaperone regulator 1 OS=Homo sapiens OX=9606 GN=BAG1 PE=1 SV=4	0.000264326	1	K	DLQAEALCK(1)LDRR	3	-0.36957	1.56936e+07	8.72347e+06	-0.847205	18802000	1.42637e+07	0.398538
sp|P49720|PSB3_HUMAN	77	>sp|P49720|PSB3_HUMAN Proteasome subunit beta type-3 OS=Homo sapiens OX=9606 GN=PSMB3 PE=1 SV=2	0.00608982	1	K	LNLYELK(1)EGR	3	0.33691	1.9533e+07	2.1164e+07	0.115699	43301000	3.2851e+07	0.398464
sp|Q9UJY5|GGA1_HUMAN	174	>sp|Q9UJY5|GGA1_HUMAN ADP-ribosylation factor-binding protein GGA1 OS=Homo sapiens OX=9606 GN=GGA1 PE=1 SV=1	0.0166498	1	K	NVIFEDEEK(0.751)SK(0.249)	3	0.89481	4.08489e+06	1	-21.9619	10096000	7.66014e+06	0.398341
sp|Q9Y2J2|E41L3_HUMAN	65	>sp|Q9Y2J2|E41L3_HUMAN Band 4.1-like protein 3 OS=Homo sapiens OX=9606 GN=EPB41L3 PE=1 SV=2	9.1651e-07	1	K	EVTDK(1)EQEFAAR	3	-1.1102	1	1	0	192570000	1.4612e+08	0.398231
sp|Q16655|MAR1_HUMAN	60	>sp|Q16655|MAR1_HUMAN Melanoma antigen recognized by T-cells 1 OS=Homo sapiens OX=9606 GN=MLANA PE=1 SV=1	2.73388e-164	1	K	ALMDK(1)SLHVGTQCALTR	4	-0.30165	3.21033e+06	3.76418e+06	0.229613	3052900000	2.31712e+09	0.397849
sp|Q15233|NONO_HUMAN	198	>sp|Q15233|NONO_HUMAN Non-POU domain-containing octamer-binding protein OS=Homo sapiens OX=9606 GN=NONO PE=1 SV=4	0.00157514	1	K	GIVEFSGK(1)PAAR	3	0.96751	9.24837e+06	5.96619e+06	-0.632388	17293000	1.3126e+07	0.397764
sp|P04406|G3P_HUMAN	107	>sp|P04406|G3P_HUMAN Glyceraldehyde-3-phosphate dehydrogenase OS=Homo sapiens OX=9606 GN=GAPDH PE=1 SV=3	4.65955e-62	1	K	WGDAGAEYVVESTGVFTTMEK(1)AGAHLQGGAK	4	-0.53775	2.93599e+06	3.38756e+06	0.206398	14590000	1.10871e+07	0.396096
sp|Q93096|TP4A1_HUMAN;sp|Q12974|TP4A2_HUMAN	144;141	>sp|Q93096|TP4A1_HUMAN Protein tyrosine phosphatase type IVA 1 OS=Homo sapiens OX=9606 GN=PTP4A1 PE=1 SV=2;>sp|Q12974|TP4A2_HUMAN Protein tyrosine phosphatase type IVA 2 OS=Homo sapiens OX=9606 GN=PTP4A2 PE=1 SV=1	1.06404e-05	1	K	GAFNSK(1)QLLYLEK	3	0.30439	1	1	0	96836000	7.36086e+07	0.395669
sp|Q9NYM9|BET1L_HUMAN	22	>sp|Q9NYM9|BET1L_HUMAN BET1-like protein OS=Homo sapiens OX=9606 GN=BET1L PE=1 SV=1	3.47197e-12	1	K	AQSPGAVEEILDRENK(1)R	4	-0.062779	3.81927e+07	3.43469e+07	-0.15312	12858000	9.79334e+06	0.392794
sp|Q9H0E2|TOLIP_HUMAN	63	>sp|Q9H0E2|TOLIP_HUMAN Toll-interacting protein OS=Homo sapiens OX=9606 GN=TOLLIP PE=1 SV=1	2.1648e-13	1	K	LNITVVQAK(1)LAK	3	0.027367	1.62671e+08	1.68719e+08	0.0526706	515930000	3.93242e+08	0.39176
sp|Q9UBB4|ATX10_HUMAN	262	>sp|Q9UBB4|ATX10_HUMAN Ataxin-10 OS=Homo sapiens OX=9606 GN=ATXN10 PE=1 SV=1	8.54834e-99	1	K	ITSDEPLTK(1)DDIPVFLR	3	-0.81944	2.22939e+08	1.47346e+08	-0.597437	315830000	2.40926e+08	0.390558
sp|P51784|UBP11_HUMAN	531	>sp|P51784|UBP11_HUMAN Ubiquitin carboxyl-terminal hydrolase 11 OS=Homo sapiens OX=9606 GN=USP11 PE=1 SV=3	1.50189e-07	1	K	ISDLCVALSK(1)HTGISPER	4	0.91414	1.23616e+07	1.13841e+07	-0.118846	15682000	1.19649e+07	0.3903
sp|Q9Y315|DEOC_HUMAN	137	>sp|Q9Y315|DEOC_HUMAN Deoxyribose-phosphate aldolase OS=Homo sapiens OX=9606 GN=DERA PE=1 SV=2	2.21805e-07	1	K	AAGCNIPVASVAAGFPAGQTHLK(1)TR	4	-0.13139	1	1	0	24964000	1.90566e+07	0.389562
sp|P55011|S12A2_HUMAN	943	>sp|P55011|S12A2_HUMAN Solute carrier family 12 member 2 OS=Homo sapiens OX=9606 GN=SLC12A2 PE=1 SV=1	1.4541e-95	1	K	EGLDISHLQGQEELLSSQEK(0.996)SPGTK(0.004)	3	-0.30795	9.52111e+07	6.57425e+07	-0.534305	17154000	1.30954e+07	0.389482
sp|Q12906|ILF3_HUMAN	100	>sp|Q12906|ILF3_HUMAN Interleukin enhancer-binding factor 3 OS=Homo sapiens OX=9606 GN=ILF3 PE=1 SV=3	1.46017e-10	1	K	VGLVAK(1)GLLLK	2	0.12764	6.1961e+07	3.8287e+07	-0.694505	26823000	2.04888e+07	0.388636
[truncated: 3,415 more rows]
