# Supplementary material for: PRAME induces genomic instability in uveal melanoma
Source: Oncogene. 2023 Nov 29;43(8):555–65. doi: 10.1038/s41388-023-02887-0 (PMC10873199; doi:10.1038/s41388-023-02887-0)
Supplement: Supplementary file 11 — Supplementary Table 5 [file 41388_2023_2887_MOESM11_ESM.xlsx]

## Sheet: Sheet1
Protein IDs	Majority protein IDs	Fasta headers	Peptides	Q-value	Score	Prame_1	EV_2
sp|Q14204|DYHC1_HUMAN	sp|Q14204|DYHC1_HUMAN	>sp|Q14204|DYHC1_HUMAN Cytoplasmic dynein 1 heavy chain 1 OS=Homo sapiens OX=9606 GN=DYNC1H1 PE=1 SV=5	200	0	323.31	6.25911e+09	6027000000
sp|Q15149|PLEC_HUMAN	sp|Q15149|PLEC_HUMAN	>sp|Q15149|PLEC_HUMAN Plectin OS=Homo sapiens OX=9606 GN=PLEC PE=1 SV=3	163	0	323.31	1.8552e+09	2677200000
sp|Q13813|SPTN1_HUMAN	sp|Q13813|SPTN1_HUMAN	>sp|Q13813|SPTN1_HUMAN Spectrin alpha chain, non-erythrocytic 1 OS=Homo sapiens OX=9606 GN=SPTAN1 PE=1 SV=3	150	0	323.31	1.26419e+10	9370600000
sp|Q01082|SPTB2_HUMAN	sp|Q01082|SPTB2_HUMAN	>sp|Q01082|SPTB2_HUMAN Spectrin beta chain, non-erythrocytic 1 OS=Homo sapiens OX=9606 GN=SPTBN1 PE=1 SV=2	127	0	323.31	9.31585e+09	7176700000
sp|P35579|MYH9_HUMAN;REV__sp|Q9UKV3|ACINU_HUMAN	sp|P35579|MYH9_HUMAN	>sp|P35579|MYH9_HUMAN Myosin-9 OS=Homo sapiens OX=9606 GN=MYH9 PE=1 SV=4	126	0	323.31	1.06748e+10	12751000000
sp|Q09666|AHNK_HUMAN	sp|Q09666|AHNK_HUMAN	>sp|Q09666|AHNK_HUMAN Neuroblast differentiation-associated protein AHNAK OS=Homo sapiens OX=9606 GN=AHNAK PE=1 SV=2	124	0	323.31	5.86284e+09	2915800000
sp|Q7Z6Z7|HUWE1_HUMAN	sp|Q7Z6Z7|HUWE1_HUMAN	>sp|Q7Z6Z7|HUWE1_HUMAN E3 ubiquitin-protein ligase HUWE1 OS=Homo sapiens OX=9606 GN=HUWE1 PE=1 SV=3	119	0	323.31	3.7461e+08	445980000
sp|P21333|FLNA_HUMAN	sp|P21333|FLNA_HUMAN	>sp|P21333|FLNA_HUMAN Filamin-A OS=Homo sapiens OX=9606 GN=FLNA PE=1 SV=4	105	0	323.31	4.93662e+09	6262300000
sp|O75369|FLNB_HUMAN	sp|O75369|FLNB_HUMAN	>sp|O75369|FLNB_HUMAN Filamin-B OS=Homo sapiens OX=9606 GN=FLNB PE=1 SV=2	101	0	323.31	2.16333e+09	2538200000
sp|P78527|PRKDC_HUMAN	sp|P78527|PRKDC_HUMAN	>sp|P78527|PRKDC_HUMAN DNA-dependent protein kinase catalytic subunit OS=Homo sapiens OX=9606 GN=PRKDC PE=1 SV=3	99	0	323.31	1.57427e+09	1484600000
sp|P49327|FAS_HUMAN	sp|P49327|FAS_HUMAN	>sp|P49327|FAS_HUMAN Fatty acid synthase OS=Homo sapiens OX=9606 GN=FASN PE=1 SV=3	98	0	323.31	6.44571e+09	5983700000
sp|Q9Y490|TLN1_HUMAN	sp|Q9Y490|TLN1_HUMAN	>sp|Q9Y490|TLN1_HUMAN Talin-1 OS=Homo sapiens OX=9606 GN=TLN1 PE=1 SV=3	90	0	323.31	2.02666e+09	2476900000
sp|Q00610|CLH1_HUMAN	sp|Q00610|CLH1_HUMAN	>sp|Q00610|CLH1_HUMAN Clathrin heavy chain 1 OS=Homo sapiens OX=9606 GN=CLTC PE=1 SV=5	82	0	323.31	6.46292e+09	7056100000
sp|Q92616|GCN1_HUMAN	sp|Q92616|GCN1_HUMAN	>sp|Q92616|GCN1_HUMAN eIF-2-alpha kinase activator GCN1 OS=Homo sapiens OX=9606 GN=GCN1 PE=1 SV=6	76	0	323.31	8.47913e+08	915530000
sp|Q14315|FLNC_HUMAN	sp|Q14315|FLNC_HUMAN	>sp|Q14315|FLNC_HUMAN Filamin-C OS=Homo sapiens OX=9606 GN=FLNC PE=1 SV=3	73	0	323.31	1.3202e+09	1232200000
sp|P35580|MYH10_HUMAN	sp|P35580|MYH10_HUMAN	>sp|P35580|MYH10_HUMAN Myosin-10 OS=Homo sapiens OX=9606 GN=MYH10 PE=1 SV=3	70	0	323.31	7.92565e+08	868780000
sp|Q9UPN3|MACF1_HUMAN	sp|Q9UPN3|MACF1_HUMAN	>sp|Q9UPN3|MACF1_HUMAN Microtubule-actin cross-linking factor 1, isoforms 1/2/3/5 OS=Homo sapiens OX=9606 GN=MACF1 PE=1 SV=4	67	0	323.31	2.8403e+08	402870000
sp|P46940|IQGA1_HUMAN;sp|Q13576|IQGA2_HUMAN	sp|P46940|IQGA1_HUMAN	>sp|P46940|IQGA1_HUMAN Ras GTPase-activating-like protein IQGAP1 OS=Homo sapiens OX=9606 GN=IQGAP1 PE=1 SV=1	66	0	323.31	2.1561e+09	1825200000
sp|P42704|LPPRC_HUMAN	sp|P42704|LPPRC_HUMAN	>sp|P42704|LPPRC_HUMAN Leucine-rich PPR motif-containing protein, mitochondrial OS=Homo sapiens OX=9606 GN=LRPPRC PE=1 SV=3	64	0	323.31	1.8855e+09	1872500000
sp|Q9NZM1|MYOF_HUMAN	sp|Q9NZM1|MYOF_HUMAN	>sp|Q9NZM1|MYOF_HUMAN Myoferlin OS=Homo sapiens OX=9606 GN=MYOF PE=1 SV=1	63	0	323.31	6.10671e+08	869000000
sp|O43707|ACTN4_HUMAN	sp|O43707|ACTN4_HUMAN	>sp|O43707|ACTN4_HUMAN Alpha-actinin-4 OS=Homo sapiens OX=9606 GN=ACTN4 PE=1 SV=2	60	0	323.31	9.73518e+09	11573000000
sp|Q14152|EIF3A_HUMAN	sp|Q14152|EIF3A_HUMAN	>sp|Q14152|EIF3A_HUMAN Eukaryotic translation initiation factor 3 subunit A OS=Homo sapiens OX=9606 GN=EIF3A PE=1 SV=1	60	0	323.31	8.03823e+08	655590000
sp|P27708|PYR1_HUMAN	sp|P27708|PYR1_HUMAN	>sp|P27708|PYR1_HUMAN CAD protein OS=Homo sapiens OX=9606 GN=CAD PE=1 SV=3	59	0	323.31	1.10386e+09	899750000
sp|Q14683|SMC1A_HUMAN	sp|Q14683|SMC1A_HUMAN	>sp|Q14683|SMC1A_HUMAN Structural maintenance of chromosomes protein 1A OS=Homo sapiens OX=9606 GN=SMC1A PE=1 SV=2	58	0	323.31	4.2437e+09	2601800000
sp|Q5T4S7|UBR4_HUMAN	sp|Q5T4S7|UBR4_HUMAN	>sp|Q5T4S7|UBR4_HUMAN E3 ubiquitin-protein ligase UBR4 OS=Homo sapiens OX=9606 GN=UBR4 PE=1 SV=1	58	0	323.31	3.35947e+08	288600000
sp|P12814|ACTN1_HUMAN;sp|P35609|ACTN2_HUMAN	sp|P12814|ACTN1_HUMAN	>sp|P12814|ACTN1_HUMAN Alpha-actinin-1 OS=Homo sapiens OX=9606 GN=ACTN1 PE=1 SV=2	56	0	323.31	2.62673e+09	3071600000
sp|P35908|K22E_HUMAN;CON__Q6NXH9	sp|P35908|K22E_HUMAN	>sp|P35908|K22E_HUMAN Keratin, type II cytoskeletal 2 epidermal OS=Homo sapiens OX=9606 GN=KRT2 PE=1 SV=2	56	0	323.31	5.78274e+09	4949200000
sp|P07814|SYEP_HUMAN	sp|P07814|SYEP_HUMAN	>sp|P07814|SYEP_HUMAN Bifunctional glutamate/proline--tRNA ligase OS=Homo sapiens OX=9606 GN=EPRS PE=1 SV=5	53	0	323.31	9.32939e+08	1056500000
sp|P46821|MAP1B_HUMAN;sp|P78559|MAP1A_HUMAN	sp|P46821|MAP1B_HUMAN	>sp|P46821|MAP1B_HUMAN Microtubule-associated protein 1B OS=Homo sapiens OX=9606 GN=MAP1B PE=1 SV=2	52	0	323.31	8.03937e+08	928240000
sp|P46939|UTRO_HUMAN	sp|P46939|UTRO_HUMAN	>sp|P46939|UTRO_HUMAN Utrophin OS=Homo sapiens OX=9606 GN=UTRN PE=1 SV=2	50	0	307.74	1.98787e+08	281870000
sp|P08238|HS90B_HUMAN;sp|Q58FF7|H90B3_HUMAN;sp|Q58FG1|HS904_HUMAN	sp|P08238|HS90B_HUMAN	>sp|P08238|HS90B_HUMAN Heat shock protein HSP 90-beta OS=Homo sapiens OX=9606 GN=HSP90AB1 PE=1 SV=4	48	0	323.31	1.5434e+10	13621000000
sp|Q03001|DYST_HUMAN	sp|Q03001|DYST_HUMAN	>sp|Q03001|DYST_HUMAN Dystonin OS=Homo sapiens OX=9606 GN=DST PE=1 SV=4	48	0	264.15	1.16137e+08	112330000
sp|P13639|EF2_HUMAN	sp|P13639|EF2_HUMAN	>sp|P13639|EF2_HUMAN Elongation factor 2 OS=Homo sapiens OX=9606 GN=EEF2 PE=1 SV=4	46	0	323.31	3.64121e+09	3259100000
sp|P07900|HS90A_HUMAN;sp|Q58FG0|HS905_HUMAN;sp|Q14568|HS902_HUMAN	sp|P07900|HS90A_HUMAN	>sp|P07900|HS90A_HUMAN Heat shock protein HSP 90-alpha OS=Homo sapiens OX=9606 GN=HSP90AA1 PE=1 SV=5	44	0	323.31	4.61885e+09	3341900000
sp|P08670|VIME_HUMAN;sp|P17661|DESM_HUMAN;sp|P41219|PERI_HUMAN;sp|P14136|GFAP_HUMAN;sp|P07196|NFL_HUMAN;sp|P07197|NFM_HUMAN	sp|P08670|VIME_HUMAN	>sp|P08670|VIME_HUMAN Vimentin OS=Homo sapiens OX=9606 GN=VIM PE=1 SV=4	44	0	323.31	8.28599e+09	6963000000
sp|P53621|COPA_HUMAN	sp|P53621|COPA_HUMAN	>sp|P53621|COPA_HUMAN Coatomer subunit alpha OS=Homo sapiens OX=9606 GN=COPA PE=1 SV=2	44	0	323.31	9.63614e+08	908100000
sp|P49792|RBP2_HUMAN;sp|P0DJD0|RGPD1_HUMAN;sp|Q99666|RGPD5_HUMAN;sp|O14715|RGPD8_HUMAN;sp|P0DJD1|RGPD2_HUMAN	sp|P49792|RBP2_HUMAN	>sp|P49792|RBP2_HUMAN E3 SUMO-protein ligase RanBP2 OS=Homo sapiens OX=9606 GN=RANBP2 PE=1 SV=2	43	0	200.63	1.86794e+08	218220000
sp|Q9UQE7|SMC3_HUMAN	sp|Q9UQE7|SMC3_HUMAN	>sp|Q9UQE7|SMC3_HUMAN Structural maintenance of chromosomes protein 3 OS=Homo sapiens OX=9606 GN=SMC3 PE=1 SV=2	43	0	323.31	1.88665e+09	1438500000
sp|O75643|U520_HUMAN	sp|O75643|U520_HUMAN	>sp|O75643|U520_HUMAN U5 small nuclear ribonucleoprotein 200 kDa helicase OS=Homo sapiens OX=9606 GN=SNRNP200 PE=1 SV=2	42	0	323.31	3.3146e+08	312220000
sp|Q02218|ODO1_HUMAN;sp|Q9ULD0|OGDHL_HUMAN	sp|Q02218|ODO1_HUMAN	>sp|Q02218|ODO1_HUMAN 2-oxoglutarate dehydrogenase, mitochondrial OS=Homo sapiens OX=9606 GN=OGDH PE=1 SV=3	42	0	323.31	3.24081e+08	211110000
sp|Q13085|ACACA_HUMAN;sp|O00763|ACACB_HUMAN	sp|Q13085|ACACA_HUMAN	>sp|Q13085|ACACA_HUMAN Acetyl-CoA carboxylase 1 OS=Homo sapiens OX=9606 GN=ACACA PE=1 SV=2	42	0	294.32	3.00728e+08	315180000
sp|Q14008|CKAP5_HUMAN	sp|Q14008|CKAP5_HUMAN	>sp|Q14008|CKAP5_HUMAN Cytoskeleton-associated protein 5 OS=Homo sapiens OX=9606 GN=CKAP5 PE=1 SV=3	41	0	264.6	3.83458e+08	451260000
sp|P14618|KPYM_HUMAN;sp|P30613|KPYR_HUMAN	sp|P14618|KPYM_HUMAN	>sp|P14618|KPYM_HUMAN Pyruvate kinase PKM OS=Homo sapiens OX=9606 GN=PKM PE=1 SV=4	40	0	323.31	2.1172e+10	19827000000
sp|P18206|VINC_HUMAN	sp|P18206|VINC_HUMAN	>sp|P18206|VINC_HUMAN Vinculin OS=Homo sapiens OX=9606 GN=VCL PE=1 SV=4	40	0	323.31	5.56883e+08	664350000
sp|Q04637|IF4G1_HUMAN;REV__sp|Q8NEG2|CG057_HUMAN	sp|Q04637|IF4G1_HUMAN	>sp|Q04637|IF4G1_HUMAN Eukaryotic translation initiation factor 4 gamma 1 OS=Homo sapiens OX=9606 GN=EIF4G1 PE=1 SV=4	40	0	323.31	9.40639e+08	1025900000
sp|Q63HN8|RN213_HUMAN	sp|Q63HN8|RN213_HUMAN	>sp|Q63HN8|RN213_HUMAN E3 ubiquitin-protein ligase RNF213 OS=Homo sapiens OX=9606 GN=RNF213 PE=1 SV=3	40	0	167.86	4.59165e+07	72996000
sp|Q6P2Q9|PRP8_HUMAN	sp|Q6P2Q9|PRP8_HUMAN	>sp|Q6P2Q9|PRP8_HUMAN Pre-mRNA-processing-splicing factor 8 OS=Homo sapiens OX=9606 GN=PRPF8 PE=1 SV=2	40	0	200.69	3.82815e+08	352730000
sp|Q86UP2|KTN1_HUMAN	sp|Q86UP2|KTN1_HUMAN	>sp|Q86UP2|KTN1_HUMAN Kinectin OS=Homo sapiens OX=9606 GN=KTN1 PE=1 SV=1	40	0	323.31	4.50879e+08	519740000
sp|P06737|PYGL_HUMAN	sp|P06737|PYGL_HUMAN	>sp|P06737|PYGL_HUMAN Glycogen phosphorylase, liver form OS=Homo sapiens OX=9606 GN=PYGL PE=1 SV=4	39	0	323.31	1.91798e+09	1808900000
sp|P41252|SYIC_HUMAN	sp|P41252|SYIC_HUMAN	>sp|P41252|SYIC_HUMAN Isoleucine--tRNA ligase, cytoplasmic OS=Homo sapiens OX=9606 GN=IARS PE=1 SV=2	39	0	323.31	1.03533e+09	1024100000
sp|P11586|C1TC_HUMAN	sp|P11586|C1TC_HUMAN	>sp|P11586|C1TC_HUMAN C-1-tetrahydrofolate synthase, cytoplasmic OS=Homo sapiens OX=9606 GN=MTHFD1 PE=1 SV=3	38	0	323.31	1.42313e+09	1249300000
sp|P14625|ENPL_HUMAN;sp|Q58FF3|ENPLL_HUMAN	sp|P14625|ENPL_HUMAN	>sp|P14625|ENPL_HUMAN Endoplasmin OS=Homo sapiens OX=9606 GN=HSP90B1 PE=1 SV=1	38	0	323.31	8.64772e+08	884020000
sp|Q9P2J5|SYLC_HUMAN	sp|Q9P2J5|SYLC_HUMAN	>sp|Q9P2J5|SYLC_HUMAN Leucine--tRNA ligase, cytoplasmic OS=Homo sapiens OX=9606 GN=LARS PE=1 SV=2	38	0	323.31	1.0608e+09	1014400000
sp|O00159|MYO1C_HUMAN	sp|O00159|MYO1C_HUMAN	>sp|O00159|MYO1C_HUMAN Unconventional myosin-Ic OS=Homo sapiens OX=9606 GN=MYO1C PE=1 SV=4	37	0	323.31	6.53143e+08	961050000
sp|P09874|PARP1_HUMAN	sp|P09874|PARP1_HUMAN	>sp|P09874|PARP1_HUMAN Poly [ADP-ribose] polymerase 1 OS=Homo sapiens OX=9606 GN=PARP1 PE=1 SV=4	37	0	323.31	1.25341e+09	1054200000
sp|A6NHR9|SMHD1_HUMAN	sp|A6NHR9|SMHD1_HUMAN	>sp|A6NHR9|SMHD1_HUMAN Structural maintenance of chromosomes flexible hinge domain-containing protein 1 OS=Homo sapiens OX=9606 GN=SMCHD1 PE=1 SV=2	36	0	240.42	4.18196e+07	71320000
sp|P49588|SYAC_HUMAN	sp|P49588|SYAC_HUMAN	>sp|P49588|SYAC_HUMAN Alanine--tRNA ligase, cytoplasmic OS=Homo sapiens OX=9606 GN=AARS PE=1 SV=2	36	0	323.31	2.50715e+09	2085800000
sp|Q93008|USP9X_HUMAN;sp|O00507|USP9Y_HUMAN	sp|Q93008|USP9X_HUMAN	>sp|Q93008|USP9X_HUMAN Probable ubiquitin carboxyl-terminal hydrolase FAF-X OS=Homo sapiens OX=9606 GN=USP9X PE=1 SV=3	36	0	198.76	1.84143e+08	263270000
sp|O75923|DYSF_HUMAN	sp|O75923|DYSF_HUMAN	>sp|O75923|DYSF_HUMAN Dysferlin OS=Homo sapiens OX=9606 GN=DYSF PE=1 SV=1	35	0	311.4	2.86337e+08	378490000
sp|P13010|XRCC5_HUMAN	sp|P13010|XRCC5_HUMAN	>sp|P13010|XRCC5_HUMAN X-ray repair cross-complementing protein 5 OS=Homo sapiens OX=9606 GN=XRCC5 PE=1 SV=3	35	0	323.31	1.04574e+09	1016800000
sp|P53396|ACLY_HUMAN	sp|P53396|ACLY_HUMAN	>sp|P53396|ACLY_HUMAN ATP-citrate synthase OS=Homo sapiens OX=9606 GN=ACLY PE=1 SV=3	35	0	323.31	1.8124e+09	1846800000
sp|P55060|XPO2_HUMAN	sp|P55060|XPO2_HUMAN	>sp|P55060|XPO2_HUMAN Exportin-2 OS=Homo sapiens OX=9606 GN=CSE1L PE=1 SV=3	35	0	323.31	5.98024e+08	1176900000
sp|P55884|EIF3B_HUMAN	sp|P55884|EIF3B_HUMAN	>sp|P55884|EIF3B_HUMAN Eukaryotic translation initiation factor 3 subunit B OS=Homo sapiens OX=9606 GN=EIF3B PE=1 SV=3	34	0	323.31	5.23224e+08	450390000
sp|Q00341|VIGLN_HUMAN	sp|Q00341|VIGLN_HUMAN	>sp|Q00341|VIGLN_HUMAN Vigilin OS=Homo sapiens OX=9606 GN=HDLBP PE=1 SV=2	34	0	274.65	3.77777e+08	436190000
sp|Q14203|DCTN1_HUMAN	sp|Q14203|DCTN1_HUMAN	>sp|Q14203|DCTN1_HUMAN Dynactin subunit 1 OS=Homo sapiens OX=9606 GN=DCTN1 PE=1 SV=3	34	0	323.31	2.19168e+08	300240000
sp|Q86VP6|CAND1_HUMAN;sp|O75155|CAND2_HUMAN	sp|Q86VP6|CAND1_HUMAN	>sp|Q86VP6|CAND1_HUMAN Cullin-associated NEDD8-dissociated protein 1 OS=Homo sapiens OX=9606 GN=CAND1 PE=1 SV=2	34	0	323.31	7.51274e+08	754100000
sp|P02545|LMNA_HUMAN	sp|P02545|LMNA_HUMAN	>sp|P02545|LMNA_HUMAN Prelamin-A/C OS=Homo sapiens OX=9606 GN=LMNA PE=1 SV=1	33	0	323.31	9.13235e+08	1128300000
sp|P05783|K1C18_HUMAN;CON__H-INV:HIT000015463;CON__Q92764;sp|Q92764|KRT35_HUMAN;CON__Q497I4	sp|P05783|K1C18_HUMAN	>sp|P05783|K1C18_HUMAN Keratin, type I cytoskeletal 18 OS=Homo sapiens OX=9606 GN=KRT18 PE=1 SV=2	33	0	323.31	3.90699e+09	5955200000
sp|Q08211|DHX9_HUMAN	sp|Q08211|DHX9_HUMAN	>sp|Q08211|DHX9_HUMAN ATP-dependent RNA helicase A OS=Homo sapiens OX=9606 GN=DHX9 PE=1 SV=4	33	0	323.31	7.20886e+08	693440000
sp|Q7KZF4|SND1_HUMAN	sp|Q7KZF4|SND1_HUMAN	>sp|Q7KZF4|SND1_HUMAN Staphylococcal nuclease domain-containing protein 1 OS=Homo sapiens OX=9606 GN=SND1 PE=1 SV=1	33	0	323.31	8.54007e+08	992850000
sp|Q8TEM1|PO210_HUMAN	sp|Q8TEM1|PO210_HUMAN	>sp|Q8TEM1|PO210_HUMAN Nuclear pore membrane glycoprotein 210 OS=Homo sapiens OX=9606 GN=NUP210 PE=1 SV=3	33	0	319.97	4.50007e+08	513910000
sp|Q8TEW0|PARD3_HUMAN	sp|Q8TEW0|PARD3_HUMAN	>sp|Q8TEW0|PARD3_HUMAN Partitioning defective 3 homolog OS=Homo sapiens OX=9606 GN=PARD3 PE=1 SV=2	33	0	301.16	3.78959e+08	471570000
sp|O00410|IPO5_HUMAN	sp|O00410|IPO5_HUMAN	>sp|O00410|IPO5_HUMAN Importin-5 OS=Homo sapiens OX=9606 GN=IPO5 PE=1 SV=4	32	0	323.31	6.96385e+08	876710000
sp|P10809|CH60_HUMAN	sp|P10809|CH60_HUMAN	>sp|P10809|CH60_HUMAN 60 kDa heat shock protein, mitochondrial OS=Homo sapiens OX=9606 GN=HSPD1 PE=1 SV=2	32	0	323.31	1.57106e+09	1288400000
sp|P16615|AT2A2_HUMAN;sp|O14983|AT2A1_HUMAN;sp|Q93084|AT2A3_HUMAN	sp|P16615|AT2A2_HUMAN	>sp|P16615|AT2A2_HUMAN Sarcoplasmic/endoplasmic reticulum calcium ATPase 2 OS=Homo sapiens OX=9606 GN=ATP2A2 PE=1 SV=1	32	0	323.31	1.25811e+09	1310900000
sp|P55072|TERA_HUMAN	sp|P55072|TERA_HUMAN	>sp|P55072|TERA_HUMAN Transitional endoplasmic reticulum ATPase OS=Homo sapiens OX=9606 GN=VCP PE=1 SV=4	32	0	323.31	2.67229e+09	1519400000
sp|Q9UQ35|SRRM2_HUMAN	sp|Q9UQ35|SRRM2_HUMAN	>sp|Q9UQ35|SRRM2_HUMAN Serine/arginine repetitive matrix protein 2 OS=Homo sapiens OX=9606 GN=SRRM2 PE=1 SV=2	32	0	222.89	1.59608e+08	116730000
sp|O14980|XPO1_HUMAN	sp|O14980|XPO1_HUMAN	>sp|O14980|XPO1_HUMAN Exportin-1 OS=Homo sapiens OX=9606 GN=XPO1 PE=1 SV=1	31	0	323.31	6.4651e+08	627820000
sp|P12956|XRCC6_HUMAN	sp|P12956|XRCC6_HUMAN	>sp|P12956|XRCC6_HUMAN X-ray repair cross-complementing protein 6 OS=Homo sapiens OX=9606 GN=XRCC6 PE=1 SV=2	31	0	323.31	1.88665e+09	1730000000
sp|P31939|PUR9_HUMAN	sp|P31939|PUR9_HUMAN	>sp|P31939|PUR9_HUMAN Bifunctional purine biosynthesis protein PURH OS=Homo sapiens OX=9606 GN=ATIC PE=1 SV=3	31	0	323.31	8.66642e+08	829940000
sp|P33176|KINH_HUMAN;sp|O60282|KIF5C_HUMAN;sp|Q12840|KIF5A_HUMAN	sp|P33176|KINH_HUMAN	>sp|P33176|KINH_HUMAN Kinesin-1 heavy chain OS=Homo sapiens OX=9606 GN=KIF5B PE=1 SV=1	31	0	323.31	3.92891e+08	347600000
sp|P34932|HSP74_HUMAN	sp|P34932|HSP74_HUMAN	>sp|P34932|HSP74_HUMAN Heat shock 70 kDa protein 4 OS=Homo sapiens OX=9606 GN=HSPA4 PE=1 SV=4	31	0	323.31	6.49746e+08	667010000
sp|P54136|SYRC_HUMAN	sp|P54136|SYRC_HUMAN	>sp|P54136|SYRC_HUMAN Arginine--tRNA ligase, cytoplasmic OS=Homo sapiens OX=9606 GN=RARS PE=1 SV=2	31	0	300.8	7.92875e+08	825530000
sp|Q14974|IMB1_HUMAN	sp|Q14974|IMB1_HUMAN	>sp|Q14974|IMB1_HUMAN Importin subunit beta-1 OS=Homo sapiens OX=9606 GN=KPNB1 PE=1 SV=2	31	0	323.31	1.90558e+09	1748300000
sp|P11021|BIP_HUMAN	sp|P11021|BIP_HUMAN	>sp|P11021|BIP_HUMAN Endoplasmic reticulum chaperone BiP OS=Homo sapiens OX=9606 GN=HSPA5 PE=1 SV=2	30	0	323.31	1.79117e+09	1927300000
sp|P19367|HXK1_HUMAN	sp|P19367|HXK1_HUMAN	>sp|P19367|HXK1_HUMAN Hexokinase-1 OS=Homo sapiens OX=9606 GN=HK1 PE=1 SV=3	30	0	323.31	9.56465e+08	944780000
sp|P22102|PUR2_HUMAN	sp|P22102|PUR2_HUMAN	>sp|P22102|PUR2_HUMAN Trifunctional purine biosynthetic protein adenosine-3 OS=Homo sapiens OX=9606 GN=GART PE=1 SV=1	30	0	213.34	4.64444e+08	365220000
sp|P26640|SYVC_HUMAN	sp|P26640|SYVC_HUMAN	>sp|P26640|SYVC_HUMAN Valine--tRNA ligase OS=Homo sapiens OX=9606 GN=VARS PE=1 SV=4	30	0	323.31	8.10077e+08	644860000
sp|P35606|COPB2_HUMAN	sp|P35606|COPB2_HUMAN	>sp|P35606|COPB2_HUMAN Coatomer subunit beta OS=Homo sapiens OX=9606 GN=COPB2 PE=1 SV=2	30	0	274.67	6.95949e+08	736500000
sp|P50990|TCPQ_HUMAN	sp|P50990|TCPQ_HUMAN	>sp|P50990|TCPQ_HUMAN T-complex protein 1 subunit theta OS=Homo sapiens OX=9606 GN=CCT8 PE=1 SV=4	30	0	306.03	1.95952e+09	2021500000
sp|P63010|AP2B1_HUMAN	sp|P63010|AP2B1_HUMAN	>sp|P63010|AP2B1_HUMAN AP-2 complex subunit beta OS=Homo sapiens OX=9606 GN=AP2B1 PE=1 SV=1	30	0	309.21	6.54153e+08	760060000
sp|Q13200|PSMD2_HUMAN	sp|Q13200|PSMD2_HUMAN	>sp|Q13200|PSMD2_HUMAN 26S proteasome non-ATPase regulatory subunit 2 OS=Homo sapiens OX=9606 GN=PSMD2 PE=1 SV=3	30	0	296.25	1.41177e+09	655040000
sp|Q15075|EEA1_HUMAN	sp|Q15075|EEA1_HUMAN	>sp|Q15075|EEA1_HUMAN Early endosome antigen 1 OS=Homo sapiens OX=9606 GN=EEA1 PE=1 SV=2	30	0	226.22	2.39538e+08	241590000
sp|Q9UHB6|LIMA1_HUMAN;sp|Q9BT23|LIMD2_HUMAN	sp|Q9UHB6|LIMA1_HUMAN	>sp|Q9UHB6|LIMA1_HUMAN LIM domain and actin-binding protein 1 OS=Homo sapiens OX=9606 GN=LIMA1 PE=1 SV=1	30	0	323.31	5.69805e+08	588040000
sp|O15020|SPTN2_HUMAN;sp|P11277|SPTB1_HUMAN	sp|O15020|SPTN2_HUMAN	>sp|O15020|SPTN2_HUMAN Spectrin beta chain, non-erythrocytic 2 OS=Homo sapiens OX=9606 GN=SPTBN2 PE=1 SV=3	29	0	185.11	7.50873e+07	111700000
sp|P55786|PSA_HUMAN;sp|A6NEC2|PSAL_HUMAN	sp|P55786|PSA_HUMAN	>sp|P55786|PSA_HUMAN Puromycin-sensitive aminopeptidase OS=Homo sapiens OX=9606 GN=NPEPPS PE=1 SV=2	29	0	323.31	5.41562e+08	775830000
sp|Q14573|ITPR3_HUMAN	sp|Q14573|ITPR3_HUMAN	>sp|Q14573|ITPR3_HUMAN Inositol 1,4,5-trisphosphate receptor type 3 OS=Homo sapiens OX=9606 GN=ITPR3 PE=1 SV=2	29	0	218.81	1.35554e+08	161950000
sp|P11413|G6PD_HUMAN	sp|P11413|G6PD_HUMAN	>sp|P11413|G6PD_HUMAN Glucose-6-phosphate 1-dehydrogenase OS=Homo sapiens OX=9606 GN=G6PD PE=1 SV=4	28	0	267.39	7.52846e+08	1050800000
sp|P17655|CAN2_HUMAN	sp|P17655|CAN2_HUMAN	>sp|P17655|CAN2_HUMAN Calpain-2 catalytic subunit OS=Homo sapiens OX=9606 GN=CAPN2 PE=1 SV=6	28	0	323.31	7.7659e+08	730410000
sp|P53618|COPB_HUMAN	sp|P53618|COPB_HUMAN	>sp|P53618|COPB_HUMAN Coatomer subunit beta OS=Homo sapiens OX=9606 GN=COPB1 PE=1 SV=3	28	0	323.31	7.04085e+08	658460000
sp|Q14697|GANAB_HUMAN	sp|Q14697|GANAB_HUMAN	>sp|Q14697|GANAB_HUMAN Neutral alpha-glucosidase AB OS=Homo sapiens OX=9606 GN=GANAB PE=1 SV=3	28	0	323.31	4.92032e+08	518980000
sp|Q99832|TCPH_HUMAN	sp|Q99832|TCPH_HUMAN	>sp|Q99832|TCPH_HUMAN T-complex protein 1 subunit eta OS=Homo sapiens OX=9606 GN=CCT7 PE=1 SV=2	28	0	323.31	1.19947e+09	1207400000
sp|P11142|HSP7C_HUMAN;sp|P54652|HSP72_HUMAN	sp|P11142|HSP7C_HUMAN	>sp|P11142|HSP7C_HUMAN Heat shock cognate 71 kDa protein OS=Homo sapiens OX=9606 GN=HSPA8 PE=1 SV=1	27	0	323.31	1.66011e+09	1405200000
sp|P20700|LMNB1_HUMAN	sp|P20700|LMNB1_HUMAN	>sp|P20700|LMNB1_HUMAN Lamin-B1 OS=Homo sapiens OX=9606 GN=LMNB1 PE=1 SV=2	27	0	323.31	2.77064e+08	306950000
sp|P22314|UBA1_HUMAN	sp|P22314|UBA1_HUMAN	>sp|P22314|UBA1_HUMAN Ubiquitin-like modifier-activating enzyme 1 OS=Homo sapiens OX=9606 GN=UBA1 PE=1 SV=3	27	0	323.31	4.34767e+08	593590000
sp|P78371|TCPB_HUMAN	sp|P78371|TCPB_HUMAN	>sp|P78371|TCPB_HUMAN T-complex protein 1 subunit beta OS=Homo sapiens OX=9606 GN=CCT2 PE=1 SV=4	27	0	323.31	9.11616e+08	1211200000
sp|Q13620|CUL4B_HUMAN	sp|Q13620|CUL4B_HUMAN	>sp|Q13620|CUL4B_HUMAN Cullin-4B OS=Homo sapiens OX=9606 GN=CUL4B PE=1 SV=4	27	0	291.55	4.10186e+08	340340000
sp|Q15746|MYLK_HUMAN	sp|Q15746|MYLK_HUMAN	>sp|Q15746|MYLK_HUMAN Myosin light chain kinase, smooth muscle OS=Homo sapiens OX=9606 GN=MYLK PE=1 SV=4	27	0	100.04	2.43738e+08	372510000
sp|Q71U36|TBA1A_HUMAN;sp|P0DPH8|TBA3D_HUMAN;sp|P0DPH7|TBA3C_HUMAN;sp|Q6PEY2|TBA3E_HUMAN	sp|Q71U36|TBA1A_HUMAN;sp|P0DPH8|TBA3D_HUMAN;sp|P0DPH7|TBA3C_HUMAN;sp|Q6PEY2|TBA3E_HUMAN	>sp|Q71U36|TBA1A_HUMAN Tubulin alpha-1A chain OS=Homo sapiens OX=9606 GN=TUBA1A PE=1 SV=1;>sp|P0DPH8|TBA3D_HUMAN Tubulin alpha-3D chain OS=Homo sapiens OX=9606 GN=TUBA3D PE=1 SV=1;>sp|P0DPH7|TBA3C_HUMAN Tubulin alpha-3C chain OS=Homo sapiens OX=9606 GN=TUB	27	0	323.31	1.75571e+10	18697000000
sp|Q9P2E9|RRBP1_HUMAN;sp|Q8N4C6|NIN_HUMAN	sp|Q9P2E9|RRBP1_HUMAN	>sp|Q9P2E9|RRBP1_HUMAN Ribosome-binding protein 1 OS=Homo sapiens OX=9606 GN=RRBP1 PE=1 SV=5	27	0	323.31	2.80633e+08	296090000
sp|A5YKK6|CNOT1_HUMAN	sp|A5YKK6|CNOT1_HUMAN	>sp|A5YKK6|CNOT1_HUMAN CCR4-NOT transcription complex subunit 1 OS=Homo sapiens OX=9606 GN=CNOT1 PE=1 SV=2	26	0	144.11	1.82147e+08	184430000
sp|O14974|MYPT1_HUMAN	sp|O14974|MYPT1_HUMAN	>sp|O14974|MYPT1_HUMAN Protein phosphatase 1 regulatory subunit 12A OS=Homo sapiens OX=9606 GN=PPP1R12A PE=1 SV=1	26	0	323.31	2.81253e+08	324770000
sp|O95782|AP2A1_HUMAN	sp|O95782|AP2A1_HUMAN	>sp|O95782|AP2A1_HUMAN AP-2 complex subunit alpha-1 OS=Homo sapiens OX=9606 GN=AP2A1 PE=1 SV=3	26	0	225.57	3.31805e+08	365040000
sp|P00338|LDHA_HUMAN;sp|Q6ZMR3|LDH6A_HUMAN;sp|P07864|LDHC_HUMAN	sp|P00338|LDHA_HUMAN	>sp|P00338|LDHA_HUMAN L-lactate dehydrogenase A chain OS=Homo sapiens OX=9606 GN=LDHA PE=1 SV=2	26	0	323.31	8.7751e+09	8181300000
sp|P00558|PGK1_HUMAN;sp|P07205|PGK2_HUMAN	sp|P00558|PGK1_HUMAN	>sp|P00558|PGK1_HUMAN Phosphoglycerate kinase 1 OS=Homo sapiens OX=9606 GN=PGK1 PE=1 SV=3	26	0	323.31	4.60531e+09	4911800000
sp|P04843|RPN1_HUMAN	sp|P04843|RPN1_HUMAN	>sp|P04843|RPN1_HUMAN Dolichyl-diphosphooligosaccharide--protein glycosyltransferase subunit 1 OS=Homo sapiens OX=9606 GN=RPN1 PE=1 SV=1	26	0	323.31	8.77671e+08	1050300000
sp|P05023|AT1A1_HUMAN;sp|P13637|AT1A3_HUMAN;sp|P50993|AT1A2_HUMAN;sp|Q13733|AT1A4_HUMAN;sp|P20648|ATP4A_HUMAN;sp|P54707|AT12A_HUMAN	sp|P05023|AT1A1_HUMAN	>sp|P05023|AT1A1_HUMAN Sodium/potassium-transporting ATPase subunit alpha-1 OS=Homo sapiens OX=9606 GN=ATP1A1 PE=1 SV=1	26	0	323.31	5.14777e+08	530640000
sp|P07437|TBB5_HUMAN	sp|P07437|TBB5_HUMAN	>sp|P07437|TBB5_HUMAN Tubulin beta chain OS=Homo sapiens OX=9606 GN=TUBB PE=1 SV=2	26	0	313.62	5.50468e+09	5701800000
sp|P11940|PABP1_HUMAN;sp|Q9H361|PABP3_HUMAN;sp|Q4VXU2|PAP1L_HUMAN;sp|Q5JQF8|PAP1M_HUMAN;sp|Q96DU9|PABP5_HUMAN	sp|P11940|PABP1_HUMAN;sp|Q9H361|PABP3_HUMAN	>sp|P11940|PABP1_HUMAN Polyadenylate-binding protein 1 OS=Homo sapiens OX=9606 GN=PABPC1 PE=1 SV=2;>sp|Q9H361|PABP3_HUMAN Polyadenylate-binding protein 3 OS=Homo sapiens OX=9606 GN=PABPC3 PE=1 SV=2	26	0	252.07	9.70821e+08	860020000
sp|P26639|SYTC_HUMAN;sp|A2RTX5|SYTC2_HUMAN	sp|P26639|SYTC_HUMAN	>sp|P26639|SYTC_HUMAN Threonine--tRNA ligase, cytoplasmic OS=Homo sapiens OX=9606 GN=TARS PE=1 SV=3	26	0	178.99	6.79802e+08	481690000
sp|P40939|ECHA_HUMAN	sp|P40939|ECHA_HUMAN	>sp|P40939|ECHA_HUMAN Trifunctional enzyme subunit alpha, mitochondrial OS=Homo sapiens OX=9606 GN=HADHA PE=1 SV=2	26	0	323.31	6.59111e+08	654220000
sp|P45974|UBP5_HUMAN	sp|P45974|UBP5_HUMAN	>sp|P45974|UBP5_HUMAN Ubiquitin carboxyl-terminal hydrolase 5 OS=Homo sapiens OX=9606 GN=USP5 PE=1 SV=2	26	0	234.88	2.65542e+08	288910000
sp|P49368|TCPG_HUMAN	sp|P49368|TCPG_HUMAN	>sp|P49368|TCPG_HUMAN T-complex protein 1 subunit gamma OS=Homo sapiens OX=9606 GN=CCT3 PE=1 SV=4	26	0	323.31	2.15358e+09	2371300000
sp|P63261|ACTG_HUMAN;sp|P60709|ACTB_HUMAN	sp|P63261|ACTG_HUMAN;sp|P60709|ACTB_HUMAN	>sp|P63261|ACTG_HUMAN Actin, cytoplasmic 2 OS=Homo sapiens OX=9606 GN=ACTG1 PE=1 SV=1;>sp|P60709|ACTB_HUMAN Actin, cytoplasmic 1 OS=Homo sapiens OX=9606 GN=ACTB PE=1 SV=1	26	0	323.31	1.06064e+11	68784000000
sp|P68363|TBA1B_HUMAN;sp|Q9H853|TBA4B_HUMAN	sp|P68363|TBA1B_HUMAN	>sp|P68363|TBA1B_HUMAN Tubulin alpha-1B chain OS=Homo sapiens OX=9606 GN=TUBA1B PE=1 SV=1	26	0	48.4	6.54933e+08	501160000
sp|P68371|TBB4B_HUMAN	sp|P68371|TBB4B_HUMAN	>sp|P68371|TBB4B_HUMAN Tubulin beta-4B chain OS=Homo sapiens OX=9606 GN=TUBB4B PE=1 SV=1	26	0	323.31	1.55672e+10	15532000000
sp|P78344|IF4G2_HUMAN	sp|P78344|IF4G2_HUMAN	>sp|P78344|IF4G2_HUMAN Eukaryotic translation initiation factor 4 gamma 2 OS=Homo sapiens OX=9606 GN=EIF4G2 PE=1 SV=1	26	0	323.31	2.73254e+08	281070000
sp|Q14980|NUMA1_HUMAN	sp|Q14980|NUMA1_HUMAN	>sp|Q14980|NUMA1_HUMAN Nuclear mitotic apparatus protein 1 OS=Homo sapiens OX=9606 GN=NUMA1 PE=1 SV=2	26	0	152.5	9.96263e+07	112040000
sp|Q27J81|INF2_HUMAN	sp|Q27J81|INF2_HUMAN	>sp|Q27J81|INF2_HUMAN Inverted formin-2 OS=Homo sapiens OX=9606 GN=INF2 PE=1 SV=2	26	0	323.31	1.74951e+08	210410000
sp|Q5VYK3|ECM29_HUMAN	sp|Q5VYK3|ECM29_HUMAN	>sp|Q5VYK3|ECM29_HUMAN Proteasome adapter and scaffold protein ECM29 OS=Homo sapiens OX=9606 GN=ECPAS PE=1 SV=2	26	0	152.5	1.25065e+08	151750000
sp|Q8WUM4|PDC6I_HUMAN	sp|Q8WUM4|PDC6I_HUMAN	>sp|Q8WUM4|PDC6I_HUMAN Programmed cell death 6-interacting protein OS=Homo sapiens OX=9606 GN=PDCD6IP PE=1 SV=1	26	0	323.31	6.11405e+08	683570000
sp|Q92900|RENT1_HUMAN	sp|Q92900|RENT1_HUMAN	>sp|Q92900|RENT1_HUMAN Regulator of nonsense transcripts 1 OS=Homo sapiens OX=9606 GN=UPF1 PE=1 SV=2	26	0	154.99	5.37592e+08	479530000
sp|Q9BQE3|TBA1C_HUMAN	sp|Q9BQE3|TBA1C_HUMAN	>sp|Q9BQE3|TBA1C_HUMAN Tubulin alpha-1C chain OS=Homo sapiens OX=9606 GN=TUBA1C PE=1 SV=1	26	0	78.221	1.70292e+08	156270000
sp|O00330|ODPX_HUMAN	sp|O00330|ODPX_HUMAN	>sp|O00330|ODPX_HUMAN Pyruvate dehydrogenase protein X component, mitochondrial OS=Homo sapiens OX=9606 GN=PDHX PE=1 SV=3	25	0	290.47	2.36416e+07	24661000
sp|O75083|WDR1_HUMAN	sp|O75083|WDR1_HUMAN	>sp|O75083|WDR1_HUMAN WD repeat-containing protein 1 OS=Homo sapiens OX=9606 GN=WDR1 PE=1 SV=4	25	0	323.31	1.78589e+09	1983000000
sp|O94973|AP2A2_HUMAN	sp|O94973|AP2A2_HUMAN	>sp|O94973|AP2A2_HUMAN AP-2 complex subunit alpha-2 OS=Homo sapiens OX=9606 GN=AP2A2 PE=1 SV=2	25	0	180.27	1.13488e+08	88450000
sp|P06733|ENOA_HUMAN	sp|P06733|ENOA_HUMAN	>sp|P06733|ENOA_HUMAN Alpha-enolase OS=Homo sapiens OX=9606 GN=ENO1 PE=1 SV=2	25	0	323.31	1.29323e+09	1378500000
sp|P08133|ANXA6_HUMAN	sp|P08133|ANXA6_HUMAN	>sp|P08133|ANXA6_HUMAN Annexin A6 OS=Homo sapiens OX=9606 GN=ANXA6 PE=1 SV=3	25	0	208.17	3.38036e+08	411080000
sp|P09960|LKHA4_HUMAN	sp|P09960|LKHA4_HUMAN	>sp|P09960|LKHA4_HUMAN Leukotriene A-4 hydrolase OS=Homo sapiens OX=9606 GN=LTA4H PE=1 SV=2	25	0	323.31	5.80604e+08	681080000
sp|P11216|PYGB_HUMAN	sp|P11216|PYGB_HUMAN	>sp|P11216|PYGB_HUMAN Glycogen phosphorylase, brain form OS=Homo sapiens OX=9606 GN=PYGB PE=1 SV=5	25	0	203.4	3.05502e+08	298860000
sp|P14868|SYDC_HUMAN	sp|P14868|SYDC_HUMAN	>sp|P14868|SYDC_HUMAN Aspartate--tRNA ligase, cytoplasmic OS=Homo sapiens OX=9606 GN=DARS PE=1 SV=2	25	0	236.28	9.96493e+08	938140000
sp|P36776|LONM_HUMAN	sp|P36776|LONM_HUMAN	>sp|P36776|LONM_HUMAN Lon protease homolog, mitochondrial OS=Homo sapiens OX=9606 GN=LONP1 PE=1 SV=2	25	0	314.66	2.74723e+08	303800000
sp|P38646|GRP75_HUMAN	sp|P38646|GRP75_HUMAN	>sp|P38646|GRP75_HUMAN Stress-70 protein, mitochondrial OS=Homo sapiens OX=9606 GN=HSPA9 PE=1 SV=2	25	0	268.4	5.36605e+08	542390000
sp|P60842|IF4A1_HUMAN	sp|P60842|IF4A1_HUMAN	>sp|P60842|IF4A1_HUMAN Eukaryotic initiation factor 4A-I OS=Homo sapiens OX=9606 GN=EIF4A1 PE=1 SV=1	25	0	323.31	4.07546e+09	3744400000
sp|Q01813|PFKAP_HUMAN	sp|Q01813|PFKAP_HUMAN	>sp|Q01813|PFKAP_HUMAN ATP-dependent 6-phosphofructokinase, platelet type OS=Homo sapiens OX=9606 GN=PFKP PE=1 SV=2	25	0	323.31	9.84053e+08	987840000
sp|Q10567|AP1B1_HUMAN	sp|Q10567|AP1B1_HUMAN	>sp|Q10567|AP1B1_HUMAN AP-1 complex subunit beta-1 OS=Homo sapiens OX=9606 GN=AP1B1 PE=1 SV=2	25	0	175.02	1.72036e+08	162700000
sp|Q13617|CUL2_HUMAN	sp|Q13617|CUL2_HUMAN	>sp|Q13617|CUL2_HUMAN Cullin-2 OS=Homo sapiens OX=9606 GN=CUL2 PE=1 SV=2	25	0	240.82	4.56135e+08	590270000
sp|Q15029|U5S1_HUMAN	sp|Q15029|U5S1_HUMAN	>sp|Q15029|U5S1_HUMAN 116 kDa U5 small nuclear ribonucleoprotein component OS=Homo sapiens OX=9606 GN=EFTUD2 PE=1 SV=1	25	0	263.31	2.49166e+08	219860000
sp|Q15046|SYK_HUMAN	sp|Q15046|SYK_HUMAN	>sp|Q15046|SYK_HUMAN Lysine--tRNA ligase OS=Homo sapiens OX=9606 GN=KARS PE=1 SV=3	25	0	323.31	1.27785e+09	1140100000
sp|Q6P2E9|EDC4_HUMAN	sp|Q6P2E9|EDC4_HUMAN	>sp|Q6P2E9|EDC4_HUMAN Enhancer of mRNA-decapping protein 4 OS=Homo sapiens OX=9606 GN=EDC4 PE=1 SV=1	25	0	314.35	4.98918e+08	380350000
sp|Q96QK1|VPS35_HUMAN	sp|Q96QK1|VPS35_HUMAN	>sp|Q96QK1|VPS35_HUMAN Vacuolar protein sorting-associated protein 35 OS=Homo sapiens OX=9606 GN=VPS35 PE=1 SV=2	25	0	323.31	5.50537e+08	628190000
sp|Q9C0C2|TB182_HUMAN	sp|Q9C0C2|TB182_HUMAN	>sp|Q9C0C2|TB182_HUMAN 182 kDa tankyrase-1-binding protein OS=Homo sapiens OX=9606 GN=TNKS1BP1 PE=1 SV=4	25	0	251.83	8.38113e+07	115140000
sp|Q9Y678|COPG1_HUMAN	sp|Q9Y678|COPG1_HUMAN	>sp|Q9Y678|COPG1_HUMAN Coatomer subunit gamma-1 OS=Homo sapiens OX=9606 GN=COPG1 PE=1 SV=1	25	0	323.31	7.67168e+08	437880000
sp|P02786|TFR1_HUMAN	sp|P02786|TFR1_HUMAN	>sp|P02786|TFR1_HUMAN Transferrin receptor protein 1 OS=Homo sapiens OX=9606 GN=TFRC PE=1 SV=2	24	0	199.79	5.30718e+08	627270000
sp|P04350|TBB4A_HUMAN	sp|P04350|TBB4A_HUMAN	>sp|P04350|TBB4A_HUMAN Tubulin beta-4A chain OS=Homo sapiens OX=9606 GN=TUBB4A PE=1 SV=2	24	0	145.57	1.02766e+08	110410000
sp|P07384|CAN1_HUMAN	sp|P07384|CAN1_HUMAN	>sp|P07384|CAN1_HUMAN Calpain-1 catalytic subunit OS=Homo sapiens OX=9606 GN=CAPN1 PE=1 SV=1	24	0	190.78	4.49158e+08	606240000
sp|P17987|TCPA_HUMAN	sp|P17987|TCPA_HUMAN	>sp|P17987|TCPA_HUMAN T-complex protein 1 subunit alpha OS=Homo sapiens OX=9606 GN=TCP1 PE=1 SV=1	24	0	323.31	9.96665e+08	1097000000
sp|P30101|PDIA3_HUMAN	sp|P30101|PDIA3_HUMAN	>sp|P30101|PDIA3_HUMAN Protein disulfide-isomerase A3 OS=Homo sapiens OX=9606 GN=PDIA3 PE=1 SV=4	24	0	323.31	5.9426e+08	828470000
sp|P48735|IDHP_HUMAN	sp|P48735|IDHP_HUMAN	>sp|P48735|IDHP_HUMAN Isocitrate dehydrogenase [NADP], mitochondrial OS=Homo sapiens OX=9606 GN=IDH2 PE=1 SV=2	24	0	323.31	8.09802e+08	1014100000
sp|P54886|P5CS_HUMAN	sp|P54886|P5CS_HUMAN	>sp|P54886|P5CS_HUMAN Delta-1-pyrroline-5-carboxylate synthase OS=Homo sapiens OX=9606 GN=ALDH18A1 PE=1 SV=2	24	0	206.93	3.52565e+08	306630000
sp|P62736|ACTA_HUMAN;sp|P63267|ACTH_HUMAN	sp|P62736|ACTA_HUMAN;sp|P63267|ACTH_HUMAN	>sp|P62736|ACTA_HUMAN Actin, aortic smooth muscle OS=Homo sapiens OX=9606 GN=ACTA2 PE=1 SV=1;>sp|P63267|ACTH_HUMAN Actin, gamma-enteric smooth muscle OS=Homo sapiens OX=9606 GN=ACTG2 PE=1 SV=1	24	0	6.7945	0	69623000
sp|P68032|ACTC_HUMAN;sp|P68133|ACTS_HUMAN	sp|P68032|ACTC_HUMAN;sp|P68133|ACTS_HUMAN	>sp|P68032|ACTC_HUMAN Actin, alpha cardiac muscle 1 OS=Homo sapiens OX=9606 GN=ACTC1 PE=1 SV=1;>sp|P68133|ACTS_HUMAN Actin, alpha skeletal muscle OS=Homo sapiens OX=9606 GN=ACTA1 PE=1 SV=1	24	0	323.31	1.26339e+10	13324000000
sp|P68366|TBA4A_HUMAN	sp|P68366|TBA4A_HUMAN	>sp|P68366|TBA4A_HUMAN Tubulin alpha-4A chain OS=Homo sapiens OX=9606 GN=TUBA4A PE=1 SV=1	24	0	36.798	1.21611e+08	266450000
sp|Q06210|GFPT1_HUMAN;sp|O94808|GFPT2_HUMAN	sp|Q06210|GFPT1_HUMAN	>sp|Q06210|GFPT1_HUMAN Glutamine--fructose-6-phosphate aminotransferase [isomerizing] 1 OS=Homo sapiens OX=9606 GN=GFPT1 PE=1 SV=3	24	0	161.39	4.29855e+08	369590000
sp|Q08378|GOGA3_HUMAN	sp|Q08378|GOGA3_HUMAN	>sp|Q08378|GOGA3_HUMAN Golgin subfamily A member 3 OS=Homo sapiens OX=9606 GN=GOLGA3 PE=1 SV=2	24	0	112.3	3.36774e+07	21369000
sp|Q9P0K7|RAI14_HUMAN	sp|Q9P0K7|RAI14_HUMAN	>sp|Q9P0K7|RAI14_HUMAN Ankycorbin OS=Homo sapiens OX=9606 GN=RAI14 PE=1 SV=2	24	0	184.01	1.46043e+08	213110000
sp|Q9UHD8|SEPT9_HUMAN	sp|Q9UHD8|SEPT9_HUMAN	>sp|Q9UHD8|SEPT9_HUMAN Septin-9 OS=Homo sapiens OX=9606 GN=SEPTIN9 PE=1 SV=2	24	0	294.89	5.63172e+08	532810000
sp|Q9UPQ0|LIMC1_HUMAN	sp|Q9UPQ0|LIMC1_HUMAN	>sp|Q9UPQ0|LIMC1_HUMAN LIM and calponin homology domains-containing protein 1 OS=Homo sapiens OX=9606 GN=LIMCH1 PE=1 SV=4	24	0	219.86	1.72679e+08	306500000
sp|O00571|DDX3X_HUMAN;sp|O15523|DDX3Y_HUMAN;sp|Q9NQI0|DDX4_HUMAN	sp|O00571|DDX3X_HUMAN;sp|O15523|DDX3Y_HUMAN	>sp|O00571|DDX3X_HUMAN ATP-dependent RNA helicase DDX3X OS=Homo sapiens OX=9606 GN=DDX3X PE=1 SV=3;>sp|O15523|DDX3Y_HUMAN ATP-dependent RNA helicase DDX3Y OS=Homo sapiens OX=9606 GN=DDX3Y PE=1 SV=2	23	0	322.83	6.83773e+08	567790000
sp|O60271|JIP4_HUMAN;sp|Q9UPT6|JIP3_HUMAN	sp|O60271|JIP4_HUMAN	>sp|O60271|JIP4_HUMAN C-Jun-amino-terminal kinase-interacting protein 4 OS=Homo sapiens OX=9606 GN=SPAG9 PE=1 SV=4	23	0	169.46	9.89584e+07	86169000
sp|P26038|MOES_HUMAN	sp|P26038|MOES_HUMAN	>sp|P26038|MOES_HUMAN Moesin OS=Homo sapiens OX=9606 GN=MSN PE=1 SV=3	23	0	126.31	7.60214e+07	218490000
sp|P40227|TCPZ_HUMAN	sp|P40227|TCPZ_HUMAN	>sp|P40227|TCPZ_HUMAN T-complex protein 1 subunit zeta OS=Homo sapiens OX=9606 GN=CCT6A PE=1 SV=3	23	0	323.31	1.86703e+09	1799100000
sp|P47897|SYQ_HUMAN	sp|P47897|SYQ_HUMAN	>sp|P47897|SYQ_HUMAN Glutamine--tRNA ligase OS=Homo sapiens OX=9606 GN=QARS PE=1 SV=1	23	0	214.79	3.19984e+08	504370000
sp|P48643|TCPE_HUMAN	sp|P48643|TCPE_HUMAN	>sp|P48643|TCPE_HUMAN T-complex protein 1 subunit epsilon OS=Homo sapiens OX=9606 GN=CCT5 PE=1 SV=1	23	0	323.31	7.71793e+08	814420000
sp|P52272|HNRPM_HUMAN	sp|P52272|HNRPM_HUMAN	>sp|P52272|HNRPM_HUMAN Heterogeneous nuclear ribonucleoprotein M OS=Homo sapiens OX=9606 GN=HNRNPM PE=1 SV=3	23	0	125.52	4.59153e+08	609550000
sp|Q02790|FKBP4_HUMAN	sp|Q02790|FKBP4_HUMAN	>sp|Q02790|FKBP4_HUMAN Peptidyl-prolyl cis-trans isomerase FKBP4 OS=Homo sapiens OX=9606 GN=FKBP4 PE=1 SV=3	23	0	323.31	9.2121e+08	919720000
sp|Q04446|GLGB_HUMAN	sp|Q04446|GLGB_HUMAN	>sp|Q04446|GLGB_HUMAN 1,4-alpha-glucan-branching enzyme OS=Homo sapiens OX=9606 GN=GBE1 PE=1 SV=3	23	0	233.51	6.07366e+08	621260000
sp|Q16531|DDB1_HUMAN	sp|Q16531|DDB1_HUMAN	>sp|Q16531|DDB1_HUMAN DNA damage-binding protein 1 OS=Homo sapiens OX=9606 GN=DDB1 PE=1 SV=1	23	0	196.87	2.6661e+08	279150000
sp|Q16881|TRXR1_HUMAN	sp|Q16881|TRXR1_HUMAN	>sp|Q16881|TRXR1_HUMAN Thioredoxin reductase 1, cytoplasmic OS=Homo sapiens OX=9606 GN=TXNRD1 PE=1 SV=3	23	0	323.31	1.88217e+09	1883100000
sp|Q6WCQ1|MPRIP_HUMAN	sp|Q6WCQ1|MPRIP_HUMAN	>sp|Q6WCQ1|MPRIP_HUMAN Myosin phosphatase Rho-interacting protein OS=Homo sapiens OX=9606 GN=MPRIP PE=1 SV=3	23	0	145.44	1.06147e+08	228300000
sp|Q92841|DDX17_HUMAN	sp|Q92841|DDX17_HUMAN	>sp|Q92841|DDX17_HUMAN Probable ATP-dependent RNA helicase DDX17 OS=Homo sapiens OX=9606 GN=DDX17 PE=1 SV=2	23	0	212.95	6.00985e+08	657310000
sp|O43795|MYO1B_HUMAN;sp|Q9UBC5|MYO1A_HUMAN	sp|O43795|MYO1B_HUMAN	>sp|O43795|MYO1B_HUMAN Unconventional myosin-Ib OS=Homo sapiens OX=9606 GN=MYO1B PE=1 SV=3	22	0	140.11	2.66093e+08	217560000
sp|O60313|OPA1_HUMAN	sp|O60313|OPA1_HUMAN	>sp|O60313|OPA1_HUMAN Dynamin-like 120 kDa protein, mitochondrial OS=Homo sapiens OX=9606 GN=OPA1 PE=1 SV=3	22	0	118.76	1.9726e+08	164930000
sp|O60763|USO1_HUMAN	sp|O60763|USO1_HUMAN	>sp|O60763|USO1_HUMAN General vesicular transport factor p115 OS=Homo sapiens OX=9606 GN=USO1 PE=1 SV=2	22	0	191.45	3.04079e+08	299460000
sp|P04075|ALDOA_HUMAN	sp|P04075|ALDOA_HUMAN	>sp|P04075|ALDOA_HUMAN Fructose-bisphosphate aldolase A OS=Homo sapiens OX=9606 GN=ALDOA PE=1 SV=2	22	0	303.32	7.98601e+08	763620000
sp|P06576|ATPB_HUMAN	sp|P06576|ATPB_HUMAN	>sp|P06576|ATPB_HUMAN ATP synthase subunit beta, mitochondrial OS=Homo sapiens OX=9606 GN=ATP5F1B PE=1 SV=3	22	0	314.69	1.06135e+09	662820000
sp|P15924|DESP_HUMAN	sp|P15924|DESP_HUMAN	>sp|P15924|DESP_HUMAN Desmoplakin OS=Homo sapiens OX=9606 GN=DSP PE=1 SV=3	22	0	71.939	1.02257e+08	91700000
sp|P26641|EF1G_HUMAN	sp|P26641|EF1G_HUMAN	>sp|P26641|EF1G_HUMAN Elongation factor 1-gamma OS=Homo sapiens OX=9606 GN=EEF1G PE=1 SV=3	22	0	323.31	2.17079e+09	2056700000
sp|P34897|GLYM_HUMAN	sp|P34897|GLYM_HUMAN	>sp|P34897|GLYM_HUMAN Serine hydroxymethyltransferase, mitochondrial OS=Homo sapiens OX=9606 GN=SHMT2 PE=1 SV=3	22	0	323.31	1.31079e+09	1341700000
sp|P36871|PGM1_HUMAN	sp|P36871|PGM1_HUMAN	>sp|P36871|PGM1_HUMAN Phosphoglucomutase-1 OS=Homo sapiens OX=9606 GN=PGM1 PE=1 SV=3	22	0	194.63	4.5322e+08	432310000
sp|P50991|TCPD_HUMAN	sp|P50991|TCPD_HUMAN	>sp|P50991|TCPD_HUMAN T-complex protein 1 subunit delta OS=Homo sapiens OX=9606 GN=CCT4 PE=1 SV=4	22	0	323.31	1.82261e+09	1748700000
sp|Q03252|LMNB2_HUMAN	sp|Q03252|LMNB2_HUMAN	>sp|Q03252|LMNB2_HUMAN Lamin-B2 OS=Homo sapiens OX=9606 GN=LMNB2 PE=1 SV=4	22	0	93.195	1.3319e+08	205420000
sp|Q13885|TBB2A_HUMAN;sp|Q9BVA1|TBB2B_HUMAN;sp|A6NNZ2|TBB8B_HUMAN;sp|Q9H4B7|TBB1_HUMAN	sp|Q13885|TBB2A_HUMAN;sp|Q9BVA1|TBB2B_HUMAN	>sp|Q13885|TBB2A_HUMAN Tubulin beta-2A chain OS=Homo sapiens OX=9606 GN=TUBB2A PE=1 SV=1;>sp|Q9BVA1|TBB2B_HUMAN Tubulin beta-2B chain OS=Homo sapiens OX=9606 GN=TUBB2B PE=1 SV=1	22	0	20.342	4.33769e+07	48239000
sp|Q14240|IF4A2_HUMAN	sp|Q14240|IF4A2_HUMAN	>sp|Q14240|IF4A2_HUMAN Eukaryotic initiation factor 4A-II OS=Homo sapiens OX=9606 GN=EIF4A2 PE=1 SV=2	22	0	216.7	3.02105e+08	284220000
sp|Q6PGP7|TTC37_HUMAN	sp|Q6PGP7|TTC37_HUMAN	>sp|Q6PGP7|TTC37_HUMAN Tetratricopeptide repeat protein 37 OS=Homo sapiens OX=9606 GN=TTC37 PE=1 SV=1	22	0	142.55	2.20694e+08	184460000
sp|Q8N1F7|NUP93_HUMAN	sp|Q8N1F7|NUP93_HUMAN	>sp|Q8N1F7|NUP93_HUMAN Nuclear pore complex protein Nup93 OS=Homo sapiens OX=9606 GN=NUP93 PE=1 SV=2	22	0	323.31	3.13891e+08	307120000
sp|Q9Y230|RUVB2_HUMAN	sp|Q9Y230|RUVB2_HUMAN	>sp|Q9Y230|RUVB2_HUMAN RuvB-like 2 OS=Homo sapiens OX=9606 GN=RUVBL2 PE=1 SV=3	22	0	153.76	5.52992e+08	472840000
sp|Q9Y262|EIF3L_HUMAN	sp|Q9Y262|EIF3L_HUMAN	>sp|Q9Y262|EIF3L_HUMAN Eukaryotic translation initiation factor 3 subunit L OS=Homo sapiens OX=9606 GN=EIF3L PE=1 SV=1	22	0	323.31	3.73095e+08	463310000
sp|O15067|PUR4_HUMAN	sp|O15067|PUR4_HUMAN	>sp|O15067|PUR4_HUMAN Phosphoribosylformylglycinamidine synthase OS=Homo sapiens OX=9606 GN=PFAS PE=1 SV=4	21	0	238.82	2.89435e+08	227480000
sp|P07355|ANXA2_HUMAN;sp|A6NMY6|AXA2L_HUMAN	sp|P07355|ANXA2_HUMAN;sp|A6NMY6|AXA2L_HUMAN	>sp|P07355|ANXA2_HUMAN Annexin A2 OS=Homo sapiens OX=9606 GN=ANXA2 PE=1 SV=2;>sp|A6NMY6|AXA2L_HUMAN Putative annexin A2-like protein OS=Homo sapiens OX=9606 GN=ANXA2P2 PE=5 SV=2	21	0	323.31	7.7371e+08	844460000
sp|P17844|DDX5_HUMAN	sp|P17844|DDX5_HUMAN	>sp|P17844|DDX5_HUMAN Probable ATP-dependent RNA helicase DDX5 OS=Homo sapiens OX=9606 GN=DDX5 PE=1 SV=1	21	0	136.4	2.77638e+08	301250000
sp|P30153|2AAA_HUMAN	sp|P30153|2AAA_HUMAN	>sp|P30153|2AAA_HUMAN Serine/threonine-protein phosphatase 2A 65 kDa regulatory subunit A alpha isoform OS=Homo sapiens OX=9606 GN=PPP2R1A PE=1 SV=4	21	0	247.3	1.06022e+09	1118700000
sp|P42224|STAT1_HUMAN	sp|P42224|STAT1_HUMAN	>sp|P42224|STAT1_HUMAN Signal transducer and activator of transcription 1-alpha/beta OS=Homo sapiens OX=9606 GN=STAT1 PE=1 SV=2	21	0	169.32	2.7509e+08	311270000
sp|P49411|EFTU_HUMAN	sp|P49411|EFTU_HUMAN	>sp|P49411|EFTU_HUMAN Elongation factor Tu, mitochondrial OS=Homo sapiens OX=9606 GN=TUFM PE=1 SV=2	21	0	323.31	1.87024e+09	1795400000
sp|P56192|SYMC_HUMAN	sp|P56192|SYMC_HUMAN	>sp|P56192|SYMC_HUMAN Methionine--tRNA ligase, cytoplasmic OS=Homo sapiens OX=9606 GN=MARS PE=1 SV=2	21	0	248.95	4.22281e+08	399560000
sp|P61978|HNRPK_HUMAN	sp|P61978|HNRPK_HUMAN	>sp|P61978|HNRPK_HUMAN Heterogeneous nuclear ribonucleoprotein K OS=Homo sapiens OX=9606 GN=HNRNPK PE=1 SV=1	21	0	323.31	1.99602e+09	1879400000
sp|Q01970|PLCB3_HUMAN	sp|Q01970|PLCB3_HUMAN	>sp|Q01970|PLCB3_HUMAN 1-phosphatidylinositol 4,5-bisphosphate phosphodiesterase beta-3 OS=Homo sapiens OX=9606 GN=PLCB3 PE=1 SV=2	21	0	323.31	624166	8603800
sp|Q0ZGT2|NEXN_HUMAN	sp|Q0ZGT2|NEXN_HUMAN	>sp|Q0ZGT2|NEXN_HUMAN Nexilin OS=Homo sapiens OX=9606 GN=NEXN PE=1 SV=1	21	0	278.38	2.90572e+08	163770000
sp|Q12906|ILF3_HUMAN;sp|Q96SI9|STRBP_HUMAN	sp|Q12906|ILF3_HUMAN	>sp|Q12906|ILF3_HUMAN Interleukin enhancer-binding factor 3 OS=Homo sapiens OX=9606 GN=ILF3 PE=1 SV=3	21	0	270.65	3.01497e+08	284480000
sp|Q15393|SF3B3_HUMAN	sp|Q15393|SF3B3_HUMAN	>sp|Q15393|SF3B3_HUMAN Splicing factor 3B subunit 3 OS=Homo sapiens OX=9606 GN=SF3B3 PE=1 SV=4	21	0	247.18	2.88724e+08	306250000
sp|Q8TEX9|IPO4_HUMAN	sp|Q8TEX9|IPO4_HUMAN	>sp|Q8TEX9|IPO4_HUMAN Importin-4 OS=Homo sapiens OX=9606 GN=IPO4 PE=1 SV=2	21	0	239.92	2.12512e+08	181710000
sp|Q92614|MY18A_HUMAN	sp|Q92614|MY18A_HUMAN	>sp|Q92614|MY18A_HUMAN Unconventional myosin-XVIIIa OS=Homo sapiens OX=9606 GN=MYO18A PE=1 SV=3	21	0	235.25	4.23876e+07	67272000
sp|Q92621|NU205_HUMAN	sp|Q92621|NU205_HUMAN	>sp|Q92621|NU205_HUMAN Nuclear pore complex protein Nup205 OS=Homo sapiens OX=9606 GN=NUP205 PE=1 SV=3	21	0	125.38	2.74436e+08	128430000
sp|Q96N67|DOCK7_HUMAN	sp|Q96N67|DOCK7_HUMAN	>sp|Q96N67|DOCK7_HUMAN Dedicator of cytokinesis protein 7 OS=Homo sapiens OX=9606 GN=DOCK7 PE=1 SV=4	21	0	144.9	8.70154e+07	101600000
sp|Q99613|EIF3C_HUMAN;sp|B5ME19|EIFCL_HUMAN	sp|Q99613|EIF3C_HUMAN;sp|B5ME19|EIFCL_HUMAN	>sp|Q99613|EIF3C_HUMAN Eukaryotic translation initiation factor 3 subunit C OS=Homo sapiens OX=9606 GN=EIF3C PE=1 SV=1;>sp|B5ME19|EIFCL_HUMAN Eukaryotic translation initiation factor 3 subunit C-like protein OS=Homo sapiens OX=9606 GN=EIF3CL PE=1 SV=1	21	0	323.31	4.02061e+08	361350000
sp|Q9NZB2|F120A_HUMAN;sp|Q5T035|CI129_HUMAN	sp|Q9NZB2|F120A_HUMAN	>sp|Q9NZB2|F120A_HUMAN Constitutive coactivator of PPAR-gamma-like protein 1 OS=Homo sapiens OX=9606 GN=FAM120A PE=1 SV=2	21	0	163.32	1.85704e+08	241490000
sp|O14617|AP3D1_HUMAN	sp|O14617|AP3D1_HUMAN	>sp|O14617|AP3D1_HUMAN AP-3 complex subunit delta-1 OS=Homo sapiens OX=9606 GN=AP3D1 PE=1 SV=1	20	0	216.89	1.52848e+08	159330000
sp|O43242|PSMD3_HUMAN	sp|O43242|PSMD3_HUMAN	>sp|O43242|PSMD3_HUMAN 26S proteasome non-ATPase regulatory subunit 3 OS=Homo sapiens OX=9606 GN=PSMD3 PE=1 SV=2	20	0	314.03	3.79499e+08	363120000
sp|O60506|HNRPQ_HUMAN	sp|O60506|HNRPQ_HUMAN	>sp|O60506|HNRPQ_HUMAN Heterogeneous nuclear ribonucleoprotein Q OS=Homo sapiens OX=9606 GN=SYNCRIP PE=1 SV=2	20	0	323.31	7.67318e+08	671140000
sp|O60716|CTND1_HUMAN	sp|O60716|CTND1_HUMAN	>sp|O60716|CTND1_HUMAN Catenin delta-1 OS=Homo sapiens OX=9606 GN=CTNND1 PE=1 SV=1	20	0	310.05	2.69066e+08	368320000
sp|P02751|FINC_HUMAN	sp|P02751|FINC_HUMAN	>sp|P02751|FINC_HUMAN Fibronectin OS=Homo sapiens OX=9606 GN=FN1 PE=1 SV=4	20	0	104.68	4.11333e+07	95363000
sp|P04083|ANXA1_HUMAN	sp|P04083|ANXA1_HUMAN	>sp|P04083|ANXA1_HUMAN Annexin A1 OS=Homo sapiens OX=9606 GN=ANXA1 PE=1 SV=2	20	0	323.31	1.27464e+09	1332500000
sp|P08195|4F2_HUMAN	sp|P08195|4F2_HUMAN	>sp|P08195|4F2_HUMAN 4F2 cell-surface antigen heavy chain OS=Homo sapiens OX=9606 GN=SLC3A2 PE=1 SV=3	20	0	323.31	5.27217e+08	616690000
sp|P20020|AT2B1_HUMAN;sp|Q01814|AT2B2_HUMAN	sp|P20020|AT2B1_HUMAN	>sp|P20020|AT2B1_HUMAN Plasma membrane calcium-transporting ATPase 1 OS=Homo sapiens OX=9606 GN=ATP2B1 PE=1 SV=4	20	0	108.95	1.41315e+08	222030000
sp|P29401|TKT_HUMAN	sp|P29401|TKT_HUMAN	>sp|P29401|TKT_HUMAN Transketolase OS=Homo sapiens OX=9606 GN=TKT PE=1 SV=3	20	0	270.59	3.96414e+08	478830000
sp|P30837|AL1B1_HUMAN;sp|P00352|AL1A1_HUMAN;sp|P47895|AL1A3_HUMAN;sp|O94788|AL1A2_HUMAN	sp|P30837|AL1B1_HUMAN	>sp|P30837|AL1B1_HUMAN Aldehyde dehydrogenase X, mitochondrial OS=Homo sapiens OX=9606 GN=ALDH1B1 PE=1 SV=3	20	0	323.31	5.01029e+08	940520000
sp|P43243|MATR3_HUMAN	sp|P43243|MATR3_HUMAN	>sp|P43243|MATR3_HUMAN Matrin-3 OS=Homo sapiens OX=9606 GN=MATR3 PE=1 SV=2	20	0	323.31	5.42044e+08	544080000
sp|P50570|DYN2_HUMAN	sp|P50570|DYN2_HUMAN	>sp|P50570|DYN2_HUMAN Dynamin-2 OS=Homo sapiens OX=9606 GN=DNM2 PE=1 SV=2	20	0	133.22	1.46112e+08	171720000
sp|P53675|CLH2_HUMAN	sp|P53675|CLH2_HUMAN	>sp|P53675|CLH2_HUMAN Clathrin heavy chain 2 OS=Homo sapiens OX=9606 GN=CLTCL1 PE=1 SV=2	20	0.00038926	5.842	0	0
sp|P55196|AFAD_HUMAN	sp|P55196|AFAD_HUMAN	>sp|P55196|AFAD_HUMAN Afadin OS=Homo sapiens OX=9606 GN=AFDN PE=1 SV=3	20	0	166.68	6.89912e+07	107420000
sp|P68104|EF1A1_HUMAN;sp|Q5VTE0|EF1A3_HUMAN	sp|P68104|EF1A1_HUMAN;sp|Q5VTE0|EF1A3_HUMAN	>sp|P68104|EF1A1_HUMAN Elongation factor 1-alpha 1 OS=Homo sapiens OX=9606 GN=EEF1A1 PE=1 SV=1;>sp|Q5VTE0|EF1A3_HUMAN Putative elongation factor 1-alpha-like 3 OS=Homo sapiens OX=9606 GN=EEF1A1P5 PE=5 SV=1	20	0	323.31	1.50404e+10	16885000000
sp|Q00839|HNRPU_HUMAN	sp|Q00839|HNRPU_HUMAN	>sp|Q00839|HNRPU_HUMAN Heterogeneous nuclear ribonucleoprotein U OS=Homo sapiens OX=9606 GN=HNRNPU PE=1 SV=6	20	0	260.6	9.40433e+08	944000000
sp|Q14157|UBP2L_HUMAN	sp|Q14157|UBP2L_HUMAN	>sp|Q14157|UBP2L_HUMAN Ubiquitin-associated protein 2-like OS=Homo sapiens OX=9606 GN=UBAP2L PE=1 SV=2	20	0	323.31	4.02451e+08	385050000
sp|Q16643|DREB_HUMAN	sp|Q16643|DREB_HUMAN	>sp|Q16643|DREB_HUMAN Drebrin OS=Homo sapiens OX=9606 GN=DBN1 PE=1 SV=4	20	0	323.31	1.05924e+09	879740000
sp|Q6BDS2|URFB1_HUMAN	sp|Q6BDS2|URFB1_HUMAN	>sp|Q6BDS2|URFB1_HUMAN UHRF1-binding protein 1 OS=Homo sapiens OX=9606 GN=UHRF1BP1 PE=1 SV=1	20	0	177.06	1.00117e+07	7626300
sp|Q92499|DDX1_HUMAN	sp|Q92499|DDX1_HUMAN	>sp|Q92499|DDX1_HUMAN ATP-dependent RNA helicase DDX1 OS=Homo sapiens OX=9606 GN=DDX1 PE=1 SV=2	20	0	245.75	3.7663e+08	274920000
sp|Q99460|PSMD1_HUMAN	sp|Q99460|PSMD1_HUMAN	>sp|Q99460|PSMD1_HUMAN 26S proteasome non-ATPase regulatory subunit 1 OS=Homo sapiens OX=9606 GN=PSMD1 PE=1 SV=2	20	0	151.12	2.28165e+08	262470000
sp|Q9BUF5|TBB6_HUMAN	sp|Q9BUF5|TBB6_HUMAN	>sp|Q9BUF5|TBB6_HUMAN Tubulin beta-6 chain OS=Homo sapiens OX=9606 GN=TUBB6 PE=1 SV=1	20	0	287.46	6.21332e+08	399310000
sp|Q9BXJ9|NAA15_HUMAN;sp|Q6N069|NAA16_HUMAN	sp|Q9BXJ9|NAA15_HUMAN	>sp|Q9BXJ9|NAA15_HUMAN N-alpha-acetyltransferase 15, NatA auxiliary subunit OS=Homo sapiens OX=9606 GN=NAA15 PE=1 SV=1	20	0	135.95	1.30482e+09	806260000
sp|Q9ULT8|HECD1_HUMAN	sp|Q9ULT8|HECD1_HUMAN	>sp|Q9ULT8|HECD1_HUMAN E3 ubiquitin-protein ligase HECTD1 OS=Homo sapiens OX=9606 GN=HECTD1 PE=1 SV=3	20	0	163.9	9.22668e+07	99754000
sp|O15031|PLXB2_HUMAN;sp|O60486|PLXC1_HUMAN	sp|O15031|PLXB2_HUMAN	>sp|O15031|PLXB2_HUMAN Plexin-B2 OS=Homo sapiens OX=9606 GN=PLXNB2 PE=1 SV=3	19	0	141.89	1.10454e+08	150350000
sp|O75165|DJC13_HUMAN	sp|O75165|DJC13_HUMAN	>sp|O75165|DJC13_HUMAN DnaJ homolog subfamily C member 13 OS=Homo sapiens OX=9606 GN=DNAJC13 PE=1 SV=5	19	0	177.56	8.70578e+07	78126000
sp|O75533|SF3B1_HUMAN	sp|O75533|SF3B1_HUMAN	>sp|O75533|SF3B1_HUMAN Splicing factor 3B subunit 1 OS=Homo sapiens OX=9606 GN=SF3B1 PE=1 SV=3	19	0	164.04	1.64898e+08	184590000
sp|O75534|CSDE1_HUMAN	sp|O75534|CSDE1_HUMAN	>sp|O75534|CSDE1_HUMAN Cold shock domain-containing protein E1 OS=Homo sapiens OX=9606 GN=CSDE1 PE=1 SV=2	19	0	248.46	1.92945e+08	209900000
sp|O95373|IPO7_HUMAN	sp|O95373|IPO7_HUMAN	>sp|O95373|IPO7_HUMAN Importin-7 OS=Homo sapiens OX=9606 GN=IPO7 PE=1 SV=1	19	0	281.69	4.76804e+08	496550000
sp|O95573|ACSL3_HUMAN	sp|O95573|ACSL3_HUMAN	>sp|O95573|ACSL3_HUMAN Long-chain-fatty-acid--CoA ligase 3 OS=Homo sapiens OX=9606 GN=ACSL3 PE=1 SV=3	19	0	179.38	2.65921e+08	349100000
sp|P00533|EGFR_HUMAN	sp|P00533|EGFR_HUMAN	>sp|P00533|EGFR_HUMAN Epidermal growth factor receptor OS=Homo sapiens OX=9606 GN=EGFR PE=1 SV=2	19	0	156.33	1.05305e+08	151940000
sp|P04844|RPN2_HUMAN	sp|P04844|RPN2_HUMAN	>sp|P04844|RPN2_HUMAN Dolichyl-diphosphooligosaccharide--protein glycosyltransferase subunit 2 OS=Homo sapiens OX=9606 GN=RPN2 PE=1 SV=3	19	0	323.31	6.10866e+08	649730000
sp|P05198|IF2A_HUMAN	sp|P05198|IF2A_HUMAN	>sp|P05198|IF2A_HUMAN Eukaryotic translation initiation factor 2 subunit 1 OS=Homo sapiens OX=9606 GN=EIF2S1 PE=1 SV=3	19	0	323.31	6.50882e+08	551670000
sp|P07195|LDHB_HUMAN	sp|P07195|LDHB_HUMAN	>sp|P07195|LDHB_HUMAN L-lactate dehydrogenase B chain OS=Homo sapiens OX=9606 GN=LDHB PE=1 SV=2	19	0	323.31	4.07558e+09	3941800000
sp|P07237|PDIA1_HUMAN	sp|P07237|PDIA1_HUMAN	>sp|P07237|PDIA1_HUMAN Protein disulfide-isomerase OS=Homo sapiens OX=9606 GN=P4HB PE=1 SV=3	19	0	277.73	3.53219e+08	397000000
sp|P11274|BCR_HUMAN	sp|P11274|BCR_HUMAN	>sp|P11274|BCR_HUMAN Breakpoint cluster region protein OS=Homo sapiens OX=9606 GN=BCR PE=1 SV=2	19	0	78.959	1.30987e+07	18372000
sp|P15121|ALDR_HUMAN;sp|C9JRZ8|AK1BF_HUMAN	sp|P15121|ALDR_HUMAN	>sp|P15121|ALDR_HUMAN Aldo-keto reductase family 1 member B1 OS=Homo sapiens OX=9606 GN=AKR1B1 PE=1 SV=3	19	0	244.73	1.97295e+09	2126300000
sp|P23921|RIR1_HUMAN	sp|P23921|RIR1_HUMAN	>sp|P23921|RIR1_HUMAN Ribonucleoside-diphosphate reductase large subunit OS=Homo sapiens OX=9606 GN=RRM1 PE=1 SV=1	19	0	244.41	2.49683e+08	240150000
sp|P25705|ATPA_HUMAN	sp|P25705|ATPA_HUMAN	>sp|P25705|ATPA_HUMAN ATP synthase subunit alpha, mitochondrial OS=Homo sapiens OX=9606 GN=ATP5F1A PE=1 SV=1	19	0	323.31	8.97753e+08	808080000
sp|P29144|TPP2_HUMAN	sp|P29144|TPP2_HUMAN	>sp|P29144|TPP2_HUMAN Tripeptidyl-peptidase 2 OS=Homo sapiens OX=9606 GN=TPP2 PE=1 SV=4	19	0	111.83	1.63165e+08	154100000
sp|P35221|CTNA1_HUMAN;sp|Q9UI47|CTNA3_HUMAN	sp|P35221|CTNA1_HUMAN	>sp|P35221|CTNA1_HUMAN Catenin alpha-1 OS=Homo sapiens OX=9606 GN=CTNNA1 PE=1 SV=1	19	0	279.54	9.34603e+07	150820000
sp|P35998|PRS7_HUMAN	sp|P35998|PRS7_HUMAN	>sp|P35998|PRS7_HUMAN 26S proteasome regulatory subunit 7 OS=Homo sapiens OX=9606 GN=PSMC2 PE=1 SV=3	19	0	277.09	4.03346e+08	386520000
sp|P48444|COPD_HUMAN	sp|P48444|COPD_HUMAN	>sp|P48444|COPD_HUMAN Coatomer subunit delta OS=Homo sapiens OX=9606 GN=ARCN1 PE=1 SV=1	19	0	109.11	5.03302e+08	313490000
sp|P78332|RBM6_HUMAN;sp|P98175|RBM10_HUMAN	sp|P78332|RBM6_HUMAN	>sp|P78332|RBM6_HUMAN RNA-binding protein 6 OS=Homo sapiens OX=9606 GN=RBM6 PE=1 SV=5	19	0	161.62	7.45353e+07	73291000
sp|Q07065|CKAP4_HUMAN	sp|Q07065|CKAP4_HUMAN	>sp|Q07065|CKAP4_HUMAN Cytoskeleton-associated protein 4 OS=Homo sapiens OX=9606 GN=CKAP4 PE=1 SV=2	19	0	239.17	2.88253e+08	284220000
sp|Q13509|TBB3_HUMAN	sp|Q13509|TBB3_HUMAN	>sp|Q13509|TBB3_HUMAN Tubulin beta-3 chain OS=Homo sapiens OX=9606 GN=TUBB3 PE=1 SV=2	19	0	25.752	2.40169e+07	42559000
sp|Q14764|MVP_HUMAN	sp|Q14764|MVP_HUMAN	>sp|Q14764|MVP_HUMAN Major vault protein OS=Homo sapiens OX=9606 GN=MVP PE=1 SV=4	19	0	127.1	1.09484e+08	145110000
sp|Q14839|CHD4_HUMAN;sp|Q12873|CHD3_HUMAN;sp|Q8TDI0|CHD5_HUMAN	sp|Q14839|CHD4_HUMAN	>sp|Q14839|CHD4_HUMAN Chromodomain-helicase-DNA-binding protein 4 OS=Homo sapiens OX=9606 GN=CHD4 PE=1 SV=2	19	0	101.27	7.40647e+07	48811000
sp|Q16891|MIC60_HUMAN	sp|Q16891|MIC60_HUMAN	>sp|Q16891|MIC60_HUMAN MICOS complex subunit MIC60 OS=Homo sapiens OX=9606 GN=IMMT PE=1 SV=1	19	0	170.42	3.79717e+08	392840000
sp|Q7L2E3|DHX30_HUMAN	sp|Q7L2E3|DHX30_HUMAN	>sp|Q7L2E3|DHX30_HUMAN ATP-dependent RNA helicase DHX30 OS=Homo sapiens OX=9606 GN=DHX30 PE=1 SV=1	19	0	84.948	1.36839e+08	153640000
sp|Q7L576|CYFP1_HUMAN;sp|Q96F07|CYFP2_HUMAN	sp|Q7L576|CYFP1_HUMAN	>sp|Q7L576|CYFP1_HUMAN Cytoplasmic FMR1-interacting protein 1 OS=Homo sapiens OX=9606 GN=CYFIP1 PE=1 SV=1	19	0	75.727	1.10551e+08	97187000
sp|Q92620|PRP16_HUMAN	sp|Q92620|PRP16_HUMAN	>sp|Q92620|PRP16_HUMAN Pre-mRNA-splicing factor ATP-dependent RNA helicase PRP16 OS=Homo sapiens OX=9606 GN=DHX38 PE=1 SV=2	19	0	95.361	9.75515e+07	83923000
sp|Q96AC1|FERM2_HUMAN	sp|Q96AC1|FERM2_HUMAN	>sp|Q96AC1|FERM2_HUMAN Fermitin family homolog 2 OS=Homo sapiens OX=9606 GN=FERMT2 PE=1 SV=1	19	0	113.85	1.67159e+08	199430000
sp|Q96HC4|PDLI5_HUMAN	sp|Q96HC4|PDLI5_HUMAN	>sp|Q96HC4|PDLI5_HUMAN PDZ and LIM domain protein 5 OS=Homo sapiens OX=9606 GN=PDLIM5 PE=1 SV=5	19	0	244.9	3.8386e+08	511030000
sp|Q9H2M9|RBGPR_HUMAN	sp|Q9H2M9|RBGPR_HUMAN	>sp|Q9H2M9|RBGPR_HUMAN Rab3 GTPase-activating protein non-catalytic subunit OS=Homo sapiens OX=9606 GN=RAB3GAP2 PE=1 SV=1	19	0	78.818	1.39387e+08	164210000
sp|Q9H4M9|EHD1_HUMAN	sp|Q9H4M9|EHD1_HUMAN	>sp|Q9H4M9|EHD1_HUMAN EH domain-containing protein 1 OS=Homo sapiens OX=9606 GN=EHD1 PE=1 SV=2	19	0	175.19	1.74366e+08	223950000
sp|Q9Y613|FHOD1_HUMAN	sp|Q9Y613|FHOD1_HUMAN	>sp|Q9Y613|FHOD1_HUMAN FH1/FH2 domain-containing protein 1 OS=Homo sapiens OX=9606 GN=FHOD1 PE=1 SV=3	19	0	155.33	1.59413e+08	156410000
sp|A6NKT7|RGPD3_HUMAN;sp|Q7Z3J3|RGPD4_HUMAN	sp|A6NKT7|RGPD3_HUMAN;sp|Q7Z3J3|RGPD4_HUMAN	>sp|A6NKT7|RGPD3_HUMAN RanBP2-like and GRIP domain-containing protein 3 OS=Homo sapiens OX=9606 GN=RGPD3 PE=3 SV=2;>sp|Q7Z3J3|RGPD4_HUMAN RanBP2-like and GRIP domain-containing protein 4 OS=Homo sapiens OX=9606 GN=RGPD4 PE=2 SV=3	18	0.00072833	4.5191	1.06634e+07	12845000
sp|O00232|PSD12_HUMAN	sp|O00232|PSD12_HUMAN	>sp|O00232|PSD12_HUMAN 26S proteasome non-ATPase regulatory subunit 12 OS=Homo sapiens OX=9606 GN=PSMD12 PE=1 SV=3	18	0	268.02	2.92626e+08	352290000
sp|O43592|XPOT_HUMAN	sp|O43592|XPOT_HUMAN	>sp|O43592|XPOT_HUMAN Exportin-T OS=Homo sapiens OX=9606 GN=XPOT PE=1 SV=2	18	0	111.53	1.62913e+08	168690000
sp|O94874|UFL1_HUMAN	sp|O94874|UFL1_HUMAN	>sp|O94874|UFL1_HUMAN E3 UFM1-protein ligase 1 OS=Homo sapiens OX=9606 GN=UFL1 PE=1 SV=2	18	0	159.1	1.25145e+08	162910000
sp|O95202|LETM1_HUMAN	sp|O95202|LETM1_HUMAN	>sp|O95202|LETM1_HUMAN Mitochondrial proton/calcium exchanger protein OS=Homo sapiens OX=9606 GN=LETM1 PE=1 SV=1	18	0	101.91	1.57829e+08	140260000
sp|P10515|ODP2_HUMAN	sp|P10515|ODP2_HUMAN	>sp|P10515|ODP2_HUMAN Dihydrolipoyllysine-residue acetyltransferase component of pyruvate dehydrogenase complex, mitochondrial OS=Homo sapiens OX=9606 GN=DLAT PE=1 SV=3	18	0	309.53	1.14208e+08	68611000
sp|P13797|PLST_HUMAN;sp|P13796|PLSL_HUMAN	sp|P13797|PLST_HUMAN	>sp|P13797|PLST_HUMAN Plastin-3 OS=Homo sapiens OX=9606 GN=PLS3 PE=1 SV=4	18	0	258.9	3.54584e+08	395370000
sp|P19338|NUCL_HUMAN	sp|P19338|NUCL_HUMAN	>sp|P19338|NUCL_HUMAN Nucleolin OS=Homo sapiens OX=9606 GN=NCL PE=1 SV=3	18	0	323.31	9.03491e+08	796880000
sp|P21589|5NTD_HUMAN	sp|P21589|5NTD_HUMAN	>sp|P21589|5NTD_HUMAN 5-nucleotidase OS=Homo sapiens OX=9606 GN=NT5E PE=1 SV=1	18	0	323.31	4.6115e+08	320970000
sp|P38606|VATA_HUMAN	sp|P38606|VATA_HUMAN	>sp|P38606|VATA_HUMAN V-type proton ATPase catalytic subunit A OS=Homo sapiens OX=9606 GN=ATP6V1A PE=1 SV=2	18	0	188.2	2.63316e+08	287000000
sp|P43490|NAMPT_HUMAN	sp|P43490|NAMPT_HUMAN	>sp|P43490|NAMPT_HUMAN Nicotinamide phosphoribosyltransferase OS=Homo sapiens OX=9606 GN=NAMPT PE=1 SV=1	18	0	323.31	6.123e+08	486050000
sp|P50851|LRBA_HUMAN;sp|Q8NFP9|NBEA_HUMAN	sp|P50851|LRBA_HUMAN	>sp|P50851|LRBA_HUMAN Lipopolysaccharide-responsive and beige-like anchor protein OS=Homo sapiens OX=9606 GN=LRBA PE=1 SV=4	18	0	55.396	3.21981e+07	49726000
sp|P52209|6PGD_HUMAN	sp|P52209|6PGD_HUMAN	>sp|P52209|6PGD_HUMAN 6-phosphogluconate dehydrogenase, decarboxylating OS=Homo sapiens OX=9606 GN=PGD PE=1 SV=3	18	0	323.31	5.84861e+08	667520000
sp|P60228|EIF3E_HUMAN	sp|P60228|EIF3E_HUMAN	>sp|P60228|EIF3E_HUMAN Eukaryotic translation initiation factor 3 subunit E OS=Homo sapiens OX=9606 GN=EIF3E PE=1 SV=1	18	0	184.17	3.22245e+08	316730000
sp|P61158|ARP3_HUMAN;sp|Q9P1U1|ARP3B_HUMAN;sp|Q9C0K3|ARP3C_HUMAN	sp|P61158|ARP3_HUMAN	>sp|P61158|ARP3_HUMAN Actin-related protein 3 OS=Homo sapiens OX=9606 GN=ACTR3 PE=1 SV=3	18	0	220.66	4.12251e+08	462960000
sp|Q07157|ZO1_HUMAN	sp|Q07157|ZO1_HUMAN	>sp|Q07157|ZO1_HUMAN Tight junction protein ZO-1 OS=Homo sapiens OX=9606 GN=TJP1 PE=1 SV=3	18	0	121.1	1.06971e+08	87446000
sp|Q12797|ASPH_HUMAN	sp|Q12797|ASPH_HUMAN	>sp|Q12797|ASPH_HUMAN Aspartyl/asparaginyl beta-hydroxylase OS=Homo sapiens OX=9606 GN=ASPH PE=1 SV=3	18	0	236.05	3.54917e+08	337680000
sp|Q15124|PGM5_HUMAN	sp|Q15124|PGM5_HUMAN	>sp|Q15124|PGM5_HUMAN Phosphoglucomutase-like protein 5 OS=Homo sapiens OX=9606 GN=PGM5 PE=1 SV=2	18	0	81.706	1.26247e+08	173870000
sp|Q16555|DPYL2_HUMAN	sp|Q16555|DPYL2_HUMAN	>sp|Q16555|DPYL2_HUMAN Dihydropyrimidinase-related protein 2 OS=Homo sapiens OX=9606 GN=DPYSL2 PE=1 SV=1	18	0	323.31	6.8134e+08	740860000
sp|Q68EM7|RHG17_HUMAN	sp|Q68EM7|RHG17_HUMAN	>sp|Q68EM7|RHG17_HUMAN Rho GTPase-activating protein 17 OS=Homo sapiens OX=9606 GN=ARHGAP17 PE=1 SV=1	18	0	249.74	2.37415e+07	23549000
sp|Q8N163|CCAR2_HUMAN	sp|Q8N163|CCAR2_HUMAN	>sp|Q8N163|CCAR2_HUMAN Cell cycle and apoptosis regulator protein 2 OS=Homo sapiens OX=9606 GN=CCAR2 PE=1 SV=2	18	0	141.5	1.3171e+08	136660000
sp|Q96T76|MMS19_HUMAN	sp|Q96T76|MMS19_HUMAN	>sp|Q96T76|MMS19_HUMAN MMS19 nucleotide excision repair protein homolog OS=Homo sapiens OX=9606 GN=MMS19 PE=1 SV=2	18	0	117.65	1.40317e+08	149730000
sp|Q9H223|EHD4_HUMAN	sp|Q9H223|EHD4_HUMAN	>sp|Q9H223|EHD4_HUMAN EH domain-containing protein 4 OS=Homo sapiens OX=9606 GN=EHD4 PE=1 SV=1	18	0	123.33	1.56199e+08	144120000
sp|Q9NUU7|DD19A_HUMAN;sp|Q9UHL0|DDX25_HUMAN	sp|Q9NUU7|DD19A_HUMAN	>sp|Q9NUU7|DD19A_HUMAN ATP-dependent RNA helicase DDX19A OS=Homo sapiens OX=9606 GN=DDX19A PE=1 SV=1	18	0	180.75	4.16015e+08	453840000
sp|Q9UDY2|ZO2_HUMAN	sp|Q9UDY2|ZO2_HUMAN	>sp|Q9UDY2|ZO2_HUMAN Tight junction protein ZO-2 OS=Homo sapiens OX=9606 GN=TJP2 PE=1 SV=2	18	0	139.58	4.80028e+07	32232000
sp|Q9UHB9|SRP68_HUMAN	sp|Q9UHB9|SRP68_HUMAN	>sp|Q9UHB9|SRP68_HUMAN Signal recognition particle subunit SRP68 OS=Homo sapiens OX=9606 GN=SRP68 PE=1 SV=2	18	0	228.45	2.20132e+08	236170000
sp|Q9UIA9|XPO7_HUMAN;sp|Q9H2T7|RBP17_HUMAN	sp|Q9UIA9|XPO7_HUMAN	>sp|Q9UIA9|XPO7_HUMAN Exportin-7 OS=Homo sapiens OX=9606 GN=XPO7 PE=1 SV=3	18	0	153.04	1.37264e+08	139540000
sp|Q9ULV4|COR1C_HUMAN;sp|Q6QEF8|CORO6_HUMAN	sp|Q9ULV4|COR1C_HUMAN	>sp|Q9ULV4|COR1C_HUMAN Coronin-1C OS=Homo sapiens OX=9606 GN=CORO1C PE=1 SV=1	18	0	323.31	7.51779e+08	776390000
sp|Q9UQ80|PA2G4_HUMAN	sp|Q9UQ80|PA2G4_HUMAN	>sp|Q9UQ80|PA2G4_HUMAN Proliferation-associated protein 2G4 OS=Homo sapiens OX=9606 GN=PA2G4 PE=1 SV=3	18	0	285.97	1.1204e+09	957440000
sp|Q9Y2J2|E41L3_HUMAN	sp|Q9Y2J2|E41L3_HUMAN	>sp|Q9Y2J2|E41L3_HUMAN Band 4.1-like protein 3 OS=Homo sapiens OX=9606 GN=EPB41L3 PE=1 SV=2	18	0	183.55	1.82296e+08	243970000
sp|Q9Y5B9|SP16H_HUMAN	sp|Q9Y5B9|SP16H_HUMAN	>sp|Q9Y5B9|SP16H_HUMAN FACT complex subunit SPT16 OS=Homo sapiens OX=9606 GN=SUPT16H PE=1 SV=1	18	0	135.96	2.92695e+08	229310000
sp|O00231|PSD11_HUMAN	sp|O00231|PSD11_HUMAN	>sp|O00231|PSD11_HUMAN 26S proteasome non-ATPase regulatory subunit 11 OS=Homo sapiens OX=9606 GN=PSMD11 PE=1 SV=3	17	0	134.36	2.70672e+08	217660000
sp|O43175|SERA_HUMAN	sp|O43175|SERA_HUMAN	>sp|O43175|SERA_HUMAN D-3-phosphoglycerate dehydrogenase OS=Homo sapiens OX=9606 GN=PHGDH PE=1 SV=4	17	0	232.2	1.40822e+09	1292100000
sp|O43776|SYNC_HUMAN	sp|O43776|SYNC_HUMAN	>sp|O43776|SYNC_HUMAN Asparagine--tRNA ligase, cytoplasmic OS=Homo sapiens OX=9606 GN=NARS PE=1 SV=1	17	0	221.3	8.3739e+08	787920000
sp|O60488|ACSL4_HUMAN	sp|O60488|ACSL4_HUMAN	>sp|O60488|ACSL4_HUMAN Long-chain-fatty-acid--CoA ligase 4 OS=Homo sapiens OX=9606 GN=ACSL4 PE=1 SV=2	17	0	147.13	1.85555e+08	215380000
sp|O60610|DIAP1_HUMAN	sp|O60610|DIAP1_HUMAN	>sp|O60610|DIAP1_HUMAN Protein diaphanous homolog 1 OS=Homo sapiens OX=9606 GN=DIAPH1 PE=1 SV=2	17	0	66.115	1.46055e+08	158260000
sp|O94979|SC31A_HUMAN	sp|O94979|SC31A_HUMAN	>sp|O94979|SC31A_HUMAN Protein transport protein Sec31A OS=Homo sapiens OX=9606 GN=SEC31A PE=1 SV=3	17	0	105.63	4.63939e+08	326910000
sp|P00505|AATM_HUMAN	sp|P00505|AATM_HUMAN	>sp|P00505|AATM_HUMAN Aspartate aminotransferase, mitochondrial OS=Homo sapiens OX=9606 GN=GOT2 PE=1 SV=3	17	0	147.24	1.57427e+08	179650000
sp|P08240|SRPRA_HUMAN	sp|P08240|SRPRA_HUMAN	>sp|P08240|SRPRA_HUMAN Signal recognition particle receptor subunit alpha OS=Homo sapiens OX=9606 GN=SRPRA PE=1 SV=2	17	0	188.3	3.11756e+08	249490000
sp|P17858|PFKAL_HUMAN	sp|P17858|PFKAL_HUMAN	>sp|P17858|PFKAL_HUMAN ATP-dependent 6-phosphofructokinase, liver type OS=Homo sapiens OX=9606 GN=PFKL PE=1 SV=6	17	0	245.57	3.25676e+08	336920000
sp|P23396|RS3_HUMAN	sp|P23396|RS3_HUMAN	>sp|P23396|RS3_HUMAN 40S ribosomal protein S3 OS=Homo sapiens OX=9606 GN=RPS3 PE=1 SV=2	17	0	240.96	2.56178e+09	2415600000
sp|P23634|AT2B4_HUMAN;sp|Q16720|AT2B3_HUMAN	sp|P23634|AT2B4_HUMAN	>sp|P23634|AT2B4_HUMAN Plasma membrane calcium-transporting ATPase 4 OS=Homo sapiens OX=9606 GN=ATP2B4 PE=1 SV=2	17	0	103.23	3.82666e+07	52624000
sp|P27824|CALX_HUMAN	sp|P27824|CALX_HUMAN	>sp|P27824|CALX_HUMAN Calnexin OS=Homo sapiens OX=9606 GN=CANX PE=1 SV=2	17	0	137.35	6.00354e+08	641740000
sp|P30622|CLIP1_HUMAN	sp|P30622|CLIP1_HUMAN	>sp|P30622|CLIP1_HUMAN CAP-Gly domain-containing linker protein 1 OS=Homo sapiens OX=9606 GN=CLIP1 PE=1 SV=2	17	0	107.33	3.06374e+07	45628000
sp|P35658|NU214_HUMAN	sp|P35658|NU214_HUMAN	>sp|P35658|NU214_HUMAN Nuclear pore complex protein Nup214 OS=Homo sapiens OX=9606 GN=NUP214 PE=1 SV=2	17	0	142.25	4.58155e+07	93821000
sp|P38919|IF4A3_HUMAN	sp|P38919|IF4A3_HUMAN	>sp|P38919|IF4A3_HUMAN Eukaryotic initiation factor 4A-III OS=Homo sapiens OX=9606 GN=EIF4A3 PE=1 SV=4	17	0	68.684	2.04433e+08	190650000
sp|P43686|PRS6B_HUMAN	sp|P43686|PRS6B_HUMAN	>sp|P43686|PRS6B_HUMAN 26S proteasome regulatory subunit 6B OS=Homo sapiens OX=9606 GN=PSMC4 PE=1 SV=2	17	0	323.31	3.5626e+08	302450000
sp|P46060|RAGP1_HUMAN	sp|P46060|RAGP1_HUMAN	>sp|P46060|RAGP1_HUMAN Ran GTPase-activating protein 1 OS=Homo sapiens OX=9606 GN=RANGAP1 PE=1 SV=1	17	0	154.92	3.05548e+08	306180000
sp|P51659|DHB4_HUMAN	sp|P51659|DHB4_HUMAN	>sp|P51659|DHB4_HUMAN Peroxisomal multifunctional enzyme type 2 OS=Homo sapiens OX=9606 GN=HSD17B4 PE=1 SV=3	17	0	101.25	1.60652e+08	215250000
sp|P54578|UBP14_HUMAN	sp|P54578|UBP14_HUMAN	>sp|P54578|UBP14_HUMAN Ubiquitin carboxyl-terminal hydrolase 14 OS=Homo sapiens OX=9606 GN=USP14 PE=1 SV=3	17	0	251.67	3.90401e+08	429750000
sp|P55084|ECHB_HUMAN	sp|P55084|ECHB_HUMAN	>sp|P55084|ECHB_HUMAN Trifunctional enzyme subunit beta, mitochondrial OS=Homo sapiens OX=9606 GN=HADHB PE=1 SV=3	17	0	126.71	4.11746e+08	446730000
sp|P63244|RACK1_HUMAN	sp|P63244|RACK1_HUMAN	>sp|P63244|RACK1_HUMAN Receptor of activated protein C kinase 1 OS=Homo sapiens OX=9606 GN=RACK1 PE=1 SV=3	17	0	323.31	2.06235e+09	1747900000
sp|Q13423|NNTM_HUMAN	sp|Q13423|NNTM_HUMAN	>sp|Q13423|NNTM_HUMAN NAD(P) transhydrogenase, mitochondrial OS=Homo sapiens OX=9606 GN=NNT PE=1 SV=3	17	0	64.473	1.48855e+08	118390000
sp|Q14166|TTL12_HUMAN	sp|Q14166|TTL12_HUMAN	>sp|Q14166|TTL12_HUMAN Tubulin--tyrosine ligase-like protein 12 OS=Homo sapiens OX=9606 GN=TTLL12 PE=1 SV=2	17	0	166.14	3.43028e+08	330080000
sp|Q14643|ITPR1_HUMAN;sp|Q14571|ITPR2_HUMAN	sp|Q14643|ITPR1_HUMAN	>sp|Q14643|ITPR1_HUMAN Inositol 1,4,5-trisphosphate receptor type 1 OS=Homo sapiens OX=9606 GN=ITPR1 PE=1 SV=3	17	0	93.23	5.99619e+07	56548000
sp|Q15008|PSMD6_HUMAN	sp|Q15008|PSMD6_HUMAN	>sp|Q15008|PSMD6_HUMAN 26S proteasome non-ATPase regulatory subunit 6 OS=Homo sapiens OX=9606 GN=PSMD6 PE=1 SV=1	17	0	100.13	2.28567e+08	230560000
sp|Q15154|PCM1_HUMAN	sp|Q15154|PCM1_HUMAN	>sp|Q15154|PCM1_HUMAN Pericentriolar material 1 protein OS=Homo sapiens OX=9606 GN=PCM1 PE=1 SV=5	17	0	146.5	2.71602e+07	17352000
sp|Q15477|SKIV2_HUMAN	sp|Q15477|SKIV2_HUMAN	>sp|Q15477|SKIV2_HUMAN Helicase SKI2W OS=Homo sapiens OX=9606 GN=SKIV2L PE=1 SV=3	17	0	79.909	4.9878e+07	58441000
sp|Q5T0N5|FBP1L_HUMAN	sp|Q5T0N5|FBP1L_HUMAN	>sp|Q5T0N5|FBP1L_HUMAN Formin-binding protein 1-like OS=Homo sapiens OX=9606 GN=FNBP1L PE=1 SV=3	17	0	167.37	434251	4223200
sp|Q86UE4|LYRIC_HUMAN	sp|Q86UE4|LYRIC_HUMAN	>sp|Q86UE4|LYRIC_HUMAN Protein LYRIC OS=Homo sapiens OX=9606 GN=MTDH PE=1 SV=2	17	0	171.72	1.31698e+08	92369000
sp|Q8TEQ6|GEMI5_HUMAN	sp|Q8TEQ6|GEMI5_HUMAN	>sp|Q8TEQ6|GEMI5_HUMAN Gem-associated protein 5 OS=Homo sapiens OX=9606 GN=GEMIN5 PE=1 SV=3	17	0	127.24	3.03333e+08	199230000
sp|Q9BTW9|TBCD_HUMAN	sp|Q9BTW9|TBCD_HUMAN	>sp|Q9BTW9|TBCD_HUMAN Tubulin-specific chaperone D OS=Homo sapiens OX=9606 GN=TBCD PE=1 SV=2	17	0	140.88	1.04941e+08	106240000
sp|Q9NSD9|SYFB_HUMAN	sp|Q9NSD9|SYFB_HUMAN	>sp|Q9NSD9|SYFB_HUMAN Phenylalanine--tRNA ligase beta subunit OS=Homo sapiens OX=9606 GN=FARSB PE=1 SV=3	17	0	148.04	4.61781e+08	400920000
sp|Q9NSE4|SYIM_HUMAN	sp|Q9NSE4|SYIM_HUMAN	>sp|Q9NSE4|SYIM_HUMAN Isoleucine--tRNA ligase, mitochondrial OS=Homo sapiens OX=9606 GN=IARS2 PE=1 SV=2	17	0	74.947	1.92441e+08	182630000
sp|O00116|ADAS_HUMAN	sp|O00116|ADAS_HUMAN	>sp|O00116|ADAS_HUMAN Alkyldihydroxyacetonephosphate synthase, peroxisomal OS=Homo sapiens OX=9606 GN=AGPS PE=1 SV=1	16	0	162.88	1.55626e+08	167300000
sp|O43747|AP1G1_HUMAN	sp|O43747|AP1G1_HUMAN	>sp|O43747|AP1G1_HUMAN AP-1 complex subunit gamma-1 OS=Homo sapiens OX=9606 GN=AP1G1 PE=1 SV=5	16	0	188.09	2.2058e+08	256010000
sp|O60264|SMCA5_HUMAN	sp|O60264|SMCA5_HUMAN	>sp|O60264|SMCA5_HUMAN SWI/SNF-related matrix-associated actin-dependent regulator of chromatin subfamily A member 5 OS=Homo sapiens OX=9606 GN=SMARCA5 PE=1 SV=1	16	0	68.27	8.63108e+07	70175000
sp|O75874|IDHC_HUMAN	sp|O75874|IDHC_HUMAN	>sp|O75874|IDHC_HUMAN Isocitrate dehydrogenase [NADP] cytoplasmic OS=Homo sapiens OX=9606 GN=IDH1 PE=1 SV=2	16	0	90.268	1.87357e+08	220080000
sp|O75955|FLOT1_HUMAN	sp|O75955|FLOT1_HUMAN	>sp|O75955|FLOT1_HUMAN Flotillin-1 OS=Homo sapiens OX=9606 GN=FLOT1 PE=1 SV=3	16	0	264.95	2.27855e+08	275610000
sp|P04406|G3P_HUMAN	sp|P04406|G3P_HUMAN	>sp|P04406|G3P_HUMAN Glyceraldehyde-3-phosphate dehydrogenase OS=Homo sapiens OX=9606 GN=GAPDH PE=1 SV=3	16	0	323.31	1.85647e+10	16331000000
sp|P04792|HSPB1_HUMAN	sp|P04792|HSPB1_HUMAN	>sp|P04792|HSPB1_HUMAN Heat shock protein beta-1 OS=Homo sapiens OX=9606 GN=HSPB1 PE=1 SV=2	16	0	323.31	2.67539e+09	3075900000
sp|P08237|PFKAM_HUMAN	sp|P08237|PFKAM_HUMAN	>sp|P08237|PFKAM_HUMAN ATP-dependent 6-phosphofructokinase, muscle type OS=Homo sapiens OX=9606 GN=PFKM PE=1 SV=2	16	0	239.97	2.80105e+08	334220000
sp|P08758|ANXA5_HUMAN	sp|P08758|ANXA5_HUMAN	>sp|P08758|ANXA5_HUMAN Annexin A5 OS=Homo sapiens OX=9606 GN=ANXA5 PE=1 SV=2	16	0	323.31	1.65874e+08	230980000
sp|P13667|PDIA4_HUMAN	sp|P13667|PDIA4_HUMAN	>sp|P13667|PDIA4_HUMAN Protein disulfide-isomerase A4 OS=Homo sapiens OX=9606 GN=PDIA4 PE=1 SV=2	16	0	84.437	6.45431e+07	74220000
sp|P14866|HNRPL_HUMAN	sp|P14866|HNRPL_HUMAN	>sp|P14866|HNRPL_HUMAN Heterogeneous nuclear ribonucleoprotein L OS=Homo sapiens OX=9606 GN=HNRNPL PE=1 SV=2	16	0	244.99	4.50248e+08	434440000
sp|P21281|VATB2_HUMAN;sp|P15313|VATB1_HUMAN	sp|P21281|VATB2_HUMAN	>sp|P21281|VATB2_HUMAN V-type proton ATPase subunit B, brain isoform OS=Homo sapiens OX=9606 GN=ATP6V1B2 PE=1 SV=3	16	0	125.97	1.45412e+08	157920000
sp|P24752|THIL_HUMAN	sp|P24752|THIL_HUMAN	>sp|P24752|THIL_HUMAN Acetyl-CoA acetyltransferase, mitochondrial OS=Homo sapiens OX=9606 GN=ACAT1 PE=1 SV=1	16	0	291.33	5.90909e+08	694560000
sp|P33527|MRP1_HUMAN	sp|P33527|MRP1_HUMAN	>sp|P33527|MRP1_HUMAN Multidrug resistance-associated protein 1 OS=Homo sapiens OX=9606 GN=ABCC1 PE=1 SV=3	16	0	110.31	4.17897e+07	44774000
sp|P36578|RL4_HUMAN	sp|P36578|RL4_HUMAN	>sp|P36578|RL4_HUMAN 60S ribosomal protein L4 OS=Homo sapiens OX=9606 GN=RPL4 PE=1 SV=5	16	0	135.24	2.55776e+09	1984500000
sp|P41250|GARS_HUMAN	sp|P41250|GARS_HUMAN	>sp|P41250|GARS_HUMAN Glycine--tRNA ligase OS=Homo sapiens OX=9606 GN=GARS PE=1 SV=3	16	0	253.47	3.42523e+08	352090000
sp|P49591|SYSC_HUMAN	sp|P49591|SYSC_HUMAN	>sp|P49591|SYSC_HUMAN Serine--tRNA ligase, cytoplasmic OS=Homo sapiens OX=9606 GN=SARS PE=1 SV=3	16	0	174.45	4.0921e+08	341210000
sp|P51114|FXR1_HUMAN	sp|P51114|FXR1_HUMAN	>sp|P51114|FXR1_HUMAN Fragile X mental retardation syndrome-related protein 1 OS=Homo sapiens OX=9606 GN=FXR1 PE=1 SV=3	16	0	207.61	3.04664e+08	282970000
sp|P61247|RS3A_HUMAN	sp|P61247|RS3A_HUMAN	>sp|P61247|RS3A_HUMAN 40S ribosomal protein S3a OS=Homo sapiens OX=9606 GN=RPS3A PE=1 SV=2	16	0	211.99	1.52194e+09	1342900000
sp|P62191|PRS4_HUMAN	sp|P62191|PRS4_HUMAN	>sp|P62191|PRS4_HUMAN 26S proteasome regulatory subunit 4 OS=Homo sapiens OX=9606 GN=PSMC1 PE=1 SV=1	16	0	255.34	4.50007e+08	380120000
sp|Q14254|FLOT2_HUMAN	sp|Q14254|FLOT2_HUMAN	>sp|Q14254|FLOT2_HUMAN Flotillin-2 OS=Homo sapiens OX=9606 GN=FLOT2 PE=1 SV=2	16	0	93.359	2.26891e+08	197910000
sp|Q15021|CND1_HUMAN	sp|Q15021|CND1_HUMAN	>sp|Q15021|CND1_HUMAN Condensin complex subunit 1 OS=Homo sapiens OX=9606 GN=NCAPD2 PE=1 SV=3	16	0	69.636	9.14899e+07	66664000
sp|Q15436|SC23A_HUMAN	sp|Q15436|SC23A_HUMAN	>sp|Q15436|SC23A_HUMAN Protein transport protein Sec23A OS=Homo sapiens OX=9606 GN=SEC23A PE=1 SV=2	16	0	230.17	2.3971e+08	213950000
sp|Q8N3C0|ASCC3_HUMAN	sp|Q8N3C0|ASCC3_HUMAN	>sp|Q8N3C0|ASCC3_HUMAN Activating signal cointegrator 1 complex subunit 3 OS=Homo sapiens OX=9606 GN=ASCC3 PE=1 SV=3	16	0	41.753	4.44786e+07	88935000
sp|Q8WX93|PALLD_HUMAN;sp|Q86TC9|MYPN_HUMAN	sp|Q8WX93|PALLD_HUMAN	>sp|Q8WX93|PALLD_HUMAN Palladin OS=Homo sapiens OX=9606 GN=PALLD PE=1 SV=3	16	0	108.47	1.618e+08	309960000
sp|Q92973|TNPO1_HUMAN	sp|Q92973|TNPO1_HUMAN	>sp|Q92973|TNPO1_HUMAN Transportin-1 OS=Homo sapiens OX=9606 GN=TNPO1 PE=1 SV=2	16	0	110.35	1.74389e+08	202610000
sp|Q92974|ARHG2_HUMAN	sp|Q92974|ARHG2_HUMAN	>sp|Q92974|ARHG2_HUMAN Rho guanine nucleotide exchange factor 2 OS=Homo sapiens OX=9606 GN=ARHGEF2 PE=1 SV=4	16	0	170.6	1.31159e+08	93721000
sp|Q96TA1|NIBA2_HUMAN	sp|Q96TA1|NIBA2_HUMAN	>sp|Q96TA1|NIBA2_HUMAN Protein Niban 2 OS=Homo sapiens OX=9606 GN=NIBAN2 PE=1 SV=3	16	0	287.7	2.29244e+08	209340000
sp|Q9Y4W6|AFG32_HUMAN	sp|Q9Y4W6|AFG32_HUMAN	>sp|Q9Y4W6|AFG32_HUMAN AFG3-like protein 2 OS=Homo sapiens OX=9606 GN=AFG3L2 PE=1 SV=2	16	0	156.57	9.0356e+07	139040000
sp|O15371|EIF3D_HUMAN	sp|O15371|EIF3D_HUMAN	>sp|O15371|EIF3D_HUMAN Eukaryotic translation initiation factor 3 subunit D OS=Homo sapiens OX=9606 GN=EIF3D PE=1 SV=1	15	0	278.26	1.52045e+08	250170000
sp|P09543|CN37_HUMAN	sp|P09543|CN37_HUMAN	>sp|P09543|CN37_HUMAN 2,3-cyclic-nucleotide 3-phosphodiesterase OS=Homo sapiens OX=9606 GN=CNP PE=1 SV=2	15	0	244.58	1.19924e+08	141220000
sp|P09651|ROA1_HUMAN;sp|Q32P51|RA1L2_HUMAN	sp|P09651|ROA1_HUMAN;sp|Q32P51|RA1L2_HUMAN	>sp|P09651|ROA1_HUMAN Heterogeneous nuclear ribonucleoprotein A1 OS=Homo sapiens OX=9606 GN=HNRNPA1 PE=1 SV=5;>sp|Q32P51|RA1L2_HUMAN Heterogeneous nuclear ribonucleoprotein A1-like 2 OS=Homo sapiens OX=9606 GN=HNRNPA1L2 PE=2 SV=2	15	0	173.47	6.50137e+08	805780000
sp|P15311|EZRI_HUMAN	sp|P15311|EZRI_HUMAN	>sp|P15311|EZRI_HUMAN Ezrin OS=Homo sapiens OX=9606 GN=EZR PE=1 SV=4	15	0	49.07	4.43626e+07	40677000
sp|P18124|RL7_HUMAN	sp|P18124|RL7_HUMAN	>sp|P18124|RL7_HUMAN 60S ribosomal protein L7 OS=Homo sapiens OX=9606 GN=RPL7 PE=1 SV=1	15	0	122.21	2.34305e+09	1696000000
sp|P23526|SAHH_HUMAN	sp|P23526|SAHH_HUMAN	>sp|P23526|SAHH_HUMAN Adenosylhomocysteinase OS=Homo sapiens OX=9606 GN=AHCY PE=1 SV=4	15	0	323.31	1.16952e+09	1324000000
sp|P25205|MCM3_HUMAN	sp|P25205|MCM3_HUMAN	>sp|P25205|MCM3_HUMAN DNA replication licensing factor MCM3 OS=Homo sapiens OX=9606 GN=MCM3 PE=1 SV=3	15	0	126.73	1.59826e+08	130450000
sp|P27348|1433T_HUMAN	sp|P27348|1433T_HUMAN	>sp|P27348|1433T_HUMAN 14-3-3 protein theta OS=Homo sapiens OX=9606 GN=YWHAQ PE=1 SV=1	15	0	323.31	5.43708e+08	573320000
sp|P31150|GDIA_HUMAN	sp|P31150|GDIA_HUMAN	>sp|P31150|GDIA_HUMAN Rab GDP dissociation inhibitor alpha OS=Homo sapiens OX=9606 GN=GDI1 PE=1 SV=2	15	0	106.22	7.1672e+07	52990000
sp|P39023|RL3_HUMAN;sp|Q92901|RL3L_HUMAN	sp|P39023|RL3_HUMAN	>sp|P39023|RL3_HUMAN 60S ribosomal protein L3 OS=Homo sapiens OX=9606 GN=RPL3 PE=1 SV=2	15	0	153.12	1.46273e+09	1099800000
sp|P46459|NSF_HUMAN	sp|P46459|NSF_HUMAN	>sp|P46459|NSF_HUMAN Vesicle-fusing ATPase OS=Homo sapiens OX=9606 GN=NSF PE=1 SV=3	15	0	108.58	1.62362e+08	185450000
sp|P49790|NU153_HUMAN	sp|P49790|NU153_HUMAN	>sp|P49790|NU153_HUMAN Nuclear pore complex protein Nup153 OS=Homo sapiens OX=9606 GN=NUP153 PE=1 SV=2	15	0	105	4.77997e+07	73276000
sp|P50454|SERPH_HUMAN	sp|P50454|SERPH_HUMAN	>sp|P50454|SERPH_HUMAN Serpin H1 OS=Homo sapiens OX=9606 GN=SERPINH1 PE=1 SV=2	15	0	323.31	7.46581e+08	929200000
sp|P51991|ROA3_HUMAN	sp|P51991|ROA3_HUMAN	>sp|P51991|ROA3_HUMAN Heterogeneous nuclear ribonucleoprotein A3 OS=Homo sapiens OX=9606 GN=HNRNPA3 PE=1 SV=2	15	0	260.24	5.77459e+08	806920000
sp|P52789|HXK2_HUMAN;sp|P52790|HXK3_HUMAN	sp|P52789|HXK2_HUMAN	>sp|P52789|HXK2_HUMAN Hexokinase-2 OS=Homo sapiens OX=9606 GN=HK2 PE=1 SV=2	15	0	47.05	8.50495e+07	96682000
sp|P60174|TPIS_HUMAN	sp|P60174|TPIS_HUMAN	>sp|P60174|TPIS_HUMAN Triosephosphate isomerase OS=Homo sapiens OX=9606 GN=TPI1 PE=1 SV=3	15	0	229.36	4.66349e+08	455090000
sp|P62195|PRS8_HUMAN	sp|P62195|PRS8_HUMAN	>sp|P62195|PRS8_HUMAN 26S proteasome regulatory subunit 8 OS=Homo sapiens OX=9606 GN=PSMC5 PE=1 SV=1	15	0	323.31	2.66713e+08	244200000
sp|P62424|RL7A_HUMAN	sp|P62424|RL7A_HUMAN	>sp|P62424|RL7A_HUMAN 60S ribosomal protein L7a OS=Homo sapiens OX=9606 GN=RPL7A PE=1 SV=2	15	0	214.32	1.75043e+09	1300500000
sp|P63104|1433Z_HUMAN	sp|P63104|1433Z_HUMAN	>sp|P63104|1433Z_HUMAN 14-3-3 protein zeta/delta OS=Homo sapiens OX=9606 GN=YWHAZ PE=1 SV=1	15	0	323.31	1.55098e+09	1540200000
sp|Q05639|EF1A2_HUMAN	sp|Q05639|EF1A2_HUMAN	>sp|Q05639|EF1A2_HUMAN Elongation factor 1-alpha 2 OS=Homo sapiens OX=9606 GN=EEF1A2 PE=1 SV=1	15	0	140.21	1.19373e+08	142150000
sp|Q14247|SRC8_HUMAN	sp|Q14247|SRC8_HUMAN	>sp|Q14247|SRC8_HUMAN Src substrate cortactin OS=Homo sapiens OX=9606 GN=CTTN PE=1 SV=2	15	0	323.31	2.53125e+08	326080000
sp|Q14C86|GAPD1_HUMAN	sp|Q14C86|GAPD1_HUMAN	>sp|Q14C86|GAPD1_HUMAN GTPase-activating protein and VPS9 domain-containing protein 1 OS=Homo sapiens OX=9606 GN=GAPVD1 PE=1 SV=2	15	0	115.4	1.38526e+08	109370000
sp|Q8WUM0|NU133_HUMAN	sp|Q8WUM0|NU133_HUMAN	>sp|Q8WUM0|NU133_HUMAN Nuclear pore complex protein Nup133 OS=Homo sapiens OX=9606 GN=NUP133 PE=1 SV=2	15	0	75.527	5.17325e+07	60257000
sp|Q8WWM7|ATX2L_HUMAN	sp|Q8WWM7|ATX2L_HUMAN	>sp|Q8WWM7|ATX2L_HUMAN Ataxin-2-like protein OS=Homo sapiens OX=9606 GN=ATXN2L PE=1 SV=2	15	0	85.415	1.25765e+08	117020000
sp|Q96I99|SUCB2_HUMAN	sp|Q96I99|SUCB2_HUMAN	>sp|Q96I99|SUCB2_HUMAN Succinate--CoA ligase [GDP-forming] subunit beta, mitochondrial OS=Homo sapiens OX=9606 GN=SUCLG2 PE=1 SV=2	15	0	80.122	2.91088e+08	259260000
sp|Q99798|ACON_HUMAN	sp|Q99798|ACON_HUMAN	>sp|Q99798|ACON_HUMAN Aconitate hydratase, mitochondrial OS=Homo sapiens OX=9606 GN=ACO2 PE=1 SV=2	15	0	93.634	1.92624e+08	132290000
sp|Q99873|ANM1_HUMAN;sp|Q9NR22|ANM8_HUMAN	sp|Q99873|ANM1_HUMAN	>sp|Q99873|ANM1_HUMAN Protein arginine N-methyltransferase 1 OS=Homo sapiens OX=9606 GN=PRMT1 PE=1 SV=3	15	0	77.164	4.60255e+08	512550000
sp|Q9H2G2|SLK_HUMAN	sp|Q9H2G2|SLK_HUMAN	>sp|Q9H2G2|SLK_HUMAN STE20-like serine/threonine-protein kinase OS=Homo sapiens OX=9606 GN=SLK PE=1 SV=1	15	0	105.01	7.59663e+07	112040000
sp|Q9HCE1|MOV10_HUMAN	sp|Q9HCE1|MOV10_HUMAN	>sp|Q9HCE1|MOV10_HUMAN Helicase MOV-10 OS=Homo sapiens OX=9606 GN=MOV10 PE=1 SV=2	15	0	43.799	1.38331e+08	77946000
sp|Q9HD20|AT131_HUMAN	sp|Q9HD20|AT131_HUMAN	>sp|Q9HD20|AT131_HUMAN Manganese-transporting ATPase 13A1 OS=Homo sapiens OX=9606 GN=ATP13A1 PE=1 SV=2	15	0	44.093	1.07278e+08	133610000
sp|Q9NTJ5|SAC1_HUMAN	sp|Q9NTJ5|SAC1_HUMAN	>sp|Q9NTJ5|SAC1_HUMAN Phosphatidylinositide phosphatase SAC1 OS=Homo sapiens OX=9606 GN=SACM1L PE=1 SV=2	15	0	143.89	1.8186e+08	195870000
sp|Q9UBB4|ATX10_HUMAN	sp|Q9UBB4|ATX10_HUMAN	>sp|Q9UBB4|ATX10_HUMAN Ataxin-10 OS=Homo sapiens OX=9606 GN=ATXN10 PE=1 SV=1	15	0	182.64	2.24195e+08	210920000
sp|Q9ULW0|TPX2_HUMAN	sp|Q9ULW0|TPX2_HUMAN	>sp|Q9ULW0|TPX2_HUMAN Targeting protein for Xklp2 OS=Homo sapiens OX=9606 GN=TPX2 PE=1 SV=2	15	0	116.93	0	0
sp|Q9UMR2|DD19B_HUMAN	sp|Q9UMR2|DD19B_HUMAN	>sp|Q9UMR2|DD19B_HUMAN ATP-dependent RNA helicase DDX19B OS=Homo sapiens OX=9606 GN=DDX19B PE=1 SV=1	15	0	27.435	5.51225e+06	5897400
sp|Q9UNM6|PSD13_HUMAN	sp|Q9UNM6|PSD13_HUMAN	>sp|Q9UNM6|PSD13_HUMAN 26S proteasome non-ATPase regulatory subunit 13 OS=Homo sapiens OX=9606 GN=PSMD13 PE=1 SV=2	15	0	132.04	3.69492e+08	342080000
sp|Q9UPU5|UBP24_HUMAN	sp|Q9UPU5|UBP24_HUMAN	>sp|Q9UPU5|UBP24_HUMAN Ubiquitin carboxyl-terminal hydrolase 24 OS=Homo sapiens OX=9606 GN=USP24 PE=1 SV=3	15	0	44.018	7.31765e+07	70777000
sp|Q9Y265|RUVB1_HUMAN	sp|Q9Y265|RUVB1_HUMAN	>sp|Q9Y265|RUVB1_HUMAN RuvB-like 1 OS=Homo sapiens OX=9606 GN=RUVBL1 PE=1 SV=1	15	0	189.67	3.93086e+08	357220000
sp|Q9Y3I0|RTCB_HUMAN	sp|Q9Y3I0|RTCB_HUMAN	>sp|Q9Y3I0|RTCB_HUMAN tRNA-splicing ligase RtcB homolog OS=Homo sapiens OX=9606 GN=RTCB PE=1 SV=1	15	0	101.71	3.92719e+08	388300000
sp|Q9Y3P9|RBGP1_HUMAN;sp|B7ZAP0|RBG10_HUMAN	sp|Q9Y3P9|RBGP1_HUMAN	>sp|Q9Y3P9|RBGP1_HUMAN Rab GTPase-activating protein 1 OS=Homo sapiens OX=9606 GN=RABGAP1 PE=1 SV=3	15	0	71.595	6.09672e+07	72196000
sp|Q9Y4L1|HYOU1_HUMAN	sp|Q9Y4L1|HYOU1_HUMAN	>sp|Q9Y4L1|HYOU1_HUMAN Hypoxia up-regulated protein 1 OS=Homo sapiens OX=9606 GN=HYOU1 PE=1 SV=1	15	0	102.61	7.61958e+07	81971000
sp|Q9Y520|PRC2C_HUMAN	sp|Q9Y520|PRC2C_HUMAN	>sp|Q9Y520|PRC2C_HUMAN Protein PRRC2C OS=Homo sapiens OX=9606 GN=PRRC2C PE=1 SV=4	15	0	54.934	6.81374e+07	74213000
sp|O00203|AP3B1_HUMAN;sp|Q13367|AP3B2_HUMAN	sp|O00203|AP3B1_HUMAN	>sp|O00203|AP3B1_HUMAN AP-3 complex subunit beta-1 OS=Homo sapiens OX=9606 GN=AP3B1 PE=1 SV=3	14	0	72.858	1.53893e+08	156000000
sp|O00299|CLIC1_HUMAN	sp|O00299|CLIC1_HUMAN	>sp|O00299|CLIC1_HUMAN Chloride intracellular channel protein 1 OS=Homo sapiens OX=9606 GN=CLIC1 PE=1 SV=4	14	0	302.35	1.60732e+09	1479900000
sp|O14744|ANM5_HUMAN	sp|O14744|ANM5_HUMAN	>sp|O14744|ANM5_HUMAN Protein arginine N-methyltransferase 5 OS=Homo sapiens OX=9606 GN=PRMT5 PE=1 SV=4	14	0	122.41	2.38012e+08	222620000
sp|O43491|E41L2_HUMAN	sp|O43491|E41L2_HUMAN	>sp|O43491|E41L2_HUMAN Band 4.1-like protein 2 OS=Homo sapiens OX=9606 GN=EPB41L2 PE=1 SV=1	14	0	114.91	1.17778e+08	127730000
sp|O75694|NU155_HUMAN	sp|O75694|NU155_HUMAN	>sp|O75694|NU155_HUMAN Nuclear pore complex protein Nup155 OS=Homo sapiens OX=9606 GN=NUP155 PE=1 SV=1	14	0	102.39	1.09633e+08	97454000
sp|O94826|TOM70_HUMAN	sp|O94826|TOM70_HUMAN	>sp|O94826|TOM70_HUMAN Mitochondrial import receptor subunit TOM70 OS=Homo sapiens OX=9606 GN=TOMM70 PE=1 SV=1	14	0	128.24	1.98041e+08	194440000
sp|P04899|GNAI2_HUMAN	sp|P04899|GNAI2_HUMAN	>sp|P04899|GNAI2_HUMAN Guanine nucleotide-binding protein G(i) subunit alpha-2 OS=Homo sapiens OX=9606 GN=GNAI2 PE=1 SV=3	14	0	178.63	5.32932e+08	654210000
sp|P05388|RLA0_HUMAN;sp|Q8NHW5|RLA0L_HUMAN	sp|P05388|RLA0_HUMAN;sp|Q8NHW5|RLA0L_HUMAN	>sp|P05388|RLA0_HUMAN 60S acidic ribosomal protein P0 OS=Homo sapiens OX=9606 GN=RPLP0 PE=1 SV=1;>sp|Q8NHW5|RLA0L_HUMAN 60S acidic ribosomal protein P0-like OS=Homo sapiens OX=9606 GN=RPLP0P6 PE=5 SV=1	14	0	200.73	1.2705e+09	873420000
sp|P09936|UCHL1_HUMAN	sp|P09936|UCHL1_HUMAN	>sp|P09936|UCHL1_HUMAN Ubiquitin carboxyl-terminal hydrolase isozyme L1 OS=Homo sapiens OX=9606 GN=UCHL1 PE=1 SV=2	14	0	249.88	5.7311e+08	574000000
sp|P0DMV9|HS71B_HUMAN;sp|P0DMV8|HS71A_HUMAN	sp|P0DMV9|HS71B_HUMAN;sp|P0DMV8|HS71A_HUMAN	>sp|P0DMV9|HS71B_HUMAN Heat shock 70 kDa protein 1B OS=Homo sapiens OX=9606 GN=HSPA1B PE=1 SV=1;>sp|P0DMV8|HS71A_HUMAN Heat shock 70 kDa protein 1A OS=Homo sapiens OX=9606 GN=HSPA1A PE=1 SV=1	14	0	73.159	1.51827e+08	197400000
sp|P11310|ACADM_HUMAN	sp|P11310|ACADM_HUMAN	>sp|P11310|ACADM_HUMAN Medium-chain specific acyl-CoA dehydrogenase, mitochondrial OS=Homo sapiens OX=9606 GN=ACADM PE=1 SV=1	14	0	147.38	2.21383e+08	195620000
sp|P11388|TOP2A_HUMAN	sp|P11388|TOP2A_HUMAN	>sp|P11388|TOP2A_HUMAN DNA topoisomerase 2-alpha OS=Homo sapiens OX=9606 GN=TOP2A PE=1 SV=3	14	0	55.658	9.86359e+07	71656000
sp|P12931|SRC_HUMAN	sp|P12931|SRC_HUMAN	>sp|P12931|SRC_HUMAN Proto-oncogene tyrosine-protein kinase Src OS=Homo sapiens OX=9606 GN=SRC PE=1 SV=3	14	0	86.923	1.4812e+08	182420000
sp|P14735|IDE_HUMAN	sp|P14735|IDE_HUMAN	>sp|P14735|IDE_HUMAN Insulin-degrading enzyme OS=Homo sapiens OX=9606 GN=IDE PE=1 SV=4	14	0	39.2	1.17881e+08	135090000
sp|P21796|VDAC1_HUMAN	sp|P21796|VDAC1_HUMAN	>sp|P21796|VDAC1_HUMAN Voltage-dependent anion-selective channel protein 1 OS=Homo sapiens OX=9606 GN=VDAC1 PE=1 SV=2	14	0	155.03	5.10899e+08	379570000
sp|P22626|ROA2_HUMAN	sp|P22626|ROA2_HUMAN	>sp|P22626|ROA2_HUMAN Heterogeneous nuclear ribonucleoproteins A2/B1 OS=Homo sapiens OX=9606 GN=HNRNPA2B1 PE=1 SV=2	14	0	127.54	3.83297e+08	383910000
sp|P23381|SYWC_HUMAN	sp|P23381|SYWC_HUMAN	>sp|P23381|SYWC_HUMAN Tryptophan--tRNA ligase, cytoplasmic OS=Homo sapiens OX=9606 GN=WARS PE=1 SV=2	14	0	185.33	4.04413e+08	397990000
sp|P26196|DDX6_HUMAN	sp|P26196|DDX6_HUMAN	>sp|P26196|DDX6_HUMAN Probable ATP-dependent RNA helicase DDX6 OS=Homo sapiens OX=9606 GN=DDX6 PE=1 SV=2	14	0	214.09	3.08267e+08	225450000
sp|P27816|MAP4_HUMAN	sp|P27816|MAP4_HUMAN	>sp|P27816|MAP4_HUMAN Microtubule-associated protein 4 OS=Homo sapiens OX=9606 GN=MAP4 PE=1 SV=3	14	0	79.874	7.47131e+07	84555000
sp|P28331|NDUS1_HUMAN	sp|P28331|NDUS1_HUMAN	>sp|P28331|NDUS1_HUMAN NADH-ubiquinone oxidoreductase 75 kDa subunit, mitochondrial OS=Homo sapiens OX=9606 GN=NDUFS1 PE=1 SV=3	14	0	95.224	9.40433e+07	108900000
sp|P33992|MCM5_HUMAN	sp|P33992|MCM5_HUMAN	>sp|P33992|MCM5_HUMAN DNA replication licensing factor MCM5 OS=Homo sapiens OX=9606 GN=MCM5 PE=1 SV=5	14	0	146.66	1.49796e+08	137480000
sp|P37802|TAGL2_HUMAN;sp|Q9UI15|TAGL3_HUMAN	sp|P37802|TAGL2_HUMAN	>sp|P37802|TAGL2_HUMAN Transgelin-2 OS=Homo sapiens OX=9606 GN=TAGLN2 PE=1 SV=3	14	0	259.73	1.60009e+09	1765100000
sp|P41091|IF2G_HUMAN;sp|Q2VIR3|IF2GL_HUMAN	sp|P41091|IF2G_HUMAN;sp|Q2VIR3|IF2GL_HUMAN	>sp|P41091|IF2G_HUMAN Eukaryotic translation initiation factor 2 subunit 3 OS=Homo sapiens OX=9606 GN=EIF2S3 PE=1 SV=3;>sp|Q2VIR3|IF2GL_HUMAN Eukaryotic translation initiation factor 2 subunit 3B OS=Homo sapiens OX=9606 GN=EIF2S3B PE=2 SV=2	14	0	200.43	4.19791e+08	435480000
sp|P49419|AL7A1_HUMAN	sp|P49419|AL7A1_HUMAN	>sp|P49419|AL7A1_HUMAN Alpha-aminoadipic semialdehyde dehydrogenase OS=Homo sapiens OX=9606 GN=ALDH7A1 PE=1 SV=5	14	0	84.527	2.47743e+08	236170000
sp|P49915|GUAA_HUMAN	sp|P49915|GUAA_HUMAN	>sp|P49915|GUAA_HUMAN GMP synthase [glutamine-hydrolyzing] OS=Homo sapiens OX=9606 GN=GMPS PE=1 SV=1	14	0	122.35	1.72403e+08	153610000
sp|P50395|GDIB_HUMAN	sp|P50395|GDIB_HUMAN	>sp|P50395|GDIB_HUMAN Rab GDP dissociation inhibitor beta OS=Homo sapiens OX=9606 GN=GDI2 PE=1 SV=2	14	0	43.577	4.4373e+07	31292000
sp|P52948|NUP98_HUMAN	sp|P52948|NUP98_HUMAN	>sp|P52948|NUP98_HUMAN Nuclear pore complex protein Nup98-Nup96 OS=Homo sapiens OX=9606 GN=NUP98 PE=1 SV=4	14	0	46.59	7.63542e+07	88070000
sp|P53992|SC24C_HUMAN	sp|P53992|SC24C_HUMAN	>sp|P53992|SC24C_HUMAN Protein transport protein Sec24C OS=Homo sapiens OX=9606 GN=SEC24C PE=1 SV=3	14	0	115.26	1.04898e+08	118210000
sp|P55809|SCOT1_HUMAN;sp|Q9BYC2|SCOT2_HUMAN	sp|P55809|SCOT1_HUMAN	>sp|P55809|SCOT1_HUMAN Succinyl-CoA:3-ketoacid coenzyme A transferase 1, mitochondrial OS=Homo sapiens OX=9606 GN=OXCT1 PE=1 SV=1	14	0	195.77	1.19017e+08	87686000
sp|P61221|ABCE1_HUMAN	sp|P61221|ABCE1_HUMAN	>sp|P61221|ABCE1_HUMAN ATP-binding cassette sub-family E member 1 OS=Homo sapiens OX=9606 GN=ABCE1 PE=1 SV=1	14	0	238.2	2.89412e+08	189120000
sp|P62136|PP1A_HUMAN	sp|P62136|PP1A_HUMAN	>sp|P62136|PP1A_HUMAN Serine/threonine-protein phosphatase PP1-alpha catalytic subunit OS=Homo sapiens OX=9606 GN=PPP1CA PE=1 SV=1	14	0	178.31	5.53922e+08	591990000
sp|P62258|1433E_HUMAN	sp|P62258|1433E_HUMAN	>sp|P62258|1433E_HUMAN 14-3-3 protein epsilon OS=Homo sapiens OX=9606 GN=YWHAE PE=1 SV=1	14	0	93.346	2.26455e+08	221800000
sp|P78347|GTF2I_HUMAN;sp|Q86UP8|GTD2A_HUMAN;sp|Q6EKJ0|GTD2B_HUMAN	sp|P78347|GTF2I_HUMAN	>sp|P78347|GTF2I_HUMAN General transcription factor II-I OS=Homo sapiens OX=9606 GN=GTF2I PE=1 SV=2	14	0	121.74	1.46869e+08	164120000
sp|Q05682|CALD1_HUMAN	sp|Q05682|CALD1_HUMAN	>sp|Q05682|CALD1_HUMAN Caldesmon OS=Homo sapiens OX=9606 GN=CALD1 PE=1 SV=3	14	0	207.02	8.9656e+07	120670000
sp|Q07866|KLC1_HUMAN	sp|Q07866|KLC1_HUMAN	>sp|Q07866|KLC1_HUMAN Kinesin light chain 1 OS=Homo sapiens OX=9606 GN=KLC1 PE=1 SV=2	14	0	69.582	1.19671e+08	123780000
sp|Q08J23|NSUN2_HUMAN	sp|Q08J23|NSUN2_HUMAN	>sp|Q08J23|NSUN2_HUMAN tRNA (cytosine(34)-C(5))-methyltransferase OS=Homo sapiens OX=9606 GN=NSUN2 PE=1 SV=2	14	0	93.688	1.46617e+08	117170000
sp|Q12931|TRAP1_HUMAN	sp|Q12931|TRAP1_HUMAN	>sp|Q12931|TRAP1_HUMAN Heat shock protein 75 kDa, mitochondrial OS=Homo sapiens OX=9606 GN=TRAP1 PE=1 SV=3	14	0	83.818	7.30445e+07	147780000
sp|Q13263|TIF1B_HUMAN	sp|Q13263|TIF1B_HUMAN	>sp|Q13263|TIF1B_HUMAN Transcription intermediary factor 1-beta OS=Homo sapiens OX=9606 GN=TRIM28 PE=1 SV=5	14	0	157.01	2.29795e+08	375910000
sp|Q13347|EIF3I_HUMAN	sp|Q13347|EIF3I_HUMAN	>sp|Q13347|EIF3I_HUMAN Eukaryotic translation initiation factor 3 subunit I OS=Homo sapiens OX=9606 GN=EIF3I PE=1 SV=1	14	0	318.96	2.77902e+08	175560000
sp|Q14677|EPN4_HUMAN	sp|Q14677|EPN4_HUMAN	>sp|Q14677|EPN4_HUMAN Clathrin interactor 1 OS=Homo sapiens OX=9606 GN=CLINT1 PE=1 SV=1	14	0	125.43	2.43371e+08	309330000
sp|Q15084|PDIA6_HUMAN	sp|Q15084|PDIA6_HUMAN	>sp|Q15084|PDIA6_HUMAN Protein disulfide-isomerase A6 OS=Homo sapiens OX=9606 GN=PDIA6 PE=1 SV=1	14	0	298.6	4.37682e+08	445820000
sp|Q15365|PCBP1_HUMAN	sp|Q15365|PCBP1_HUMAN	>sp|Q15365|PCBP1_HUMAN Poly(rC)-binding protein 1 OS=Homo sapiens OX=9606 GN=PCBP1 PE=1 SV=2	14	0	323.31	6.26657e+08	661390000
sp|Q58FF8|H90B2_HUMAN	sp|Q58FF8|H90B2_HUMAN	>sp|Q58FF8|H90B2_HUMAN Putative heat shock protein HSP 90-beta 2 OS=Homo sapiens OX=9606 GN=HSP90AB2P PE=1 SV=2	14	0	101.64	3.1754e+08	259740000
sp|Q6SZW1|SARM1_HUMAN	sp|Q6SZW1|SARM1_HUMAN	>sp|Q6SZW1|SARM1_HUMAN Sterile alpha and TIR motif-containing protein 1 OS=Homo sapiens OX=9606 GN=SARM1 PE=1 SV=1	14	0	112.68	8.71875e+07	84808000
sp|Q8N1G4|LRC47_HUMAN	sp|Q8N1G4|LRC47_HUMAN	>sp|Q8N1G4|LRC47_HUMAN Leucine-rich repeat-containing protein 47 OS=Homo sapiens OX=9606 GN=LRRC47 PE=1 SV=1	14	0	97.025	2.13384e+08	231790000
sp|Q96A65|EXOC4_HUMAN	sp|Q96A65|EXOC4_HUMAN	>sp|Q96A65|EXOC4_HUMAN Exocyst complex component 4 OS=Homo sapiens OX=9606 GN=EXOC4 PE=1 SV=1	14	0	113.93	8.27853e+07	75556000
sp|Q9BTV4|TMM43_HUMAN	sp|Q9BTV4|TMM43_HUMAN	>sp|Q9BTV4|TMM43_HUMAN Transmembrane protein 43 OS=Homo sapiens OX=9606 GN=TMEM43 PE=1 SV=1	14	0	272.53	2.66965e+08	331310000
sp|Q9HAV4|XPO5_HUMAN	sp|Q9HAV4|XPO5_HUMAN	>sp|Q9HAV4|XPO5_HUMAN Exportin-5 OS=Homo sapiens OX=9606 GN=XPO5 PE=1 SV=1	14	0	64.066	5.43008e+07	52435000
sp|Q9NYL9|TMOD3_HUMAN;sp|P28289|TMOD1_HUMAN	sp|Q9NYL9|TMOD3_HUMAN	>sp|Q9NYL9|TMOD3_HUMAN Tropomodulin-3 OS=Homo sapiens OX=9606 GN=TMOD3 PE=1 SV=1	14	0	323.31	5.96567e+08	400760000
sp|Q9UM54|MYO6_HUMAN	sp|Q9UM54|MYO6_HUMAN	>sp|Q9UM54|MYO6_HUMAN Unconventional myosin-VI OS=Homo sapiens OX=9606 GN=MYO6 PE=1 SV=4	14	0	81.253	5.49986e+07	56053000
sp|Q9Y263|PLAP_HUMAN	sp|Q9Y263|PLAP_HUMAN	>sp|Q9Y263|PLAP_HUMAN Phospholipase A-2-activating protein OS=Homo sapiens OX=9606 GN=PLAA PE=1 SV=2	14	0	75.271	1.42095e+08	110990000
sp|Q9Y3F4|STRAP_HUMAN	sp|Q9Y3F4|STRAP_HUMAN	>sp|Q9Y3F4|STRAP_HUMAN Serine-threonine kinase receptor-associated protein OS=Homo sapiens OX=9606 GN=STRAP PE=1 SV=1	14	0	252.75	3.85478e+08	364510000
sp|Q9Y5S2|MRCKB_HUMAN	sp|Q9Y5S2|MRCKB_HUMAN	>sp|Q9Y5S2|MRCKB_HUMAN Serine/threonine-protein kinase MRCK beta OS=Homo sapiens OX=9606 GN=CDC42BPB PE=1 SV=2	14	0	44.68	2.16299e+07	51680000
sp|Q9Y6M1|IF2B2_HUMAN;sp|Q9NZI8|IF2B1_HUMAN	sp|Q9Y6M1|IF2B2_HUMAN	>sp|Q9Y6M1|IF2B2_HUMAN Insulin-like growth factor 2 mRNA-binding protein 2 OS=Homo sapiens OX=9606 GN=IGF2BP2 PE=1 SV=2	14	0	161.09	2.82137e+08	244300000
sp|O43143|DHX15_HUMAN	sp|O43143|DHX15_HUMAN	>sp|O43143|DHX15_HUMAN Pre-mRNA-splicing factor ATP-dependent RNA helicase DHX15 OS=Homo sapiens OX=9606 GN=DHX15 PE=1 SV=2	13	0	64.812	1.89778e+08	177280000
sp|O43390|HNRPR_HUMAN	sp|O43390|HNRPR_HUMAN	>sp|O43390|HNRPR_HUMAN Heterogeneous nuclear ribonucleoprotein R OS=Homo sapiens OX=9606 GN=HNRNPR PE=1 SV=1	13	0	50.721	1.27429e+08	113380000
sp|O43852|CALU_HUMAN	sp|O43852|CALU_HUMAN	>sp|O43852|CALU_HUMAN Calumenin OS=Homo sapiens OX=9606 GN=CALU PE=1 SV=2	13	0	220.65	3.1521e+08	327140000
sp|O75131|CPNE3_HUMAN;sp|Q8IYJ1|CPNE9_HUMAN;sp|Q96A23|CPNE4_HUMAN;sp|O95741|CPNE6_HUMAN;sp|Q86YQ8|CPNE8_HUMAN;sp|Q9HCH3|CPNE5_HUMAN;sp|Q9UBL6|CPNE7_HUMAN	sp|O75131|CPNE3_HUMAN	>sp|O75131|CPNE3_HUMAN Copine-3 OS=Homo sapiens OX=9606 GN=CPNE3 PE=1 SV=1	13	0	64.528	3.89184e+08	300680000
sp|O95340|PAPS2_HUMAN	sp|O95340|PAPS2_HUMAN	>sp|O95340|PAPS2_HUMAN Bifunctional 3-phosphoadenosine 5-phosphosulfate synthase 2 OS=Homo sapiens OX=9606 GN=PAPSS2 PE=1 SV=2	13	0	83.254	1.25616e+08	143130000
sp|O95347|SMC2_HUMAN	sp|O95347|SMC2_HUMAN	>sp|O95347|SMC2_HUMAN Structural maintenance of chromosomes protein 2 OS=Homo sapiens OX=9606 GN=SMC2 PE=1 SV=2	13	0	33.571	2.04135e+08	130950000
sp|O95831|AIFM1_HUMAN	sp|O95831|AIFM1_HUMAN	>sp|O95831|AIFM1_HUMAN Apoptosis-inducing factor 1, mitochondrial OS=Homo sapiens OX=9606 GN=AIFM1 PE=1 SV=1	13	0	80.851	1.59378e+08	152900000
sp|P08243|ASNS_HUMAN	sp|P08243|ASNS_HUMAN	>sp|P08243|ASNS_HUMAN Asparagine synthetase [glutamine-hydrolyzing] OS=Homo sapiens OX=9606 GN=ASNS PE=1 SV=4	13	0	59.541	1.77361e+08	125840000
sp|P13798|ACPH_HUMAN	sp|P13798|ACPH_HUMAN	>sp|P13798|ACPH_HUMAN Acylamino-acid-releasing enzyme OS=Homo sapiens OX=9606 GN=APEH PE=1 SV=4	13	0	87.449	1.2409e+08	158270000
sp|P14923|PLAK_HUMAN	sp|P14923|PLAK_HUMAN	>sp|P14923|PLAK_HUMAN Junction plakoglobin OS=Homo sapiens OX=9606 GN=JUP PE=1 SV=3	13	0	58.722	1.18065e+08	143680000
sp|P21399|ACOC_HUMAN	sp|P21399|ACOC_HUMAN	>sp|P21399|ACOC_HUMAN Cytoplasmic aconitate hydratase OS=Homo sapiens OX=9606 GN=ACO1 PE=1 SV=3	13	0	103.93	6.10453e+07	92559000
sp|P21980|TGM2_HUMAN	sp|P21980|TGM2_HUMAN	>sp|P21980|TGM2_HUMAN Protein-glutamine gamma-glutamyltransferase 2 OS=Homo sapiens OX=9606 GN=TGM2 PE=1 SV=2	13	0	96.534	7.84314e+07	104320000
sp|P22234|PUR6_HUMAN	sp|P22234|PUR6_HUMAN	>sp|P22234|PUR6_HUMAN Multifunctional protein ADE2 OS=Homo sapiens OX=9606 GN=PAICS PE=1 SV=3	13	0	83.585	1.38767e+08	108280000
sp|P23246|SFPQ_HUMAN	sp|P23246|SFPQ_HUMAN	>sp|P23246|SFPQ_HUMAN Splicing factor, proline- and glutamine-rich OS=Homo sapiens OX=9606 GN=SFPQ PE=1 SV=2	13	0	177.77	2.48512e+08	182070000
sp|P23528|COF1_HUMAN	sp|P23528|COF1_HUMAN	>sp|P23528|COF1_HUMAN Cofilin-1 OS=Homo sapiens OX=9606 GN=CFL1 PE=1 SV=3	13	0	272.79	1.8435e+09	2081300000
sp|P30041|PRDX6_HUMAN	sp|P30041|PRDX6_HUMAN	>sp|P30041|PRDX6_HUMAN Peroxiredoxin-6 OS=Homo sapiens OX=9606 GN=PRDX6 PE=1 SV=3	13	0	87.738	1.59837e+08	182620000
sp|P30154|2AAB_HUMAN	sp|P30154|2AAB_HUMAN	>sp|P30154|2AAB_HUMAN Serine/threonine-protein phosphatase 2A 65 kDa regulatory subunit A beta isoform OS=Homo sapiens OX=9606 GN=PPP2R1B PE=1 SV=3	13	0	35.781	8.05842e+07	40325000
sp|P30566|PUR8_HUMAN	sp|P30566|PUR8_HUMAN	>sp|P30566|PUR8_HUMAN Adenylosuccinate lyase OS=Homo sapiens OX=9606 GN=ADSL PE=1 SV=2	13	0	130.12	2.3209e+08	189420000
sp|P31948|STIP1_HUMAN	sp|P31948|STIP1_HUMAN	>sp|P31948|STIP1_HUMAN Stress-induced-phosphoprotein 1 OS=Homo sapiens OX=9606 GN=STIP1 PE=1 SV=1	13	0	61.293	1.4633e+08	154590000
sp|P32455|GBP1_HUMAN;sp|P32456|GBP2_HUMAN;sp|Q9H0R5|GBP3_HUMAN	sp|P32455|GBP1_HUMAN	>sp|P32455|GBP1_HUMAN Guanylate-binding protein 1 OS=Homo sapiens OX=9606 GN=GBP1 PE=1 SV=2	13	0	138.4	1.87219e+08	250090000
sp|P33991|MCM4_HUMAN	sp|P33991|MCM4_HUMAN	>sp|P33991|MCM4_HUMAN DNA replication licensing factor MCM4 OS=Homo sapiens OX=9606 GN=MCM4 PE=1 SV=5	13	0	69.125	1.14232e+08	86164000
sp|P39656|OST48_HUMAN	sp|P39656|OST48_HUMAN	>sp|P39656|OST48_HUMAN Dolichyl-diphosphooligosaccharide--protein glycosyltransferase 48 kDa subunit OS=Homo sapiens OX=9606 GN=DDOST PE=1 SV=4	13	0	284.79	4.33413e+08	467590000
sp|P40926|MDHM_HUMAN	sp|P40926|MDHM_HUMAN	>sp|P40926|MDHM_HUMAN Malate dehydrogenase, mitochondrial OS=Homo sapiens OX=9606 GN=MDH2 PE=1 SV=3	13	0	192.25	6.11256e+08	532980000
sp|P43246|MSH2_HUMAN	sp|P43246|MSH2_HUMAN	>sp|P43246|MSH2_HUMAN DNA mismatch repair protein Msh2 OS=Homo sapiens OX=9606 GN=MSH2 PE=1 SV=1	13	0	40.214	5.46761e+07	45667000
sp|P52306|GDS1_HUMAN	sp|P52306|GDS1_HUMAN	>sp|P52306|GDS1_HUMAN Rap1 GTPase-GDP dissociation stimulator 1 OS=Homo sapiens OX=9606 GN=RAP1GDS1 PE=1 SV=3	13	0	97.225	7.48141e+08	671370000
sp|P52788|SPSY_HUMAN	sp|P52788|SPSY_HUMAN	>sp|P52788|SPSY_HUMAN Spermine synthase OS=Homo sapiens OX=9606 GN=SMS PE=1 SV=2	13	0	323.31	3.18297e+08	243730000
sp|P62140|PP1B_HUMAN	sp|P62140|PP1B_HUMAN	>sp|P62140|PP1B_HUMAN Serine/threonine-protein phosphatase PP1-beta catalytic subunit OS=Homo sapiens OX=9606 GN=PPP1CB PE=1 SV=3	13	0	37.399	1.44046e+08	151960000
sp|P62241|RS8_HUMAN	sp|P62241|RS8_HUMAN	>sp|P62241|RS8_HUMAN 40S ribosomal protein S8 OS=Homo sapiens OX=9606 GN=RPS8 PE=1 SV=2	13	0	236.26	1.71348e+09	1422000000
sp|Q12905|ILF2_HUMAN	sp|Q12905|ILF2_HUMAN	>sp|Q12905|ILF2_HUMAN Interleukin enhancer-binding factor 2 OS=Homo sapiens OX=9606 GN=ILF2 PE=1 SV=2	13	0	240.93	1.07684e+09	874190000
sp|Q13045|FLII_HUMAN	sp|Q13045|FLII_HUMAN	>sp|Q13045|FLII_HUMAN Protein flightless-1 homolog OS=Homo sapiens OX=9606 GN=FLII PE=1 SV=2	13	0	140.07	8.44012e+07	82899000
sp|Q13557|KCC2D_HUMAN;sp|Q9UQM7|KCC2A_HUMAN	sp|Q13557|KCC2D_HUMAN	>sp|Q13557|KCC2D_HUMAN Calcium/calmodulin-dependent protein kinase type II subunit delta OS=Homo sapiens OX=9606 GN=CAMK2D PE=1 SV=3	13	0	152.65	2.90537e+08	296520000
sp|Q13838|DX39B_HUMAN	sp|Q13838|DX39B_HUMAN	>sp|Q13838|DX39B_HUMAN Spliceosome RNA helicase DDX39B OS=Homo sapiens OX=9606 GN=DDX39B PE=1 SV=1	13	0	121.9	4.93857e+08	494270000
sp|Q14258|TRI25_HUMAN	sp|Q14258|TRI25_HUMAN	>sp|Q14258|TRI25_HUMAN E3 ubiquitin/ISG15 ligase TRIM25 OS=Homo sapiens OX=9606 GN=TRIM25 PE=1 SV=2	13	0	236.65	1.98087e+08	210670000
sp|Q15155|NOMO1_HUMAN;sp|P69849|NOMO3_HUMAN;sp|Q5JPE7|NOMO2_HUMAN	sp|Q15155|NOMO1_HUMAN;sp|P69849|NOMO3_HUMAN;sp|Q5JPE7|NOMO2_HUMAN	>sp|Q15155|NOMO1_HUMAN Nodal modulator 1 OS=Homo sapiens OX=9606 GN=NOMO1 PE=1 SV=5;>sp|P69849|NOMO3_HUMAN Nodal modulator 3 OS=Homo sapiens OX=9606 GN=NOMO3 PE=3 SV=2;>sp|Q5JPE7|NOMO2_HUMAN Nodal modulator 2 OS=Homo sapiens OX=9606 GN=NOMO2 PE=1 SV=1	13	0	33.007	3.81863e+07	46682000
sp|Q15293|RCN1_HUMAN	sp|Q15293|RCN1_HUMAN	>sp|Q15293|RCN1_HUMAN Reticulocalbin-1 OS=Homo sapiens OX=9606 GN=RCN1 PE=1 SV=1	13	0	211.12	3.97562e+08	438290000
sp|Q15366|PCBP2_HUMAN	sp|Q15366|PCBP2_HUMAN	>sp|Q15366|PCBP2_HUMAN Poly(rC)-binding protein 2 OS=Homo sapiens OX=9606 GN=PCBP2 PE=1 SV=1	13	0	165.76	6.56701e+08	594060000
sp|Q15942|ZYX_HUMAN	sp|Q15942|ZYX_HUMAN	>sp|Q15942|ZYX_HUMAN Zyxin OS=Homo sapiens OX=9606 GN=ZYX PE=1 SV=1	13	0	323.31	2.88885e+08	312600000
sp|Q7L1Q6|BZW1_HUMAN	sp|Q7L1Q6|BZW1_HUMAN	>sp|Q7L1Q6|BZW1_HUMAN Basic leucine zipper and W2 domain-containing protein 1 OS=Homo sapiens OX=9606 GN=BZW1 PE=1 SV=1	13	0	116.55	1.82858e+08	133720000
sp|Q92945|FUBP2_HUMAN	sp|Q92945|FUBP2_HUMAN	>sp|Q92945|FUBP2_HUMAN Far upstream element-binding protein 2 OS=Homo sapiens OX=9606 GN=KHSRP PE=1 SV=4	13	0	68.228	1.00365e+08	95154000
sp|Q96G03|PGM2_HUMAN	sp|Q96G03|PGM2_HUMAN	>sp|Q96G03|PGM2_HUMAN Phosphoglucomutase-2 OS=Homo sapiens OX=9606 GN=PGM2 PE=1 SV=4	13	0	99.5	2.22737e+08	193450000
sp|Q96I24|FUBP3_HUMAN	sp|Q96I24|FUBP3_HUMAN	>sp|Q96I24|FUBP3_HUMAN Far upstream element-binding protein 3 OS=Homo sapiens OX=9606 GN=FUBP3 PE=1 SV=2	13	0	110.03	1.93118e+08	185630000
sp|Q96KP4|CNDP2_HUMAN	sp|Q96KP4|CNDP2_HUMAN	>sp|Q96KP4|CNDP2_HUMAN Cytosolic non-specific dipeptidase OS=Homo sapiens OX=9606 GN=CNDP2 PE=1 SV=2	13	0	56.842	8.42451e+07	92740000
sp|Q96P70|IPO9_HUMAN	sp|Q96P70|IPO9_HUMAN	>sp|Q96P70|IPO9_HUMAN Importin-9 OS=Homo sapiens OX=9606 GN=IPO9 PE=1 SV=3	13	0	148.26	9.51369e+07	111250000
sp|Q9BXS5|AP1M1_HUMAN;sp|Q9Y6Q5|AP1M2_HUMAN	sp|Q9BXS5|AP1M1_HUMAN	>sp|Q9BXS5|AP1M1_HUMAN AP-1 complex subunit mu-1 OS=Homo sapiens OX=9606 GN=AP1M1 PE=1 SV=3	13	0	72.989	1.05193e+08	195480000
sp|Q9UBE0|SAE1_HUMAN	sp|Q9UBE0|SAE1_HUMAN	>sp|Q9UBE0|SAE1_HUMAN SUMO-activating enzyme subunit 1 OS=Homo sapiens OX=9606 GN=SAE1 PE=1 SV=1	13	0	207.47	1.35738e+08	183660000
sp|Q9UJS0|CMC2_HUMAN	sp|Q9UJS0|CMC2_HUMAN	>sp|Q9UJS0|CMC2_HUMAN Calcium-binding mitochondrial carrier protein Aralar2 OS=Homo sapiens OX=9606 GN=SLC25A13 PE=1 SV=2	13	0	100.54	1.17904e+08	102700000
sp|Q9Y2A7|NCKP1_HUMAN	sp|Q9Y2A7|NCKP1_HUMAN	>sp|Q9Y2A7|NCKP1_HUMAN Nck-associated protein 1 OS=Homo sapiens OX=9606 GN=NCKAP1 PE=1 SV=1	13	0	68.583	1.46376e+08	99931000
sp|Q9Y4G6|TLN2_HUMAN	sp|Q9Y4G6|TLN2_HUMAN	>sp|Q9Y4G6|TLN2_HUMAN Talin-2 OS=Homo sapiens OX=9606 GN=TLN2 PE=1 SV=4	13	0	12.881	3.84433e+06	2636400
sp|Q9Y696|CLIC4_HUMAN;sp|O15247|CLIC2_HUMAN;sp|Q9NZA1|CLIC5_HUMAN	sp|Q9Y696|CLIC4_HUMAN	>sp|Q9Y696|CLIC4_HUMAN Chloride intracellular channel protein 4 OS=Homo sapiens OX=9606 GN=CLIC4 PE=1 SV=4	13	0	211.23	3.00475e+08	322350000
sp|A1L0T0|ILVBL_HUMAN	sp|A1L0T0|ILVBL_HUMAN	>sp|A1L0T0|ILVBL_HUMAN Acetolactate synthase-like protein OS=Homo sapiens OX=9606 GN=ILVBL PE=1 SV=2	12	0	193.42	1.07304e+08	124450000
sp|O15355|PPM1G_HUMAN	sp|O15355|PPM1G_HUMAN	>sp|O15355|PPM1G_HUMAN Protein phosphatase 1G OS=Homo sapiens OX=9606 GN=PPM1G PE=1 SV=1	12	0	304.62	1.76489e+08	140050000
sp|O43264|ZW10_HUMAN	sp|O43264|ZW10_HUMAN	>sp|O43264|ZW10_HUMAN Centromere/kinetochore protein zw10 homolog OS=Homo sapiens OX=9606 GN=ZW10 PE=1 SV=3	12	0	65.335	7.0871e+07	83062000
sp|O43615|TIM44_HUMAN	sp|O43615|TIM44_HUMAN	>sp|O43615|TIM44_HUMAN Mitochondrial import inner membrane translocase subunit TIM44 OS=Homo sapiens OX=9606 GN=TIMM44 PE=1 SV=2	12	0	127.49	9.40123e+07	102020000
sp|O60216|RAD21_HUMAN	sp|O60216|RAD21_HUMAN	>sp|O60216|RAD21_HUMAN Double-strand-break repair protein rad21 homolog OS=Homo sapiens OX=9606 GN=RAD21 PE=1 SV=2	12	0	152.29	3.14453e+08	227230000
sp|O60701|UGDH_HUMAN	sp|O60701|UGDH_HUMAN	>sp|O60701|UGDH_HUMAN UDP-glucose 6-dehydrogenase OS=Homo sapiens OX=9606 GN=UGDH PE=1 SV=1	12	0	133.52	1.68215e+08	189600000
sp|O75153|CLU_HUMAN	sp|O75153|CLU_HUMAN	>sp|O75153|CLU_HUMAN Clustered mitochondria protein homolog OS=Homo sapiens OX=9606 GN=CLUH PE=1 SV=2	12	0	86.702	6.84037e+07	73618000
sp|O75821|EIF3G_HUMAN	sp|O75821|EIF3G_HUMAN	>sp|O75821|EIF3G_HUMAN Eukaryotic translation initiation factor 3 subunit G OS=Homo sapiens OX=9606 GN=EIF3G PE=1 SV=2	12	0	198.33	2.1988e+08	163530000
sp|O76094|SRP72_HUMAN	sp|O76094|SRP72_HUMAN	>sp|O76094|SRP72_HUMAN Signal recognition particle subunit SRP72 OS=Homo sapiens OX=9606 GN=SRP72 PE=1 SV=3	12	0	163.88	3.80796e+08	333200000
sp|O94915|FRYL_HUMAN	sp|O94915|FRYL_HUMAN	>sp|O94915|FRYL_HUMAN Protein furry homolog-like OS=Homo sapiens OX=9606 GN=FRYL PE=1 SV=2	12	0	29.132	4.28295e+07	27194000
sp|O95163|ELP1_HUMAN	sp|O95163|ELP1_HUMAN	>sp|O95163|ELP1_HUMAN Elongator complex protein 1 OS=Homo sapiens OX=9606 GN=ELP1 PE=1 SV=3	12	0	45.086	7.13082e+07	79509000
sp|P01892|1A02_HUMAN;sp|P30512|1A29_HUMAN;sp|P16189|1A31_HUMAN	sp|P01892|1A02_HUMAN;sp|P30512|1A29_HUMAN;sp|P16189|1A31_HUMAN	>sp|P01892|1A02_HUMAN HLA class I histocompatibility antigen, A-2 alpha chain OS=Homo sapiens OX=9606 GN=HLA-A PE=1 SV=1;>sp|P30512|1A29_HUMAN HLA class I histocompatibility antigen, A-29 alpha chain OS=Homo sapiens OX=9606 GN=HLA-A PE=1 SV=2;>sp|P16189|1A	12	0	236.13	1.92154e+08	291370000
sp|P04181|OAT_HUMAN	sp|P04181|OAT_HUMAN	>sp|P04181|OAT_HUMAN Ornithine aminotransferase, mitochondrial OS=Homo sapiens OX=9606 GN=OAT PE=1 SV=1	12	0	133.77	1.56831e+08	125470000
sp|P07910|HNRPC_HUMAN;sp|P0DMR1|HNRC4_HUMAN;sp|O60812|HNRC1_HUMAN;sp|B7ZW38|HNRC3_HUMAN;sp|B2RXH8|HNRC2_HUMAN	sp|P07910|HNRPC_HUMAN;sp|P0DMR1|HNRC4_HUMAN;sp|O60812|HNRC1_HUMAN;sp|B7ZW38|HNRC3_HUMAN;sp|B2RXH8|HNRC2_HUMAN	>sp|P07910|HNRPC_HUMAN Heterogeneous nuclear ribonucleoproteins C1/C2 OS=Homo sapiens OX=9606 GN=HNRNPC PE=1 SV=4;>sp|P0DMR1|HNRC4_HUMAN Heterogeneous nuclear ribonucleoprotein C-like 4 OS=Homo sapiens OX=9606 GN=HNRNPCL4 PE=3 SV=1;>sp|O60812|HNRC1_HUMAN H	12	0	188.98	1.33167e+09	1247400000
sp|P08559|ODPA_HUMAN;sp|P29803|ODPAT_HUMAN	sp|P08559|ODPA_HUMAN	>sp|P08559|ODPA_HUMAN Pyruvate dehydrogenase E1 component subunit alpha, somatic form, mitochondrial OS=Homo sapiens OX=9606 GN=PDHA1 PE=1 SV=3	12	0	122.04	2.03928e+08	184440000
sp|P08754|GNAI3_HUMAN	sp|P08754|GNAI3_HUMAN	>sp|P08754|GNAI3_HUMAN Guanine nucleotide-binding protein G(i) subunit alpha OS=Homo sapiens OX=9606 GN=GNAI3 PE=1 SV=3	12	0	202.79	9.20258e+07	103780000
sp|P09525|ANXA4_HUMAN	sp|P09525|ANXA4_HUMAN	>sp|P09525|ANXA4_HUMAN Annexin A4 OS=Homo sapiens OX=9606 GN=ANXA4 PE=1 SV=4	12	0	211.85	2.07841e+08	206760000
sp|P09622|DLDH_HUMAN	sp|P09622|DLDH_HUMAN	>sp|P09622|DLDH_HUMAN Dihydrolipoyl dehydrogenase, mitochondrial OS=Homo sapiens OX=9606 GN=DLD PE=1 SV=2	12	0	179.99	3.28591e+08	240360000
sp|P10316|1A69_HUMAN;sp|P01891|1A68_HUMAN;sp|P30453|1A34_HUMAN;sp|P30457|1A66_HUMAN;sp|P30450|1A26_HUMAN;sp|P18462|1A25_HUMAN;sp|P30456|1A43_HUMAN;sp|P16190|1A33_HUMAN	sp|P10316|1A69_HUMAN;sp|P01891|1A68_HUMAN;sp|P30453|1A34_HUMAN;sp|P30457|1A66_HUMAN;sp|P30450|1A26_HUMAN;sp|P18462|1A25_HUMAN;sp|P30456|1A43_HUMAN;sp|P16190|1A33_HUMAN	>sp|P10316|1A69_HUMAN HLA class I histocompatibility antigen, A-69 alpha chain OS=Homo sapiens OX=9606 GN=HLA-A PE=1 SV=2;>sp|P01891|1A68_HUMAN HLA class I histocompatibility antigen, A-68 alpha chain OS=Homo sapiens OX=9606 GN=HLA-A PE=1 SV=4;>sp|P30453|1	12	0	43.379	2.63752e+07	34330000
sp|P13489|RINI_HUMAN	sp|P13489|RINI_HUMAN	>sp|P13489|RINI_HUMAN Ribonuclease inhibitor OS=Homo sapiens OX=9606 GN=RNH1 PE=1 SV=2	12	0	309.49	5.70321e+08	557760000
sp|P15104|GLNA_HUMAN	sp|P15104|GLNA_HUMAN	>sp|P15104|GLNA_HUMAN Glutamine synthetase OS=Homo sapiens OX=9606 GN=GLUL PE=1 SV=4	12	0	275.92	9.75652e+07	50528000
sp|P23258|TBG1_HUMAN;sp|Q9NRH3|TBG2_HUMAN	sp|P23258|TBG1_HUMAN;sp|Q9NRH3|TBG2_HUMAN	>sp|P23258|TBG1_HUMAN Tubulin gamma-1 chain OS=Homo sapiens OX=9606 GN=TUBG1 PE=1 SV=2;>sp|Q9NRH3|TBG2_HUMAN Tubulin gamma-2 chain OS=Homo sapiens OX=9606 GN=TUBG2 PE=2 SV=1	12	0	192.38	1.1632e+08	108310000
sp|P27695|APEX1_HUMAN	sp|P27695|APEX1_HUMAN	>sp|P27695|APEX1_HUMAN DNA-(apurinic or apyrimidinic site) lyase OS=Homo sapiens OX=9606 GN=APEX1 PE=1 SV=2	12	0	188.64	2.46263e+08	170510000
sp|P27797|CALR_HUMAN	sp|P27797|CALR_HUMAN	>sp|P27797|CALR_HUMAN Calreticulin OS=Homo sapiens OX=9606 GN=CALR PE=1 SV=1	12	0	229.82	1.6569e+08	285940000
sp|P28288|ABCD3_HUMAN	sp|P28288|ABCD3_HUMAN	>sp|P28288|ABCD3_HUMAN ATP-binding cassette sub-family D member 3 OS=Homo sapiens OX=9606 GN=ABCD3 PE=1 SV=1	12	0	174.78	1.88665e+08	204040000
sp|P28838|AMPL_HUMAN	sp|P28838|AMPL_HUMAN	>sp|P28838|AMPL_HUMAN Cytosol aminopeptidase OS=Homo sapiens OX=9606 GN=LAP3 PE=1 SV=3	12	0	96.811	1.22506e+08	120650000
sp|P30084|ECHM_HUMAN	sp|P30084|ECHM_HUMAN	>sp|P30084|ECHM_HUMAN Enoyl-CoA hydratase, mitochondrial OS=Homo sapiens OX=9606 GN=ECHS1 PE=1 SV=4	12	0	206.31	3.44153e+08	381810000
sp|P31943|HNRH1_HUMAN	sp|P31943|HNRH1_HUMAN	>sp|P31943|HNRH1_HUMAN Heterogeneous nuclear ribonucleoprotein H OS=Homo sapiens OX=9606 GN=HNRNPH1 PE=1 SV=4	12	0	323.31	8.09664e+08	816550000
sp|P35237|SPB6_HUMAN	sp|P35237|SPB6_HUMAN	>sp|P35237|SPB6_HUMAN Serpin B6 OS=Homo sapiens OX=9606 GN=SERPINB6 PE=1 SV=3	12	0	179.45	1.47707e+08	167220000
sp|P36873|PP1G_HUMAN	sp|P36873|PP1G_HUMAN	>sp|P36873|PP1G_HUMAN Serine/threonine-protein phosphatase PP1-gamma catalytic subunit OS=Homo sapiens OX=9606 GN=PPP1CC PE=1 SV=1	12	0	29.229	3.78695e+07	0
sp|P36957|ODO2_HUMAN	sp|P36957|ODO2_HUMAN	>sp|P36957|ODO2_HUMAN Dihydrolipoyllysine-residue succinyltransferase component of 2-oxoglutarate dehydrogenase complex, mitochondrial OS=Homo sapiens OX=9606 GN=DLST PE=1 SV=4	12	0	323.31	2.31275e+08	113050000
sp|P61163|ACTZ_HUMAN	sp|P61163|ACTZ_HUMAN	>sp|P61163|ACTZ_HUMAN Alpha-centractin OS=Homo sapiens OX=9606 GN=ACTR1A PE=1 SV=1	12	0	149.6	2.61767e+08	288330000
sp|P62937|PPIA_HUMAN;sp|Q9Y536|PAL4A_HUMAN;sp|P0DN26|PAL4F_HUMAN;sp|F5H284|PAL4D_HUMAN;sp|A0A0B4J2A2|PAL4C_HUMAN;sp|A0A075B767|PAL4H_HUMAN;sp|A0A075B759|PAL4E_HUMAN	sp|P62937|PPIA_HUMAN	>sp|P62937|PPIA_HUMAN Peptidyl-prolyl cis-trans isomerase A OS=Homo sapiens OX=9606 GN=PPIA PE=1 SV=2	12	0	287.68	6.3166e+09	6209300000
sp|P63096|GNAI1_HUMAN;sp|P11488|GNAT1_HUMAN;sp|P09471|GNAO_HUMAN;sp|P19087|GNAT2_HUMAN;sp|A8MTJ3|GNAT3_HUMAN;sp|P38405|GNAL_HUMAN	sp|P63096|GNAI1_HUMAN	>sp|P63096|GNAI1_HUMAN Guanine nucleotide-binding protein G(i) subunit alpha-1 OS=Homo sapiens OX=9606 GN=GNAI1 PE=1 SV=2	12	0	132.57	1.06683e+08	117340000
sp|P63241|IF5A1_HUMAN;sp|Q9GZV4|IF5A2_HUMAN;sp|Q6IS14|IF5AL_HUMAN	sp|P63241|IF5A1_HUMAN;sp|Q9GZV4|IF5A2_HUMAN;sp|Q6IS14|IF5AL_HUMAN	>sp|P63241|IF5A1_HUMAN Eukaryotic translation initiation factor 5A-1 OS=Homo sapiens OX=9606 GN=EIF5A PE=1 SV=2;>sp|Q9GZV4|IF5A2_HUMAN Eukaryotic translation initiation factor 5A-2 OS=Homo sapiens OX=9606 GN=EIF5A2 PE=1 SV=3;>sp|Q6IS14|IF5AL_HUMAN Eukaryot	12	0	323.31	1.2308e+09	1124800000
sp|P78417|GSTO1_HUMAN	sp|P78417|GSTO1_HUMAN	>sp|P78417|GSTO1_HUMAN Glutathione S-transferase omega-1 OS=Homo sapiens OX=9606 GN=GSTO1 PE=1 SV=2	12	0	68.426	4.60967e+08	382330000
sp|Q01995|TAGL_HUMAN	sp|Q01995|TAGL_HUMAN	>sp|Q01995|TAGL_HUMAN Transgelin OS=Homo sapiens OX=9606 GN=TAGLN PE=1 SV=4	12	0	54.009	7.23755e+07	111580000
sp|Q08945|SSRP1_HUMAN	sp|Q08945|SSRP1_HUMAN	>sp|Q08945|SSRP1_HUMAN FACT complex subunit SSRP1 OS=Homo sapiens OX=9606 GN=SSRP1 PE=1 SV=1	12	0	63.63	1.60296e+08	180540000
sp|Q12765|SCRN1_HUMAN	sp|Q12765|SCRN1_HUMAN	>sp|Q12765|SCRN1_HUMAN Secernin-1 OS=Homo sapiens OX=9606 GN=SCRN1 PE=1 SV=2	12	0	173.93	2.35349e+08	198640000
sp|Q12769|NU160_HUMAN	sp|Q12769|NU160_HUMAN	>sp|Q12769|NU160_HUMAN Nuclear pore complex protein Nup160 OS=Homo sapiens OX=9606 GN=NUP160 PE=1 SV=3	12	0	57.917	4.84332e+07	86673000
sp|Q13561|DCTN2_HUMAN	sp|Q13561|DCTN2_HUMAN	>sp|Q13561|DCTN2_HUMAN Dynactin subunit 2 OS=Homo sapiens OX=9606 GN=DCTN2 PE=1 SV=4	12	0	151.41	2.40559e+08	130150000
sp|Q13619|CUL4A_HUMAN	sp|Q13619|CUL4A_HUMAN	>sp|Q13619|CUL4A_HUMAN Cullin-4A OS=Homo sapiens OX=9606 GN=CUL4A PE=1 SV=3	12	0	20.489	6.46154e+06	8605600
sp|Q14103|HNRPD_HUMAN	sp|Q14103|HNRPD_HUMAN	>sp|Q14103|HNRPD_HUMAN Heterogeneous nuclear ribonucleoprotein D0 OS=Homo sapiens OX=9606 GN=HNRNPD PE=1 SV=1	12	0	209.84	7.90476e+08	879590000
sp|Q14195|DPYL3_HUMAN;sp|Q14117|DPYS_HUMAN	sp|Q14195|DPYL3_HUMAN	>sp|Q14195|DPYL3_HUMAN Dihydropyrimidinase-related protein 3 OS=Homo sapiens OX=9606 GN=DPYSL3 PE=1 SV=1	12	0	72.61	7.87504e+07	92946000
sp|Q15181|IPYR_HUMAN	sp|Q15181|IPYR_HUMAN	>sp|Q15181|IPYR_HUMAN Inorganic pyrophosphatase OS=Homo sapiens OX=9606 GN=PPA1 PE=1 SV=2	12	0	144.71	2.34833e+08	236470000
sp|Q15233|NONO_HUMAN	sp|Q15233|NONO_HUMAN	>sp|Q15233|NONO_HUMAN Non-POU domain-containing octamer-binding protein OS=Homo sapiens OX=9606 GN=NONO PE=1 SV=4	12	0	136.83	1.61696e+08	152420000
sp|Q16513|PKN2_HUMAN	sp|Q16513|PKN2_HUMAN	>sp|Q16513|PKN2_HUMAN Serine/threonine-protein kinase N2 OS=Homo sapiens OX=9606 GN=PKN2 PE=1 SV=1	12	0	131.03	4.46025e+07	50248000
sp|Q86V48|LUZP1_HUMAN	sp|Q86V48|LUZP1_HUMAN	>sp|Q86V48|LUZP1_HUMAN Leucine zipper protein 1 OS=Homo sapiens OX=9606 GN=LUZP1 PE=1 SV=2	12	0	39.498	3.26939e+07	23404000
sp|Q8TAT6|NPL4_HUMAN	sp|Q8TAT6|NPL4_HUMAN	>sp|Q8TAT6|NPL4_HUMAN Nuclear protein localization protein 4 homolog OS=Homo sapiens OX=9606 GN=NPLOC4 PE=1 SV=3	12	0	47.703	1.01741e+08	112030000
sp|Q8WVM8|SCFD1_HUMAN	sp|Q8WVM8|SCFD1_HUMAN	>sp|Q8WVM8|SCFD1_HUMAN Sec1 family domain-containing protein 1 OS=Homo sapiens OX=9606 GN=SCFD1 PE=1 SV=4	12	0	91.946	9.79256e+07	102240000
sp|Q92538|GBF1_HUMAN	sp|Q92538|GBF1_HUMAN	>sp|Q92538|GBF1_HUMAN Golgi-specific brefeldin A-resistance guanine nucleotide exchange factor 1 OS=Homo sapiens OX=9606 GN=GBF1 PE=1 SV=2	12	0	49.729	4.78812e+07	60704000
sp|Q92734|TFG_HUMAN	sp|Q92734|TFG_HUMAN	>sp|Q92734|TFG_HUMAN Protein TFG OS=Homo sapiens OX=9606 GN=TFG PE=1 SV=2	12	0	313.24	6.63586e+08	250290000
sp|Q92878|RAD50_HUMAN	sp|Q92878|RAD50_HUMAN	>sp|Q92878|RAD50_HUMAN DNA repair protein RAD50 OS=Homo sapiens OX=9606 GN=RAD50 PE=1 SV=1	12	0	73.532	4.52463e+07	73734000
sp|Q96P48|ARAP1_HUMAN	sp|Q96P48|ARAP1_HUMAN	>sp|Q96P48|ARAP1_HUMAN Arf-GAP with Rho-GAP domain, ANK repeat and PH domain-containing protein 1 OS=Homo sapiens OX=9606 GN=ARAP1 PE=1 SV=3	12	0	29.532	6.79285e+07	59374000
sp|Q9BY44|EIF2A_HUMAN	sp|Q9BY44|EIF2A_HUMAN	>sp|Q9BY44|EIF2A_HUMAN Eukaryotic translation initiation factor 2A OS=Homo sapiens OX=9606 GN=EIF2A PE=1 SV=3	12	0	100.9	1.93783e+08	181070000
sp|Q9BZF1|OSBL8_HUMAN;sp|Q9H0X9|OSBL5_HUMAN	sp|Q9BZF1|OSBL8_HUMAN	>sp|Q9BZF1|OSBL8_HUMAN Oxysterol-binding protein-related protein 8 OS=Homo sapiens OX=9606 GN=OSBPL8 PE=1 SV=3	12	0	58.234	7.89925e+07	110910000
sp|Q9H2U2|IPYR2_HUMAN	sp|Q9H2U2|IPYR2_HUMAN	>sp|Q9H2U2|IPYR2_HUMAN Inorganic pyrophosphatase 2, mitochondrial OS=Homo sapiens OX=9606 GN=PPA2 PE=1 SV=2	12	0	95.223	1.52321e+08	155670000
sp|Q9H3U1|UN45A_HUMAN	sp|Q9H3U1|UN45A_HUMAN	>sp|Q9H3U1|UN45A_HUMAN Protein unc-45 homolog A OS=Homo sapiens OX=9606 GN=UNC45A PE=1 SV=1	12	0	75.447	1.1834e+08	86257000
sp|Q9NR12|PDLI7_HUMAN	sp|Q9NR12|PDLI7_HUMAN	>sp|Q9NR12|PDLI7_HUMAN PDZ and LIM domain protein 7 OS=Homo sapiens OX=9606 GN=PDLIM7 PE=1 SV=1	12	0	202.44	1.58219e+08	241150000
sp|Q9NZT2|OGFR_HUMAN	sp|Q9NZT2|OGFR_HUMAN	>sp|Q9NZT2|OGFR_HUMAN Opioid growth factor receptor OS=Homo sapiens OX=9606 GN=OGFR PE=1 SV=3	12	0	148.63	2.54927e+06	7134700
sp|Q9UBT2|SAE2_HUMAN	sp|Q9UBT2|SAE2_HUMAN	>sp|Q9UBT2|SAE2_HUMAN SUMO-activating enzyme subunit 2 OS=Homo sapiens OX=9606 GN=UBA2 PE=1 SV=2	12	0	152.05	1.34705e+08	130090000
sp|Q9UJZ1|STML2_HUMAN	sp|Q9UJZ1|STML2_HUMAN	>sp|Q9UJZ1|STML2_HUMAN Stomatin-like protein 2, mitochondrial OS=Homo sapiens OX=9606 GN=STOML2 PE=1 SV=1	12	0	150.76	1.69007e+08	126530000
sp|Q9Y285|SYFA_HUMAN	sp|Q9Y285|SYFA_HUMAN	>sp|Q9Y285|SYFA_HUMAN Phenylalanine--tRNA ligase alpha subunit OS=Homo sapiens OX=9606 GN=FARSA PE=1 SV=3	12	0	321.24	3.08325e+08	256220000
sp|Q9Y2Z0|SGT1_HUMAN	sp|Q9Y2Z0|SGT1_HUMAN	>sp|Q9Y2Z0|SGT1_HUMAN Protein SGT1 homolog OS=Homo sapiens OX=9606 GN=SUGT1 PE=1 SV=3	12	0	71.654	1.52734e+08	168460000
sp|Q9Y570|PPME1_HUMAN	sp|Q9Y570|PPME1_HUMAN	>sp|Q9Y570|PPME1_HUMAN Protein phosphatase methylesterase 1 OS=Homo sapiens OX=9606 GN=PPME1 PE=1 SV=3	12	0	323.31	1.23757e+08	190720000
sp|O00148|DX39A_HUMAN	sp|O00148|DX39A_HUMAN	>sp|O00148|DX39A_HUMAN ATP-dependent RNA helicase DDX39A OS=Homo sapiens OX=9606 GN=DDX39A PE=1 SV=2	11	0	26.269	2.90813e+07	27825000
sp|O00303|EIF3F_HUMAN	sp|O00303|EIF3F_HUMAN	>sp|O00303|EIF3F_HUMAN Eukaryotic translation initiation factor 3 subunit F OS=Homo sapiens OX=9606 GN=EIF3F PE=1 SV=1	11	0	171.51	2.35223e+08	252330000
sp|O14579|COPE_HUMAN	sp|O14579|COPE_HUMAN	>sp|O14579|COPE_HUMAN Coatomer subunit epsilon OS=Homo sapiens OX=9606 GN=COPE PE=1 SV=3	11	0	142.69	2.04031e+08	193770000
sp|O15144|ARPC2_HUMAN	sp|O15144|ARPC2_HUMAN	>sp|O15144|ARPC2_HUMAN Actin-related protein 2/3 complex subunit 2 OS=Homo sapiens OX=9606 GN=ARPC2 PE=1 SV=1	11	0	56.614	1.26603e+08	151590000
sp|O60664|PLIN3_HUMAN	sp|O60664|PLIN3_HUMAN	>sp|O60664|PLIN3_HUMAN Perilipin-3 OS=Homo sapiens OX=9606 GN=PLIN3 PE=1 SV=3	11	0	117.57	4.14145e+07	39230000
sp|O76024|WFS1_HUMAN	sp|O76024|WFS1_HUMAN	>sp|O76024|WFS1_HUMAN Wolframin OS=Homo sapiens OX=9606 GN=WFS1 PE=1 SV=2	11	0	36.477	1.05052e+08	148360000
sp|O95487|SC24B_HUMAN	sp|O95487|SC24B_HUMAN	>sp|O95487|SC24B_HUMAN Protein transport protein Sec24B OS=Homo sapiens OX=9606 GN=SEC24B PE=1 SV=2	11	0	88.201	7.57391e+07	115450000
sp|O95747|OXSR1_HUMAN	sp|O95747|OXSR1_HUMAN	>sp|O95747|OXSR1_HUMAN Serine/threonine-protein kinase OSR1 OS=Homo sapiens OX=9606 GN=OXSR1 PE=1 SV=1	11	0	68.847	1.37689e+08	161870000
sp|P00387|NB5R3_HUMAN	sp|P00387|NB5R3_HUMAN	>sp|P00387|NB5R3_HUMAN NADH-cytochrome b5 reductase 3 OS=Homo sapiens OX=9606 GN=CYB5R3 PE=1 SV=3	11	0	103.59	2.25652e+08	424440000
sp|P05455|LA_HUMAN	sp|P05455|LA_HUMAN	>sp|P05455|LA_HUMAN Lupus La protein OS=Homo sapiens OX=9606 GN=SSB PE=1 SV=2	11	0	48.595	3.66187e+07	29070000
sp|P06744|G6PI_HUMAN;CON__Q3ZBD7	sp|P06744|G6PI_HUMAN	>sp|P06744|G6PI_HUMAN Glucose-6-phosphate isomerase OS=Homo sapiens OX=9606 GN=GPI PE=1 SV=4	11	0	117.12	1.29506e+08	147540000
sp|P07947|YES_HUMAN;sp|P06239|LCK_HUMAN	sp|P07947|YES_HUMAN	>sp|P07947|YES_HUMAN Tyrosine-protein kinase Yes OS=Homo sapiens OX=9606 GN=YES1 PE=1 SV=3	11	0	29.653	5.19379e+07	53592000
sp|P11717|MPRI_HUMAN	sp|P11717|MPRI_HUMAN	>sp|P11717|MPRI_HUMAN Cation-independent mannose-6-phosphate receptor OS=Homo sapiens OX=9606 GN=IGF2R PE=1 SV=3	11	0	36.338	2.94152e+07	54194000
sp|P12268|IMDH2_HUMAN;sp|P20839|IMDH1_HUMAN	sp|P12268|IMDH2_HUMAN	>sp|P12268|IMDH2_HUMAN Inosine-5-monophosphate dehydrogenase 2 OS=Homo sapiens OX=9606 GN=IMPDH2 PE=1 SV=2	11	0	58.939	5.25576e+07	34955000
sp|P13804|ETFA_HUMAN	sp|P13804|ETFA_HUMAN	>sp|P13804|ETFA_HUMAN Electron transfer flavoprotein subunit alpha, mitochondrial OS=Homo sapiens OX=9606 GN=ETFA PE=1 SV=1	11	0	110.43	1.98201e+08	186350000
sp|P15880|RS2_HUMAN	sp|P15880|RS2_HUMAN	>sp|P15880|RS2_HUMAN 40S ribosomal protein S2 OS=Homo sapiens OX=9606 GN=RPS2 PE=1 SV=2	11	0	141.25	7.5948e+08	751150000
sp|P18669|PGAM1_HUMAN;sp|P15259|PGAM2_HUMAN;sp|Q8N0Y7|PGAM4_HUMAN	sp|P18669|PGAM1_HUMAN	>sp|P18669|PGAM1_HUMAN Phosphoglycerate mutase 1 OS=Homo sapiens OX=9606 GN=PGAM1 PE=1 SV=2	11	0	105.85	9.94806e+07	133600000
sp|P19525|E2AK2_HUMAN	sp|P19525|E2AK2_HUMAN	>sp|P19525|E2AK2_HUMAN Interferon-induced, double-stranded RNA-activated protein kinase OS=Homo sapiens OX=9606 GN=EIF2AK2 PE=1 SV=2	11	0	70.309	2.05821e+08	183760000
sp|P20042|IF2B_HUMAN	sp|P20042|IF2B_HUMAN	>sp|P20042|IF2B_HUMAN Eukaryotic translation initiation factor 2 subunit 2 OS=Homo sapiens OX=9606 GN=EIF2S2 PE=1 SV=2	11	0	239.76	4.09945e+08	402920000
sp|P27694|RFA1_HUMAN	sp|P27694|RFA1_HUMAN	>sp|P27694|RFA1_HUMAN Replication protein A 70 kDa DNA-binding subunit OS=Homo sapiens OX=9606 GN=RPA1 PE=1 SV=2	11	0	78.215	1.4011e+08	85801000
sp|P30508|1C12_HUMAN;sp|Q07000|1C15_HUMAN;sp|Q29960|1C16_HUMAN;sp|P30505|1C08_HUMAN;sp|P30510|1C14_HUMAN;sp|P30504|1C04_HUMAN;sp|Q9TNN7|1C05_HUMAN;sp|P30501|1C02_HUMAN;sp|P04222|1C03_HUMAN	sp|P30508|1C12_HUMAN;sp|Q07000|1C15_HUMAN;sp|Q29960|1C16_HUMAN;sp|P30505|1C08_HUMAN;sp|P30510|1C14_HUMAN;sp|P30504|1C04_HUMAN;sp|Q9TNN7|1C05_HUMAN;sp|P30501|1C02_HUMAN;sp|P04222|1C03_HUMAN	>sp|P30508|1C12_HUMAN HLA class I histocompatibility antigen, Cw-12 alpha chain OS=Homo sapiens OX=9606 GN=HLA-C PE=1 SV=2;>sp|Q07000|1C15_HUMAN HLA class I histocompatibility antigen, Cw-15 alpha chain OS=Homo sapiens OX=9606 GN=HLA-C PE=1 SV=1;>sp|Q29960	11	0	103.43	1.03652e+08	214310000
sp|P40763|STAT3_HUMAN	sp|P40763|STAT3_HUMAN	>sp|P40763|STAT3_HUMAN Signal transducer and activator of transcription 3 OS=Homo sapiens OX=9606 GN=STAT3 PE=1 SV=2	11	0	69.019	7.74054e+07	80302000
sp|P42025|ACTY_HUMAN	sp|P42025|ACTY_HUMAN	>sp|P42025|ACTY_HUMAN Beta-centractin OS=Homo sapiens OX=9606 GN=ACTR1B PE=1 SV=1	11	0	50.814	1.86783e+07	67601000
sp|P46777|RL5_HUMAN	sp|P46777|RL5_HUMAN	>sp|P46777|RL5_HUMAN 60S ribosomal protein L5 OS=Homo sapiens OX=9606 GN=RPL5 PE=1 SV=3	11	0	153.27	5.25829e+08	475280000
sp|P46977|STT3A_HUMAN	sp|P46977|STT3A_HUMAN	>sp|P46977|STT3A_HUMAN Dolichyl-diphosphooligosaccharide--protein glycosyltransferase subunit STT3A OS=Homo sapiens OX=9606 GN=STT3A PE=1 SV=2	11	0	121.62	2.17929e+08	267300000
sp|P49189|AL9A1_HUMAN	sp|P49189|AL9A1_HUMAN	>sp|P49189|AL9A1_HUMAN 4-trimethylaminobutyraldehyde dehydrogenase OS=Homo sapiens OX=9606 GN=ALDH9A1 PE=1 SV=3	11	0	127.05	4.56089e+08	444090000
sp|P49589|SYCC_HUMAN	sp|P49589|SYCC_HUMAN	>sp|P49589|SYCC_HUMAN Cysteine--tRNA ligase, cytoplasmic OS=Homo sapiens OX=9606 GN=CARS PE=1 SV=3	11	0	53.837	9.08885e+07	102280000
sp|P50995|ANX11_HUMAN;sp|P27216|ANX13_HUMAN	sp|P50995|ANX11_HUMAN	>sp|P50995|ANX11_HUMAN Annexin A11 OS=Homo sapiens OX=9606 GN=ANXA11 PE=1 SV=1	11	0	52.415	2.02092e+08	215400000
sp|P55209|NP1L1_HUMAN	sp|P55209|NP1L1_HUMAN	>sp|P55209|NP1L1_HUMAN Nucleosome assembly protein 1-like 1 OS=Homo sapiens OX=9606 GN=NAP1L1 PE=1 SV=1	11	0	323.31	9.10102e+08	812000000
sp|P56545|CTBP2_HUMAN	sp|P56545|CTBP2_HUMAN	>sp|P56545|CTBP2_HUMAN C-terminal-binding protein 2 OS=Homo sapiens OX=9606 GN=CTBP2 PE=1 SV=1	11	0	94.667	5.88201e+08	291640000
sp|P61011|SRP54_HUMAN	sp|P61011|SRP54_HUMAN	>sp|P61011|SRP54_HUMAN Signal recognition particle 54 kDa protein OS=Homo sapiens OX=9606 GN=SRP54 PE=1 SV=1	11	0	119.04	8.82858e+07	81267000
sp|P62333|PRS10_HUMAN	sp|P62333|PRS10_HUMAN	>sp|P62333|PRS10_HUMAN 26S proteasome regulatory subunit 10B OS=Homo sapiens OX=9606 GN=PSMC6 PE=1 SV=1	11	0	119.13	1.90008e+08	159970000
sp|P62701|RS4X_HUMAN;sp|P22090|RS4Y1_HUMAN;sp|Q8TD47|RS4Y2_HUMAN	sp|P62701|RS4X_HUMAN	>sp|P62701|RS4X_HUMAN 40S ribosomal protein S4, X isoform OS=Homo sapiens OX=9606 GN=RPS4X PE=1 SV=2	11	0	150.4	6.33106e+08	624480000
sp|P67809|YBOX1_HUMAN;sp|Q9Y2T7|YBOX2_HUMAN	sp|P67809|YBOX1_HUMAN	>sp|P67809|YBOX1_HUMAN Nuclease-sensitive element-binding protein 1 OS=Homo sapiens OX=9606 GN=YBX1 PE=1 SV=3	11	0	323.31	3.38231e+08	188700000
sp|Q00653|NFKB2_HUMAN	sp|Q00653|NFKB2_HUMAN	>sp|Q00653|NFKB2_HUMAN Nuclear factor NF-kappa-B p100 subunit OS=Homo sapiens OX=9606 GN=NFKB2 PE=1 SV=4	11	0	57.578	2.99201e+07	32647000
sp|Q01968|OCRL_HUMAN	sp|Q01968|OCRL_HUMAN	>sp|Q01968|OCRL_HUMAN Inositol polyphosphate 5-phosphatase OCRL OS=Homo sapiens OX=9606 GN=OCRL PE=1 SV=3	11	0	25.501	4.3798e+07	56010000
sp|Q02878|RL6_HUMAN	sp|Q02878|RL6_HUMAN	>sp|Q02878|RL6_HUMAN 60S ribosomal protein L6 OS=Homo sapiens OX=9606 GN=RPL6 PE=1 SV=3	11	0	248.52	1.03248e+09	765220000
sp|Q03518|TAP1_HUMAN	sp|Q03518|TAP1_HUMAN	>sp|Q03518|TAP1_HUMAN Antigen peptide transporter 1 OS=Homo sapiens OX=9606 GN=TAP1 PE=1 SV=2	11	0	250.28	1.30642e+08	163210000
sp|Q13310|PABP4_HUMAN	sp|Q13310|PABP4_HUMAN	>sp|Q13310|PABP4_HUMAN Polyadenylate-binding protein 4 OS=Homo sapiens OX=9606 GN=PABPC4 PE=1 SV=1	11	0	11.978	1.07435e+07	12680000
sp|Q13409|DC1I2_HUMAN	sp|Q13409|DC1I2_HUMAN	>sp|Q13409|DC1I2_HUMAN Cytoplasmic dynein 1 intermediate chain 2 OS=Homo sapiens OX=9606 GN=DYNC1I2 PE=1 SV=3	11	0	179.48	1.43863e+08	184250000
sp|Q14566|MCM6_HUMAN	sp|Q14566|MCM6_HUMAN	>sp|Q14566|MCM6_HUMAN DNA replication licensing factor MCM6 OS=Homo sapiens OX=9606 GN=MCM6 PE=1 SV=1	11	0	178.82	1.46548e+08	123790000
sp|Q14847|LASP1_HUMAN	sp|Q14847|LASP1_HUMAN	>sp|Q14847|LASP1_HUMAN LIM and SH3 domain protein 1 OS=Homo sapiens OX=9606 GN=LASP1 PE=1 SV=2	11	0	226.64	4.24806e+08	428810000
sp|Q15042|RB3GP_HUMAN	sp|Q15042|RB3GP_HUMAN	>sp|Q15042|RB3GP_HUMAN Rab3 GTPase-activating protein catalytic subunit OS=Homo sapiens OX=9606 GN=RAB3GAP1 PE=1 SV=3	11	0	61.325	5.25427e+07	41583000
sp|Q16822|PCKGM_HUMAN	sp|Q16822|PCKGM_HUMAN	>sp|Q16822|PCKGM_HUMAN Phosphoenolpyruvate carboxykinase [GTP], mitochondrial OS=Homo sapiens OX=9606 GN=PCK2 PE=1 SV=4	11	0	80.699	1.16458e+08	134550000
sp|Q3ZCM7|TBB8_HUMAN	sp|Q3ZCM7|TBB8_HUMAN	>sp|Q3ZCM7|TBB8_HUMAN Tubulin beta-8 chain OS=Homo sapiens OX=9606 GN=TUBB8 PE=1 SV=2	11	0	95.183	1.20589e+08	41776000
sp|Q68CZ2|TENS3_HUMAN	sp|Q68CZ2|TENS3_HUMAN	>sp|Q68CZ2|TENS3_HUMAN Tensin-3 OS=Homo sapiens OX=9606 GN=TNS3 PE=1 SV=2	11	0	66.992	5.24004e+07	70993000
sp|Q7Z3E5|ARMC9_HUMAN	sp|Q7Z3E5|ARMC9_HUMAN	>sp|Q7Z3E5|ARMC9_HUMAN LisH domain-containing protein ARMC9 OS=Homo sapiens OX=9606 GN=ARMC9 PE=1 SV=3	11	0	58.373	5.31831e+07	92854000
sp|Q8TC07|TBC15_HUMAN	sp|Q8TC07|TBC15_HUMAN	>sp|Q8TC07|TBC15_HUMAN TBC1 domain family member 15 OS=Homo sapiens OX=9606 GN=TBC1D15 PE=1 SV=2	11	0	68.571	6.62439e+07	96038000
sp|Q92888|ARHG1_HUMAN	sp|Q92888|ARHG1_HUMAN	>sp|Q92888|ARHG1_HUMAN Rho guanine nucleotide exchange factor 1 OS=Homo sapiens OX=9606 GN=ARHGEF1 PE=1 SV=2	11	0	40.53	5.32313e+08	290350000
sp|Q93009|UBP7_HUMAN	sp|Q93009|UBP7_HUMAN	>sp|Q93009|UBP7_HUMAN Ubiquitin carboxyl-terminal hydrolase 7 OS=Homo sapiens OX=9606 GN=USP7 PE=1 SV=2	11	0	60.754	5.53509e+07	33965000
sp|Q93052|LPP_HUMAN	sp|Q93052|LPP_HUMAN	>sp|Q93052|LPP_HUMAN Lipoma-preferred partner OS=Homo sapiens OX=9606 GN=LPP PE=1 SV=1	11	0	93.373	1.44769e+08	179330000
sp|Q969V3|NCLN_HUMAN	sp|Q969V3|NCLN_HUMAN	>sp|Q969V3|NCLN_HUMAN Nicalin OS=Homo sapiens OX=9606 GN=NCLN PE=1 SV=2	11	0	134.97	1.01126e+08	133970000
sp|Q96C92|ENTR1_HUMAN	sp|Q96C92|ENTR1_HUMAN	>sp|Q96C92|ENTR1_HUMAN Endosome-associated-trafficking regulator 1 OS=Homo sapiens OX=9606 GN=ENTR1 PE=1 SV=3	11	0	277.94	6.25245e+07	64787000
sp|Q96RP9|EFGM_HUMAN	sp|Q96RP9|EFGM_HUMAN	>sp|Q96RP9|EFGM_HUMAN Elongation factor G, mitochondrial OS=Homo sapiens OX=9606 GN=GFM1 PE=1 SV=2	11	0	71.219	7.40946e+07	76605000
sp|Q96SB4|SRPK1_HUMAN;sp|Q9UPE1|SRPK3_HUMAN	sp|Q96SB4|SRPK1_HUMAN	>sp|Q96SB4|SRPK1_HUMAN SRSF protein kinase 1 OS=Homo sapiens OX=9606 GN=SRPK1 PE=1 SV=2	11	0	49.799	1.32593e+08	669690000
sp|Q99459|CDC5L_HUMAN	sp|Q99459|CDC5L_HUMAN	>sp|Q99459|CDC5L_HUMAN Cell division cycle 5-like protein OS=Homo sapiens OX=9606 GN=CDC5L PE=1 SV=2	11	0	53.18	4.40172e+07	46112000
sp|Q9BT78|CSN4_HUMAN	sp|Q9BT78|CSN4_HUMAN	>sp|Q9BT78|CSN4_HUMAN COP9 signalosome complex subunit 4 OS=Homo sapiens OX=9606 GN=COPS4 PE=1 SV=1	11	0	85.034	8.9112e+07	108880000
sp|Q9BYX2|TBD2A_HUMAN	sp|Q9BYX2|TBD2A_HUMAN	>sp|Q9BYX2|TBD2A_HUMAN TBC1 domain family member 2A OS=Homo sapiens OX=9606 GN=TBC1D2 PE=1 SV=3	11	0	37.574	7.42197e+07	78336000
sp|Q9H845|ACAD9_HUMAN	sp|Q9H845|ACAD9_HUMAN	>sp|Q9H845|ACAD9_HUMAN Complex I assembly factor ACAD9, mitochondrial OS=Homo sapiens OX=9606 GN=ACAD9 PE=1 SV=1	11	0	38.931	6.37639e+07	72877000
sp|Q9NQW6|ANLN_HUMAN	sp|Q9NQW6|ANLN_HUMAN	>sp|Q9NQW6|ANLN_HUMAN Anillin OS=Homo sapiens OX=9606 GN=ANLN PE=1 SV=2	11	0	51.248	3.65131e+07	37002000
sp|Q9NQW7|XPP1_HUMAN	sp|Q9NQW7|XPP1_HUMAN	>sp|Q9NQW7|XPP1_HUMAN Xaa-Pro aminopeptidase 1 OS=Homo sapiens OX=9606 GN=XPNPEP1 PE=1 SV=3	11	0	49.384	8.27612e+07	106030000
sp|Q9NR30|DDX21_HUMAN	sp|Q9NR30|DDX21_HUMAN	>sp|Q9NR30|DDX21_HUMAN Nucleolar RNA helicase 2 OS=Homo sapiens OX=9606 GN=DDX21 PE=1 SV=5	11	0	75.431	7.79517e+07	44535000
sp|Q9UBQ7|GRHPR_HUMAN	sp|Q9UBQ7|GRHPR_HUMAN	>sp|Q9UBQ7|GRHPR_HUMAN Glyoxylate reductase/hydroxypyruvate reductase OS=Homo sapiens OX=9606 GN=GRHPR PE=1 SV=1	11	0	145.87	2.74172e+08	277080000
sp|Q9UH65|SWP70_HUMAN	sp|Q9UH65|SWP70_HUMAN	>sp|Q9UH65|SWP70_HUMAN Switch-associated protein 70 OS=Homo sapiens OX=9606 GN=SWAP70 PE=1 SV=1	11	0	70.726	8.25202e+07	92538000
sp|Q9UHD1|CHRD1_HUMAN	sp|Q9UHD1|CHRD1_HUMAN	>sp|Q9UHD1|CHRD1_HUMAN Cysteine and histidine-rich domain-containing protein 1 OS=Homo sapiens OX=9606 GN=CHORDC1 PE=1 SV=2	11	0	117.01	1.40546e+08	228780000
sp|Q9Y2S7|PDIP2_HUMAN	sp|Q9Y2S7|PDIP2_HUMAN	>sp|Q9Y2S7|PDIP2_HUMAN Polymerase delta-interacting protein 2 OS=Homo sapiens OX=9606 GN=POLDIP2 PE=1 SV=1	11	0	53.447	1.64508e+07	3367100
sp|Q9Y450|HBS1L_HUMAN	sp|Q9Y450|HBS1L_HUMAN	>sp|Q9Y450|HBS1L_HUMAN HBS1-like protein OS=Homo sapiens OX=9606 GN=HBS1L PE=1 SV=1	11	0	64.548	4.61196e+07	66873000
sp|Q9Y617|SERC_HUMAN	sp|Q9Y617|SERC_HUMAN	>sp|Q9Y617|SERC_HUMAN Phosphoserine aminotransferase OS=Homo sapiens OX=9606 GN=PSAT1 PE=1 SV=2	11	0	90.011	3.03207e+08	306100000
sp|Q9Y6E2|BZW2_HUMAN	sp|Q9Y6E2|BZW2_HUMAN	>sp|Q9Y6E2|BZW2_HUMAN Basic leucine zipper and W2 domain-containing protein 2 OS=Homo sapiens OX=9606 GN=BZW2 PE=1 SV=1	11	0	110.94	7.38134e+07	77402000
sp|Q9Y6Y8|S23IP_HUMAN	sp|Q9Y6Y8|S23IP_HUMAN	>sp|Q9Y6Y8|S23IP_HUMAN SEC23-interacting protein OS=Homo sapiens OX=9606 GN=SEC23IP PE=1 SV=1	11	0	86.041	1.23332e+08	89073000
sp|A0FGR8|ESYT2_HUMAN	sp|A0FGR8|ESYT2_HUMAN	>sp|A0FGR8|ESYT2_HUMAN Extended synaptotagmin-2 OS=Homo sapiens OX=9606 GN=ESYT2 PE=1 SV=1	10	0	41.018	2.21922e+08	62949000
sp|O00139|KIF2A_HUMAN;sp|Q8N4N8|KIF2B_HUMAN;sp|Q99661|KIF2C_HUMAN	sp|O00139|KIF2A_HUMAN	>sp|O00139|KIF2A_HUMAN Kinesin-like protein KIF2A OS=Homo sapiens OX=9606 GN=KIF2A PE=1 SV=3	10	0	33.153	9.97285e+07	76830000
sp|O15372|EIF3H_HUMAN	sp|O15372|EIF3H_HUMAN	>sp|O15372|EIF3H_HUMAN Eukaryotic translation initiation factor 3 subunit H OS=Homo sapiens OX=9606 GN=EIF3H PE=1 SV=1	10	0	53.407	9.26684e+07	31300000
sp|O60884|DNJA2_HUMAN	sp|O60884|DNJA2_HUMAN	>sp|O60884|DNJA2_HUMAN DnaJ homolog subfamily A member 2 OS=Homo sapiens OX=9606 GN=DNAJA2 PE=1 SV=1	10	0	162.91	9.12454e+07	64185000
sp|O75396|SC22B_HUMAN	sp|O75396|SC22B_HUMAN	>sp|O75396|SC22B_HUMAN Vesicle-trafficking protein SEC22b OS=Homo sapiens OX=9606 GN=SEC22B PE=1 SV=4	10	0	136.68	1.44333e+08	218380000
sp|O75477|ERLN1_HUMAN	sp|O75477|ERLN1_HUMAN	>sp|O75477|ERLN1_HUMAN Erlin-1 OS=Homo sapiens OX=9606 GN=ERLIN1 PE=1 SV=2	10	0	103.82	2.39194e+08	210480000
sp|O76003|GLRX3_HUMAN	sp|O76003|GLRX3_HUMAN	>sp|O76003|GLRX3_HUMAN Glutaredoxin-3 OS=Homo sapiens OX=9606 GN=GLRX3 PE=1 SV=2	10	0	47.496	1.42509e+08	151150000
sp|O76031|CLPX_HUMAN	sp|O76031|CLPX_HUMAN	>sp|O76031|CLPX_HUMAN ATP-dependent Clp protease ATP-binding subunit clpX-like, mitochondrial OS=Homo sapiens OX=9606 GN=CLPX PE=1 SV=2	10	0	35.185	7.41623e+07	83485000
sp|O94905|ERLN2_HUMAN	sp|O94905|ERLN2_HUMAN	>sp|O94905|ERLN2_HUMAN Erlin-2 OS=Homo sapiens OX=9606 GN=ERLIN2 PE=1 SV=1	10	0	59.247	1.46617e+08	124980000
sp|O94925|GLSK_HUMAN	sp|O94925|GLSK_HUMAN	>sp|O94925|GLSK_HUMAN Glutaminase kidney isoform, mitochondrial OS=Homo sapiens OX=9606 GN=GLS PE=1 SV=1	10	0	187.41	3.10379e+09	2110900000
sp|P05091|ALDH2_HUMAN	sp|P05091|ALDH2_HUMAN	>sp|P05091|ALDH2_HUMAN Aldehyde dehydrogenase, mitochondrial OS=Homo sapiens OX=9606 GN=ALDH2 PE=1 SV=2	10	0	65.604	5.94868e+07	71327000
sp|P07339|CATD_HUMAN	sp|P07339|CATD_HUMAN	>sp|P07339|CATD_HUMAN Cathepsin D OS=Homo sapiens OX=9606 GN=CTSD PE=1 SV=1	10	0	45.438	1.08539e+08	85586000
sp|P09104|ENOG_HUMAN	sp|P09104|ENOG_HUMAN	>sp|P09104|ENOG_HUMAN Gamma-enolase OS=Homo sapiens OX=9606 GN=ENO2 PE=1 SV=3	10	0	53.684	3.71695e+07	41341000
sp|P10321|1C07_HUMAN	sp|P10321|1C07_HUMAN	>sp|P10321|1C07_HUMAN HLA class I histocompatibility antigen, Cw-7 alpha chain OS=Homo sapiens OX=9606 GN=HLA-C PE=1 SV=3	10	0	17.024	9.69914e+06	22493000
sp|P11172|UMPS_HUMAN	sp|P11172|UMPS_HUMAN	>sp|P11172|UMPS_HUMAN Uridine 5-monophosphate synthase OS=Homo sapiens OX=9606 GN=UMPS PE=1 SV=1	10	0	72.891	1.33202e+08	138810000
sp|P11177|ODPB_HUMAN	sp|P11177|ODPB_HUMAN	>sp|P11177|ODPB_HUMAN Pyruvate dehydrogenase E1 component subunit beta, mitochondrial OS=Homo sapiens OX=9606 GN=PDHB PE=1 SV=3	10	0	138.96	3.08279e+08	284640000
sp|P11908|PRPS2_HUMAN	sp|P11908|PRPS2_HUMAN	>sp|P11908|PRPS2_HUMAN Ribose-phosphate pyrophosphokinase 2 OS=Homo sapiens OX=9606 GN=PRPS2 PE=1 SV=2	10	0	79.251	3.42443e+08	306120000
sp|P12236|ADT3_HUMAN	sp|P12236|ADT3_HUMAN	>sp|P12236|ADT3_HUMAN ADP/ATP translocase 3 OS=Homo sapiens OX=9606 GN=SLC25A6 PE=1 SV=4	10	0	116.37	1.11838e+09	1051600000
sp|P16152|CBR1_HUMAN	sp|P16152|CBR1_HUMAN	>sp|P16152|CBR1_HUMAN Carbonyl reductase [NADPH] 1 OS=Homo sapiens OX=9606 GN=CBR1 PE=1 SV=3	10	0	183.22	4.22201e+08	427660000
sp|P16435|NCPR_HUMAN	sp|P16435|NCPR_HUMAN	>sp|P16435|NCPR_HUMAN NADPH--cytochrome P450 reductase OS=Homo sapiens OX=9606 GN=POR PE=1 SV=2	10	0	96.571	6.64367e+07	86306000
sp|P17812|PYRG1_HUMAN	sp|P17812|PYRG1_HUMAN	>sp|P17812|PYRG1_HUMAN CTP synthase 1 OS=Homo sapiens OX=9606 GN=CTPS1 PE=1 SV=2	10	0	56.525	1.09307e+08	107950000
sp|P17980|PRS6A_HUMAN	sp|P17980|PRS6A_HUMAN	>sp|P17980|PRS6A_HUMAN 26S proteasome regulatory subunit 6A OS=Homo sapiens OX=9606 GN=PSMC3 PE=1 SV=3	10	0	221.69	1.6717e+08	166800000
sp|P18031|PTN1_HUMAN	sp|P18031|PTN1_HUMAN	>sp|P18031|PTN1_HUMAN Tyrosine-protein phosphatase non-receptor type 1 OS=Homo sapiens OX=9606 GN=PTPN1 PE=1 SV=1	10	0	102.47	1.55878e+08	262050000
sp|P22695|QCR2_HUMAN	sp|P22695|QCR2_HUMAN	>sp|P22695|QCR2_HUMAN Cytochrome b-c1 complex subunit 2, mitochondrial OS=Homo sapiens OX=9606 GN=UQCRC2 PE=1 SV=3	10	0	69.935	8.72357e+07	112840000
sp|P23284|PPIB_HUMAN	sp|P23284|PPIB_HUMAN	>sp|P23284|PPIB_HUMAN Peptidyl-prolyl cis-trans isomerase B OS=Homo sapiens OX=9606 GN=PPIB PE=1 SV=2	10	0	45.846	6.16925e+07	88033000
sp|P27635|RL10_HUMAN;sp|Q96L21|RL10L_HUMAN	sp|P27635|RL10_HUMAN	>sp|P27635|RL10_HUMAN 60S ribosomal protein L10 OS=Homo sapiens OX=9606 GN=RPL10 PE=1 SV=4	10	0	78.716	3.46e+08	265500000
sp|P30455|1A36_HUMAN;sp|P30443|1A01_HUMAN;sp|P04439|1A03_HUMAN	sp|P30455|1A36_HUMAN;sp|P30443|1A01_HUMAN;sp|P04439|1A03_HUMAN	>sp|P30455|1A36_HUMAN HLA class I histocompatibility antigen, A-36 alpha chain OS=Homo sapiens OX=9606 GN=HLA-A PE=1 SV=1;>sp|P30443|1A01_HUMAN HLA class I histocompatibility antigen, A-1 alpha chain OS=Homo sapiens OX=9606 GN=HLA-A PE=1 SV=1;>sp|P04439|1A	10	0	27.684	0	0
sp|P31937|3HIDH_HUMAN	sp|P31937|3HIDH_HUMAN	>sp|P31937|3HIDH_HUMAN 3-hydroxyisobutyrate dehydrogenase, mitochondrial OS=Homo sapiens OX=9606 GN=HIBADH PE=1 SV=2	10	0	160.06	1.68387e+08	142740000
sp|P32969|RL9_HUMAN	sp|P32969|RL9_HUMAN	>sp|P32969|RL9_HUMAN 60S ribosomal protein L9 OS=Homo sapiens OX=9606 GN=RPL9 PE=1 SV=1	10	0	320.88	6.74064e+08	487320000
sp|P33121|ACSL1_HUMAN;sp|Q9ULC5|ACSL5_HUMAN	sp|P33121|ACSL1_HUMAN	>sp|P33121|ACSL1_HUMAN Long-chain-fatty-acid--CoA ligase 1 OS=Homo sapiens OX=9606 GN=ACSL1 PE=1 SV=1	10	0	43.443	5.21525e+07	56530000
sp|P33993|MCM7_HUMAN	sp|P33993|MCM7_HUMAN	>sp|P33993|MCM7_HUMAN DNA replication licensing factor MCM7 OS=Homo sapiens OX=9606 GN=MCM7 PE=1 SV=4	10	0	79.106	1.49096e+08	116280000
sp|P35222|CTNB1_HUMAN	sp|P35222|CTNB1_HUMAN	>sp|P35222|CTNB1_HUMAN Catenin beta-1 OS=Homo sapiens OX=9606 GN=CTNNB1 PE=1 SV=1	10	0	76.185	5.2234e+07	24118000
sp|P35232|PHB_HUMAN	sp|P35232|PHB_HUMAN	>sp|P35232|PHB_HUMAN Prohibitin OS=Homo sapiens OX=9606 GN=PHB PE=1 SV=1	10	0	60.807	2.59334e+08	177420000
sp|P36507|MP2K2_HUMAN;sp|Q02750|MP2K1_HUMAN	sp|P36507|MP2K2_HUMAN	>sp|P36507|MP2K2_HUMAN Dual specificity mitogen-activated protein kinase kinase 2 OS=Homo sapiens OX=9606 GN=MAP2K2 PE=1 SV=1	10	0	177.09	1.52527e+08	169660000
sp|P40925|MDHC_HUMAN	sp|P40925|MDHC_HUMAN	>sp|P40925|MDHC_HUMAN Malate dehydrogenase, cytoplasmic OS=Homo sapiens OX=9606 GN=MDH1 PE=1 SV=4	10	0	60.309	9.9616e+07	112820000
sp|P42765|THIM_HUMAN	sp|P42765|THIM_HUMAN	>sp|P42765|THIM_HUMAN 3-ketoacyl-CoA thiolase, mitochondrial OS=Homo sapiens OX=9606 GN=ACAA2 PE=1 SV=2	10	0	114.91	6.65664e+07	94336000
sp|P46379|BAG6_HUMAN	sp|P46379|BAG6_HUMAN	>sp|P46379|BAG6_HUMAN Large proline-rich protein BAG6 OS=Homo sapiens OX=9606 GN=BAG6 PE=1 SV=2	10	0	49.987	5.08558e+07	59593000
sp|P49736|MCM2_HUMAN	sp|P49736|MCM2_HUMAN	>sp|P49736|MCM2_HUMAN DNA replication licensing factor MCM2 OS=Homo sapiens OX=9606 GN=MCM2 PE=1 SV=4	10	0	63.187	6.01433e+07	42295000
sp|P51149|RAB7A_HUMAN	sp|P51149|RAB7A_HUMAN	>sp|P51149|RAB7A_HUMAN Ras-related protein Rab-7a OS=Homo sapiens OX=9606 GN=RAB7A PE=1 SV=1	10	0	119.5	2.07738e+08	556500000
sp|P51648|AL3A2_HUMAN;sp|P30838|AL3A1_HUMAN	sp|P51648|AL3A2_HUMAN	>sp|P51648|AL3A2_HUMAN Aldehyde dehydrogenase family 3 member A2 OS=Homo sapiens OX=9606 GN=ALDH3A2 PE=1 SV=1	10	0	39.022	1.14742e+08	233540000
sp|P51665|PSMD7_HUMAN	sp|P51665|PSMD7_HUMAN	>sp|P51665|PSMD7_HUMAN 26S proteasome non-ATPase regulatory subunit 7 OS=Homo sapiens OX=9606 GN=PSMD7 PE=1 SV=2	10	0	109.38	2.21498e+08	187580000
sp|P52597|HNRPF_HUMAN	sp|P52597|HNRPF_HUMAN	>sp|P52597|HNRPF_HUMAN Heterogeneous nuclear ribonucleoprotein F OS=Homo sapiens OX=9606 GN=HNRNPF PE=1 SV=3	10	0	258.96	2.76272e+08	256510000
sp|P61313|RL15_HUMAN	sp|P61313|RL15_HUMAN	>sp|P61313|RL15_HUMAN 60S ribosomal protein L15 OS=Homo sapiens OX=9606 GN=RPL15 PE=1 SV=2	10	0	83.195	1.0446e+09	705580000
sp|P62249|RS16_HUMAN	sp|P62249|RS16_HUMAN	>sp|P62249|RS16_HUMAN 40S ribosomal protein S16 OS=Homo sapiens OX=9606 GN=RPS16 PE=1 SV=2	10	0	59.95	1.18352e+09	1164500000
sp|P62873|GBB1_HUMAN;sp|Q9HAV0|GBB4_HUMAN;sp|P16520|GBB3_HUMAN	sp|P62873|GBB1_HUMAN	>sp|P62873|GBB1_HUMAN Guanine nucleotide-binding protein G(I)/G(S)/G(T) subunit beta-1 OS=Homo sapiens OX=9606 GN=GNB1 PE=1 SV=3	10	0	157.84	5.38016e+08	865820000
sp|Q00325|MPCP_HUMAN	sp|Q00325|MPCP_HUMAN	>sp|Q00325|MPCP_HUMAN Phosphate carrier protein, mitochondrial OS=Homo sapiens OX=9606 GN=SLC25A3 PE=1 SV=2	10	0	155.2	9.61457e+08	936300000
sp|Q02880|TOP2B_HUMAN	sp|Q02880|TOP2B_HUMAN	>sp|Q02880|TOP2B_HUMAN DNA topoisomerase 2-beta OS=Homo sapiens OX=9606 GN=TOP2B PE=1 SV=3	10	0	17.111	3.01267e+07	15227000
sp|Q04917|1433F_HUMAN	sp|Q04917|1433F_HUMAN	>sp|Q04917|1433F_HUMAN 14-3-3 protein eta OS=Homo sapiens OX=9606 GN=YWHAH PE=1 SV=4	10	0	152.46	7.33039e+07	180430000
sp|Q06124|PTN11_HUMAN	sp|Q06124|PTN11_HUMAN	>sp|Q06124|PTN11_HUMAN Tyrosine-protein phosphatase non-receptor type 11 OS=Homo sapiens OX=9606 GN=PTPN11 PE=1 SV=2	10	0	49.116	4.45795e+07	54899000
sp|Q12904|AIMP1_HUMAN	sp|Q12904|AIMP1_HUMAN	>sp|Q12904|AIMP1_HUMAN Aminoacyl tRNA synthase complex-interacting multifunctional protein 1 OS=Homo sapiens OX=9606 GN=AIMP1 PE=1 SV=2	10	0	113.17	3.29372e+08	354360000
sp|Q12929|EPS8_HUMAN	sp|Q12929|EPS8_HUMAN	>sp|Q12929|EPS8_HUMAN Epidermal growth factor receptor kinase substrate 8 OS=Homo sapiens OX=9606 GN=EPS8 PE=1 SV=1	10	0	50.715	4.76012e+07	40209000
sp|Q13616|CUL1_HUMAN	sp|Q13616|CUL1_HUMAN	>sp|Q13616|CUL1_HUMAN Cullin-1 OS=Homo sapiens OX=9606 GN=CUL1 PE=1 SV=2	10	0	31.72	6.08272e+07	45326000
sp|Q14126|DSG2_HUMAN	sp|Q14126|DSG2_HUMAN	>sp|Q14126|DSG2_HUMAN Desmoglein-2 OS=Homo sapiens OX=9606 GN=DSG2 PE=1 SV=2	10	0	121.74	6.75453e+07	68940000
sp|Q15020|SART3_HUMAN	sp|Q15020|SART3_HUMAN	>sp|Q15020|SART3_HUMAN Squamous cell carcinoma antigen recognized by T-cells 3 OS=Homo sapiens OX=9606 GN=SART3 PE=1 SV=1	10	0	34.802	3.72234e+07	32546000
sp|Q15691|MARE1_HUMAN	sp|Q15691|MARE1_HUMAN	>sp|Q15691|MARE1_HUMAN Microtubule-associated protein RP/EB family member 1 OS=Homo sapiens OX=9606 GN=MAPRE1 PE=1 SV=3	10	0	54.678	1.24124e+08	161630000
sp|Q16352|AINX_HUMAN	sp|Q16352|AINX_HUMAN	>sp|Q16352|AINX_HUMAN Alpha-internexin OS=Homo sapiens OX=9606 GN=INA PE=1 SV=2	10	0	47.176	2.76215e+07	37031000
sp|Q29963|1C06_HUMAN;sp|Q29865|1C18_HUMAN;sp|P13747|HLAE_HUMAN	sp|Q29963|1C06_HUMAN;sp|Q29865|1C18_HUMAN	>sp|Q29963|1C06_HUMAN HLA class I histocompatibility antigen, Cw-6 alpha chain OS=Homo sapiens OX=9606 GN=HLA-C PE=1 SV=2;>sp|Q29865|1C18_HUMAN HLA class I histocompatibility antigen, Cw-18 alpha chain OS=Homo sapiens OX=9606 GN=HLA-C PE=1 SV=1	10	0	9.7287	2.07072e+07	34231000
sp|Q29RF7|PDS5A_HUMAN	sp|Q29RF7|PDS5A_HUMAN	>sp|Q29RF7|PDS5A_HUMAN Sister chromatid cohesion protein PDS5 homolog A OS=Homo sapiens OX=9606 GN=PDS5A PE=1 SV=1	10	0	58.179	5.15615e+07	43129000
sp|Q53GQ0|DHB12_HUMAN	sp|Q53GQ0|DHB12_HUMAN	>sp|Q53GQ0|DHB12_HUMAN Very-long-chain 3-oxoacyl-CoA reductase OS=Homo sapiens OX=9606 GN=HSD17B12 PE=1 SV=2	10	0	85.773	1.30677e+08	220380000
sp|Q6DD88|ATLA3_HUMAN	sp|Q6DD88|ATLA3_HUMAN	>sp|Q6DD88|ATLA3_HUMAN Atlastin-3 OS=Homo sapiens OX=9606 GN=ATL3 PE=1 SV=1	10	0	150.94	1.76409e+08	191260000
sp|Q6S8J3|POTEE_HUMAN;sp|Q9BYX7|ACTBM_HUMAN	sp|Q6S8J3|POTEE_HUMAN	>sp|Q6S8J3|POTEE_HUMAN POTE ankyrin domain family member E OS=Homo sapiens OX=9606 GN=POTEE PE=2 SV=3	10	0	7.3107	2.51852e+08	214730000
sp|Q7L2H7|EIF3M_HUMAN	sp|Q7L2H7|EIF3M_HUMAN	>sp|Q7L2H7|EIF3M_HUMAN Eukaryotic translation initiation factor 3 subunit M OS=Homo sapiens OX=9606 GN=EIF3M PE=1 SV=1	10	0	190.36	2.37243e+08	137440000
sp|Q7Z2W4|ZCCHV_HUMAN	sp|Q7Z2W4|ZCCHV_HUMAN	>sp|Q7Z2W4|ZCCHV_HUMAN Zinc finger CCCH-type antiviral protein 1 OS=Homo sapiens OX=9606 GN=ZC3HAV1 PE=1 SV=3	10	0	52.958	5.5095e+07	50064000
sp|Q86Y56|DAAF5_HUMAN	sp|Q86Y56|DAAF5_HUMAN	>sp|Q86Y56|DAAF5_HUMAN Dynein assembly factor 5, axonemal OS=Homo sapiens OX=9606 GN=DNAAF5 PE=1 SV=4	10	0	48.736	9.24607e+07	84645000
sp|Q8TCJ2|STT3B_HUMAN	sp|Q8TCJ2|STT3B_HUMAN	>sp|Q8TCJ2|STT3B_HUMAN Dolichyl-diphosphooligosaccharide--protein glycosyltransferase subunit STT3B OS=Homo sapiens OX=9606 GN=STT3B PE=1 SV=1	10	0	64.753	1.23011e+08	141300000
sp|Q8WWI1|LMO7_HUMAN	sp|Q8WWI1|LMO7_HUMAN	>sp|Q8WWI1|LMO7_HUMAN LIM domain only protein 7 OS=Homo sapiens OX=9606 GN=LMO7 PE=1 SV=3	10	0	26.431	1.0138e+07	33979000
sp|Q92552|RT27_HUMAN	sp|Q92552|RT27_HUMAN	>sp|Q92552|RT27_HUMAN 28S ribosomal protein S27, mitochondrial OS=Homo sapiens OX=9606 GN=MRPS27 PE=1 SV=3	10	0	121.87	6.0701e+07	85485000
sp|Q93050|VPP1_HUMAN	sp|Q93050|VPP1_HUMAN	>sp|Q93050|VPP1_HUMAN V-type proton ATPase 116 kDa subunit a isoform 1 OS=Homo sapiens OX=9606 GN=ATP6V0A1 PE=1 SV=3	10	0	61.764	2.1211e+07	29763000
sp|Q96AG4|LRC59_HUMAN	sp|Q96AG4|LRC59_HUMAN	>sp|Q96AG4|LRC59_HUMAN Leucine-rich repeat-containing protein 59 OS=Homo sapiens OX=9606 GN=LRRC59 PE=1 SV=1	10	0	183.4	4.17725e+08	408350000
sp|Q96CM8|ACSF2_HUMAN	sp|Q96CM8|ACSF2_HUMAN	>sp|Q96CM8|ACSF2_HUMAN Medium-chain acyl-CoA ligase ACSF2, mitochondrial OS=Homo sapiens OX=9606 GN=ACSF2 PE=1 SV=2	10	0	44.305	8.25007e+07	104540000
sp|Q96CW1|AP2M1_HUMAN	sp|Q96CW1|AP2M1_HUMAN	>sp|Q96CW1|AP2M1_HUMAN AP-2 complex subunit mu OS=Homo sapiens OX=9606 GN=AP2M1 PE=1 SV=2	10	0	50.065	8.75284e+07	171020000
sp|Q96HS1|PGAM5_HUMAN	sp|Q96HS1|PGAM5_HUMAN	>sp|Q96HS1|PGAM5_HUMAN Serine/threonine-protein phosphatase PGAM5, mitochondrial OS=Homo sapiens OX=9606 GN=PGAM5 PE=1 SV=2	10	0	37.02	3.7189e+08	219290000
sp|Q96K76|UBP47_HUMAN	sp|Q96K76|UBP47_HUMAN	>sp|Q96K76|UBP47_HUMAN Ubiquitin carboxyl-terminal hydrolase 47 OS=Homo sapiens OX=9606 GN=USP47 PE=1 SV=3	10	0	35.838	3.22842e+07	33102000
sp|Q99959|PKP2_HUMAN	sp|Q99959|PKP2_HUMAN	>sp|Q99959|PKP2_HUMAN Plakophilin-2 OS=Homo sapiens OX=9606 GN=PKP2 PE=1 SV=2	10	0	106.95	5.88924e+07	95708000
sp|Q9BXP5|SRRT_HUMAN	sp|Q9BXP5|SRRT_HUMAN	>sp|Q9BXP5|SRRT_HUMAN Serrate RNA effector molecule homolog OS=Homo sapiens OX=9606 GN=SRRT PE=1 SV=1	10	0	65.133	9.84168e+07	111040000
sp|Q9BZF9|UACA_HUMAN	sp|Q9BZF9|UACA_HUMAN	>sp|Q9BZF9|UACA_HUMAN Uveal autoantigen with coiled-coil domains and ankyrin repeats OS=Homo sapiens OX=9606 GN=UACA PE=1 SV=2	10	0	60.215	3.75585e+07	53637000
sp|Q9H9B4|SFXN1_HUMAN	sp|Q9H9B4|SFXN1_HUMAN	>sp|Q9H9B4|SFXN1_HUMAN Sideroflexin-1 OS=Homo sapiens OX=9606 GN=SFXN1 PE=1 SV=4	10	0	179.31	1.69913e+08	169510000
sp|Q9NQR4|NIT2_HUMAN	sp|Q9NQR4|NIT2_HUMAN	>sp|Q9NQR4|NIT2_HUMAN Omega-amidase NIT2 OS=Homo sapiens OX=9606 GN=NIT2 PE=1 SV=1	10	0	58.741	5.8112e+07	58337000
sp|Q9NVI7|ATD3A_HUMAN	sp|Q9NVI7|ATD3A_HUMAN	>sp|Q9NVI7|ATD3A_HUMAN ATPase family AAA domain-containing protein 3A OS=Homo sapiens OX=9606 GN=ATAD3A PE=1 SV=2	10	0	45.894	2.16345e+08	256270000
sp|Q9UBF2|COPG2_HUMAN	sp|Q9UBF2|COPG2_HUMAN	>sp|Q9UBF2|COPG2_HUMAN Coatomer subunit gamma-2 OS=Homo sapiens OX=9606 GN=COPG2 PE=1 SV=1	10	0	62.732	4.36282e+07	39781000
sp|Q9UGI8|TES_HUMAN	sp|Q9UGI8|TES_HUMAN	>sp|Q9UGI8|TES_HUMAN Testin OS=Homo sapiens OX=9606 GN=TES PE=1 SV=1	10	0	55.498	1.17457e+08	87354000
sp|Q9UJU6|DBNL_HUMAN	sp|Q9UJU6|DBNL_HUMAN	>sp|Q9UJU6|DBNL_HUMAN Drebrin-like protein OS=Homo sapiens OX=9606 GN=DBNL PE=1 SV=1	10	0	251.69	9.95184e+07	98664000
sp|Q9Y2W1|TR150_HUMAN	sp|Q9Y2W1|TR150_HUMAN	>sp|Q9Y2W1|TR150_HUMAN Thyroid hormone receptor-associated protein 3 OS=Homo sapiens OX=9606 GN=THRAP3 PE=1 SV=2	10	0	85.876	7.95732e+07	82731000
sp|O00429|DNM1L_HUMAN	sp|O00429|DNM1L_HUMAN	>sp|O00429|DNM1L_HUMAN Dynamin-1-like protein OS=Homo sapiens OX=9606 GN=DNM1L PE=1 SV=2	9	0	44.283	3.61895e+07	43703000
sp|O00622|CCN1_HUMAN	sp|O00622|CCN1_HUMAN	>sp|O00622|CCN1_HUMAN CCN family member 1 OS=Homo sapiens OX=9606 GN=CCN1 PE=1 SV=1	9	0	32.074	1.66792e+08	150480000
sp|O14787|TNPO2_HUMAN	sp|O14787|TNPO2_HUMAN	>sp|O14787|TNPO2_HUMAN Transportin-2 OS=Homo sapiens OX=9606 GN=TNPO2 PE=1 SV=3	9	0	17.961	3.11377e+07	46594000
sp|O15427|MOT4_HUMAN	sp|O15427|MOT4_HUMAN	>sp|O15427|MOT4_HUMAN Monocarboxylate transporter 4 OS=Homo sapiens OX=9606 GN=SLC16A3 PE=1 SV=1	9	0	44.628	1.90076e+08	185350000
sp|O43237|DC1L2_HUMAN	sp|O43237|DC1L2_HUMAN	>sp|O43237|DC1L2_HUMAN Cytoplasmic dynein 1 light intermediate chain 2 OS=Homo sapiens OX=9606 GN=DYNC1LI2 PE=1 SV=1	9	0	43.916	1.03762e+08	104820000
sp|O43837|IDH3B_HUMAN	sp|O43837|IDH3B_HUMAN	>sp|O43837|IDH3B_HUMAN Isocitrate dehydrogenase [NAD] subunit beta, mitochondrial OS=Homo sapiens OX=9606 GN=IDH3B PE=1 SV=2	9	0	43.085	1.35669e+08	116590000
sp|O60443|GSDME_HUMAN	sp|O60443|GSDME_HUMAN	>sp|O60443|GSDME_HUMAN Gasdermin-E OS=Homo sapiens OX=9606 GN=GSDME PE=1 SV=2	9	0	110.19	9.4228e+07	91208000
sp|O75122|CLAP2_HUMAN	sp|O75122|CLAP2_HUMAN	>sp|O75122|CLAP2_HUMAN CLIP-associating protein 2 OS=Homo sapiens OX=9606 GN=CLASP2 PE=1 SV=3	9	0	29.729	2.34328e+07	15270000
sp|O75436|VP26A_HUMAN	sp|O75436|VP26A_HUMAN	>sp|O75436|VP26A_HUMAN Vacuolar protein sorting-associated protein 26A OS=Homo sapiens OX=9606 GN=VPS26A PE=1 SV=2	9	0	51.889	1.80391e+08	165740000
sp|O75489|NDUS3_HUMAN	sp|O75489|NDUS3_HUMAN	>sp|O75489|NDUS3_HUMAN NADH dehydrogenase [ubiquinone] iron-sulfur protein 3, mitochondrial OS=Homo sapiens OX=9606 GN=NDUFS3 PE=1 SV=1	9	0	47.211	7.69165e+07	41229000
sp|O76021|RL1D1_HUMAN	sp|O76021|RL1D1_HUMAN	>sp|O76021|RL1D1_HUMAN Ribosomal L1 domain-containing protein 1 OS=Homo sapiens OX=9606 GN=RSL1D1 PE=1 SV=3	9	0	60.205	9.75331e+07	78311000
sp|O94906|PRP6_HUMAN	sp|O94906|PRP6_HUMAN	>sp|O94906|PRP6_HUMAN Pre-mRNA-processing factor 6 OS=Homo sapiens OX=9606 GN=PRPF6 PE=1 SV=1	9	0	49.321	3.37015e+07	39966000
sp|O95466|FMNL1_HUMAN	sp|O95466|FMNL1_HUMAN	>sp|O95466|FMNL1_HUMAN Formin-like protein 1 OS=Homo sapiens OX=9606 GN=FMNL1 PE=1 SV=3	9	0	28.652	1.83822e+07	9219800
sp|O95793|STAU1_HUMAN	sp|O95793|STAU1_HUMAN	>sp|O95793|STAU1_HUMAN Double-stranded RNA-binding protein Staufen homolog 1 OS=Homo sapiens OX=9606 GN=STAU1 PE=1 SV=2	9	0	31.189	6.78551e+07	48522000
sp|P00491|PNPH_HUMAN	sp|P00491|PNPH_HUMAN	>sp|P00491|PNPH_HUMAN Purine nucleoside phosphorylase OS=Homo sapiens OX=9606 GN=PNP PE=1 SV=2	9	0	40.497	2.73943e+07	31781000
sp|P05141|ADT2_HUMAN	sp|P05141|ADT2_HUMAN	>sp|P05141|ADT2_HUMAN ADP/ATP translocase 2 OS=Homo sapiens OX=9606 GN=SLC25A5 PE=1 SV=7	9	0	14.218	3.95404e+08	359360000
sp|P10319|1B58_HUMAN;sp|P18465|1B57_HUMAN;sp|P30511|HLAF_HUMAN	sp|P10319|1B58_HUMAN;sp|P18465|1B57_HUMAN	>sp|P10319|1B58_HUMAN HLA class I histocompatibility antigen, B-58 alpha chain OS=Homo sapiens OX=9606 GN=HLA-B PE=1 SV=1;>sp|P18465|1B57_HUMAN HLA class I histocompatibility antigen, B-57 alpha chain OS=Homo sapiens OX=9606 GN=HLA-B PE=1 SV=1	9	0	167.64	6.18796e+07	102180000
sp|P11182|ODB2_HUMAN	sp|P11182|ODB2_HUMAN	>sp|P11182|ODB2_HUMAN Lipoamide acyltransferase component of branched-chain alpha-keto acid dehydrogenase complex, mitochondrial OS=Homo sapiens OX=9606 GN=DBT PE=1 SV=3	9	0	77.068	7.77462e+06	7191200
sp|P11766|ADHX_HUMAN	sp|P11766|ADHX_HUMAN	>sp|P11766|ADHX_HUMAN Alcohol dehydrogenase class-3 OS=Homo sapiens OX=9606 GN=ADH5 PE=1 SV=4	9	0	103.79	3.3659e+08	309110000
sp|P13807|GYS1_HUMAN	sp|P13807|GYS1_HUMAN	>sp|P13807|GYS1_HUMAN Glycogen [starch] synthase, muscle OS=Homo sapiens OX=9606 GN=GYS1 PE=1 SV=2	9	0	50.748	9.08644e+07	99300000
sp|P15170|ERF3A_HUMAN	sp|P15170|ERF3A_HUMAN	>sp|P15170|ERF3A_HUMAN Eukaryotic peptide chain release factor GTP-binding subunit ERF3A OS=Homo sapiens OX=9606 GN=GSPT1 PE=1 SV=1	9	0	118.74	1.91396e+08	144720000
sp|P15559|NQO1_HUMAN	sp|P15559|NQO1_HUMAN	>sp|P15559|NQO1_HUMAN NAD(P)H dehydrogenase [quinone] 1 OS=Homo sapiens OX=9606 GN=NQO1 PE=1 SV=1	9	0	131.93	2.28728e+08	192360000
sp|P17252|KPCA_HUMAN;sp|P05771|KPCB_HUMAN;sp|P05129|KPCG_HUMAN	sp|P17252|KPCA_HUMAN	>sp|P17252|KPCA_HUMAN Protein kinase C alpha type OS=Homo sapiens OX=9606 GN=PRKCA PE=1 SV=4	9	0	42.756	3.24253e+07	28801000
sp|P18085|ARF4_HUMAN	sp|P18085|ARF4_HUMAN	>sp|P18085|ARF4_HUMAN ADP-ribosylation factor 4 OS=Homo sapiens OX=9606 GN=ARF4 PE=1 SV=3	9	0	207.16	7.08756e+08	671110000
sp|P18754|RCC1_HUMAN	sp|P18754|RCC1_HUMAN	>sp|P18754|RCC1_HUMAN Regulator of chromosome condensation OS=Homo sapiens OX=9606 GN=RCC1 PE=1 SV=1	9	0	182.43	9.04834e+07	83721000
sp|P19784|CSK22_HUMAN	sp|P19784|CSK22_HUMAN	>sp|P19784|CSK22_HUMAN Casein kinase II subunit alpha OS=Homo sapiens OX=9606 GN=CSNK2A2 PE=1 SV=1	9	0	47.006	8.69006e+07	72488000
sp|P21964|COMT_HUMAN	sp|P21964|COMT_HUMAN	>sp|P21964|COMT_HUMAN Catechol O-methyltransferase OS=Homo sapiens OX=9606 GN=COMT PE=1 SV=2	9	0	54.654	7.92507e+07	100130000
sp|P29692|EF1D_HUMAN	sp|P29692|EF1D_HUMAN	>sp|P29692|EF1D_HUMAN Elongation factor 1-delta OS=Homo sapiens OX=9606 GN=EEF1D PE=1 SV=5	9	0	229.15	7.31111e+08	661690000
sp|Q95365|1B38_HUMAN;sp|Q29836|1B67_HUMAN;sp|P30475|1B39_HUMAN;sp|Q29718|1B82_HUMAN;sp|Q31610|1B81_HUMAN;sp|P30486|1B48_HUMAN	sp|Q95365|1B38_HUMAN;sp|Q29836|1B67_HUMAN;sp|P30475|1B39_HUMAN;sp|Q29718|1B82_HUMAN;sp|Q31610|1B81_HUMAN;sp|P30486|1B48_HUMAN	>sp|Q95365|1B38_HUMAN HLA class I histocompatibility antigen, B-38 alpha chain OS=Homo sapiens OX=9606 GN=HLA-B PE=1 SV=1;>sp|Q29836|1B67_HUMAN HLA class I histocompatibility antigen, B-67 alpha chain OS=Homo sapiens OX=9606 GN=HLA-B PE=1 SV=1;>sp|P30475|1	9	0	6.768	0	12679000
sp|P31946|1433B_HUMAN	sp|P31946|1433B_HUMAN	>sp|P31946|1433B_HUMAN 14-3-3 protein beta/alpha OS=Homo sapiens OX=9606 GN=YWHAB PE=1 SV=3	9	0	125.65	1.00446e+08	99268000
sp|P32119|PRDX2_HUMAN	sp|P32119|PRDX2_HUMAN	>sp|P32119|PRDX2_HUMAN Peroxiredoxin-2 OS=Homo sapiens OX=9606 GN=PRDX2 PE=1 SV=5	9	0	72.607	2.63316e+08	205570000
sp|P35241|RADI_HUMAN	sp|P35241|RADI_HUMAN	>sp|P35241|RADI_HUMAN Radixin OS=Homo sapiens OX=9606 GN=RDX PE=1 SV=1	9	0	6.0614	9.24676e+06	4470400
sp|P35637|FUS_HUMAN	sp|P35637|FUS_HUMAN	>sp|P35637|FUS_HUMAN RNA-binding protein FUS OS=Homo sapiens OX=9606 GN=FUS PE=1 SV=1	9	0	160.82	5.66683e+08	387770000
sp|P39880|CUX1_HUMAN;sp|O14529|CUX2_HUMAN	sp|P39880|CUX1_HUMAN	>sp|P39880|CUX1_HUMAN Homeobox protein cut-like 1 OS=Homo sapiens OX=9606 GN=CUX1 PE=1 SV=3	9	0	107.16	473108	656680
sp|P41240|CSK_HUMAN	sp|P41240|CSK_HUMAN	>sp|P41240|CSK_HUMAN Tyrosine-protein kinase CSK OS=Homo sapiens OX=9606 GN=CSK PE=1 SV=1	9	0	52.47	7.21919e+07	62795000
sp|P42166|LAP2A_HUMAN	sp|P42166|LAP2A_HUMAN	>sp|P42166|LAP2A_HUMAN Lamina-associated polypeptide 2, isoform alpha OS=Homo sapiens OX=9606 GN=TMPO PE=1 SV=2	9	0	10.449	9.26122e+06	12941000
sp|P42167|LAP2B_HUMAN	sp|P42167|LAP2B_HUMAN	>sp|P42167|LAP2B_HUMAN Lamina-associated polypeptide 2, isoforms beta/gamma OS=Homo sapiens OX=9606 GN=TMPO PE=1 SV=2	9	0	119.94	4.33229e+07	66919000
sp|P43034|LIS1_HUMAN	sp|P43034|LIS1_HUMAN	>sp|P43034|LIS1_HUMAN Platelet-activating factor acetylhydrolase IB subunit alpha OS=Homo sapiens OX=9606 GN=PAFAH1B1 PE=1 SV=2	9	0	154.41	2.00347e+08	204830000
sp|P46781|RS9_HUMAN	sp|P46781|RS9_HUMAN	>sp|P46781|RS9_HUMAN 40S ribosomal protein S9 OS=Homo sapiens OX=9606 GN=RPS9 PE=1 SV=3	9	0	69.382	1.01227e+09	922530000
sp|P46782|RS5_HUMAN	sp|P46782|RS5_HUMAN	>sp|P46782|RS5_HUMAN 40S ribosomal protein S5 OS=Homo sapiens OX=9606 GN=RPS5 PE=1 SV=4	9	0	107.37	2.32767e+08	236240000
sp|P50402|EMD_HUMAN	sp|P50402|EMD_HUMAN	>sp|P50402|EMD_HUMAN Emerin OS=Homo sapiens OX=9606 GN=EMD PE=1 SV=1	9	0	147.82	1.69213e+08	199190000
sp|P52888|THOP1_HUMAN	sp|P52888|THOP1_HUMAN	>sp|P52888|THOP1_HUMAN Thimet oligopeptidase OS=Homo sapiens OX=9606 GN=THOP1 PE=1 SV=2	9	0	81.333	7.30009e+07	81204000
sp|P54920|SNAA_HUMAN;sp|Q9H115|SNAB_HUMAN	sp|P54920|SNAA_HUMAN	>sp|P54920|SNAA_HUMAN Alpha-soluble NSF attachment protein OS=Homo sapiens OX=9606 GN=NAPA PE=1 SV=3	9	0	106.14	3.369e+07	102540000
sp|P57740|NU107_HUMAN	sp|P57740|NU107_HUMAN	>sp|P57740|NU107_HUMAN Nuclear pore complex protein Nup107 OS=Homo sapiens OX=9606 GN=NUP107 PE=1 SV=1	9	0	121.56	5.34069e+07	56844000
sp|P60891|PRPS1_HUMAN	sp|P60891|PRPS1_HUMAN	>sp|P60891|PRPS1_HUMAN Ribose-phosphate pyrophosphokinase 1 OS=Homo sapiens OX=9606 GN=PRPS1 PE=1 SV=2	9	0	104.16	1.71256e+08	212990000
sp|P61201|CSN2_HUMAN	sp|P61201|CSN2_HUMAN	>sp|P61201|CSN2_HUMAN COP9 signalosome complex subunit 2 OS=Homo sapiens OX=9606 GN=COPS2 PE=1 SV=1	9	0	47.183	9.08484e+07	75541000
sp|P84077|ARF1_HUMAN;sp|P61204|ARF3_HUMAN	sp|P84077|ARF1_HUMAN;sp|P61204|ARF3_HUMAN	>sp|P84077|ARF1_HUMAN ADP-ribosylation factor 1 OS=Homo sapiens OX=9606 GN=ARF1 PE=1 SV=2;>sp|P61204|ARF3_HUMAN ADP-ribosylation factor 3 OS=Homo sapiens OX=9606 GN=ARF3 PE=1 SV=2	9	0	43.549	2.11651e+08	157750000
sp|P62269|RS18_HUMAN	sp|P62269|RS18_HUMAN	>sp|P62269|RS18_HUMAN 40S ribosomal protein S18 OS=Homo sapiens OX=9606 GN=RPS18 PE=1 SV=3	9	0	107.9	1.65461e+09	1469500000
sp|P62805|H4_HUMAN	sp|P62805|H4_HUMAN	>sp|P62805|H4_HUMAN Histone H4 OS=Homo sapiens OX=9606 GN=HIST1H4A PE=1 SV=2	9	0	94.531	2.43486e+09	2038800000
sp|P62826|RAN_HUMAN	sp|P62826|RAN_HUMAN	>sp|P62826|RAN_HUMAN GTP-binding nuclear protein Ran OS=Homo sapiens OX=9606 GN=RAN PE=1 SV=3	9	0	72.912	7.4121e+08	788210000
sp|P63092|GNAS2_HUMAN;sp|Q5JWF2|GNAS1_HUMAN	sp|P63092|GNAS2_HUMAN;sp|Q5JWF2|GNAS1_HUMAN	>sp|P63092|GNAS2_HUMAN Guanine nucleotide-binding protein G(s) subunit alpha isoforms short OS=Homo sapiens OX=9606 GN=GNAS PE=1 SV=1;>sp|Q5JWF2|GNAS1_HUMAN Guanine nucleotide-binding protein G(s) subunit alpha isoforms XLas OS=Homo sapiens OX=9606 GN=GNAS	9	0	85.977	1.86037e+08	239740000
sp|P68400|CSK21_HUMAN;sp|Q8NEV1|CSK23_HUMAN	sp|P68400|CSK21_HUMAN;sp|Q8NEV1|CSK23_HUMAN	>sp|P68400|CSK21_HUMAN Casein kinase II subunit alpha OS=Homo sapiens OX=9606 GN=CSNK2A1 PE=1 SV=1;>sp|Q8NEV1|CSK23_HUMAN Casein kinase II subunit alpha 3 OS=Homo sapiens OX=9606 GN=CSNK2A3 PE=1 SV=2	9	0	48.054	1.20922e+08	81236000
sp|Q00796|DHSO_HUMAN	sp|Q00796|DHSO_HUMAN	>sp|Q00796|DHSO_HUMAN Sorbitol dehydrogenase OS=Homo sapiens OX=9606 GN=SORD PE=1 SV=4	9	0	47.862	2.27637e+08	180000000
sp|Q01433|AMPD2_HUMAN	sp|Q01433|AMPD2_HUMAN	>sp|Q01433|AMPD2_HUMAN AMP deaminase 2 OS=Homo sapiens OX=9606 GN=AMPD2 PE=1 SV=2	9	0	19.993	5.90312e+07	58387000
sp|Q03519|TAP2_HUMAN;sp|Q9NUT2|ABCB8_HUMAN;sp|Q9NRK6|ABCBA_HUMAN	sp|Q03519|TAP2_HUMAN	>sp|Q03519|TAP2_HUMAN Antigen peptide transporter 2 OS=Homo sapiens OX=9606 GN=TAP2 PE=1 SV=1	9	0	30.352	3.82781e+07	92181000
sp|Q06830|PRDX1_HUMAN	sp|Q06830|PRDX1_HUMAN	>sp|Q06830|PRDX1_HUMAN Peroxiredoxin-1 OS=Homo sapiens OX=9606 GN=PRDX1 PE=1 SV=1	9	0	39.819	2.30231e+08	185900000
sp|Q07020|RL18_HUMAN	sp|Q07020|RL18_HUMAN	>sp|Q07020|RL18_HUMAN 60S ribosomal protein L18 OS=Homo sapiens OX=9606 GN=RPL18 PE=1 SV=2	9	0	87.519	8.32788e+08	557040000
sp|Q08AM6|VAC14_HUMAN	sp|Q08AM6|VAC14_HUMAN	>sp|Q08AM6|VAC14_HUMAN Protein VAC14 homolog OS=Homo sapiens OX=9606 GN=VAC14 PE=1 SV=1	9	0	165.72	8.5053e+07	103550000
sp|Q12768|WASC5_HUMAN	sp|Q12768|WASC5_HUMAN	>sp|Q12768|WASC5_HUMAN WASH complex subunit 5 OS=Homo sapiens OX=9606 GN=WASHC5 PE=1 SV=1	9	0	70.194	5.8003e+07	49737000
sp|Q13033|STRN3_HUMAN	sp|Q13033|STRN3_HUMAN	>sp|Q13033|STRN3_HUMAN Striatin-3 OS=Homo sapiens OX=9606 GN=STRN3 PE=1 SV=3	9	0	63.152	2.93165e+08	148780000
sp|Q13425|SNTB2_HUMAN	sp|Q13425|SNTB2_HUMAN	>sp|Q13425|SNTB2_HUMAN Beta-2-syntrophin OS=Homo sapiens OX=9606 GN=SNTB2 PE=1 SV=1	9	0	26.992	9.0822e+07	98225000
sp|Q13564|ULA1_HUMAN	sp|Q13564|ULA1_HUMAN	>sp|Q13564|ULA1_HUMAN NEDD8-activating enzyme E1 regulatory subunit OS=Homo sapiens OX=9606 GN=NAE1 PE=1 SV=1	9	0	94.287	7.79379e+07	100390000
sp|Q13671|RIN1_HUMAN	sp|Q13671|RIN1_HUMAN	>sp|Q13671|RIN1_HUMAN Ras and Rab interactor 1 OS=Homo sapiens OX=9606 GN=RIN1 PE=1 SV=4	9	0	33.129	2.25824e+07	19898000
sp|Q14318|FKBP8_HUMAN	sp|Q14318|FKBP8_HUMAN	>sp|Q14318|FKBP8_HUMAN Peptidyl-prolyl cis-trans isomerase FKBP8 OS=Homo sapiens OX=9606 GN=FKBP8 PE=1 SV=2	9	0	174.96	9.82331e+07	111650000
sp|Q14739|LBR_HUMAN	sp|Q14739|LBR_HUMAN	>sp|Q14739|LBR_HUMAN Delta(14)-sterol reductase LBR OS=Homo sapiens OX=9606 GN=LBR PE=1 SV=2	9	0	62.764	1.54547e+08	297480000
sp|Q15717|ELAV1_HUMAN;sp|Q12926|ELAV2_HUMAN;sp|P26378|ELAV4_HUMAN	sp|Q15717|ELAV1_HUMAN	>sp|Q15717|ELAV1_HUMAN ELAV-like protein 1 OS=Homo sapiens OX=9606 GN=ELAVL1 PE=1 SV=2	9	0	95.673	2.19524e+08	248880000
sp|Q15813|TBCE_HUMAN	sp|Q15813|TBCE_HUMAN	>sp|Q15813|TBCE_HUMAN Tubulin-specific chaperone E OS=Homo sapiens OX=9606 GN=TBCE PE=1 SV=1	9	0	77.733	4.52314e+07	33410000
sp|Q16401|PSMD5_HUMAN	sp|Q16401|PSMD5_HUMAN	>sp|Q16401|PSMD5_HUMAN 26S proteasome non-ATPase regulatory subunit 5 OS=Homo sapiens OX=9606 GN=PSMD5 PE=1 SV=3	9	0	66.502	7.49346e+07	105560000
sp|Q5SW79|CE170_HUMAN;sp|Q96L14|C170L_HUMAN	sp|Q5SW79|CE170_HUMAN	>sp|Q5SW79|CE170_HUMAN Centrosomal protein of 170 kDa OS=Homo sapiens OX=9606 GN=CEP170 PE=1 SV=1	9	0	29.58	3.12181e+07	28214000
sp|Q6PKG0|LARP1_HUMAN;sp|Q659C4|LAR1B_HUMAN	sp|Q6PKG0|LARP1_HUMAN	>sp|Q6PKG0|LARP1_HUMAN La-related protein 1 OS=Homo sapiens OX=9606 GN=LARP1 PE=1 SV=2	9	0	37.39	2.69272e+07	25553000
sp|Q6Y7W6|GGYF2_HUMAN	sp|Q6Y7W6|GGYF2_HUMAN	>sp|Q6Y7W6|GGYF2_HUMAN GRB10-interacting GYF protein 2 OS=Homo sapiens OX=9606 GN=GIGYF2 PE=1 SV=1	9	0	130.73	3.99547e+07	85178000
sp|Q709F0|ACD11_HUMAN	sp|Q709F0|ACD11_HUMAN	>sp|Q709F0|ACD11_HUMAN Acyl-CoA dehydrogenase family member 11 OS=Homo sapiens OX=9606 GN=ACAD11 PE=1 SV=3	9	0	184.33	8.38629e+07	76827000
sp|Q7L0Y3|TM10C_HUMAN	sp|Q7L0Y3|TM10C_HUMAN	>sp|Q7L0Y3|TM10C_HUMAN tRNA methyltransferase 10 homolog C OS=Homo sapiens OX=9606 GN=TRMT10C PE=1 SV=2	9	0	42.355	5.68049e+07	72511000
sp|Q7Z406|MYH14_HUMAN	sp|Q7Z406|MYH14_HUMAN	>sp|Q7Z406|MYH14_HUMAN Myosin-14 OS=Homo sapiens OX=9606 GN=MYH14 PE=1 SV=2	9	0.00038153	5.3951	2.11766e+08	258410000
sp|Q86UU1|PHLB1_HUMAN	sp|Q86UU1|PHLB1_HUMAN	>sp|Q86UU1|PHLB1_HUMAN Pleckstrin homology-like domain family B member 1 OS=Homo sapiens OX=9606 GN=PHLDB1 PE=1 SV=1	9	0	39.262	1.76776e+07	41091000
sp|Q86X55|CARM1_HUMAN	sp|Q86X55|CARM1_HUMAN	>sp|Q86X55|CARM1_HUMAN Histone-arginine methyltransferase CARM1 OS=Homo sapiens OX=9606 GN=CARM1 PE=1 SV=3	9	0	45.227	1.08427e+08	125630000
sp|Q8IZ83|A16A1_HUMAN	sp|Q8IZ83|A16A1_HUMAN	>sp|Q8IZ83|A16A1_HUMAN Aldehyde dehydrogenase family 16 member A1 OS=Homo sapiens OX=9606 GN=ALDH16A1 PE=1 SV=2	9	0	49.719	5.68244e+07	50906000
sp|Q8TD19|NEK9_HUMAN	sp|Q8TD19|NEK9_HUMAN	>sp|Q8TD19|NEK9_HUMAN Serine/threonine-protein kinase Nek9 OS=Homo sapiens OX=9606 GN=NEK9 PE=1 SV=2	9	0	20.963	3.80015e+07	42210000
sp|Q92598|HS105_HUMAN	sp|Q92598|HS105_HUMAN	>sp|Q92598|HS105_HUMAN Heat shock protein 105 kDa OS=Homo sapiens OX=9606 GN=HSPH1 PE=1 SV=1	9	0	30.165	9.7276e+07	57543000
sp|Q92769|HDAC2_HUMAN	sp|Q92769|HDAC2_HUMAN	>sp|Q92769|HDAC2_HUMAN Histone deacetylase 2 OS=Homo sapiens OX=9606 GN=HDAC2 PE=1 SV=2	9	0	38.502	8.12602e+07	141700000
sp|Q969Z0|FAKD4_HUMAN	sp|Q969Z0|FAKD4_HUMAN	>sp|Q969Z0|FAKD4_HUMAN FAST kinase domain-containing protein 4 OS=Homo sapiens OX=9606 GN=TBRG4 PE=1 SV=1	9	0	45.59	6.36434e+07	44038000
sp|Q96A33|CCD47_HUMAN	sp|Q96A33|CCD47_HUMAN	>sp|Q96A33|CCD47_HUMAN Coiled-coil domain-containing protein 47 OS=Homo sapiens OX=9606 GN=CCDC47 PE=1 SV=1	9	0	95.801	7.49415e+07	84088000
sp|Q96AE4|FUBP1_HUMAN	sp|Q96AE4|FUBP1_HUMAN	>sp|Q96AE4|FUBP1_HUMAN Far upstream element-binding protein 1 OS=Homo sapiens OX=9606 GN=FUBP1 PE=1 SV=3	9	0	30.743	3.82815e+07	46664000
sp|Q96C36|P5CR2_HUMAN	sp|Q96C36|P5CR2_HUMAN	>sp|Q96C36|P5CR2_HUMAN Pyrroline-5-carboxylate reductase 2 OS=Homo sapiens OX=9606 GN=PYCR2 PE=1 SV=1	9	0	56.253	8.84855e+07	92912000
sp|Q96CS3|FAF2_HUMAN	sp|Q96CS3|FAF2_HUMAN	>sp|Q96CS3|FAF2_HUMAN FAS-associated factor 2 OS=Homo sapiens OX=9606 GN=FAF2 PE=1 SV=2	9	0	80.296	1.35646e+08	139620000
sp|Q96CW5|GCP3_HUMAN	sp|Q96CW5|GCP3_HUMAN	>sp|Q96CW5|GCP3_HUMAN Gamma-tubulin complex component 3 OS=Homo sapiens OX=9606 GN=TUBGCP3 PE=1 SV=2	9	0	69.182	3.06121e+07	48711000
sp|Q96KP1|EXOC2_HUMAN	sp|Q96KP1|EXOC2_HUMAN	>sp|Q96KP1|EXOC2_HUMAN Exocyst complex component 2 OS=Homo sapiens OX=9606 GN=EXOC2 PE=1 SV=1	9	0	35.163	3.48456e+07	53505000
sp|Q96RT1|ERBIN_HUMAN	sp|Q96RT1|ERBIN_HUMAN	>sp|Q96RT1|ERBIN_HUMAN Erbin OS=Homo sapiens OX=9606 GN=ERBIN PE=1 SV=2	9	0	59.051	4.16337e+07	46609000
sp|Q99439|CNN2_HUMAN	sp|Q99439|CNN2_HUMAN	>sp|Q99439|CNN2_HUMAN Calponin-2 OS=Homo sapiens OX=9606 GN=CNN2 PE=1 SV=4	9	0	83.973	2.56603e+08	369110000
sp|Q99536|VAT1_HUMAN	sp|Q99536|VAT1_HUMAN	>sp|Q99536|VAT1_HUMAN Synaptic vesicle membrane protein VAT-1 homolog OS=Homo sapiens OX=9606 GN=VAT1 PE=1 SV=2	9	0	62.86	3.4965e+07	36681000
sp|Q99567|NUP88_HUMAN	sp|Q99567|NUP88_HUMAN	>sp|Q99567|NUP88_HUMAN Nuclear pore complex protein Nup88 OS=Homo sapiens OX=9606 GN=NUP88 PE=1 SV=2	9	0	120.18	7.18568e+07	74878000
sp|Q99623|PHB2_HUMAN	sp|Q99623|PHB2_HUMAN	>sp|Q99623|PHB2_HUMAN Prohibitin-2 OS=Homo sapiens OX=9606 GN=PHB2 PE=1 SV=2	9	0	55.962	2.72485e+08	123750000
sp|Q99700|ATX2_HUMAN	sp|Q99700|ATX2_HUMAN	>sp|Q99700|ATX2_HUMAN Ataxin-2 OS=Homo sapiens OX=9606 GN=ATXN2 PE=1 SV=2	9	0	47.582	6.39292e+07	41977000
sp|Q99829|CPNE1_HUMAN	sp|Q99829|CPNE1_HUMAN	>sp|Q99829|CPNE1_HUMAN Copine-1 OS=Homo sapiens OX=9606 GN=CPNE1 PE=1 SV=1	9	0	178.98	3.10069e+08	242720000
sp|Q9BR76|COR1B_HUMAN	sp|Q9BR76|COR1B_HUMAN	>sp|Q9BR76|COR1B_HUMAN Coronin-1B OS=Homo sapiens OX=9606 GN=CORO1B PE=1 SV=1	9	0	127.34	1.31056e+08	109740000
sp|Q9BS26|ERP44_HUMAN	sp|Q9BS26|ERP44_HUMAN	>sp|Q9BS26|ERP44_HUMAN Endoplasmic reticulum resident protein 44 OS=Homo sapiens OX=9606 GN=ERP44 PE=1 SV=1	9	0	78.708	6.58491e+07	115520000
sp|Q9BWD1|THIC_HUMAN	sp|Q9BWD1|THIC_HUMAN	>sp|Q9BWD1|THIC_HUMAN Acetyl-CoA acetyltransferase, cytosolic OS=Homo sapiens OX=9606 GN=ACAT2 PE=1 SV=2	9	0	57.14	8.19682e+07	102680000
sp|Q9BWM7|SFXN3_HUMAN	sp|Q9BWM7|SFXN3_HUMAN	>sp|Q9BWM7|SFXN3_HUMAN Sideroflexin-3 OS=Homo sapiens OX=9606 GN=SFXN3 PE=1 SV=3	9	0	78.74	9.67424e+07	117680000
sp|Q9BXW7|HDHD5_HUMAN	sp|Q9BXW7|HDHD5_HUMAN	>sp|Q9BXW7|HDHD5_HUMAN Haloacid dehalogenase-like hydrolase domain-containing 5 OS=Homo sapiens OX=9606 GN=HDHD5 PE=1 SV=1	9	0	137.64	1.24331e+08	107850000
sp|Q9H0B6|KLC2_HUMAN	sp|Q9H0B6|KLC2_HUMAN	>sp|Q9H0B6|KLC2_HUMAN Kinesin light chain 2 OS=Homo sapiens OX=9606 GN=KLC2 PE=1 SV=1	9	0	16.337	1.23309e+07	15908000
sp|Q9H4G0|E41L1_HUMAN	sp|Q9H4G0|E41L1_HUMAN	>sp|Q9H4G0|E41L1_HUMAN Band 4.1-like protein 1 OS=Homo sapiens OX=9606 GN=EPB41L1 PE=1 SV=2	9	0	115.8	8.40465e+07	65809000
sp|Q9H6R4|NOL6_HUMAN	sp|Q9H6R4|NOL6_HUMAN	>sp|Q9H6R4|NOL6_HUMAN Nucleolar protein 6 OS=Homo sapiens OX=9606 GN=NOL6 PE=1 SV=2	9	0	46.099	4.43167e+07	39880000
sp|Q9NPQ8|RIC8A_HUMAN;sp|Q9NVN3|RIC8B_HUMAN	sp|Q9NPQ8|RIC8A_HUMAN	>sp|Q9NPQ8|RIC8A_HUMAN Synembryn-A OS=Homo sapiens OX=9606 GN=RIC8A PE=1 SV=3	9	0	156.49	8.05693e+07	84818000
sp|Q9NR45|SIAS_HUMAN	sp|Q9NR45|SIAS_HUMAN	>sp|Q9NR45|SIAS_HUMAN Sialic acid synthase OS=Homo sapiens OX=9606 GN=NANS PE=1 SV=2	9	0	235.51	1.14636e+08	161700000
sp|Q9NTJ3|SMC4_HUMAN	sp|Q9NTJ3|SMC4_HUMAN	>sp|Q9NTJ3|SMC4_HUMAN Structural maintenance of chromosomes protein 4 OS=Homo sapiens OX=9606 GN=SMC4 PE=1 SV=2	9	0	38.087	3.55089e+07	68033000
sp|Q9NVE7|PANK4_HUMAN	sp|Q9NVE7|PANK4_HUMAN	>sp|Q9NVE7|PANK4_HUMAN Pantothenate kinase 4 OS=Homo sapiens OX=9606 GN=PANK4 PE=1 SV=1	9	0	42.494	2.19168e+07	28551000
sp|Q9P035|HACD3_HUMAN	sp|Q9P035|HACD3_HUMAN	>sp|Q9P035|HACD3_HUMAN Very-long-chain (3R)-3-hydroxyacyl-CoA dehydratase 3 OS=Homo sapiens OX=9606 GN=HACD3 PE=1 SV=2	9	0	115.2	4.46943e+08	421340000
sp|Q9UH99|SUN2_HUMAN	sp|Q9UH99|SUN2_HUMAN	>sp|Q9UH99|SUN2_HUMAN SUN domain-containing protein 2 OS=Homo sapiens OX=9606 GN=SUN2 PE=1 SV=3	9	0	83.607	3.26078e+07	48704000
sp|Q9ULA0|DNPEP_HUMAN	sp|Q9ULA0|DNPEP_HUMAN	>sp|Q9ULA0|DNPEP_HUMAN Aspartyl aminopeptidase OS=Homo sapiens OX=9606 GN=DNPEP PE=1 SV=1	9	0	72.054	1.26626e+08	137570000
sp|Q9UMS4|PRP19_HUMAN	sp|Q9UMS4|PRP19_HUMAN	>sp|Q9UMS4|PRP19_HUMAN Pre-mRNA-processing factor 19 OS=Homo sapiens OX=9606 GN=PRPF19 PE=1 SV=1	9	0	75.214	1.57577e+08	194700000
sp|Q9UP95|S12A4_HUMAN;sp|Q9UHW9|S12A6_HUMAN	sp|Q9UP95|S12A4_HUMAN	>sp|Q9UP95|S12A4_HUMAN Solute carrier family 12 member 4 OS=Homo sapiens OX=9606 GN=SLC12A4 PE=1 SV=2	9	0	30.583	2.23001e+07	45251000
sp|Q9Y2R9|RT07_HUMAN	sp|Q9Y2R9|RT07_HUMAN	>sp|Q9Y2R9|RT07_HUMAN 28S ribosomal protein S7, mitochondrial OS=Homo sapiens OX=9606 GN=MRPS7 PE=1 SV=2	9	0	57.534	8.84751e+07	98802000
sp|Q9Y2T2|AP3M1_HUMAN;sp|P53677|AP3M2_HUMAN	sp|Q9Y2T2|AP3M1_HUMAN	>sp|Q9Y2T2|AP3M1_HUMAN AP-3 complex subunit mu-1 OS=Homo sapiens OX=9606 GN=AP3M1 PE=1 SV=1	9	0	88.586	5.97278e+07	53508000
sp|Q9Y2X3|NOP58_HUMAN	sp|Q9Y2X3|NOP58_HUMAN	>sp|Q9Y2X3|NOP58_HUMAN Nucleolar protein 58 OS=Homo sapiens OX=9606 GN=NOP58 PE=1 SV=1	9	0	55.718	5.403e+07	56230000
sp|Q9Y305|ACOT9_HUMAN	sp|Q9Y305|ACOT9_HUMAN	>sp|Q9Y305|ACOT9_HUMAN Acyl-coenzyme A thioesterase 9, mitochondrial OS=Homo sapiens OX=9606 GN=ACOT9 PE=1 SV=2	9	0	35.313	3.43797e+07	30805000
sp|Q9Y3A5|SBDS_HUMAN	sp|Q9Y3A5|SBDS_HUMAN	>sp|Q9Y3A5|SBDS_HUMAN Ribosome maturation protein SBDS OS=Homo sapiens OX=9606 GN=SBDS PE=1 SV=4	9	0	46.855	5.89888e+07	64309000
sp|A2RRP1|NBAS_HUMAN	sp|A2RRP1|NBAS_HUMAN	>sp|A2RRP1|NBAS_HUMAN Neuroblastoma-amplified sequence OS=Homo sapiens OX=9606 GN=NBAS PE=1 SV=2	8	0	30.377	1.74745e+07	19275000
sp|A5A3E0|POTEF_HUMAN	sp|A5A3E0|POTEF_HUMAN	>sp|A5A3E0|POTEF_HUMAN POTE ankyrin domain family member F OS=Homo sapiens OX=9606 GN=POTEF PE=1 SV=2	8	0.00074543	4.8934	0	0
sp|A8MXV4|NUD19_HUMAN	sp|A8MXV4|NUD19_HUMAN	>sp|A8MXV4|NUD19_HUMAN Nucleoside diphosphate-linked moiety X motif 19 OS=Homo sapiens OX=9606 GN=NUDT19 PE=1 SV=1	8	0	105.88	6.78482e+07	85959000
sp|O00629|IMA3_HUMAN	sp|O00629|IMA3_HUMAN	>sp|O00629|IMA3_HUMAN Importin subunit alpha-3 OS=Homo sapiens OX=9606 GN=KPNA4 PE=1 SV=1	8	0	127.96	9.06338e+07	83843000
sp|O14818|PSA7_HUMAN;sp|Q8TAA3|PSMA8_HUMAN	sp|O14818|PSA7_HUMAN	>sp|O14818|PSA7_HUMAN Proteasome subunit alpha type-7 OS=Homo sapiens OX=9606 GN=PSMA7 PE=1 SV=1	8	0	103.75	4.87637e+07	60651000
sp|P19105|ML12A_HUMAN;sp|O14950|ML12B_HUMAN;sp|P24844|MYL9_HUMAN	sp|P19105|ML12A_HUMAN;sp|O14950|ML12B_HUMAN;sp|P24844|MYL9_HUMAN	>sp|P19105|ML12A_HUMAN Myosin regulatory light chain 12A OS=Homo sapiens OX=9606 GN=MYL12A PE=1 SV=2;>sp|O14950|ML12B_HUMAN Myosin regulatory light chain 12B OS=Homo sapiens OX=9606 GN=MYL12B PE=1 SV=2;>sp|P24844|MYL9_HUMAN Myosin regulatory light polypept	8	0	183.93	5.01156e+08	599020000
sp|O15027|SC16A_HUMAN	sp|O15027|SC16A_HUMAN	>sp|O15027|SC16A_HUMAN Protein transport protein Sec16A OS=Homo sapiens OX=9606 GN=SEC16A PE=1 SV=4	8	0	53.82	3.54068e+07	35217000
sp|O15143|ARC1B_HUMAN	sp|O15143|ARC1B_HUMAN	>sp|O15143|ARC1B_HUMAN Actin-related protein 2/3 complex subunit 1B OS=Homo sapiens OX=9606 GN=ARPC1B PE=1 SV=3	8	0	87.407	2.70098e+08	272980000
sp|O15357|SHIP2_HUMAN	sp|O15357|SHIP2_HUMAN	>sp|O15357|SHIP2_HUMAN Phosphatidylinositol 3,4,5-trisphosphate 5-phosphatase 2 OS=Homo sapiens OX=9606 GN=INPPL1 PE=1 SV=2	8	0	27.542	2.57544e+07	34699000
sp|O43396|TXNL1_HUMAN	sp|O43396|TXNL1_HUMAN	>sp|O43396|TXNL1_HUMAN Thioredoxin-like protein 1 OS=Homo sapiens OX=9606 GN=TXNL1 PE=1 SV=3	8	0	97.855	1.5076e+08	137800000
sp|O43684|BUB3_HUMAN	sp|O43684|BUB3_HUMAN	>sp|O43684|BUB3_HUMAN Mitotic checkpoint protein BUB3 OS=Homo sapiens OX=9606 GN=BUB3 PE=1 SV=1	8	0	41.369	1.10819e+08	125960000
sp|O43865|SAHH2_HUMAN;sp|Q96HN2|SAHH3_HUMAN	sp|O43865|SAHH2_HUMAN;sp|Q96HN2|SAHH3_HUMAN	>sp|O43865|SAHH2_HUMAN S-adenosylhomocysteine hydrolase-like protein 1 OS=Homo sapiens OX=9606 GN=AHCYL1 PE=1 SV=2;>sp|Q96HN2|SAHH3_HUMAN Adenosylhomocysteinase 3 OS=Homo sapiens OX=9606 GN=AHCYL2 PE=1 SV=1	8	0	21.896	4.59773e+07	34287000
sp|O60256|KPRB_HUMAN	sp|O60256|KPRB_HUMAN	>sp|O60256|KPRB_HUMAN Phosphoribosyl pyrophosphate synthase-associated protein 2 OS=Homo sapiens OX=9606 GN=PRPSAP2 PE=1 SV=1	8	0	36.938	1.70453e+08	74031000
sp|O60437|PEPL_HUMAN	sp|O60437|PEPL_HUMAN	>sp|O60437|PEPL_HUMAN Periplakin OS=Homo sapiens OX=9606 GN=PPL PE=1 SV=4	8	0	22.471	1.2635e+06	8697000
sp|O75439|MPPB_HUMAN	sp|O75439|MPPB_HUMAN	>sp|O75439|MPPB_HUMAN Mitochondrial-processing peptidase subunit beta OS=Homo sapiens OX=9606 GN=PMPCB PE=1 SV=2	8	0	77.09	1.40076e+08	130460000
sp|O75962|TRIO_HUMAN	sp|O75962|TRIO_HUMAN	>sp|O75962|TRIO_HUMAN Triple functional domain protein OS=Homo sapiens OX=9606 GN=TRIO PE=1 SV=2	8	0	35.628	2.02516e+07	15120000
sp|P00367|DHE3_HUMAN;sp|P49448|DHE4_HUMAN	sp|P00367|DHE3_HUMAN;sp|P49448|DHE4_HUMAN	>sp|P00367|DHE3_HUMAN Glutamate dehydrogenase 1, mitochondrial OS=Homo sapiens OX=9606 GN=GLUD1 PE=1 SV=2;>sp|P49448|DHE4_HUMAN Glutamate dehydrogenase 2, mitochondrial OS=Homo sapiens OX=9606 GN=GLUD2 PE=1 SV=2	8	0	38.295	3.39631e+07	46401000
sp|P04632|CPNS1_HUMAN;sp|Q96L46|CPNS2_HUMAN	sp|P04632|CPNS1_HUMAN	>sp|P04632|CPNS1_HUMAN Calpain small subunit 1 OS=Homo sapiens OX=9606 GN=CAPNS1 PE=1 SV=1	8	0	323.31	1.94896e+08	241670000
sp|P06493|CDK1_HUMAN	sp|P06493|CDK1_HUMAN	>sp|P06493|CDK1_HUMAN Cyclin-dependent kinase 1 OS=Homo sapiens OX=9606 GN=CDK1 PE=1 SV=3	8	0	55.21	1.13652e+08	135430000
sp|P06748|NPM_HUMAN	sp|P06748|NPM_HUMAN	>sp|P06748|NPM_HUMAN Nucleophosmin OS=Homo sapiens OX=9606 GN=NPM1 PE=1 SV=2	8	0	263.89	1.37758e+09	1136500000
sp|P07737|PROF1_HUMAN;CON__P02584	sp|P07737|PROF1_HUMAN	>sp|P07737|PROF1_HUMAN Profilin-1 OS=Homo sapiens OX=9606 GN=PFN1 PE=1 SV=2	8	0	221.54	3.62664e+09	3906800000
sp|P08134|RHOC_HUMAN;sp|P62745|RHOB_HUMAN	sp|P08134|RHOC_HUMAN	>sp|P08134|RHOC_HUMAN Rho-related GTP-binding protein RhoC OS=Homo sapiens OX=9606 GN=RHOC PE=1 SV=1	8	0	44.483	3.7173e+08	355110000
sp|P08865|RSSA_HUMAN	sp|P08865|RSSA_HUMAN	>sp|P08865|RSSA_HUMAN 40S ribosomal protein SA OS=Homo sapiens OX=9606 GN=RPSA PE=1 SV=4	8	0	126.33	1.80207e+08	115480000
sp|P09211|GSTP1_HUMAN	sp|P09211|GSTP1_HUMAN	>sp|P09211|GSTP1_HUMAN Glutathione S-transferase P OS=Homo sapiens OX=9606 GN=GSTP1 PE=1 SV=2	8	0	238.04	4.58339e+08	554040000
sp|P12270|TPR_HUMAN	sp|P12270|TPR_HUMAN	>sp|P12270|TPR_HUMAN Nucleoprotein TPR OS=Homo sapiens OX=9606 GN=TPR PE=1 SV=3	8	0	36.897	1.91178e+07	21844000
sp|P21359|NF1_HUMAN	sp|P21359|NF1_HUMAN	>sp|P21359|NF1_HUMAN Neurofibromin OS=Homo sapiens OX=9606 GN=NF1 PE=1 SV=2	8	0	42.07	1.65874e+07	35926000
sp|P22392|NDKB_HUMAN;sp|O60361|NDK8_HUMAN	sp|P22392|NDKB_HUMAN;sp|O60361|NDK8_HUMAN	>sp|P22392|NDKB_HUMAN Nucleoside diphosphate kinase B OS=Homo sapiens OX=9606 GN=NME2 PE=1 SV=1;>sp|O60361|NDK8_HUMAN Putative nucleoside diphosphate kinase OS=Homo sapiens OX=9606 GN=NME2P1 PE=5 SV=1	8	0	37.818	1.57806e+08	165360000
sp|P25786|PSA1_HUMAN	sp|P25786|PSA1_HUMAN	>sp|P25786|PSA1_HUMAN Proteasome subunit alpha type-1 OS=Homo sapiens OX=9606 GN=PSMA1 PE=1 SV=1	8	0	24.978	6.91094e+07	62352000
sp|P27144|KAD4_HUMAN	sp|P27144|KAD4_HUMAN	>sp|P27144|KAD4_HUMAN Adenylate kinase 4, mitochondrial OS=Homo sapiens OX=9606 GN=AK4 PE=1 SV=1	8	0	49.97	1.58827e+08	154810000
sp|P30044|PRDX5_HUMAN	sp|P30044|PRDX5_HUMAN	>sp|P30044|PRDX5_HUMAN Peroxiredoxin-5, mitochondrial OS=Homo sapiens OX=9606 GN=PRDX5 PE=1 SV=4	8	0	74.796	6.56758e+07	82028000
sp|P30520|PURA2_HUMAN	sp|P30520|PURA2_HUMAN	>sp|P30520|PURA2_HUMAN Adenylosuccinate synthetase isozyme 2 OS=Homo sapiens OX=9606 GN=ADSS PE=1 SV=3	8	0	55.555	1.15793e+08	87134000
sp|P32322|P5CR1_HUMAN	sp|P32322|P5CR1_HUMAN	>sp|P32322|P5CR1_HUMAN Pyrroline-5-carboxylate reductase 1, mitochondrial OS=Homo sapiens OX=9606 GN=PYCR1 PE=1 SV=2	8	0	90.671	1.68203e+08	131960000
sp|P35270|SPRE_HUMAN	sp|P35270|SPRE_HUMAN	>sp|P35270|SPRE_HUMAN Sepiapterin reductase OS=Homo sapiens OX=9606 GN=SPR PE=1 SV=1	8	0	66.79	9.07336e+07	91154000
sp|P35610|SOAT1_HUMAN	sp|P35610|SOAT1_HUMAN	>sp|P35610|SOAT1_HUMAN Sterol O-acyltransferase 1 OS=Homo sapiens OX=9606 GN=SOAT1 PE=1 SV=3	8	0	129.49	1.94678e+08	117320000
sp|P38159|RBMX_HUMAN;sp|Q96E39|RMXL1_HUMAN;sp|O75526|RMXL2_HUMAN;sp|Q8N7X1|RMXL3_HUMAN	sp|P38159|RBMX_HUMAN;sp|Q96E39|RMXL1_HUMAN	>sp|P38159|RBMX_HUMAN RNA-binding motif protein, X chromosome OS=Homo sapiens OX=9606 GN=RBMX PE=1 SV=3;>sp|Q96E39|RMXL1_HUMAN RNA binding motif protein, X-linked-like-1 OS=Homo sapiens OX=9606 GN=RBMXL1 PE=1 SV=1	8	0	73.756	2.13981e+08	191120000
sp|P40616|ARL1_HUMAN	sp|P40616|ARL1_HUMAN	>sp|P40616|ARL1_HUMAN ADP-ribosylation factor-like protein 1 OS=Homo sapiens OX=9606 GN=ARL1 PE=1 SV=1	8	0	59.346	1.38285e+08	107830000
sp|P45880|VDAC2_HUMAN	sp|P45880|VDAC2_HUMAN	>sp|P45880|VDAC2_HUMAN Voltage-dependent anion-selective channel protein 2 OS=Homo sapiens OX=9606 GN=VDAC2 PE=1 SV=2	8	0	179.1	2.49579e+08	239740000
sp|P46063|RECQ1_HUMAN	sp|P46063|RECQ1_HUMAN	>sp|P46063|RECQ1_HUMAN ATP-dependent DNA helicase Q1 OS=Homo sapiens OX=9606 GN=RECQL PE=1 SV=3	8	0	47.315	7.98222e+07	90432000
sp|P48163|MAOX_HUMAN	sp|P48163|MAOX_HUMAN	>sp|P48163|MAOX_HUMAN NADP-dependent malic enzyme OS=Homo sapiens OX=9606 GN=ME1 PE=1 SV=1	8	0	123.14	8.34946e+07	94496000
sp|P50213|IDH3A_HUMAN	sp|P50213|IDH3A_HUMAN	>sp|P50213|IDH3A_HUMAN Isocitrate dehydrogenase [NAD] subunit alpha, mitochondrial OS=Homo sapiens OX=9606 GN=IDH3A PE=1 SV=1	8	0	121.28	2.52276e+08	250550000
sp|P50542|PEX5_HUMAN	sp|P50542|PEX5_HUMAN	>sp|P50542|PEX5_HUMAN Peroxisomal targeting signal 1 receptor OS=Homo sapiens OX=9606 GN=PEX5 PE=1 SV=3	8	0	53.216	9.83812e+06	18755000
sp|P51398|RT29_HUMAN	sp|P51398|RT29_HUMAN	>sp|P51398|RT29_HUMAN 28S ribosomal protein S29, mitochondrial OS=Homo sapiens OX=9606 GN=DAP3 PE=1 SV=1	8	0	43.499	7.40429e+07	47882000
sp|P52292|IMA1_HUMAN	sp|P52292|IMA1_HUMAN	>sp|P52292|IMA1_HUMAN Importin subunit alpha-1 OS=Homo sapiens OX=9606 GN=KPNA2 PE=1 SV=1	8	0	211.75	1.0256e+08	93913000
sp|P52907|CAZA1_HUMAN	sp|P52907|CAZA1_HUMAN	>sp|P52907|CAZA1_HUMAN F-actin-capping protein subunit alpha-1 OS=Homo sapiens OX=9606 GN=CAPZA1 PE=1 SV=3	8	0	102.06	8.79989e+07	142350000
sp|P53004|BIEA_HUMAN	sp|P53004|BIEA_HUMAN	>sp|P53004|BIEA_HUMAN Biliverdin reductase A OS=Homo sapiens OX=9606 GN=BLVRA PE=1 SV=2	8	0	78.445	5.43617e+07	44565000
sp|P53007|TXTP_HUMAN	sp|P53007|TXTP_HUMAN	>sp|P53007|TXTP_HUMAN Tricarboxylate transport protein, mitochondrial OS=Homo sapiens OX=9606 GN=SLC25A1 PE=1 SV=2	8	0	83.134	1.31044e+08	142430000
sp|P55735|SEC13_HUMAN	sp|P55735|SEC13_HUMAN	>sp|P55735|SEC13_HUMAN Protein SEC13 homolog OS=Homo sapiens OX=9606 GN=SEC13 PE=1 SV=3	8	0	78.816	1.04022e+08	121490000
sp|P55795|HNRH2_HUMAN	sp|P55795|HNRH2_HUMAN	>sp|P55795|HNRH2_HUMAN Heterogeneous nuclear ribonucleoprotein H2 OS=Homo sapiens OX=9606 GN=HNRNPH2 PE=1 SV=1	8	0	27.739	5.17153e+07	32402000
sp|P57678|GEMI4_HUMAN	sp|P57678|GEMI4_HUMAN	>sp|P57678|GEMI4_HUMAN Gem-associated protein 4 OS=Homo sapiens OX=9606 GN=GEMIN4 PE=1 SV=2	8	0	92.451	4.90907e+07	31966000
sp|P61160|ARP2_HUMAN	sp|P61160|ARP2_HUMAN	>sp|P61160|ARP2_HUMAN Actin-related protein 2 OS=Homo sapiens OX=9606 GN=ACTR2 PE=1 SV=1	8	0	137.45	3.51096e+08	341490000
sp|P61586|RHOA_HUMAN	sp|P61586|RHOA_HUMAN	>sp|P61586|RHOA_HUMAN Transforming protein RhoA OS=Homo sapiens OX=9606 GN=RHOA PE=1 SV=1	8	0	34.257	7.39018e+07	83032000
sp|P61981|1433G_HUMAN	sp|P61981|1433G_HUMAN	>sp|P61981|1433G_HUMAN 14-3-3 protein gamma OS=Homo sapiens OX=9606 GN=YWHAG PE=1 SV=2	8	0	156.75	2.79991e+07	27568000
sp|P62280|RS11_HUMAN	sp|P62280|RS11_HUMAN	>sp|P62280|RS11_HUMAN 40S ribosomal protein S11 OS=Homo sapiens OX=9606 GN=RPS11 PE=1 SV=3	8	0	58.158	4.07615e+08	439720000
sp|P62714|PP2AB_HUMAN;sp|P67775|PP2AA_HUMAN	sp|P62714|PP2AB_HUMAN;sp|P67775|PP2AA_HUMAN	>sp|P62714|PP2AB_HUMAN Serine/threonine-protein phosphatase 2A catalytic subunit beta isoform OS=Homo sapiens OX=9606 GN=PPP2CB PE=1 SV=1;>sp|P67775|PP2AA_HUMAN Serine/threonine-protein phosphatase 2A catalytic subunit alpha isoform OS=Homo sapiens OX=9606	8	0	126.05	2.64292e+08	224350000
sp|P62879|GBB2_HUMAN	sp|P62879|GBB2_HUMAN	>sp|P62879|GBB2_HUMAN Guanine nucleotide-binding protein G(I)/G(S)/G(T) subunit beta-2 OS=Homo sapiens OX=9606 GN=GNB2 PE=1 SV=3	8	0	42.202	5.30075e+07	58533000
sp|P62906|RL10A_HUMAN	sp|P62906|RL10A_HUMAN	>sp|P62906|RL10A_HUMAN 60S ribosomal protein L10a OS=Homo sapiens OX=9606 GN=RPL10A PE=1 SV=2	8	0	75.288	1.1593e+09	1007100000
sp|P67936|TPM4_HUMAN	sp|P67936|TPM4_HUMAN	>sp|P67936|TPM4_HUMAN Tropomyosin alpha-4 chain OS=Homo sapiens OX=9606 GN=TPM4 PE=1 SV=3	8	0	51.584	2.19409e+07	25648000
sp|P78395|PRAME_HUMAN	sp|P78395|PRAME_HUMAN	>sp|P78395|PRAME_HUMAN Melanoma antigen preferentially expressed in tumors OS=Homo sapiens OX=9606 GN=PRAME PE=1 SV=1	8	0	32.906	1.56865e+08	0
sp|P84085|ARF5_HUMAN	sp|P84085|ARF5_HUMAN	>sp|P84085|ARF5_HUMAN ADP-ribosylation factor 5 OS=Homo sapiens OX=9606 GN=ARF5 PE=1 SV=2	8	0	8.9192	1.84935e+07	24630000
sp|Q04721|NOTC2_HUMAN	sp|Q04721|NOTC2_HUMAN	>sp|Q04721|NOTC2_HUMAN Neurogenic locus notch homolog protein 2 OS=Homo sapiens OX=9606 GN=NOTCH2 PE=1 SV=3	8	0	28.943	1.01768e+07	22359000
sp|Q04760|LGUL_HUMAN	sp|Q04760|LGUL_HUMAN	>sp|Q04760|LGUL_HUMAN Lactoylglutathione lyase OS=Homo sapiens OX=9606 GN=GLO1 PE=1 SV=4	8	0	70.594	8.82341e+07	118720000
sp|Q05193|DYN1_HUMAN	sp|Q05193|DYN1_HUMAN	>sp|Q05193|DYN1_HUMAN Dynamin-1 OS=Homo sapiens OX=9606 GN=DNM1 PE=1 SV=2	8	0	15.378	1.017e+08	63662000
sp|Q13148|TADBP_HUMAN	sp|Q13148|TADBP_HUMAN	>sp|Q13148|TADBP_HUMAN TAR DNA-binding protein 43 OS=Homo sapiens OX=9606 GN=TARDBP PE=1 SV=1	8	0	217.69	7.72183e+07	122570000
sp|Q13228|SBP1_HUMAN	sp|Q13228|SBP1_HUMAN	>sp|Q13228|SBP1_HUMAN Methanethiol oxidase OS=Homo sapiens OX=9606 GN=SELENBP1 PE=1 SV=2	8	0	26.136	1.71646e+07	17929000
sp|Q13492|PICAL_HUMAN;sp|O60641|AP180_HUMAN	sp|Q13492|PICAL_HUMAN	>sp|Q13492|PICAL_HUMAN Phosphatidylinositol-binding clathrin assembly protein OS=Homo sapiens OX=9606 GN=PICALM PE=1 SV=2	8	0	25.555	1.31365e+07	23348000
sp|Q14155|ARHG7_HUMAN	sp|Q14155|ARHG7_HUMAN	>sp|Q14155|ARHG7_HUMAN Rho guanine nucleotide exchange factor 7 OS=Homo sapiens OX=9606 GN=ARHGEF7 PE=1 SV=2	8	0	63.904	2.00038e+07	24529000
sp|Q15019|SEPT2_HUMAN	sp|Q15019|SEPT2_HUMAN	>sp|Q15019|SEPT2_HUMAN Septin-2 OS=Homo sapiens OX=9606 GN=SEPTIN2 PE=1 SV=1	8	0	89.114	3.80497e+07	59979000
sp|Q15417|CNN3_HUMAN	sp|Q15417|CNN3_HUMAN	>sp|Q15417|CNN3_HUMAN Calponin-3 OS=Homo sapiens OX=9606 GN=CNN3 PE=1 SV=1	8	0	72.875	6.62094e+07	85994000
sp|Q15437|SC23B_HUMAN	sp|Q15437|SC23B_HUMAN	>sp|Q15437|SC23B_HUMAN Protein transport protein Sec23B OS=Homo sapiens OX=9606 GN=SEC23B PE=1 SV=2	8	0	40.308	5.34539e+07	35993000
sp|Q15645|PCH2_HUMAN	sp|Q15645|PCH2_HUMAN	>sp|Q15645|PCH2_HUMAN Pachytene checkpoint protein 2 homolog OS=Homo sapiens OX=9606 GN=TRIP13 PE=1 SV=2	8	0	31.728	1.10943e+08	83527000
sp|Q16658|FSCN1_HUMAN	sp|Q16658|FSCN1_HUMAN	>sp|Q16658|FSCN1_HUMAN Fascin OS=Homo sapiens OX=9606 GN=FSCN1 PE=1 SV=3	8	0	70.271	9.02906e+07	93294000
sp|Q16836|HCDH_HUMAN	sp|Q16836|HCDH_HUMAN	>sp|Q16836|HCDH_HUMAN Hydroxyacyl-coenzyme A dehydrogenase, mitochondrial OS=Homo sapiens OX=9606 GN=HADH PE=1 SV=3	8	0	103.84	9.22943e+07	58059000
sp|Q1KMD3|HNRL2_HUMAN	sp|Q1KMD3|HNRL2_HUMAN	>sp|Q1KMD3|HNRL2_HUMAN Heterogeneous nuclear ribonucleoprotein U-like protein 2 OS=Homo sapiens OX=9606 GN=HNRNPUL2 PE=1 SV=1	8	0	37.534	4.21329e+07	40786000
sp|Q32MZ4|LRRF1_HUMAN	sp|Q32MZ4|LRRF1_HUMAN	>sp|Q32MZ4|LRRF1_HUMAN Leucine-rich repeat flightless-interacting protein 1 OS=Homo sapiens OX=9606 GN=LRRFIP1 PE=1 SV=2	8	0	43.063	2.13809e+07	20533000
sp|Q5JRA6|TGO1_HUMAN	sp|Q5JRA6|TGO1_HUMAN	>sp|Q5JRA6|TGO1_HUMAN Transport and Golgi organization protein 1 homolog OS=Homo sapiens OX=9606 GN=MIA3 PE=1 SV=1	8	0	48.2	1.44127e+06	1315600
sp|Q5SRE5|NU188_HUMAN	sp|Q5SRE5|NU188_HUMAN	>sp|Q5SRE5|NU188_HUMAN Nucleoporin NUP188 homolog OS=Homo sapiens OX=9606 GN=NUP188 PE=1 SV=1	8	0	27.827	2.96309e+07	19731000
sp|Q5T9A4|ATD3B_HUMAN	sp|Q5T9A4|ATD3B_HUMAN	>sp|Q5T9A4|ATD3B_HUMAN ATPase family AAA domain-containing protein 3B OS=Homo sapiens OX=9606 GN=ATAD3B PE=1 SV=1	8	0.00072202	4.4129	2.35889e+07	26521000
sp|Q63ZY3|KANK2_HUMAN	sp|Q63ZY3|KANK2_HUMAN	>sp|Q63ZY3|KANK2_HUMAN KN motif and ankyrin repeat domain-containing protein 2 OS=Homo sapiens OX=9606 GN=KANK2 PE=1 SV=1	8	0	65.628	3.5844e+07	47765000
sp|Q6NYC8|PPR18_HUMAN	sp|Q6NYC8|PPR18_HUMAN	>sp|Q6NYC8|PPR18_HUMAN Phostensin OS=Homo sapiens OX=9606 GN=PPP1R18 PE=1 SV=1	8	0	131.36	6.7761e+07	72526000
sp|Q6NZI2|CAVN1_HUMAN	sp|Q6NZI2|CAVN1_HUMAN	>sp|Q6NZI2|CAVN1_HUMAN Caveolae-associated protein 1 OS=Homo sapiens OX=9606 GN=CAVIN1 PE=1 SV=1	8	0	220.8	1.92704e+08	293770000
sp|Q7Z417|NUFP2_HUMAN	sp|Q7Z417|NUFP2_HUMAN	>sp|Q7Z417|NUFP2_HUMAN Nuclear fragile X mental retardation-interacting protein 2 OS=Homo sapiens OX=9606 GN=NUFIP2 PE=1 SV=1	8	0	45.688	3.4421e+07	53235000
sp|Q7Z434|MAVS_HUMAN	sp|Q7Z434|MAVS_HUMAN	>sp|Q7Z434|MAVS_HUMAN Mitochondrial antiviral-signaling protein OS=Homo sapiens OX=9606 GN=MAVS PE=1 SV=2	8	0	114.39	3.89471e+07	42026000
sp|Q8NBS9|TXND5_HUMAN	sp|Q8NBS9|TXND5_HUMAN	>sp|Q8NBS9|TXND5_HUMAN Thioredoxin domain-containing protein 5 OS=Homo sapiens OX=9606 GN=TXNDC5 PE=1 SV=2	8	0	53.562	5.4605e+07	81657000
sp|Q8ND76|CCNY_HUMAN;sp|Q8N7R7|CCYL1_HUMAN;sp|Q5T2Q4|CCYL2_HUMAN	sp|Q8ND76|CCNY_HUMAN	>sp|Q8ND76|CCNY_HUMAN Cyclin-Y OS=Homo sapiens OX=9606 GN=CCNY PE=1 SV=2	8	0	80.772	2.27442e+08	234710000
sp|Q8TC12|RDH11_HUMAN;sp|Q96NR8|RDH12_HUMAN	sp|Q8TC12|RDH11_HUMAN	>sp|Q8TC12|RDH11_HUMAN Retinol dehydrogenase 11 OS=Homo sapiens OX=9606 GN=RDH11 PE=1 SV=2	8	0	85.295	9.93807e+07	97986000
sp|Q92609|TBCD5_HUMAN	sp|Q92609|TBCD5_HUMAN	>sp|Q92609|TBCD5_HUMAN TBC1 domain family member 5 OS=Homo sapiens OX=9606 GN=TBC1D5 PE=1 SV=1	8	0	75.606	7.52697e+07	65040000
sp|Q93034|CUL5_HUMAN	sp|Q93034|CUL5_HUMAN	>sp|Q93034|CUL5_HUMAN Cullin-5 OS=Homo sapiens OX=9606 GN=CUL5 PE=1 SV=4	8	0	34.585	3.96885e+07	42566000
sp|Q96C19|EFHD2_HUMAN;sp|Q9BUP0|EFHD1_HUMAN	sp|Q96C19|EFHD2_HUMAN	>sp|Q96C19|EFHD2_HUMAN EF-hand domain-containing protein D2 OS=Homo sapiens OX=9606 GN=EFHD2 PE=1 SV=1	8	0	66.829	1.14262e+08	61627000
sp|Q96FW1|OTUB1_HUMAN	sp|Q96FW1|OTUB1_HUMAN	>sp|Q96FW1|OTUB1_HUMAN Ubiquitin thioesterase OTUB1 OS=Homo sapiens OX=9606 GN=OTUB1 PE=1 SV=2	8	0	117.59	3.31231e+08	358610000
sp|Q96NY7|CLIC6_HUMAN	sp|Q96NY7|CLIC6_HUMAN	>sp|Q96NY7|CLIC6_HUMAN Chloride intracellular channel protein 6 OS=Homo sapiens OX=9606 GN=CLIC6 PE=2 SV=3	8	0	50.801	3.86384e+07	43479000
sp|Q96S55|WRIP1_HUMAN	sp|Q96S55|WRIP1_HUMAN	>sp|Q96S55|WRIP1_HUMAN ATPase WRNIP1 OS=Homo sapiens OX=9606 GN=WRNIP1 PE=1 SV=2	8	0	41.7	3.60472e+06	27275000
sp|Q9BSJ2|GCP2_HUMAN	sp|Q9BSJ2|GCP2_HUMAN	>sp|Q9BSJ2|GCP2_HUMAN Gamma-tubulin complex component 2 OS=Homo sapiens OX=9606 GN=TUBGCP2 PE=1 SV=2	8	0	28.016	3.62491e+07	39123000
sp|Q9BW27|NUP85_HUMAN	sp|Q9BW27|NUP85_HUMAN	>sp|Q9BW27|NUP85_HUMAN Nuclear pore complex protein Nup85 OS=Homo sapiens OX=9606 GN=NUP85 PE=1 SV=1	8	0	45.617	4.03908e+07	12344000
sp|Q9BZZ5|API5_HUMAN	sp|Q9BZZ5|API5_HUMAN	>sp|Q9BZZ5|API5_HUMAN Apoptosis inhibitor 5 OS=Homo sapiens OX=9606 GN=API5 PE=1 SV=3	8	0	108.47	1.01952e+08	118350000
sp|Q9GZY8|MFF_HUMAN	sp|Q9GZY8|MFF_HUMAN	>sp|Q9GZY8|MFF_HUMAN Mitochondrial fission factor OS=Homo sapiens OX=9606 GN=MFF PE=1 SV=1	8	0	50.867	1.66161e+08	106050000
sp|Q9H0U4|RAB1B_HUMAN;sp|Q92928|RAB1C_HUMAN	sp|Q9H0U4|RAB1B_HUMAN;sp|Q92928|RAB1C_HUMAN	>sp|Q9H0U4|RAB1B_HUMAN Ras-related protein Rab-1B OS=Homo sapiens OX=9606 GN=RAB1B PE=1 SV=1;>sp|Q92928|RAB1C_HUMAN Putative Ras-related protein Rab-1C OS=Homo sapiens OX=9606 GN=RAB1C PE=5 SV=2	8	0	29.641	2.00233e+08	231450000
sp|Q9H2D6|TARA_HUMAN	sp|Q9H2D6|TARA_HUMAN	>sp|Q9H2D6|TARA_HUMAN TRIO and F-actin-binding protein OS=Homo sapiens OX=9606 GN=TRIOBP PE=1 SV=3	8	0	63.259	2.92798e+07	39550000
sp|Q9H3S7|PTN23_HUMAN	sp|Q9H3S7|PTN23_HUMAN	>sp|Q9H3S7|PTN23_HUMAN Tyrosine-protein phosphatase non-receptor type 23 OS=Homo sapiens OX=9606 GN=PTPN23 PE=1 SV=1	8	0	47.275	2.55857e+07	36818000
sp|Q9H6T3|RPAP3_HUMAN	sp|Q9H6T3|RPAP3_HUMAN	>sp|Q9H6T3|RPAP3_HUMAN RNA polymerase II-associated protein 3 OS=Homo sapiens OX=9606 GN=RPAP3 PE=1 SV=2	8	0	46.708	2.48833e+07	6474900
sp|Q9NUQ8|ABCF3_HUMAN	sp|Q9NUQ8|ABCF3_HUMAN	>sp|Q9NUQ8|ABCF3_HUMAN ATP-binding cassette sub-family F member 3 OS=Homo sapiens OX=9606 GN=ABCF3 PE=1 SV=2	8	0	39.031	3.38656e+07	38821000
sp|Q9NVP1|DDX18_HUMAN	sp|Q9NVP1|DDX18_HUMAN	>sp|Q9NVP1|DDX18_HUMAN ATP-dependent RNA helicase DDX18 OS=Homo sapiens OX=9606 GN=DDX18 PE=1 SV=2	8	0	27.698	7.36803e+07	37013000
sp|Q9NZ01|TECR_HUMAN	sp|Q9NZ01|TECR_HUMAN	>sp|Q9NZ01|TECR_HUMAN Very-long-chain enoyl-CoA reductase OS=Homo sapiens OX=9606 GN=TECR PE=1 SV=1	8	0	34.576	8.36564e+07	149500000
sp|Q9UHI6|DDX20_HUMAN	sp|Q9UHI6|DDX20_HUMAN	>sp|Q9UHI6|DDX20_HUMAN Probable ATP-dependent RNA helicase DDX20 OS=Homo sapiens OX=9606 GN=DDX20 PE=1 SV=2	8	0	39.127	4.2989e+07	57617000
sp|Q9UI12|VATH_HUMAN	sp|Q9UI12|VATH_HUMAN	>sp|Q9UI12|VATH_HUMAN V-type proton ATPase subunit H OS=Homo sapiens OX=9606 GN=ATP6V1H PE=1 SV=1	8	0	173.99	8.84614e+07	88020000
sp|Q9Y281|COF2_HUMAN	sp|Q9Y281|COF2_HUMAN	>sp|Q9Y281|COF2_HUMAN Cofilin-2 OS=Homo sapiens OX=9606 GN=CFL2 PE=1 SV=1	8	0	60.043	6.37054e+07	48086000
sp|Q9Y383|LC7L2_HUMAN	sp|Q9Y383|LC7L2_HUMAN	>sp|Q9Y383|LC7L2_HUMAN Putative RNA-binding protein Luc7-like 2 OS=Homo sapiens OX=9606 GN=LUC7L2 PE=1 SV=2	8	0	36.6	7.34691e+07	66146000
sp|Q9Y5K5|UCHL5_HUMAN	sp|Q9Y5K5|UCHL5_HUMAN	>sp|Q9Y5K5|UCHL5_HUMAN Ubiquitin carboxyl-terminal hydrolase isozyme L5 OS=Homo sapiens OX=9606 GN=UCHL5 PE=1 SV=3	8	0	31.078	9.9476e+07	24223000
sp|Q9Y6D9|MD1L1_HUMAN	sp|Q9Y6D9|MD1L1_HUMAN	>sp|Q9Y6D9|MD1L1_HUMAN Mitotic spindle assembly checkpoint protein MAD1 OS=Homo sapiens OX=9606 GN=MAD1L1 PE=1 SV=2	8	0	53.954	1.18007e+07	16380000
sp|P0DPI2|GAL3A_HUMAN;sp|A0A0B4J2D5|GAL3B_HUMAN	sp|P0DPI2|GAL3A_HUMAN;sp|A0A0B4J2D5|GAL3B_HUMAN	>sp|P0DPI2|GAL3A_HUMAN Glutamine amidotransferase-like class 1 domain-containing protein 3A, mitochondrial OS=Homo sapiens OX=9606 GN=GATD3A PE=1 SV=1;>sp|A0A0B4J2D5|GAL3B_HUMAN Glutamine amidotransferase-like class 1 domain-containing protein 3B, mitochon	7	0	68.52	7.7488e+07	51819000
sp|A0AVT1|UBA6_HUMAN	sp|A0AVT1|UBA6_HUMAN	>sp|A0AVT1|UBA6_HUMAN Ubiquitin-like modifier-activating enzyme 6 OS=Homo sapiens OX=9606 GN=UBA6 PE=1 SV=1	7	0	19.27	1.56945e+07	24242000
sp|O00154|BACH_HUMAN	sp|O00154|BACH_HUMAN	>sp|O00154|BACH_HUMAN Cytosolic acyl coenzyme A thioester hydrolase OS=Homo sapiens OX=9606 GN=ACOT7 PE=1 SV=3	7	0	36.421	1.1997e+08	101300000
sp|O00443|P3C2A_HUMAN	sp|O00443|P3C2A_HUMAN	>sp|O00443|P3C2A_HUMAN Phosphatidylinositol 4-phosphate 3-kinase C2 domain-containing subunit alpha OS=Homo sapiens OX=9606 GN=PIK3C2A PE=1 SV=2	7	0	24.632	7.93471e+06	22751000
sp|O00487|PSDE_HUMAN	sp|O00487|PSDE_HUMAN	>sp|O00487|PSDE_HUMAN 26S proteasome non-ATPase regulatory subunit 14 OS=Homo sapiens OX=9606 GN=PSMD14 PE=1 SV=1	7	0	71.166	1.94426e+08	109800000
sp|O00505|IMA4_HUMAN	sp|O00505|IMA4_HUMAN	>sp|O00505|IMA4_HUMAN Importin subunit alpha-4 OS=Homo sapiens OX=9606 GN=KPNA3 PE=1 SV=2	7	0	47.638	3.72074e+07	31988000
sp|O14964|HGS_HUMAN	sp|O14964|HGS_HUMAN	>sp|O14964|HGS_HUMAN Hepatocyte growth factor-regulated tyrosine kinase substrate OS=Homo sapiens OX=9606 GN=HGS PE=1 SV=1	7	0	22.121	4.24048e+07	47383000
sp|O14979|HNRDL_HUMAN	sp|O14979|HNRDL_HUMAN	>sp|O14979|HNRDL_HUMAN Heterogeneous nuclear ribonucleoprotein D-like OS=Homo sapiens OX=9606 GN=HNRNPDL PE=1 SV=3	7	0	55.181	1.33133e+08	148600000
sp|O43252|PAPS1_HUMAN	sp|O43252|PAPS1_HUMAN	>sp|O43252|PAPS1_HUMAN Bifunctional 3-phosphoadenosine 5-phosphosulfate synthase 1 OS=Homo sapiens OX=9606 GN=PAPSS1 PE=1 SV=2	7	0	29.79	5.92378e+07	70941000
sp|O60645|EXOC3_HUMAN	sp|O60645|EXOC3_HUMAN	>sp|O60645|EXOC3_HUMAN Exocyst complex component 3 OS=Homo sapiens OX=9606 GN=EXOC3 PE=1 SV=3	7	0	20.668	3.37577e+07	41907000
sp|O60678|ANM3_HUMAN	sp|O60678|ANM3_HUMAN	>sp|O60678|ANM3_HUMAN Protein arginine N-methyltransferase 3 OS=Homo sapiens OX=9606 GN=PRMT3 PE=1 SV=4	7	0	27.609	4.77641e+07	28975000
sp|O60684|IMA7_HUMAN;sp|O15131|IMA6_HUMAN	sp|O60684|IMA7_HUMAN;sp|O15131|IMA6_HUMAN	>sp|O60684|IMA7_HUMAN Importin subunit alpha-7 OS=Homo sapiens OX=9606 GN=KPNA6 PE=1 SV=1;>sp|O15131|IMA6_HUMAN Importin subunit alpha-6 OS=Homo sapiens OX=9606 GN=KPNA5 PE=1 SV=2	7	0	56.746	1.47868e+07	59831000
sp|O75179|ANR17_HUMAN	sp|O75179|ANR17_HUMAN	>sp|O75179|ANR17_HUMAN Ankyrin repeat domain-containing protein 17 OS=Homo sapiens OX=9606 GN=ANKRD17 PE=1 SV=3	7	0	23.918	1.89893e+07	23375000
sp|O75340|PDCD6_HUMAN	sp|O75340|PDCD6_HUMAN	>sp|O75340|PDCD6_HUMAN Programmed cell death protein 6 OS=Homo sapiens OX=9606 GN=PDCD6 PE=1 SV=1	7	0	57.171	5.73397e+07	72597000
sp|O94851|MICA2_HUMAN	sp|O94851|MICA2_HUMAN	>sp|O94851|MICA2_HUMAN [F-actin]-monooxygenase MICAL2 OS=Homo sapiens OX=9606 GN=MICAL2 PE=1 SV=1	7	0	31.282	3.02438e+07	28013000
sp|O94901|SUN1_HUMAN	sp|O94901|SUN1_HUMAN	>sp|O94901|SUN1_HUMAN SUN domain-containing protein 1 OS=Homo sapiens OX=9606 GN=SUN1 PE=1 SV=3	7	0	41.035	1.59149e+07	19663000
sp|O95336|6PGL_HUMAN	sp|O95336|6PGL_HUMAN	>sp|O95336|6PGL_HUMAN 6-phosphogluconolactonase OS=Homo sapiens OX=9606 GN=PGLS PE=1 SV=2	7	0	45.324	9.08793e+07	88962000
sp|O95470|SGPL1_HUMAN	sp|O95470|SGPL1_HUMAN	>sp|O95470|SGPL1_HUMAN Sphingosine-1-phosphate lyase 1 OS=Homo sapiens OX=9606 GN=SGPL1 PE=1 SV=3	7	0	33.24	3.31392e+07	58443000
sp|O95486|SC24A_HUMAN	sp|O95486|SC24A_HUMAN	>sp|O95486|SC24A_HUMAN Protein transport protein Sec24A OS=Homo sapiens OX=9606 GN=SEC24A PE=1 SV=2	7	0	79.258	3.97355e+07	27917000
sp|O95833|CLIC3_HUMAN	sp|O95833|CLIC3_HUMAN	>sp|O95833|CLIC3_HUMAN Chloride intracellular channel protein 3 OS=Homo sapiens OX=9606 GN=CLIC3 PE=1 SV=2	7	0	23.79	192475	34914000
sp|P00492|HPRT_HUMAN	sp|P00492|HPRT_HUMAN	>sp|P00492|HPRT_HUMAN Hypoxanthine-guanine phosphoribosyltransferase OS=Homo sapiens OX=9606 GN=HPRT1 PE=1 SV=2	7	0	27.253	1.13848e+08	107630000
sp|P02511|CRYAB_HUMAN	sp|P02511|CRYAB_HUMAN	>sp|P02511|CRYAB_HUMAN Alpha-crystallin B chain OS=Homo sapiens OX=9606 GN=CRYAB PE=1 SV=2	7	0	106.09	9.58679e+07	150530000
sp|P05166|PCCB_HUMAN	sp|P05166|PCCB_HUMAN	>sp|P05166|PCCB_HUMAN Propionyl-CoA carboxylase beta chain, mitochondrial OS=Homo sapiens OX=9606 GN=PCCB PE=1 SV=3	7	0	47.099	1.84912e+07	24249000
sp|P06753|TPM3_HUMAN	sp|P06753|TPM3_HUMAN	>sp|P06753|TPM3_HUMAN Tropomyosin alpha-3 chain OS=Homo sapiens OX=9606 GN=TPM3 PE=1 SV=2	7	0	7.8791	2.91811e+06	11074000
sp|P07741|APT_HUMAN	sp|P07741|APT_HUMAN	>sp|P07741|APT_HUMAN Adenine phosphoribosyltransferase OS=Homo sapiens OX=9606 GN=APRT PE=1 SV=2	7	0	143.26	2.44817e+08	198300000
sp|P07948|LYN_HUMAN;sp|P08631|HCK_HUMAN	sp|P07948|LYN_HUMAN	>sp|P07948|LYN_HUMAN Tyrosine-protein kinase Lyn OS=Homo sapiens OX=9606 GN=LYN PE=1 SV=3	7	0	18.045	1.48648e+07	33266000
sp|P09382|LEG1_HUMAN	sp|P09382|LEG1_HUMAN	>sp|P09382|LEG1_HUMAN Galectin-1 OS=Homo sapiens OX=9606 GN=LGALS1 PE=1 SV=2	7	0	75.88	1.04314e+09	1346400000
sp|P10155|RO60_HUMAN	sp|P10155|RO60_HUMAN	>sp|P10155|RO60_HUMAN 60 kDa SS-A/Ro ribonucleoprotein OS=Homo sapiens OX=9606 GN=RO60 PE=1 SV=2	7	0	111.24	9.38459e+07	75014000
sp|P12004|PCNA_HUMAN	sp|P12004|PCNA_HUMAN	>sp|P12004|PCNA_HUMAN Proliferating cell nuclear antigen OS=Homo sapiens OX=9606 GN=PCNA PE=1 SV=1	7	0	131.33	1.89755e+08	213340000
sp|P12235|ADT1_HUMAN;sp|Q9H0C2|ADT4_HUMAN	sp|P12235|ADT1_HUMAN	>sp|P12235|ADT1_HUMAN ADP/ATP translocase 1 OS=Homo sapiens OX=9606 GN=SLC25A4 PE=1 SV=4	7	0.00071813	4.3187	8.07357e+06	9432700
sp|P12694|ODBA_HUMAN	sp|P12694|ODBA_HUMAN	>sp|P12694|ODBA_HUMAN 2-oxoisovalerate dehydrogenase subunit alpha, mitochondrial OS=Homo sapiens OX=9606 GN=BCKDHA PE=1 SV=2	7	0	73.82	1.17927e+08	92048000
sp|P15531|NDKA_HUMAN	sp|P15531|NDKA_HUMAN	>sp|P15531|NDKA_HUMAN Nucleoside diphosphate kinase A OS=Homo sapiens OX=9606 GN=NME1 PE=1 SV=1	7	0	19.849	4.98206e+07	65352000
sp|P16989|YBOX3_HUMAN	sp|P16989|YBOX3_HUMAN	>sp|P16989|YBOX3_HUMAN Y-box-binding protein 3 OS=Homo sapiens OX=9606 GN=YBX3 PE=1 SV=4	7	0	71.169	4.89576e+07	46822000
sp|P18583|SON_HUMAN	sp|P18583|SON_HUMAN	>sp|P18583|SON_HUMAN Protein SON OS=Homo sapiens OX=9606 GN=SON PE=1 SV=4	7	0	27.9	5.17819e+06	15678000
sp|P18621|RL17_HUMAN	sp|P18621|RL17_HUMAN	>sp|P18621|RL17_HUMAN 60S ribosomal protein L17 OS=Homo sapiens OX=9606 GN=RPL17 PE=1 SV=3	7	0	53.638	1.03361e+09	770560000
sp|P19174|PLCG1_HUMAN	sp|P19174|PLCG1_HUMAN	>sp|P19174|PLCG1_HUMAN 1-phosphatidylinositol 4,5-bisphosphate phosphodiesterase gamma-1 OS=Homo sapiens OX=9606 GN=PLCG1 PE=1 SV=1	7	0	22.81	3.92673e+07	28325000
sp|P19623|SPEE_HUMAN	sp|P19623|SPEE_HUMAN	>sp|P19623|SPEE_HUMAN Spermidine synthase OS=Homo sapiens OX=9606 GN=SRM PE=1 SV=1	7	0	37.574	1.2596e+08	177230000
sp|P19838|NFKB1_HUMAN	sp|P19838|NFKB1_HUMAN	>sp|P19838|NFKB1_HUMAN Nuclear factor NF-kappa-B p105 subunit OS=Homo sapiens OX=9606 GN=NFKB1 PE=1 SV=2	7	0	31.92	4.25437e+07	30628000
sp|P24534|EF1B_HUMAN	sp|P24534|EF1B_HUMAN	>sp|P24534|EF1B_HUMAN Elongation factor 1-beta OS=Homo sapiens OX=9606 GN=EEF1B2 PE=1 SV=3	7	0	221.57	6.93711e+08	673960000
sp|P26006|ITA3_HUMAN	sp|P26006|ITA3_HUMAN	>sp|P26006|ITA3_HUMAN Integrin alpha-3 OS=Homo sapiens OX=9606 GN=ITGA3 PE=1 SV=5	7	0	26.043	1.50186e+07	37477000
sp|P26440|IVD_HUMAN	sp|P26440|IVD_HUMAN	>sp|P26440|IVD_HUMAN Isovaleryl-CoA dehydrogenase, mitochondrial OS=Homo sapiens OX=9606 GN=IVD PE=1 SV=2	7	0	22.804	5.10589e+07	56228000
sp|P26599|PTBP1_HUMAN;sp|O95758|PTBP3_HUMAN	sp|P26599|PTBP1_HUMAN	>sp|P26599|PTBP1_HUMAN Polypyrimidine tract-binding protein 1 OS=Homo sapiens OX=9606 GN=PTBP1 PE=1 SV=1	7	0	60.717	3.98446e+07	41624000
sp|P28290|ITPI2_HUMAN	sp|P28290|ITPI2_HUMAN	>sp|P28290|ITPI2_HUMAN Protein ITPRID2 OS=Homo sapiens OX=9606 GN=ITPRID2 PE=1 SV=3	7	0	43.567	3.73267e+07	27336000
sp|P29317|EPHA2_HUMAN	sp|P29317|EPHA2_HUMAN	>sp|P29317|EPHA2_HUMAN Ephrin type-A receptor 2 OS=Homo sapiens OX=9606 GN=EPHA2 PE=1 SV=2	7	0	28.011	1.33259e+07	25595000
sp|P29992|GNA11_HUMAN;sp|O95837|GNA14_HUMAN	sp|P29992|GNA11_HUMAN	>sp|P29992|GNA11_HUMAN Guanine nucleotide-binding protein subunit alpha-11 OS=Homo sapiens OX=9606 GN=GNA11 PE=1 SV=2	7	0	16.1	2.92086e+07	34447000
sp|P31040|SDHA_HUMAN	sp|P31040|SDHA_HUMAN	>sp|P31040|SDHA_HUMAN Succinate dehydrogenase [ubiquinone] flavoprotein subunit, mitochondrial OS=Homo sapiens OX=9606 GN=SDHA PE=1 SV=2	7	0	104.84	3.54217e+07	38100000
sp|P31689|DNJA1_HUMAN	sp|P31689|DNJA1_HUMAN	>sp|P31689|DNJA1_HUMAN DnaJ homolog subfamily A member 1 OS=Homo sapiens OX=9606 GN=DNAJA1 PE=1 SV=2	7	0	68.335	1.12479e+08	72048000
sp|P31930|QCR1_HUMAN	sp|P31930|QCR1_HUMAN	>sp|P31930|QCR1_HUMAN Cytochrome b-c1 complex subunit 1, mitochondrial OS=Homo sapiens OX=9606 GN=UQCRC1 PE=1 SV=3	7	0	71.603	5.26724e+07	59833000
sp|P35052|GPC1_HUMAN	sp|P35052|GPC1_HUMAN	>sp|P35052|GPC1_HUMAN Glypican-1 OS=Homo sapiens OX=9606 GN=GPC1 PE=1 SV=2	7	0	25.756	9.66793e+06	26910000
sp|P35249|RFC4_HUMAN	sp|P35249|RFC4_HUMAN	>sp|P35249|RFC4_HUMAN Replication factor C subunit 4 OS=Homo sapiens OX=9606 GN=RFC4 PE=1 SV=2	7	0	32.392	5.14881e+07	44081000
sp|P36404|ARL2_HUMAN	sp|P36404|ARL2_HUMAN	>sp|P36404|ARL2_HUMAN ADP-ribosylation factor-like protein 2 OS=Homo sapiens OX=9606 GN=ARL2 PE=1 SV=4	7	0	49.027	8.48854e+07	79402000
sp|P37837|TALDO_HUMAN	sp|P37837|TALDO_HUMAN	>sp|P37837|TALDO_HUMAN Transaldolase OS=Homo sapiens OX=9606 GN=TALDO1 PE=1 SV=2	7	0	37.929	2.05076e+07	14115000
sp|P38117|ETFB_HUMAN	sp|P38117|ETFB_HUMAN	>sp|P38117|ETFB_HUMAN Electron transfer flavoprotein subunit beta OS=Homo sapiens OX=9606 GN=ETFB PE=1 SV=3	7	0	25.847	1.07756e+08	142480000
sp|P39019|RS19_HUMAN	sp|P39019|RS19_HUMAN	>sp|P39019|RS19_HUMAN 40S ribosomal protein S19 OS=Homo sapiens OX=9606 GN=RPS19 PE=1 SV=2	7	0	38.915	1.31503e+08	158650000
sp|P39748|FEN1_HUMAN	sp|P39748|FEN1_HUMAN	>sp|P39748|FEN1_HUMAN Flap endonuclease 1 OS=Homo sapiens OX=9606 GN=FEN1 PE=1 SV=1	7	0	117.18	1.14524e+08	115680000
sp|P40261|NNMT_HUMAN	sp|P40261|NNMT_HUMAN	>sp|P40261|NNMT_HUMAN Nicotinamide N-methyltransferase OS=Homo sapiens OX=9606 GN=NNMT PE=1 SV=1	7	0	63.073	7.59216e+07	98838000
sp|P40937|RFC5_HUMAN	sp|P40937|RFC5_HUMAN	>sp|P40937|RFC5_HUMAN Replication factor C subunit 5 OS=Homo sapiens OX=9606 GN=RFC5 PE=1 SV=1	7	0	26.043	2.06476e+07	41515000
sp|P43304|GPDM_HUMAN	sp|P43304|GPDM_HUMAN	>sp|P43304|GPDM_HUMAN Glycerol-3-phosphate dehydrogenase, mitochondrial OS=Homo sapiens OX=9606 GN=GPD2 PE=1 SV=3	7	0	54.57	4.53186e+07	29316000
sp|P43897|EFTS_HUMAN	sp|P43897|EFTS_HUMAN	>sp|P43897|EFTS_HUMAN Elongation factor Ts, mitochondrial OS=Homo sapiens OX=9606 GN=TSFM PE=1 SV=2	7	0	162.79	1.3031e+08	109640000
sp|P45954|ACDSB_HUMAN	sp|P45954|ACDSB_HUMAN	>sp|P45954|ACDSB_HUMAN Short/branched chain specific acyl-CoA dehydrogenase, mitochondrial OS=Homo sapiens OX=9606 GN=ACADSB PE=1 SV=1	7	0	36.05	2.99844e+07	79156000
sp|P46778|RL21_HUMAN	sp|P46778|RL21_HUMAN	>sp|P46778|RL21_HUMAN 60S ribosomal protein L21 OS=Homo sapiens OX=9606 GN=RPL21 PE=1 SV=2	7	0	61.296	5.75256e+08	466110000
sp|P48047|ATPO_HUMAN	sp|P48047|ATPO_HUMAN	>sp|P48047|ATPO_HUMAN ATP synthase subunit O, mitochondrial OS=Homo sapiens OX=9606 GN=ATP5PO PE=1 SV=1	7	0	36.173	3.46896e+07	56250000
sp|P48449|ERG7_HUMAN	sp|P48449|ERG7_HUMAN	>sp|P48449|ERG7_HUMAN Lanosterol synthase OS=Homo sapiens OX=9606 GN=LSS PE=1 SV=1	7	0	17.569	1.65403e+07	37995000
sp|P49023|PAXI_HUMAN	sp|P49023|PAXI_HUMAN	>sp|P49023|PAXI_HUMAN Paxillin OS=Homo sapiens OX=9606 GN=PXN PE=1 SV=3	7	0	125.24	4.42295e+07	45366000
sp|P49959|MRE11_HUMAN	sp|P49959|MRE11_HUMAN	>sp|P49959|MRE11_HUMAN Double-strand break repair protein MRE11 OS=Homo sapiens OX=9606 GN=MRE11 PE=1 SV=3	7	0	32.868	4.60175e+07	35428000
sp|P51116|FXR2_HUMAN;sp|Q06787|FMR1_HUMAN	sp|P51116|FXR2_HUMAN	>sp|P51116|FXR2_HUMAN Fragile X mental retardation syndrome-related protein 2 OS=Homo sapiens OX=9606 GN=FXR2 PE=1 SV=2	7	0	15.84	2.59575e+07	24907000
sp|P52294|IMA5_HUMAN	sp|P52294|IMA5_HUMAN	>sp|P52294|IMA5_HUMAN Importin subunit alpha-5 OS=Homo sapiens OX=9606 GN=KPNA1 PE=1 SV=3	7	0	39.049	2.68136e+07	41885000
sp|P53582|MAP11_HUMAN	sp|P53582|MAP11_HUMAN	>sp|P53582|MAP11_HUMAN Methionine aminopeptidase 1 OS=Homo sapiens OX=9606 GN=METAP1 PE=1 SV=2	7	0	31.65	8.35083e+07	71462000
sp|P53597|SUCA_HUMAN	sp|P53597|SUCA_HUMAN	>sp|P53597|SUCA_HUMAN Succinate--CoA ligase [ADP/GDP-forming] subunit alpha, mitochondrial OS=Homo sapiens OX=9606 GN=SUCLG1 PE=1 SV=4	7	0	89.32	1.01212e+08	115420000
sp|P55010|IF5_HUMAN	sp|P55010|IF5_HUMAN	>sp|P55010|IF5_HUMAN Eukaryotic translation initiation factor 5 OS=Homo sapiens OX=9606 GN=EIF5 PE=1 SV=2	7	0	37.377	1.73804e+08	177510000
sp|P55265|DSRAD_HUMAN	sp|P55265|DSRAD_HUMAN	>sp|P55265|DSRAD_HUMAN Double-stranded RNA-specific adenosine deaminase OS=Homo sapiens OX=9606 GN=ADAR PE=1 SV=4	7	0	37.76	4.08969e+07	62661000
sp|P56537|IF6_HUMAN	sp|P56537|IF6_HUMAN	>sp|P56537|IF6_HUMAN Eukaryotic translation initiation factor 6 OS=Homo sapiens OX=9606 GN=EIF6 PE=1 SV=1	7	0	118.04	1.32938e+08	151310000
sp|P57088|TMM33_HUMAN	sp|P57088|TMM33_HUMAN	>sp|P57088|TMM33_HUMAN Transmembrane protein 33 OS=Homo sapiens OX=9606 GN=TMEM33 PE=1 SV=2	7	0	51.31	1.97857e+08	164630000
sp|P60660|MYL6_HUMAN;sp|P14649|MYL6B_HUMAN	sp|P60660|MYL6_HUMAN	>sp|P60660|MYL6_HUMAN Myosin light polypeptide 6 OS=Homo sapiens OX=9606 GN=MYL6 PE=1 SV=2	7	0	149.61	5.73293e+08	592760000
sp|P60900|PSA6_HUMAN	sp|P60900|PSA6_HUMAN	>sp|P60900|PSA6_HUMAN Proteasome subunit alpha type-6 OS=Homo sapiens OX=9606 GN=PSMA6 PE=1 SV=1	7	0	31.079	6.96213e+07	79079000
sp|P61604|CH10_HUMAN	sp|P61604|CH10_HUMAN	>sp|P61604|CH10_HUMAN 10 kDa heat shock protein, mitochondrial OS=Homo sapiens OX=9606 GN=HSPE1 PE=1 SV=2	7	0	26.19	1.09281e+08	130040000
sp|P61764|STXB1_HUMAN	sp|P61764|STXB1_HUMAN	>sp|P61764|STXB1_HUMAN Syntaxin-binding protein 1 OS=Homo sapiens OX=9606 GN=STXBP1 PE=1 SV=1	7	0	40.028	1.08768e+07	18217000
sp|P62081|RS7_HUMAN	sp|P62081|RS7_HUMAN	>sp|P62081|RS7_HUMAN 40S ribosomal protein S7 OS=Homo sapiens OX=9606 GN=RPS7 PE=1 SV=1	7	0	134.81	2.24481e+08	258740000
sp|P62263|RS14_HUMAN	sp|P62263|RS14_HUMAN	>sp|P62263|RS14_HUMAN 40S ribosomal protein S14 OS=Homo sapiens OX=9606 GN=RPS14 PE=1 SV=3	7	0	76.772	7.91004e+08	701060000
sp|P62491|RB11A_HUMAN;sp|Q15907|RB11B_HUMAN;sp|P57735|RAB25_HUMAN	sp|P62491|RB11A_HUMAN;sp|Q15907|RB11B_HUMAN	>sp|P62491|RB11A_HUMAN Ras-related protein Rab-11A OS=Homo sapiens OX=9606 GN=RAB11A PE=1 SV=3;>sp|Q15907|RB11B_HUMAN Ras-related protein Rab-11B OS=Homo sapiens OX=9606 GN=RAB11B PE=1 SV=4	7	0	17.992	3.3659e+07	20197000
sp|P62820|RAB1A_HUMAN	sp|P62820|RAB1A_HUMAN	>sp|P62820|RAB1A_HUMAN Ras-related protein Rab-1A OS=Homo sapiens OX=9606 GN=RAB1A PE=1 SV=3	7	0	19.497	8.13371e+06	8687600
sp|P62917|RL8_HUMAN	sp|P62917|RL8_HUMAN	>sp|P62917|RL8_HUMAN 60S ribosomal protein L8 OS=Homo sapiens OX=9606 GN=RPL8 PE=1 SV=2	7	0	77.283	9.59012e+08	762360000
sp|P63000|RAC1_HUMAN;sp|P15153|RAC2_HUMAN;sp|P60763|RAC3_HUMAN	sp|P63000|RAC1_HUMAN;sp|P15153|RAC2_HUMAN	>sp|P63000|RAC1_HUMAN Ras-related C3 botulinum toxin substrate 1 OS=Homo sapiens OX=9606 GN=RAC1 PE=1 SV=1;>sp|P15153|RAC2_HUMAN Ras-related C3 botulinum toxin substrate 2 OS=Homo sapiens OX=9606 GN=RAC2 PE=1 SV=1	7	0	42.543	1.00517e+08	134130000
sp|P82933|RT09_HUMAN	sp|P82933|RT09_HUMAN	>sp|P82933|RT09_HUMAN 28S ribosomal protein S9, mitochondrial OS=Homo sapiens OX=9606 GN=MRPS9 PE=1 SV=2	7	0	36.37	2.68916e+07	25817000
sp|Q03154|ACY1_HUMAN	sp|Q03154|ACY1_HUMAN	>sp|Q03154|ACY1_HUMAN Aminoacylase-1 OS=Homo sapiens OX=9606 GN=ACY1 PE=1 SV=1	7	0	48.02	1.72908e+07	31490000
sp|Q13098|CSN1_HUMAN	sp|Q13098|CSN1_HUMAN	>sp|Q13098|CSN1_HUMAN COP9 signalosome complex subunit 1 OS=Homo sapiens OX=9606 GN=GPS1 PE=1 SV=4	7	0	48.358	9.28016e+07	77786000
sp|Q13217|DNJC3_HUMAN	sp|Q13217|DNJC3_HUMAN	>sp|Q13217|DNJC3_HUMAN DnaJ homolog subfamily C member 3 OS=Homo sapiens OX=9606 GN=DNAJC3 PE=1 SV=1	7	0	57.547	2.96149e+07	47016000
sp|Q13363|CTBP1_HUMAN	sp|Q13363|CTBP1_HUMAN	>sp|Q13363|CTBP1_HUMAN C-terminal-binding protein 1 OS=Homo sapiens OX=9606 GN=CTBP1 PE=1 SV=2	7	0	32.684	7.11843e+07	65443000
sp|Q13451|FKBP5_HUMAN	sp|Q13451|FKBP5_HUMAN	>sp|Q13451|FKBP5_HUMAN Peptidyl-prolyl cis-trans isomerase FKBP5 OS=Homo sapiens OX=9606 GN=FKBP5 PE=1 SV=2	7	0	21.138	3.54332e+07	49686000
sp|Q13501|SQSTM_HUMAN	sp|Q13501|SQSTM_HUMAN	>sp|Q13501|SQSTM_HUMAN Sequestosome-1 OS=Homo sapiens OX=9606 GN=SQSTM1 PE=1 SV=1	7	0	255.1	8.56509e+07	81926000
sp|Q13618|CUL3_HUMAN	sp|Q13618|CUL3_HUMAN	>sp|Q13618|CUL3_HUMAN Cullin-3 OS=Homo sapiens OX=9606 GN=CUL3 PE=1 SV=2	7	0	21.526	5.54289e+07	8963600
sp|Q13637|RAB32_HUMAN;sp|P57729|RAB38_HUMAN;sp|O14966|RAB7L_HUMAN	sp|Q13637|RAB32_HUMAN	>sp|Q13637|RAB32_HUMAN Ras-related protein Rab-32 OS=Homo sapiens OX=9606 GN=RAB32 PE=1 SV=3	7	0	38.25	6.45179e+07	44939000
sp|Q14376|GALE_HUMAN	sp|Q14376|GALE_HUMAN	>sp|Q14376|GALE_HUMAN UDP-glucose 4-epimerase OS=Homo sapiens OX=9606 GN=GALE PE=1 SV=2	7	0	93.74	7.42059e+07	68090000
sp|Q14651|PLSI_HUMAN	sp|Q14651|PLSI_HUMAN	>sp|Q14651|PLSI_HUMAN Plastin-1 OS=Homo sapiens OX=9606 GN=PLS1 PE=1 SV=2	7	0	86.314	1.09616e+07	5379900
sp|Q14669|TRIPC_HUMAN	sp|Q14669|TRIPC_HUMAN	>sp|Q14669|TRIPC_HUMAN E3 ubiquitin-protein ligase TRIP12 OS=Homo sapiens OX=9606 GN=TRIP12 PE=1 SV=1	7	0	32.102	1.53307e+07	15779000
sp|Q15003|CND2_HUMAN	sp|Q15003|CND2_HUMAN	>sp|Q15003|CND2_HUMAN Condensin complex subunit 2 OS=Homo sapiens OX=9606 GN=NCAPH PE=1 SV=3	7	0	27.604	5.68278e+07	40807000
sp|Q15785|TOM34_HUMAN	sp|Q15785|TOM34_HUMAN	>sp|Q15785|TOM34_HUMAN Mitochondrial import receptor subunit TOM34 OS=Homo sapiens OX=9606 GN=TOMM34 PE=1 SV=2	7	0	144.9	1.23711e+08	104420000
sp|Q16543|CDC37_HUMAN	sp|Q16543|CDC37_HUMAN	>sp|Q16543|CDC37_HUMAN Hsp90 co-chaperone Cdc37 OS=Homo sapiens OX=9606 GN=CDC37 PE=1 SV=1	7	0	75.223	2.47583e+08	244590000
sp|Q16576|RBBP7_HUMAN	sp|Q16576|RBBP7_HUMAN	>sp|Q16576|RBBP7_HUMAN Histone-binding protein RBBP7 OS=Homo sapiens OX=9606 GN=RBBP7 PE=1 SV=1	7	0	98.238	1.53285e+08	142780000
sp|Q16698|DECR_HUMAN	sp|Q16698|DECR_HUMAN	>sp|Q16698|DECR_HUMAN 2,4-dienoyl-CoA reductase, mitochondrial OS=Homo sapiens OX=9606 GN=DECR1 PE=1 SV=1	7	0	137.89	2.08495e+08	152340000
sp|Q2M389|WASC4_HUMAN	sp|Q2M389|WASC4_HUMAN	>sp|Q2M389|WASC4_HUMAN WASH complex subunit 4 OS=Homo sapiens OX=9606 GN=WASHC4 PE=1 SV=2	7	0	26.69	2.85189e+07	24570000
sp|Q4G0F5|VP26B_HUMAN	sp|Q4G0F5|VP26B_HUMAN	>sp|Q4G0F5|VP26B_HUMAN Vacuolar protein sorting-associated protein 26B OS=Homo sapiens OX=9606 GN=VPS26B PE=1 SV=2	7	0	22.833	8.06669e+07	64117000
sp|Q53GS9|SNUT2_HUMAN	sp|Q53GS9|SNUT2_HUMAN	>sp|Q53GS9|SNUT2_HUMAN U4/U6.U5 tri-snRNP-associated protein 2 OS=Homo sapiens OX=9606 GN=USP39 PE=1 SV=2	7	0	24.72	4.91378e+07	46225000
sp|Q5H9R7|PP6R3_HUMAN	sp|Q5H9R7|PP6R3_HUMAN	>sp|Q5H9R7|PP6R3_HUMAN Serine/threonine-protein phosphatase 6 regulatory subunit 3 OS=Homo sapiens OX=9606 GN=PPP6R3 PE=1 SV=2	7	0	106.12	4.61024e+07	51944000
sp|Q5JRX3|PREP_HUMAN	sp|Q5JRX3|PREP_HUMAN	>sp|Q5JRX3|PREP_HUMAN Presequence protease, mitochondrial OS=Homo sapiens OX=9606 GN=PITRM1 PE=1 SV=3	7	0	28.23	3.72361e+07	44302000
sp|Q5JVF3|PCID2_HUMAN	sp|Q5JVF3|PCID2_HUMAN	>sp|Q5JVF3|PCID2_HUMAN PCI domain-containing protein 2 OS=Homo sapiens OX=9606 GN=PCID2 PE=1 SV=2	7	0	35.104	1.3132e+08	100290000
sp|Q5T6F2|UBAP2_HUMAN	sp|Q5T6F2|UBAP2_HUMAN	>sp|Q5T6F2|UBAP2_HUMAN Ubiquitin-associated protein 2 OS=Homo sapiens OX=9606 GN=UBAP2 PE=1 SV=1	7	0	18.504	5.44087e+06	4455400
sp|Q5VW36|FOCAD_HUMAN	sp|Q5VW36|FOCAD_HUMAN	>sp|Q5VW36|FOCAD_HUMAN Focadhesin OS=Homo sapiens OX=9606 GN=FOCAD PE=1 SV=1	7	0	20.252	1.3101e+07	14286000
sp|Q6L8Q7|PDE12_HUMAN	sp|Q6L8Q7|PDE12_HUMAN	>sp|Q6L8Q7|PDE12_HUMAN 2,5-phosphodiesterase 12 OS=Homo sapiens OX=9606 GN=PDE12 PE=1 SV=2	7	0	72.952	6.46051e+07	35351000
sp|Q6P996|PDXD1_HUMAN;sp|Q6P474|PDXD2_HUMAN	sp|Q6P996|PDXD1_HUMAN	>sp|Q6P996|PDXD1_HUMAN Pyridoxal-dependent decarboxylase domain-containing protein 1 OS=Homo sapiens OX=9606 GN=PDXDC1 PE=1 SV=2	7	0	34.861	3.39769e+07	94005000
sp|Q6PI48|SYDM_HUMAN	sp|Q6PI48|SYDM_HUMAN	>sp|Q6PI48|SYDM_HUMAN Aspartate--tRNA ligase, mitochondrial OS=Homo sapiens OX=9606 GN=DARS2 PE=1 SV=1	7	0	20.836	2.64165e+07	42437000
sp|Q6UB35|C1TM_HUMAN	sp|Q6UB35|C1TM_HUMAN	>sp|Q6UB35|C1TM_HUMAN Monofunctional C1-tetrahydrofolate synthase, mitochondrial OS=Homo sapiens OX=9606 GN=MTHFD1L PE=1 SV=1	7	0	29.152	3.67747e+07	35706000
sp|Q7L014|DDX46_HUMAN	sp|Q7L014|DDX46_HUMAN	>sp|Q7L014|DDX46_HUMAN Probable ATP-dependent RNA helicase DDX46 OS=Homo sapiens OX=9606 GN=DDX46 PE=1 SV=2	7	0	15.133	2.69708e+07	21226000
sp|Q7Z460|CLAP1_HUMAN	sp|Q7Z460|CLAP1_HUMAN	>sp|Q7Z460|CLAP1_HUMAN CLIP-associating protein 1 OS=Homo sapiens OX=9606 GN=CLASP1 PE=1 SV=1	7	0	14.552	3.58922e+06	22168000
sp|Q86TI2|DPP9_HUMAN	sp|Q86TI2|DPP9_HUMAN	>sp|Q86TI2|DPP9_HUMAN Dipeptidyl peptidase 9 OS=Homo sapiens OX=9606 GN=DPP9 PE=1 SV=3	7	0	32.664	3.79292e+07	40408000
sp|Q86VS8|HOOK3_HUMAN	sp|Q86VS8|HOOK3_HUMAN	>sp|Q86VS8|HOOK3_HUMAN Protein Hook homolog 3 OS=Homo sapiens OX=9606 GN=HOOK3 PE=1 SV=2	7	0	33.024	9.83422e+06	29140000
sp|Q8IVF2|AHNK2_HUMAN	sp|Q8IVF2|AHNK2_HUMAN	>sp|Q8IVF2|AHNK2_HUMAN Protein AHNAK2 OS=Homo sapiens OX=9606 GN=AHNAK2 PE=1 SV=2	7	0	28.379	3.03413e+07	54403000
sp|Q8IY17|PLPL6_HUMAN	sp|Q8IY17|PLPL6_HUMAN	>sp|Q8IY17|PLPL6_HUMAN Neuropathy target esterase OS=Homo sapiens OX=9606 GN=PNPLA6 PE=1 SV=3	7	0	25.25	3.2866e+07	18530000
sp|Q8NE71|ABCF1_HUMAN	sp|Q8NE71|ABCF1_HUMAN	>sp|Q8NE71|ABCF1_HUMAN ATP-binding cassette sub-family F member 1 OS=Homo sapiens OX=9606 GN=ABCF1 PE=1 SV=2	7	0	56.485	4.97208e+07	43936000
sp|Q8WYP5|ELYS_HUMAN	sp|Q8WYP5|ELYS_HUMAN	>sp|Q8WYP5|ELYS_HUMAN Protein ELYS OS=Homo sapiens OX=9606 GN=AHCTF1 PE=1 SV=3	7	0	15.968	1.87322e+08	169750000
sp|Q92747|ARC1A_HUMAN	sp|Q92747|ARC1A_HUMAN	>sp|Q92747|ARC1A_HUMAN Actin-related protein 2/3 complex subunit 1A OS=Homo sapiens OX=9606 GN=ARPC1A PE=2 SV=2	7	0	38.547	1.33041e+08	132220000
sp|Q96J02|ITCH_HUMAN;sp|Q9H0M0|WWP1_HUMAN	sp|Q96J02|ITCH_HUMAN	>sp|Q96J02|ITCH_HUMAN E3 ubiquitin-protein ligase Itchy homolog OS=Homo sapiens OX=9606 GN=ITCH PE=1 SV=2	7	0	19.122	3.02851e+07	32554000
sp|Q96N66|MBOA7_HUMAN	sp|Q96N66|MBOA7_HUMAN	>sp|Q96N66|MBOA7_HUMAN Lysophospholipid acyltransferase 7 OS=Homo sapiens OX=9606 GN=MBOAT7 PE=1 SV=2	7	0	109.01	1.6973e+08	241110000
sp|Q99733|NP1L4_HUMAN	sp|Q99733|NP1L4_HUMAN	>sp|Q99733|NP1L4_HUMAN Nucleosome assembly protein 1-like 4 OS=Homo sapiens OX=9606 GN=NAP1L4 PE=1 SV=1	7	0	128.91	5.08259e+07	58229000
sp|Q9BPX3|CND3_HUMAN	sp|Q9BPX3|CND3_HUMAN	>sp|Q9BPX3|CND3_HUMAN Condensin complex subunit 3 OS=Homo sapiens OX=9606 GN=NCAPG PE=1 SV=1	7	0	48.817	5.13102e+07	44383000
sp|Q9BRK5|CAB45_HUMAN	sp|Q9BRK5|CAB45_HUMAN	>sp|Q9BRK5|CAB45_HUMAN 45 kDa calcium-binding protein OS=Homo sapiens OX=9606 GN=SDF4 PE=1 SV=1	7	0	323.31	6.27598e+07	59772000
sp|Q9BTE3|MCMBP_HUMAN	sp|Q9BTE3|MCMBP_HUMAN	>sp|Q9BTE3|MCMBP_HUMAN Mini-chromosome maintenance complex-binding protein OS=Homo sapiens OX=9606 GN=MCMBP PE=1 SV=2	7	0	21.132	6.96717e+07	37614000
sp|Q9BUJ2|HNRL1_HUMAN	sp|Q9BUJ2|HNRL1_HUMAN	>sp|Q9BUJ2|HNRL1_HUMAN Heterogeneous nuclear ribonucleoprotein U-like protein 1 OS=Homo sapiens OX=9606 GN=HNRNPUL1 PE=1 SV=2	7	0	19.113	5.13079e+07	37346000
sp|Q9BY89|K1671_HUMAN	sp|Q9BY89|K1671_HUMAN	>sp|Q9BY89|K1671_HUMAN Uncharacterized protein KIAA1671 OS=Homo sapiens OX=9606 GN=KIAA1671 PE=1 SV=2	7	0	19.913	1.24044e+07	17561000
sp|Q9BZG1|RAB34_HUMAN	sp|Q9BZG1|RAB34_HUMAN	>sp|Q9BZG1|RAB34_HUMAN Ras-related protein Rab-34 OS=Homo sapiens OX=9606 GN=RAB34 PE=1 SV=1	7	0	53.843	7.2854e+07	80617000
sp|Q9BZQ8|NIBA1_HUMAN	sp|Q9BZQ8|NIBA1_HUMAN	>sp|Q9BZQ8|NIBA1_HUMAN Protein Niban 1 OS=Homo sapiens OX=9606 GN=NIBAN1 PE=1 SV=1	7	0	80.675	3.74369e+07	34805000
sp|Q9H270|VPS11_HUMAN	sp|Q9H270|VPS11_HUMAN	>sp|Q9H270|VPS11_HUMAN Vacuolar protein sorting-associated protein 11 homolog OS=Homo sapiens OX=9606 GN=VPS11 PE=1 SV=1	7	0	49.306	2.42063e+07	24882000
sp|Q9H3N1|TMX1_HUMAN	sp|Q9H3N1|TMX1_HUMAN	>sp|Q9H3N1|TMX1_HUMAN Thioredoxin-related transmembrane protein 1 OS=Homo sapiens OX=9606 GN=TMX1 PE=1 SV=1	7	0	43.031	1.12943e+08	153820000
sp|Q9H4A3|WNK1_HUMAN	sp|Q9H4A3|WNK1_HUMAN	>sp|Q9H4A3|WNK1_HUMAN Serine/threonine-protein kinase WNK1 OS=Homo sapiens OX=9606 GN=WNK1 PE=1 SV=2	7	0	30.1	2.94657e+07	31928000
sp|Q9H4A4|AMPB_HUMAN	sp|Q9H4A4|AMPB_HUMAN	>sp|Q9H4A4|AMPB_HUMAN Aminopeptidase B OS=Homo sapiens OX=9606 GN=RNPEP PE=1 SV=2	7	0	16.83	5.72559e+06	12541000
sp|Q9H7Z7|PGES2_HUMAN	sp|Q9H7Z7|PGES2_HUMAN	>sp|Q9H7Z7|PGES2_HUMAN Prostaglandin E synthase 2 OS=Homo sapiens OX=9606 GN=PTGES2 PE=1 SV=1	7	0	64.049	7.03454e+07	54033000
sp|Q9H9T3|ELP3_HUMAN	sp|Q9H9T3|ELP3_HUMAN	>sp|Q9H9T3|ELP3_HUMAN Elongator complex protein 3 OS=Homo sapiens OX=9606 GN=ELP3 PE=1 SV=2	7	0	34.656	4.1613e+07	26922000
sp|Q9NRG9|AAAS_HUMAN	sp|Q9NRG9|AAAS_HUMAN	>sp|Q9NRG9|AAAS_HUMAN Aladin OS=Homo sapiens OX=9606 GN=AAAS PE=1 SV=1	7	0	23.785	2.69284e+07	30918000
sp|Q9NYY8|FAKD2_HUMAN	sp|Q9NYY8|FAKD2_HUMAN	>sp|Q9NYY8|FAKD2_HUMAN FAST kinase domain-containing protein 2, mitochondrial OS=Homo sapiens OX=9606 GN=FASTKD2 PE=1 SV=1	7	0	34.449	3.30083e+07	24320000
sp|Q9NZ08|ERAP1_HUMAN	sp|Q9NZ08|ERAP1_HUMAN	>sp|Q9NZ08|ERAP1_HUMAN Endoplasmic reticulum aminopeptidase 1 OS=Homo sapiens OX=9606 GN=ERAP1 PE=1 SV=3	7	0	23.569	2.99603e+07	30396000
sp|Q9P253|VPS18_HUMAN	sp|Q9P253|VPS18_HUMAN	>sp|Q9P253|VPS18_HUMAN Vacuolar protein sorting-associated protein 18 homolog OS=Homo sapiens OX=9606 GN=VPS18 PE=1 SV=2	7	0	26.231	1.92418e+07	38006000
sp|Q9P265|DIP2B_HUMAN;sp|Q14689|DIP2A_HUMAN	sp|Q9P265|DIP2B_HUMAN	>sp|Q9P265|DIP2B_HUMAN Disco-interacting protein 2 homolog B OS=Homo sapiens OX=9606 GN=DIP2B PE=1 SV=3	7	0	41.677	2.41604e+07	71741000
sp|Q9P2R7|SUCB1_HUMAN	sp|Q9P2R7|SUCB1_HUMAN	>sp|Q9P2R7|SUCB1_HUMAN Succinate--CoA ligase [ADP-forming] subunit beta, mitochondrial OS=Homo sapiens OX=9606 GN=SUCLA2 PE=1 SV=3	7	0	27.497	3.69136e+07	36950000
sp|Q9UHD2|TBK1_HUMAN	sp|Q9UHD2|TBK1_HUMAN	>sp|Q9UHD2|TBK1_HUMAN Serine/threonine-protein kinase TBK1 OS=Homo sapiens OX=9606 GN=TBK1 PE=1 SV=1	7	0	27.994	1.00441e+08	58838000
sp|Q9UID3|VPS51_HUMAN	sp|Q9UID3|VPS51_HUMAN	>sp|Q9UID3|VPS51_HUMAN Vacuolar protein sorting-associated protein 51 homolog OS=Homo sapiens OX=9606 GN=VPS51 PE=1 SV=2	7	0	40.159	1.88034e+07	33575000
sp|Q9ULC4|MCTS1_HUMAN	sp|Q9ULC4|MCTS1_HUMAN	>sp|Q9ULC4|MCTS1_HUMAN Malignant T-cell-amplified sequence 1 OS=Homo sapiens OX=9606 GN=MCTS1 PE=1 SV=1	7	0	35.353	9.98065e+07	124860000
sp|Q9UN37|VPS4A_HUMAN;sp|O75351|VPS4B_HUMAN;sp|Q6PIW4|FIGL1_HUMAN	sp|Q9UN37|VPS4A_HUMAN	>sp|Q9UN37|VPS4A_HUMAN Vacuolar protein sorting-associated protein 4A OS=Homo sapiens OX=9606 GN=VPS4A PE=1 SV=1	7	0	29.766	7.38559e+07	78909000
sp|Q9UNF1|MAGD2_HUMAN	sp|Q9UNF1|MAGD2_HUMAN	>sp|Q9UNF1|MAGD2_HUMAN Melanoma-associated antigen D2 OS=Homo sapiens OX=9606 GN=MAGED2 PE=1 SV=2	7	0	101.03	5.78905e+07	52782000
sp|Q9Y224|RTRAF_HUMAN	sp|Q9Y224|RTRAF_HUMAN	>sp|Q9Y224|RTRAF_HUMAN RNA transcription, translation and transport factor protein OS=Homo sapiens OX=9606 GN=RTRAF PE=1 SV=1	7	0	97.41	3.78971e+07	44849000
sp|Q9Y2D5|AKAP2_HUMAN	sp|Q9Y2D5|AKAP2_HUMAN	>sp|Q9Y2D5|AKAP2_HUMAN A-kinase anchor protein 2 OS=Homo sapiens OX=9606 GN=AKAP2 PE=1 SV=3	7	0	57.241	3.36831e+07	43483000
sp|Q9Y2L1|RRP44_HUMAN	sp|Q9Y2L1|RRP44_HUMAN	>sp|Q9Y2L1|RRP44_HUMAN Exosome complex exonuclease RRP44 OS=Homo sapiens OX=9606 GN=DIS3 PE=1 SV=2	7	0	36.244	1.87494e+07	36946000
sp|Q9Y399|RT02_HUMAN	sp|Q9Y399|RT02_HUMAN	>sp|Q9Y399|RT02_HUMAN 28S ribosomal protein S2, mitochondrial OS=Homo sapiens OX=9606 GN=MRPS2 PE=1 SV=1	7	0	13.537	3.19112e+07	33319000
sp|Q9Y5K6|CD2AP_HUMAN	sp|Q9Y5K6|CD2AP_HUMAN	>sp|Q9Y5K6|CD2AP_HUMAN CD2-associated protein OS=Homo sapiens OX=9606 GN=CD2AP PE=1 SV=1	7	0	31.377	1.24595e+07	22613000
sp|Q9Y5M8|SRPRB_HUMAN	sp|Q9Y5M8|SRPRB_HUMAN	>sp|Q9Y5M8|SRPRB_HUMAN Signal recognition particle receptor subunit beta OS=Homo sapiens OX=9606 GN=SRPRB PE=1 SV=3	7	0	93.403	1.2806e+08	100810000
sp|Q9Y5X1|SNX9_HUMAN	sp|Q9Y5X1|SNX9_HUMAN	>sp|Q9Y5X1|SNX9_HUMAN Sorting nexin-9 OS=Homo sapiens OX=9606 GN=SNX9 PE=1 SV=1	7	0	93.009	1.02359e+08	106230000
sp|Q9Y697|NFS1_HUMAN	sp|Q9Y697|NFS1_HUMAN	>sp|Q9Y697|NFS1_HUMAN Cysteine desulfurase, mitochondrial OS=Homo sapiens OX=9606 GN=NFS1 PE=1 SV=3	7	0	32.253	2.83112e+07	13287000
sp|Q9Y6G9|DC1L1_HUMAN	sp|Q9Y6G9|DC1L1_HUMAN	>sp|Q9Y6G9|DC1L1_HUMAN Cytoplasmic dynein 1 light intermediate chain 1 OS=Homo sapiens OX=9606 GN=DYNC1LI1 PE=1 SV=3	7	0	36.762	2.94152e+07	33469000
sp|Q9Y6K5|OAS3_HUMAN	sp|Q9Y6K5|OAS3_HUMAN	>sp|Q9Y6K5|OAS3_HUMAN 2-5-oligoadenylate synthase 3 OS=Homo sapiens OX=9606 GN=OAS3 PE=1 SV=3	7	0	50.867	2.62455e+07	31795000
sp|Q9Y6N5|SQOR_HUMAN	sp|Q9Y6N5|SQOR_HUMAN	>sp|Q9Y6N5|SQOR_HUMAN Sulfide:quinone oxidoreductase, mitochondrial OS=Homo sapiens OX=9606 GN=SQOR PE=1 SV=1	7	0	30.654	3.82494e+07	58265000
sp|O00151|PDLI1_HUMAN	sp|O00151|PDLI1_HUMAN	>sp|O00151|PDLI1_HUMAN PDZ and LIM domain protein 1 OS=Homo sapiens OX=9606 GN=PDLIM1 PE=1 SV=4	6	0	52.616	2.69157e+07	42200000
sp|O00471|EXOC5_HUMAN	sp|O00471|EXOC5_HUMAN	>sp|O00471|EXOC5_HUMAN Exocyst complex component 5 OS=Homo sapiens OX=9606 GN=EXOC5 PE=1 SV=1	6	0	31.883	3.13248e+07	26494000
sp|O00541|PESC_HUMAN	sp|O00541|PESC_HUMAN	>sp|O00541|PESC_HUMAN Pescadillo homolog OS=Homo sapiens OX=9606 GN=PES1 PE=1 SV=1	6	0	16.23	3.63777e+07	27763000
sp|O15260|SURF4_HUMAN	sp|O15260|SURF4_HUMAN	>sp|O15260|SURF4_HUMAN Surfeit locus protein 4 OS=Homo sapiens OX=9606 GN=SURF4 PE=1 SV=3	6	0	188.75	1.85635e+08	229750000
sp|O43156|TTI1_HUMAN	sp|O43156|TTI1_HUMAN	>sp|O43156|TTI1_HUMAN TELO2-interacting protein 1 homolog OS=Homo sapiens OX=9606 GN=TTI1 PE=1 SV=3	6	0	69.845	1.702e+07	11722000
sp|O43681|ASNA_HUMAN	sp|O43681|ASNA_HUMAN	>sp|O43681|ASNA_HUMAN ATPase ASNA1 OS=Homo sapiens OX=9606 GN=ASNA1 PE=1 SV=2	6	0	28.809	8.23825e+07	52358000
sp|O75390|CISY_HUMAN	sp|O75390|CISY_HUMAN	>sp|O75390|CISY_HUMAN Citrate synthase, mitochondrial OS=Homo sapiens OX=9606 GN=CS PE=1 SV=2	6	0	27.157	2.22508e+07	30431000
sp|O75569|PRKRA_HUMAN	sp|O75569|PRKRA_HUMAN	>sp|O75569|PRKRA_HUMAN Interferon-inducible double-stranded RNA-dependent protein kinase activator A OS=Homo sapiens OX=9606 GN=PRKRA PE=1 SV=1	6	0	31.667	6.63208e+07	75513000
sp|O94776|MTA2_HUMAN;sp|Q9BTC8|MTA3_HUMAN;sp|Q13330|MTA1_HUMAN	sp|O94776|MTA2_HUMAN	>sp|O94776|MTA2_HUMAN Metastasis-associated protein MTA2 OS=Homo sapiens OX=9606 GN=MTA2 PE=1 SV=1	6	0	30.696	3.30083e+07	35612000
sp|O95071|UBR5_HUMAN	sp|O95071|UBR5_HUMAN	>sp|O95071|UBR5_HUMAN E3 ubiquitin-protein ligase UBR5 OS=Homo sapiens OX=9606 GN=UBR5 PE=1 SV=2	6	0	12.9	3.45105e+08	211820000
sp|O95248|MTMR5_HUMAN	sp|O95248|MTMR5_HUMAN	>sp|O95248|MTMR5_HUMAN Myotubularin-related protein 5 OS=Homo sapiens OX=9606 GN=SBF1 PE=1 SV=4	6	0	14.238	1.59045e+06	11445000
sp|O95352|ATG7_HUMAN	sp|O95352|ATG7_HUMAN	>sp|O95352|ATG7_HUMAN Ubiquitin-like modifier-activating enzyme ATG7 OS=Homo sapiens OX=9606 GN=ATG7 PE=1 SV=1	6	0	14.666	1.6911e+07	26938000
sp|O95394|AGM1_HUMAN	sp|O95394|AGM1_HUMAN	>sp|O95394|AGM1_HUMAN Phosphoacetylglucosamine mutase OS=Homo sapiens OX=9606 GN=PGM3 PE=1 SV=1	6	0	32.407	2.09264e+07	26872000
sp|O95433|AHSA1_HUMAN	sp|O95433|AHSA1_HUMAN	>sp|O95433|AHSA1_HUMAN Activator of 90 kDa heat shock protein ATPase homolog 1 OS=Homo sapiens OX=9606 GN=AHSA1 PE=1 SV=1	6	0	48.52	5.44845e+08	230010000
sp|O95816|BAG2_HUMAN	sp|O95816|BAG2_HUMAN	>sp|O95816|BAG2_HUMAN BAG family molecular chaperone regulator 2 OS=Homo sapiens OX=9606 GN=BAG2 PE=1 SV=1	6	0	36.594	1.1857e+08	101120000
sp|P01034|CYTC_HUMAN	sp|P01034|CYTC_HUMAN	>sp|P01034|CYTC_HUMAN Cystatin-C OS=Homo sapiens OX=9606 GN=CST3 PE=1 SV=1	6	0	49.323	0	0
sp|P04040|CATA_HUMAN	sp|P04040|CATA_HUMAN	>sp|P04040|CATA_HUMAN Catalase OS=Homo sapiens OX=9606 GN=CAT PE=1 SV=3	6	0	32.911	3.67116e+06	3940700
sp|P05165|PCCA_HUMAN	sp|P05165|PCCA_HUMAN	>sp|P05165|PCCA_HUMAN Propionyl-CoA carboxylase alpha chain, mitochondrial OS=Homo sapiens OX=9606 GN=PCCA PE=1 SV=4	6	0	12.827	2.79279e+07	19062000
sp|P06730|IF4E_HUMAN;sp|A6NMX2|I4E1B_HUMAN	sp|P06730|IF4E_HUMAN	>sp|P06730|IF4E_HUMAN Eukaryotic translation initiation factor 4E OS=Homo sapiens OX=9606 GN=EIF4E PE=1 SV=2	6	0	26.145	1.67584e+08	185610000
sp|P08708|RS17_HUMAN	sp|P08708|RS17_HUMAN	>sp|P08708|RS17_HUMAN 40S ribosomal protein S17 OS=Homo sapiens OX=9606 GN=RPS17 PE=1 SV=2	6	0	156.98	3.313e+08	343740000
sp|P09619|PGFRB_HUMAN	sp|P09619|PGFRB_HUMAN	>sp|P09619|PGFRB_HUMAN Platelet-derived growth factor receptor beta OS=Homo sapiens OX=9606 GN=PDGFRB PE=1 SV=1	6	0	21.558	4.0812e+07	61364000
sp|P0C0L4|CO4A_HUMAN;sp|P0C0L5|CO4B_HUMAN;CON__P01030;CON__ENSEMBL:ENSBTAP00000007350	sp|P0C0L4|CO4A_HUMAN;sp|P0C0L5|CO4B_HUMAN	>sp|P0C0L4|CO4A_HUMAN Complement C4-A OS=Homo sapiens OX=9606 GN=C4A PE=1 SV=2;>sp|P0C0L5|CO4B_HUMAN Complement C4-B OS=Homo sapiens OX=9606 GN=C4B PE=1 SV=2	6	0	114.95	4.39816e+07	12209000
sp|P11387|TOP1_HUMAN	sp|P11387|TOP1_HUMAN	>sp|P11387|TOP1_HUMAN DNA topoisomerase 1 OS=Homo sapiens OX=9606 GN=TOP1 PE=1 SV=2	6	0	36.18	6.53751e+07	46111000
sp|P14324|FPPS_HUMAN	sp|P14324|FPPS_HUMAN	>sp|P14324|FPPS_HUMAN Farnesyl pyrophosphate synthase OS=Homo sapiens OX=9606 GN=FDPS PE=1 SV=4	6	0	28.686	2.53803e+08	287910000
sp|P17174|AATC_HUMAN	sp|P17174|AATC_HUMAN	>sp|P17174|AATC_HUMAN Aspartate aminotransferase, cytoplasmic OS=Homo sapiens OX=9606 GN=GOT1 PE=1 SV=3	6	0	43.04	1.05964e+07	5572300
sp|P22061|PIMT_HUMAN	sp|P22061|PIMT_HUMAN	>sp|P22061|PIMT_HUMAN Protein-L-isoaspartate(D-aspartate) O-methyltransferase OS=Homo sapiens OX=9606 GN=PCMT1 PE=1 SV=4	6	0	32.043	5.48379e+07	43903000
sp|P22087|FBRL_HUMAN	sp|P22087|FBRL_HUMAN	>sp|P22087|FBRL_HUMAN rRNA 2-O-methyltransferase fibrillarin OS=Homo sapiens OX=9606 GN=FBL PE=1 SV=2	6	0	50.04	1.17055e+08	89810000
sp|P23368|MAOM_HUMAN	sp|P23368|MAOM_HUMAN	>sp|P23368|MAOM_HUMAN NAD-dependent malic enzyme, mitochondrial OS=Homo sapiens OX=9606 GN=ME2 PE=1 SV=1	6	0	32.37	4.7779e+07	44099000
sp|P26368|U2AF2_HUMAN	sp|P26368|U2AF2_HUMAN	>sp|P26368|U2AF2_HUMAN Splicing factor U2AF 65 kDa subunit OS=Homo sapiens OX=9606 GN=U2AF2 PE=1 SV=4	6	0	54.77	9.9733e+07	92355000
sp|P28074|PSB5_HUMAN	sp|P28074|PSB5_HUMAN	>sp|P28074|PSB5_HUMAN Proteasome subunit beta type-5 OS=Homo sapiens OX=9606 GN=PSMB5 PE=1 SV=3	6	0	17.018	8.06359e+06	8777900
sp|P30040|ERP29_HUMAN	sp|P30040|ERP29_HUMAN	>sp|P30040|ERP29_HUMAN Endoplasmic reticulum resident protein 29 OS=Homo sapiens OX=9606 GN=ERP29 PE=1 SV=4	6	0	15.552	1.03275e+07	21159000
sp|P30048|PRDX3_HUMAN	sp|P30048|PRDX3_HUMAN	>sp|P30048|PRDX3_HUMAN Thioredoxin-dependent peroxide reductase, mitochondrial OS=Homo sapiens OX=9606 GN=PRDX3 PE=1 SV=3	6	0	34.334	7.2395e+07	63428000
sp|P30050|RL12_HUMAN	sp|P30050|RL12_HUMAN	>sp|P30050|RL12_HUMAN 60S ribosomal protein L12 OS=Homo sapiens OX=9606 GN=RPL12 PE=1 SV=1	6	0	210.99	1.01101e+09	792950000
sp|P30086|PEBP1_HUMAN	sp|P30086|PEBP1_HUMAN	>sp|P30086|PEBP1_HUMAN Phosphatidylethanolamine-binding protein 1 OS=Homo sapiens OX=9606 GN=PEBP1 PE=1 SV=3	6	0	132.05	5.22822e+07	88504000
sp|P35250|RFC2_HUMAN	sp|P35250|RFC2_HUMAN	>sp|P35250|RFC2_HUMAN Replication factor C subunit 2 OS=Homo sapiens OX=9606 GN=RFC2 PE=1 SV=3	6	0	38.49	6.13689e+07	46889000
sp|P35573|GDE_HUMAN	sp|P35573|GDE_HUMAN	>sp|P35573|GDE_HUMAN Glycogen debranching enzyme OS=Homo sapiens OX=9606 GN=AGL PE=1 SV=3	6	0	14.374	1.31331e+07	15855000
sp|P36915|GNL1_HUMAN	sp|P36915|GNL1_HUMAN	>sp|P36915|GNL1_HUMAN Guanine nucleotide-binding protein-like 1 OS=Homo sapiens OX=9606 GN=GNL1 PE=1 SV=2	6	0	33.204	2.67287e+07	32231000
sp|P37198|NUP62_HUMAN	sp|P37198|NUP62_HUMAN	>sp|P37198|NUP62_HUMAN Nuclear pore glycoprotein p62 OS=Homo sapiens OX=9606 GN=NUP62 PE=1 SV=3	6	0	59.49	5.38923e+07	58280000
sp|P40121|CAPG_HUMAN	sp|P40121|CAPG_HUMAN	>sp|P40121|CAPG_HUMAN Macrophage-capping protein OS=Homo sapiens OX=9606 GN=CAPG PE=1 SV=2	6	0	46.076	5.96521e+07	46879000
sp|P40429|RL13A_HUMAN;sp|Q6NVV1|R13P3_HUMAN	sp|P40429|RL13A_HUMAN;sp|Q6NVV1|R13P3_HUMAN	>sp|P40429|RL13A_HUMAN 60S ribosomal protein L13a OS=Homo sapiens OX=9606 GN=RPL13A PE=1 SV=2;>sp|Q6NVV1|R13P3_HUMAN Putative 60S ribosomal protein L13a protein RPL13AP3 OS=Homo sapiens OX=9606 GN=RPL13AP3 PE=5 SV=1	6	0	60.223	5.12081e+08	379570000
sp|P42330|AK1C3_HUMAN;sp|Q04828|AK1C1_HUMAN;sp|P17516|AK1C4_HUMAN;sp|P52895|AK1C2_HUMAN	sp|P42330|AK1C3_HUMAN;sp|Q04828|AK1C1_HUMAN	>sp|P42330|AK1C3_HUMAN Aldo-keto reductase family 1 member C3 OS=Homo sapiens OX=9606 GN=AKR1C3 PE=1 SV=4;>sp|Q04828|AK1C1_HUMAN Aldo-keto reductase family 1 member C1 OS=Homo sapiens OX=9606 GN=AKR1C1 PE=1 SV=1	6	0	58.807	1.75892e+07	65091000
sp|P42858|HD_HUMAN	sp|P42858|HD_HUMAN	>sp|P42858|HD_HUMAN Huntingtin OS=Homo sapiens OX=9606 GN=HTT PE=1 SV=2	6	0	30.151	9.08633e+06	4861500
sp|P43353|AL3B1_HUMAN;sp|P48448|AL3B2_HUMAN	sp|P43353|AL3B1_HUMAN	>sp|P43353|AL3B1_HUMAN Aldehyde dehydrogenase family 3 member B1 OS=Homo sapiens OX=9606 GN=ALDH3B1 PE=1 SV=1	6	0	29.246	1.81619e+07	12627000
sp|P45973|CBX5_HUMAN	sp|P45973|CBX5_HUMAN	>sp|P45973|CBX5_HUMAN Chromobox protein homolog 5 OS=Homo sapiens OX=9606 GN=CBX5 PE=1 SV=1	6	0	60.4	4.96542e+07	97060000
sp|P46087|NOP2_HUMAN	sp|P46087|NOP2_HUMAN	>sp|P46087|NOP2_HUMAN Probable 28S rRNA (cytosine(4447)-C(5))-methyltransferase OS=Homo sapiens OX=9606 GN=NOP2 PE=1 SV=2	6	0	24.211	7.04888e+07	56042000
sp|P46783|RS10_HUMAN;sp|Q9NQ39|RS10L_HUMAN	sp|P46783|RS10_HUMAN;sp|Q9NQ39|RS10L_HUMAN	>sp|P46783|RS10_HUMAN 40S ribosomal protein S10 OS=Homo sapiens OX=9606 GN=RPS10 PE=1 SV=1;>sp|Q9NQ39|RS10L_HUMAN Putative 40S ribosomal protein S10-like OS=Homo sapiens OX=9606 GN=RPS10P5 PE=5 SV=1	6	0	128.73	3.36843e+08	389700000
sp|P47755|CAZA2_HUMAN	sp|P47755|CAZA2_HUMAN	>sp|P47755|CAZA2_HUMAN F-actin-capping protein subunit alpha-2 OS=Homo sapiens OX=9606 GN=CAPZA2 PE=1 SV=3	6	0	34.843	3.73726e+07	55529000
sp|P47756|CAPZB_HUMAN	sp|P47756|CAPZB_HUMAN	>sp|P47756|CAPZB_HUMAN F-actin-capping protein subunit beta OS=Homo sapiens OX=9606 GN=CAPZB PE=1 SV=4	6	0	52.363	7.52697e+07	70955000
sp|P50502|F10A1_HUMAN;sp|Q8IZP2|ST134_HUMAN;sp|Q8NFI4|F10A5_HUMAN	sp|P50502|F10A1_HUMAN;sp|Q8IZP2|ST134_HUMAN;sp|Q8NFI4|F10A5_HUMAN	>sp|P50502|F10A1_HUMAN Hsc70-interacting protein OS=Homo sapiens OX=9606 GN=ST13 PE=1 SV=2;>sp|Q8IZP2|ST134_HUMAN Putative protein FAM10A4 OS=Homo sapiens OX=9606 GN=ST13P4 PE=5 SV=1;>sp|Q8NFI4|F10A5_HUMAN Putative protein FAM10A5 OS=Homo sapiens OX=9606 G	6	0	44.491	1.63728e+08	176160000
sp|P50748|KNTC1_HUMAN	sp|P50748|KNTC1_HUMAN	>sp|P50748|KNTC1_HUMAN Kinetochore-associated protein 1 OS=Homo sapiens OX=9606 GN=KNTC1 PE=1 SV=1	6	0	11.489	8.82754e+06	16895000
sp|P52732|KIF11_HUMAN	sp|P52732|KIF11_HUMAN	>sp|P52732|KIF11_HUMAN Kinesin-like protein KIF11 OS=Homo sapiens OX=9606 GN=KIF11 PE=1 SV=2	6	0	31.943	5.05218e+06	11082000
sp|P52735|VAV2_HUMAN	sp|P52735|VAV2_HUMAN	>sp|P52735|VAV2_HUMAN Guanine nucleotide exchange factor VAV2 OS=Homo sapiens OX=9606 GN=VAV2 PE=1 SV=2	6	0	37.153	2.61296e+07	21016000
sp|P59998|ARPC4_HUMAN	sp|P59998|ARPC4_HUMAN	>sp|P59998|ARPC4_HUMAN Actin-related protein 2/3 complex subunit 4 OS=Homo sapiens OX=9606 GN=ARPC4 PE=1 SV=3	6	0	54.226	2.85247e+08	272110000
sp|Q9UNX3|RL26L_HUMAN;sp|P61254|RL26_HUMAN	sp|Q9UNX3|RL26L_HUMAN;sp|P61254|RL26_HUMAN	>sp|Q9UNX3|RL26L_HUMAN 60S ribosomal protein L26-like 1 OS=Homo sapiens OX=9606 GN=RPL26L1 PE=1 SV=1;>sp|P61254|RL26_HUMAN 60S ribosomal protein L26 OS=Homo sapiens OX=9606 GN=RPL26 PE=1 SV=1	6	0	23.17	3.74174e+08	228840000
sp|P61619|S61A1_HUMAN;sp|Q9H9S3|S61A2_HUMAN	sp|P61619|S61A1_HUMAN	>sp|P61619|S61A1_HUMAN Protein transport protein Sec61 subunit alpha isoform 1 OS=Homo sapiens OX=9606 GN=SEC61A1 PE=1 SV=2	6	0	68.004	1.34877e+08	213720000
sp|P62244|RS15A_HUMAN	sp|P62244|RS15A_HUMAN	>sp|P62244|RS15A_HUMAN 40S ribosomal protein S15a OS=Homo sapiens OX=9606 GN=RPS15A PE=1 SV=2	6	0	177.75	1.05457e+09	953890000
sp|P62266|RS23_HUMAN	sp|P62266|RS23_HUMAN	>sp|P62266|RS23_HUMAN 40S ribosomal protein S23 OS=Homo sapiens OX=9606 GN=RPS23 PE=1 SV=3	6	0	53.733	2.946e+08	228700000
sp|P62277|RS13_HUMAN	sp|P62277|RS13_HUMAN	>sp|P62277|RS13_HUMAN 40S ribosomal protein S13 OS=Homo sapiens OX=9606 GN=RPS13 PE=1 SV=2	6	0	50.511	1.46789e+09	798770000
sp|P62495|ERF1_HUMAN	sp|P62495|ERF1_HUMAN	>sp|P62495|ERF1_HUMAN Eukaryotic peptide chain release factor subunit 1 OS=Homo sapiens OX=9606 GN=ETF1 PE=1 SV=3	6	0	22.575	2.99844e+07	32950000
sp|P62750|RL23A_HUMAN	sp|P62750|RL23A_HUMAN	>sp|P62750|RL23A_HUMAN 60S ribosomal protein L23a OS=Homo sapiens OX=9606 GN=RPL23A PE=1 SV=1	6	0	53.273	5.86812e+08	423830000
sp|P62829|RL23_HUMAN	sp|P62829|RL23_HUMAN	>sp|P62829|RL23_HUMAN 60S ribosomal protein L23 OS=Homo sapiens OX=9606 GN=RPL23 PE=1 SV=1	6	0	66.138	3.97424e+08	338880000
sp|P62888|RL30_HUMAN	sp|P62888|RL30_HUMAN	>sp|P62888|RL30_HUMAN 60S ribosomal protein L30 OS=Homo sapiens OX=9606 GN=RPL30 PE=1 SV=2	6	0	99.223	3.66933e+08	427980000
sp|P62910|RL32_HUMAN	sp|P62910|RL32_HUMAN	>sp|P62910|RL32_HUMAN 60S ribosomal protein L32 OS=Homo sapiens OX=9606 GN=RPL32 PE=1 SV=2	6	0	23.09	2.36853e+08	151330000
sp|P78406|RAE1L_HUMAN	sp|P78406|RAE1L_HUMAN	>sp|P78406|RAE1L_HUMAN mRNA export factor OS=Homo sapiens OX=9606 GN=RAE1 PE=1 SV=1	6	0	42.593	4.53909e+07	33260000
sp|P82650|RT22_HUMAN	sp|P82650|RT22_HUMAN	>sp|P82650|RT22_HUMAN 28S ribosomal protein S22, mitochondrial OS=Homo sapiens OX=9606 GN=MRPS22 PE=1 SV=1	6	0	70.231	8.9353e+07	59663000
sp|P82930|RT34_HUMAN	sp|P82930|RT34_HUMAN	>sp|P82930|RT34_HUMAN 28S ribosomal protein S34, mitochondrial OS=Homo sapiens OX=9606 GN=MRPS34 PE=1 SV=2	6	0	33.001	4.30223e+07	35867000
sp|Q01105|SET_HUMAN;sp|P0DME0|SETLP_HUMAN	sp|Q01105|SET_HUMAN;sp|P0DME0|SETLP_HUMAN	>sp|Q01105|SET_HUMAN Protein SET OS=Homo sapiens OX=9606 GN=SET PE=1 SV=3;>sp|P0DME0|SETLP_HUMAN Protein SETSIP OS=Homo sapiens OX=9606 GN=SETSIP PE=1 SV=1	6	0	34.723	6.09512e+07	35843000
sp|Q01581|HMCS1_HUMAN	sp|Q01581|HMCS1_HUMAN	>sp|Q01581|HMCS1_HUMAN Hydroxymethylglutaryl-CoA synthase, cytoplasmic OS=Homo sapiens OX=9606 GN=HMGCS1 PE=1 SV=2	6	0	50.7	2.65278e+07	49525000
sp|Q02543|RL18A_HUMAN	sp|Q02543|RL18A_HUMAN	>sp|Q02543|RL18A_HUMAN 60S ribosomal protein L18a OS=Homo sapiens OX=9606 GN=RPL18A PE=1 SV=2	6	0	47.954	4.26986e+08	330580000
sp|Q02978|M2OM_HUMAN	sp|Q02978|M2OM_HUMAN	>sp|Q02978|M2OM_HUMAN Mitochondrial 2-oxoglutarate/malate carrier protein OS=Homo sapiens OX=9606 GN=SLC25A11 PE=1 SV=3	6	0	15.025	2.96505e+07	24498000
sp|Q04323|UBXN1_HUMAN	sp|Q04323|UBXN1_HUMAN	>sp|Q04323|UBXN1_HUMAN UBX domain-containing protein 1 OS=Homo sapiens OX=9606 GN=UBXN1 PE=1 SV=2	6	0	62.775	1.95573e+07	23358000
sp|Q04837|SSBP_HUMAN	sp|Q04837|SSBP_HUMAN	>sp|Q04837|SSBP_HUMAN Single-stranded DNA-binding protein, mitochondrial OS=Homo sapiens OX=9606 GN=SSBP1 PE=1 SV=1	6	0	24.541	1.41912e+08	65194000
sp|Q05209|PTN12_HUMAN	sp|Q05209|PTN12_HUMAN	>sp|Q05209|PTN12_HUMAN Tyrosine-protein phosphatase non-receptor type 12 OS=Homo sapiens OX=9606 GN=PTPN12 PE=1 SV=3	6	0	54.71	1.92245e+07	20478000
sp|Q07021|C1QBP_HUMAN	sp|Q07021|C1QBP_HUMAN	>sp|Q07021|C1QBP_HUMAN Complement component 1 Q subcomponent-binding protein, mitochondrial OS=Homo sapiens OX=9606 GN=C1QBP PE=1 SV=1	6	0	62.71	1.39731e+08	123770000
sp|Q07666|KHDR1_HUMAN;sp|O75525|KHDR3_HUMAN;sp|Q5VWX1|KHDR2_HUMAN	sp|Q07666|KHDR1_HUMAN	>sp|Q07666|KHDR1_HUMAN KH domain-containing, RNA-binding, signal transduction-associated protein 1 OS=Homo sapiens OX=9606 GN=KHDRBS1 PE=1 SV=1	6	0	96.172	2.44702e+08	158000000
sp|Q07955|SRSF1_HUMAN	sp|Q07955|SRSF1_HUMAN	>sp|Q07955|SRSF1_HUMAN Serine/arginine-rich splicing factor 1 OS=Homo sapiens OX=9606 GN=SRSF1 PE=1 SV=2	6	0	18.305	1.56452e+07	13254000
sp|Q08209|PP2BA_HUMAN;sp|P16298|PP2BB_HUMAN;sp|P48454|PP2BC_HUMAN	sp|Q08209|PP2BA_HUMAN	>sp|Q08209|PP2BA_HUMAN Serine/threonine-protein phosphatase 2B catalytic subunit alpha isoform OS=Homo sapiens OX=9606 GN=PPP3CA PE=1 SV=1	6	0	23.391	1.94759e+07	45841000
sp|Q09028|RBBP4_HUMAN	sp|Q09028|RBBP4_HUMAN	>sp|Q09028|RBBP4_HUMAN Histone-binding protein RBBP4 OS=Homo sapiens OX=9606 GN=RBBP4 PE=1 SV=3	6	0	30.353	5.41585e+07	48857000
sp|Q10713|MPPA_HUMAN	sp|Q10713|MPPA_HUMAN	>sp|Q10713|MPPA_HUMAN Mitochondrial-processing peptidase subunit alpha OS=Homo sapiens OX=9606 GN=PMPCA PE=1 SV=2	6	0	34.86	9.89802e+07	69226000
sp|Q12849|GRSF1_HUMAN	sp|Q12849|GRSF1_HUMAN	>sp|Q12849|GRSF1_HUMAN G-rich sequence factor 1 OS=Homo sapiens OX=9606 GN=GRSF1 PE=1 SV=3	6	0	110.45	6.51112e+07	49008000
sp|Q13136|LIPA1_HUMAN	sp|Q13136|LIPA1_HUMAN	>sp|Q13136|LIPA1_HUMAN Liprin-alpha-1 OS=Homo sapiens OX=9606 GN=PPFIA1 PE=1 SV=1	6	0	48.525	4.77756e+06	20648000
sp|Q13155|AIMP2_HUMAN	sp|Q13155|AIMP2_HUMAN	>sp|Q13155|AIMP2_HUMAN Aminoacyl tRNA synthase complex-interacting multifunctional protein 2 OS=Homo sapiens OX=9606 GN=AIMP2 PE=1 SV=2	6	0	91.174	1.49911e+08	122460000
sp|Q13162|PRDX4_HUMAN	sp|Q13162|PRDX4_HUMAN	>sp|Q13162|PRDX4_HUMAN Peroxiredoxin-4 OS=Homo sapiens OX=9606 GN=PRDX4 PE=1 SV=1	6	0	23.523	2.26559e+07	15078000
sp|Q13283|G3BP1_HUMAN	sp|Q13283|G3BP1_HUMAN	>sp|Q13283|G3BP1_HUMAN Ras GTPase-activating protein-binding protein 1 OS=Homo sapiens OX=9606 GN=G3BP1 PE=1 SV=1	6	0	24.7	5.48655e+07	67913000
sp|Q13505|MTX1_HUMAN	sp|Q13505|MTX1_HUMAN	>sp|Q13505|MTX1_HUMAN Metaxin-1 OS=Homo sapiens OX=9606 GN=MTX1 PE=1 SV=3	6	0	31.178	2.34913e+07	16131000
sp|Q13554|KCC2B_HUMAN	sp|Q13554|KCC2B_HUMAN	>sp|Q13554|KCC2B_HUMAN Calcium/calmodulin-dependent protein kinase type II subunit beta OS=Homo sapiens OX=9606 GN=CAMK2B PE=1 SV=3	6	0.0026649	3.2978	5.43181e+06	1312900
sp|Q13555|KCC2G_HUMAN	sp|Q13555|KCC2G_HUMAN	>sp|Q13555|KCC2G_HUMAN Calcium/calmodulin-dependent protein kinase type II subunit gamma OS=Homo sapiens OX=9606 GN=CAMK2G PE=1 SV=4	6	0.0010508	3.9467	9.52379e+06	6821200
sp|Q14019|COTL1_HUMAN	sp|Q14019|COTL1_HUMAN	>sp|Q14019|COTL1_HUMAN Coactosin-like protein OS=Homo sapiens OX=9606 GN=COTL1 PE=1 SV=3	6	0	33.281	1.67698e+08	150440000
sp|Q14165|MLEC_HUMAN	sp|Q14165|MLEC_HUMAN	>sp|Q14165|MLEC_HUMAN Malectin OS=Homo sapiens OX=9606 GN=MLEC PE=1 SV=1	6	0	51.733	4.42628e+07	31154000
sp|Q14444|CAPR1_HUMAN	sp|Q14444|CAPR1_HUMAN	>sp|Q14444|CAPR1_HUMAN Caprin-1 OS=Homo sapiens OX=9606 GN=CAPRIN1 PE=1 SV=2	6	0	53.041	5.89612e+07	40411000
sp|Q14498|RBM39_HUMAN;sp|Q86U06|RBM23_HUMAN	sp|Q14498|RBM39_HUMAN	>sp|Q14498|RBM39_HUMAN RNA-binding protein 39 OS=Homo sapiens OX=9606 GN=RBM39 PE=1 SV=2	6	0	78.013	4.33987e+07	44336000
sp|Q14558|KPRA_HUMAN	sp|Q14558|KPRA_HUMAN	>sp|Q14558|KPRA_HUMAN Phosphoribosyl pyrophosphate synthase-associated protein 1 OS=Homo sapiens OX=9606 GN=PRPSAP1 PE=1 SV=2	6	0	32.962	3.47102e+07	31485000
sp|Q15185|TEBP_HUMAN	sp|Q15185|TEBP_HUMAN	>sp|Q15185|TEBP_HUMAN Prostaglandin E synthase 3 OS=Homo sapiens OX=9606 GN=PTGES3 PE=1 SV=1	6	0	79.762	1.744e+08	167010000
sp|Q15334|L2GL1_HUMAN	sp|Q15334|L2GL1_HUMAN	>sp|Q15334|L2GL1_HUMAN Lethal(2) giant larvae protein homolog 1 OS=Homo sapiens OX=9606 GN=LLGL1 PE=1 SV=3	6	0	15.718	4.00764e+07	57077000
sp|Q15424|SAFB1_HUMAN	sp|Q15424|SAFB1_HUMAN	>sp|Q15424|SAFB1_HUMAN Scaffold attachment factor B1 OS=Homo sapiens OX=9606 GN=SAFB PE=1 SV=4	6	0	112.26	7.03098e+07	71437000
sp|Q15654|TRIP6_HUMAN	sp|Q15654|TRIP6_HUMAN	>sp|Q15654|TRIP6_HUMAN Thyroid receptor-interacting protein 6 OS=Homo sapiens OX=9606 GN=TRIP6 PE=1 SV=3	6	0	73.343	1.08032e+08	105070000
sp|Q16181|SEPT7_HUMAN;sp|Q6ZU15|SEP14_HUMAN	sp|Q16181|SEPT7_HUMAN	>sp|Q16181|SEPT7_HUMAN Septin-7 OS=Homo sapiens OX=9606 GN=SEPTIN7 PE=1 SV=2	6	0	19.915	3.4304e+07	36924000
sp|Q16512|PKN1_HUMAN	sp|Q16512|PKN1_HUMAN	>sp|Q16512|PKN1_HUMAN Serine/threonine-protein kinase N1 OS=Homo sapiens OX=9606 GN=PKN1 PE=1 SV=2	6	0	50.031	3.93901e+07	33721000
sp|Q2TAY7|SMU1_HUMAN	sp|Q2TAY7|SMU1_HUMAN	>sp|Q2TAY7|SMU1_HUMAN WD40 repeat-containing protein SMU1 OS=Homo sapiens OX=9606 GN=SMU1 PE=1 SV=2	6	0	14.274	2.40766e+07	29849000
sp|Q3V6T2|GRDN_HUMAN	sp|Q3V6T2|GRDN_HUMAN	>sp|Q3V6T2|GRDN_HUMAN Girdin OS=Homo sapiens OX=9606 GN=CCDC88A PE=1 SV=2	6	0	31.354	4.51809e+06	3407200
sp|Q52LW3|RHG29_HUMAN	sp|Q52LW3|RHG29_HUMAN	>sp|Q52LW3|RHG29_HUMAN Rho GTPase-activating protein 29 OS=Homo sapiens OX=9606 GN=ARHGAP29 PE=1 SV=2	6	0	32.064	2.73725e+07	12486000
sp|Q53EZ4|CEP55_HUMAN	sp|Q53EZ4|CEP55_HUMAN	>sp|Q53EZ4|CEP55_HUMAN Centrosomal protein of 55 kDa OS=Homo sapiens OX=9606 GN=CEP55 PE=1 SV=3	6	0	32.733	1.70533e+07	7176100
sp|Q58FF6|H90B4_HUMAN	sp|Q58FF6|H90B4_HUMAN	>sp|Q58FF6|H90B4_HUMAN Putative heat shock protein HSP 90-beta 4 OS=Homo sapiens OX=9606 GN=HSP90AB4P PE=5 SV=1	6	0	13.373	4.02083e+07	37487000
sp|Q5JTZ9|SYAM_HUMAN	sp|Q5JTZ9|SYAM_HUMAN	>sp|Q5JTZ9|SYAM_HUMAN Alanine--tRNA ligase, mitochondrial OS=Homo sapiens OX=9606 GN=AARS2 PE=1 SV=1	6	0	29.42	2.68343e+07	33795000
sp|Q66K74|MAP1S_HUMAN	sp|Q66K74|MAP1S_HUMAN	>sp|Q66K74|MAP1S_HUMAN Microtubule-associated protein 1S OS=Homo sapiens OX=9606 GN=MAP1S PE=1 SV=2	6	0	41.83	4.37728e+07	46030000
sp|Q6PIU2|NCEH1_HUMAN	sp|Q6PIU2|NCEH1_HUMAN	>sp|Q6PIU2|NCEH1_HUMAN Neutral cholesterol ester hydrolase 1 OS=Homo sapiens OX=9606 GN=NCEH1 PE=1 SV=3	6	0	14.292	4.48722e+06	4418600
sp|Q6ZS17|RIPR1_HUMAN	sp|Q6ZS17|RIPR1_HUMAN	>sp|Q6ZS17|RIPR1_HUMAN Rho family-interacting cell polarization regulator 1 OS=Homo sapiens OX=9606 GN=RIPOR1 PE=1 SV=1	6	0	18.114	4.16899e+07	15861000
sp|Q709C8|VP13C_HUMAN	sp|Q709C8|VP13C_HUMAN	>sp|Q709C8|VP13C_HUMAN Vacuolar protein sorting-associated protein 13C OS=Homo sapiens OX=9606 GN=VPS13C PE=1 SV=1	6	0	32.251	4.20479e+06	8129600
sp|Q70J99|UN13D_HUMAN	sp|Q70J99|UN13D_HUMAN	>sp|Q70J99|UN13D_HUMAN Protein unc-13 homolog D OS=Homo sapiens OX=9606 GN=UNC13D PE=1 SV=1	6	0	57.007	1.11933e+07	16192000
sp|Q86SQ0|PHLB2_HUMAN	sp|Q86SQ0|PHLB2_HUMAN	>sp|Q86SQ0|PHLB2_HUMAN Pleckstrin homology-like domain family B member 2 OS=Homo sapiens OX=9606 GN=PHLDB2 PE=1 SV=2	6	0	23.496	1.58759e+07	18470000
sp|Q86TX2|ACOT1_HUMAN;sp|P49753|ACOT2_HUMAN	sp|Q86TX2|ACOT1_HUMAN;sp|P49753|ACOT2_HUMAN	>sp|Q86TX2|ACOT1_HUMAN Acyl-coenzyme A thioesterase 1 OS=Homo sapiens OX=9606 GN=ACOT1 PE=1 SV=1;>sp|P49753|ACOT2_HUMAN Acyl-coenzyme A thioesterase 2, mitochondrial OS=Homo sapiens OX=9606 GN=ACOT2 PE=1 SV=6	6	0	80.377	3.77548e+07	56236000
sp|Q86VI3|IQGA3_HUMAN	sp|Q86VI3|IQGA3_HUMAN	>sp|Q86VI3|IQGA3_HUMAN Ras GTPase-activating-like protein IQGAP3 OS=Homo sapiens OX=9606 GN=IQGAP3 PE=1 SV=2	6	0	21.652	1.41625e+07	11377000
sp|Q86YR5|GPSM1_HUMAN	sp|Q86YR5|GPSM1_HUMAN	>sp|Q86YR5|GPSM1_HUMAN G-protein-signaling modulator 1 OS=Homo sapiens OX=9606 GN=GPSM1 PE=1 SV=2	6	0	26.242	8.15035e+06	27546000
sp|Q8IX01|SUGP2_HUMAN	sp|Q8IX01|SUGP2_HUMAN	>sp|Q8IX01|SUGP2_HUMAN SURP and G-patch domain-containing protein 2 OS=Homo sapiens OX=9606 GN=SUGP2 PE=1 SV=2	6	0	40.458	1.84958e+07	16426000
sp|Q8IXI2|MIRO1_HUMAN	sp|Q8IXI2|MIRO1_HUMAN	>sp|Q8IXI2|MIRO1_HUMAN Mitochondrial Rho GTPase 1 OS=Homo sapiens OX=9606 GN=RHOT1 PE=1 SV=2	6	0	16.262	1.34452e+07	41636000
sp|Q8IYB8|SUV3_HUMAN	sp|Q8IYB8|SUV3_HUMAN	>sp|Q8IYB8|SUV3_HUMAN ATP-dependent RNA helicase SUPV3L1, mitochondrial OS=Homo sapiens OX=9606 GN=SUPV3L1 PE=1 SV=1	6	0	17.934	2.25503e+07	38909000
sp|Q8IYI6|EXOC8_HUMAN	sp|Q8IYI6|EXOC8_HUMAN	>sp|Q8IYI6|EXOC8_HUMAN Exocyst complex component 8 OS=Homo sapiens OX=9606 GN=EXOC8 PE=1 SV=2	6	0	19.613	1.23137e+07	51638000
sp|Q8N2K0|ABD12_HUMAN	sp|Q8N2K0|ABD12_HUMAN	>sp|Q8N2K0|ABD12_HUMAN Lysophosphatidylserine lipase ABHD12 OS=Homo sapiens OX=9606 GN=ABHD12 PE=1 SV=2	6	0	15.489	1.04407e+07	17893000
sp|Q8NB90|AFG2H_HUMAN	sp|Q8NB90|AFG2H_HUMAN	>sp|Q8NB90|AFG2H_HUMAN ATPase family protein 2 homolog OS=Homo sapiens OX=9606 GN=SPATA5 PE=1 SV=3	6	0	17.321	1.03839e+07	15326000
sp|Q8NCA5|FA98A_HUMAN	sp|Q8NCA5|FA98A_HUMAN	>sp|Q8NCA5|FA98A_HUMAN Protein FAM98A OS=Homo sapiens OX=9606 GN=FAM98A PE=1 SV=2	6	0	66.934	1.1904e+08	43165000
sp|Q8NCN5|PDPR_HUMAN	sp|Q8NCN5|PDPR_HUMAN	>sp|Q8NCN5|PDPR_HUMAN Pyruvate dehydrogenase phosphatase regulatory subunit, mitochondrial OS=Homo sapiens OX=9606 GN=PDPR PE=1 SV=2	6	0	18.131	4.39977e+07	29548000
sp|Q8TAQ2|SMRC2_HUMAN	sp|Q8TAQ2|SMRC2_HUMAN	>sp|Q8TAQ2|SMRC2_HUMAN SWI/SNF complex subunit SMARCC2 OS=Homo sapiens OX=9606 GN=SMARCC2 PE=1 SV=1	6	0	21.908	2.20247e+07	25203000
sp|Q8TCG1|CIP2A_HUMAN	sp|Q8TCG1|CIP2A_HUMAN	>sp|Q8TCG1|CIP2A_HUMAN Protein CIP2A OS=Homo sapiens OX=9606 GN=CIP2A PE=1 SV=2	6	0	24.322	2.21062e+07	18730000
sp|Q8TDN6|BRX1_HUMAN	sp|Q8TDN6|BRX1_HUMAN	>sp|Q8TDN6|BRX1_HUMAN Ribosome biogenesis protein BRX1 homolog OS=Homo sapiens OX=9606 GN=BRIX1 PE=1 SV=2	6	0	16.66	4.65052e+07	41789000
sp|Q8TF05|PP4R1_HUMAN	sp|Q8TF05|PP4R1_HUMAN	>sp|Q8TF05|PP4R1_HUMAN Serine/threonine-protein phosphatase 4 regulatory subunit 1 OS=Homo sapiens OX=9606 GN=PPP4R1 PE=1 SV=1	6	0	42.213	2.52816e+07	17625000
sp|Q92597|NDRG1_HUMAN	sp|Q92597|NDRG1_HUMAN	>sp|Q92597|NDRG1_HUMAN Protein NDRG1 OS=Homo sapiens OX=9606 GN=NDRG1 PE=1 SV=1	6	0	56.325	5.00639e+07	70961000
sp|Q92922|SMRC1_HUMAN	sp|Q92922|SMRC1_HUMAN	>sp|Q92922|SMRC1_HUMAN SWI/SNF complex subunit SMARCC1 OS=Homo sapiens OX=9606 GN=SMARCC1 PE=1 SV=3	6	0	9.2381	6.09144e+06	5024900
sp|Q969X5|ERGI1_HUMAN	sp|Q969X5|ERGI1_HUMAN	>sp|Q969X5|ERGI1_HUMAN Endoplasmic reticulum-Golgi intermediate compartment protein 1 OS=Homo sapiens OX=9606 GN=ERGIC1 PE=1 SV=1	6	0	42.472	3.74266e+07	43543000
sp|Q96EY7|PTCD3_HUMAN	sp|Q96EY7|PTCD3_HUMAN	>sp|Q96EY7|PTCD3_HUMAN Pentatricopeptide repeat domain-containing protein 3, mitochondrial OS=Homo sapiens OX=9606 GN=PTCD3 PE=1 SV=3	6	0	22.348	3.68252e+07	28835000
sp|Q96G23|CERS2_HUMAN	sp|Q96G23|CERS2_HUMAN	>sp|Q96G23|CERS2_HUMAN Ceramide synthase 2 OS=Homo sapiens OX=9606 GN=CERS2 PE=1 SV=1	6	0	42.613	1.08296e+08	109600000
sp|Q96J84|KIRR1_HUMAN	sp|Q96J84|KIRR1_HUMAN	>sp|Q96J84|KIRR1_HUMAN Kin of IRRE-like protein 1 OS=Homo sapiens OX=9606 GN=KIRREL1 PE=1 SV=2	6	0	12.419	1.04446e+07	18754000
sp|Q96JH7|VCIP1_HUMAN	sp|Q96JH7|VCIP1_HUMAN	>sp|Q96JH7|VCIP1_HUMAN Deubiquitinating protein VCIP135 OS=Homo sapiens OX=9606 GN=VCPIP1 PE=1 SV=2	6	0	22.284	2.59563e+07	9370400
sp|Q96KG9|SCYL1_HUMAN	sp|Q96KG9|SCYL1_HUMAN	>sp|Q96KG9|SCYL1_HUMAN N-terminal kinase-like protein OS=Homo sapiens OX=9606 GN=SCYL1 PE=1 SV=1	6	0	36.373	3.69434e+07	27357000
sp|Q96PK6|RBM14_HUMAN	sp|Q96PK6|RBM14_HUMAN	>sp|Q96PK6|RBM14_HUMAN RNA-binding protein 14 OS=Homo sapiens OX=9606 GN=RBM14 PE=1 SV=2	6	0	51.564	5.23901e+07	81710000
sp|Q96Q06|PLIN4_HUMAN	sp|Q96Q06|PLIN4_HUMAN	>sp|Q96Q06|PLIN4_HUMAN Perilipin-4 OS=Homo sapiens OX=9606 GN=PLIN4 PE=1 SV=2	6	0	16.561	1.0172e+07	5786600
sp|Q96SB3|NEB2_HUMAN	sp|Q96SB3|NEB2_HUMAN	>sp|Q96SB3|NEB2_HUMAN Neurabin-2 OS=Homo sapiens OX=9606 GN=PPP1R9B PE=1 SV=3	6	0	45.878	1.38699e+07	36855000
sp|Q99569|PKP4_HUMAN;sp|Q9UQB3|CTND2_HUMAN	sp|Q99569|PKP4_HUMAN	>sp|Q99569|PKP4_HUMAN Plakophilin-4 OS=Homo sapiens OX=9606 GN=PKP4 PE=1 SV=2	6	0	10.594	2.56798e+06	6640800
sp|Q99615|DNJC7_HUMAN	sp|Q99615|DNJC7_HUMAN	>sp|Q99615|DNJC7_HUMAN DnaJ homolog subfamily C member 7 OS=Homo sapiens OX=9606 GN=DNAJC7 PE=1 SV=2	6	0	27.66	5.56263e+07	48543000
sp|Q99805|TM9S2_HUMAN	sp|Q99805|TM9S2_HUMAN	>sp|Q99805|TM9S2_HUMAN Transmembrane 9 superfamily member 2 OS=Homo sapiens OX=9606 GN=TM9SF2 PE=1 SV=1	6	0	53.862	1.47432e+08	135220000
sp|Q9BQE5|APOL2_HUMAN	sp|Q9BQE5|APOL2_HUMAN	>sp|Q9BQE5|APOL2_HUMAN Apolipoprotein L2 OS=Homo sapiens OX=9606 GN=APOL2 PE=1 SV=1	6	0	103.68	3.53414e+07	37500000
sp|Q9BQG0|MBB1A_HUMAN	sp|Q9BQG0|MBB1A_HUMAN	>sp|Q9BQG0|MBB1A_HUMAN Myb-binding protein 1A OS=Homo sapiens OX=9606 GN=MYBBP1A PE=1 SV=2	6	0	11.962	1.87058e+07	14774000
sp|Q9BQS8|FYCO1_HUMAN	sp|Q9BQS8|FYCO1_HUMAN	>sp|Q9BQS8|FYCO1_HUMAN FYVE and coiled-coil domain-containing protein 1 OS=Homo sapiens OX=9606 GN=FYCO1 PE=1 SV=3	6	0	55.017	1.14584e+07	11278000
sp|Q9BTT6|LRRC1_HUMAN	sp|Q9BTT6|LRRC1_HUMAN	>sp|Q9BTT6|LRRC1_HUMAN Leucine-rich repeat-containing protein 1 OS=Homo sapiens OX=9606 GN=LRRC1 PE=1 SV=1	6	0	57.698	1.68639e+07	18697000
sp|Q9BZH6|WDR11_HUMAN	sp|Q9BZH6|WDR11_HUMAN	>sp|Q9BZH6|WDR11_HUMAN WD repeat-containing protein 11 OS=Homo sapiens OX=9606 GN=WDR11 PE=1 SV=1	6	0	19.721	5.24475e+06	17164000
sp|Q9BZV1|UBXN6_HUMAN	sp|Q9BZV1|UBXN6_HUMAN	>sp|Q9BZV1|UBXN6_HUMAN UBX domain-containing protein 6 OS=Homo sapiens OX=9606 GN=UBXN6 PE=1 SV=1	6	0	30.386	4.56101e+07	58976000
sp|Q9BZX2|UCK2_HUMAN;sp|Q9HA47|UCK1_HUMAN	sp|Q9BZX2|UCK2_HUMAN	>sp|Q9BZX2|UCK2_HUMAN Uridine-cytidine kinase 2 OS=Homo sapiens OX=9606 GN=UCK2 PE=1 SV=1	6	0	27.894	6.48105e+07	50050000
sp|Q9C0D5|TANC1_HUMAN	sp|Q9C0D5|TANC1_HUMAN	>sp|Q9C0D5|TANC1_HUMAN Protein TANC1 OS=Homo sapiens OX=9606 GN=TANC1 PE=1 SV=3	6	0	13.786	9.82263e+06	13231000
sp|Q9GZS3|WDR61_HUMAN	sp|Q9GZS3|WDR61_HUMAN	>sp|Q9GZS3|WDR61_HUMAN WD repeat-containing protein 61 OS=Homo sapiens OX=9606 GN=WDR61 PE=1 SV=1	6	0	46.204	4.9427e+07	52354000
sp|Q9GZT8|NIF3L_HUMAN	sp|Q9GZT8|NIF3L_HUMAN	>sp|Q9GZT8|NIF3L_HUMAN NIF3-like protein 1 OS=Homo sapiens OX=9606 GN=NIF3L1 PE=1 SV=2	6	0	28.528	3.77123e+07	29967000
sp|Q9H269|VPS16_HUMAN	sp|Q9H269|VPS16_HUMAN	>sp|Q9H269|VPS16_HUMAN Vacuolar protein sorting-associated protein 16 homolog OS=Homo sapiens OX=9606 GN=VPS16 PE=1 SV=2	6	0	24.306	2.33134e+07	22276000
sp|Q9H9A6|LRC40_HUMAN	sp|Q9H9A6|LRC40_HUMAN	>sp|Q9H9A6|LRC40_HUMAN Leucine-rich repeat-containing protein 40 OS=Homo sapiens OX=9606 GN=LRRC40 PE=1 SV=1	6	0	25.989	5.92171e+07	35996000
sp|Q9HD45|TM9S3_HUMAN	sp|Q9HD45|TM9S3_HUMAN	>sp|Q9HD45|TM9S3_HUMAN Transmembrane 9 superfamily member 3 OS=Homo sapiens OX=9606 GN=TM9SF3 PE=1 SV=2	6	0	71.665	6.91714e+07	42024000
sp|Q9HDC9|APMAP_HUMAN	sp|Q9HDC9|APMAP_HUMAN	>sp|Q9HDC9|APMAP_HUMAN Adipocyte plasma membrane-associated protein OS=Homo sapiens OX=9606 GN=APMAP PE=1 SV=2	6	0	24.503	3.53976e+07	42043000
sp|Q9NP81|SYSM_HUMAN	sp|Q9NP81|SYSM_HUMAN	>sp|Q9NP81|SYSM_HUMAN Serine--tRNA ligase, mitochondrial OS=Homo sapiens OX=9606 GN=SARS2 PE=1 SV=1	6	0	31.969	0	1019400
sp|Q9NR09|BIRC6_HUMAN	sp|Q9NR09|BIRC6_HUMAN	>sp|Q9NR09|BIRC6_HUMAN Baculoviral IAP repeat-containing protein 6 OS=Homo sapiens OX=9606 GN=BIRC6 PE=1 SV=2	6	0	22.113	4.20904e+06	14008000
sp|Q9NRL3|STRN4_HUMAN	sp|Q9NRL3|STRN4_HUMAN	>sp|Q9NRL3|STRN4_HUMAN Striatin-4 OS=Homo sapiens OX=9606 GN=STRN4 PE=1 SV=2	6	0	18.965	2.54193e+07	9109000
sp|Q9NTK5|OLA1_HUMAN	sp|Q9NTK5|OLA1_HUMAN	>sp|Q9NTK5|OLA1_HUMAN Obg-like ATPase 1 OS=Homo sapiens OX=9606 GN=OLA1 PE=1 SV=2	6	0	35.916	2.38448e+07	30612000
sp|Q9NX63|MIC19_HUMAN	sp|Q9NX63|MIC19_HUMAN	>sp|Q9NX63|MIC19_HUMAN MICOS complex subunit MIC19 OS=Homo sapiens OX=9606 GN=CHCHD3 PE=1 SV=1	6	0	41.292	9.73426e+07	98578000
sp|Q9NYL2|M3K20_HUMAN	sp|Q9NYL2|M3K20_HUMAN	>sp|Q9NYL2|M3K20_HUMAN Mitogen-activated protein kinase kinase kinase 20 OS=Homo sapiens OX=9606 GN=MAP3K20 PE=1 SV=3	6	0	23.307	4.18035e+07	42141000
sp|Q9NYU2|UGGG1_HUMAN	sp|Q9NYU2|UGGG1_HUMAN	>sp|Q9NYU2|UGGG1_HUMAN UDP-glucose:glycoprotein glucosyltransferase 1 OS=Homo sapiens OX=9606 GN=UGGT1 PE=1 SV=3	6	0	23.579	1.64542e+07	8067500
sp|Q9NZL4|HPBP1_HUMAN	sp|Q9NZL4|HPBP1_HUMAN	>sp|Q9NZL4|HPBP1_HUMAN Hsp70-binding protein 1 OS=Homo sapiens OX=9606 GN=HSPBP1 PE=1 SV=2	6	0	30.083	5.2949e+07	54685000
sp|Q9NZL9|MAT2B_HUMAN	sp|Q9NZL9|MAT2B_HUMAN	>sp|Q9NZL9|MAT2B_HUMAN Methionine adenosyltransferase 2 subunit beta OS=Homo sapiens OX=9606 GN=MAT2B PE=1 SV=1	6	0	81.669	2.94898e+07	43777000
sp|Q9P2R3|ANFY1_HUMAN	sp|Q9P2R3|ANFY1_HUMAN	>sp|Q9P2R3|ANFY1_HUMAN Rabankyrin-5 OS=Homo sapiens OX=9606 GN=ANKFY1 PE=1 SV=2	6	0	66.487	3.84388e+07	34102000
sp|Q9P2W9|STX18_HUMAN	sp|Q9P2W9|STX18_HUMAN	>sp|Q9P2W9|STX18_HUMAN Syntaxin-18 OS=Homo sapiens OX=9606 GN=STX18 PE=1 SV=1	6	0	24.781	2.74126e+07	19822000
sp|Q9UEW8|STK39_HUMAN	sp|Q9UEW8|STK39_HUMAN	>sp|Q9UEW8|STK39_HUMAN STE20/SPS1-related proline-alanine-rich protein kinase OS=Homo sapiens OX=9606 GN=STK39 PE=1 SV=3	6	0	57.984	3.34559e+07	26396000
sp|Q9UGP8|SEC63_HUMAN	sp|Q9UGP8|SEC63_HUMAN	>sp|Q9UGP8|SEC63_HUMAN Translocation protein SEC63 homolog OS=Homo sapiens OX=9606 GN=SEC63 PE=1 SV=2	6	0	27.039	5.05666e+07	39058000
sp|Q9UHQ9|NB5R1_HUMAN	sp|Q9UHQ9|NB5R1_HUMAN	>sp|Q9UHQ9|NB5R1_HUMAN NADH-cytochrome b5 reductase 1 OS=Homo sapiens OX=9606 GN=CYB5R1 PE=1 SV=1	6	0	16.26	4.30452e+07	93805000
sp|Q9UJW0|DCTN4_HUMAN	sp|Q9UJW0|DCTN4_HUMAN	>sp|Q9UJW0|DCTN4_HUMAN Dynactin subunit 4 OS=Homo sapiens OX=9606 GN=DCTN4 PE=1 SV=1	6	0	29.883	2.40008e+07	25600000
sp|Q9UL25|RAB21_HUMAN	sp|Q9UL25|RAB21_HUMAN	>sp|Q9UL25|RAB21_HUMAN Ras-related protein Rab-21 OS=Homo sapiens OX=9606 GN=RAB21 PE=1 SV=3	6	0	73.856	6.36939e+07	76089000
sp|Q9UL46|PSME2_HUMAN	sp|Q9UL46|PSME2_HUMAN	>sp|Q9UL46|PSME2_HUMAN Proteasome activator complex subunit 2 OS=Homo sapiens OX=9606 GN=PSME2 PE=1 SV=4	6	0	91.27	3.89506e+07	35198000
sp|Q9Y295|DRG1_HUMAN	sp|Q9Y295|DRG1_HUMAN	>sp|Q9Y295|DRG1_HUMAN Developmentally-regulated GTP-binding protein 1 OS=Homo sapiens OX=9606 GN=DRG1 PE=1 SV=1	6	0	21.213	5.62621e+07	51645000
sp|Q9Y2Q3|GSTK1_HUMAN	sp|Q9Y2Q3|GSTK1_HUMAN	>sp|Q9Y2Q3|GSTK1_HUMAN Glutathione S-transferase kappa 1 OS=Homo sapiens OX=9606 GN=GSTK1 PE=1 SV=3	6	0	53.816	4.40103e+07	96261000
sp|Q9Y316|MEMO1_HUMAN	sp|Q9Y316|MEMO1_HUMAN	>sp|Q9Y316|MEMO1_HUMAN Protein MEMO1 OS=Homo sapiens OX=9606 GN=MEMO1 PE=1 SV=1	6	0	55.114	4.18988e+07	33845000
sp|Q9Y394|DHRS7_HUMAN	sp|Q9Y394|DHRS7_HUMAN	>sp|Q9Y394|DHRS7_HUMAN Dehydrogenase/reductase SDR family member 7 OS=Homo sapiens OX=9606 GN=DHRS7 PE=1 SV=1	6	0	39.444	6.00147e+07	49202000
sp|Q9Y487|VPP2_HUMAN	sp|Q9Y487|VPP2_HUMAN	>sp|Q9Y487|VPP2_HUMAN V-type proton ATPase 116 kDa subunit a isoform 2 OS=Homo sapiens OX=9606 GN=ATP6V0A2 PE=1 SV=2	6	0	13.981	0	5300100
sp|Q9Y4I1|MYO5A_HUMAN	sp|Q9Y4I1|MYO5A_HUMAN	>sp|Q9Y4I1|MYO5A_HUMAN Unconventional myosin-Va OS=Homo sapiens OX=9606 GN=MYO5A PE=1 SV=2	6	0	21.743	3.95336e+06	3997100
sp|Q9Y4J8|DTNA_HUMAN;sp|O60941|DTNB_HUMAN	sp|Q9Y4J8|DTNA_HUMAN;sp|O60941|DTNB_HUMAN	>sp|Q9Y4J8|DTNA_HUMAN Dystrobrevin alpha OS=Homo sapiens OX=9606 GN=DTNA PE=1 SV=2;>sp|O60941|DTNB_HUMAN Dystrobrevin beta OS=Homo sapiens OX=9606 GN=DTNB PE=1 SV=1	6	0	37.296	2.58037e+07	43574000
sp|Q9Y5A9|YTHD2_HUMAN	sp|Q9Y5A9|YTHD2_HUMAN	>sp|Q9Y5A9|YTHD2_HUMAN YTH domain-containing family protein 2 OS=Homo sapiens OX=9606 GN=YTHDF2 PE=1 SV=2	6	0	15.599	4.67451e+07	47373000
sp|Q9Y676|RT18B_HUMAN	sp|Q9Y676|RT18B_HUMAN	>sp|Q9Y676|RT18B_HUMAN 28S ribosomal protein S18b, mitochondrial OS=Homo sapiens OX=9606 GN=MRPS18B PE=1 SV=1	6	0	81.664	5.59591e+07	56176000
sp|A6NHL2|TBAL3_HUMAN	sp|A6NHL2|TBAL3_HUMAN	>sp|A6NHL2|TBAL3_HUMAN Tubulin alpha chain-like 3 OS=Homo sapiens OX=9606 GN=TUBAL3 PE=1 SV=2	5	0	6.0474	2.96596e+07	30190000
sp|O00170|AIP_HUMAN	sp|O00170|AIP_HUMAN	>sp|O00170|AIP_HUMAN AH receptor-interacting protein OS=Homo sapiens OX=9606 GN=AIP PE=1 SV=2	5	0	18.87	3.57281e+07	66968000
sp|O00186|STXB3_HUMAN	sp|O00186|STXB3_HUMAN	>sp|O00186|STXB3_HUMAN Syntaxin-binding protein 3 OS=Homo sapiens OX=9606 GN=STXBP3 PE=1 SV=2	5	0	34.761	3.86786e+07	23900000
sp|O00567|NOP56_HUMAN	sp|O00567|NOP56_HUMAN	>sp|O00567|NOP56_HUMAN Nucleolar protein 56 OS=Homo sapiens OX=9606 GN=NOP56 PE=1 SV=4	5	0	11.644	1.98156e+07	10892000
sp|O00743|PPP6_HUMAN	sp|O00743|PPP6_HUMAN	>sp|O00743|PPP6_HUMAN Serine/threonine-protein phosphatase 6 catalytic subunit OS=Homo sapiens OX=9606 GN=PPP6C PE=1 SV=1	5	0	31.82	6.55714e+07	65875000
sp|P47813|IF1AX_HUMAN;sp|O14602|IF1AY_HUMAN	sp|P47813|IF1AX_HUMAN;sp|O14602|IF1AY_HUMAN	>sp|P47813|IF1AX_HUMAN Eukaryotic translation initiation factor 1A, X-chromosomal OS=Homo sapiens OX=9606 GN=EIF1AX PE=1 SV=2;>sp|O14602|IF1AY_HUMAN Eukaryotic translation initiation factor 1A, Y-chromosomal OS=Homo sapiens OX=9606 GN=EIF1AY PE=1 SV=4	5	0	22.99	6.98347e+07	65606000
sp|O14745|NHRF1_HUMAN	sp|O14745|NHRF1_HUMAN	>sp|O14745|NHRF1_HUMAN Na(+)/H(+) exchange regulatory cofactor NHE-RF1 OS=Homo sapiens OX=9606 GN=SLC9A3R1 PE=1 SV=4	5	0	45.395	1.96319e+07	21395000
sp|O15042|SR140_HUMAN	sp|O15042|SR140_HUMAN	>sp|O15042|SR140_HUMAN U2 snRNP-associated SURP motif-containing protein OS=Homo sapiens OX=9606 GN=U2SURP PE=1 SV=2	5	0	22.131	1.23665e+07	14515000
sp|O15084|ANR28_HUMAN;sp|Q8N8A2|ANR44_HUMAN	sp|O15084|ANR28_HUMAN	>sp|O15084|ANR28_HUMAN Serine/threonine-protein phosphatase 6 regulatory ankyrin repeat subunit A OS=Homo sapiens OX=9606 GN=ANKRD28 PE=1 SV=5	5	0	25.291	2.15381e+07	16267000
sp|O15118|NPC1_HUMAN	sp|O15118|NPC1_HUMAN	>sp|O15118|NPC1_HUMAN NPC intracellular cholesterol transporter 1 OS=Homo sapiens OX=9606 GN=NPC1 PE=1 SV=2	5	0	20.797	4.06628e+07	35532000
sp|O15344|TRI18_HUMAN;sp|Q9UJV3|TRIM1_HUMAN	sp|O15344|TRI18_HUMAN	>sp|O15344|TRI18_HUMAN E3 ubiquitin-protein ligase Midline-1 OS=Homo sapiens OX=9606 GN=MID1 PE=1 SV=1	5	0	18.978	1.91981e+07	19897000
sp|O43290|SNUT1_HUMAN	sp|O43290|SNUT1_HUMAN	>sp|O43290|SNUT1_HUMAN U4/U6.U5 tri-snRNP-associated protein 1 OS=Homo sapiens OX=9606 GN=SART1 PE=1 SV=1	5	0	29.421	3.98113e+07	15410000
sp|O43432|IF4G3_HUMAN	sp|O43432|IF4G3_HUMAN	>sp|O43432|IF4G3_HUMAN Eukaryotic translation initiation factor 4 gamma 3 OS=Homo sapiens OX=9606 GN=EIF4G3 PE=1 SV=2	5	0	13.959	1.97616e+06	3963500
sp|O43813|LANC1_HUMAN	sp|O43813|LANC1_HUMAN	>sp|O43813|LANC1_HUMAN Glutathione S-transferase LANCL1 OS=Homo sapiens OX=9606 GN=LANCL1 PE=1 SV=1	5	0	16.761	1.16194e+08	126550000
sp|O43815|STRN_HUMAN	sp|O43815|STRN_HUMAN	>sp|O43815|STRN_HUMAN Striatin OS=Homo sapiens OX=9606 GN=STRN PE=1 SV=4	5	0	7.3832	2.9344e+07	13491000
sp|O60502|OGA_HUMAN	sp|O60502|OGA_HUMAN	>sp|O60502|OGA_HUMAN Protein O-GlcNAcase OS=Homo sapiens OX=9606 GN=OGA PE=1 SV=2	5	0	23.115	3.52966e+07	36282000
sp|Q99880|H2B1L_HUMAN;sp|Q99879|H2B1M_HUMAN;sp|Q99877|H2B1N_HUMAN;sp|Q93079|H2B1H_HUMAN;sp|Q5QNW6|H2B2F_HUMAN;sp|P62807|H2B1C_HUMAN;sp|P58876|H2B1D_HUMAN;sp|P57053|H2BFS_HUMAN;sp|O60814|H2B1K_HUMAN;sp|Q96A08|H2B1A_HUMAN	sp|Q99880|H2B1L_HUMAN;sp|Q99879|H2B1M_HUMAN;sp|Q99877|H2B1N_HUMAN;sp|Q93079|H2B1H_HUMAN;sp|Q5QNW6|H2B2F_HUMAN;sp|P62807|H2B1C_HUMAN;sp|P58876|H2B1D_HUMAN;sp|P57053|H2BFS_HUMAN;sp|O60814|H2B1K_HUMAN	>sp|Q99880|H2B1L_HUMAN Histone H2B type 1-L OS=Homo sapiens OX=9606 GN=HIST1H2BL PE=1 SV=3;>sp|Q99879|H2B1M_HUMAN Histone H2B type 1-M OS=Homo sapiens OX=9606 GN=HIST1H2BM PE=1 SV=3;>sp|Q99877|H2B1N_HUMAN Histone H2B type 1-N OS=Homo sapiens OX=9606 GN=HIS	5	0	92.901	1.1554e+09	878140000
sp|O75400|PR40A_HUMAN	sp|O75400|PR40A_HUMAN	>sp|O75400|PR40A_HUMAN Pre-mRNA-processing factor 40 homolog A OS=Homo sapiens OX=9606 GN=PRPF40A PE=1 SV=2	5	0	9.9344	4.0859e+07	23363000
sp|O75475|PSIP1_HUMAN	sp|O75475|PSIP1_HUMAN	>sp|O75475|PSIP1_HUMAN PC4 and SFRS1-interacting protein OS=Homo sapiens OX=9606 GN=PSIP1 PE=1 SV=1	5	0	33.979	6.84645e+07	51233000
sp|O75746|CMC1_HUMAN	sp|O75746|CMC1_HUMAN	>sp|O75746|CMC1_HUMAN Calcium-binding mitochondrial carrier protein Aralar1 OS=Homo sapiens OX=9606 GN=SLC25A12 PE=1 SV=2	5	0	6.9428	1.5286e+07	23238000
sp|O94822|LTN1_HUMAN	sp|O94822|LTN1_HUMAN	>sp|O94822|LTN1_HUMAN E3 ubiquitin-protein ligase listerin OS=Homo sapiens OX=9606 GN=LTN1 PE=1 SV=6	5	0	16.594	5.22845e+06	458100
sp|O95299|NDUAA_HUMAN	sp|O95299|NDUAA_HUMAN	>sp|O95299|NDUAA_HUMAN NADH dehydrogenase [ubiquinone] 1 alpha subcomplex subunit 10, mitochondrial OS=Homo sapiens OX=9606 GN=NDUFA10 PE=1 SV=1	5	0	39.248	1.85291e+07	31248000
sp|O95456|PSMG1_HUMAN	sp|O95456|PSMG1_HUMAN	>sp|O95456|PSMG1_HUMAN Proteasome assembly chaperone 1 OS=Homo sapiens OX=9606 GN=PSMG1 PE=1 SV=1	5	0	21.97	5.4038e+07	38723000
sp|O95714|HERC2_HUMAN;sp|Q9BVR0|HRC23_HUMAN	sp|O95714|HERC2_HUMAN	>sp|O95714|HERC2_HUMAN E3 ubiquitin-protein ligase HERC2 OS=Homo sapiens OX=9606 GN=HERC2 PE=1 SV=2	5	0	34.945	1.63211e+06	1223900
sp|O95757|HS74L_HUMAN	sp|O95757|HS74L_HUMAN	>sp|O95757|HS74L_HUMAN Heat shock 70 kDa protein 4L OS=Homo sapiens OX=9606 GN=HSPA4L PE=1 SV=3	5	0	13.256	3.64947e+07	22484000
sp|O95819|M4K4_HUMAN	sp|O95819|M4K4_HUMAN	>sp|O95819|M4K4_HUMAN Mitogen-activated protein kinase kinase kinase kinase 4 OS=Homo sapiens OX=9606 GN=MAP4K4 PE=1 SV=2	5	0	23.877	1.56096e+07	14374000
sp|O95861|BPNT1_HUMAN	sp|O95861|BPNT1_HUMAN	>sp|O95861|BPNT1_HUMAN 3(2),5-bisphosphate nucleotidase 1 OS=Homo sapiens OX=9606 GN=BPNT1 PE=1 SV=1	5	0	13.349	4.21696e+07	42379000
sp|P00403|COX2_HUMAN	sp|P00403|COX2_HUMAN	>sp|P00403|COX2_HUMAN Cytochrome c oxidase subunit 2 OS=Homo sapiens OX=9606 GN=MT-CO2 PE=1 SV=1	5	0	29.755	5.17669e+07	50927000
sp|P00441|SODC_HUMAN	sp|P00441|SODC_HUMAN	>sp|P00441|SODC_HUMAN Superoxide dismutase [Cu-Zn] OS=Homo sapiens OX=9606 GN=SOD1 PE=1 SV=2	5	0	65.832	4.87763e+07	21270000
sp|P00568|KAD1_HUMAN	sp|P00568|KAD1_HUMAN	>sp|P00568|KAD1_HUMAN Adenylate kinase isoenzyme 1 OS=Homo sapiens OX=9606 GN=AK1 PE=1 SV=3	5	0	23.324	2.39905e+07	38804000
sp|P01024|CO3_HUMAN	sp|P01024|CO3_HUMAN	>sp|P01024|CO3_HUMAN Complement C3 OS=Homo sapiens OX=9606 GN=C3 PE=1 SV=2	5	0	29.028	8.12189e+06	7519500
sp|P01031|CO5_HUMAN	sp|P01031|CO5_HUMAN	>sp|P01031|CO5_HUMAN Complement C5 OS=Homo sapiens OX=9606 GN=C5 PE=1 SV=4	5	0	41.889	0	0
sp|P04150|GCR_HUMAN	sp|P04150|GCR_HUMAN	>sp|P04150|GCR_HUMAN Glucocorticoid receptor OS=Homo sapiens OX=9606 GN=NR3C1 PE=1 SV=1	5	0	28.361	4.87706e+06	20165000
sp|P05387|RLA2_HUMAN	sp|P05387|RLA2_HUMAN	>sp|P05387|RLA2_HUMAN 60S acidic ribosomal protein P2 OS=Homo sapiens OX=9606 GN=RPLP2 PE=1 SV=1	5	0	32.051	8.8964e+07	90179000
sp|P06132|DCUP_HUMAN	sp|P06132|DCUP_HUMAN	>sp|P06132|DCUP_HUMAN Uroporphyrinogen decarboxylase OS=Homo sapiens OX=9606 GN=UROD PE=1 SV=2	5	0	34.492	5.55839e+07	49245000
sp|Q8N257|H2B3B_HUMAN;sp|Q16778|H2B2E_HUMAN;sp|P33778|H2B1B_HUMAN;sp|P23527|H2B1O_HUMAN;sp|P06899|H2B1J_HUMAN;sp|Q6DRA6|H2B2D_HUMAN;sp|Q6DN03|H2B2C_HUMAN	sp|Q8N257|H2B3B_HUMAN;sp|Q16778|H2B2E_HUMAN;sp|P33778|H2B1B_HUMAN;sp|P23527|H2B1O_HUMAN;sp|P06899|H2B1J_HUMAN	>sp|Q8N257|H2B3B_HUMAN Histone H2B type 3-B OS=Homo sapiens OX=9606 GN=HIST3H2BB PE=1 SV=3;>sp|Q16778|H2B2E_HUMAN Histone H2B type 2-E OS=Homo sapiens OX=9606 GN=HIST2H2BE PE=1 SV=3;>sp|P33778|H2B1B_HUMAN Histone H2B type 1-B OS=Homo sapiens OX=9606 GN=HIS	5	0	12.117	1.08983e+08	95648000
sp|P62987|RL40_HUMAN;sp|P62979|RS27A_HUMAN;sp|P0CG47|UBB_HUMAN;sp|P0CG48|UBC_HUMAN	sp|P62987|RL40_HUMAN;sp|P62979|RS27A_HUMAN;sp|P0CG47|UBB_HUMAN;sp|P0CG48|UBC_HUMAN	>sp|P62987|RL40_HUMAN Ubiquitin-60S ribosomal protein L40 OS=Homo sapiens OX=9606 GN=UBA52 PE=1 SV=2;>sp|P62979|RS27A_HUMAN Ubiquitin-40S ribosomal protein S27a OS=Homo sapiens OX=9606 GN=RPS27A PE=1 SV=2;>sp|P0CG47|UBB_HUMAN Polyubiquitin-B OS=Homo sapien	5	0	119.37	1.64439e+09	1638400000
sp|P10599|THIO_HUMAN	sp|P10599|THIO_HUMAN	>sp|P10599|THIO_HUMAN Thioredoxin OS=Homo sapiens OX=9606 GN=TXN PE=1 SV=3	5	0	28.666	4.29672e+07	28997000
sp|P10644|KAP0_HUMAN	sp|P10644|KAP0_HUMAN	>sp|P10644|KAP0_HUMAN cAMP-dependent protein kinase type I-alpha regulatory subunit OS=Homo sapiens OX=9606 GN=PRKAR1A PE=1 SV=1	5	0	18.728	3.41192e+07	28493000
sp|P12081|SYHC_HUMAN;sp|P49590|SYHM_HUMAN	sp|P12081|SYHC_HUMAN	>sp|P12081|SYHC_HUMAN Histidine--tRNA ligase, cytoplasmic OS=Homo sapiens OX=9606 GN=HARS PE=1 SV=2	5	0	10.495	7.31432e+06	4626600
sp|P13861|KAP2_HUMAN;sp|P31323|KAP3_HUMAN	sp|P13861|KAP2_HUMAN	>sp|P13861|KAP2_HUMAN cAMP-dependent protein kinase type II-alpha regulatory subunit OS=Homo sapiens OX=9606 GN=PRKAR2A PE=1 SV=2	5	0	43.761	3.34387e+07	42983000
sp|P15374|UCHL3_HUMAN	sp|P15374|UCHL3_HUMAN	>sp|P15374|UCHL3_HUMAN Ubiquitin carboxyl-terminal hydrolase isozyme L3 OS=Homo sapiens OX=9606 GN=UCHL3 PE=1 SV=1	5	0	20.801	4.323e+07	58737000
sp|P16070|CD44_HUMAN	sp|P16070|CD44_HUMAN	>sp|P16070|CD44_HUMAN CD44 antigen OS=Homo sapiens OX=9606 GN=CD44 PE=1 SV=3	5	0	29.652	3.74599e+07	35537000
sp|P16144|ITB4_HUMAN	sp|P16144|ITB4_HUMAN	>sp|P16144|ITB4_HUMAN Integrin beta-4 OS=Homo sapiens OX=9606 GN=ITGB4 PE=1 SV=5	5	0	9.0184	2.6887e+06	12233000
sp|P16401|H15_HUMAN	sp|P16401|H15_HUMAN	>sp|P16401|H15_HUMAN Histone H1.5 OS=Homo sapiens OX=9606 GN=HIST1H1B PE=1 SV=3	5	0	13.058	2.81586e+08	240240000
sp|P17066|HSP76_HUMAN;sp|P48741|HSP77_HUMAN	sp|P17066|HSP76_HUMAN;sp|P48741|HSP77_HUMAN	>sp|P17066|HSP76_HUMAN Heat shock 70 kDa protein 6 OS=Homo sapiens OX=9606 GN=HSPA6 PE=1 SV=2;>sp|P48741|HSP77_HUMAN Putative heat shock 70 kDa protein 7 OS=Homo sapiens OX=9606 GN=HSPA7 PE=5 SV=2	5	0	10.026	2.13063e+08	204800000
sp|P21291|CSRP1_HUMAN	sp|P21291|CSRP1_HUMAN	>sp|P21291|CSRP1_HUMAN Cysteine and glycine-rich protein 1 OS=Homo sapiens OX=9606 GN=CSRP1 PE=1 SV=3	5	0	113.25	1.34349e+08	224710000
sp|P22307|NLTP_HUMAN	sp|P22307|NLTP_HUMAN	>sp|P22307|NLTP_HUMAN Non-specific lipid-transfer protein OS=Homo sapiens OX=9606 GN=SCP2 PE=1 SV=2	5	0	12.964	1.26821e+07	26306000
sp|P23229|ITA6_HUMAN	sp|P23229|ITA6_HUMAN	>sp|P23229|ITA6_HUMAN Integrin alpha-6 OS=Homo sapiens OX=9606 GN=ITGA6 PE=1 SV=5	5	0	9.2825	7.27186e+07	22771000
sp|P24539|AT5F1_HUMAN	sp|P24539|AT5F1_HUMAN	>sp|P24539|AT5F1_HUMAN ATP synthase F(0) complex subunit B1, mitochondrial OS=Homo sapiens OX=9606 GN=ATP5PB PE=1 SV=2	5	0	30.003	2.70982e+07	30066000
sp|P25398|RS12_HUMAN	sp|P25398|RS12_HUMAN	>sp|P25398|RS12_HUMAN 40S ribosomal protein S12 OS=Homo sapiens OX=9606 GN=RPS12 PE=1 SV=3	5	0	42.452	4.29924e+08	330330000
sp|P26232|CTNA2_HUMAN	sp|P26232|CTNA2_HUMAN	>sp|P26232|CTNA2_HUMAN Catenin alpha-2 OS=Homo sapiens OX=9606 GN=CTNNA2 PE=1 SV=5	5	0	20.341	1.2347e+07	10171000
sp|P28066|PSA5_HUMAN	sp|P28066|PSA5_HUMAN	>sp|P28066|PSA5_HUMAN Proteasome subunit alpha type-5 OS=Homo sapiens OX=9606 GN=PSMA5 PE=1 SV=3	5	0	46.89	1.1655e+08	90455000
sp|P28070|PSB4_HUMAN	sp|P28070|PSB4_HUMAN	>sp|P28070|PSB4_HUMAN Proteasome subunit beta type-4 OS=Homo sapiens OX=9606 GN=PSMB4 PE=1 SV=4	5	0	29.582	2.90399e+07	14596000
sp|P28370|SMCA1_HUMAN	sp|P28370|SMCA1_HUMAN	>sp|P28370|SMCA1_HUMAN Probable global transcription activator SNF2L1 OS=Homo sapiens OX=9606 GN=SMARCA1 PE=1 SV=2	5	0	13.645	0	3287500
sp|P29373|RABP2_HUMAN	sp|P29373|RABP2_HUMAN	>sp|P29373|RABP2_HUMAN Cellular retinoic acid-binding protein 2 OS=Homo sapiens OX=9606 GN=CRABP2 PE=1 SV=2	5	0	57.158	5.97359e+07	32881000
sp|P29590|PML_HUMAN	sp|P29590|PML_HUMAN	>sp|P29590|PML_HUMAN Protein PML OS=Homo sapiens OX=9606 GN=PML PE=1 SV=3	5	0	51.77	1.72759e+07	26042000
sp|P30530|UFO_HUMAN;sp|Q12866|MERTK_HUMAN	sp|P30530|UFO_HUMAN	>sp|P30530|UFO_HUMAN Tyrosine-protein kinase receptor UFO OS=Homo sapiens OX=9606 GN=AXL PE=1 SV=4	5	0	12.614	2.988e+07	21975000
sp|P31942|HNRH3_HUMAN	sp|P31942|HNRH3_HUMAN	>sp|P31942|HNRH3_HUMAN Heterogeneous nuclear ribonucleoprotein H3 OS=Homo sapiens OX=9606 GN=HNRNPH3 PE=1 SV=2	5	0	52.248	5.11576e+07	96991000
sp|P35659|DEK_HUMAN	sp|P35659|DEK_HUMAN	>sp|P35659|DEK_HUMAN Protein DEK OS=Homo sapiens OX=9606 GN=DEK PE=1 SV=1	5	0	22.83	9.32675e+07	226770000
sp|P35813|PPM1A_HUMAN;sp|O75688|PPM1B_HUMAN	sp|P35813|PPM1A_HUMAN	>sp|P35813|PPM1A_HUMAN Protein phosphatase 1A OS=Homo sapiens OX=9606 GN=PPM1A PE=1 SV=1	5	0	35.171	2.37151e+07	39542000
sp|P36542|ATPG_HUMAN	sp|P36542|ATPG_HUMAN	>sp|P36542|ATPG_HUMAN ATP synthase subunit gamma, mitochondrial OS=Homo sapiens OX=9606 GN=ATP5F1C PE=1 SV=1	5	0	15.577	8.26132e+07	70717000
sp|P42566|EPS15_HUMAN	sp|P42566|EPS15_HUMAN	>sp|P42566|EPS15_HUMAN Epidermal growth factor receptor substrate 15 OS=Homo sapiens OX=9606 GN=EPS15 PE=1 SV=2	5	0	37.841	1.12875e+07	26128000
sp|P42574|CASP3_HUMAN	sp|P42574|CASP3_HUMAN	>sp|P42574|CASP3_HUMAN Caspase-3 OS=Homo sapiens OX=9606 GN=CASP3 PE=1 SV=2	5	0	17.52	2.18617e+07	33440000
sp|P42677|RS27_HUMAN	sp|P42677|RS27_HUMAN	>sp|P42677|RS27_HUMAN 40S ribosomal protein S27 OS=Homo sapiens OX=9606 GN=RPS27 PE=1 SV=3	5	0	66.758	3.69147e+08	339210000
sp|P45985|MP2K4_HUMAN	sp|P45985|MP2K4_HUMAN	>sp|P45985|MP2K4_HUMAN Dual specificity mitogen-activated protein kinase kinase 4 OS=Homo sapiens OX=9606 GN=MAP2K4 PE=1 SV=1	5	0	16.129	3.05249e+07	18657000
sp|P46734|MP2K3_HUMAN	sp|P46734|MP2K3_HUMAN	>sp|P46734|MP2K3_HUMAN Dual specificity mitogen-activated protein kinase kinase 3 OS=Homo sapiens OX=9606 GN=MAP2K3 PE=1 SV=2	5	0	36.337	3.08899e+07	21151000
sp|P46776|RL27A_HUMAN	sp|P46776|RL27A_HUMAN	>sp|P46776|RL27A_HUMAN 60S ribosomal protein L27a OS=Homo sapiens OX=9606 GN=RPL27A PE=1 SV=2	5	0	25.486	3.63341e+08	474620000
sp|P47985|UCRI_HUMAN;sp|P0C7P4|UCRIL_HUMAN	sp|P47985|UCRI_HUMAN	>sp|P47985|UCRI_HUMAN Cytochrome b-c1 complex subunit Rieske, mitochondrial OS=Homo sapiens OX=9606 GN=UQCRFS1 PE=1 SV=2	5	0	71.282	4.63411e+07	49160000
sp|P48556|PSMD8_HUMAN	sp|P48556|PSMD8_HUMAN	>sp|P48556|PSMD8_HUMAN 26S proteasome non-ATPase regulatory subunit 8 OS=Homo sapiens OX=9606 GN=PSMD8 PE=1 SV=2	5	0	39.023	3.85432e+07	72679000
sp|P49207|RL34_HUMAN	sp|P49207|RL34_HUMAN	>sp|P49207|RL34_HUMAN 60S ribosomal protein L34 OS=Homo sapiens OX=9606 GN=RPL34 PE=1 SV=3	5	0	15.903	4.17645e+08	329790000
sp|P49321|NASP_HUMAN	sp|P49321|NASP_HUMAN	>sp|P49321|NASP_HUMAN Nuclear autoantigenic sperm protein OS=Homo sapiens OX=9606 GN=NASP PE=1 SV=2	5	0	13.049	1.54306e+07	18863000
sp|P49720|PSB3_HUMAN	sp|P49720|PSB3_HUMAN	>sp|P49720|PSB3_HUMAN Proteasome subunit beta type-3 OS=Homo sapiens OX=9606 GN=PSMB3 PE=1 SV=2	5	0	25.352	2.66001e+07	31034000
sp|P49756|RBM25_HUMAN	sp|P49756|RBM25_HUMAN	>sp|P49756|RBM25_HUMAN RNA-binding protein 25 OS=Homo sapiens OX=9606 GN=RBM25 PE=1 SV=3	5	0	16.918	3.18711e+07	33408000
sp|P50281|MMP14_HUMAN	sp|P50281|MMP14_HUMAN	>sp|P50281|MMP14_HUMAN Matrix metalloproteinase-14 OS=Homo sapiens OX=9606 GN=MMP14 PE=1 SV=3	5	0	14.238	9.10779e+06	20857000
sp|P50552|VASP_HUMAN	sp|P50552|VASP_HUMAN	>sp|P50552|VASP_HUMAN Vasodilator-stimulated phosphoprotein OS=Homo sapiens OX=9606 GN=VASP PE=1 SV=3	5	0	11.018	1.25983e+07	23293000
sp|P51148|RAB5C_HUMAN;sp|P61020|RAB5B_HUMAN	sp|P51148|RAB5C_HUMAN	>sp|P51148|RAB5C_HUMAN Ras-related protein Rab-5C OS=Homo sapiens OX=9606 GN=RAB5C PE=1 SV=2	5	0	31.902	2.64796e+07	26821000
sp|P51570|GALK1_HUMAN	sp|P51570|GALK1_HUMAN	>sp|P51570|GALK1_HUMAN Galactokinase OS=Homo sapiens OX=9606 GN=GALK1 PE=1 SV=1	5	0	86.872	1.05462e+08	95787000
sp|P51649|SSDH_HUMAN	sp|P51649|SSDH_HUMAN	>sp|P51649|SSDH_HUMAN Succinate-semialdehyde dehydrogenase, mitochondrial OS=Homo sapiens OX=9606 GN=ALDH5A1 PE=1 SV=2	5	0	55.855	3.10827e+07	45126000
sp|P51810|GP143_HUMAN	sp|P51810|GP143_HUMAN	>sp|P51810|GP143_HUMAN G-protein coupled receptor 143 OS=Homo sapiens OX=9606 GN=GPR143 PE=1 SV=2	5	0	28.073	2.66667e+07	30200000
sp|P51858|HDGF_HUMAN	sp|P51858|HDGF_HUMAN	>sp|P51858|HDGF_HUMAN Hepatoma-derived growth factor OS=Homo sapiens OX=9606 GN=HDGF PE=1 SV=1	5	0	35.504	3.55043e+06	7707000
sp|P52565|GDIR1_HUMAN	sp|P52565|GDIR1_HUMAN	>sp|P52565|GDIR1_HUMAN Rho GDP-dissociation inhibitor 1 OS=Homo sapiens OX=9606 GN=ARHGDIA PE=1 SV=3	5	0	42.855	1.07764e+08	128320000
sp|P52594|AGFG1_HUMAN	sp|P52594|AGFG1_HUMAN	>sp|P52594|AGFG1_HUMAN Arf-GAP domain and FG repeat-containing protein 1 OS=Homo sapiens OX=9606 GN=AGFG1 PE=1 SV=2	5	0	88.178	4.87419e+07	74822000
sp|P53680|AP2S1_HUMAN	sp|P53680|AP2S1_HUMAN	>sp|P53680|AP2S1_HUMAN AP-2 complex subunit sigma OS=Homo sapiens OX=9606 GN=AP2S1 PE=1 SV=2	5	0	14.889	4.3619e+07	56181000
sp|P53990|IST1_HUMAN	sp|P53990|IST1_HUMAN	>sp|P53990|IST1_HUMAN IST1 homolog OS=Homo sapiens OX=9606 GN=IST1 PE=1 SV=1	5	0	79.905	9.03514e+07	110090000
sp|P55263|ADK_HUMAN	sp|P55263|ADK_HUMAN	>sp|P55263|ADK_HUMAN Adenosine kinase OS=Homo sapiens OX=9606 GN=ADK PE=1 SV=2	5	0	19.317	2.5689e+07	37980000
sp|P60953|CDC42_HUMAN	sp|P60953|CDC42_HUMAN	>sp|P60953|CDC42_HUMAN Cell division control protein 42 homolog OS=Homo sapiens OX=9606 GN=CDC42 PE=1 SV=2	5	0	37.925	1.64301e+08	182940000
sp|P60981|DEST_HUMAN	sp|P60981|DEST_HUMAN	>sp|P60981|DEST_HUMAN Destrin OS=Homo sapiens OX=9606 GN=DSTN PE=1 SV=3	5	0	43.522	1.86852e+08	246000000
sp|P61353|RL27_HUMAN	sp|P61353|RL27_HUMAN	>sp|P61353|RL27_HUMAN 60S ribosomal protein L27 OS=Homo sapiens OX=9606 GN=RPL27 PE=1 SV=2	5	0	57.773	1.19981e+09	895410000
sp|P62316|SMD2_HUMAN	sp|P62316|SMD2_HUMAN	>sp|P62316|SMD2_HUMAN Small nuclear ribonucleoprotein Sm D2 OS=Homo sapiens OX=9606 GN=SNRPD2 PE=1 SV=1	5	0	25.891	1.40328e+08	83085000
sp|P62753|RS6_HUMAN	sp|P62753|RS6_HUMAN	>sp|P62753|RS6_HUMAN 40S ribosomal protein S6 OS=Homo sapiens OX=9606 GN=RPS6 PE=1 SV=1	5	0	59.887	5.3991e+08	557220000
sp|P62899|RL31_HUMAN	sp|P62899|RL31_HUMAN	>sp|P62899|RL31_HUMAN 60S ribosomal protein L31 OS=Homo sapiens OX=9606 GN=RPL31 PE=1 SV=1	5	0	18.874	3.87842e+08	225210000
sp|P82909|RT36_HUMAN	sp|P82909|RT36_HUMAN	>sp|P82909|RT36_HUMAN 28S ribosomal protein S36, mitochondrial OS=Homo sapiens OX=9606 GN=MRPS36 PE=1 SV=2	5	0	31.873	1.51942e+07	3674300
sp|P83731|RL24_HUMAN	sp|P83731|RL24_HUMAN	>sp|P83731|RL24_HUMAN 60S ribosomal protein L24 OS=Homo sapiens OX=9606 GN=RPL24 PE=1 SV=1	5	0	33.43	6.31144e+08	475820000
sp|Q00535|CDK5_HUMAN	sp|Q00535|CDK5_HUMAN	>sp|Q00535|CDK5_HUMAN Cyclin-dependent-like kinase 5 OS=Homo sapiens OX=9606 GN=CDK5 PE=1 SV=3	5	0	13.407	2.30437e+07	8571400
sp|Q01085|TIAR_HUMAN	sp|Q01085|TIAR_HUMAN	>sp|Q01085|TIAR_HUMAN Nucleolysin TIAR OS=Homo sapiens OX=9606 GN=TIAL1 PE=1 SV=1	5	0	29.998	4.71593e+07	72309000
sp|Q01469|FABP5_HUMAN;sp|A8MUU1|FB5L3_HUMAN	sp|Q01469|FABP5_HUMAN	>sp|Q01469|FABP5_HUMAN Fatty acid-binding protein 5 OS=Homo sapiens OX=9606 GN=FABP5 PE=1 SV=3	5	0	52.555	1.39123e+08	123410000
sp|Q01518|CAP1_HUMAN	sp|Q01518|CAP1_HUMAN	>sp|Q01518|CAP1_HUMAN Adenylyl cyclase-associated protein 1 OS=Homo sapiens OX=9606 GN=CAP1 PE=1 SV=5	5	0	25.923	2.41466e+07	5913100
sp|Q03135|CAV1_HUMAN;sp|P56539|CAV3_HUMAN	sp|Q03135|CAV1_HUMAN	>sp|Q03135|CAV1_HUMAN Caveolin-1 OS=Homo sapiens OX=9606 GN=CAV1 PE=1 SV=4	5	0	54.752	2.17711e+08	189840000
sp|Q05048|CSTF1_HUMAN	sp|Q05048|CSTF1_HUMAN	>sp|Q05048|CSTF1_HUMAN Cleavage stimulation factor subunit 1 OS=Homo sapiens OX=9606 GN=CSTF1 PE=1 SV=1	5	0	34.373	7.52709e+07	50276000
sp|Q05086|UBE3A_HUMAN	sp|Q05086|UBE3A_HUMAN	>sp|Q05086|UBE3A_HUMAN Ubiquitin-protein ligase E3A OS=Homo sapiens OX=9606 GN=UBE3A PE=1 SV=4	5	0	16.51	4.80774e+06	10346000
sp|Q08380|LG3BP_HUMAN	sp|Q08380|LG3BP_HUMAN	>sp|Q08380|LG3BP_HUMAN Galectin-3-binding protein OS=Homo sapiens OX=9606 GN=LGALS3BP PE=1 SV=1	5	0	18.561	6.93539e+07	77038000
sp|Q08426|ECHP_HUMAN	sp|Q08426|ECHP_HUMAN	>sp|Q08426|ECHP_HUMAN Peroxisomal bifunctional enzyme OS=Homo sapiens OX=9606 GN=EHHADH PE=1 SV=3	5	0	16.32	2.59127e+07	32618000
sp|Q12965|MYO1E_HUMAN;sp|O00160|MYO1F_HUMAN	sp|Q12965|MYO1E_HUMAN	>sp|Q12965|MYO1E_HUMAN Unconventional myosin-Ie OS=Homo sapiens OX=9606 GN=MYO1E PE=1 SV=2	5	0	7.9452	2.76697e+06	10319000
sp|Q12979|ABR_HUMAN	sp|Q12979|ABR_HUMAN	>sp|Q12979|ABR_HUMAN Active breakpoint cluster region-related protein OS=Homo sapiens OX=9606 GN=ABR PE=1 SV=2	5	0	24.908	6.21814e+06	15118000
sp|Q13123|RED_HUMAN	sp|Q13123|RED_HUMAN	>sp|Q13123|RED_HUMAN Protein Red OS=Homo sapiens OX=9606 GN=IK PE=1 SV=3	5	0	11.261	1.46112e+07	14964000
sp|Q13137|CACO2_HUMAN	sp|Q13137|CACO2_HUMAN	>sp|Q13137|CACO2_HUMAN Calcium-binding and coiled-coil domain-containing protein 2 OS=Homo sapiens OX=9606 GN=CALCOCO2 PE=1 SV=1	5	0	22.625	0	0
sp|Q13144|EI2BE_HUMAN	sp|Q13144|EI2BE_HUMAN	>sp|Q13144|EI2BE_HUMAN Translation initiation factor eIF-2B subunit epsilon OS=Homo sapiens OX=9606 GN=EIF2B5 PE=1 SV=3	5	0	9.8056	4.55435e+07	14553000
sp|Q13151|ROA0_HUMAN	sp|Q13151|ROA0_HUMAN	>sp|Q13151|ROA0_HUMAN Heterogeneous nuclear ribonucleoprotein A0 OS=Homo sapiens OX=9606 GN=HNRNPA0 PE=1 SV=1	5	0	50.46	1.78153e+08	207500000
sp|Q13418|ILK_HUMAN	sp|Q13418|ILK_HUMAN	>sp|Q13418|ILK_HUMAN Integrin-linked protein kinase OS=Homo sapiens OX=9606 GN=ILK PE=1 SV=2	5	0	34.142	5.57744e+07	43838000
sp|Q13435|SF3B2_HUMAN	sp|Q13435|SF3B2_HUMAN	>sp|Q13435|SF3B2_HUMAN Splicing factor 3B subunit 2 OS=Homo sapiens OX=9606 GN=SF3B2 PE=1 SV=2	5	0	13.688	3.68631e+07	48186000
sp|Q13547|HDAC1_HUMAN	sp|Q13547|HDAC1_HUMAN	>sp|Q13547|HDAC1_HUMAN Histone deacetylase 1 OS=Homo sapiens OX=9606 GN=HDAC1 PE=1 SV=1	5	0	16.494	5.59075e+06	10867000
sp|Q13948|CASP_HUMAN	sp|Q13948|CASP_HUMAN	>sp|Q13948|CASP_HUMAN Protein CASP OS=Homo sapiens OX=9606 GN=CUX1 PE=1 SV=2	5	0.0010497	3.9429	3.77743e+06	3164500
sp|Q13951|PEBB_HUMAN	sp|Q13951|PEBB_HUMAN	>sp|Q13951|PEBB_HUMAN Core-binding factor subunit beta OS=Homo sapiens OX=9606 GN=CBFB PE=1 SV=2	5	0	101.18	1.07143e+08	105020000
sp|Q14116|IL18_HUMAN	sp|Q14116|IL18_HUMAN	>sp|Q14116|IL18_HUMAN Interleukin-18 OS=Homo sapiens OX=9606 GN=IL18 PE=1 SV=1	5	0	43.318	4.55114e+07	85318000
sp|Q14139|UBE4A_HUMAN	sp|Q14139|UBE4A_HUMAN	>sp|Q14139|UBE4A_HUMAN Ubiquitin conjugation factor E4 A OS=Homo sapiens OX=9606 GN=UBE4A PE=1 SV=2	5	0	13.951	3.30485e+07	11382000
sp|Q14192|FHL2_HUMAN	sp|Q14192|FHL2_HUMAN	>sp|Q14192|FHL2_HUMAN Four and a half LIM domains protein 2 OS=Homo sapiens OX=9606 GN=FHL2 PE=1 SV=3	5	0	19.859	9.6708e+06	18676000
sp|Q14232|EI2BA_HUMAN	sp|Q14232|EI2BA_HUMAN	>sp|Q14232|EI2BA_HUMAN Translation initiation factor eIF-2B subunit alpha OS=Homo sapiens OX=9606 GN=EIF2B1 PE=1 SV=1	5	0	9.6081	3.05536e+07	29494000
sp|Q14671|PUM1_HUMAN	sp|Q14671|PUM1_HUMAN	>sp|Q14671|PUM1_HUMAN Pumilio homolog 1 OS=Homo sapiens OX=9606 GN=PUM1 PE=1 SV=3	5	0	11.285	2.14899e+07	12767000
sp|Q14CX7|NAA25_HUMAN	sp|Q14CX7|NAA25_HUMAN	>sp|Q14CX7|NAA25_HUMAN N-alpha-acetyltransferase 25, NatB auxiliary subunit OS=Homo sapiens OX=9606 GN=NAA25 PE=1 SV=1	5	0	25.8	1.5877e+07	13638000
sp|Q15031|SYLM_HUMAN	sp|Q15031|SYLM_HUMAN	>sp|Q15031|SYLM_HUMAN Probable leucine--tRNA ligase, mitochondrial OS=Homo sapiens OX=9606 GN=LARS2 PE=1 SV=2	5	0	12.353	3.36269e+07	31191000
sp|Q15056|IF4H_HUMAN	sp|Q15056|IF4H_HUMAN	>sp|Q15056|IF4H_HUMAN Eukaryotic translation initiation factor 4H OS=Homo sapiens OX=9606 GN=EIF4H PE=1 SV=5	5	0	130.61	1.20853e+08	128470000
sp|Q15121|PEA15_HUMAN	sp|Q15121|PEA15_HUMAN	>sp|Q15121|PEA15_HUMAN Astrocytic phosphoprotein PEA-15 OS=Homo sapiens OX=9606 GN=PEA15 PE=1 SV=2	5	0	25.5	3.75574e+07	33337000
sp|Q15386|UBE3C_HUMAN	sp|Q15386|UBE3C_HUMAN	>sp|Q15386|UBE3C_HUMAN Ubiquitin-protein ligase E3C OS=Homo sapiens OX=9606 GN=UBE3C PE=1 SV=3	5	0	15.65	1.55339e+06	35006000
sp|Q15631|TSN_HUMAN	sp|Q15631|TSN_HUMAN	>sp|Q15631|TSN_HUMAN Translin OS=Homo sapiens OX=9606 GN=TSN PE=1 SV=1	5	0	38.772	2.69192e+07	21566000
sp|Q15758|AAAT_HUMAN	sp|Q15758|AAAT_HUMAN	>sp|Q15758|AAAT_HUMAN Neutral amino acid transporter B(0) OS=Homo sapiens OX=9606 GN=SLC1A5 PE=1 SV=2	5	0	27.802	3.27111e+07	26353000
sp|Q16795|NDUA9_HUMAN	sp|Q16795|NDUA9_HUMAN	>sp|Q16795|NDUA9_HUMAN NADH dehydrogenase [ubiquinone] 1 alpha subcomplex subunit 9, mitochondrial OS=Homo sapiens OX=9606 GN=NDUFA9 PE=1 SV=2	5	0	12.73	9.2875e+06	14640000
sp|Q2M2I8|AAK1_HUMAN	sp|Q2M2I8|AAK1_HUMAN	>sp|Q2M2I8|AAK1_HUMAN AP2-associated protein kinase 1 OS=Homo sapiens OX=9606 GN=AAK1 PE=1 SV=3	5	0	44.514	3.17517e+07	32982000
sp|Q3ZCQ8|TIM50_HUMAN	sp|Q3ZCQ8|TIM50_HUMAN	>sp|Q3ZCQ8|TIM50_HUMAN Mitochondrial import inner membrane translocase subunit TIM50 OS=Homo sapiens OX=9606 GN=TIMM50 PE=1 SV=2	5	0	96.771	4.88463e+07	47125000
sp|Q460N5|PAR14_HUMAN	sp|Q460N5|PAR14_HUMAN	>sp|Q460N5|PAR14_HUMAN Protein mono-ADP-ribosyltransferase PARP14 OS=Homo sapiens OX=9606 GN=PARP14 PE=1 SV=3	5	0	16.326	6.37134e+06	8262900
sp|Q4J6C6|PPCEL_HUMAN	sp|Q4J6C6|PPCEL_HUMAN	>sp|Q4J6C6|PPCEL_HUMAN Prolyl endopeptidase-like OS=Homo sapiens OX=9606 GN=PREPL PE=1 SV=1	5	0	31.394	3.93385e+07	24295000
sp|Q5BKZ1|ZN326_HUMAN	sp|Q5BKZ1|ZN326_HUMAN	>sp|Q5BKZ1|ZN326_HUMAN DBIRD complex subunit ZNF326 OS=Homo sapiens OX=9606 GN=ZNF326 PE=1 SV=2	5	0	15.318	2.35613e+07	20414000
sp|Q5JTV8|TOIP1_HUMAN	sp|Q5JTV8|TOIP1_HUMAN	>sp|Q5JTV8|TOIP1_HUMAN Torsin-1A-interacting protein 1 OS=Homo sapiens OX=9606 GN=TOR1AIP1 PE=1 SV=2	5	0	62.601	1.39261e+07	21031000
sp|Q5M775|CYTSB_HUMAN	sp|Q5M775|CYTSB_HUMAN	>sp|Q5M775|CYTSB_HUMAN Cytospin-B OS=Homo sapiens OX=9606 GN=SPECC1 PE=1 SV=1	5	0	14.099	9.95896e+06	11761000
sp|Q5W0V3|F16B1_HUMAN	sp|Q5W0V3|F16B1_HUMAN	>sp|Q5W0V3|F16B1_HUMAN Protein FAM160B1 OS=Homo sapiens OX=9606 GN=FAM160B1 PE=1 SV=1	5	0	37.493	1.51724e+07	24100000
sp|Q66K14|TBC9B_HUMAN	sp|Q66K14|TBC9B_HUMAN	>sp|Q66K14|TBC9B_HUMAN TBC1 domain family member 9B OS=Homo sapiens OX=9606 GN=TBC1D9B PE=1 SV=3	5	0	15.099	2.19076e+07	16903000
sp|Q69YQ0|CYTSA_HUMAN	sp|Q69YQ0|CYTSA_HUMAN	>sp|Q69YQ0|CYTSA_HUMAN Cytospin-A OS=Homo sapiens OX=9606 GN=SPECC1L PE=1 SV=2	5	0	58.578	4.61988e+06	13312000
sp|Q6AI08|HEAT6_HUMAN	sp|Q6AI08|HEAT6_HUMAN	>sp|Q6AI08|HEAT6_HUMAN HEAT repeat-containing protein 6 OS=Homo sapiens OX=9606 GN=HEATR6 PE=1 SV=1	5	0	25.649	5.36387e+06	11740000
sp|Q6NVY1|HIBCH_HUMAN	sp|Q6NVY1|HIBCH_HUMAN	>sp|Q6NVY1|HIBCH_HUMAN 3-hydroxyisobutyryl-CoA hydrolase, mitochondrial OS=Homo sapiens OX=9606 GN=HIBCH PE=1 SV=2	5	0	14.869	3.12066e+07	26661000
sp|Q6P158|DHX57_HUMAN	sp|Q6P158|DHX57_HUMAN	>sp|Q6P158|DHX57_HUMAN Putative ATP-dependent RNA helicase DHX57 OS=Homo sapiens OX=9606 GN=DHX57 PE=1 SV=2	5	0	10.143	1.2448e+06	9249000
sp|Q6P1N0|C2D1A_HUMAN	sp|Q6P1N0|C2D1A_HUMAN	>sp|Q6P1N0|C2D1A_HUMAN Coiled-coil and C2 domain-containing protein 1A OS=Homo sapiens OX=9606 GN=CC2D1A PE=1 SV=1	5	0	20.195	2.6319e+07	26952000
sp|Q6UWP7|LCLT1_HUMAN	sp|Q6UWP7|LCLT1_HUMAN	>sp|Q6UWP7|LCLT1_HUMAN Lysocardiolipin acyltransferase 1 OS=Homo sapiens OX=9606 GN=LCLAT1 PE=1 SV=1	5	0	13.304	4.2554e+07	50876000
sp|Q6YN16|HSDL2_HUMAN	sp|Q6YN16|HSDL2_HUMAN	>sp|Q6YN16|HSDL2_HUMAN Hydroxysteroid dehydrogenase-like protein 2 OS=Homo sapiens OX=9606 GN=HSDL2 PE=1 SV=1	5	0	22.633	2.69249e+07	26655000
sp|Q71RC2|LARP4_HUMAN	sp|Q71RC2|LARP4_HUMAN	>sp|Q71RC2|LARP4_HUMAN La-related protein 4 OS=Homo sapiens OX=9606 GN=LARP4 PE=1 SV=3	5	0	40.687	2.58795e+07	25426000
sp|Q7KZI7|MARK2_HUMAN	sp|Q7KZI7|MARK2_HUMAN	>sp|Q7KZI7|MARK2_HUMAN Serine/threonine-protein kinase MARK2 OS=Homo sapiens OX=9606 GN=MARK2 PE=1 SV=2	5	0	41.581	3.28729e+07	26532000
sp|Q7KZN9|COX15_HUMAN	sp|Q7KZN9|COX15_HUMAN	>sp|Q7KZN9|COX15_HUMAN Cytochrome c oxidase assembly protein COX15 homolog OS=Homo sapiens OX=9606 GN=COX15 PE=1 SV=1	5	0	25.123	2.55122e+07	28590000
sp|Q86U42|PABP2_HUMAN	sp|Q86U42|PABP2_HUMAN	>sp|Q86U42|PABP2_HUMAN Polyadenylate-binding protein 2 OS=Homo sapiens OX=9606 GN=PABPN1 PE=1 SV=3	5	0	43.082	2.401e+06	7147600
sp|Q86UK7|ZN598_HUMAN	sp|Q86UK7|ZN598_HUMAN	>sp|Q86UK7|ZN598_HUMAN E3 ubiquitin-protein ligase ZNF598 OS=Homo sapiens OX=9606 GN=ZNF598 PE=1 SV=1	5	0	15.877	5.27837e+06	4208200
sp|Q8N122|RPTOR_HUMAN	sp|Q8N122|RPTOR_HUMAN	>sp|Q8N122|RPTOR_HUMAN Regulatory-associated protein of mTOR OS=Homo sapiens OX=9606 GN=RPTOR PE=1 SV=1	5	0	16.403	1.46399e+07	14713000
sp|Q8NC51|PAIRB_HUMAN	sp|Q8NC51|PAIRB_HUMAN	>sp|Q8NC51|PAIRB_HUMAN Plasminogen activator inhibitor 1 RNA-binding protein OS=Homo sapiens OX=9606 GN=SERBP1 PE=1 SV=2	5	0	18.071	1.72541e+07	19657000
sp|Q8TCT9|HM13_HUMAN	sp|Q8TCT9|HM13_HUMAN	>sp|Q8TCT9|HM13_HUMAN Minor histocompatibility antigen H13 OS=Homo sapiens OX=9606 GN=HM13 PE=1 SV=1	5	0	206.06	1.27659e+08	127310000
sp|Q8TER5|ARH40_HUMAN	sp|Q8TER5|ARH40_HUMAN	>sp|Q8TER5|ARH40_HUMAN Rho guanine nucleotide exchange factor 40 OS=Homo sapiens OX=9606 GN=ARHGEF40 PE=1 SV=3	5	0	10.042	5.70195e+06	4549400
sp|Q8WWY3|PRP31_HUMAN	sp|Q8WWY3|PRP31_HUMAN	>sp|Q8WWY3|PRP31_HUMAN U4/U6 small nuclear ribonucleoprotein Prp31 OS=Homo sapiens OX=9606 GN=PRPF31 PE=1 SV=2	5	0	16.265	1.0068e+07	14217000
sp|Q8WXF1|PSPC1_HUMAN	sp|Q8WXF1|PSPC1_HUMAN	>sp|Q8WXF1|PSPC1_HUMAN Paraspeckle component 1 OS=Homo sapiens OX=9606 GN=PSPC1 PE=1 SV=1	5	0	44.695	7.99485e+07	82691000
sp|Q8WZ42|TITIN_HUMAN	sp|Q8WZ42|TITIN_HUMAN	>sp|Q8WZ42|TITIN_HUMAN Titin OS=Homo sapiens OX=9606 GN=TTN PE=1 SV=4	5	0	8.1396	3.17678e+07	2303000
sp|Q92643|GPI8_HUMAN	sp|Q92643|GPI8_HUMAN	>sp|Q92643|GPI8_HUMAN GPI-anchor transamidase OS=Homo sapiens OX=9606 GN=PIGK PE=1 SV=2	5	0	35.793	3.58303e+07	23869000
sp|Q92804|RBP56_HUMAN	sp|Q92804|RBP56_HUMAN	>sp|Q92804|RBP56_HUMAN TATA-binding protein-associated factor 2N OS=Homo sapiens OX=9606 GN=TAF15 PE=1 SV=1	5	0	133.93	6.86068e+07	52918000
sp|Q96DB5|RMD1_HUMAN	sp|Q96DB5|RMD1_HUMAN	>sp|Q96DB5|RMD1_HUMAN Regulator of microtubule dynamics protein 1 OS=Homo sapiens OX=9606 GN=RMDN1 PE=1 SV=1	5	0	14.221	3.73049e+07	40322000
sp|Q96GK7|FAH2A_HUMAN	sp|Q96GK7|FAH2A_HUMAN	>sp|Q96GK7|FAH2A_HUMAN Fumarylacetoacetate hydrolase domain-containing protein 2A OS=Homo sapiens OX=9606 GN=FAHD2A PE=1 SV=1	5	0	30.779	3.5805e+07	46155000
sp|Q96HY6|DDRGK_HUMAN	sp|Q96HY6|DDRGK_HUMAN	>sp|Q96HY6|DDRGK_HUMAN DDRGK domain-containing protein 1 OS=Homo sapiens OX=9606 GN=DDRGK1 PE=1 SV=2	5	0	71.192	4.05916e+06	18990000
sp|Q96JB5|CK5P3_HUMAN	sp|Q96JB5|CK5P3_HUMAN	>sp|Q96JB5|CK5P3_HUMAN CDK5 regulatory subunit-associated protein 3 OS=Homo sapiens OX=9606 GN=CDK5RAP3 PE=1 SV=2	5	0	23.921	4.72856e+07	34987000
sp|Q96KN1|LRAT2_HUMAN	sp|Q96KN1|LRAT2_HUMAN	>sp|Q96KN1|LRAT2_HUMAN Protein LRATD2 OS=Homo sapiens OX=9606 GN=LRATD2 PE=1 SV=1	5	0	41.387	3.33928e+07	39233000
sp|Q96L92|SNX27_HUMAN	sp|Q96L92|SNX27_HUMAN	>sp|Q96L92|SNX27_HUMAN Sorting nexin-27 OS=Homo sapiens OX=9606 GN=SNX27 PE=1 SV=2	5	0	17.246	3.92535e+07	35051000
sp|Q96P47|AGAP3_HUMAN	sp|Q96P47|AGAP3_HUMAN	>sp|Q96P47|AGAP3_HUMAN Arf-GAP with GTPase, ANK repeat and PH domain-containing protein 3 OS=Homo sapiens OX=9606 GN=AGAP3 PE=1 SV=2	5	0	25.821	5.45269e+06	10267000
sp|Q96S52|PIGS_HUMAN	sp|Q96S52|PIGS_HUMAN	>sp|Q96S52|PIGS_HUMAN GPI transamidase component PIG-S OS=Homo sapiens OX=9606 GN=PIGS PE=1 SV=3	5	0	59.979	4.7048e+07	51227000
sp|Q96SU4|OSBL9_HUMAN	sp|Q96SU4|OSBL9_HUMAN	>sp|Q96SU4|OSBL9_HUMAN Oxysterol-binding protein-related protein 9 OS=Homo sapiens OX=9606 GN=OSBPL9 PE=1 SV=2	5	0	28.702	2.19696e+08	111310000
sp|Q99497|PARK7_HUMAN	sp|Q99497|PARK7_HUMAN	>sp|Q99497|PARK7_HUMAN Protein/nucleic acid deglycase DJ-1 OS=Homo sapiens OX=9606 GN=PARK7 PE=1 SV=2	5	0	53.845	4.44889e+07	45634000
sp|Q99720|SGMR1_HUMAN	sp|Q99720|SGMR1_HUMAN	>sp|Q99720|SGMR1_HUMAN Sigma non-opioid intracellular receptor 1 OS=Homo sapiens OX=9606 GN=SIGMAR1 PE=1 SV=1	5	0	57.327	1.10257e+08	78641000
sp|Q99729|ROAA_HUMAN	sp|Q99729|ROAA_HUMAN	>sp|Q99729|ROAA_HUMAN Heterogeneous nuclear ribonucleoprotein A/B OS=Homo sapiens OX=9606 GN=HNRNPAB PE=1 SV=2	5	0	33.571	4.54919e+07	36729000
sp|Q99747|SNAG_HUMAN	sp|Q99747|SNAG_HUMAN	>sp|Q99747|SNAG_HUMAN Gamma-soluble NSF attachment protein OS=Homo sapiens OX=9606 GN=NAPG PE=1 SV=1	5	0	25.842	1.39181e+07	20168000
sp|Q9BQ67|GRWD1_HUMAN	sp|Q9BQ67|GRWD1_HUMAN	>sp|Q9BQ67|GRWD1_HUMAN Glutamate-rich WD repeat-containing protein 1 OS=Homo sapiens OX=9606 GN=GRWD1 PE=1 SV=1	5	0	42.733	2.88471e+07	22463000
sp|Q9BQ69|MACD1_HUMAN	sp|Q9BQ69|MACD1_HUMAN	>sp|Q9BQ69|MACD1_HUMAN ADP-ribose glycohydrolase MACROD1 OS=Homo sapiens OX=9606 GN=MACROD1 PE=1 SV=2	5	0	49.037	9.55604e+07	105400000
sp|Q9BQA1|MEP50_HUMAN	sp|Q9BQA1|MEP50_HUMAN	>sp|Q9BQA1|MEP50_HUMAN Methylosome protein 50 OS=Homo sapiens OX=9606 GN=WDR77 PE=1 SV=1	5	0	18.583	7.58711e+07	85024000
sp|Q9BRX2|PELO_HUMAN	sp|Q9BRX2|PELO_HUMAN	>sp|Q9BRX2|PELO_HUMAN Protein pelota homolog OS=Homo sapiens OX=9606 GN=PELO PE=1 SV=2	5	0	35.021	2.59081e+07	10265000
sp|Q9BSD7|NTPCR_HUMAN	sp|Q9BSD7|NTPCR_HUMAN	>sp|Q9BSD7|NTPCR_HUMAN Cancer-related nucleoside-triphosphatase OS=Homo sapiens OX=9606 GN=NTPCR PE=1 SV=1	5	0	40.365	2.65726e+07	33537000
sp|Q9BU23|LMF2_HUMAN	sp|Q9BU23|LMF2_HUMAN	>sp|Q9BU23|LMF2_HUMAN Lipase maturation factor 2 OS=Homo sapiens OX=9606 GN=LMF2 PE=1 SV=2	5	0	37.944	2.12351e+07	24801000
sp|Q9BYJ9|YTHD1_HUMAN	sp|Q9BYJ9|YTHD1_HUMAN	>sp|Q9BYJ9|YTHD1_HUMAN YTH domain-containing family protein 1 OS=Homo sapiens OX=9606 GN=YTHDF1 PE=1 SV=1	5	0	5.8898	1.37964e+07	13244000
sp|Q9C0C9|UBE2O_HUMAN	sp|Q9C0C9|UBE2O_HUMAN	>sp|Q9C0C9|UBE2O_HUMAN (E3-independent) E2 ubiquitin-conjugating enzyme OS=Homo sapiens OX=9606 GN=UBE2O PE=1 SV=3	5	0	14.752	2.02115e+07	28714000
sp|Q9GZT3|SLIRP_HUMAN	sp|Q9GZT3|SLIRP_HUMAN	>sp|Q9GZT3|SLIRP_HUMAN SRA stem-loop-interacting RNA-binding protein, mitochondrial OS=Homo sapiens OX=9606 GN=SLIRP PE=1 SV=1	5	0	50.828	1.13058e+08	106560000
sp|Q9GZZ1|NAA50_HUMAN	sp|Q9GZZ1|NAA50_HUMAN	>sp|Q9GZZ1|NAA50_HUMAN N-alpha-acetyltransferase 50 OS=Homo sapiens OX=9606 GN=NAA50 PE=1 SV=1	5	0	20.656	8.28324e+07	79030000
sp|Q9H089|LSG1_HUMAN	sp|Q9H089|LSG1_HUMAN	>sp|Q9H089|LSG1_HUMAN Large subunit GTPase 1 homolog OS=Homo sapiens OX=9606 GN=LSG1 PE=1 SV=2	5	0	45.679	1.46009e+07	11469000
sp|Q9H0U3|MAGT1_HUMAN	sp|Q9H0U3|MAGT1_HUMAN	>sp|Q9H0U3|MAGT1_HUMAN Magnesium transporter protein 1 OS=Homo sapiens OX=9606 GN=MAGT1 PE=1 SV=1	5	0	22.403	4.13892e+07	41423000
sp|Q9H2U1|DHX36_HUMAN	sp|Q9H2U1|DHX36_HUMAN	>sp|Q9H2U1|DHX36_HUMAN ATP-dependent DNA/RNA helicase DHX36 OS=Homo sapiens OX=9606 GN=DHX36 PE=1 SV=2	5	0	17.331	1.55798e+07	3113800
sp|Q9H788|SH24A_HUMAN	sp|Q9H788|SH24A_HUMAN	>sp|Q9H788|SH24A_HUMAN SH2 domain-containing protein 4A OS=Homo sapiens OX=9606 GN=SH2D4A PE=1 SV=1	5	0	25.538	3.04044e+07	33540000
sp|Q9H993|ARMT1_HUMAN	sp|Q9H993|ARMT1_HUMAN	>sp|Q9H993|ARMT1_HUMAN Damage-control phosphatase ARMT1 OS=Homo sapiens OX=9606 GN=ARMT1 PE=1 SV=1	5	0	122.5	1.73356e+07	43595000
sp|Q9HA77|SYCM_HUMAN	sp|Q9HA77|SYCM_HUMAN	>sp|Q9HA77|SYCM_HUMAN Probable cysteine--tRNA ligase, mitochondrial OS=Homo sapiens OX=9606 GN=CARS2 PE=1 SV=1	5	0	18.816	3.48112e+07	48223000
sp|Q9HB71|CYBP_HUMAN	sp|Q9HB71|CYBP_HUMAN	>sp|Q9HB71|CYBP_HUMAN Calcyclin-binding protein OS=Homo sapiens OX=9606 GN=CACYBP PE=1 SV=2	5	0	12.024	1.67285e+07	9067300
sp|Q9HC35|EMAL4_HUMAN	sp|Q9HC35|EMAL4_HUMAN	>sp|Q9HC35|EMAL4_HUMAN Echinoderm microtubule-associated protein-like 4 OS=Homo sapiens OX=9606 GN=EML4 PE=1 SV=3	5	0	15.524	6.52248e+07	35448000
sp|Q9NNW5|WDR6_HUMAN	sp|Q9NNW5|WDR6_HUMAN	>sp|Q9NNW5|WDR6_HUMAN WD repeat-containing protein 6 OS=Homo sapiens OX=9606 GN=WDR6 PE=1 SV=1	5	0	11.129	1.29483e+07	12480000
sp|Q9NQ29|LUC7L_HUMAN	sp|Q9NQ29|LUC7L_HUMAN	>sp|Q9NQ29|LUC7L_HUMAN Putative RNA-binding protein Luc7-like 1 OS=Homo sapiens OX=9606 GN=LUC7L PE=1 SV=1	5	0	24.846	0	3777300
sp|Q9NQZ2|SAS10_HUMAN	sp|Q9NQZ2|SAS10_HUMAN	>sp|Q9NQZ2|SAS10_HUMAN Something about silencing protein 10 OS=Homo sapiens OX=9606 GN=UTP3 PE=1 SV=1	5	0	76.63	5.64744e+06	2948500
sp|Q9NR46|SHLB2_HUMAN	sp|Q9NR46|SHLB2_HUMAN	>sp|Q9NR46|SHLB2_HUMAN Endophilin-B2 OS=Homo sapiens OX=9606 GN=SH3GLB2 PE=1 SV=1	5	0	38.6	4.86466e+06	22580000
sp|Q9NTX5|ECHD1_HUMAN	sp|Q9NTX5|ECHD1_HUMAN	>sp|Q9NTX5|ECHD1_HUMAN Ethylmalonyl-CoA decarboxylase OS=Homo sapiens OX=9606 GN=ECHDC1 PE=1 SV=2	5	0	67.389	2.68813e+07	17320000
sp|Q9NUQ2|PLCE_HUMAN	sp|Q9NUQ2|PLCE_HUMAN	>sp|Q9NUQ2|PLCE_HUMAN 1-acyl-sn-glycerol-3-phosphate acyltransferase epsilon OS=Homo sapiens OX=9606 GN=AGPAT5 PE=1 SV=3	5	0	28.458	3.70192e+07	24365000
sp|Q9NVA2|SEP11_HUMAN;sp|Q14141|SEPT6_HUMAN	sp|Q9NVA2|SEP11_HUMAN	>sp|Q9NVA2|SEP11_HUMAN Septin-11 OS=Homo sapiens OX=9606 GN=SEPTIN11 PE=1 SV=3	5	0	21.893	6.17166e+06	6064600
sp|Q9NXG2|THUM1_HUMAN	sp|Q9NXG2|THUM1_HUMAN	>sp|Q9NXG2|THUM1_HUMAN THUMP domain-containing protein 1 OS=Homo sapiens OX=9606 GN=THUMPD1 PE=1 SV=2	5	0	38.871	1.93255e+07	29811000
sp|Q9NY33|DPP3_HUMAN	sp|Q9NY33|DPP3_HUMAN	>sp|Q9NY33|DPP3_HUMAN Dipeptidyl peptidase 3 OS=Homo sapiens OX=9606 GN=DPP3 PE=1 SV=2	5	0	38.583	2.65979e+07	22670000
sp|Q9NYF8|BCLF1_HUMAN	sp|Q9NYF8|BCLF1_HUMAN	>sp|Q9NYF8|BCLF1_HUMAN Bcl-2-associated transcription factor 1 OS=Homo sapiens OX=9606 GN=BCLAF1 PE=1 SV=2	5	0	14.282	8.34544e+06	14163000
sp|Q9P2K8|E2AK4_HUMAN	sp|Q9P2K8|E2AK4_HUMAN	>sp|Q9P2K8|E2AK4_HUMAN eIF-2-alpha kinase GCN2 OS=Homo sapiens OX=9606 GN=EIF2AK4 PE=1 SV=3	5	0	16.212	3.44302e+07	21883000
sp|Q9UBM7|DHCR7_HUMAN	sp|Q9UBM7|DHCR7_HUMAN	>sp|Q9UBM7|DHCR7_HUMAN 7-dehydrocholesterol reductase OS=Homo sapiens OX=9606 GN=DHCR7 PE=1 SV=1	5	0	21.727	1.39571e+08	47022000
sp|Q9UBU9|NXF1_HUMAN	sp|Q9UBU9|NXF1_HUMAN	>sp|Q9UBU9|NXF1_HUMAN Nuclear RNA export factor 1 OS=Homo sapiens OX=9606 GN=NXF1 PE=1 SV=1	5	0	13.919	1.26603e+08	73576000
sp|Q9UBV2|SE1L1_HUMAN	sp|Q9UBV2|SE1L1_HUMAN	>sp|Q9UBV2|SE1L1_HUMAN Protein sel-1 homolog 1 OS=Homo sapiens OX=9606 GN=SEL1L PE=1 SV=3	5	0	41.549	4.97345e+06	17445000
sp|Q9UG63|ABCF2_HUMAN	sp|Q9UG63|ABCF2_HUMAN	>sp|Q9UG63|ABCF2_HUMAN ATP-binding cassette sub-family F member 2 OS=Homo sapiens OX=9606 GN=ABCF2 PE=1 SV=2	5	0	12.934	2.7602e+07	46751000
sp|Q9UGP4|LIMD1_HUMAN	sp|Q9UGP4|LIMD1_HUMAN	>sp|Q9UGP4|LIMD1_HUMAN LIM domain-containing protein 1 OS=Homo sapiens OX=9606 GN=LIMD1 PE=1 SV=1	5	0	50.788	3.48307e+07	42899000
sp|Q9UI10|EI2BD_HUMAN	sp|Q9UI10|EI2BD_HUMAN	>sp|Q9UI10|EI2BD_HUMAN Translation initiation factor eIF-2B subunit delta OS=Homo sapiens OX=9606 GN=EIF2B4 PE=1 SV=2	5	0	29.856	2.53963e+07	28561000
sp|Q9UKG1|DP13A_HUMAN	sp|Q9UKG1|DP13A_HUMAN	>sp|Q9UKG1|DP13A_HUMAN DCC-interacting protein 13-alpha OS=Homo sapiens OX=9606 GN=APPL1 PE=1 SV=1	5	0	46.508	1.39651e+07	5857800
sp|Q9UL42|PNMA2_HUMAN	sp|Q9UL42|PNMA2_HUMAN	>sp|Q9UL42|PNMA2_HUMAN Paraneoplastic antigen Ma2 OS=Homo sapiens OX=9606 GN=PNMA2 PE=1 SV=2	5	0	101.92	3.65303e+07	23395000
sp|Q9UNS2|CSN3_HUMAN	sp|Q9UNS2|CSN3_HUMAN	>sp|Q9UNS2|CSN3_HUMAN COP9 signalosome complex subunit 3 OS=Homo sapiens OX=9606 GN=COPS3 PE=1 SV=3	5	0	23.327	2.94037e+07	19458000
sp|Q9Y315|DEOC_HUMAN	sp|Q9Y315|DEOC_HUMAN	>sp|Q9Y315|DEOC_HUMAN Deoxyribose-phosphate aldolase OS=Homo sapiens OX=9606 GN=DERA PE=1 SV=2	5	0	17.497	3.4615e+07	66515000
sp|Q9Y3D9|RT23_HUMAN	sp|Q9Y3D9|RT23_HUMAN	>sp|Q9Y3D9|RT23_HUMAN 28S ribosomal protein S23, mitochondrial OS=Homo sapiens OX=9606 GN=MRPS23 PE=1 SV=2	5	0	20.706	3.5774e+07	29324000
sp|Q9Y3U8|RL36_HUMAN	sp|Q9Y3U8|RL36_HUMAN	>sp|Q9Y3U8|RL36_HUMAN 60S ribosomal protein L36 OS=Homo sapiens OX=9606 GN=RPL36 PE=1 SV=3	5	0	33.802	4.63744e+08	231650000
sp|Q9Y4K4|M4K5_HUMAN	sp|Q9Y4K4|M4K5_HUMAN	>sp|Q9Y4K4|M4K5_HUMAN Mitogen-activated protein kinase kinase kinase kinase 5 OS=Homo sapiens OX=9606 GN=MAP4K5 PE=1 SV=2	5	0	12.555	4.23624e+06	15155000
sp|Q9Y512|SAM50_HUMAN	sp|Q9Y512|SAM50_HUMAN	>sp|Q9Y512|SAM50_HUMAN Sorting and assembly machinery component 50 homolog OS=Homo sapiens OX=9606 GN=SAMM50 PE=1 SV=3	5	0	16.884	3.1676e+07	29343000
sp|Q9Y606|TRUA_HUMAN	sp|Q9Y606|TRUA_HUMAN	>sp|Q9Y606|TRUA_HUMAN tRNA pseudouridine synthase A OS=Homo sapiens OX=9606 GN=PUS1 PE=1 SV=3	5	0	12.454	3.20363e+07	19395000
sp|A6NJ78|MET15_HUMAN	sp|A6NJ78|MET15_HUMAN	>sp|A6NJ78|MET15_HUMAN Probable methyltransferase-like protein 15 OS=Homo sapiens OX=9606 GN=METTL15 PE=1 SV=1	4	0	15.784	8.75111e+06	10953000
sp|O00161|SNP23_HUMAN	sp|O00161|SNP23_HUMAN	>sp|O00161|SNP23_HUMAN Synaptosomal-associated protein 23 OS=Homo sapiens OX=9606 GN=SNAP23 PE=1 SV=1	4	0	49.334	2.50497e+07	7840300
sp|O00411|RPOM_HUMAN	sp|O00411|RPOM_HUMAN	>sp|O00411|RPOM_HUMAN DNA-directed RNA polymerase, mitochondrial OS=Homo sapiens OX=9606 GN=POLRMT PE=1 SV=2	4	0	33.009	6.4099e+06	6912100
sp|O00425|IF2B3_HUMAN	sp|O00425|IF2B3_HUMAN	>sp|O00425|IF2B3_HUMAN Insulin-like growth factor 2 mRNA-binding protein 3 OS=Homo sapiens OX=9606 GN=IGF2BP3 PE=1 SV=2	4	0	14.413	1.08178e+07	23070000
sp|O00442|RTCA_HUMAN	sp|O00442|RTCA_HUMAN	>sp|O00442|RTCA_HUMAN RNA 3-terminal phosphate cyclase OS=Homo sapiens OX=9606 GN=RTCA PE=1 SV=1	4	0	9.867	2.59162e+06	17161000
sp|O00469|PLOD2_HUMAN	sp|O00469|PLOD2_HUMAN	>sp|O00469|PLOD2_HUMAN Procollagen-lysine,2-oxoglutarate 5-dioxygenase 2 OS=Homo sapiens OX=9606 GN=PLOD2 PE=1 SV=2	4	0	18.845	9.5091e+06	14503000
sp|O14773|TPP1_HUMAN	sp|O14773|TPP1_HUMAN	>sp|O14773|TPP1_HUMAN Tripeptidyl-peptidase 1 OS=Homo sapiens OX=9606 GN=TPP1 PE=1 SV=2	4	0	29.677	4.6667e+06	39943000
sp|O14828|SCAM3_HUMAN	sp|O14828|SCAM3_HUMAN	>sp|O14828|SCAM3_HUMAN Secretory carrier-associated membrane protein 3 OS=Homo sapiens OX=9606 GN=SCAMP3 PE=1 SV=3	4	0	83.068	3.74805e+07	51221000
sp|O14929|HAT1_HUMAN	sp|O14929|HAT1_HUMAN	>sp|O14929|HAT1_HUMAN Histone acetyltransferase type B catalytic subunit OS=Homo sapiens OX=9606 GN=HAT1 PE=1 SV=1	4	0	59.503	3.98664e+07	24531000
sp|O15091|MRPP3_HUMAN	sp|O15091|MRPP3_HUMAN	>sp|O15091|MRPP3_HUMAN Mitochondrial ribonuclease P catalytic subunit OS=Homo sapiens OX=9606 GN=PRORP PE=1 SV=2	4	0	15.955	1.43312e+07	13713000
sp|O15145|ARPC3_HUMAN	sp|O15145|ARPC3_HUMAN	>sp|O15145|ARPC3_HUMAN Actin-related protein 2/3 complex subunit 3 OS=Homo sapiens OX=9606 GN=ARPC3 PE=1 SV=3	4	0	45.638	1.4244e+08	168580000
sp|O15269|SPTC1_HUMAN	sp|O15269|SPTC1_HUMAN	>sp|O15269|SPTC1_HUMAN Serine palmitoyltransferase 1 OS=Homo sapiens OX=9606 GN=SPTLC1 PE=1 SV=1	4	0	10.637	1.80563e+07	9609100
sp|O15294|OGT1_HUMAN	sp|O15294|OGT1_HUMAN	>sp|O15294|OGT1_HUMAN UDP-N-acetylglucosamine--peptide N-acetylglucosaminyltransferase 110 kDa subunit OS=Homo sapiens OX=9606 GN=OGT PE=1 SV=3	4	0	13.935	1.25891e+07	7554900
sp|O15397|IPO8_HUMAN	sp|O15397|IPO8_HUMAN	>sp|O15397|IPO8_HUMAN Importin-8 OS=Homo sapiens OX=9606 GN=IPO8 PE=1 SV=2	4	0	10.067	3.85925e+06	14826000
sp|O43172|PRP4_HUMAN	sp|O43172|PRP4_HUMAN	>sp|O43172|PRP4_HUMAN U4/U6 small nuclear ribonucleoprotein Prp4 OS=Homo sapiens OX=9606 GN=PRPF4 PE=1 SV=2	4	0	14.158	1.67228e+07	23978000
sp|O43670|ZN207_HUMAN	sp|O43670|ZN207_HUMAN	>sp|O43670|ZN207_HUMAN BUB3-interacting and GLEBS motif-containing protein ZNF207 OS=Homo sapiens OX=9606 GN=ZNF207 PE=1 SV=1	4	0	32.324	1.11976e+07	22448000
sp|O43809|CPSF5_HUMAN	sp|O43809|CPSF5_HUMAN	>sp|O43809|CPSF5_HUMAN Cleavage and polyadenylation specificity factor subunit 5 OS=Homo sapiens OX=9606 GN=NUDT21 PE=1 SV=1	4	0	10.469	8.03387e+06	34317000
sp|O60493|SNX3_HUMAN	sp|O60493|SNX3_HUMAN	>sp|O60493|SNX3_HUMAN Sorting nexin-3 OS=Homo sapiens OX=9606 GN=SNX3 PE=1 SV=3	4	0	11.674	1.27532e+07	34826000
sp|O60762|DPM1_HUMAN	sp|O60762|DPM1_HUMAN	>sp|O60762|DPM1_HUMAN Dolichol-phosphate mannosyltransferase subunit 1 OS=Homo sapiens OX=9606 GN=DPM1 PE=1 SV=1	4	0	46.158	3.54619e+07	37698000
sp|O60826|CCD22_HUMAN	sp|O60826|CCD22_HUMAN	>sp|O60826|CCD22_HUMAN Coiled-coil domain-containing protein 22 OS=Homo sapiens OX=9606 GN=CCDC22 PE=1 SV=1	4	0	12.093	5.07525e+06	26324000
sp|O75306|NDUS2_HUMAN	sp|O75306|NDUS2_HUMAN	>sp|O75306|NDUS2_HUMAN NADH dehydrogenase [ubiquinone] iron-sulfur protein 2, mitochondrial OS=Homo sapiens OX=9606 GN=NDUFS2 PE=1 SV=2	4	0	12.58	2.24516e+07	22514000
sp|O75431|MTX2_HUMAN	sp|O75431|MTX2_HUMAN	>sp|O75431|MTX2_HUMAN Metaxin-2 OS=Homo sapiens OX=9606 GN=MTX2 PE=1 SV=1	4	0	18.264	2.54652e+07	14917000
sp|O75828|CBR3_HUMAN	sp|O75828|CBR3_HUMAN	>sp|O75828|CBR3_HUMAN Carbonyl reductase [NADPH] 3 OS=Homo sapiens OX=9606 GN=CBR3 PE=1 SV=3	4	0.00039017	5.8679	0	7968500
sp|O75832|PSD10_HUMAN	sp|O75832|PSD10_HUMAN	>sp|O75832|PSD10_HUMAN 26S proteasome non-ATPase regulatory subunit 10 OS=Homo sapiens OX=9606 GN=PSMD10 PE=1 SV=1	4	0	26.933	2.79853e+07	4923200
sp|O94760|DDAH1_HUMAN;sp|O95865|DDAH2_HUMAN	sp|O94760|DDAH1_HUMAN	>sp|O94760|DDAH1_HUMAN N(G),N(G)-dimethylarginine dimethylaminohydrolase 1 OS=Homo sapiens OX=9606 GN=DDAH1 PE=1 SV=3	4	0	12.689	1.86427e+07	4039400
sp|O94763|RMP_HUMAN	sp|O94763|RMP_HUMAN	>sp|O94763|RMP_HUMAN Unconventional prefoldin RPB5 interactor 1 OS=Homo sapiens OX=9606 GN=URI1 PE=1 SV=3	4	0	10.436	638236	6954700
sp|O94804|STK10_HUMAN	sp|O94804|STK10_HUMAN	>sp|O94804|STK10_HUMAN Serine/threonine-protein kinase 10 OS=Homo sapiens OX=9606 GN=STK10 PE=1 SV=1	4	0	9.8385	5.38556e+06	4463400
sp|O94992|HEXI1_HUMAN	sp|O94992|HEXI1_HUMAN	>sp|O94992|HEXI1_HUMAN Protein HEXIM1 OS=Homo sapiens OX=9606 GN=HEXIM1 PE=1 SV=1	4	0	87.265	0	0
sp|O95072|REC8_HUMAN	sp|O95072|REC8_HUMAN	>sp|O95072|REC8_HUMAN Meiotic recombination protein REC8 homolog OS=Homo sapiens OX=9606 GN=REC8 PE=1 SV=1	4	0	10.199	3.04641e+07	24736000
sp|O95630|STABP_HUMAN	sp|O95630|STABP_HUMAN	>sp|O95630|STABP_HUMAN STAM-binding protein OS=Homo sapiens OX=9606 GN=STAMBP PE=1 SV=1	4	0	8.785	2.79566e+07	20160000
sp|O95674|CDS2_HUMAN	sp|O95674|CDS2_HUMAN	>sp|O95674|CDS2_HUMAN Phosphatidate cytidylyltransferase 2 OS=Homo sapiens OX=9606 GN=CDS2 PE=1 SV=1	4	0	30.91	2.71441e+07	39748000
sp|O96008|TOM40_HUMAN	sp|O96008|TOM40_HUMAN	>sp|O96008|TOM40_HUMAN Mitochondrial import receptor subunit TOM40 homolog OS=Homo sapiens OX=9606 GN=TOMM40 PE=1 SV=1	4	0	12.276	1.00919e+07	5514300
sp|P00390|GSHR_HUMAN	sp|P00390|GSHR_HUMAN	>sp|P00390|GSHR_HUMAN Glutathione reductase, mitochondrial OS=Homo sapiens OX=9606 GN=GSR PE=1 SV=2	4	0	19.034	2.41225e+07	38916000
sp|P05026|AT1B1_HUMAN	sp|P05026|AT1B1_HUMAN	>sp|P05026|AT1B1_HUMAN Sodium/potassium-transporting ATPase subunit beta-1 OS=Homo sapiens OX=9606 GN=ATP1B1 PE=1 SV=1	4	0	26.171	4.78697e+07	46940000
sp|P07858|CATB_HUMAN	sp|P07858|CATB_HUMAN	>sp|P07858|CATB_HUMAN Cathepsin B OS=Homo sapiens OX=9606 GN=CTSB PE=1 SV=3	4	0	10.726	3.84881e+06	11656000
sp|P07954|FUMH_HUMAN	sp|P07954|FUMH_HUMAN	>sp|P07954|FUMH_HUMAN Fumarate hydratase, mitochondrial OS=Homo sapiens OX=9606 GN=FH PE=1 SV=3	4	0	31.636	1.89572e+07	31793000
sp|P16403|H12_HUMAN;sp|P10412|H14_HUMAN;sp|P16402|H13_HUMAN;sp|Q02539|H11_HUMAN;sp|P22492|H1T_HUMAN	sp|P16403|H12_HUMAN;sp|P10412|H14_HUMAN;sp|P16402|H13_HUMAN;sp|Q02539|H11_HUMAN	>sp|P16403|H12_HUMAN Histone H1.2 OS=Homo sapiens OX=9606 GN=HIST1H1C PE=1 SV=2;>sp|P10412|H14_HUMAN Histone H1.4 OS=Homo sapiens OX=9606 GN=HIST1H1E PE=1 SV=2;>sp|P16402|H13_HUMAN Histone H1.3 OS=Homo sapiens OX=9606 GN=HIST1H1D PE=1 SV=2;>sp|Q02539|H11_H	4	0	9.8991	4.03564e+08	230950000
sp|P10620|MGST1_HUMAN	sp|P10620|MGST1_HUMAN	>sp|P10620|MGST1_HUMAN Microsomal glutathione S-transferase 1 OS=Homo sapiens OX=9606 GN=MGST1 PE=1 SV=1	4	0	97.507	2.01277e+08	252980000
sp|P11166|GTR1_HUMAN	sp|P11166|GTR1_HUMAN	>sp|P11166|GTR1_HUMAN Solute carrier family 2, facilitated glucose transporter member 1 OS=Homo sapiens OX=9606 GN=SLC2A1 PE=1 SV=2	4	0	11.205	6.31419e+07	47106000
sp|P13929|ENOB_HUMAN	sp|P13929|ENOB_HUMAN	>sp|P13929|ENOB_HUMAN Beta-enolase OS=Homo sapiens OX=9606 GN=ENO3 PE=1 SV=5	4	0	19.712	0	0
sp|P14314|GLU2B_HUMAN	sp|P14314|GLU2B_HUMAN	>sp|P14314|GLU2B_HUMAN Glucosidase 2 subunit beta OS=Homo sapiens OX=9606 GN=PRKCSH PE=1 SV=2	4	0	30.593	1.67687e+07	25187000
sp|P19022|CADH2_HUMAN;sp|P55283|CADH4_HUMAN	sp|P19022|CADH2_HUMAN	>sp|P19022|CADH2_HUMAN Cadherin-2 OS=Homo sapiens OX=9606 GN=CDH2 PE=1 SV=4	4	0	24.257	1.85773e+07	23249000
sp|P20290|BTF3_HUMAN	sp|P20290|BTF3_HUMAN	>sp|P20290|BTF3_HUMAN Transcription factor BTF3 OS=Homo sapiens OX=9606 GN=BTF3 PE=1 SV=1	4	0	78.052	3.71925e+06	2824600
sp|P20618|PSB1_HUMAN	sp|P20618|PSB1_HUMAN	>sp|P20618|PSB1_HUMAN Proteasome subunit beta type-1 OS=Homo sapiens OX=9606 GN=PSMB1 PE=1 SV=2	4	0	19.145	2.99741e+07	23811000
sp|P20936|RASA1_HUMAN	sp|P20936|RASA1_HUMAN	>sp|P20936|RASA1_HUMAN Ras GTPase-activating protein 1 OS=Homo sapiens OX=9606 GN=RASA1 PE=1 SV=1	4	0	25.89	7.57597e+06	8498600
sp|P22681|CBL_HUMAN	sp|P22681|CBL_HUMAN	>sp|P22681|CBL_HUMAN E3 ubiquitin-protein ligase CBL OS=Homo sapiens OX=9606 GN=CBL PE=1 SV=2	4	0	9.0658	5.64365e+06	7218400
sp|P22830|HEMH_HUMAN	sp|P22830|HEMH_HUMAN	>sp|P22830|HEMH_HUMAN Ferrochelatase, mitochondrial OS=Homo sapiens OX=9606 GN=FECH PE=1 SV=2	4	0	9.6509	2.03148e+07	16187000
sp|P23193|TCEA1_HUMAN	sp|P23193|TCEA1_HUMAN	>sp|P23193|TCEA1_HUMAN Transcription elongation factor A protein 1 OS=Homo sapiens OX=9606 GN=TCEA1 PE=1 SV=2	4	0	9.776	1.82158e+07	18531000
sp|P23743|DGKA_HUMAN	sp|P23743|DGKA_HUMAN	>sp|P23743|DGKA_HUMAN Diacylglycerol kinase alpha OS=Homo sapiens OX=9606 GN=DGKA PE=1 SV=3	4	0	19.175	1.03324e+07	24535000
sp|P24666|PPAC_HUMAN	sp|P24666|PPAC_HUMAN	>sp|P24666|PPAC_HUMAN Low molecular weight phosphotyrosine protein phosphatase OS=Homo sapiens OX=9606 GN=ACP1 PE=1 SV=3	4	0	150.79	1.00977e+08	109860000
sp|P24928|RPB1_HUMAN	sp|P24928|RPB1_HUMAN	>sp|P24928|RPB1_HUMAN DNA-directed RNA polymerase II subunit RPB1 OS=Homo sapiens OX=9606 GN=POLR2A PE=1 SV=2	4	0	8.9367	1.05385e+07	9450700
sp|P25325|THTM_HUMAN	sp|P25325|THTM_HUMAN	>sp|P25325|THTM_HUMAN 3-mercaptopyruvate sulfurtransferase OS=Homo sapiens OX=9606 GN=MPST PE=1 SV=3	4	0	34.92	3.121e+07	28225000
sp|P25787|PSA2_HUMAN	sp|P25787|PSA2_HUMAN	>sp|P25787|PSA2_HUMAN Proteasome subunit alpha type-2 OS=Homo sapiens OX=9606 GN=PSMA2 PE=1 SV=2	4	0	32.693	1.37448e+07	13074000
sp|P25788|PSA3_HUMAN	sp|P25788|PSA3_HUMAN	>sp|P25788|PSA3_HUMAN Proteasome subunit alpha type-3 OS=Homo sapiens OX=9606 GN=PSMA3 PE=1 SV=2	4	0	19.077	5.03772e+07	46487000
sp|P26373|RL13_HUMAN	sp|P26373|RL13_HUMAN	>sp|P26373|RL13_HUMAN 60S ribosomal protein L13 OS=Homo sapiens OX=9606 GN=RPL13 PE=1 SV=4	4	0	73.222	5.43571e+08	420660000
sp|P28482|MK01_HUMAN;sp|P27361|MK03_HUMAN	sp|P28482|MK01_HUMAN;sp|P27361|MK03_HUMAN	>sp|P28482|MK01_HUMAN Mitogen-activated protein kinase 1 OS=Homo sapiens OX=9606 GN=MAPK1 PE=1 SV=3;>sp|P27361|MK03_HUMAN Mitogen-activated protein kinase 3 OS=Homo sapiens OX=9606 GN=MAPK3 PE=1 SV=4	4	0	9.515	6.27862e+06	9003600
sp|P29353|SHC1_HUMAN;sp|P98077|SHC2_HUMAN	sp|P29353|SHC1_HUMAN	>sp|P29353|SHC1_HUMAN SHC-transforming protein 1 OS=Homo sapiens OX=9606 GN=SHC1 PE=1 SV=4	4	0	16.885	1.24904e+07	12563000
sp|P29966|MARCS_HUMAN	sp|P29966|MARCS_HUMAN	>sp|P29966|MARCS_HUMAN Myristoylated alanine-rich C-kinase substrate OS=Homo sapiens OX=9606 GN=MARCKS PE=1 SV=4	4	0	19.596	3.54229e+06	8795900
sp|P30626|SORCN_HUMAN	sp|P30626|SORCN_HUMAN	>sp|P30626|SORCN_HUMAN Sorcin OS=Homo sapiens OX=9606 GN=SRI PE=1 SV=1	4	0	14.404	4.6348e+07	48650000
sp|P31153|METK2_HUMAN	sp|P31153|METK2_HUMAN	>sp|P31153|METK2_HUMAN S-adenosylmethionine synthase isoform type-2 OS=Homo sapiens OX=9606 GN=MAT2A PE=1 SV=1	4	0	15.631	6.647e+07	75074000
sp|P31327|CPSM_HUMAN	sp|P31327|CPSM_HUMAN	>sp|P31327|CPSM_HUMAN Carbamoyl-phosphate synthase [ammonia], mitochondrial OS=Homo sapiens OX=9606 GN=CPS1 PE=1 SV=2	4	0	6.9405	1.16607e+06	911380
sp|P31947|1433S_HUMAN	sp|P31947|1433S_HUMAN	>sp|P31947|1433S_HUMAN 14-3-3 protein sigma OS=Homo sapiens OX=9606 GN=SFN PE=1 SV=1	4	0.00072307	4.4388	1.00893e+08	89332000
sp|P35080|PROF2_HUMAN	sp|P35080|PROF2_HUMAN	>sp|P35080|PROF2_HUMAN Profilin-2 OS=Homo sapiens OX=9606 GN=PFN2 PE=1 SV=3	4	0	41.521	1.10779e+08	107170000
sp|P35251|RFC1_HUMAN	sp|P35251|RFC1_HUMAN	>sp|P35251|RFC1_HUMAN Replication factor C subunit 1 OS=Homo sapiens OX=9606 GN=RFC1 PE=1 SV=4	4	0	12.248	1.19258e+07	9118400
sp|P35268|RL22_HUMAN	sp|P35268|RL22_HUMAN	>sp|P35268|RL22_HUMAN 60S ribosomal protein L22 OS=Homo sapiens OX=9606 GN=RPL22 PE=1 SV=2	4	0	95.087	4.76643e+08	468060000
sp|P35611|ADDA_HUMAN	sp|P35611|ADDA_HUMAN	>sp|P35611|ADDA_HUMAN Alpha-adducin OS=Homo sapiens OX=9606 GN=ADD1 PE=1 SV=2	4	0	15.13	1.12684e+07	21647000
sp|P37108|SRP14_HUMAN	sp|P37108|SRP14_HUMAN	>sp|P37108|SRP14_HUMAN Signal recognition particle 14 kDa protein OS=Homo sapiens OX=9606 GN=SRP14 PE=1 SV=2	4	0	21.797	4.11299e+07	35548000
sp|P40818|UBP8_HUMAN	sp|P40818|UBP8_HUMAN	>sp|P40818|UBP8_HUMAN Ubiquitin carboxyl-terminal hydrolase 8 OS=Homo sapiens OX=9606 GN=USP8 PE=1 SV=1	4	0	10.257	9.56453e+06	11189000
sp|P41214|EIF2D_HUMAN	sp|P41214|EIF2D_HUMAN	>sp|P41214|EIF2D_HUMAN Eukaryotic translation initiation factor 2D OS=Homo sapiens OX=9606 GN=EIF2D PE=1 SV=3	4	0	15.599	1.75066e+07	8138600
sp|P42345|MTOR_HUMAN	sp|P42345|MTOR_HUMAN	>sp|P42345|MTOR_HUMAN Serine/threonine-protein kinase mTOR OS=Homo sapiens OX=9606 GN=MTOR PE=1 SV=1	4	0	10.651	4.24771e+06	5459800
sp|P43487|RANG_HUMAN	sp|P43487|RANG_HUMAN	>sp|P43487|RANG_HUMAN Ran-specific GTPase-activating protein OS=Homo sapiens OX=9606 GN=RANBP1 PE=1 SV=1	4	0	63.153	1.64692e+08	252470000
sp|P46013|KI67_HUMAN	sp|P46013|KI67_HUMAN	>sp|P46013|KI67_HUMAN Proliferation marker protein Ki-67 OS=Homo sapiens OX=9606 GN=MKI67 PE=1 SV=2	4	0	8.6777	6.01387e+06	5811900
sp|P48147|PPCE_HUMAN	sp|P48147|PPCE_HUMAN	>sp|P48147|PPCE_HUMAN Prolyl endopeptidase OS=Homo sapiens OX=9606 GN=PREP PE=1 SV=2	4	0	15.079	1.41809e+07	21758000
sp|P48739|PIPNB_HUMAN	sp|P48739|PIPNB_HUMAN	>sp|P48739|PIPNB_HUMAN Phosphatidylinositol transfer protein beta isoform OS=Homo sapiens OX=9606 GN=PITPNB PE=1 SV=2	4	0	16.441	1.60526e+07	14428000
sp|P49356|FNTB_HUMAN	sp|P49356|FNTB_HUMAN	>sp|P49356|FNTB_HUMAN Protein farnesyltransferase subunit beta OS=Homo sapiens OX=9606 GN=FNTB PE=1 SV=1	4	0	13.739	3.50224e+06	5091800
sp|P49407|ARRB1_HUMAN	sp|P49407|ARRB1_HUMAN	>sp|P49407|ARRB1_HUMAN Beta-arrestin-1 OS=Homo sapiens OX=9606 GN=ARRB1 PE=1 SV=2	4	0	27.059	2.30472e+07	24380000
sp|P49721|PSB2_HUMAN	sp|P49721|PSB2_HUMAN	>sp|P49721|PSB2_HUMAN Proteasome subunit beta type-2 OS=Homo sapiens OX=9606 GN=PSMB2 PE=1 SV=1	4	0	16.907	6.44915e+06	18181000
sp|P49748|ACADV_HUMAN	sp|P49748|ACADV_HUMAN	>sp|P49748|ACADV_HUMAN Very long-chain specific acyl-CoA dehydrogenase, mitochondrial OS=Homo sapiens OX=9606 GN=ACADVL PE=1 SV=1	4	0	11.557	3.3091e+07	36898000
sp|P49773|HINT1_HUMAN	sp|P49773|HINT1_HUMAN	>sp|P49773|HINT1_HUMAN Histidine triad nucleotide-binding protein 1 OS=Homo sapiens OX=9606 GN=HINT1 PE=1 SV=2	4	0	32.66	4.89117e+06	4358600
sp|P50416|CPT1A_HUMAN	sp|P50416|CPT1A_HUMAN	>sp|P50416|CPT1A_HUMAN Carnitine O-palmitoyltransferase 1, liver isoform OS=Homo sapiens OX=9606 GN=CPT1A PE=1 SV=2	4	0	10.411	8.55958e+06	7543200
sp|P51532|SMCA4_HUMAN;sp|P51531|SMCA2_HUMAN	sp|P51532|SMCA4_HUMAN;sp|P51531|SMCA2_HUMAN	>sp|P51532|SMCA4_HUMAN Transcription activator BRG1 OS=Homo sapiens OX=9606 GN=SMARCA4 PE=1 SV=2;>sp|P51531|SMCA2_HUMAN Probable global transcription activator SNF2L2 OS=Homo sapiens OX=9606 GN=SMARCA2 PE=1 SV=2	4	0	9.6572	6.90119e+06	17488000
sp|P51812|KS6A3_HUMAN	sp|P51812|KS6A3_HUMAN	>sp|P51812|KS6A3_HUMAN Ribosomal protein S6 kinase alpha-3 OS=Homo sapiens OX=9606 GN=RPS6KA3 PE=1 SV=1	4	0	7.8946	1.11355e+07	9727900
sp|P52630|STAT2_HUMAN	sp|P52630|STAT2_HUMAN	>sp|P52630|STAT2_HUMAN Signal transducer and activator of transcription 2 OS=Homo sapiens OX=9606 GN=STAT2 PE=1 SV=1	4	0	99.409	2.25813e+06	19395000
sp|P54727|RD23B_HUMAN	sp|P54727|RD23B_HUMAN	>sp|P54727|RD23B_HUMAN UV excision repair protein RAD23 homolog B OS=Homo sapiens OX=9606 GN=RAD23B PE=1 SV=1	4	0	39.034	1.42233e+07	14387000
sp|P56589|PEX3_HUMAN	sp|P56589|PEX3_HUMAN	>sp|P56589|PEX3_HUMAN Peroxisomal biogenesis factor 3 OS=Homo sapiens OX=9606 GN=PEX3 PE=1 SV=1	4	0	11.393	2.02941e+07	17992000
sp|P57721|PCBP3_HUMAN	sp|P57721|PCBP3_HUMAN	>sp|P57721|PCBP3_HUMAN Poly(rC)-binding protein 3 OS=Homo sapiens OX=9606 GN=PCBP3 PE=2 SV=2	4	0.0013918	3.8859	9.48144e+06	0
sp|P60866|RS20_HUMAN	sp|P60866|RS20_HUMAN	>sp|P60866|RS20_HUMAN 40S ribosomal protein S20 OS=Homo sapiens OX=9606 GN=RPS20 PE=1 SV=1	4	0	39.391	2.76089e+08	313060000
sp|P60983|GMFB_HUMAN;sp|O60234|GMFG_HUMAN	sp|P60983|GMFB_HUMAN	>sp|P60983|GMFB_HUMAN Glia maturation factor beta OS=Homo sapiens OX=9606 GN=GMFB PE=1 SV=2	4	0	46.29	6.95627e+07	92662000
sp|P61081|UBC12_HUMAN	sp|P61081|UBC12_HUMAN	>sp|P61081|UBC12_HUMAN NEDD8-conjugating enzyme Ubc12 OS=Homo sapiens OX=9606 GN=UBE2M PE=1 SV=1	4	0	37.706	1.56842e+08	162180000
sp|P61088|UBE2N_HUMAN;sp|Q5JXB2|UE2NL_HUMAN	sp|P61088|UBE2N_HUMAN;sp|Q5JXB2|UE2NL_HUMAN	>sp|P61088|UBE2N_HUMAN Ubiquitin-conjugating enzyme E2 N OS=Homo sapiens OX=9606 GN=UBE2N PE=1 SV=1;>sp|Q5JXB2|UE2NL_HUMAN Putative ubiquitin-conjugating enzyme E2 N-like OS=Homo sapiens OX=9606 GN=UBE2NL PE=1 SV=1	4	0	26.115	2.69834e+07	29682000
sp|P61224|RAP1B_HUMAN;sp|A6NIZ1|RP1BL_HUMAN;sp|P62834|RAP1A_HUMAN	sp|P61224|RAP1B_HUMAN;sp|A6NIZ1|RP1BL_HUMAN;sp|P62834|RAP1A_HUMAN	>sp|P61224|RAP1B_HUMAN Ras-related protein Rap-1b OS=Homo sapiens OX=9606 GN=RAP1B PE=1 SV=1;>sp|A6NIZ1|RP1BL_HUMAN Ras-related protein Rap-1b-like protein OS=Homo sapiens OX=9606 PE=2 SV=1;>sp|P62834|RAP1A_HUMAN Ras-related protein Rap-1A OS=Homo sapiens	4	0	15.756	4.91699e+07	46820000
sp|P61923|COPZ1_HUMAN	sp|P61923|COPZ1_HUMAN	>sp|P61923|COPZ1_HUMAN Coatomer subunit zeta-1 OS=Homo sapiens OX=9606 GN=COPZ1 PE=1 SV=1	4	0	37.192	5.70344e+07	42585000
sp|P62318|SMD3_HUMAN	sp|P62318|SMD3_HUMAN	>sp|P62318|SMD3_HUMAN Small nuclear ribonucleoprotein Sm D3 OS=Homo sapiens OX=9606 GN=SNRPD3 PE=1 SV=1	4	0	18.966	7.89845e+07	88874000
sp|P62330|ARF6_HUMAN	sp|P62330|ARF6_HUMAN	>sp|P62330|ARF6_HUMAN ADP-ribosylation factor 6 OS=Homo sapiens OX=9606 GN=ARF6 PE=1 SV=2	4	0	27.947	8.21427e+07	72549000
sp|P62841|RS15_HUMAN	sp|P62841|RS15_HUMAN	>sp|P62841|RS15_HUMAN 40S ribosomal protein S15 OS=Homo sapiens OX=9606 GN=RPS15 PE=1 SV=2	4	0	73.533	1.91258e+08	140230000
sp|P62851|RS25_HUMAN	sp|P62851|RS25_HUMAN	>sp|P62851|RS25_HUMAN 40S ribosomal protein S25 OS=Homo sapiens OX=9606 GN=RPS25 PE=1 SV=1	4	0	29.317	4.27962e+08	696270000
sp|P63173|RL38_HUMAN	sp|P63173|RL38_HUMAN	>sp|P63173|RL38_HUMAN 60S ribosomal protein L38 OS=Homo sapiens OX=9606 GN=RPL38 PE=1 SV=2	4	0	71.215	6.13471e+08	565050000
sp|P67870|CSK2B_HUMAN	sp|P67870|CSK2B_HUMAN	>sp|P67870|CSK2B_HUMAN Casein kinase II subunit beta OS=Homo sapiens OX=9606 GN=CSNK2B PE=1 SV=1	4	0	10.024	3.37382e+07	28042000
sp|P68036|UB2L3_HUMAN;sp|A0A1B0GUS4|UB2L5_HUMAN	sp|P68036|UB2L3_HUMAN;sp|A0A1B0GUS4|UB2L5_HUMAN	>sp|P68036|UB2L3_HUMAN Ubiquitin-conjugating enzyme E2 L3 OS=Homo sapiens OX=9606 GN=UBE2L3 PE=1 SV=1;>sp|A0A1B0GUS4|UB2L5_HUMAN Ubiquitin-conjugating enzyme E2 L5 OS=Homo sapiens OX=9606 GN=UBE2L5 PE=2 SV=1	4	0	22.283	2.07772e+07	16761000
sp|P78346|RPP30_HUMAN	sp|P78346|RPP30_HUMAN	>sp|P78346|RPP30_HUMAN Ribonuclease P protein subunit p30 OS=Homo sapiens OX=9606 GN=RPP30 PE=1 SV=1	4	0	8.4292	1.47042e+07	33108000
sp|P78362|SRPK2_HUMAN	sp|P78362|SRPK2_HUMAN	>sp|P78362|SRPK2_HUMAN SRSF protein kinase 2 OS=Homo sapiens OX=9606 GN=SRPK2 PE=1 SV=3	4	0	6.6461	1.12769e+07	8562900
sp|P84022|SMAD3_HUMAN;sp|O15198|SMAD9_HUMAN;sp|Q99717|SMAD5_HUMAN;sp|Q15797|SMAD1_HUMAN	sp|P84022|SMAD3_HUMAN;sp|O15198|SMAD9_HUMAN	>sp|P84022|SMAD3_HUMAN Mothers against decapentaplegic homolog 3 OS=Homo sapiens OX=9606 GN=SMAD3 PE=1 SV=1;>sp|O15198|SMAD9_HUMAN Mothers against decapentaplegic homolog 9 OS=Homo sapiens OX=9606 GN=SMAD9 PE=1 SV=1	4	0	9.2393	2.56442e+07	23705000
sp|P98194|AT2C1_HUMAN	sp|P98194|AT2C1_HUMAN	>sp|P98194|AT2C1_HUMAN Calcium-transporting ATPase type 2C member 1 OS=Homo sapiens OX=9606 GN=ATP2C1 PE=1 SV=3	4	0	13.991	1.91155e+07	10827000
sp|P99999|CYC_HUMAN	sp|P99999|CYC_HUMAN	>sp|P99999|CYC_HUMAN Cytochrome c OS=Homo sapiens OX=9606 GN=CYCS PE=1 SV=2	4	0	12.2	2.23724e+07	32838000
sp|Q00266|METK1_HUMAN	sp|Q00266|METK1_HUMAN	>sp|Q00266|METK1_HUMAN S-adenosylmethionine synthase isoform type-1 OS=Homo sapiens OX=9606 GN=MAT1A PE=1 SV=2	4	0	9.482	6.11049e+06	33290000
sp|Q01650|LAT1_HUMAN	sp|Q01650|LAT1_HUMAN	>sp|Q01650|LAT1_HUMAN Large neutral amino acids transporter small subunit 1 OS=Homo sapiens OX=9606 GN=SLC7A5 PE=1 SV=2	4	0	21.433	9.61434e+07	96554000
sp|Q03405|UPAR_HUMAN	sp|Q03405|UPAR_HUMAN	>sp|Q03405|UPAR_HUMAN Urokinase plasminogen activator surface receptor OS=Homo sapiens OX=9606 GN=PLAUR PE=1 SV=1	4	0	12.563	2.39194e+07	32564000
sp|Q06323|PSME1_HUMAN	sp|Q06323|PSME1_HUMAN	>sp|Q06323|PSME1_HUMAN Proteasome activator complex subunit 1 OS=Homo sapiens OX=9606 GN=PSME1 PE=1 SV=1	4	0	12.236	9.78957e+06	7338700
sp|Q09161|NCBP1_HUMAN	sp|Q09161|NCBP1_HUMAN	>sp|Q09161|NCBP1_HUMAN Nuclear cap-binding protein subunit 1 OS=Homo sapiens OX=9606 GN=NCBP1 PE=1 SV=1	4	0	11.869	1.46491e+07	12776000
sp|Q0VDF9|HSP7E_HUMAN	sp|Q0VDF9|HSP7E_HUMAN	>sp|Q0VDF9|HSP7E_HUMAN Heat shock 70 kDa protein 14 OS=Homo sapiens OX=9606 GN=HSPA14 PE=1 SV=1	4	0	11.32	2.08404e+07	17609000
sp|Q12888|TP53B_HUMAN	sp|Q12888|TP53B_HUMAN	>sp|Q12888|TP53B_HUMAN TP53-binding protein 1 OS=Homo sapiens OX=9606 GN=TP53BP1 PE=1 SV=2	4	0	12.504	1.82376e+07	22891000
sp|Q12907|LMAN2_HUMAN	sp|Q12907|LMAN2_HUMAN	>sp|Q12907|LMAN2_HUMAN Vesicular integral-membrane protein VIP36 OS=Homo sapiens OX=9606 GN=LMAN2 PE=1 SV=1	4	0	12.337	3.00051e+06	16530000
sp|Q13043|STK4_HUMAN;sp|Q13188|STK3_HUMAN	sp|Q13043|STK4_HUMAN;sp|Q13188|STK3_HUMAN	>sp|Q13043|STK4_HUMAN Serine/threonine-protein kinase 4 OS=Homo sapiens OX=9606 GN=STK4 PE=1 SV=2;>sp|Q13188|STK3_HUMAN Serine/threonine-protein kinase 3 OS=Homo sapiens OX=9606 GN=STK3 PE=1 SV=2	4	0	10.975	5.14973e+08	333820000
sp|Q13126|MTAP_HUMAN	sp|Q13126|MTAP_HUMAN	>sp|Q13126|MTAP_HUMAN S-methyl-5-thioadenosine phosphorylase OS=Homo sapiens OX=9606 GN=MTAP PE=1 SV=2	4	0	23.412	2.16081e+07	24788000
sp|Q13131|AAPK1_HUMAN;sp|P54646|AAPK2_HUMAN	sp|Q13131|AAPK1_HUMAN	>sp|Q13131|AAPK1_HUMAN 5-AMP-activated protein kinase catalytic subunit alpha-1 OS=Homo sapiens OX=9606 GN=PRKAA1 PE=1 SV=4	4	0	9.0163	1.72243e+07	19508000
sp|Q13185|CBX3_HUMAN;sp|P83916|CBX1_HUMAN	sp|Q13185|CBX3_HUMAN	>sp|Q13185|CBX3_HUMAN Chromobox protein homolog 3 OS=Homo sapiens OX=9606 GN=CBX3 PE=1 SV=4	4	0	28.871	1.9306e+07	26651000
sp|Q13242|SRSF9_HUMAN	sp|Q13242|SRSF9_HUMAN	>sp|Q13242|SRSF9_HUMAN Serine/arginine-rich splicing factor 9 OS=Homo sapiens OX=9606 GN=SRSF9 PE=1 SV=1	4	0	10.037	1.84981e+06	3194700
sp|Q13257|MD2L1_HUMAN	sp|Q13257|MD2L1_HUMAN	>sp|Q13257|MD2L1_HUMAN Mitotic spindle assembly checkpoint protein MAD2A OS=Homo sapiens OX=9606 GN=MAD2L1 PE=1 SV=1	4	0	20.461	2.38253e+07	37410000
sp|Q13404|UB2V1_HUMAN;sp|Q15819|UB2V2_HUMAN	sp|Q13404|UB2V1_HUMAN;sp|Q15819|UB2V2_HUMAN	>sp|Q13404|UB2V1_HUMAN Ubiquitin-conjugating enzyme E2 variant 1 OS=Homo sapiens OX=9606 GN=UBE2V1 PE=1 SV=2;>sp|Q15819|UB2V2_HUMAN Ubiquitin-conjugating enzyme E2 variant 2 OS=Homo sapiens OX=9606 GN=UBE2V2 PE=1 SV=4	4	0	12.623	6.64149e+06	6349500
sp|Q13546|RIPK1_HUMAN	sp|Q13546|RIPK1_HUMAN	>sp|Q13546|RIPK1_HUMAN Receptor-interacting serine/threonine-protein kinase 1 OS=Homo sapiens OX=9606 GN=RIPK1 PE=1 SV=3	4	0	12.77	1.60308e+07	21629000
sp|Q13563|PKD2_HUMAN	sp|Q13563|PKD2_HUMAN	>sp|Q13563|PKD2_HUMAN Polycystin-2 OS=Homo sapiens OX=9606 GN=PKD2 PE=1 SV=3	4	0	10.012	8.42531e+06	10337000
sp|Q13586|STIM1_HUMAN	sp|Q13586|STIM1_HUMAN	>sp|Q13586|STIM1_HUMAN Stromal interaction molecule 1 OS=Homo sapiens OX=9606 GN=STIM1 PE=1 SV=3	4	0	13.753	909413	4222500
sp|Q13595|TRA2A_HUMAN	sp|Q13595|TRA2A_HUMAN	>sp|Q13595|TRA2A_HUMAN Transformer-2 protein homolog alpha OS=Homo sapiens OX=9606 GN=TRA2A PE=1 SV=1	4	0	14.299	2.77959e+07	17127000
sp|Q13724|MOGS_HUMAN	sp|Q13724|MOGS_HUMAN	>sp|Q13724|MOGS_HUMAN Mannosyl-oligosaccharide glucosidase OS=Homo sapiens OX=9606 GN=MOGS PE=1 SV=5	4	0	20.759	7.825e+06	7458400
sp|Q13895|BYST_HUMAN	sp|Q13895|BYST_HUMAN	>sp|Q13895|BYST_HUMAN Bystin OS=Homo sapiens OX=9606 GN=BYSL PE=1 SV=3	4	0	10.721	1.13178e+07	14845000
sp|Q14151|SAFB2_HUMAN	sp|Q14151|SAFB2_HUMAN	>sp|Q14151|SAFB2_HUMAN Scaffold attachment factor B2 OS=Homo sapiens OX=9606 GN=SAFB2 PE=1 SV=1	4	0.0068071	2.9755	0	0
sp|Q14257|RCN2_HUMAN	sp|Q14257|RCN2_HUMAN	>sp|Q14257|RCN2_HUMAN Reticulocalbin-2 OS=Homo sapiens OX=9606 GN=RCN2 PE=1 SV=1	4	0	60.686	4.67324e+07	65144000
sp|Q14694|UBP10_HUMAN	sp|Q14694|UBP10_HUMAN	>sp|Q14694|UBP10_HUMAN Ubiquitin carboxyl-terminal hydrolase 10 OS=Homo sapiens OX=9606 GN=USP10 PE=1 SV=2	4	0	9.8054	3.33469e+07	34242000
sp|Q14738|2A5D_HUMAN;sp|Q13362|2A5G_HUMAN	sp|Q14738|2A5D_HUMAN	>sp|Q14738|2A5D_HUMAN Serine/threonine-protein phosphatase 2A 56 kDa regulatory subunit delta isoform OS=Homo sapiens OX=9606 GN=PPP2R5D PE=1 SV=1	4	0	10.764	3.06799e+06	35103000
sp|Q14914|PTGR1_HUMAN	sp|Q14914|PTGR1_HUMAN	>sp|Q14914|PTGR1_HUMAN Prostaglandin reductase 1 OS=Homo sapiens OX=9606 GN=PTGR1 PE=1 SV=2	4	0	11.217	2.60114e+07	31312000
sp|Q15018|ABRX2_HUMAN	sp|Q15018|ABRX2_HUMAN	>sp|Q15018|ABRX2_HUMAN BRISC complex subunit Abraxas 2 OS=Homo sapiens OX=9606 GN=ABRAXAS2 PE=1 SV=2	4	0	13.6	1.61685e+07	16433000
sp|Q15057|ACAP2_HUMAN	sp|Q15057|ACAP2_HUMAN	>sp|Q15057|ACAP2_HUMAN Arf-GAP with coiled-coil, ANK repeat and PH domain-containing protein 2 OS=Homo sapiens OX=9606 GN=ACAP2 PE=1 SV=3	4	0	18.324	9.09861e+06	14006000
sp|Q15369|ELOC_HUMAN	sp|Q15369|ELOC_HUMAN	>sp|Q15369|ELOC_HUMAN Elongin-C OS=Homo sapiens OX=9606 GN=ELOC PE=1 SV=1	4	0	111.34	9.74252e+07	67888000
sp|Q15370|ELOB_HUMAN	sp|Q15370|ELOB_HUMAN	>sp|Q15370|ELOB_HUMAN Elongin-B OS=Homo sapiens OX=9606 GN=ELOB PE=1 SV=1	4	0	19.537	4.66418e+07	72830000
sp|Q15628|TRADD_HUMAN	sp|Q15628|TRADD_HUMAN	>sp|Q15628|TRADD_HUMAN Tumor necrosis factor receptor type 1-associated DEATH domain protein OS=Homo sapiens OX=9606 GN=TRADD PE=1 SV=2	4	0	30.641	1.76397e+07	22586000
sp|Q15629|TRAM1_HUMAN	sp|Q15629|TRAM1_HUMAN	>sp|Q15629|TRAM1_HUMAN Translocating chain-associated membrane protein 1 OS=Homo sapiens OX=9606 GN=TRAM1 PE=1 SV=3	4	0	24.342	3.47412e+07	43291000
sp|Q15750|TAB1_HUMAN	sp|Q15750|TAB1_HUMAN	>sp|Q15750|TAB1_HUMAN TGF-beta-activated kinase 1 and MAP3K7-binding protein 1 OS=Homo sapiens OX=9606 GN=TAB1 PE=1 SV=1	4	0	28.583	2.22255e+07	14851000
sp|Q16527|CSRP2_HUMAN	sp|Q16527|CSRP2_HUMAN	>sp|Q16527|CSRP2_HUMAN Cysteine and glycine-rich protein 2 OS=Homo sapiens OX=9606 GN=CSRP2 PE=1 SV=3	4	0	10.149	3.96368e+07	26462000
sp|Q16773|KAT1_HUMAN	sp|Q16773|KAT1_HUMAN	>sp|Q16773|KAT1_HUMAN Kynurenine--oxoglutarate transaminase 1 OS=Homo sapiens OX=9606 GN=KYAT1 PE=1 SV=1	4	0	11.851	1.03169e+07	15924000
sp|Q4KMQ1|TPRN_HUMAN	sp|Q4KMQ1|TPRN_HUMAN	>sp|Q4KMQ1|TPRN_HUMAN Taperin OS=Homo sapiens OX=9606 GN=TPRN PE=1 SV=2	4	0	20.97	2.38436e+07	7943300
sp|Q4KMQ2|ANO6_HUMAN	sp|Q4KMQ2|ANO6_HUMAN	>sp|Q4KMQ2|ANO6_HUMAN Anoctamin-6 OS=Homo sapiens OX=9606 GN=ANO6 PE=1 SV=2	4	0	10.236	5.12712e+06	21973000
sp|Q52LJ0|FA98B_HUMAN	sp|Q52LJ0|FA98B_HUMAN	>sp|Q52LJ0|FA98B_HUMAN Protein FAM98B OS=Homo sapiens OX=9606 GN=FAM98B PE=1 SV=2	4	0	87.69	1.30137e+07	112770000
sp|Q53EL6|PDCD4_HUMAN	sp|Q53EL6|PDCD4_HUMAN	>sp|Q53EL6|PDCD4_HUMAN Programmed cell death protein 4 OS=Homo sapiens OX=9606 GN=PDCD4 PE=1 SV=2	4	0	9.0696	1.12497e+07	21585000
sp|Q53H12|AGK_HUMAN	sp|Q53H12|AGK_HUMAN	>sp|Q53H12|AGK_HUMAN Acylglycerol kinase, mitochondrial OS=Homo sapiens OX=9606 GN=AGK PE=1 SV=2	4	0	51.252	2.39515e+07	38921000
sp|Q5TFE4|NT5D1_HUMAN	sp|Q5TFE4|NT5D1_HUMAN	>sp|Q5TFE4|NT5D1_HUMAN 5-nucleotidase domain-containing protein 1 OS=Homo sapiens OX=9606 GN=NT5DC1 PE=1 SV=1	4	0	26.269	3.7873e+07	25426000
sp|Q5VT25|MRCKA_HUMAN	sp|Q5VT25|MRCKA_HUMAN	>sp|Q5VT25|MRCKA_HUMAN Serine/threonine-protein kinase MRCK alpha OS=Homo sapiens OX=9606 GN=CDC42BPA PE=1 SV=1	4	0.0007202	4.3678	1.03392e+07	9676800
sp|Q658P3|STEA3_HUMAN	sp|Q658P3|STEA3_HUMAN	>sp|Q658P3|STEA3_HUMAN Metalloreductase STEAP3 OS=Homo sapiens OX=9606 GN=STEAP3 PE=1 SV=2	4	0	8.4214	2.64337e+07	29437000
sp|Q6IA86|ELP2_HUMAN	sp|Q6IA86|ELP2_HUMAN	>sp|Q6IA86|ELP2_HUMAN Elongator complex protein 2 OS=Homo sapiens OX=9606 GN=ELP2 PE=1 SV=2	4	0	19.935	1.67767e+07	16418000
sp|Q6NUM9|RETST_HUMAN	sp|Q6NUM9|RETST_HUMAN	>sp|Q6NUM9|RETST_HUMAN All-trans-retinol 13,14-reductase OS=Homo sapiens OX=9606 GN=RETSAT PE=1 SV=2	4	0	11.8	5.12563e+06	13694000
sp|Q6P3W7|SCYL2_HUMAN	sp|Q6P3W7|SCYL2_HUMAN	>sp|Q6P3W7|SCYL2_HUMAN SCY1-like protein 2 OS=Homo sapiens OX=9606 GN=SCYL2 PE=1 SV=1	4	0	9.0812	8.56233e+06	22010000
sp|Q6ZNB6|NFXL1_HUMAN	sp|Q6ZNB6|NFXL1_HUMAN	>sp|Q6ZNB6|NFXL1_HUMAN NF-X1-type zinc finger protein NFXL1 OS=Homo sapiens OX=9606 GN=NFXL1 PE=1 SV=2	4	0	7.4543	1.14048e+07	18647000
sp|Q765P7|MTSS2_HUMAN	sp|Q765P7|MTSS2_HUMAN	>sp|Q765P7|MTSS2_HUMAN Protein MTSS 2 OS=Homo sapiens OX=9606 GN=MTSS2 PE=1 SV=1	4	0	27.598	1.72346e+07	22515000
sp|Q7L5N1|CSN6_HUMAN	sp|Q7L5N1|CSN6_HUMAN	>sp|Q7L5N1|CSN6_HUMAN COP9 signalosome complex subunit 6 OS=Homo sapiens OX=9606 GN=COPS6 PE=1 SV=1	4	0	12.086	2.04112e+07	32961000
sp|Q7L5N7|PCAT2_HUMAN	sp|Q7L5N7|PCAT2_HUMAN	>sp|Q7L5N7|PCAT2_HUMAN Lysophosphatidylcholine acyltransferase 2 OS=Homo sapiens OX=9606 GN=LPCAT2 PE=1 SV=1	4	0	14.862	1.5263e+07	26314000
sp|Q7Z2Z2|EFL1_HUMAN	sp|Q7Z2Z2|EFL1_HUMAN	>sp|Q7Z2Z2|EFL1_HUMAN Elongation factor-like GTPase 1 OS=Homo sapiens OX=9606 GN=EFL1 PE=1 SV=2	4	0	23.459	1.0101e+07	10185000
sp|Q7Z3U7|MON2_HUMAN	sp|Q7Z3U7|MON2_HUMAN	>sp|Q7Z3U7|MON2_HUMAN Protein MON2 homolog OS=Homo sapiens OX=9606 GN=MON2 PE=1 SV=3	4	0	14.933	1.42428e+07	9453100
sp|Q86W42|THOC6_HUMAN	sp|Q86W42|THOC6_HUMAN	>sp|Q86W42|THOC6_HUMAN THO complex subunit 6 homolog OS=Homo sapiens OX=9606 GN=THOC6 PE=1 SV=1	4	0	30.295	2.03836e+07	18936000
sp|Q86XL3|ANKL2_HUMAN	sp|Q86XL3|ANKL2_HUMAN	>sp|Q86XL3|ANKL2_HUMAN Ankyrin repeat and LEM domain-containing protein 2 OS=Homo sapiens OX=9606 GN=ANKLE2 PE=1 SV=4	4	0	22.319	1.36679e+07	18177000
sp|Q8IVF7|FMNL3_HUMAN;sp|Q96PY5|FMNL2_HUMAN	sp|Q8IVF7|FMNL3_HUMAN;sp|Q96PY5|FMNL2_HUMAN	>sp|Q8IVF7|FMNL3_HUMAN Formin-like protein 3 OS=Homo sapiens OX=9606 GN=FMNL3 PE=1 SV=3;>sp|Q96PY5|FMNL2_HUMAN Formin-like protein 2 OS=Homo sapiens OX=9606 GN=FMNL2 PE=1 SV=3	4	0	11.773	2.1584e+07	7829700
sp|Q8IWB7|WDFY1_HUMAN	sp|Q8IWB7|WDFY1_HUMAN	>sp|Q8IWB7|WDFY1_HUMAN WD repeat and FYVE domain-containing protein 1 OS=Homo sapiens OX=9606 GN=WDFY1 PE=1 SV=1	4	0	15.113	2.68377e+07	28810000
sp|Q8IWT6|LRC8A_HUMAN	sp|Q8IWT6|LRC8A_HUMAN	>sp|Q8IWT6|LRC8A_HUMAN Volume-regulated anion channel subunit LRRC8A OS=Homo sapiens OX=9606 GN=LRRC8A PE=1 SV=1	4	0	9.0041	6.13058e+06	4797800
sp|Q8IWV7|UBR1_HUMAN	sp|Q8IWV7|UBR1_HUMAN	>sp|Q8IWV7|UBR1_HUMAN E3 ubiquitin-protein ligase UBR1 OS=Homo sapiens OX=9606 GN=UBR1 PE=1 SV=1	4	0	9.5324	1.67595e+07	11447000
sp|Q8IYB3|SRRM1_HUMAN	sp|Q8IYB3|SRRM1_HUMAN	>sp|Q8IYB3|SRRM1_HUMAN Serine/arginine repetitive matrix protein 1 OS=Homo sapiens OX=9606 GN=SRRM1 PE=1 SV=2	4	0	32.214	4.64869e+07	23212000
sp|Q8IYD1|ERF3B_HUMAN	sp|Q8IYD1|ERF3B_HUMAN	>sp|Q8IYD1|ERF3B_HUMAN Eukaryotic peptide chain release factor GTP-binding subunit ERF3B OS=Homo sapiens OX=9606 GN=GSPT2 PE=1 SV=2	4	0	8.4871	2.90904e+07	37366000
sp|Q8IZL8|PELP1_HUMAN	sp|Q8IZL8|PELP1_HUMAN	>sp|Q8IZL8|PELP1_HUMAN Proline-, glutamic acid- and leucine-rich protein 1 OS=Homo sapiens OX=9606 GN=PELP1 PE=1 SV=2	4	0	19.24	1.2666e+07	15377000
sp|Q8N2F6|ARM10_HUMAN	sp|Q8N2F6|ARM10_HUMAN	>sp|Q8N2F6|ARM10_HUMAN Armadillo repeat-containing protein 10 OS=Homo sapiens OX=9606 GN=ARMC10 PE=1 SV=1	4	0	31.438	7.62096e+06	20051000
sp|Q8NB16|MLKL_HUMAN	sp|Q8NB16|MLKL_HUMAN	>sp|Q8NB16|MLKL_HUMAN Mixed lineage kinase domain-like protein OS=Homo sapiens OX=9606 GN=MLKL PE=1 SV=1	4	0	58.271	1.73161e+07	6041300
sp|Q8NBM4|UBAC2_HUMAN	sp|Q8NBM4|UBAC2_HUMAN	>sp|Q8NBM4|UBAC2_HUMAN Ubiquitin-associated domain-containing protein 2 OS=Homo sapiens OX=9606 GN=UBAC2 PE=1 SV=1	4	0	17.409	0	3863100
sp|Q8NCM8|DYHC2_HUMAN	sp|Q8NCM8|DYHC2_HUMAN	>sp|Q8NCM8|DYHC2_HUMAN Cytoplasmic dynein 2 heavy chain 1 OS=Homo sapiens OX=9606 GN=DYNC2H1 PE=1 SV=4	4	0	11.294	2.24045e+07	22205000
sp|Q8NCW5|NNRE_HUMAN	sp|Q8NCW5|NNRE_HUMAN	>sp|Q8NCW5|NNRE_HUMAN NAD(P)H-hydrate epimerase OS=Homo sapiens OX=9606 GN=NAXE PE=1 SV=2	4	0	31.212	7.52468e+07	42639000
sp|Q8NEW0|ZNT7_HUMAN	sp|Q8NEW0|ZNT7_HUMAN	>sp|Q8NEW0|ZNT7_HUMAN Zinc transporter 7 OS=Homo sapiens OX=9606 GN=SLC30A7 PE=2 SV=1	4	0	15.433	4.62241e+07	34425000
sp|Q8NFH3|NUP43_HUMAN	sp|Q8NFH3|NUP43_HUMAN	>sp|Q8NFH3|NUP43_HUMAN Nucleoporin Nup43 OS=Homo sapiens OX=9606 GN=NUP43 PE=1 SV=1	4	0	15.135	9.89217e+06	20375000
sp|Q8NFH4|NUP37_HUMAN	sp|Q8NFH4|NUP37_HUMAN	>sp|Q8NFH4|NUP37_HUMAN Nucleoporin Nup37 OS=Homo sapiens OX=9606 GN=NUP37 PE=1 SV=1	4	0	23.512	9.20614e+06	21926000
sp|Q8NHV4|NEDD1_HUMAN	sp|Q8NHV4|NEDD1_HUMAN	>sp|Q8NHV4|NEDD1_HUMAN Protein NEDD1 OS=Homo sapiens OX=9606 GN=NEDD1 PE=1 SV=1	4	0	63.85	4.8393e+06	15033000
sp|Q8NI27|THOC2_HUMAN	sp|Q8NI27|THOC2_HUMAN	>sp|Q8NI27|THOC2_HUMAN THO complex subunit 2 OS=Homo sapiens OX=9606 GN=THOC2 PE=1 SV=2	4	0	8.3806	9.44931e+06	10797000
sp|Q8TBC4|UBA3_HUMAN	sp|Q8TBC4|UBA3_HUMAN	>sp|Q8TBC4|UBA3_HUMAN NEDD8-activating enzyme E1 catalytic subunit OS=Homo sapiens OX=9606 GN=UBA3 PE=1 SV=2	4	0	13.381	1.80092e+07	11376000
sp|Q8TCD5|NT5C_HUMAN	sp|Q8TCD5|NT5C_HUMAN	>sp|Q8TCD5|NT5C_HUMAN 5(3)-deoxyribonucleotidase, cytosolic type OS=Homo sapiens OX=9606 GN=NT5C PE=1 SV=2	4	0	40.29	3.32562e+07	37279000
sp|Q8WU90|ZC3HF_HUMAN	sp|Q8WU90|ZC3HF_HUMAN	>sp|Q8WU90|ZC3HF_HUMAN Zinc finger CCCH domain-containing protein 15 OS=Homo sapiens OX=9606 GN=ZC3H15 PE=1 SV=1	4	0	48.973	3.45174e+07	31353000
sp|Q8WVV9|HNRLL_HUMAN	sp|Q8WVV9|HNRLL_HUMAN	>sp|Q8WVV9|HNRLL_HUMAN Heterogeneous nuclear ribonucleoprotein L-like OS=Homo sapiens OX=9606 GN=HNRNPLL PE=1 SV=1	4	0	7.6102	8.59309e+06	14551000
sp|Q8WXI9|P66B_HUMAN	sp|Q8WXI9|P66B_HUMAN	>sp|Q8WXI9|P66B_HUMAN Transcriptional repressor p66-beta OS=Homo sapiens OX=9606 GN=GATAD2B PE=1 SV=1	4	0	26.755	1.14978e+07	16063000
sp|Q92783|STAM1_HUMAN	sp|Q92783|STAM1_HUMAN	>sp|Q92783|STAM1_HUMAN Signal transducing adapter molecule 1 OS=Homo sapiens OX=9606 GN=STAM PE=1 SV=3	4	0	22.687	2.82332e+07	17077000
sp|Q92890|UFD1_HUMAN	sp|Q92890|UFD1_HUMAN	>sp|Q92890|UFD1_HUMAN Ubiquitin recognition factor in ER-associated degradation protein 1 OS=Homo sapiens OX=9606 GN=UFD1 PE=1 SV=3	4	0	15.665	2.95426e+07	52059000
sp|Q92896|GSLG1_HUMAN	sp|Q92896|GSLG1_HUMAN	>sp|Q92896|GSLG1_HUMAN Golgi apparatus protein 1 OS=Homo sapiens OX=9606 GN=GLG1 PE=1 SV=2	4	0	8.235	3.32987e+06	3174300
sp|Q92995|UBP13_HUMAN	sp|Q92995|UBP13_HUMAN	>sp|Q92995|UBP13_HUMAN Ubiquitin carboxyl-terminal hydrolase 13 OS=Homo sapiens OX=9606 GN=USP13 PE=1 SV=2	4	0	6.8764	0	7815600
sp|Q969N2|PIGT_HUMAN	sp|Q969N2|PIGT_HUMAN	>sp|Q969N2|PIGT_HUMAN GPI transamidase component PIG-T OS=Homo sapiens OX=9606 GN=PIGT PE=1 SV=1	4	0	81.545	1.86255e+07	14404000
sp|Q969S9|RRF2M_HUMAN	sp|Q969S9|RRF2M_HUMAN	>sp|Q969S9|RRF2M_HUMAN Ribosome-releasing factor 2, mitochondrial OS=Homo sapiens OX=9606 GN=GFM2 PE=1 SV=1	4	0	14.249	1.69408e+07	15547000
sp|Q969U7|PSMG2_HUMAN	sp|Q969U7|PSMG2_HUMAN	>sp|Q969U7|PSMG2_HUMAN Proteasome assembly chaperone 2 OS=Homo sapiens OX=9606 GN=PSMG2 PE=1 SV=1	4	0	13.729	1.63314e+07	14266000
sp|Q96CN9|GCC1_HUMAN	sp|Q96CN9|GCC1_HUMAN	>sp|Q96CN9|GCC1_HUMAN GRIP and coiled-coil domain-containing protein 1 OS=Homo sapiens OX=9606 GN=GCC1 PE=1 SV=1	4	0	18.577	0	0
sp|Q96D71|REPS1_HUMAN;sp|Q8NFH8|REPS2_HUMAN	sp|Q96D71|REPS1_HUMAN	>sp|Q96D71|REPS1_HUMAN RalBP1-associated Eps domain-containing protein 1 OS=Homo sapiens OX=9606 GN=REPS1 PE=1 SV=3	4	0	26.968	1.48384e+07	22315000
sp|Q96DZ1|ERLEC_HUMAN	sp|Q96DZ1|ERLEC_HUMAN	>sp|Q96DZ1|ERLEC_HUMAN Endoplasmic reticulum lectin 1 OS=Homo sapiens OX=9606 GN=ERLEC1 PE=1 SV=1	4	0	13.785	6.30306e+06	11940000
sp|Q96EK5|KBP_HUMAN	sp|Q96EK5|KBP_HUMAN	>sp|Q96EK5|KBP_HUMAN KIF1-binding protein OS=Homo sapiens OX=9606 GN=KIF1BP PE=1 SV=1	4	0	10.047	2.7252e+07	9579800
sp|Q96F86|EDC3_HUMAN	sp|Q96F86|EDC3_HUMAN	>sp|Q96F86|EDC3_HUMAN Enhancer of mRNA-decapping protein 3 OS=Homo sapiens OX=9606 GN=EDC3 PE=1 SV=1	4	0	12.432	1.1418e+07	13091000
sp|Q96GQ5|RUS1_HUMAN	sp|Q96GQ5|RUS1_HUMAN	>sp|Q96GQ5|RUS1_HUMAN RUS1 family protein C16orf58 OS=Homo sapiens OX=9606 GN=C16orf58 PE=1 SV=2	4	0	47.809	1.38159e+07	5194100
sp|Q96IJ6|GMPPA_HUMAN	sp|Q96IJ6|GMPPA_HUMAN	>sp|Q96IJ6|GMPPA_HUMAN Mannose-1-phosphate guanyltransferase alpha OS=Homo sapiens OX=9606 GN=GMPPA PE=1 SV=1	4	0	18.097	1.18122e+07	4788300
sp|Q96IZ0|PAWR_HUMAN	sp|Q96IZ0|PAWR_HUMAN	>sp|Q96IZ0|PAWR_HUMAN PRKC apoptosis WT1 regulator protein OS=Homo sapiens OX=9606 GN=PAWR PE=1 SV=1	4	0	24.612	7.69957e+06	14008000
sp|Q96JC1|VPS39_HUMAN	sp|Q96JC1|VPS39_HUMAN	>sp|Q96JC1|VPS39_HUMAN Vam6/Vps39-like protein OS=Homo sapiens OX=9606 GN=VPS39 PE=1 SV=2	4	0	11.551	1.00334e+07	11540000
sp|Q96JJ7|TMX3_HUMAN	sp|Q96JJ7|TMX3_HUMAN	>sp|Q96JJ7|TMX3_HUMAN Protein disulfide-isomerase TMX3 OS=Homo sapiens OX=9606 GN=TMX3 PE=1 SV=2	4	0	37.501	5.63527e+06	31868000
sp|Q96KR1|ZFR_HUMAN	sp|Q96KR1|ZFR_HUMAN	>sp|Q96KR1|ZFR_HUMAN Zinc finger RNA-binding protein OS=Homo sapiens OX=9606 GN=ZFR PE=1 SV=2	4	0	18.871	1.61295e+07	16777000
sp|Q96PU5|NED4L_HUMAN;sp|P46934|NEDD4_HUMAN	sp|Q96PU5|NED4L_HUMAN	>sp|Q96PU5|NED4L_HUMAN E3 ubiquitin-protein ligase NEDD4-like OS=Homo sapiens OX=9606 GN=NEDD4L PE=1 SV=2	4	0	13.321	1.74458e+07	10952000
sp|Q96S97|MYADM_HUMAN	sp|Q96S97|MYADM_HUMAN	>sp|Q96S97|MYADM_HUMAN Myeloid-associated differentiation marker OS=Homo sapiens OX=9606 GN=MYADM PE=1 SV=2	4	0	61.338	9.00645e+07	112000000
sp|Q96T37|RBM15_HUMAN	sp|Q96T37|RBM15_HUMAN	>sp|Q96T37|RBM15_HUMAN RNA-binding protein 15 OS=Homo sapiens OX=9606 GN=RBM15 PE=1 SV=2	4	0	17.929	2.05339e+07	20856000
sp|Q99426|TBCB_HUMAN	sp|Q99426|TBCB_HUMAN	>sp|Q99426|TBCB_HUMAN Tubulin-folding cofactor B OS=Homo sapiens OX=9606 GN=TBCB PE=1 SV=2	4	0	10.046	3.76102e+07	29313000
sp|Q99570|PI3R4_HUMAN	sp|Q99570|PI3R4_HUMAN	>sp|Q99570|PI3R4_HUMAN Phosphoinositide 3-kinase regulatory subunit 4 OS=Homo sapiens OX=9606 GN=PIK3R4 PE=1 SV=3	4	0	11.217	1.24388e+07	5440800
sp|Q99996|AKAP9_HUMAN	sp|Q99996|AKAP9_HUMAN	>sp|Q99996|AKAP9_HUMAN A-kinase anchor protein 9 OS=Homo sapiens OX=9606 GN=AKAP9 PE=1 SV=4	4	0	8.069	3.77341e+06	1746100
sp|Q9BQ52|RNZ2_HUMAN	sp|Q9BQ52|RNZ2_HUMAN	>sp|Q9BQ52|RNZ2_HUMAN Zinc phosphodiesterase ELAC protein 2 OS=Homo sapiens OX=9606 GN=ELAC2 PE=1 SV=2	4	0	10.641	9.37908e+06	6305400
sp|Q9BRA2|TXD17_HUMAN	sp|Q9BRA2|TXD17_HUMAN	>sp|Q9BRA2|TXD17_HUMAN Thioredoxin domain-containing protein 17 OS=Homo sapiens OX=9606 GN=TXNDC17 PE=1 SV=1	4	0	20.375	1.39502e+08	140600000
sp|Q9BSH4|TACO1_HUMAN	sp|Q9BSH4|TACO1_HUMAN	>sp|Q9BSH4|TACO1_HUMAN Translational activator of cytochrome c oxidase 1 OS=Homo sapiens OX=9606 GN=TACO1 PE=1 SV=1	4	0	62.148	4.72695e+07	44798000
sp|Q9BSJ8|ESYT1_HUMAN	sp|Q9BSJ8|ESYT1_HUMAN	>sp|Q9BSJ8|ESYT1_HUMAN Extended synaptotagmin-1 OS=Homo sapiens OX=9606 GN=ESYT1 PE=1 SV=1	4	0	14.775	1.37838e+07	17518000
sp|Q9BU76|MMTA2_HUMAN	sp|Q9BU76|MMTA2_HUMAN	>sp|Q9BU76|MMTA2_HUMAN Multiple myeloma tumor-associated protein 2 OS=Homo sapiens OX=9606 GN=MMTAG2 PE=1 SV=1	4	0	10.912	2.88173e+07	27988000
sp|Q9BV38|WDR18_HUMAN	sp|Q9BV38|WDR18_HUMAN	>sp|Q9BV38|WDR18_HUMAN WD repeat-containing protein 18 OS=Homo sapiens OX=9606 GN=WDR18 PE=1 SV=2	4	0	16.104	2.51966e+07	34975000
sp|Q9BVA0|KTNB1_HUMAN	sp|Q9BVA0|KTNB1_HUMAN	>sp|Q9BVA0|KTNB1_HUMAN Katanin p80 WD40 repeat-containing subunit B1 OS=Homo sapiens OX=9606 GN=KATNB1 PE=1 SV=1	4	0	8	3.06076e+06	4183600
sp|Q9BW92|SYTM_HUMAN	sp|Q9BW92|SYTM_HUMAN	>sp|Q9BW92|SYTM_HUMAN Threonine--tRNA ligase, mitochondrial OS=Homo sapiens OX=9606 GN=TARS2 PE=1 SV=1	4	0	7.8471	7.97167e+06	23422000
sp|Q9BXY0|MAK16_HUMAN	sp|Q9BXY0|MAK16_HUMAN	>sp|Q9BXY0|MAK16_HUMAN Protein MAK16 homolog OS=Homo sapiens OX=9606 GN=MAK16 PE=1 SV=2	4	0	8.5717	2.32239e+07	24811000
sp|Q9BY77|PDIP3_HUMAN	sp|Q9BY77|PDIP3_HUMAN	>sp|Q9BY77|PDIP3_HUMAN Polymerase delta-interacting protein 3 OS=Homo sapiens OX=9606 GN=POLDIP3 PE=1 SV=2	4	0	14.187	2.10882e+07	20537000
sp|Q9BYN8|RT26_HUMAN	sp|Q9BYN8|RT26_HUMAN	>sp|Q9BYN8|RT26_HUMAN 28S ribosomal protein S26, mitochondrial OS=Homo sapiens OX=9606 GN=MRPS26 PE=1 SV=1	4	0	13.216	2.70213e+07	14435000
sp|Q9BZL4|PP12C_HUMAN	sp|Q9BZL4|PP12C_HUMAN	>sp|Q9BZL4|PP12C_HUMAN Protein phosphatase 1 regulatory subunit 12C OS=Homo sapiens OX=9606 GN=PPP1R12C PE=1 SV=1	4	0	12.953	6.2287e+06	8704900
sp|Q9H0C8|ILKAP_HUMAN	sp|Q9H0C8|ILKAP_HUMAN	>sp|Q9H0C8|ILKAP_HUMAN Integrin-linked kinase-associated serine/threonine phosphatase 2C OS=Homo sapiens OX=9606 GN=ILKAP PE=1 SV=1	4	0	9.1512	3.32837e+07	42408000
sp|Q9H0R4|HDHD2_HUMAN	sp|Q9H0R4|HDHD2_HUMAN	>sp|Q9H0R4|HDHD2_HUMAN Haloacid dehalogenase-like hydrolase domain-containing protein 2 OS=Homo sapiens OX=9606 GN=HDHD2 PE=1 SV=1	4	0	41.561	3.01738e+07	41009000
sp|Q9H1I8|ASCC2_HUMAN	sp|Q9H1I8|ASCC2_HUMAN	>sp|Q9H1I8|ASCC2_HUMAN Activating signal cointegrator 1 complex subunit 2 OS=Homo sapiens OX=9606 GN=ASCC2 PE=1 SV=3	4	0	39.436	1.43897e+07	11610000
sp|Q9H2D1|MFTC_HUMAN	sp|Q9H2D1|MFTC_HUMAN	>sp|Q9H2D1|MFTC_HUMAN Mitochondrial folate transporter/carrier OS=Homo sapiens OX=9606 GN=SLC25A32 PE=1 SV=2	4	0	30.234	2.33834e+07	7430500
sp|Q9H307|PININ_HUMAN	sp|Q9H307|PININ_HUMAN	>sp|Q9H307|PININ_HUMAN Pinin OS=Homo sapiens OX=9606 GN=PNN PE=1 SV=5	4	0	11.139	3.03425e+07	18195000
sp|Q9H3P7|GCP60_HUMAN	sp|Q9H3P7|GCP60_HUMAN	>sp|Q9H3P7|GCP60_HUMAN Golgi resident protein GCP60 OS=Homo sapiens OX=9606 GN=ACBD3 PE=1 SV=4	4	0	75.601	3.69584e+07	51800000
sp|Q9H4A6|GOLP3_HUMAN	sp|Q9H4A6|GOLP3_HUMAN	>sp|Q9H4A6|GOLP3_HUMAN Golgi phosphoprotein 3 OS=Homo sapiens OX=9606 GN=GOLPH3 PE=1 SV=1	4	0	12.82	2.30437e+07	21069000
sp|Q9H4L5|OSBL3_HUMAN	sp|Q9H4L5|OSBL3_HUMAN	>sp|Q9H4L5|OSBL3_HUMAN Oxysterol-binding protein-related protein 3 OS=Homo sapiens OX=9606 GN=OSBPL3 PE=1 SV=1	4	0	9.9813	4.90873e+06	3818700
sp|Q9H7D0|DOCK5_HUMAN	sp|Q9H7D0|DOCK5_HUMAN	>sp|Q9H7D0|DOCK5_HUMAN Dedicator of cytokinesis protein 5 OS=Homo sapiens OX=9606 GN=DOCK5 PE=1 SV=3	4	0	15.648	6.11956e+06	6894000
sp|Q9H9E3|COG4_HUMAN	sp|Q9H9E3|COG4_HUMAN	>sp|Q9H9E3|COG4_HUMAN Conserved oligomeric Golgi complex subunit 4 OS=Homo sapiens OX=9606 GN=COG4 PE=1 SV=3	4	0	10.203	7.74169e+06	12233000
sp|Q9NP79|VTA1_HUMAN	sp|Q9NP79|VTA1_HUMAN	>sp|Q9NP79|VTA1_HUMAN Vacuolar protein sorting-associated protein VTA1 homolog OS=Homo sapiens OX=9606 GN=VTA1 PE=1 SV=1	4	0	49.058	4.54919e+07	51271000
sp|Q9NQC3|RTN4_HUMAN	sp|Q9NQC3|RTN4_HUMAN	>sp|Q9NQC3|RTN4_HUMAN Reticulon-4 OS=Homo sapiens OX=9606 GN=RTN4 PE=1 SV=2	4	0	15.64	2.50222e+07	27829000
sp|Q9NQT8|KI13B_HUMAN;sp|Q9H1H9|KI13A_HUMAN;sp|Q96L93|KI16B_HUMAN	sp|Q9NQT8|KI13B_HUMAN;sp|Q9H1H9|KI13A_HUMAN	>sp|Q9NQT8|KI13B_HUMAN Kinesin-like protein KIF13B OS=Homo sapiens OX=9606 GN=KIF13B PE=1 SV=2;>sp|Q9H1H9|KI13A_HUMAN Kinesin-like protein KIF13A OS=Homo sapiens OX=9606 GN=KIF13A PE=1 SV=2	4	0	11.271	1.02206e+07	8191800
sp|Q9NRV9|HEBP1_HUMAN	sp|Q9NRV9|HEBP1_HUMAN	>sp|Q9NRV9|HEBP1_HUMAN Heme-binding protein 1 OS=Homo sapiens OX=9606 GN=HEBP1 PE=1 SV=1	4	0	25.924	1.96469e+07	11517000
sp|Q9NRY4|RHG35_HUMAN	sp|Q9NRY4|RHG35_HUMAN	>sp|Q9NRY4|RHG35_HUMAN Rho GTPase-activating protein 35 OS=Homo sapiens OX=9606 GN=ARHGAP35 PE=1 SV=3	4	0	24.211	5.01477e+06	15330000
sp|Q9NVJ2|ARL8B_HUMAN	sp|Q9NVJ2|ARL8B_HUMAN	>sp|Q9NVJ2|ARL8B_HUMAN ADP-ribosylation factor-like protein 8B OS=Homo sapiens OX=9606 GN=ARL8B PE=1 SV=1	4	0	41.844	4.55848e+07	33759000
sp|Q9NWV4|CZIB_HUMAN	sp|Q9NWV4|CZIB_HUMAN	>sp|Q9NWV4|CZIB_HUMAN CXXC motif containing zinc binding protein OS=Homo sapiens OX=9606 GN=CZIB PE=1 SV=1	4	0	49.126	9.70844e+07	118400000
sp|Q9NXW2|DJB12_HUMAN	sp|Q9NXW2|DJB12_HUMAN	>sp|Q9NXW2|DJB12_HUMAN DnaJ homolog subfamily B member 12 OS=Homo sapiens OX=9606 GN=DNAJB12 PE=1 SV=5	4	0	7.2642	1.9205e+07	16248000
sp|Q9NZN5|ARHGC_HUMAN	sp|Q9NZN5|ARHGC_HUMAN	>sp|Q9NZN5|ARHGC_HUMAN Rho guanine nucleotide exchange factor 12 OS=Homo sapiens OX=9606 GN=ARHGEF12 PE=1 SV=1	4	0	11.979	1.02017e+07	13084000
sp|Q9P0J0|NDUAD_HUMAN	sp|Q9P0J0|NDUAD_HUMAN	>sp|Q9P0J0|NDUAD_HUMAN NADH dehydrogenase [ubiquinone] 1 alpha subcomplex subunit 13 OS=Homo sapiens OX=9606 GN=NDUFA13 PE=1 SV=3	4	0	63.372	3.41238e+07	27356000
sp|Q9P258|RCC2_HUMAN	sp|Q9P258|RCC2_HUMAN	>sp|Q9P258|RCC2_HUMAN Protein RCC2 OS=Homo sapiens OX=9606 GN=RCC2 PE=1 SV=2	4	0	13.87	2.73185e+07	28545000
sp|Q9P287|BCCIP_HUMAN	sp|Q9P287|BCCIP_HUMAN	>sp|Q9P287|BCCIP_HUMAN BRCA2 and CDKN1A-interacting protein OS=Homo sapiens OX=9606 GN=BCCIP PE=1 SV=1	4	0	25.36	7.72918e+07	63601000
sp|Q9UBC2|EP15R_HUMAN	sp|Q9UBC2|EP15R_HUMAN	>sp|Q9UBC2|EP15R_HUMAN Epidermal growth factor receptor substrate 15-like 1 OS=Homo sapiens OX=9606 GN=EPS15L1 PE=1 SV=1	4	0	30.223	5.82256e+06	6441500
sp|Q9UBQ5|EIF3K_HUMAN	sp|Q9UBQ5|EIF3K_HUMAN	>sp|Q9UBQ5|EIF3K_HUMAN Eukaryotic translation initiation factor 3 subunit K OS=Homo sapiens OX=9606 GN=EIF3K PE=1 SV=1	4	0	21.861	9.43887e+07	84368000
sp|Q9UBW8|CSN7A_HUMAN	sp|Q9UBW8|CSN7A_HUMAN	>sp|Q9UBW8|CSN7A_HUMAN COP9 signalosome complex subunit 7a OS=Homo sapiens OX=9606 GN=COPS7A PE=1 SV=1	4	0	28.666	7.9206e+06	6033500
sp|Q9UBX3|DIC_HUMAN	sp|Q9UBX3|DIC_HUMAN	>sp|Q9UBX3|DIC_HUMAN Mitochondrial dicarboxylate carrier OS=Homo sapiens OX=9606 GN=SLC25A10 PE=1 SV=2	4	0	15.606	2.27924e+07	9443500
sp|Q9UGR2|Z3H7B_HUMAN	sp|Q9UGR2|Z3H7B_HUMAN	>sp|Q9UGR2|Z3H7B_HUMAN Zinc finger CCCH domain-containing protein 7B OS=Homo sapiens OX=9606 GN=ZC3H7B PE=1 SV=2	4	0	13.218	9.02459e+06	9723100
sp|Q9UHJ6|SHPK_HUMAN	sp|Q9UHJ6|SHPK_HUMAN	>sp|Q9UHJ6|SHPK_HUMAN Sedoheptulokinase OS=Homo sapiens OX=9606 GN=SHPK PE=1 SV=3	4	0	26.787	1.89285e+07	13775000
sp|Q9UHY7|ENOPH_HUMAN	sp|Q9UHY7|ENOPH_HUMAN	>sp|Q9UHY7|ENOPH_HUMAN Enolase-phosphatase E1 OS=Homo sapiens OX=9606 GN=ENOPH1 PE=1 SV=1	4	0	14.348	3.9646e+07	26284000
sp|Q9UJX2|CDC23_HUMAN	sp|Q9UJX2|CDC23_HUMAN	>sp|Q9UJX2|CDC23_HUMAN Cell division cycle protein 23 homolog OS=Homo sapiens OX=9606 GN=CDC23 PE=1 SV=3	4	0	10.71	1.00225e+07	11657000
sp|Q9UJY4|GGA2_HUMAN	sp|Q9UJY4|GGA2_HUMAN	>sp|Q9UJY4|GGA2_HUMAN ADP-ribosylation factor-binding protein GGA2 OS=Homo sapiens OX=9606 GN=GGA2 PE=1 SV=3	4	0	58.585	1.70062e+07	16506000
sp|Q9UKV5|AMFR_HUMAN	sp|Q9UKV5|AMFR_HUMAN	>sp|Q9UKV5|AMFR_HUMAN E3 ubiquitin-protein ligase AMFR OS=Homo sapiens OX=9606 GN=AMFR PE=1 SV=2	4	0	25.556	1.30551e+07	10708000
sp|Q9UKZ1|CNO11_HUMAN	sp|Q9UKZ1|CNO11_HUMAN	>sp|Q9UKZ1|CNO11_HUMAN CCR4-NOT transcription complex subunit 11 OS=Homo sapiens OX=9606 GN=CNOT11 PE=1 SV=1	4	0	13.723	8.29001e+06	17800000
sp|Q9ULC3|RAB23_HUMAN	sp|Q9ULC3|RAB23_HUMAN	>sp|Q9ULC3|RAB23_HUMAN Ras-related protein Rab-23 OS=Homo sapiens OX=9606 GN=RAB23 PE=1 SV=1	4	0	44.264	2.17722e+07	21059000
sp|Q9UN86|G3BP2_HUMAN	sp|Q9UN86|G3BP2_HUMAN	>sp|Q9UN86|G3BP2_HUMAN Ras GTPase-activating protein-binding protein 2 OS=Homo sapiens OX=9606 GN=G3BP2 PE=1 SV=2	4	0	22.12	4.6045e+07	53974000
sp|Q9UNE7|CHIP_HUMAN	sp|Q9UNE7|CHIP_HUMAN	>sp|Q9UNE7|CHIP_HUMAN E3 ubiquitin-protein ligase CHIP OS=Homo sapiens OX=9606 GN=STUB1 PE=1 SV=2	4	0	16.3	5.44167e+07	47998000
sp|Q9UNF0|PACN2_HUMAN	sp|Q9UNF0|PACN2_HUMAN	>sp|Q9UNF0|PACN2_HUMAN Protein kinase C and casein kinase substrate in neurons protein 2 OS=Homo sapiens OX=9606 GN=PACSIN2 PE=1 SV=2	4	0	27.437	6.29744e+07	73143000
sp|Q9UPN7|PP6R1_HUMAN	sp|Q9UPN7|PP6R1_HUMAN	>sp|Q9UPN7|PP6R1_HUMAN Serine/threonine-protein phosphatase 6 regulatory subunit 1 OS=Homo sapiens OX=9606 GN=PPP6R1 PE=1 SV=5	4	0	45.186	2.47502e+07	9780900
sp|Q9Y223|GLCNE_HUMAN	sp|Q9Y223|GLCNE_HUMAN	>sp|Q9Y223|GLCNE_HUMAN Bifunctional UDP-N-acetylglucosamine 2-epimerase/N-acetylmannosamine kinase OS=Homo sapiens OX=9606 GN=GNE PE=1 SV=1	4	0	9.5159	1.63096e+07	20571000
sp|Q9Y266|NUDC_HUMAN	sp|Q9Y266|NUDC_HUMAN	>sp|Q9Y266|NUDC_HUMAN Nuclear migration protein nudC OS=Homo sapiens OX=9606 GN=NUDC PE=1 SV=1	4	0	10.655	1.0094e+06	24350000
sp|Q9Y2X7|GIT1_HUMAN	sp|Q9Y2X7|GIT1_HUMAN	>sp|Q9Y2X7|GIT1_HUMAN ARF GTPase-activating protein GIT1 OS=Homo sapiens OX=9606 GN=GIT1 PE=1 SV=2	4	0	18.664	1.65403e+07	41542000
sp|Q9Y2Z4|SYYM_HUMAN	sp|Q9Y2Z4|SYYM_HUMAN	>sp|Q9Y2Z4|SYYM_HUMAN Tyrosine--tRNA ligase, mitochondrial OS=Homo sapiens OX=9606 GN=YARS2 PE=1 SV=2	4	0	85.893	3.63375e+07	39728000
sp|Q9Y3A4|RRP7A_HUMAN;sp|Q9NSQ0|RRP7B_HUMAN	sp|Q9Y3A4|RRP7A_HUMAN	>sp|Q9Y3A4|RRP7A_HUMAN Ribosomal RNA-processing protein 7 homolog A OS=Homo sapiens OX=9606 GN=RRP7A PE=1 SV=2	4	0	12.156	2.30437e+07	21553000
sp|Q9Y3E5|PTH2_HUMAN	sp|Q9Y3E5|PTH2_HUMAN	>sp|Q9Y3E5|PTH2_HUMAN Peptidyl-tRNA hydrolase 2, mitochondrial OS=Homo sapiens OX=9606 GN=PTRH2 PE=1 SV=1	4	0	73.259	4.27285e+07	51632000
sp|Q9Y3Z3|SAMH1_HUMAN	sp|Q9Y3Z3|SAMH1_HUMAN	>sp|Q9Y3Z3|SAMH1_HUMAN Deoxynucleoside triphosphate triphosphohydrolase SAMHD1 OS=Homo sapiens OX=9606 GN=SAMHD1 PE=1 SV=2	4	0	17.22	1.11774e+07	20461000
sp|Q9Y4F1|FARP1_HUMAN	sp|Q9Y4F1|FARP1_HUMAN	>sp|Q9Y4F1|FARP1_HUMAN FERM, ARHGEF and pleckstrin domain-containing protein 1 OS=Homo sapiens OX=9606 GN=FARP1 PE=1 SV=1	4	0	13.163	6.73754e+06	13224000
sp|Q9Y4H2|IRS2_HUMAN	sp|Q9Y4H2|IRS2_HUMAN	>sp|Q9Y4H2|IRS2_HUMAN Insulin receptor substrate 2 OS=Homo sapiens OX=9606 GN=IRS2 PE=1 SV=2	4	0	9.7567	5.94972e+08	2841200
sp|Q9Y4K1|CRBG1_HUMAN	sp|Q9Y4K1|CRBG1_HUMAN	>sp|Q9Y4K1|CRBG1_HUMAN Beta/gamma crystallin domain-containing protein 1 OS=Homo sapiens OX=9606 GN=CRYBG1 PE=1 SV=3	4	0	9.2492	2.49361e+06	6932900
sp|Q9Y4P3|TBL2_HUMAN	sp|Q9Y4P3|TBL2_HUMAN	>sp|Q9Y4P3|TBL2_HUMAN Transducin beta-like protein 2 OS=Homo sapiens OX=9606 GN=TBL2 PE=1 SV=1	4	0	59.459	1.29334e+07	19516000
sp|Q9Y5L0|TNPO3_HUMAN	sp|Q9Y5L0|TNPO3_HUMAN	>sp|Q9Y5L0|TNPO3_HUMAN Transportin-3 OS=Homo sapiens OX=9606 GN=TNPO3 PE=1 SV=3	4	0	31.767	2.614e+07	25619000
sp|Q9Y5P6|GMPPB_HUMAN	sp|Q9Y5P6|GMPPB_HUMAN	>sp|Q9Y5P6|GMPPB_HUMAN Mannose-1-phosphate guanyltransferase beta OS=Homo sapiens OX=9606 GN=GMPPB PE=1 SV=2	4	0	9.2429	2.64475e+07	27832000
sp|Q9Y5Y2|NUBP2_HUMAN	sp|Q9Y5Y2|NUBP2_HUMAN	>sp|Q9Y5Y2|NUBP2_HUMAN Cytosolic Fe-S cluster assembly factor NUBP2 OS=Homo sapiens OX=9606 GN=NUBP2 PE=1 SV=1	4	0	42.379	2.79773e+07	25507000
sp|A6NDG6|PGP_HUMAN	sp|A6NDG6|PGP_HUMAN	>sp|A6NDG6|PGP_HUMAN Glycerol-3-phosphate phosphatase OS=Homo sapiens OX=9606 GN=PGP PE=1 SV=1	3	0	32.171	1.28244e+07	15438000
sp|P0CG08|GPHRB_HUMAN;sp|B7ZAQ6|GPHRA_HUMAN	sp|P0CG08|GPHRB_HUMAN;sp|B7ZAQ6|GPHRA_HUMAN	>sp|P0CG08|GPHRB_HUMAN Golgi pH regulator B OS=Homo sapiens OX=9606 GN=GPR89B PE=1 SV=1;>sp|B7ZAQ6|GPHRA_HUMAN Golgi pH regulator A OS=Homo sapiens OX=9606 GN=GPR89A PE=1 SV=2	3	0	8.9348	2.89309e+07	24439000
sp|Q13765|NACA_HUMAN;sp|E9PAV3|NACAM_HUMAN	sp|Q13765|NACA_HUMAN;sp|E9PAV3|NACAM_HUMAN	>sp|Q13765|NACA_HUMAN Nascent polypeptide-associated complex subunit alpha OS=Homo sapiens OX=9606 GN=NACA PE=1 SV=1;>sp|E9PAV3|NACAM_HUMAN Nascent polypeptide-associated complex subunit alpha, muscle-specific form OS=Homo sapiens OX=9606 GN=NACA PE=1 SV=1	3	0	129.9	4.55183e+07	44705000
sp|O00468|AGRIN_HUMAN	sp|O00468|AGRIN_HUMAN	>sp|O00468|AGRIN_HUMAN Agrin OS=Homo sapiens OX=9606 GN=AGRN PE=1 SV=6	3	0	7.602	4.33424e+06	9548500
sp|O00483|NDUA4_HUMAN	sp|O00483|NDUA4_HUMAN	>sp|O00483|NDUA4_HUMAN Cytochrome c oxidase subunit NDUFA4 OS=Homo sapiens OX=9606 GN=NDUFA4 PE=1 SV=1	3	0	8.1985	4.10277e+07	47165000
sp|Q9P289|STK26_HUMAN;sp|O00506|STK25_HUMAN;sp|Q9Y6E0|STK24_HUMAN	sp|Q9P289|STK26_HUMAN;sp|O00506|STK25_HUMAN	>sp|Q9P289|STK26_HUMAN Serine/threonine-protein kinase 26 OS=Homo sapiens OX=9606 GN=STK26 PE=1 SV=2;>sp|O00506|STK25_HUMAN Serine/threonine-protein kinase 25 OS=Homo sapiens OX=9606 GN=STK25 PE=1 SV=1	3	0	11.55	3.26824e+07	23998000
sp|O00560|SDCB1_HUMAN	sp|O00560|SDCB1_HUMAN	>sp|O00560|SDCB1_HUMAN Syntenin-1 OS=Homo sapiens OX=9606 GN=SDCBP PE=1 SV=1	3	0	66.455	2.44564e+07	16761000
sp|O14639|ABLM1_HUMAN	sp|O14639|ABLM1_HUMAN	>sp|O14639|ABLM1_HUMAN Actin-binding LIM protein 1 OS=Homo sapiens OX=9606 GN=ABLIM1 PE=1 SV=3	3	0	10.141	0	3044700
sp|O14735|CDIPT_HUMAN	sp|O14735|CDIPT_HUMAN	>sp|O14735|CDIPT_HUMAN CDP-diacylglycerol--inositol 3-phosphatidyltransferase OS=Homo sapiens OX=9606 GN=CDIPT PE=1 SV=1	3	0	13.239	3.26595e+07	34184000
sp|O14874|BCKD_HUMAN	sp|O14874|BCKD_HUMAN	>sp|O14874|BCKD_HUMAN [3-methyl-2-oxobutanoate dehydrogenase [lipoamide]] kinase, mitochondrial OS=Homo sapiens OX=9606 GN=BCKDK PE=1 SV=2	3	0	17.933	1.62006e+07	27577000
sp|O14879|IFIT3_HUMAN	sp|O14879|IFIT3_HUMAN	>sp|O14879|IFIT3_HUMAN Interferon-induced protein with tetratricopeptide repeats 3 OS=Homo sapiens OX=9606 GN=IFIT3 PE=1 SV=1	3	0	12.094	1.03559e+07	12193000
sp|O14880|MGST3_HUMAN	sp|O14880|MGST3_HUMAN	>sp|O14880|MGST3_HUMAN Microsomal glutathione S-transferase 3 OS=Homo sapiens OX=9606 GN=MGST3 PE=1 SV=1	3	0	22.415	4.19481e+07	33631000
sp|O14920|IKKB_HUMAN	sp|O14920|IKKB_HUMAN	>sp|O14920|IKKB_HUMAN Inhibitor of nuclear factor kappa-B kinase subunit beta OS=Homo sapiens OX=9606 GN=IKBKB PE=1 SV=1	3	0	6.6212	2.95529e+07	29837000
sp|O14976|GAK_HUMAN	sp|O14976|GAK_HUMAN	>sp|O14976|GAK_HUMAN Cyclin-G-associated kinase OS=Homo sapiens OX=9606 GN=GAK PE=1 SV=2	3	0	21.521	5.29639e+06	1065200
sp|O14981|BTAF1_HUMAN	sp|O14981|BTAF1_HUMAN	>sp|O14981|BTAF1_HUMAN TATA-binding protein-associated factor 172 OS=Homo sapiens OX=9606 GN=BTAF1 PE=1 SV=2	3	0	8.7948	3.22899e+06	4467200
sp|O15111|IKKA_HUMAN	sp|O15111|IKKA_HUMAN	>sp|O15111|IKKA_HUMAN Inhibitor of nuclear factor kappa-B kinase subunit alpha OS=Homo sapiens OX=9606 GN=CHUK PE=1 SV=2	3	0	6.9548	3.75769e+06	3002700
sp|O15126|SCAM1_HUMAN	sp|O15126|SCAM1_HUMAN	>sp|O15126|SCAM1_HUMAN Secretory carrier-associated membrane protein 1 OS=Homo sapiens OX=9606 GN=SCAMP1 PE=1 SV=2	3	0	48.677	2.25181e+07	40456000
sp|O15127|SCAM2_HUMAN	sp|O15127|SCAM2_HUMAN	>sp|O15127|SCAM2_HUMAN Secretory carrier-associated membrane protein 2 OS=Homo sapiens OX=9606 GN=SCAMP2 PE=1 SV=2	3	0	14.209	4.11448e+07	44725000
sp|O15258|RER1_HUMAN	sp|O15258|RER1_HUMAN	>sp|O15258|RER1_HUMAN Protein RER1 OS=Homo sapiens OX=9606 GN=RER1 PE=1 SV=1	3	0	20.906	3.38736e+07	58601000
sp|O15484|CAN5_HUMAN	sp|O15484|CAN5_HUMAN	>sp|O15484|CAN5_HUMAN Calpain-5 OS=Homo sapiens OX=9606 GN=CAPN5 PE=1 SV=2	3	0	10.26	1.15586e+07	14786000
sp|O43149|ZZEF1_HUMAN	sp|O43149|ZZEF1_HUMAN	>sp|O43149|ZZEF1_HUMAN Zinc finger ZZ-type and EF-hand domain-containing protein 1 OS=Homo sapiens OX=9606 GN=ZZEF1 PE=1 SV=6	3	0	7.0658	3.20822e+06	3147300
sp|O43169|CYB5B_HUMAN	sp|O43169|CYB5B_HUMAN	>sp|O43169|CYB5B_HUMAN Cytochrome b5 type B OS=Homo sapiens OX=9606 GN=CYB5B PE=1 SV=3	3	0	22.677	6.50263e+07	57280000
sp|O43301|HS12A_HUMAN	sp|O43301|HS12A_HUMAN	>sp|O43301|HS12A_HUMAN Heat shock 70 kDa protein 12A OS=Homo sapiens OX=9606 GN=HSPA12A PE=1 SV=2	3	0	8.5534	0	0
sp|O43310|CTIF_HUMAN	sp|O43310|CTIF_HUMAN	>sp|O43310|CTIF_HUMAN CBP80/20-dependent translation initiation factor OS=Homo sapiens OX=9606 GN=CTIF PE=1 SV=1	3	0	10.818	6.93355e+06	7515500
sp|O43318|M3K7_HUMAN	sp|O43318|M3K7_HUMAN	>sp|O43318|M3K7_HUMAN Mitogen-activated protein kinase kinase kinase 7 OS=Homo sapiens OX=9606 GN=MAP3K7 PE=1 SV=1	3	0	11.316	6.94319e+06	15370000
sp|O43324|MCA3_HUMAN	sp|O43324|MCA3_HUMAN	>sp|O43324|MCA3_HUMAN Eukaryotic translation elongation factor 1 epsilon-1 OS=Homo sapiens OX=9606 GN=EEF1E1 PE=1 SV=1	3	0	16.623	3.43281e+07	43745000
sp|O43399|TPD54_HUMAN	sp|O43399|TPD54_HUMAN	>sp|O43399|TPD54_HUMAN Tumor protein D54 OS=Homo sapiens OX=9606 GN=TPD52L2 PE=1 SV=2	3	0	10.132	4.50661e+06	11911000
sp|O43427|FIBP_HUMAN	sp|O43427|FIBP_HUMAN	>sp|O43427|FIBP_HUMAN Acidic fibroblast growth factor intracellular-binding protein OS=Homo sapiens OX=9606 GN=FIBP PE=1 SV=3	3	0	8.392	2.36933e+07	18574000
sp|O43488|ARK72_HUMAN	sp|O43488|ARK72_HUMAN	>sp|O43488|ARK72_HUMAN Aflatoxin B1 aldehyde reductase member 2 OS=Homo sapiens OX=9606 GN=AKR7A2 PE=1 SV=3	3	0	14.703	2.12638e+07	19442000
sp|O43617|TPPC3_HUMAN	sp|O43617|TPPC3_HUMAN	>sp|O43617|TPPC3_HUMAN Trafficking protein particle complex subunit 3 OS=Homo sapiens OX=9606 GN=TRAPPC3 PE=1 SV=1	3	0	7.2571	1.51012e+07	12593000
sp|O43896|KIF1C_HUMAN	sp|O43896|KIF1C_HUMAN	>sp|O43896|KIF1C_HUMAN Kinesin-like protein KIF1C OS=Homo sapiens OX=9606 GN=KIF1C PE=1 SV=3	3	0.0073529	2.8183	1.49681e+07	8552100
sp|O60573|IF4E2_HUMAN	sp|O60573|IF4E2_HUMAN	>sp|O60573|IF4E2_HUMAN Eukaryotic translation initiation factor 4E type 2 OS=Homo sapiens OX=9606 GN=EIF4E2 PE=1 SV=1	3	0	15.917	3.29785e+07	31676000
sp|O60784|TOM1_HUMAN	sp|O60784|TOM1_HUMAN	>sp|O60784|TOM1_HUMAN Target of Myb protein 1 OS=Homo sapiens OX=9606 GN=TOM1 PE=1 SV=2	3	0	16.98	0	8641900
sp|O60841|IF2P_HUMAN	sp|O60841|IF2P_HUMAN	>sp|O60841|IF2P_HUMAN Eukaryotic translation initiation factor 5B OS=Homo sapiens OX=9606 GN=EIF5B PE=1 SV=4	3	0	12.147	5.17394e+06	5964400
sp|O75116|ROCK2_HUMAN	sp|O75116|ROCK2_HUMAN	>sp|O75116|ROCK2_HUMAN Rho-associated protein kinase 2 OS=Homo sapiens OX=9606 GN=ROCK2 PE=1 SV=4	3	0	7.0654	2.96459e+06	8160700
sp|O75146|HIP1R_HUMAN	sp|O75146|HIP1R_HUMAN	>sp|O75146|HIP1R_HUMAN Huntingtin-interacting protein 1-related protein OS=Homo sapiens OX=9606 GN=HIP1R PE=1 SV=2	3	0	19.707	8.86782e+06	5191700
sp|O75312|ZPR1_HUMAN	sp|O75312|ZPR1_HUMAN	>sp|O75312|ZPR1_HUMAN Zinc finger protein ZPR1 OS=Homo sapiens OX=9606 GN=ZPR1 PE=1 SV=1	3	0	18.286	2.05512e+07	9914500
sp|O75348|VATG1_HUMAN	sp|O75348|VATG1_HUMAN	>sp|O75348|VATG1_HUMAN V-type proton ATPase subunit G 1 OS=Homo sapiens OX=9606 GN=ATP6V1G1 PE=1 SV=3	3	0	21.913	9.36232e+06	854590
sp|O75427|LRCH4_HUMAN	sp|O75427|LRCH4_HUMAN	>sp|O75427|LRCH4_HUMAN Leucine-rich repeat and calponin homology domain-containing protein 4 OS=Homo sapiens OX=9606 GN=LRCH4 PE=1 SV=2	3	0	10.59	6.52443e+06	5665800
sp|O75531|BAF_HUMAN	sp|O75531|BAF_HUMAN	>sp|O75531|BAF_HUMAN Barrier-to-autointegration factor OS=Homo sapiens OX=9606 GN=BANF1 PE=1 SV=1	3	0	25.694	2.96068e+07	21961000
sp|O75608|LYPA1_HUMAN	sp|O75608|LYPA1_HUMAN	>sp|O75608|LYPA1_HUMAN Acyl-protein thioesterase 1 OS=Homo sapiens OX=9606 GN=LYPLA1 PE=1 SV=1	3	0	23.688	2.27362e+07	20045000
sp|O75616|ERAL1_HUMAN	sp|O75616|ERAL1_HUMAN	>sp|O75616|ERAL1_HUMAN GTPase Era, mitochondrial OS=Homo sapiens OX=9606 GN=ERAL1 PE=1 SV=2	3	0	10.807	7.3297e+06	9871500
sp|O75822|EIF3J_HUMAN	sp|O75822|EIF3J_HUMAN	>sp|O75822|EIF3J_HUMAN Eukaryotic translation initiation factor 3 subunit J OS=Homo sapiens OX=9606 GN=EIF3J PE=1 SV=2	3	0	7.6517	0	3923900
sp|O75886|STAM2_HUMAN	sp|O75886|STAM2_HUMAN	>sp|O75886|STAM2_HUMAN Signal transducing adapter molecule 2 OS=Homo sapiens OX=9606 GN=STAM2 PE=1 SV=1	3	0.00038956	5.8519	7.54556e+06	10614000
sp|O76071|CIAO1_HUMAN	sp|O76071|CIAO1_HUMAN	>sp|O76071|CIAO1_HUMAN Probable cytosolic iron-sulfur protein assembly protein CIAO1 OS=Homo sapiens OX=9606 GN=CIAO1 PE=1 SV=1	3	0	22.109	0	6659100
sp|O95084|PRS23_HUMAN	sp|O95084|PRS23_HUMAN	>sp|O95084|PRS23_HUMAN Serine protease 23 OS=Homo sapiens OX=9606 GN=PRSS23 PE=1 SV=1	3	0	8.0237	1.29472e+07	21245000
sp|O95219|SNX4_HUMAN	sp|O95219|SNX4_HUMAN	>sp|O95219|SNX4_HUMAN Sorting nexin-4 OS=Homo sapiens OX=9606 GN=SNX4 PE=1 SV=1	3	0	19.235	8.47971e+06	10606000
sp|O95232|LC7L3_HUMAN	sp|O95232|LC7L3_HUMAN	>sp|O95232|LC7L3_HUMAN Luc7-like protein 3 OS=Homo sapiens OX=9606 GN=LUC7L3 PE=1 SV=2	3	0	50.675	3.27513e+07	28774000
sp|O96000|NDUBA_HUMAN	sp|O96000|NDUBA_HUMAN	>sp|O96000|NDUBA_HUMAN NADH dehydrogenase [ubiquinone] 1 beta subcomplex subunit 10 OS=Homo sapiens OX=9606 GN=NDUFB10 PE=1 SV=3	3	0	14.54	4.27101e+07	38375000
sp|P01111|RASN_HUMAN;sp|P01116|RASK_HUMAN;sp|P01112|RASH_HUMAN	sp|P01111|RASN_HUMAN;sp|P01116|RASK_HUMAN	>sp|P01111|RASN_HUMAN GTPase NRas OS=Homo sapiens OX=9606 GN=NRAS PE=1 SV=1;>sp|P01116|RASK_HUMAN GTPase KRas OS=Homo sapiens OX=9606 GN=KRAS PE=1 SV=1	3	0.00075386	5.1284	1.26523e+07	28835000
sp|P01857|IGHG1_HUMAN;sp|P0DOX5|IGG1_HUMAN;sp|P01859|IGHG2_HUMAN;sp|P01860|IGHG3_HUMAN;sp|P01861|IGHG4_HUMAN	sp|P01857|IGHG1_HUMAN;sp|P0DOX5|IGG1_HUMAN;sp|P01859|IGHG2_HUMAN;sp|P01860|IGHG3_HUMAN	>sp|P01857|IGHG1_HUMAN Immunoglobulin heavy constant gamma 1 OS=Homo sapiens OX=9606 GN=IGHG1 PE=1 SV=1;>sp|P0DOX5|IGG1_HUMAN Immunoglobulin gamma-1 heavy chain OS=Homo sapiens OX=9606 PE=1 SV=2;>sp|P01859|IGHG2_HUMAN Immunoglobulin heavy constant gamma 2	3	0	7.3724	5.52178e+08	246640000
sp|P04114|APOB_HUMAN;CON__ENSEMBL:ENSBTAP00000032840	sp|P04114|APOB_HUMAN	>sp|P04114|APOB_HUMAN Apolipoprotein B-100 OS=Homo sapiens OX=9606 GN=APOB PE=1 SV=2	3	0	7.6721	1.31606e+07	9342000
sp|P05121|PAI1_HUMAN	sp|P05121|PAI1_HUMAN	>sp|P05121|PAI1_HUMAN Plasminogen activator inhibitor 1 OS=Homo sapiens OX=9606 GN=SERPINE1 PE=1 SV=1	3	0	13.054	2.54388e+06	9581300
sp|P06732|KCRM_HUMAN	sp|P06732|KCRM_HUMAN	>sp|P06732|KCRM_HUMAN Creatine kinase M-type OS=Homo sapiens OX=9606 GN=CKM PE=1 SV=2	3	0	11.165	0	0
sp|P07099|HYEP_HUMAN	sp|P07099|HYEP_HUMAN	>sp|P07099|HYEP_HUMAN Epoxide hydrolase 1 OS=Homo sapiens OX=9606 GN=EPHX1 PE=1 SV=1	3	0	12.39	6.15318e+06	5246000
sp|P07203|GPX1_HUMAN	sp|P07203|GPX1_HUMAN	>sp|P07203|GPX1_HUMAN Glutathione peroxidase 1 OS=Homo sapiens OX=9606 GN=GPX1 PE=1 SV=4	3	0	11.248	1.84453e+07	11232000
sp|P07711|CATL1_HUMAN	sp|P07711|CATL1_HUMAN	>sp|P07711|CATL1_HUMAN Cathepsin L1 OS=Homo sapiens OX=9606 GN=CTSL PE=1 SV=2	3	0	33.877	3.24839e+06	0
sp|P09429|HMGB1_HUMAN;sp|B2RPK0|HGB1A_HUMAN	sp|P09429|HMGB1_HUMAN	>sp|P09429|HMGB1_HUMAN High mobility group protein B1 OS=Homo sapiens OX=9606 GN=HMGB1 PE=1 SV=3	3	0	10.233	1.44127e+07	6170700
sp|P09914|IFIT1_HUMAN	sp|P09914|IFIT1_HUMAN	>sp|P09914|IFIT1_HUMAN Interferon-induced protein with tetratricopeptide repeats 1 OS=Homo sapiens OX=9606 GN=IFIT1 PE=1 SV=2	3	0	12.074	2.96091e+06	7289500
sp|P09972|ALDOC_HUMAN	sp|P09972|ALDOC_HUMAN	>sp|P09972|ALDOC_HUMAN Fructose-bisphosphate aldolase C OS=Homo sapiens OX=9606 GN=ALDOC PE=1 SV=2	3	0	89.707	6.81099e+07	40130000
sp|Q01081|U2AF1_HUMAN;sp|P0DN76|U2AF5_HUMAN;sp|Q8WU68|U2AF4_HUMAN	sp|Q01081|U2AF1_HUMAN;sp|P0DN76|U2AF5_HUMAN	>sp|Q01081|U2AF1_HUMAN Splicing factor U2AF 35 kDa subunit OS=Homo sapiens OX=9606 GN=U2AF1 PE=1 SV=3;>sp|P0DN76|U2AF5_HUMAN Splicing factor U2AF 35 kDa subunit-like protein OS=Homo sapiens OX=9606 GN=U2AF1L5 PE=1 SV=1	3	0	22.777	3.55193e+07	31224000
sp|P10398|ARAF_HUMAN;sp|P04049|RAF1_HUMAN;sp|P15056|BRAF_HUMAN	sp|P10398|ARAF_HUMAN	>sp|P10398|ARAF_HUMAN Serine/threonine-protein kinase A-Raf OS=Homo sapiens OX=9606 GN=ARAF PE=1 SV=2	3	0	8.5984	7.26739e+06	12143000
sp|P10768|ESTD_HUMAN	sp|P10768|ESTD_HUMAN	>sp|P10768|ESTD_HUMAN S-formylglutathione hydrolase OS=Homo sapiens OX=9606 GN=ESD PE=1 SV=2	3	0	19.013	8.01883e+07	63745000
sp|P10909|CLUS_HUMAN	sp|P10909|CLUS_HUMAN	>sp|P10909|CLUS_HUMAN Clusterin OS=Homo sapiens OX=9606 GN=CLU PE=1 SV=1	3	0	7.6245	1.06707e+07	6291300
sp|P11047|LAMC1_HUMAN	sp|P11047|LAMC1_HUMAN	>sp|P11047|LAMC1_HUMAN Laminin subunit gamma-1 OS=Homo sapiens OX=9606 GN=LAMC1 PE=1 SV=3	3	0	9.5481	3.89919e+06	1625400
sp|P13674|P4HA1_HUMAN	sp|P13674|P4HA1_HUMAN	>sp|P13674|P4HA1_HUMAN Prolyl 4-hydroxylase subunit alpha-1 OS=Homo sapiens OX=9606 GN=P4HA1 PE=1 SV=2	3	0	18.085	1.26568e+07	11336000
sp|P63162|RSMN_HUMAN;sp|P14678|RSMB_HUMAN	sp|P63162|RSMN_HUMAN;sp|P14678|RSMB_HUMAN	>sp|P63162|RSMN_HUMAN Small nuclear ribonucleoprotein-associated protein N OS=Homo sapiens OX=9606 GN=SNRPN PE=1 SV=1;>sp|P14678|RSMB_HUMAN Small nuclear ribonucleoprotein-associated proteins B and B OS=Homo sapiens OX=9606 GN=SNRPB PE=1 SV=2	3	0	8.3209	9.05603e+07	89908000
sp|P15927|RFA2_HUMAN	sp|P15927|RFA2_HUMAN	>sp|P15927|RFA2_HUMAN Replication protein A 32 kDa subunit OS=Homo sapiens OX=9606 GN=RPA2 PE=1 SV=1	3	0	21.2	3.52438e+07	22080000
sp|P18077|RL35A_HUMAN	sp|P18077|RL35A_HUMAN	>sp|P18077|RL35A_HUMAN 60S ribosomal protein L35a OS=Homo sapiens OX=9606 GN=RPL35A PE=1 SV=2	3	0	7.0611	2.28521e+08	171280000
sp|P19388|RPAB1_HUMAN	sp|P19388|RPAB1_HUMAN	>sp|P19388|RPAB1_HUMAN DNA-directed RNA polymerases I, II, and III subunit RPABC1 OS=Homo sapiens OX=9606 GN=POLR2E PE=1 SV=4	3	0	8.1823	2.21968e+07	13621000
sp|P19474|RO52_HUMAN	sp|P19474|RO52_HUMAN	>sp|P19474|RO52_HUMAN E3 ubiquitin-protein ligase TRIM21 OS=Homo sapiens OX=9606 GN=TRIM21 PE=1 SV=1	3	0	11.501	0	7951400
sp|P19823|ITIH2_HUMAN	sp|P19823|ITIH2_HUMAN	>sp|P19823|ITIH2_HUMAN Inter-alpha-trypsin inhibitor heavy chain H2 OS=Homo sapiens OX=9606 GN=ITIH2 PE=1 SV=2	3	0	8.8824	0	0
sp|P20073|ANXA7_HUMAN	sp|P20073|ANXA7_HUMAN	>sp|P20073|ANXA7_HUMAN Annexin A7 OS=Homo sapiens OX=9606 GN=ANXA7 PE=1 SV=3	3	0	17.525	3.84296e+07	30312000
sp|P21283|VATC1_HUMAN	sp|P21283|VATC1_HUMAN	>sp|P21283|VATC1_HUMAN V-type proton ATPase subunit C 1 OS=Homo sapiens OX=9606 GN=ATP6V1C1 PE=1 SV=4	3	0	7.5361	6.51364e+06	1141500
sp|P21953|ODBB_HUMAN	sp|P21953|ODBB_HUMAN	>sp|P21953|ODBB_HUMAN 2-oxoisovalerate dehydrogenase subunit beta, mitochondrial OS=Homo sapiens OX=9606 GN=BCKDHB PE=1 SV=2	3	0	17.993	3.49983e+06	5287200
sp|P23588|IF4B_HUMAN	sp|P23588|IF4B_HUMAN	>sp|P23588|IF4B_HUMAN Eukaryotic translation initiation factor 4B OS=Homo sapiens OX=9606 GN=EIF4B PE=1 SV=2	3	0	7.88	3.56822e+06	3381000
sp|P24941|CDK2_HUMAN	sp|P24941|CDK2_HUMAN	>sp|P24941|CDK2_HUMAN Cyclin-dependent kinase 2 OS=Homo sapiens OX=9606 GN=CDK2 PE=1 SV=2	3	0	6.0784	0	6958800
sp|P25685|DNJB1_HUMAN	sp|P25685|DNJB1_HUMAN	>sp|P25685|DNJB1_HUMAN DnaJ homolog subfamily B member 1 OS=Homo sapiens OX=9606 GN=DNAJB1 PE=1 SV=4	3	0	10.473	6.03969e+06	21308000
sp|P26358|DNMT1_HUMAN	sp|P26358|DNMT1_HUMAN	>sp|P26358|DNMT1_HUMAN DNA (cytosine-5)-methyltransferase 1 OS=Homo sapiens OX=9606 GN=DNMT1 PE=1 SV=2	3	0	8.8226	4.37946e+06	6146400
sp|P27105|STOM_HUMAN	sp|P27105|STOM_HUMAN	>sp|P27105|STOM_HUMAN Erythrocyte band 7 integral membrane protein OS=Homo sapiens OX=9606 GN=STOM PE=1 SV=3	3	0	52.463	2.52368e+07	14038000
sp|P27707|DCK_HUMAN	sp|P27707|DCK_HUMAN	>sp|P27707|DCK_HUMAN Deoxycytidine kinase OS=Homo sapiens OX=9606 GN=DCK PE=1 SV=1	3	0	6.1436	5.70929e+06	7321700
sp|P28161|GSTM2_HUMAN;sp|Q03013|GSTM4_HUMAN;sp|P09488|GSTM1_HUMAN;sp|P46439|GSTM5_HUMAN;sp|P21266|GSTM3_HUMAN	sp|P28161|GSTM2_HUMAN	>sp|P28161|GSTM2_HUMAN Glutathione S-transferase Mu 2 OS=Homo sapiens OX=9606 GN=GSTM2 PE=1 SV=2	3	0	7.9409	1.17101e+07	16565000
sp|P28676|GRAN_HUMAN	sp|P28676|GRAN_HUMAN	>sp|P28676|GRAN_HUMAN Grancalcin OS=Homo sapiens OX=9606 GN=GCA PE=1 SV=2	3	0	12.954	1.16825e+07	19993000
sp|P30085|KCY_HUMAN	sp|P30085|KCY_HUMAN	>sp|P30085|KCY_HUMAN UMP-CMP kinase OS=Homo sapiens OX=9606 GN=CMPK1 PE=1 SV=3	3	0	8.2454	1.63555e+06	1384000
sp|P30419|NMT1_HUMAN	sp|P30419|NMT1_HUMAN	>sp|P30419|NMT1_HUMAN Glycylpeptide N-tetradecanoyltransferase 1 OS=Homo sapiens OX=9606 GN=NMT1 PE=1 SV=2	3	0	13.321	1.03324e+07	13371000
sp|P30711|GSTT1_HUMAN	sp|P30711|GSTT1_HUMAN	>sp|P30711|GSTT1_HUMAN Glutathione S-transferase theta-1 OS=Homo sapiens OX=9606 GN=GSTT1 PE=1 SV=4	3	0	6.4886	1.68031e+07	23119000
sp|P31483|TIA1_HUMAN	sp|P31483|TIA1_HUMAN	>sp|P31483|TIA1_HUMAN Nucleolysin TIA-1 isoform p40 OS=Homo sapiens OX=9606 GN=TIA1 PE=1 SV=3	3	0.0061769	3.0163	1.18857e+06	1905100
sp|P32321|DCTD_HUMAN	sp|P32321|DCTD_HUMAN	>sp|P32321|DCTD_HUMAN Deoxycytidylate deaminase OS=Homo sapiens OX=9606 GN=DCTD PE=1 SV=2	3	0	12.984	3.51578e+07	38297000
sp|P33897|ABCD1_HUMAN	sp|P33897|ABCD1_HUMAN	>sp|P33897|ABCD1_HUMAN ATP-binding cassette sub-family D member 1 OS=Homo sapiens OX=9606 GN=ABCD1 PE=1 SV=2	3	0	34.897	1.81756e+06	15622000
sp|P33947|ERD22_HUMAN	sp|P33947|ERD22_HUMAN	>sp|P33947|ERD22_HUMAN ER lumen protein-retaining receptor 2 OS=Homo sapiens OX=9606 GN=KDELR2 PE=1 SV=1	3	0	20.405	1.48086e+07	10207000
sp|P34896|GLYC_HUMAN	sp|P34896|GLYC_HUMAN	>sp|P34896|GLYC_HUMAN Serine hydroxymethyltransferase, cytosolic OS=Homo sapiens OX=9606 GN=SHMT1 PE=1 SV=1	3	0.00073233	4.6146	1.57932e+07	7918800
sp|P34949|MPI_HUMAN	sp|P34949|MPI_HUMAN	>sp|P34949|MPI_HUMAN Mannose-6-phosphate isomerase OS=Homo sapiens OX=9606 GN=MPI PE=1 SV=2	3	0	9.1664	7.56255e+06	19707000
sp|P35613|BASI_HUMAN	sp|P35613|BASI_HUMAN	>sp|P35613|BASI_HUMAN Basigin OS=Homo sapiens OX=9606 GN=BSG PE=1 SV=2	3	0	10.005	0	7363500
sp|P37268|FDFT_HUMAN	sp|P37268|FDFT_HUMAN	>sp|P37268|FDFT_HUMAN Squalene synthase OS=Homo sapiens OX=9606 GN=FDFT1 PE=1 SV=1	3	0	20.363	1.3801e+07	9173900
sp|P39687|AN32A_HUMAN;sp|O43423|AN32C_HUMAN	sp|P39687|AN32A_HUMAN	>sp|P39687|AN32A_HUMAN Acidic leucine-rich nuclear phosphoprotein 32 family member A OS=Homo sapiens OX=9606 GN=ANP32A PE=1 SV=1	3	0	15.051	1.82135e+07	13326000
sp|P42285|MTREX_HUMAN	sp|P42285|MTREX_HUMAN	>sp|P42285|MTREX_HUMAN Exosome RNA helicase MTR4 OS=Homo sapiens OX=9606 GN=MTREX PE=1 SV=3	3	0	7.2597	7.04085e+07	49182000
sp|P42356|PI4KA_HUMAN	sp|P42356|PI4KA_HUMAN	>sp|P42356|PI4KA_HUMAN Phosphatidylinositol 4-kinase alpha OS=Homo sapiens OX=9606 GN=PI4KA PE=1 SV=4	3	0	7.377	3.70295e+06	8358000
sp|P48507|GSH0_HUMAN	sp|P48507|GSH0_HUMAN	>sp|P48507|GSH0_HUMAN Glutamate--cysteine ligase regulatory subunit OS=Homo sapiens OX=9606 GN=GCLM PE=1 SV=1	3	0	11.955	2.59942e+07	22638000
sp|P48651|PTSS1_HUMAN	sp|P48651|PTSS1_HUMAN	>sp|P48651|PTSS1_HUMAN Phosphatidylserine synthase 1 OS=Homo sapiens OX=9606 GN=PTDSS1 PE=1 SV=1	3	0	36.189	4.20698e+07	24812000
sp|P48960|CD97_HUMAN	sp|P48960|CD97_HUMAN	>sp|P48960|CD97_HUMAN CD97 antigen OS=Homo sapiens OX=9606 GN=CD97 PE=1 SV=4	3	0	21.992	1.34097e+07	12538000
sp|P49354|FNTA_HUMAN	sp|P49354|FNTA_HUMAN	>sp|P49354|FNTA_HUMAN Protein farnesyltransferase/geranylgeranyltransferase type-1 subunit alpha OS=Homo sapiens OX=9606 GN=FNTA PE=1 SV=1	3	0	19.724	7.21448e+06	8385000
sp|P49593|PPM1F_HUMAN	sp|P49593|PPM1F_HUMAN	>sp|P49593|PPM1F_HUMAN Protein phosphatase 1F OS=Homo sapiens OX=9606 GN=PPM1F PE=1 SV=3	3	0	7.5945	4.08017e+06	12612000
sp|P49755|TMEDA_HUMAN	sp|P49755|TMEDA_HUMAN	>sp|P49755|TMEDA_HUMAN Transmembrane emp24 domain-containing protein 10 OS=Homo sapiens OX=9606 GN=TMED10 PE=1 SV=2	3	0	10.122	2.45482e+07	24340000
sp|P49821|NDUV1_HUMAN	sp|P49821|NDUV1_HUMAN	>sp|P49821|NDUV1_HUMAN NADH dehydrogenase [ubiquinone] flavoprotein 1, mitochondrial OS=Homo sapiens OX=9606 GN=NDUFV1 PE=1 SV=4	3	0	6.4966	2.01931e+07	21062000
sp|P49841|GSK3B_HUMAN	sp|P49841|GSK3B_HUMAN	>sp|P49841|GSK3B_HUMAN Glycogen synthase kinase-3 beta OS=Homo sapiens OX=9606 GN=GSK3B PE=1 SV=2	3	0	58.413	2.20316e+07	28778000
sp|P49903|SPS1_HUMAN	sp|P49903|SPS1_HUMAN	>sp|P49903|SPS1_HUMAN Selenide, water dikinase 1 OS=Homo sapiens OX=9606 GN=SEPHS1 PE=1 SV=2	3	0	19.265	2.36152e+07	22390000
sp|P50452|SPB8_HUMAN	sp|P50452|SPB8_HUMAN	>sp|P50452|SPB8_HUMAN Serpin B8 OS=Homo sapiens OX=9606 GN=SERPINB8 PE=1 SV=2	3	0.00073502	4.6765	9.9103e+06	10956000
sp|P50579|MAP2_HUMAN	sp|P50579|MAP2_HUMAN	>sp|P50579|MAP2_HUMAN Methionine aminopeptidase 2 OS=Homo sapiens OX=9606 GN=METAP2 PE=1 SV=1	3	0	18.995	1.37735e+07	2750000
sp|P50750|CDK9_HUMAN	sp|P50750|CDK9_HUMAN	>sp|P50750|CDK9_HUMAN Cyclin-dependent kinase 9 OS=Homo sapiens OX=9606 GN=CDK9 PE=1 SV=3	3	0	25.793	1.03745e+07	12468000
sp|P51003|PAPOA_HUMAN;sp|Q9NRJ5|PAPOB_HUMAN	sp|P51003|PAPOA_HUMAN;sp|Q9NRJ5|PAPOB_HUMAN	>sp|P51003|PAPOA_HUMAN Poly(A) polymerase alpha OS=Homo sapiens OX=9606 GN=PAPOLA PE=1 SV=4;>sp|Q9NRJ5|PAPOB_HUMAN Poly(A) polymerase beta OS=Homo sapiens OX=9606 GN=PAPOLB PE=2 SV=1	3	0	13.331	1.99051e+07	16587000
sp|P51153|RAB13_HUMAN	sp|P51153|RAB13_HUMAN	>sp|P51153|RAB13_HUMAN Ras-related protein Rab-13 OS=Homo sapiens OX=9606 GN=RAB13 PE=1 SV=1	3	0	6.2554	1.87598e+07	15453000
sp|P51571|SSRD_HUMAN	sp|P51571|SSRD_HUMAN	>sp|P51571|SSRD_HUMAN Translocon-associated protein subunit delta OS=Homo sapiens OX=9606 GN=SSR4 PE=1 SV=1	3	0	14.668	2.37174e+07	15772000
sp|P51580|TPMT_HUMAN	sp|P51580|TPMT_HUMAN	>sp|P51580|TPMT_HUMAN Thiopurine S-methyltransferase OS=Homo sapiens OX=9606 GN=TPMT PE=1 SV=1	3	0	5.9302	9.00691e+06	10791000
sp|P51809|VAMP7_HUMAN	sp|P51809|VAMP7_HUMAN	>sp|P51809|VAMP7_HUMAN Vesicle-associated membrane protein 7 OS=Homo sapiens OX=9606 GN=VAMP7 PE=1 SV=3	3	0.00073665	4.7232	1.03542e+07	29473000
sp|P52434|RPAB3_HUMAN	sp|P52434|RPAB3_HUMAN	>sp|P52434|RPAB3_HUMAN DNA-directed RNA polymerases I, II, and III subunit RPABC3 OS=Homo sapiens OX=9606 GN=POLR2H PE=1 SV=4	3	0	42.308	4.90689e+07	24004000
sp|P52943|CRIP2_HUMAN	sp|P52943|CRIP2_HUMAN	>sp|P52943|CRIP2_HUMAN Cysteine-rich protein 2 OS=Homo sapiens OX=9606 GN=CRIP2 PE=1 SV=1	3	0	129.64	5.37362e+07	94006000
sp|P53367|ARFP1_HUMAN	sp|P53367|ARFP1_HUMAN	>sp|P53367|ARFP1_HUMAN Arfaptin-1 OS=Homo sapiens OX=9606 GN=ARFIP1 PE=1 SV=2	3	0	10.507	0	7954300
sp|P53384|NUBP1_HUMAN	sp|P53384|NUBP1_HUMAN	>sp|P53384|NUBP1_HUMAN Cytosolic Fe-S cluster assembly factor NUBP1 OS=Homo sapiens OX=9606 GN=NUBP1 PE=1 SV=2	3	0.00072464	4.4669	1.83971e+07	20205000
sp|P53985|MOT1_HUMAN	sp|P53985|MOT1_HUMAN	>sp|P53985|MOT1_HUMAN Monocarboxylate transporter 1 OS=Homo sapiens OX=9606 GN=SLC16A1 PE=1 SV=3	3	0	52.739	1.66161e+08	208870000
sp|P53999|TCP4_HUMAN	sp|P53999|TCP4_HUMAN	>sp|P53999|TCP4_HUMAN Activated RNA polymerase II transcriptional coactivator p15 OS=Homo sapiens OX=9606 GN=SUB1 PE=1 SV=3	3	0	11.513	4.55389e+06	16867000
sp|P54098|DPOG1_HUMAN	sp|P54098|DPOG1_HUMAN	>sp|P54098|DPOG1_HUMAN DNA polymerase subunit gamma-1 OS=Homo sapiens OX=9606 GN=POLG PE=1 SV=1	3	0	6.0942	1.10503e+09	551510000
sp|P54289|CA2D1_HUMAN	sp|P54289|CA2D1_HUMAN	>sp|P54289|CA2D1_HUMAN Voltage-dependent calcium channel subunit alpha-2/delta-1 OS=Homo sapiens OX=9606 GN=CACNA2D1 PE=1 SV=3	3	0	17.276	5.80902e+06	1721400
sp|P54619|AAKG1_HUMAN;sp|Q9UGJ0|AAKG2_HUMAN	sp|P54619|AAKG1_HUMAN	>sp|P54619|AAKG1_HUMAN 5-AMP-activated protein kinase subunit gamma-1 OS=Homo sapiens OX=9606 GN=PRKAG1 PE=1 SV=1	3	0	6.2843	1.03594e+07	8950500
sp|P54687|BCAT1_HUMAN	sp|P54687|BCAT1_HUMAN	>sp|P54687|BCAT1_HUMAN Branched-chain-amino-acid aminotransferase, cytosolic OS=Homo sapiens OX=9606 GN=BCAT1 PE=1 SV=3	3	0	6.5446	2.13969e+07	16938000
sp|P54709|AT1B3_HUMAN	sp|P54709|AT1B3_HUMAN	>sp|P54709|AT1B3_HUMAN Sodium/potassium-transporting ATPase subunit beta-3 OS=Homo sapiens OX=9606 GN=ATP1B3 PE=1 SV=1	3	0	8.5829	1.6872e+07	16879000
sp|P54819|KAD2_HUMAN	sp|P54819|KAD2_HUMAN	>sp|P54819|KAD2_HUMAN Adenylate kinase 2, mitochondrial OS=Homo sapiens OX=9606 GN=AK2 PE=1 SV=2	3	0	38.997	5.01362e+06	5645000
sp|P55036|PSMD4_HUMAN	sp|P55036|PSMD4_HUMAN	>sp|P55036|PSMD4_HUMAN 26S proteasome non-ATPase regulatory subunit 4 OS=Homo sapiens OX=9606 GN=PSMD4 PE=1 SV=1	3	0	19.183	4.16658e+07	49524000
sp|P55039|DRG2_HUMAN	sp|P55039|DRG2_HUMAN	>sp|P55039|DRG2_HUMAN Developmentally-regulated GTP-binding protein 2 OS=Homo sapiens OX=9606 GN=DRG2 PE=1 SV=1	3	0	19.313	8.62798e+06	8216000
sp|P57768|SNX16_HUMAN	sp|P57768|SNX16_HUMAN	>sp|P57768|SNX16_HUMAN Sorting nexin-16 OS=Homo sapiens OX=9606 GN=SNX16 PE=1 SV=2	3	0	10.979	0	1747700
sp|P60510|PP4C_HUMAN	sp|P60510|PP4C_HUMAN	>sp|P60510|PP4C_HUMAN Serine/threonine-protein phosphatase 4 catalytic subunit OS=Homo sapiens OX=9606 GN=PPP4C PE=1 SV=1	3	0	8.3451	2.54744e+07	19984000
sp|P61026|RAB10_HUMAN	sp|P61026|RAB10_HUMAN	>sp|P61026|RAB10_HUMAN Ras-related protein Rab-10 OS=Homo sapiens OX=9606 GN=RAB10 PE=1 SV=1	3	0	8.4047	3.58096e+07	38930000
sp|P61086|UBE2K_HUMAN	sp|P61086|UBE2K_HUMAN	>sp|P61086|UBE2K_HUMAN Ubiquitin-conjugating enzyme E2 K OS=Homo sapiens OX=9606 GN=UBE2K PE=1 SV=3	3	0	11.922	2.24355e+07	12772000
sp|P61289|PSME3_HUMAN	sp|P61289|PSME3_HUMAN	>sp|P61289|PSME3_HUMAN Proteasome activator complex subunit 3 OS=Homo sapiens OX=9606 GN=PSME3 PE=1 SV=1	3	0.00038358	5.4772	8.03134e+06	5347200
sp|P61421|VA0D1_HUMAN	sp|P61421|VA0D1_HUMAN	>sp|P61421|VA0D1_HUMAN V-type proton ATPase subunit d 1 OS=Homo sapiens OX=9606 GN=ATP6V0D1 PE=1 SV=1	3	0	55.505	3.59221e+07	36935000
sp|P61966|AP1S1_HUMAN;sp|Q96PC3|AP1S3_HUMAN;sp|P56377|AP1S2_HUMAN	sp|P61966|AP1S1_HUMAN	>sp|P61966|AP1S1_HUMAN AP-1 complex subunit sigma-1A OS=Homo sapiens OX=9606 GN=AP1S1 PE=1 SV=1	3	0	128.92	3.20512e+07	34093000
sp|P61970|NTF2_HUMAN	sp|P61970|NTF2_HUMAN	>sp|P61970|NTF2_HUMAN Nuclear transport factor 2 OS=Homo sapiens OX=9606 GN=NUTF2 PE=1 SV=1	3	0	25.036	1.72794e+07	22340000
sp|P62304|RUXE_HUMAN	sp|P62304|RUXE_HUMAN	>sp|P62304|RUXE_HUMAN Small nuclear ribonucleoprotein E OS=Homo sapiens OX=9606 GN=SNRPE PE=1 SV=1	3	0	21.946	8.32639e+07	60647000
sp|P62314|SMD1_HUMAN	sp|P62314|SMD1_HUMAN	>sp|P62314|SMD1_HUMAN Small nuclear ribonucleoprotein Sm D1 OS=Homo sapiens OX=9606 GN=SNRPD1 PE=1 SV=1	3	0	35.832	1.51345e+08	106170000
sp|P62633|CNBP_HUMAN	sp|P62633|CNBP_HUMAN	>sp|P62633|CNBP_HUMAN Cellular nucleic acid-binding protein OS=Homo sapiens OX=9606 GN=CNBP PE=1 SV=1	3	0	10.555	9.96366e+06	13046000
sp|P62847|RS24_HUMAN	sp|P62847|RS24_HUMAN	>sp|P62847|RS24_HUMAN 40S ribosomal protein S24 OS=Homo sapiens OX=9606 GN=RPS24 PE=1 SV=1	3	0	23.737	2.08943e+08	137080000
sp|P62913|RL11_HUMAN	sp|P62913|RL11_HUMAN	>sp|P62913|RL11_HUMAN 60S ribosomal protein L11 OS=Homo sapiens OX=9606 GN=RPL11 PE=1 SV=2	3	0	31.035	6.94721e+08	561100000
sp|P62995|TRA2B_HUMAN	sp|P62995|TRA2B_HUMAN	>sp|P62995|TRA2B_HUMAN Transformer-2 protein homolog beta OS=Homo sapiens OX=9606 GN=TRA2B PE=1 SV=1	3	0	26.243	3.11423e+07	21061000
sp|P63151|2ABA_HUMAN;sp|Q66LE6|2ABD_HUMAN;sp|Q00005|2ABB_HUMAN;sp|Q9Y2T4|2ABG_HUMAN	sp|P63151|2ABA_HUMAN;sp|Q66LE6|2ABD_HUMAN	>sp|P63151|2ABA_HUMAN Serine/threonine-protein phosphatase 2A 55 kDa regulatory subunit B alpha isoform OS=Homo sapiens OX=9606 GN=PPP2R2A PE=1 SV=1;>sp|Q66LE6|2ABD_HUMAN Serine/threonine-protein phosphatase 2A 55 kDa regulatory subunit B delta isoform OS=	3	0	8.7314	1.04905e+07	6635600
sp|P63165|SUMO1_HUMAN;sp|G2XKQ0|SUMO5_HUMAN	sp|P63165|SUMO1_HUMAN;sp|G2XKQ0|SUMO5_HUMAN	>sp|P63165|SUMO1_HUMAN Small ubiquitin-related modifier 1 OS=Homo sapiens OX=9606 GN=SUMO1 PE=1 SV=1;>sp|G2XKQ0|SUMO5_HUMAN Small ubiquitin-related modifier 5 OS=Homo sapiens OX=9606 GN=SUMO1P1 PE=1 SV=2	3	0	7.853	5.57732e+07	58721000
sp|P68871|HBB_HUMAN;sp|P02042|HBD_HUMAN	sp|P68871|HBB_HUMAN;sp|P02042|HBD_HUMAN	>sp|P68871|HBB_HUMAN Hemoglobin subunit beta OS=Homo sapiens OX=9606 GN=HBB PE=1 SV=2;>sp|P02042|HBD_HUMAN Hemoglobin subunit delta OS=Homo sapiens OX=9606 GN=HBD PE=1 SV=2	3	0	6.2112	0	0
sp|P69905|HBA_HUMAN	sp|P69905|HBA_HUMAN	>sp|P69905|HBA_HUMAN Hemoglobin subunit alpha OS=Homo sapiens OX=9606 GN=HBA1 PE=1 SV=2	3	0.00071633	4.2848	0	0
sp|P82664|RT10_HUMAN	sp|P82664|RT10_HUMAN	>sp|P82664|RT10_HUMAN 28S ribosomal protein S10, mitochondrial OS=Homo sapiens OX=9606 GN=MRPS10 PE=1 SV=2	3	0	8.9852	2.18801e+07	16813000
sp|P82979|SARNP_HUMAN	sp|P82979|SARNP_HUMAN	>sp|P82979|SARNP_HUMAN SAP domain-containing ribonucleoprotein OS=Homo sapiens OX=9606 GN=SARNP PE=1 SV=3	3	0	13.576	0	0
sp|P83436|COG7_HUMAN	sp|P83436|COG7_HUMAN	>sp|P83436|COG7_HUMAN Conserved oligomeric Golgi complex subunit 7 OS=Homo sapiens OX=9606 GN=COG7 PE=1 SV=1	3	0	9.0068	7.57609e+06	2752600
sp|P84095|RHOG_HUMAN	sp|P84095|RHOG_HUMAN	>sp|P84095|RHOG_HUMAN Rho-related GTP-binding protein RhoG OS=Homo sapiens OX=9606 GN=RHOG PE=1 SV=1	3	0	28.454	1.3101e+07	14210000
sp|P84098|RL19_HUMAN	sp|P84098|RL19_HUMAN	>sp|P84098|RL19_HUMAN 60S ribosomal protein L19 OS=Homo sapiens OX=9606 GN=RPL19 PE=1 SV=1	3	0	104.67	8.36254e+08	469980000
sp|Q00688|FKBP3_HUMAN	sp|Q00688|FKBP3_HUMAN	>sp|Q00688|FKBP3_HUMAN Peptidyl-prolyl cis-trans isomerase FKBP3 OS=Homo sapiens OX=9606 GN=FKBP3 PE=1 SV=1	3	0	9.3185	0	0
sp|Q01130|SRSF2_HUMAN;sp|Q9BRL6|SRSF8_HUMAN	sp|Q01130|SRSF2_HUMAN;sp|Q9BRL6|SRSF8_HUMAN	>sp|Q01130|SRSF2_HUMAN Serine/arginine-rich splicing factor 2 OS=Homo sapiens OX=9606 GN=SRSF2 PE=1 SV=4;>sp|Q9BRL6|SRSF8_HUMAN Serine/arginine-rich splicing factor 8 OS=Homo sapiens OX=9606 GN=SRSF8 PE=1 SV=1	3	0	22.842	2.60183e+07	27742000
sp|Q01804|OTUD4_HUMAN	sp|Q01804|OTUD4_HUMAN	>sp|Q01804|OTUD4_HUMAN OTU domain-containing protein 4 OS=Homo sapiens OX=9606 GN=OTUD4 PE=1 SV=4	3	0	8.7185	6.36974e+06	6086600
sp|Q01844|EWS_HUMAN	sp|Q01844|EWS_HUMAN	>sp|Q01844|EWS_HUMAN RNA-binding protein EWS OS=Homo sapiens OX=9606 GN=EWSR1 PE=1 SV=1	3	0	98.37	1.22885e+08	46931000
sp|Q04206|TF65_HUMAN	sp|Q04206|TF65_HUMAN	>sp|Q04206|TF65_HUMAN Transcription factor p65 OS=Homo sapiens OX=9606 GN=RELA PE=1 SV=2	3	0	9.7984	8.94196e+06	29258000
sp|Q05397|FAK1_HUMAN	sp|Q05397|FAK1_HUMAN	>sp|Q05397|FAK1_HUMAN Focal adhesion kinase 1 OS=Homo sapiens OX=9606 GN=PTK2 PE=1 SV=2	3	0	8.6529	5.07261e+06	2730300
sp|Q05655|KPCD_HUMAN	sp|Q05655|KPCD_HUMAN	>sp|Q05655|KPCD_HUMAN Protein kinase C delta type OS=Homo sapiens OX=9606 GN=PRKCD PE=1 SV=2	3	0	8.0904	5.55598e+06	5452900
sp|Q06265|EXOS9_HUMAN	sp|Q06265|EXOS9_HUMAN	>sp|Q06265|EXOS9_HUMAN Exosome complex component RRP45 OS=Homo sapiens OX=9606 GN=EXOSC9 PE=1 SV=3	3	0	12.885	3.47217e+07	13465000
sp|Q07954|LRP1_HUMAN	sp|Q07954|LRP1_HUMAN	>sp|Q07954|LRP1_HUMAN Prolow-density lipoprotein receptor-related protein 1 OS=Homo sapiens OX=9606 GN=LRP1 PE=1 SV=2	3	0.00038008	5.2993	0	832120
sp|Q07960|RHG01_HUMAN	sp|Q07960|RHG01_HUMAN	>sp|Q07960|RHG01_HUMAN Rho GTPase-activating protein 1 OS=Homo sapiens OX=9606 GN=ARHGAP1 PE=1 SV=1	3	0	14.207	3.81014e+06	8755300
sp|Q08379|GOGA2_HUMAN	sp|Q08379|GOGA2_HUMAN	>sp|Q08379|GOGA2_HUMAN Golgin subfamily A member 2 OS=Homo sapiens OX=9606 GN=GOLGA2 PE=1 SV=3	3	0	18.646	5.99998e+06	5117300
sp|Q12846|STX4_HUMAN	sp|Q12846|STX4_HUMAN	>sp|Q12846|STX4_HUMAN Syntaxin-4 OS=Homo sapiens OX=9606 GN=STX4 PE=1 SV=2	3	0	19.81	1.86393e+07	10816000
sp|Q13084|RM28_HUMAN	sp|Q13084|RM28_HUMAN	>sp|Q13084|RM28_HUMAN 39S ribosomal protein L28, mitochondrial OS=Homo sapiens OX=9606 GN=MRPL28 PE=1 SV=4	3	0	21.849	1.21519e+07	6749400
sp|Q13308|PTK7_HUMAN	sp|Q13308|PTK7_HUMAN	>sp|Q13308|PTK7_HUMAN Inactive tyrosine-protein kinase 7 OS=Homo sapiens OX=9606 GN=PTK7 PE=1 SV=2	3	0	7.7968	3.84227e+06	4617500
sp|Q13325|IFIT5_HUMAN	sp|Q13325|IFIT5_HUMAN	>sp|Q13325|IFIT5_HUMAN Interferon-induced protein with tetratricopeptide repeats 5 OS=Homo sapiens OX=9606 GN=IFIT5 PE=1 SV=1	3	0	21.201	1.73563e+07	16176000
sp|Q13428|TCOF_HUMAN	sp|Q13428|TCOF_HUMAN	>sp|Q13428|TCOF_HUMAN Treacle protein OS=Homo sapiens OX=9606 GN=TCOF1 PE=1 SV=3	3	0	11.095	0	4287900
sp|Q13459|MYO9B_HUMAN	sp|Q13459|MYO9B_HUMAN	>sp|Q13459|MYO9B_HUMAN Unconventional myosin-IXb OS=Homo sapiens OX=9606 GN=MYO9B PE=1 SV=3	3	0	6.4021	6.47497e+06	2719900
sp|Q13523|PRP4B_HUMAN	sp|Q13523|PRP4B_HUMAN	>sp|Q13523|PRP4B_HUMAN Serine/threonine-protein kinase PRP4 homolog OS=Homo sapiens OX=9606 GN=PRPF4B PE=1 SV=3	3	0	10.508	4.32747e+06	3585500
sp|Q13526|PIN1_HUMAN	sp|Q13526|PIN1_HUMAN	>sp|Q13526|PIN1_HUMAN Peptidyl-prolyl cis-trans isomerase NIMA-interacting 1 OS=Homo sapiens OX=9606 GN=PIN1 PE=1 SV=1	3	0	14.944	4.84206e+07	45021000
sp|Q13610|PWP1_HUMAN	sp|Q13610|PWP1_HUMAN	>sp|Q13610|PWP1_HUMAN Periodic tryptophan protein 1 homolog OS=Homo sapiens OX=9606 GN=PWP1 PE=1 SV=1	3	0	13.275	2.64728e+07	21536000
sp|Q13685|AAMP_HUMAN	sp|Q13685|AAMP_HUMAN	>sp|Q13685|AAMP_HUMAN Angio-associated migratory cell protein OS=Homo sapiens OX=9606 GN=AAMP PE=1 SV=2	3	0	13.362	1.51322e+07	13143000
sp|Q14012|KCC1A_HUMAN	sp|Q14012|KCC1A_HUMAN	>sp|Q14012|KCC1A_HUMAN Calcium/calmodulin-dependent protein kinase type 1 OS=Homo sapiens OX=9606 GN=CAMK1 PE=1 SV=1	3	0	11.48	6.81305e+06	9391500
sp|Q14156|EFR3A_HUMAN	sp|Q14156|EFR3A_HUMAN	>sp|Q14156|EFR3A_HUMAN Protein EFR3 homolog A OS=Homo sapiens OX=9606 GN=EFR3A PE=1 SV=2	3	0	35.127	6.8562e+06	8642900
sp|Q14160|SCRIB_HUMAN	sp|Q14160|SCRIB_HUMAN	>sp|Q14160|SCRIB_HUMAN Protein scribble homolog OS=Homo sapiens OX=9606 GN=SCRIB PE=1 SV=4	3	0	8.6762	1.25868e+07	9690300
sp|Q14185|DOCK1_HUMAN	sp|Q14185|DOCK1_HUMAN	>sp|Q14185|DOCK1_HUMAN Dedicator of cytokinesis protein 1 OS=Homo sapiens OX=9606 GN=DOCK1 PE=1 SV=2	3	0	9.4995	4.55194e+06	3866500
sp|Q15035|TRAM2_HUMAN	sp|Q15035|TRAM2_HUMAN	>sp|Q15035|TRAM2_HUMAN Translocating chain-associated membrane protein 2 OS=Homo sapiens OX=9606 GN=TRAM2 PE=1 SV=1	3	0	18.539	2.98077e+07	45014000
sp|Q15052|ARHG6_HUMAN	sp|Q15052|ARHG6_HUMAN	>sp|Q15052|ARHG6_HUMAN Rho guanine nucleotide exchange factor 6 OS=Homo sapiens OX=9606 GN=ARHGEF6 PE=1 SV=2	3	0	6.5155	5.71928e+06	0
sp|Q15058|KIF14_HUMAN	sp|Q15058|KIF14_HUMAN	>sp|Q15058|KIF14_HUMAN Kinesin-like protein KIF14 OS=Homo sapiens OX=9606 GN=KIF14 PE=1 SV=1	3	0	6.6243	3.35959e+06	894200
sp|Q15392|DHC24_HUMAN	sp|Q15392|DHC24_HUMAN	>sp|Q15392|DHC24_HUMAN Delta(24)-sterol reductase OS=Homo sapiens OX=9606 GN=DHCR24 PE=1 SV=2	3	0	6.6011	5.63344e+06	9636600
sp|Q15427|SF3B4_HUMAN	sp|Q15427|SF3B4_HUMAN	>sp|Q15427|SF3B4_HUMAN Splicing factor 3B subunit 4 OS=Homo sapiens OX=9606 GN=SF3B4 PE=1 SV=1	3	0	19.186	3.51211e+07	24178000
sp|Q15554|TERF2_HUMAN	sp|Q15554|TERF2_HUMAN	>sp|Q15554|TERF2_HUMAN Telomeric repeat-binding factor 2 OS=Homo sapiens OX=9606 GN=TERF2 PE=1 SV=3	3	0	10.095	1.03075e+07	7577300
sp|Q15555|MARE2_HUMAN	sp|Q15555|MARE2_HUMAN	>sp|Q15555|MARE2_HUMAN Microtubule-associated protein RP/EB family member 2 OS=Homo sapiens OX=9606 GN=MAPRE2 PE=1 SV=1	3	0	16.405	2.87622e+07	13642000
sp|Q15738|NSDHL_HUMAN	sp|Q15738|NSDHL_HUMAN	>sp|Q15738|NSDHL_HUMAN Sterol-4-alpha-carboxylate 3-dehydrogenase, decarboxylating OS=Homo sapiens OX=9606 GN=NSDHL PE=1 SV=2	3	0	9.5674	8.30734e+06	8305800
sp|Q15751|HERC1_HUMAN	sp|Q15751|HERC1_HUMAN	>sp|Q15751|HERC1_HUMAN Probable E3 ubiquitin-protein ligase HERC1 OS=Homo sapiens OX=9606 GN=HERC1 PE=1 SV=2	3	0.00038775	5.7486	2.14842e+06	2575600
sp|Q15773|MLF2_HUMAN	sp|Q15773|MLF2_HUMAN	>sp|Q15773|MLF2_HUMAN Myeloid leukemia factor 2 OS=Homo sapiens OX=9606 GN=MLF2 PE=1 SV=1	3	0	8.1531	6.01696e+07	60131000
sp|Q15796|SMAD2_HUMAN	sp|Q15796|SMAD2_HUMAN	>sp|Q15796|SMAD2_HUMAN Mothers against decapentaplegic homolog 2 OS=Homo sapiens OX=9606 GN=SMAD2 PE=1 SV=1	3	0.0003827	5.4498	2.65749e+07	31151000
sp|Q15800|MSMO1_HUMAN	sp|Q15800|MSMO1_HUMAN	>sp|Q15800|MSMO1_HUMAN Methylsterol monooxygenase 1 OS=Homo sapiens OX=9606 GN=MSMO1 PE=1 SV=1	3	0	66.979	5.0088e+07	47024000
sp|Q16222|UAP1_HUMAN	sp|Q16222|UAP1_HUMAN	>sp|Q16222|UAP1_HUMAN UDP-N-acetylhexosamine pyrophosphorylase OS=Homo sapiens OX=9606 GN=UAP1 PE=1 SV=3	3	0	7.3191	8.61593e+06	6547100
sp|Q16718|NDUA5_HUMAN	sp|Q16718|NDUA5_HUMAN	>sp|Q16718|NDUA5_HUMAN NADH dehydrogenase [ubiquinone] 1 alpha subcomplex subunit 5 OS=Homo sapiens OX=9606 GN=NDUFA5 PE=1 SV=3	3	0	14.752	6.8655e+06	4644500
sp|Q16775|GLO2_HUMAN	sp|Q16775|GLO2_HUMAN	>sp|Q16775|GLO2_HUMAN Hydroxyacylglutathione hydrolase, mitochondrial OS=Homo sapiens OX=9606 GN=HAGH PE=1 SV=2	3	0	9.9718	1.28852e+07	22722000
sp|Q16832|DDR2_HUMAN	sp|Q16832|DDR2_HUMAN	>sp|Q16832|DDR2_HUMAN Discoidin domain-containing receptor 2 OS=Homo sapiens OX=9606 GN=DDR2 PE=1 SV=2	3	0	6.1402	1.33259e+07	15490000
sp|Q16850|CP51A_HUMAN	sp|Q16850|CP51A_HUMAN	>sp|Q16850|CP51A_HUMAN Lanosterol 14-alpha demethylase OS=Homo sapiens OX=9606 GN=CYP51A1 PE=1 SV=3	3	0	8.576	3.20225e+06	4009200
sp|Q2TB90|HKDC1_HUMAN	sp|Q2TB90|HKDC1_HUMAN	>sp|Q2TB90|HKDC1_HUMAN Hexokinase HKDC1 OS=Homo sapiens OX=9606 GN=HKDC1 PE=1 SV=3	3	0	6.3489	1.50507e+07	14563000
sp|Q32P44|EMAL3_HUMAN	sp|Q32P44|EMAL3_HUMAN	>sp|Q32P44|EMAL3_HUMAN Echinoderm microtubule-associated protein-like 3 OS=Homo sapiens OX=9606 GN=EML3 PE=1 SV=1	3	0	12.177	4.35547e+06	9633300
sp|Q3KQU3|MA7D1_HUMAN	sp|Q3KQU3|MA7D1_HUMAN	>sp|Q3KQU3|MA7D1_HUMAN MAP7 domain-containing protein 1 OS=Homo sapiens OX=9606 GN=MAP7D1 PE=1 SV=1	3	0	7.5461	1.01398e+07	9827700
sp|Q3KQV9|UAP1L_HUMAN	sp|Q3KQV9|UAP1L_HUMAN	>sp|Q3KQV9|UAP1L_HUMAN UDP-N-acetylhexosamine pyrophosphorylase-like protein 1 OS=Homo sapiens OX=9606 GN=UAP1L1 PE=1 SV=2	3	0	10.749	1.48258e+07	14635000
sp|Q53HC9|EIPR1_HUMAN	sp|Q53HC9|EIPR1_HUMAN	>sp|Q53HC9|EIPR1_HUMAN EARP and GARP complex-interacting protein 1 OS=Homo sapiens OX=9606 GN=EIPR1 PE=1 SV=2	3	0	7.4952	6.88042e+06	23804000
sp|Q5GLZ8|HERC4_HUMAN	sp|Q5GLZ8|HERC4_HUMAN	>sp|Q5GLZ8|HERC4_HUMAN Probable E3 ubiquitin-protein ligase HERC4 OS=Homo sapiens OX=9606 GN=HERC4 PE=1 SV=1	3	0	24.742	4.54953e+06	17675000
sp|Q5JPH6|SYEM_HUMAN	sp|Q5JPH6|SYEM_HUMAN	>sp|Q5JPH6|SYEM_HUMAN Probable glutamate--tRNA ligase, mitochondrial OS=Homo sapiens OX=9606 GN=EARS2 PE=1 SV=2	3	0	7.2345	2.58106e+07	2813600
sp|Q5RKV6|EXOS6_HUMAN	sp|Q5RKV6|EXOS6_HUMAN	>sp|Q5RKV6|EXOS6_HUMAN Exosome complex component MTR3 OS=Homo sapiens OX=9606 GN=EXOSC6 PE=1 SV=1	3	0	18.219	2.47732e+07	6443800
sp|Q5T8P6|RBM26_HUMAN;sp|Q9P2N5|RBM27_HUMAN	sp|Q5T8P6|RBM26_HUMAN	>sp|Q5T8P6|RBM26_HUMAN RNA-binding protein 26 OS=Homo sapiens OX=9606 GN=RBM26 PE=1 SV=3	3	0	8.0468	8.36587e+06	3422500
sp|Q5VW32|BROX_HUMAN	sp|Q5VW32|BROX_HUMAN	>sp|Q5VW32|BROX_HUMAN BRO1 domain-containing protein BROX OS=Homo sapiens OX=9606 GN=BROX PE=1 SV=1	3	0	11.365	1.73804e+07	21114000
sp|Q5XKP0|MIC13_HUMAN	sp|Q5XKP0|MIC13_HUMAN	>sp|Q5XKP0|MIC13_HUMAN MICOS complex subunit MIC13 OS=Homo sapiens OX=9606 GN=MICOS13 PE=1 SV=1	3	0	31.763	2.677e+07	12060000
sp|Q63HR2|TNS2_HUMAN	sp|Q63HR2|TNS2_HUMAN	>sp|Q63HR2|TNS2_HUMAN Tensin-2 OS=Homo sapiens OX=9606 GN=TNS2 PE=1 SV=2	3	0.0094251	2.6528	4.34859e+06	3937400
sp|Q9Y4E1|WAC2C_HUMAN;sp|Q641Q2|WAC2A_HUMAN	sp|Q9Y4E1|WAC2C_HUMAN;sp|Q641Q2|WAC2A_HUMAN	>sp|Q9Y4E1|WAC2C_HUMAN WASH complex subunit 2C OS=Homo sapiens OX=9606 GN=WASHC2C PE=1 SV=4;>sp|Q641Q2|WAC2A_HUMAN WASH complex subunit 2A OS=Homo sapiens OX=9606 GN=WASHC2A PE=1 SV=3	3	0	10.729	0	9399800
sp|Q643R3|LPCT4_HUMAN	sp|Q643R3|LPCT4_HUMAN	>sp|Q643R3|LPCT4_HUMAN Lysophospholipid acyltransferase LPCAT4 OS=Homo sapiens OX=9606 GN=LPCAT4 PE=1 SV=1	3	0	8.2273	1.44563e+06	7510200
sp|Q6DKJ4|NXN_HUMAN	sp|Q6DKJ4|NXN_HUMAN	>sp|Q6DKJ4|NXN_HUMAN Nucleoredoxin OS=Homo sapiens OX=9606 GN=NXN PE=1 SV=2	3	0	13.079	2.21027e+07	24720000
sp|Q6FI81|CPIN1_HUMAN	sp|Q6FI81|CPIN1_HUMAN	>sp|Q6FI81|CPIN1_HUMAN Anamorsin OS=Homo sapiens OX=9606 GN=CIAPIN1 PE=1 SV=2	3	0	10.995	835726	6163700
sp|Q6IAA8|LTOR1_HUMAN	sp|Q6IAA8|LTOR1_HUMAN	>sp|Q6IAA8|LTOR1_HUMAN Ragulator complex protein LAMTOR1 OS=Homo sapiens OX=9606 GN=LAMTOR1 PE=1 SV=2	3	0	19.212	8.88733e+06	11252000
sp|Q6IN85|P4R3A_HUMAN	sp|Q6IN85|P4R3A_HUMAN	>sp|Q6IN85|P4R3A_HUMAN Serine/threonine-protein phosphatase 4 regulatory subunit 3A OS=Homo sapiens OX=9606 GN=PPP4R3A PE=1 SV=1	3	0.00038402	5.5019	1.18202e+07	7720000
sp|Q6KC79|NIPBL_HUMAN	sp|Q6KC79|NIPBL_HUMAN	>sp|Q6KC79|NIPBL_HUMAN Nipped-B-like protein OS=Homo sapiens OX=9606 GN=NIPBL PE=1 SV=2	3	0.00074683	4.9141	2.17091e+06	4264400
sp|Q6NUQ1|RINT1_HUMAN	sp|Q6NUQ1|RINT1_HUMAN	>sp|Q6NUQ1|RINT1_HUMAN RAD50-interacting protein 1 OS=Homo sapiens OX=9606 GN=RINT1 PE=1 SV=1	3	0	7.6242	3.22957e+06	7718000
sp|Q6P2I3|FAH2B_HUMAN	sp|Q6P2I3|FAH2B_HUMAN	>sp|Q6P2I3|FAH2B_HUMAN Fumarylacetoacetate hydrolase domain-containing protein 2B OS=Homo sapiens OX=9606 GN=FAHD2B PE=1 SV=1	3	0.00038417	5.5331	1.09435e+06	820400
sp|Q6PCB7|S27A1_HUMAN	sp|Q6PCB7|S27A1_HUMAN	>sp|Q6PCB7|S27A1_HUMAN Long-chain fatty acid transport protein 1 OS=Homo sapiens OX=9606 GN=SLC27A1 PE=1 SV=1	3	0	6.2994	3.85397e+06	3956000
sp|Q6UN15|FIP1_HUMAN	sp|Q6UN15|FIP1_HUMAN	>sp|Q6UN15|FIP1_HUMAN Pre-mRNA 3-end-processing factor FIP1 OS=Homo sapiens OX=9606 GN=FIP1L1 PE=1 SV=1	3	0	10.477	4.88061e+06	8312500
sp|Q6Y1H2|HACD2_HUMAN	sp|Q6Y1H2|HACD2_HUMAN	>sp|Q6Y1H2|HACD2_HUMAN Very-long-chain (3R)-3-hydroxyacyl-CoA dehydratase 2 OS=Homo sapiens OX=9606 GN=HACD2 PE=1 SV=1	3	0	11.495	8.36105e+07	100420000
sp|Q6YHU6|THADA_HUMAN	sp|Q6YHU6|THADA_HUMAN	>sp|Q6YHU6|THADA_HUMAN Thyroid adenoma-associated protein OS=Homo sapiens OX=9606 GN=THADA PE=1 SV=1	3	0	8.9897	3.36464e+06	1163400
sp|Q6YP21|KAT3_HUMAN	sp|Q6YP21|KAT3_HUMAN	>sp|Q6YP21|KAT3_HUMAN Kynurenine--oxoglutarate transaminase 3 OS=Homo sapiens OX=9606 GN=KYAT3 PE=1 SV=1	3	0	11.982	5.63424e+06	15023000
sp|Q6ZSR9|YJ005_HUMAN	sp|Q6ZSR9|YJ005_HUMAN	>sp|Q6ZSR9|YJ005_HUMAN Uncharacterized protein FLJ45252 OS=Homo sapiens OX=9606 PE=2 SV=2	3	0	12.914	1.32077e+07	20647000
sp|Q6ZXV5|TMTC3_HUMAN	sp|Q6ZXV5|TMTC3_HUMAN	>sp|Q6ZXV5|TMTC3_HUMAN Protein O-mannosyl-transferase TMTC3 OS=Homo sapiens OX=9606 GN=TMTC3 PE=1 SV=2	3	0	9.6361	6.49746e+06	8593900
sp|Q70E73|RAPH1_HUMAN	sp|Q70E73|RAPH1_HUMAN	>sp|Q70E73|RAPH1_HUMAN Ras-associated and pleckstrin homology domains-containing protein 1 OS=Homo sapiens OX=9606 GN=RAPH1 PE=1 SV=3	3	0	10.252	1.54065e+07	15692000
sp|Q71UM5|RS27L_HUMAN	sp|Q71UM5|RS27L_HUMAN	>sp|Q71UM5|RS27L_HUMAN 40S ribosomal protein S27-like OS=Homo sapiens OX=9606 GN=RPS27L PE=1 SV=3	3	0.00037965	5.2859	2.30414e+07	13564000
sp|Q7L523|RRAGA_HUMAN;sp|Q5VZM2|RRAGB_HUMAN	sp|Q7L523|RRAGA_HUMAN	>sp|Q7L523|RRAGA_HUMAN Ras-related GTP-binding protein A OS=Homo sapiens OX=9606 GN=RRAGA PE=1 SV=1	3	0	8.7175	5.58283e+06	7349600
sp|Q7L775|EPMIP_HUMAN	sp|Q7L775|EPMIP_HUMAN	>sp|Q7L775|EPMIP_HUMAN EPM2A-interacting protein 1 OS=Homo sapiens OX=9606 GN=EPM2AIP1 PE=1 SV=1	3	0	5.9352	6.41667e+06	4677700
sp|Q7L8L6|FAKD5_HUMAN	sp|Q7L8L6|FAKD5_HUMAN	>sp|Q7L8L6|FAKD5_HUMAN FAST kinase domain-containing protein 5, mitochondrial OS=Homo sapiens OX=9606 GN=FASTKD5 PE=1 SV=1	3	0	12.923	9.60917e+06	8713300
sp|Q9H8S9|MOB1A_HUMAN;sp|Q7L9L4|MOB1B_HUMAN	sp|Q9H8S9|MOB1A_HUMAN;sp|Q7L9L4|MOB1B_HUMAN	>sp|Q9H8S9|MOB1A_HUMAN MOB kinase activator 1A OS=Homo sapiens OX=9606 GN=MOB1A PE=1 SV=4;>sp|Q7L9L4|MOB1B_HUMAN MOB kinase activator 1B OS=Homo sapiens OX=9606 GN=MOB1B PE=1 SV=3	3	0	8.9296	4.21076e+07	30500000
[truncated: 1,121 more rows]
